# Supplementary material for: Tandem Mass Tag-based proteomics analysis reveals the vital role of inflammation in traumatic brain injury in a mouse model
Source: PubMed Central journal article supplement — Neural Regen Res. 2022 Apr 25;18(1):155–61. doi: 10.4103/1673-5374.343886 (PMC9241417; doi:10.4103/1673-5374.343886), 2022-04-25
Supplement: NRR-18-155_Suppl1.pdf [file NRR-18-155_Suppl1.pdf]

**Additional Table 1: The identified proteins in 7 days post-TBI cortex tissues using a large-scale proteomics investigation**

| Scale proteomics | GeneName        | Description       | Protein FDR Confidence: Combined | Coverage [%] | # Peptides | # PSMs | # Unique Peptides | # AAs | MW [kDa] | calc. pI | Score Mascot: Mascot | Abundances TBI7d_1 | Abundances TBI7d_2 | Abundances TBI7d_3 | Abundances Con7d_1 | Abundances Con7d_2 | Abundances Con7d_3 |
|------------------|-----------------|-------------------|----------------------------------|--------------|------------|--------|-------------------|-------|----------|----------|----------------------|--------------------|--------------------|--------------------|--------------------|--------------------|--------------------|
| Q9JMC8           | <i>Epb414b</i>  | Band 4.1-like     | Low                              | 2            | 1          | 1      | 1                 | 527   | 59.5     | 9.29     | 0                    |                    |                    |                    |                    |                    |                    |
| Q9WU01           | <i>Khdrbs2</i>  | KH domain-        | High                             | 8            | 3          | 8      | 2                 | 349   | 38.8     | 6.48     | 82                   | 102.3              | 96.9               | 97.1               | 102.1              | 104.8              | 96.8               |
| Q9EPC1           | <i>Parva</i>    | Alpha-parvin      | High                             | 9            | 3          | 4      | 3                 | 372   | 42.3     | 5.95     | 98                   | 105.4              | 102                | 103.3              | 95.5               | 97.5               | 96.3               |
| Q9D7A8           | <i>Armc1</i>    | Armado repeat-    | High                             | 11           | 3          | 7      | 3                 | 282   | 31.2     | 5.57     | 174                  | 101.8              | 103.7              | 95.5               | 100.7              | 99                 | 99.3               |
| P70268           | <i>Pkn1</i>     | Serine/threonine  | High                             | 1            | 1          | 2      | 1                 | 946   | 104.3    | 6.27     | 68                   | 97.5               | 103.1              | 110.8              | 91.9               | 91.8               | 104.8              |
| Q9QXG2           | <i>Chm</i>      | Rab proteins      | High                             | 14           | 6          | 7      | 6                 | 665   | 73.9     | 4.68     | 90                   | 97.2               | 103.3              | 92                 | 102.3              | 104.5              | 100.7              |
| Q8R3F5           | <i>Mcat</i>     | Malonyl-CoA-      | High                             | 13           | 4          | 4      | 4                 | 381   | 41.9     | 8.1      | 54                   | 94.8               | 97.3               | 93.1               | 102.7              | 109.7              | 102.4              |
| P62876           | <i>Polr2l</i>   | DNA-directed      | High                             | 13           | 1          | 2      | 1                 | 67    | 7.6      | 7.77     | 29                   | 105                | 97.4               | 102.5              | 99                 | 97.4               | 98.6               |
| O08715           | <i>Akap1</i>    | A-kinase anchor   | Medium                           | 3            | 1          | 1      | 1                 | 857   | 92.1     | 5.02     | 20                   | 102.4              | 94.3               | 91.8               | 110.3              | 99.4               | 101.8              |
| P45952           | <i>Acadm</i>    | Medium-chain      | High                             | 27           | 10         | 15     | 10                | 421   | 46.5     | 8.37     | 190                  | 98.5               | 103                | 103.4              | 95.9               | 99.6               | 99.6               |
| Q8K4Q7           | <i>Cerk</i>     | Ceramide kinase   | Low                              | 3            | 1          | 1      | 1                 | 531   | 59.8     | 7.62     | 0                    | 117.6              | 71.5               | 106.7              | 107.9              | 97.5               | 98.9               |
| P70297           | <i>Stam</i>     | Signal            | High                             | 27           | 11         | 17     | 11                | 548   | 59.7     | 4.84     | 352                  | 91.2               | 97.6               | 90.5               | 108.2              | 107                | 105.4              |
| Q9CSU0           | <i>Rprd1b</i>   | Regulation of     | High                             | 14           | 3          | 3      | 3                 | 326   | 36.9     | 5.97     | 125                  | 93.9               | 102.9              | 109.9              | 97.4               | 99.6               | 96.3               |
| Q99LC5           | <i>Efta</i>     | Electron transfer | High                             | 53           | 13         | 30     | 13                | 333   | 35       | 8.38     | 745                  | 99.5               | 101.9              | 106.5              | 97.5               | 95.8               | 98.8               |
| Q60928           | <i>Ggt1</i>     | Glutathione       | High                             | 2            | 1          | 1      | 1                 | 568   | 61.5     | 7.15     | 45                   | 87.9               | 110.7              | 92.2               | 97.5               | 102.4              | 109.2              |
| Q3URE1           | <i>Acsf3</i>    | Malonate--CoA     | High                             | 23           | 10         | 10     | 10                | 583   | 65       | 8.02     | 81                   | 95                 | 101                | 81                 | 103.5              | 103.7              | 115.7              |
| Q8BZW2           | <i>Sowahb</i>   | Ankyrin repeat    | Medium                           | 3            | 1          | 1      | 1                 | 760   | 83.5     | 8.27     | 0                    |                    |                    |                    |                    |                    |                    |
| P33609           | <i>Pola1</i>    | DNA polymerase    | Low                              | 1            | 1          | 1      | 1                 | 1465  | 167.2    | 5.74     | 0                    |                    |                    |                    |                    |                    |                    |
| Q61584           | <i>Fxr1</i>     | Fragile X mental  | High                             | 9            | 5          | 5      | 4                 | 677   | 76.2     | 6.98     | 54                   | 112                | 95                 | 140                | 80.2               | 87.3               | 85.5               |
| Q6P4S8           | <i>Ints1</i>    | Integrator        | Low                              | 1            | 1          | 2      | 1                 | 2195  | 245      | 6.28     | 0                    | 88.8               | 110.7              | 88.7               | 113.2              | 89.1               | 109.5              |
| Q31125           | <i>Slc39a7</i>  | Zinc transporter  | Medium                           | 2            | 1          | 1      | 1                 | 476   | 50.6     | 6.87     | 21                   |                    |                    |                    |                    |                    |                    |
| Q8R104           | <i>Sirt3</i>    | NAD-dependent     | Low                              | 3            | 1          | 1      | 1                 | 334   | 36.6     | 7.44     | 13                   | 95.2               | 107.5              | 84.4               | 107.9              | 112.9              | 92                 |
| Q8BH82           | <i>Napepld</i>  | N-acyl-           | High                             | 4            | 1          | 1      | 1                 | 396   | 45.8     | 5.94     | 25                   | 83.4               | 107                | 102.4              | 102.9              | 91.9               | 112.4              |
| Q3UHI4           | <i>Tmed8</i>    | Protein TMED8     | High                             | 8            | 2          | 2      | 2                 | 326   | 35.8     | 4.74     | 51                   | 95                 | 101.8              | 97.6               | 110.7              | 96.3               | 98.6               |
| P01901           | <i>H2-K1</i>    | H-2 class I       | High                             | 18           | 5          | 6      | 3                 | 369   | 41.3     | 6.39     | 106                  | 103.6              | 103.1              | 140.6              | 81.1               | 85.7               | 85.9               |
| Q03141           | <i>Mark3</i>    | MAP/microtubule   | High                             | 18           | 13         | 19     | 6                 | 753   | 84.3     | 9.51     | 282                  | 93.2               | 98.1               | 90                 | 105.4              | 107                | 106.4              |
| O35136           | <i>Ncam2</i>    | Neural cell       | High                             | 31           | 23         | 39     | 23                | 837   | 93.1     | 6.07     | 591                  | 96                 | 96.5               | 87.3               | 104.2              | 108.3              | 107.7              |
| Q99LM2           | <i>Cdk5rap3</i> | CDK5 regulatory   | High                             | 7            | 3          | 3      | 3                 | 503   | 57       | 4.83     | 58                   | 91.1               | 102.8              | 92.4               | 104.5              | 106.7              | 102.5              |
| P53026           | <i>Rpl10a</i>   | 60S ribosomal     | High                             | 29           | 7          | 15     | 7                 | 217   | 24.9     | 9.98     | 241                  | 104.3              | 100                | 103.7              | 97.2               | 99.7               | 95.1               |
| P12970           | <i>Rpl7a</i>    | 60S ribosomal     | High                             | 42           | 13         | 17     | 13                | 266   | 30       | 10.56    | 305                  | 101.9              | 96.2               | 105.4              | 100.6              | 97.5               | 98.5               |
| P46467           | <i>Vps4b</i>    | Vacuolar protein  | High                             | 13           | 5          | 7      | 2                 | 444   | 49.4     | 7.11     | 143                  | 103.7              | 95.3               | 100.7              | 101.7              | 99.1               | 99.4               |
| E0CYV9           |                 | Uncharacterized   | Low                              | 1            | 1          | 1      | 1                 | 1786  | 189.6    | 8.57     | 0                    | 92.5               | 107.8              | 98.5               | 104.1              | 94.1               | 103.1              |
| Q3UQ44           | <i>Iqgap2</i>   | Ras GTPase-       | High                             | 7            | 8          | 9      | 8                 | 1575  | 180.4    | 5.64     | 156                  | 94.5               | 101.3              | 98.1               | 100                | 99.9               | 106.2              |
| Q9JJY3           | <i>Smpd3</i>    | Sphingomyelin     | High                             | 16           | 8          | 10     | 8                 | 655   | 71.2     | 5.88     | 114                  | 90.6               | 93.5               | 92.9               | 104.4              | 108.7              | 109.9              |
| Q924N4           | <i>Slc12a6</i>  | Solute carrier    | High                             | 13           | 13         | 18     | 7                 | 1150  | 127.4    | 7.03     | 246                  | 94.5               | 96.8               | 89.4               | 113.4              | 99.4               | 106.5              |
| O70475           | <i>Ugdh</i>     | UDP-glucose 6-    | High                             | 6            | 2          | 2      | 2                 | 493   | 54.8     | 7.56     | 0                    | 86.7               | 116.7              | 111.4              | 85.2               | 90.6               | 109.3              |
| Q9CR95           | <i>Necap1</i>   | Adaptin ear-      | High                             | 48           | 10         | 18     | 10                | 275   | 29.6     | 6.38     | 349                  | 95.1               | 103.7              | 89.5               | 103                | 107.1              | 101.5              |
| Q8BH59           | <i>Slc25a12</i> | Calcium-binding   | High                             | 55           | 28         | 75     | 23                | 677   | 74.5     | 8.25     | 1622                 | 97                 | 103.9              | 93.1               | 103.2              | 103.1              | 99.7               |
| Q63829           | <i>Comm3</i>    | COMM domain-      | High                             | 44           | 7          | 8      | 7                 | 195   | 22       | 5.59     | 155                  | 101.3              | 103.3              | 96.2               | 98.8               | 94.9               | 105.5              |
| Q8BG81           | <i>Poldip3</i>  | Polymerase        | Medium                           | 4            | 2          | 2      | 2                 | 420   | 46.1     | 10.05    | 21                   | 98.5               | 98.8               | 103                | 100.1              | 103.3              | 96.3               |
| Q9CQ19           | <i>Myl9</i>     | Myosin            | High                             | 49           | 6          | 12     | 2                 | 172   | 19.8     | 4.92     | 298                  | 101.7              | 102.7              | 116.8              | 84.3               | 99                 | 95.6               |
| P26049           | <i>Gabra3</i>   | Gamma-            | High                             | 9            | 4          | 5      | 3                 | 492   | 55.4     | 8.94     | 54                   | 105.6              | 95.9               | 102.7              | 101.8              | 97.5               | 96.6               |
| Q8BMA6           | <i>Srp68</i>    | Signal            | High                             | 18           | 9          | 11     | 9                 | 625   | 70.5     | 8.57     | 120                  | 103.8              | 100.8              | 102.6              | 98.6               | 97.6               | 96.7               |
| Q9QUH0           | <i>Glrx</i>     | Glutaredoxin-1    | High                             | 45           | 5          | 5      | 5                 | 107   | 11.9     | 8.37     | 77                   | 94.9               | 104.2              | 93.1               | 102.7              | 99.4               | 105.6              |
| Q9EQG9           | <i>Cert1</i>    | Ceramide          | High                             | 3            | 2          | 2      | 2                 | 624   | 71.1     | 5.44     | 34                   | 97.7               | 93.4               | 92.5               | 98                 | 108.7              | 109.7              |
| Q3UMT1           | <i>Ppp1r12c</i> | Protein           | High                             | 2            | 2          | 2      | 2                 | 782   | 84.6     | 6        | 22                   | 97.8               | 100.5              | 99                 | 98.4               | 104.2              | 100                |
| P70670           | <i>Naca</i>     | Nascent           | High                             | 3            | 4          | 12     | 4                 | 2187  | 220.4    | 9.35     | 377                  | 99.8               | 100.8              | 95.9               | 98.8               | 101.4              | 103.2              |
| P43274           | <i>H1-4</i>     | Histone H1.4      | High                             | 38           | 11         | 20     | 5                 | 219   | 22       | 11.11    | 410                  | 95.2               | 94.6               | 124.6              | 86.7               | 92.8               | 106.2              |
| Q8BXR1           | <i>Slc7a14</i>  | Probable          | High                             | 12           | 8          | 10     | 8                 | 771   | 83.9     | 5.35     | 156                  | 101.3              | 90.7               | 108.8              | 97                 | 102.1              | 100                |
| Q6P5G6           | <i>Ubxn7</i>    | UBX domain-       | High                             | 12           | 4          | 4      | 4                 | 467   | 52.1     | 5.03     | 80                   | 91.7               | 103.7              | 90.2               | 87.6               | 111.9              | 115                |
| Q9CQR4           | <i>Acot13</i>   | Acyl-coenzyme     | High                             | 34           | 4          | 6      | 4                 | 140   | 15.2     | 8.82     | 205                  | 103.5              | 108.4              | 97.4               | 94.9               | 97.9               | 97.9               |
| Q6NXI6           | <i>Rprd2</i>    | Regulation of     | High                             | 2            | 2          | 2      | 2                 | 1469  | 156.5    | 7.59     | 37                   | 96.2               | 95.3               | 92.3               | 94.7               | 104.7              | 116.8              |
| B2RXS4           | <i>Plxnb2</i>   | Plexin-B2         | High                             | 8            | 11         | 15     | 11                | 1842  | 206.1    | 5.87     | 230                  | 109                | 99                 | 108                | 88.8               | 93.7               | 101.4              |
| Q80U70           | <i>Suz12</i>    | Polycomb          | Low                              | 3            | 1          | 1      | 1                 | 741   | 83       | 8.81     | 0                    | 104.4              | 96                 | 108.9              | 94.1               | 96                 | 100.6              |
| Q9DCL9           | <i>Paics</i>    | Multifunctional   | High                             | 28           | 10         | 16     | 10                | 425   | 47       | 7.23     | 291                  | 102.7              | 101.6              | 105.6              | 95                 | 98.1               | 97.1               |
| Q91WD5           | <i>Ndufs2</i>   | NADH              | High                             | 51           | 17         | 50     | 17                | 463   | 52.6     | 6.99     | 743                  | 97.4               | 103.4              | 92.3               | 105.5              | 101.4              | 100                |
| Q91WM1           | <i>Strbp</i>    | Spermatid         | High                             | 16           | 11         | 14     | 7                 | 672   | 73.7     | 8.72     | 103                  | 102                | 104.3              | 89                 | 104.2              | 100.7              | 99.8               |
| Q9ERZ3           | <i>Chrm3</i>    | Muscarinic        | High                             | 2            | 1          | 2      | 1                 | 589   | 66.2     | 9.07     | 33                   | 104.6              | 98.8               | 89.3               | 105.3              | 102.9              | 99.1               |
| P70677           | <i>Casp3</i>    | Caspase-3         | High                             | 8            | 2          | 2      | 2                 | 277   | 31.5     | 6.92     | 54                   | 99.1               | 97.5               | 103.7              | 95.1               | 103                | 101.6              |
| Q9ERD8           | <i>Parvg</i>    | Gamma-parvin      | Medium                           | 4            | 1          | 1      | 1                 | 331   | 37.6     | 5.66     | 30                   | 136.5              | 98.5               | 132.9              | 60.8               | 80.7               | 90.5               |
| Q922V4           | <i>Plrg1</i>    | Pleiotropic       | High                             | 3            | 2          | 2      | 2                 | 513   | 56.9     | 9.17     | 43                   | 97.3               | 101.4              | 111.5              | 86.1               | 99.3               | 104.4              |
| P18524           |                 | Ig heavy chain V  | Medium                           | 18           | 1          | 1      | 1                 | 117   | 12.9     | 9.29     | 0                    | 95.2               | 106.2              | 87.1               | 123                | 94.3               | 94.2               |
| Q9QZD8           | <i>Slc25a10</i> | Mitochondrial     | High                             | 28           | 7          | 8      | 7                 | 287   | 31.7     | 9.32     | 90                   | 101                | 102.3              | 103.1              | 100.1              | 98.5               | 94.9               |

|        |                |                    |        |    |    |     |    |      |       |       |      |       |       |       |       |       |       |
|--------|----------------|--------------------|--------|----|----|-----|----|------|-------|-------|------|-------|-------|-------|-------|-------|-------|
| Q91ZP9 | <i>Necab2</i>  | N-terminal EF-     | High   | 15 | 5  | 7   | 5  | 389  | 43.4  | 5.3   | 75   | 97.4  | 92.9  | 111.9 | 88.8  | 104.3 | 104.9 |
| Q9CYR0 | <i>Ssbp1</i>   | Single-stranded    | High   | 21 | 3  | 4   | 3  | 152  | 17.3  | 9.92  | 50   | 124.6 | 96.5  | 125.6 | 86.5  | 87.7  | 79.2  |
| Q68FM6 | <i>Elfn2</i>   | Protein            | High   | 8  | 6  | 6   | 5  | 823  | 90    | 7.52  | 30   | 101.2 | 97.6  | 101.1 | 98.1  | 102   | 99.9  |
| Q01063 | <i>Pde4d</i>   | cAMP-specific      | High   | 9  | 6  | 10  | 3  | 747  | 84.5  | 4.91  | 108  | 94.6  | 103   | 83.6  | 111   | 107.9 | 100   |
| Q922E4 | <i>Pcyt2</i>   | Ethanolamine-      | High   | 18 | 6  | 8   | 6  | 404  | 45.2  | 6.58  | 112  | 95.3  | 102.7 | 93.2  | 103.1 | 101.1 | 104.5 |
| P49722 | <i>Pσμα2</i>   | Proteasome         | High   | 43 | 6  | 10  | 6  | 234  | 25.9  | 7.43  | 294  | 95.7  | 94.8  | 99.5  | 98.7  | 104.2 | 107.2 |
| P20029 | <i>Hspa5</i>   | Endoplasmic        | High   | 54 | 35 | 102 | 32 | 655  | 72.4  | 5.16  | 1755 | 103.7 | 101.7 | 115.3 | 89.9  | 94.2  | 95.2  |
| Q8BHE8 | <i>Maip1</i>   | m-AAA              | High   | 14 | 4  | 6   | 3  | 291  | 33    | 9.14  | 77   | 97    | 107.9 | 98.1  | 121   | 91.8  | 84.2  |
| Q9ERN0 | <i>Scamp2</i>  | Secretory          | High   | 6  | 1  | 1   | 1  | 329  | 36.4  | 6.32  | 69   |       |       |       |       |       |       |
| Q9D8S4 | <i>Rexo2</i>   | Oligoribonucleas   | High   | 12 | 3  | 4   | 3  | 237  | 26.7  | 7.15  | 84   | 98.1  | 107.8 | 103.6 | 95.5  | 101   | 94.1  |
| P61027 | <i>Rab10</i>   | Ras-related        | High   | 48 | 11 | 29  | 9  | 200  | 22.5  | 8.38  | 549  | 100.9 | 98.9  | 101.2 | 101.2 | 100.7 | 97.2  |
| Q6ZPR5 | <i>Smpd4</i>   | Sphingomyelin      | High   | 4  | 2  | 3   | 2  | 823  | 93.2  | 8.13  | 29   |       |       |       |       |       |       |
| Q9EST5 | <i>Anp32b</i>  | Acidic leucine-    | High   | 21 | 6  | 10  | 3  | 272  | 31.1  | 4.01  | 154  | 101   | 95.5  | 113   | 96.3  | 95.7  | 98.4  |
| Q8R3Q6 | <i>Ccdc58</i>  | Coiled-coil        | High   | 38 | 4  | 5   | 4  | 144  | 16.7  | 8.16  | 115  | 96.1  | 106.2 | 97.7  | 98.6  | 101.7 | 99.8  |
| Q7TQE6 | <i>Maco1</i>   | Macoilin           | High   | 2  | 1  | 2   | 1  | 664  | 76    | 9.07  | 57   | 97.5  | 97.1  | 94    | 103.1 | 99.8  | 108.4 |
| Q8R3N6 | <i>Thoc1</i>   | THO complex        | High   | 3  | 2  | 3   | 2  | 657  | 75.4  | 4.97  | 33   |       |       |       |       |       |       |
| P56399 | <i>Usp5</i>    | Ubiquitin          | High   | 39 | 25 | 45  | 25 | 858  | 95.8  | 5.01  | 852  | 98.7  | 98.7  | 97.2  | 100.8 | 103.8 | 100.8 |
| Q64727 | <i>Vcl</i>     | Vinculin           | High   | 40 | 35 | 49  | 35 | 1066 | 116.6 | 6     | 989  | 104.1 | 98.6  | 111.3 | 90.2  | 96.9  | 99    |
| Q8CIP5 | <i>Disp2</i>   | Protein            | Medium | 1  | 1  | 1   | 1  | 1345 | 147.8 | 6.76  | 0    | 95.9  | 96.8  | 113.1 | 100.9 | 89    | 104.4 |
| P11798 | <i>Camk2a</i>  | Calcium/calmod     | High   | 42 | 19 | 130 | 14 | 478  | 54.1  | 7.08  | 2459 | 94    | 97.9  | 83.6  | 111.8 | 106.6 | 106.1 |
| Q7M759 | <i>Abhd17b</i> | Alpha/beta         | High   | 7  | 1  | 1   | 1  | 288  | 32.2  | 6.29  | 37   | 93.5  | 85.6  | 100.6 | 113.9 | 98.7  | 107.7 |
| Q8BJD1 | <i>Ith5</i>    | Inter-alpha-       | Medium | 1  | 1  | 1   | 1  | 952  | 106.7 | 8.16  | 0    |       |       |       |       |       |       |
| Q3UGF1 | <i>Wdr19</i>   | WD repeat-         | Low    | 1  | 1  | 1   | 1  | 1341 | 151.4 | 6.57  | 0    |       |       |       |       |       |       |
| Q62318 | <i>Trim28</i>  | Transcription      | High   | 28 | 17 | 21  | 17 | 834  | 88.8  | 5.77  | 379  | 101.2 | 97    | 105.3 | 99    | 97.3  | 100.2 |
| P46735 | <i>Myo1b</i>   | Unconventional     | High   | 15 | 15 | 19  | 15 | 1107 | 128.5 | 9.26  | 257  | 94    | 102.1 | 84.8  | 108.9 | 104.5 | 105.8 |
| Q3TKY6 | <i>Cwc27</i>   | Spliceosome-       | High   | 3  | 1  | 1   | 1  | 469  | 53.5  | 5.53  | 29   | 98.1  | 102.4 | 103.5 | 93.5  | 104.8 | 97.8  |
| Q60739 | <i>Bag1</i>    | BAG family         | High   | 3  | 1  | 1   | 1  | 355  | 39.7  | 8.46  | 49   | 104.5 | 101.3 | 102.8 | 102.2 | 93.6  | 95.6  |
| Q8R3L2 | <i>Tcf25</i>   | Transcription      | Low    | 1  | 1  | 1   | 1  | 676  | 76.6  | 6.51  | 0    | 98.1  | 100.1 | 87    | 95.1  | 92.2  | 127.5 |
| Q8BGT1 | <i>Flrt3</i>   | Leucine-rich       | High   | 1  | 1  | 1   | 1  | 649  | 72.8  | 8.06  | 38   | 97.7  | 94.1  | 93.6  | 96.5  | 109   | 109.1 |
| O70325 | <i>Gpx4</i>    | Phospholipid       | High   | 39 | 7  | 12  | 7  | 197  | 22.2  | 8.46  | 198  | 100.8 | 104.3 | 99.7  | 97.5  | 99.9  | 97.9  |
| Q6P5B0 | <i>Rrp12</i>   | RRP12-like         | High   | 2  | 2  | 2   | 2  | 1295 | 143   | 8.91  | 46   | 116.5 | 97    | 107.1 | 77.4  | 115.3 | 86.8  |
| Q9D0M1 | <i>Prpsap1</i> | Phosphoribosyl     | High   | 40 | 11 | 18  | 8  | 356  | 39.4  | 7.2   | 243  | 98.4  | 103.7 | 95.9  | 100.3 | 99.8  | 101.9 |
| Q9WV92 | <i>Epb413</i>  | Band 4.1-like      | High   | 47 | 39 | 77  | 32 | 929  | 103.3 | 5.31  | 1491 | 97.7  | 103.7 | 90.4  | 103.6 | 103.1 | 101.5 |
| Q8BZW8 | <i>Nhlrc2</i>  | NHL repeat-        | High   | 2  | 2  | 2   | 2  | 725  | 78.4  | 5.54  | 19   | 96.8  | 95.2  | 111.7 | 90.5  | 97.3  | 108.5 |
| Q9Z1N5 | <i>Ddx39b</i>  | Spliceosome        | High   | 31 | 13 | 19  | 7  | 428  | 49    | 5.67  | 246  | 104.4 | 96.9  | 105.7 | 96.5  | 97.6  | 98.9  |
| Q61235 | <i>Sntb2</i>   | Beta-2-            | High   | 5  | 3  | 4   | 3  | 520  | 56.3  | 8.69  | 29   | 84.6  | 105.2 | 87.7  | 110.8 | 99.3  | 112.4 |
| Q6P1H6 | <i>Ankle2</i>  | Ankyrin repeat     | High   | 4  | 3  | 3   | 3  | 964  | 106.1 | 7.37  | 26   | 96.3  | 102.1 | 89.5  | 101.1 | 103.9 | 107.1 |
| Q922R8 | <i>Pdia6</i>   | Protein disulfide- | High   | 26 | 10 | 18  | 10 | 440  | 48.1  | 5.14  | 388  | 104.1 | 101.4 | 114   | 92.8  | 91.8  | 95.9  |
| Q8BVI5 | <i>Stx16</i>   | Syntaxin-16        | High   | 27 | 7  | 10  | 7  | 326  | 37.1  | 5.86  | 155  | 108.8 | 93.1  | 107.9 | 92.7  | 97.9  | 99.6  |
| Q9Z0P5 | <i>Twf2</i>    | Twinfilin-2        | High   | 47 | 13 | 21  | 12 | 349  | 39.4  | 6.8   | 386  | 99.1  | 101.3 | 95.2  | 102.8 | 100.9 | 100.7 |
| O09005 | <i>Degs1</i>   | Sphingolipid       | High   | 5  | 1  | 1   | 1  | 323  | 38.2  | 7.77  | 36   | 106.4 | 96.6  | 104.6 | 93.7  | 96.2  | 102.5 |
| Q8K183 | <i>Pdxk</i>    | Pyridoxal kinase   | High   | 46 | 13 | 21  | 13 | 312  | 35    | 6.29  | 480  | 98.9  | 98    | 99.6  | 97.8  | 105.4 | 100.3 |
| Q06138 | <i>Cab39</i>   | Calcium-binding    | High   | 42 | 15 | 22  | 15 | 341  | 39.8  | 6.89  | 294  | 98.4  | 103.1 | 93.5  | 103   | 101   | 101.1 |
| Q80U04 | <i>Pja2</i>    | E3 ubiquitin-      | High   | 5  | 3  | 3   | 3  | 707  | 77.9  | 4.44  | 41   | 100.6 | 102.8 | 93.9  | 100   | 99.5  | 103.3 |
| Q4VC33 | <i>Maea</i>    | E3 ubiquitin-      | High   | 4  | 2  | 2   | 2  | 396  | 45.3  | 8.69  | 44   | 95.9  | 90.5  | 103.5 | 104.5 | 102.9 | 102.6 |
| Q8CFV9 | <i>Rfk</i>     | Riboflavin kinase  | Medium | 6  | 1  | 1   | 1  | 155  | 17.4  | 7.55  | 0    |       |       |       |       |       |       |
| P09103 | <i>P4hb</i>    | Protein disulfide- | High   | 33 | 17 | 28  | 17 | 509  | 57    | 4.88  | 527  | 106.6 | 103.6 | 118.5 | 87.6  | 91    | 92.7  |
| Q9Z2Q6 | <i>Septin5</i> | Septin-5           | High   | 52 | 18 | 47  | 15 | 369  | 42.7  | 6.67  | 824  | 95.8  | 100.4 | 86.7  | 106.4 | 105.2 | 105.6 |
| Q9R0Q6 | <i>Arpc1a</i>  | Actin-related      | High   | 53 | 16 | 26  | 16 | 370  | 41.6  | 8.18  | 387  | 96    | 100.8 | 97.6  | 101.7 | 103.5 | 100.4 |
| P56382 | <i>Atp5f1e</i> | ATP synthase       | High   | 27 | 2  | 4   | 2  | 52   | 5.8   | 10.01 | 54   | 101   | 103   | 91.3  | 100.3 | 106.1 | 98.3  |
| P58404 | <i>Strn4</i>   | Striatin-4         | High   | 18 | 12 | 15  | 11 | 760  | 81.6  | 5.38  | 370  | 97.9  | 96.9  | 96.1  | 104   | 101.9 | 103.1 |
| P51437 | <i>Camp</i>    | Cathelicidin       | High   | 9  | 1  | 1   | 1  | 172  | 19.4  | 8.68  | 36   | 103.4 | 98.8  | 129.2 | 93.2  | 88.2  | 87.2  |
| Q62443 | <i>Nptx1</i>   | Neuronal           | High   | 32 | 13 | 20  | 13 | 432  | 47.1  | 6.44  | 225  | 106.6 | 103   | 109.3 | 95.5  | 93.1  | 92.6  |
| Q8C754 | <i>Vps52</i>   | Vacuolar protein   | High   | 21 | 11 | 14  | 11 | 723  | 82    | 5.9   | 237  | 94.4  | 96.3  | 95.3  | 104.1 | 103.8 | 106   |
| Q8R2Y2 | <i>Mcam</i>    | Cell surface       | High   | 6  | 3  | 3   | 3  | 648  | 71.5  | 5.83  | 65   | 90.2  | 103.2 | 101.3 | 104   | 97    | 104.3 |
| Q3UNZ8 | <i>Cryz12</i>  | Quinone            | High   | 6  | 2  | 2   | 2  | 350  | 37.8  | 8.9   | 32   | 104.8 | 97.9  | 118.9 | 94.5  | 87.3  | 96.6  |
| S4R1M9 | <i>Osbpl10</i> | Oxysterol-         | High   | 3  | 2  | 3   | 1  | 766  | 83.8  | 8.28  | 23   | 99.4  | 106   | 95.8  | 98.8  | 95    | 105   |
| Q60625 | <i>Icam5</i>   | Intercellular      | High   | 19 | 14 | 21  | 14 | 917  | 96.9  | 6.32  | 311  | 93.5  | 96.1  | 101.2 | 102.3 | 103.2 | 103.7 |
| Q9CX60 | <i>Lbh</i>     | Protein LBH        | High   | 18 | 1  | 1   | 1  | 105  | 12.1  | 4.31  | 39   | 98.1  | 101.1 | 93.4  | 99.7  | 95.3  | 112.4 |
| Q7M729 | <i>Scn4b</i>   | Sodium channel     | High   | 4  | 1  | 1   | 1  | 228  | 25.2  | 8.82  | 50   | 85.6  | 136.2 | 53.8  | 106.2 | 107.5 | 110.6 |
| P61759 | <i>Vbp1</i>    | Prefoldin subunit  | High   | 39 | 8  | 12  | 8  | 196  | 22.4  | 6.28  | 251  | 97.5  | 97.2  | 100.9 | 100.2 | 99.9  | 104.3 |
| Q3TCH7 | <i>Cul4a</i>   | Cullin-4A          | High   | 13 | 10 | 10  | 3  | 759  | 87.7  | 8.35  | 140  | 99.6  | 92.3  | 99.8  | 99.1  | 101.7 | 107.5 |
| Q9Z0V7 | <i>Timm17b</i> | Mitochondrial      | High   | 26 | 3  | 3   | 3  | 172  | 18.3  | 9.03  | 48   | 96.8  | 102.7 | 93.4  | 105.8 | 102.1 | 99.2  |
| O35639 | <i>Anxa3</i>   | Annexin A3         | High   | 49 | 14 | 20  | 13 | 323  | 36.4  | 5.76  | 277  | 115   | 105.1 | 130.8 | 80.6  | 82.9  | 85.5  |
| P01898 | <i>H2-Q10</i>  | H-2 class I        | High   | 20 | 5  | 7   | 3  | 325  | 37.2  | 5.25  | 110  | 139   | 80.2  | 151.5 | 76.6  | 76    | 76.7  |
| Q9JMC3 | <i>Dnaja4</i>  | DnaJ homolog       | High   | 22 | 7  | 8   | 7  | 397  | 44.9  | 7.58  | 53   | 94.6  | 100   | 99.7  | 103.2 | 96.8  | 105.6 |
| Q67BT3 | <i>Slc13a5</i> | Solute carrier     | High   | 4  | 2  | 2   | 2  | 572  | 63.8  | 7.64  | 18   | 95.8  | 92.5  | 84.4  | 113.9 | 108.4 | 105   |
| Q9CQF8 | <i>Mrpl57</i>  | Ribosomal          | Medium | 8  | 1  | 1   | 1  | 102  | 11.9  | 10.15 | 25   | 95.6  | 107.8 | 94.8  | 103.6 | 100   | 98.1  |

|         |                 |                   |        |    |    |     |    |       |        |      |      |       |       |       |       |       |       |
|---------|-----------------|-------------------|--------|----|----|-----|----|-------|--------|------|------|-------|-------|-------|-------|-------|-------|
| Q8BMD8  | <i>Slc25a24</i> | Calcium-binding   | High   | 3  | 1  | 1   | 1  | 475   | 52.9   | 7.43 | 42   | 94.2  | 93.8  | 102.5 | 103.4 | 105.2 | 100.9 |
| Q8BYN5  | <i>Fsd1l</i>    | FSD1-like         | High   | 14 | 6  | 6   | 6  | 507   | 56.9   | 6.7  | 107  | 92.7  | 98.1  | 93.8  | 101.1 | 100.9 | 113.3 |
| A2ASS6  | <i>Ttn</i>      | Titin OS=Mus      | High   | 0  | 4  | 4   | 3  | 35213 | 3904.1 | 6.2  | 18   | 94.2  | 99.3  | 85.5  | 120.7 | 109.8 | 90.5  |
| P97952  | <i>Scn1b</i>    | Sodium channel    | High   | 29 | 5  | 7   | 5  | 218   | 24.6   | 4.83 | 142  | 100.3 | 106.4 | 90.6  | 104.7 | 102.3 | 95.8  |
| Q61466  | <i>Smarca1</i>  | SWI/SNF-related   | High   | 4  | 2  | 2   | 2  | 515   | 58.2   | 9.25 | 15   | 102.6 | 93.8  | 97.1  | 102.8 | 100.4 | 103.3 |
| O88745  | <i>Scrg1</i>    | Scrapie-          | High   | 21 | 2  | 2   | 2  | 98    | 11.2   | 7.91 | 71   | 92.7  | 105.9 | 87.5  | 121   | 94.7  | 98.2  |
| Q91VK1  | <i>Bzw2</i>     | Basic leucine     | High   | 13 | 5  | 6   | 3  | 419   | 48     | 6.68 | 159  | 98    | 102.2 | 101.1 | 102.1 | 99.5  | 97.1  |
| Q9Z321  | <i>Top3b</i>    | DNA               | Medium | 2  | 1  | 1   | 1  | 862   | 96.9   | 7.93 | 21   |       |       |       |       |       |       |
| P06909  | <i>Cfh</i>      | Complement        | High   | 18 | 17 | 18  | 17 | 1234  | 139    | 6.99 | 199  | 159.7 | 77    | 181   | 59.7  | 61.8  | 60.9  |
| Q922B2  | <i>Dars1</i>    | Aspartate--tRNA   | High   | 47 | 20 | 29  | 20 | 501   | 57.1   | 6.49 | 328  | 99.6  | 99.8  | 107.7 | 97.5  | 96.9  | 98.4  |
| Q8BSS9  | <i>Ppfa2</i>    | Liprin-alpha-2    | High   | 19 | 19 | 24  | 18 | 1257  | 143.1  | 6.11 | 336  | 92.4  | 98    | 91.6  | 99.1  | 104   | 114.9 |
| Q810A7  | <i>Ddx42</i>    | ATP-dependent     | High   | 11 | 7  | 8   | 7  | 929   | 101.9  | 6.98 | 59   | 100.3 | 96.2  | 98    | 98.7  | 101.4 | 105.4 |
| Q77TSF4 | <i>Lrrc75a</i>  | Leucine-rich      | Low    | 3  | 1  | 1   | 1  | 339   | 37.6   | 8.76 | 0    | 99    | 102.9 | 85.3  | 93.2  | 95.3  | 124.4 |
| Q8R344  | <i>Ccdc12</i>   | Coiled-coil       | Medium | 4  | 1  | 1   | 1  | 166   | 18.9   | 7.21 | 0    | 99.9  | 104.8 | 93    | 100.3 | 100.7 | 101.3 |
| Q3V3N7  | <i>Bbs1</i>     | Bardet-Biedl      | High   | 3  | 1  | 1   | 1  | 593   | 65.1   | 8.54 | 24   |       |       |       |       |       |       |
| P70349  | <i>Hint1</i>    | Histidine triad   | High   | 40 | 4  | 9   | 4  | 126   | 13.8   | 6.87 | 184  | 101   | 104.3 | 96.8  | 100.1 | 98.8  | 99    |
| O08579  | <i>Emd</i>      | Emerin OS=Mus     | High   | 24 | 5  | 5   | 5  | 259   | 29.4   | 5.01 | 112  | 99.9  | 97.5  | 96.7  | 99.3  | 102.7 | 104   |
| P63154  | <i>Crnk1</i>    | Crooked neck-     | Medium | 2  | 1  | 1   | 1  | 690   | 83.4   | 6.93 | 15   | 106.1 | 106.3 | 97.4  | 98.6  | 93    | 98.6  |
| P03995  | <i>Gfap</i>     | Glial fibrillary  | High   | 71 | 33 | 73  | 31 | 430   | 49.9   | 5.34 | 1291 | 143.7 | 114.6 | 182.7 | 49    | 53.9  | 56.2  |
| P52480  | <i>Pkm</i>      | Pyruvate kinase   | High   | 70 | 35 | 203 | 34 | 531   | 57.8   | 7.47 | 4596 | 100.5 | 102   | 101.6 | 97.1  | 99.9  | 98.9  |
| Q9CQV4  | <i>Retreg3</i>  | Reticulophagy     | High   | 5  | 2  | 2   | 2  | 466   | 51.6   | 4.97 | 61   | 95.6  | 91.2  | 93.2  | 103.8 | 106.6 | 109.7 |
| Q9ES28  | <i>Arhgef7</i>  | Rho guanine       | High   | 22 | 15 | 19  | 13 | 862   | 97     | 6.8  | 387  | 94.6  | 98.3  | 91.7  | 105.5 | 102.3 | 107.6 |
| Q9CQX5  | <i>Cldnd1</i>   | Claudin domain-   | High   | 12 | 3  | 4   | 3  | 253   | 28.6   | 6.1  | 88   | 91.1  | 106.1 | 88.5  | 101.1 | 105.6 | 107.5 |
| Q64434  | <i>Ptk6</i>     | Protein-tyrosine  | Low    | 4  | 1  | 1   | 1  | 451   | 51.9   | 6.9  | 0    |       |       |       |       |       |       |
| Q99J77  | <i>Nans</i>     | Sialic acid       | High   | 22 | 6  | 8   | 6  | 359   | 40     | 7.06 | 131  | 94.3  | 97.9  | 99.4  | 101.2 | 102.6 | 104.6 |
| Q03517  | <i>Scg2</i>     | Secretogranin-2   | High   | 35 | 17 | 20  | 17 | 617   | 70.6   | 4.75 | 210  | 99.2  | 97.4  | 105.9 | 96.9  | 102.1 | 98.5  |
| Q61937  | <i>Npm1</i>     | Nucleophosmin     | High   | 42 | 12 | 23  | 12 | 292   | 32.5   | 4.77 | 385  | 101.7 | 98.6  | 104   | 97.2  | 98.3  | 100.3 |
| Q9D9H8  |                 | UPF0565 protein   | Medium | 2  | 1  | 1   | 1  | 365   | 41.7   | 7.87 | 30   | 102.6 | 105.1 | 92.4  | 99.1  | 103.4 | 97.4  |
| Q91WQ3  | <i>Yars1</i>    | Tyrosine--tRNA    | High   | 42 | 22 | 29  | 22 | 528   | 59.1   | 7.01 | 470  | 99.5  | 101.9 | 96.7  | 101.7 | 99.8  | 100.3 |
| Q8C3F2  | <i>Fam120c</i>  | Constitutive      | High   | 7  | 7  | 8   | 6  | 1091  | 119.6  | 8.46 | 68   | 102.5 | 101.7 | 107.7 | 97.4  | 92.4  | 98.3  |
| Q9CQB5  | <i>Cisd2</i>    | CDGSH iron-       | High   | 31 | 4  | 7   | 4  | 135   | 15.2   | 9.51 | 142  | 96.2  | 104.7 | 96.7  | 101.6 | 104.9 | 95.9  |
| Q9JI46  | <i>Nudt3</i>    | Diphosphoinosit   | High   | 33 | 4  | 5   | 4  | 168   | 19     | 6.34 | 76   | 96.1  | 105.1 | 93    | 101.4 | 102.9 | 101.5 |
| Q8BL97  | <i>Srsf7</i>    | Serine/arginine-  | High   | 19 | 5  | 13  | 4  | 267   | 30.8   | 11.9 | 225  | 101.5 | 100.4 | 104.5 | 98.6  | 97.7  | 97.3  |
| P31316  | <i>Gsx2</i>     | GS homeobox 2     | Low    | 3  | 1  | 1   | 1  | 305   | 32.1   | 8.97 | 0    | 111.2 | 64.1  | 66.3  | 74.9  | 116.9 | 166.6 |
| Q9D338  | <i>Mrp19</i>    | 39S ribosomal     | High   | 7  | 2  | 3   | 2  | 292   | 33.6   | 9.44 | 62   | 90.7  | 95.5  | 93.3  | 104.5 | 113.5 | 102.6 |
| P49710  | <i>Hcls1</i>    | Hematopoietic     | High   | 9  | 4  | 5   | 4  | 486   | 54.2   | 4.84 | 69   | 129.9 | 105.2 | 145.9 | 73.9  | 73.4  | 71.7  |
| Q3UI43  | <i>Babam1</i>   | BRISC and         | High   | 14 | 4  | 4   | 4  | 333   | 36.8   | 4.55 | 68   | 99.7  | 93.6  | 102   | 108   | 100.8 | 95.9  |
| Q9CQN3  | <i>Tomm6</i>    | Mitochondrial     | High   | 19 | 1  | 2   | 1  | 74    | 7.9    | 4.89 | 74   | 101.1 | 93    | 105.2 | 100.4 | 90.6  | 109.6 |
| B6A8R8  | <i>Tarm1</i>    | T-cell-           | Low    | 3  | 1  | 1   | 1  | 288   | 31.4   | 8.43 | 0    | 90.1  | 107.3 | 100.4 | 100.8 | 103.5 | 98    |
| P03903  | <i>Mtnd4l</i>   | NADH-             | High   | 18 | 1  | 1   | 1  | 98    | 10.6   | 5.71 | 29   | 108.9 | 101.2 | 89.5  | 99.4  | 92.2  | 108.7 |
| O35127  | <i>Grcc10</i>   | Protein C10       | High   | 49 | 4  | 5   | 4  | 126   | 13.2   | 5.14 | 164  | 103.8 | 95.7  | 105.8 | 105.1 | 92.5  | 97.1  |
| Q9CVB6  | <i>Arpc2</i>    | Actin-related     | High   | 43 | 14 | 30  | 14 | 300   | 34.3   | 7.36 | 468  | 99.2  | 101.2 | 99.8  | 100.9 | 101   | 97.9  |
| Q9D5T0  | <i>Atad1</i>    | ATPase family     | High   | 22 | 6  | 9   | 6  | 361   | 40.7   | 6.9  | 215  | 109.2 | 99.9  | 102.1 | 100.2 | 90.3  | 98.3  |
| Q9CQR2  | <i>Rps21</i>    | 40S ribosomal     | High   | 67 | 6  | 8   | 6  | 83    | 9.1    | 8.51 | 221  | 98    | 106.7 | 106.3 | 90.7  | 96.2  | 102   |
| Q8BG94  | <i>Comm7</i>    | COMM domain-      | Medium | 6  | 1  | 1   | 1  | 200   | 22.6   | 5.94 | 23   | 91.7  | 108.3 | 97.3  | 100.2 | 101.5 | 101   |
| E9Q401  | <i>Ryr2</i>     | Ryanodine         | High   | 18 | 70 | 93  | 70 | 4966  | 564.5  | 6.09 | 1412 | 98.2  | 104.6 | 94.7  | 104.1 | 98.7  | 99.7  |
| Q6KCD5  | <i>Nipbl</i>    | Nipped-B-like     | Low    | 1  | 1  | 1   | 1  | 2798  | 315.3  | 7.91 | 21   |       |       |       |       |       |       |
| Q3UHB1  | <i>Nt5dc3</i>   | 5'-nucleotidase   | High   | 29 | 15 | 22  | 15 | 546   | 63.1   | 8.56 | 269  | 94.2  | 96    | 98.2  | 103.7 | 105.9 | 102   |
| Q9JII6  | <i>Akr1a1</i>   | Aldo-keto         | High   | 51 | 15 | 24  | 14 | 325   | 36.6   | 7.39 | 378  | 98.3  | 99.4  | 95    | 103.4 | 102   | 102   |
| Q8K199  | <i>Cmc2</i>     | COX assembly      | Medium | 13 | 1  | 1   | 1  | 79    | 9.4    | 8.24 | 16   | 101.2 | 92.4  | 120.6 | 100.4 | 83.6  | 101.8 |
| Q9DCP2  | <i>Slc38a3</i>  | Sodium-coupled    | High   | 11 | 5  | 6   | 5  | 505   | 55.6   | 7.09 | 108  | 100.7 | 110   | 101.3 | 100.1 | 94.1  | 93.8  |
| Q8VDQ8  | <i>Sirt2</i>    | NAD-dependent     | High   | 52 | 17 | 27  | 17 | 389   | 43.2   | 5.35 | 412  | 96.5  | 114.7 | 95.1  | 97.6  | 98.4  | 97.7  |
| P29387  | <i>Gnb4</i>     | Guanine           | High   | 35 | 10 | 28  | 6  | 340   | 37.4   | 6.16 | 419  | 93.4  | 94    | 100.5 | 100.6 | 98.7  | 112.8 |
| Q9D6E4  | <i>Ttc9b</i>    | Tetratricopeptide | High   | 22 | 4  | 4   | 4  | 239   | 25.9   | 9.48 | 65   | 97    | 88.6  | 93.3  | 105.3 | 106.2 | 109.5 |
| Q99LF4  | <i>Rtcb</i>     | RNA-splicing      | High   | 42 | 16 | 23  | 16 | 505   | 55.2   | 7.23 | 369  | 101.2 | 100.6 | 98    | 102   | 98.4  | 99.8  |
| P51830  | <i>Adcy9</i>    | Adenylate         | High   | 9  | 12 | 14  | 12 | 1353  | 150.9  | 7.21 | 189  | 99.3  | 105.3 | 97.6  | 101.7 | 98    | 98.1  |
| P16388  | <i>Kcna1</i>    | Potassium         | High   | 17 | 8  | 11  | 5  | 495   | 56.4   | 5.14 | 196  | 93.9  | 113.4 | 82.7  | 104.8 | 96.5  | 108.7 |
| A8Y5H7  | <i>Sec14l1</i>  | SEC14-like        | High   | 7  | 4  | 4   | 4  | 715   | 81.2   | 6.34 | 33   | 99.5  | 97.1  | 95.1  | 103.1 | 102   | 103.2 |
| O88351  | <i>Ikbkb</i>    | Inhibitor of      | Low    | 1  | 1  | 1   | 1  | 757   | 86.6   | 6.4  | 0    |       |       |       |       |       |       |
| Q61205  | <i>Pafah1b3</i> | Platelet-         | High   | 7  | 2  | 2   | 2  | 232   | 25.8   | 6.93 | 37   |       |       |       |       |       |       |
| Q3U3R4  | <i>Lmf1</i>     | Lipase            | High   | 7  | 3  | 3   | 3  | 574   | 65.8   | 9.29 | 68   | 96.3  | 101.8 | 102.9 | 96.1  | 100.3 | 102.5 |
| Q9DCL9  | <i>Mrp32</i>    | 39S ribosomal     | Medium | 10 | 1  | 1   | 1  | 187   | 21.7   | 9.7  | 27   | 87.3  | 108   | 95.5  | 103.9 | 105.7 | 99.6  |
| Q9DCL8  | <i>Ppp1r2</i>   | Protein           | High   | 25 | 3  | 4   | 3  | 206   | 23.1   | 4.83 | 29   | 100.8 | 106.3 | 91.9  | 91.7  | 109.6 | 99.7  |
| Q68FF0  | <i>Kiaa1841</i> | Uncharacterized   | Low    | 1  | 1  | 1   | 1  | 718   | 81.9   | 6.62 | 0    | 92.3  | 107.3 | 90.7  | 114.9 | 99    | 95.8  |
| A2ANU3  | <i>Syndig1</i>  | Synapse           | Medium | 4  | 1  | 1   | 1  | 258   | 28.4   | 4.88 | 23   | 93    | 98.7  | 83.7  | 108.1 | 103.2 | 113.4 |
| Q3V132  | <i>Slc25a31</i> | ADP/ATP           | High   | 12 | 4  | 9   | 1  | 320   | 35.2   | 9.58 | 126  | 104   | 102.1 | 83.4  | 102.5 | 104.6 | 103.4 |
| P43024  | <i>Cox6a1</i>   | Cytochrome c      | High   | 41 | 2  | 2   | 2  | 111   | 12.3   | 9.98 | 27   | 106.4 | 96.5  | 106.2 | 91.4  | 99.1  | 100.4 |
| Q6NSR8  | <i>Npepl1</i>   | Probable          | High   | 9  | 3  | 4   | 3  | 524   | 55.9   | 6.84 | 51   | 108.4 | 109.3 | 113   | 95.2  | 85.6  | 88.4  |

|        |                 |                   |        |    |     |     |    |      |       |       |      |       |       |       |       |       |       |
|--------|-----------------|-------------------|--------|----|-----|-----|----|------|-------|-------|------|-------|-------|-------|-------|-------|-------|
| Q9CZ82 | <i>Med18</i>    | Mediator of RNA   | Medium | 7  | 1   | 1   | 1  | 208  | 23.6  | 6.54  | 0    | 110.6 | 91.7  | 107   | 99.9  | 96.9  | 94    |
| Q5XKN4 | <i>Jagn1</i>    | Protein jagunal   | High   | 13 | 2   | 2   | 2  | 183  | 21.1  | 9.8   | 16   | 96.5  | 103   | 104.2 | 108.7 | 89.7  | 98    |
| Q9JKS5 | <i>Habp4</i>    | Intracellular     | High   | 18 | 6   | 6   | 6  | 411  | 45.9  | 6.84  | 77   | 100.7 | 97.2  | 103.5 | 99.9  | 99.6  | 99    |
| Q9WU84 | <i>Ccs</i>      | Copper            | High   | 8  | 2   | 2   | 2  | 274  | 28.9  | 6.1   | 45   | 101.6 | 103.8 | 89.4  | 100.3 | 104.5 | 100.5 |
| Q9EP72 | <i>Emc7</i>     | ER membrane       | High   | 12 | 2   | 2   | 2  | 241  | 26.3  | 9.23  | 55   | 100.3 | 101.1 | 100.3 | 95.7  | 99.8  | 102.7 |
| Q8C9H6 | <i>Strip2</i>   | Striatin-         | High   | 5  | 4   | 5   | 2  | 844  | 96.2  | 5.77  | 67   | 80.9  | 113.6 | 96.7  | 89    | 111.4 | 108.4 |
| Q8BGZ2 | <i>Fam168a</i>  | Protein           | Medium | 7  | 1   | 1   | 1  | 244  | 26.2  | 8.98  | 0    | 106.7 | 94.8  | 90.3  | 104.5 | 99.5  | 104.2 |
| Q8CJ61 | <i>Cmtm4</i>    | CKLF-like         | Medium | 5  | 1   | 1   | 1  | 208  | 22.9  | 5.59  | 0    | 92.2  | 97.7  | 87.5  | 102.3 | 110.1 | 110.3 |
| Q99MR6 | <i>Srrt</i>     | Serrate RNA       | High   | 13 | 9   | 11  | 9  | 875  | 100.4 | 5.97  | 207  | 101.5 | 97.3  | 103.1 | 99.2  | 101.3 | 97.6  |
| Q8BLB8 | <i>Ankrd34c</i> | Ankyrin repeat    | Medium | 2  | 1   | 1   | 1  | 534  | 58.1  | 9.17  | 0    |       |       |       |       |       |       |
| Q99J09 | <i>Wdr77</i>    | Methylosome       | High   | 8  | 2   | 2   | 2  | 342  | 36.9  | 5.27  | 42   | 104.4 | 95    | 98.7  | 91.7  | 96.2  | 114   |
| Q8K004 | <i>Spata2</i>   | Spermatogenesi    | High   | 3  | 1   | 2   | 1  | 515  | 57.8  | 8.63  | 32   | 95.6  | 99.4  | 97.6  | 92.9  | 98.3  | 116.3 |
| P28652 | <i>Camk2b</i>   | Calcium/calmod    | High   | 45 | 18  | 108 | 11 | 542  | 60.4  | 7.28  | 1917 | 95.5  | 98    | 95.6  | 104   | 104.4 | 102.4 |
| P62484 | <i>Abi2</i>     | Abl interactor 2  | High   | 26 | 9   | 14  | 7  | 446  | 49.4  | 6.01  | 201  | 97.8  | 94.1  | 95.8  | 103.6 | 107   | 101.8 |
| Q9DCS2 | <i>Mettl26</i>  | Methyltransferas  | High   | 21 | 4   | 7   | 4  | 204  | 22.7  | 6.52  | 191  | 95.8  | 96.9  | 91.5  | 103.7 | 106.9 | 105.3 |
| E9QAT4 | <i>Sec16a</i>   | Protein transport | High   | 3  | 4   | 4   | 4  | 2357 | 254   | 5.81  | 60   | 100.4 | 102   | 93.6  | 97.2  | 99.3  | 107.6 |
| Q8BL99 | <i>Dop1a</i>    | Protein dopey-1   | High   | 1  | 3   | 4   | 2  | 2399 | 269.1 | 6.24  | 75   | 129.7 | 96.8  | 125.8 | 76.7  | 87.7  | 83.3  |
| Q9DC71 | <i>Mrps15</i>   | 28S ribosomal     | High   | 14 | 4   | 4   | 4  | 258  | 29.4  | 10.13 | 35   | 100.4 | 100.6 | 93.3  | 100.4 | 105.4 | 99.8  |
| Q8BHL5 | <i>Elmo2</i>    | Engulfment and    | High   | 17 | 9   | 15  | 7  | 732  | 83.8  | 5.95  | 234  | 97.8  | 97.3  | 101.1 | 93.9  | 107   | 102.9 |
| Q9EPE9 | <i>Atp13a1</i>  | Manganese-        | High   | 6  | 6   | 7   | 6  | 1200 | 132.3 | 8.03  | 85   | 96.4  | 93.1  | 100   | 93.6  | 101.1 | 115.8 |
| Q8CFI5 | <i>Pars2</i>    | Probable proline- | High   | 13 | 4   | 4   | 4  | 475  | 53.5  | 7.84  | 83   | 92    | 96.7  | 95.2  | 107.4 | 100.3 | 108.5 |
| Q8BL48 | <i>Unk</i>      | RING finger       | High   | 3  | 1   | 1   | 1  | 810  | 88    | 6.87  | 17   | 89.7  | 100.2 | 91.6  | 111   | 108.6 | 98.8  |
| Q8JZR6 | <i>Slc4a8</i>   | Electroneutral    | High   | 9  | 8   | 11  | 5  | 1089 | 122.3 | 6.6   | 185  | 97.6  | 104.6 | 88.6  | 112.3 | 102.3 | 94.6  |
| P39053 | <i>Dnm1</i>     | Dynamin-1         | High   | 54 | 45  | 173 | 33 | 867  | 97.7  | 7.74  | 3130 | 95.8  | 100.5 | 88.6  | 104.4 | 106.3 | 104.4 |
| P52479 | <i>Usp10</i>    | Ubiquitin         | High   | 6  | 4   | 6   | 4  | 792  | 87    | 5.17  | 58   | 99.8  | 101.3 | 91.1  | 102.1 | 102.9 | 102.8 |
| Q91VK4 | <i>Itm2c</i>    | Integral          | High   | 35 | 6   | 6   | 6  | 269  | 30.5  | 8.59  | 139  | 101   | 96.2  | 103.6 | 101   | 95.5  | 102.7 |
| Q80XQ2 | <i>Tbc1d5</i>   | TBC1 domain       | High   | 3  | 2   | 2   | 2  | 815  | 91.8  | 6.79  | 20   | 96.5  | 93.9  | 107   | 103.4 | 96.3  | 102.9 |
| Q6Q477 | <i>Atp2b4</i>   | Plasma            | High   | 29 | 31  | 94  | 18 | 1205 | 133   | 6.13  | 1825 | 98.4  | 86.9  | 100.7 | 101.1 | 107.5 | 105.5 |
| Q9D061 | <i>Acbd6</i>    | Acyl-CoA-         | High   | 14 | 3   | 3   | 3  | 282  | 30.9  | 5.11  | 48   | 94.1  | 103.7 | 90.9  | 102.3 | 105.3 | 103.8 |
| Q60668 | <i>Hnmpd</i>    | Heterogeneous     | High   | 19 | 6   | 16  | 5  | 355  | 38.3  | 7.81  | 445  | 98.3  | 94.8  | 98.4  | 104.4 | 102.9 | 101.2 |
| Q99P31 | <i>Hspbp1</i>   | Hsp70-binding     | High   | 11 | 4   | 4   | 4  | 357  | 39.1  | 5.36  | 75   | 98    | 100.3 | 97.5  | 97.9  | 100.1 | 106.2 |
| Q61029 | <i>Tmpo</i>     | Lamina-           | High   | 23 | 7   | 8   | 7  | 452  | 50.3  | 9.45  | 125  | 103.5 | 100.3 | 105.5 | 93.7  | 98.5  | 98.5  |
| Q91XU0 | <i>Wrnip1</i>   | ATPase            | High   | 3  | 2   | 2   | 2  | 660  | 71.7  | 6.18  | 30   | 94.6  | 111.3 | 77.4  | 108.2 | 107.3 | 101.3 |
| P62821 | <i>Rab1A</i>    | Ras-related       | High   | 81 | 15  | 57  | 8  | 205  | 22.7  | 6.21  | 1419 | 97.6  | 99.2  | 92.9  | 101.4 | 105.7 | 103.2 |
| Q8VE70 | <i>Pdcd10</i>   | Programmed cell   | High   | 22 | 3   | 3   | 3  | 212  | 24.7  | 8.19  | 73   | 102.1 | 105.3 | 100.9 | 97.9  | 94    | 99.8  |
| P84086 | <i>Cplx2</i>    | Complexin-2       | High   | 53 | 5   | 19  | 3  | 134  | 15.4  | 5.08  | 383  | 97.6  | 95.9  | 95.8  | 105.8 | 104   | 100.9 |
| P03921 | <i>MtnD5</i>    | NADH-             | High   | 14 | 6   | 9   | 6  | 607  | 68.4  | 9.03  | 154  | 96.8  | 107   | 94.2  | 107.5 | 101.6 | 92.9  |
| P39429 | <i>Traf2</i>    | TNF receptor-     | Medium | 2  | 1   | 1   | 1  | 501  | 56    | 6.96  | 25   | 86.9  | 108.9 | 87.7  | 79.9  | 103.5 | 133.2 |
| Q9EQQ9 | <i>Oga</i>      | Protein O-        | High   | 20 | 13  | 17  | 13 | 916  | 103.1 | 4.92  | 384  | 97.6  | 98.7  | 101.4 | 96.8  | 96.9  | 108.7 |
| Q64737 | <i>Gart</i>     | Trifunctional     | High   | 16 | 12  | 13  | 12 | 1010 | 107.4 | 6.68  | 227  | 101.1 | 105.1 | 100.9 | 98.3  | 98.2  | 96.3  |
| Q9CXI5 | <i>Manf</i>     | Mesencephalic     | High   | 27 | 4   | 6   | 4  | 179  | 20.4  | 8.07  | 126  | 100.7 | 104.4 | 119.9 | 91.6  | 87.6  | 95.7  |
| Q8BFY9 | <i>Tnpo1</i>    | Transportin-1     | High   | 12 | 10  | 13  | 4  | 898  | 102.3 | 4.98  | 176  | 107   | 105.4 | 108.8 | 92.9  | 88.8  | 97.1  |
| Q3TES0 | <i>Iqsec3</i>   | IQ motif and      | High   | 13 | 13  | 13  | 11 | 1195 | 129   | 6.19  | 168  | 93.3  | 96    | 99.3  | 102.7 | 102.9 | 105.8 |
| Q80VP9 | <i>Asphd2</i>   | Aspartate beta-   | High   | 2  | 1   | 1   | 1  | 343  | 38.7  | 7.05  | 31   | 98.9  | 105.1 | 97.4  | 100.8 | 95.7  | 102.1 |
| Q3UHG7 | <i>Dennd11</i>  | DENN domain-      | High   | 12 | 4   | 4   | 4  | 455  | 51.4  | 5.25  | 38   | 92.8  | 98.4  | 90.8  | 108.1 | 103.4 | 106.4 |
| Q91WJ7 | <i>Spats2l</i>  | SPATS2-like       | Medium | 3  | 1   | 1   | 1  | 558  | 61.6  | 9.69  | 0    |       |       |       |       |       |       |
| Q3UMR5 | <i>Mcu</i>      | Calcium           | High   | 29 | 9   | 14  | 9  | 350  | 39.7  | 8.56  | 279  | 89.9  | 101.3 | 86.7  | 108.2 | 108.4 | 105.4 |
| Q9D1X9 | <i>Tmem50b</i>  | Transmembrane     | Medium | 5  | 1   | 1   | 1  | 158  | 17.9  | 5.39  | 22   |       |       |       |       |       |       |
| P45878 | <i>Fkbp2</i>    | Peptidyl-prolyl   | High   | 53 | 6   | 9   | 6  | 140  | 15.3  | 8.88  | 166  | 98.8  | 97.4  | 105.1 | 102.8 | 98.7  | 97.1  |
| Q9D023 | <i>Mpc2</i>     | Mitochondrial     | High   | 24 | 4   | 8   | 4  | 127  | 14.3  | 10.61 | 54   | 102.9 | 102.9 | 94.5  | 102   | 99.5  | 98.1  |
| P59808 | <i>Sash1</i>    | SAM and SH3       | High   | 1  | 1   | 1   | 1  | 1230 | 135.5 | 6.2   | 15   |       |       |       |       |       |       |
| O70378 | <i>Emc8</i>     | ER membrane       | High   | 34 | 6   | 7   | 6  | 207  | 23.3  | 6.15  | 180  | 98.5  | 97.7  | 101.4 | 97.6  | 102   | 102.9 |
| Q8C8R3 | <i>Ank2</i>     | Ankyrin-2         | High   | 36 | 101 | 150 | 91 | 3898 | 426   | 5.17  | 2493 | 96.8  | 96.6  | 95.6  | 104.3 | 102.5 | 104.2 |
| Q8BHA3 | <i>Dtd2</i>     | D-aminoacyl-      | Medium | 5  | 1   | 1   | 1  | 168  | 18.2  | 7.91  | 19   |       |       |       |       |       |       |
| Q9JKF1 | <i>Iqgap1</i>   | Ras GTPase-       | High   | 14 | 17  | 22  | 17 | 1657 | 188.6 | 6.48  | 312  | 116.4 | 104.7 | 139.9 | 77.5  | 81.5  | 79.9  |
| P14824 | <i>Anxa6</i>    | Annexin A6        | High   | 61 | 35  | 46  | 34 | 673  | 75.8  | 5.5   | 761  | 107.2 | 111.9 | 111.7 | 91.4  | 89.2  | 88.6  |
| O35857 | <i>Timm44</i>   | Mitochondrial     | High   | 40 | 17  | 21  | 17 | 452  | 51.1  | 8.13  | 412  | 98.6  | 101.9 | 93.9  | 103.3 | 101.9 | 100.4 |
| Q8BYP3 | <i>Rhof</i>     | Rho-related       | High   | 26 | 5   | 5   | 5  | 211  | 23.6  | 8.43  | 84   | 98.2  | 98.1  | 105.8 | 99.7  | 98.3  | 100   |
| P61211 | <i>Arl1</i>     | ADP-ribosylation  | High   | 35 | 5   | 11  | 5  | 181  | 20.4  | 5.72  | 175  | 100.5 | 102   | 95.5  | 101.5 | 99.9  | 100.6 |
| Q99LD9 | <i>Eif2b2</i>   | Translation       | High   | 23 | 6   | 7   | 6  | 351  | 38.9  | 6.24  | 126  | 103.9 | 97.5  | 100.5 | 95.2  | 100.5 | 102.3 |
| P27546 | <i>Map4</i>     | Microtubule-      | High   | 35 | 31  | 48  | 31 | 1125 | 117.4 | 4.98  | 545  | 101.6 | 100.5 | 108.5 | 97.3  | 98    | 94.1  |
| O88705 | <i>Hcn3</i>     | Potassium/sodiu   | High   | 3  | 2   | 2   | 1  | 779  | 86.6  | 9.86  | 21   | 99.6  | 95    | 86.6  | 111.4 | 94.9  | 112.5 |
| Q64332 | <i>Syn2</i>     | Synapsin-2        | High   | 61 | 24  | 86  | 21 | 586  | 63.3  | 8.43  | 1695 | 99.4  | 91.1  | 106.4 | 98.1  | 105.3 | 99.7  |
| Q8K1H1 | <i>Tdrd7</i>    | Tudor domain-     | High   | 3  | 2   | 2   | 2  | 1086 | 122.1 | 6.7   | 41   | 104.9 | 104.5 | 111.4 | 87.7  | 91.9  | 99.5  |
| Q8BI84 | <i>Mia3</i>     | Transport and     | High   | 6  | 10  | 13  | 10 | 1930 | 213.5 | 4.75  | 143  | 97.6  | 99.4  | 100.1 | 100.8 | 101.5 | 100.5 |
| Q69Z98 | <i>Brsk2</i>    | Serine/threonine  | High   | 24 | 15  | 19  | 12 | 735  | 81.7  | 8.79  | 165  | 95.2  | 100.6 | 88.4  | 108.6 | 104.6 | 102.5 |
| Q3UHD1 | <i>Adgrb1</i>   | Adhesion G        | High   | 7  | 9   | 12  | 8  | 1582 | 173.2 | 7.56  | 116  | 95.7  | 104.9 | 90.9  | 103.8 | 100.5 | 104.3 |
| Q9D1K2 | <i>Atp6v1f</i>  | V-type proton     | High   | 82 | 8   | 20  | 8  | 119  | 13.4  | 5.82  | 370  | 95.2  | 101.8 | 93.7  | 104   | 101.5 | 103.8 |

|        |                 |                   |        |    |    |     |    |      |       |      |      |       |       |       |       |       |       |
|--------|-----------------|-------------------|--------|----|----|-----|----|------|-------|------|------|-------|-------|-------|-------|-------|-------|
| Q9QX66 | <i>Dpf1</i>     | Zinc finger       | High   | 5  | 1  | 1   | 1  | 387  | 44.2  | 7.09 | 34   | 98    | 100.6 | 114.6 | 107.5 | 95    | 84.4  |
| Q8C7M3 | <i>Trim9</i>    | E3 ubiquitin-     | High   | 14 | 10 | 14  | 10 | 817  | 90.8  | 7.24 | 110  | 96.4  | 95.1  | 94.6  | 107.3 | 104.6 | 102   |
| Q8C3P7 | <i>Mettl3</i>   | N6-adenosine-     | Medium | 1  | 1  | 1   | 1  | 580  | 64.6  | 6.49 | 18   | 69.9  | 83.8  | 79.4  | 128.8 | 62.5  | 175.6 |
| Q8CHT0 | <i>Aldh4a1</i>  | Delta-1-          | High   | 20 | 9  | 11  | 9  | 562  | 61.8  | 8.24 | 171  | 95.2  | 98.2  | 104.9 | 97.2  | 101.8 | 102.7 |
| Q61239 | <i>Fnta</i>     | Protein           | High   | 20 | 6  | 6   | 6  | 377  | 44    | 4.93 | 135  | 100.6 | 97.3  | 104.5 | 100.7 | 96.5  | 100.4 |
| Q9DC70 | <i>Ndufs7</i>   | NADH              | High   | 15 | 4  | 7   | 4  | 224  | 24.7  | 9.92 | 134  | 92.2  | 102.9 | 85.5  | 111.7 | 109.6 | 98.1  |
| Q9ET01 | <i>Pygl</i>     | Glycogen          | High   | 12 | 8  | 18  | 4  | 850  | 97.4  | 7.09 | 312  | 104.3 | 91.9  | 123.1 | 90.5  | 96.8  | 93.4  |
| Q9Z2K1 | <i>Krt16</i>    | Keratin, type I   | High   | 2  | 1  | 1   | 1  | 469  | 51.6  | 5.2  | 27   |       |       |       |       |       |       |
| Q5SV85 | <i>Synrg</i>    | Synergina gamma   | High   | 16 | 14 | 18  | 14 | 1306 | 139.5 | 5.03 | 202  | 99.6  | 97.7  | 102.1 | 98.8  | 99.4  | 102.5 |
| Q4KUS2 | <i>Unc13a</i>   | Protein unc-13    | High   | 18 | 27 | 32  | 27 | 1712 | 193.7 | 5.25 | 435  | 94.9  | 99    | 91.4  | 105.9 | 105.8 | 102.9 |
| Q91VH1 | <i>Adipor1</i>  | Adiponectin       | Medium | 3  | 1  | 1   | 1  | 375  | 42.3  | 7.02 | 0    |       |       |       |       |       |       |
| Q62018 | <i>Ctr9</i>     | RNA               | High   | 2  | 2  | 2   | 2  | 1173 | 133.3 | 6.49 | 56   | 98    | 100   | 95.8  | 102.3 | 103.1 | 100.8 |
| Q8VC30 | <i>Tkfc</i>     | Triokinase/FMN    | High   | 23 | 8  | 8   | 8  | 578  | 59.7  | 6.92 | 173  | 93.7  | 93.1  | 77.8  | 116.1 | 104.6 | 114.7 |
| Q9JKF6 | <i>Nectin1</i>  | Nectin-1          | High   | 26 | 8  | 9   | 8  | 515  | 57    | 6.35 | 87   | 95.2  | 98.9  | 88.8  | 107.1 | 103.9 | 106.2 |
| P49135 | <i>Ercc3</i>    | General           | Low    | 1  | 1  | 1   | 1  | 783  | 89.1  | 7.18 | 0    | 99    | 101.7 | 95.8  | 105.6 | 106.6 | 91.2  |
| O35566 | <i>Cd151</i>    | CD151 antigen     | High   | 7  | 2  | 2   | 2  | 253  | 28.2  | 7.47 | 23   | 94.1  | 104.6 | 144.3 | 81.9  | 86.9  | 88.2  |
| Q810J8 | <i>Zfyve1</i>   | Zinc finger FYVE  | High   | 13 | 10 | 13  | 10 | 777  | 86.9  | 7.34 | 93   | 100.6 | 98.6  | 104.9 | 99.2  | 96.7  | 100   |
| Q8VE37 | <i>Rcc1</i>     | Regulator of      | High   | 4  | 1  | 1   | 1  | 421  | 44.9  | 8.1  | 21   | 90.7  | 104.3 | 102   | 108.4 | 94.7  | 99.9  |
| Q922H1 | <i>Prmt3</i>    | Protein arginine  | High   | 2  | 1  | 1   | 1  | 532  | 59.9  | 5.3  | 43   |       |       |       |       |       |       |
| Q9Z2Y8 | <i>Plpbb</i>    | Pyridoxal         | High   | 37 | 8  | 14  | 8  | 274  | 30    | 8.27 | 297  | 96.8  | 102.1 | 99    | 100.2 | 101.8 | 100.1 |
| Q9CY18 | <i>Snx7</i>     | Sorting nexin-7   | High   | 11 | 3  | 12  | 3  | 387  | 45    | 5.07 | 40   | 95.9  | 92.1  | 92.5  | 111.2 | 99.3  | 108.9 |
| O55013 | <i>Trappc3</i>  | Trafficking       | High   | 35 | 7  | 10  | 7  | 180  | 20.3  | 4.96 | 171  | 95.6  | 98.9  | 95.4  | 104.1 | 102.4 | 103.5 |
| Q80UK0 | <i>Sestd1</i>   | SEC14 domain      | High   | 6  | 5  | 5   | 5  | 696  | 79.3  | 5.1  | 53   | 96.2  | 96.1  | 92.5  | 99.5  | 104.6 | 111   |
| Q3UHD2 | <i>Gfod1</i>    | Glucose-fructose  | High   | 7  | 3  | 4   | 3  | 390  | 43.3  | 5.92 | 48   | 98.4  | 109.1 | 87.9  | 103.6 | 98.7  | 102.4 |
| Q9Z1B3 | <i>Plcb1</i>    | 1-                | High   | 45 | 46 | 86  | 46 | 1216 | 138.3 | 6.13 | 1733 | 95.3  | 99.6  | 86.7  | 107.5 | 105.7 | 105.2 |
| Q8BG32 | <i>Psmc11</i>   | 26S proteasome    | High   | 52 | 18 | 30  | 18 | 422  | 47.4  | 6.48 | 713  | 97.7  | 98.4  | 97.5  | 100.9 | 103   | 102.5 |
| Q0GNC1 | <i>Inf2</i>     | Inverted formin-2 | High   | 7  | 6  | 7   | 6  | 1273 | 138.5 | 5.21 | 161  | 101.3 | 111.6 | 105   | 95.6  | 94.4  | 92.2  |
| O35900 | <i>Lsm2</i>     | U6 snRNA-         | High   | 39 | 3  | 3   | 3  | 95   | 10.8  | 6.52 | 59   | 99.2  | 100.3 | 98.4  | 98    | 100.1 | 104.1 |
| Q61599 | <i>Arhgdib</i>  | Rho GDP-          | High   | 40 | 5  | 9   | 5  | 200  | 22.8  | 5.11 | 157  | 111.7 | 104.4 | 133.6 | 80.3  | 89.3  | 80.7  |
| Q6PAK3 | <i>Prmt8</i>    | Protein arginine  | High   | 27 | 12 | 13  | 9  | 394  | 45.2  | 6.93 | 125  | 99    | 95.5  | 99    | 104.7 | 98.7  | 103.1 |
| P10605 | <i>Ctsb</i>     | Cathepsin B       | High   | 34 | 8  | 15  | 8  | 339  | 37.3  | 5.91 | 247  | 114   | 96.1  | 117.6 | 91.6  | 88.7  | 91.9  |
| P29341 | <i>Pabpc1</i>   | Polyadenylate-    | High   | 28 | 20 | 35  | 20 | 636  | 70.6  | 9.5  | 546  | 102.1 | 101   | 100.8 | 97.8  | 99.5  | 98.8  |
| O08756 | <i>Hsd17b10</i> | 3-hydroxyacyl-    | High   | 30 | 6  | 10  | 6  | 261  | 27.4  | 8.41 | 294  | 96.5  | 102.4 | 98.9  | 102.4 | 100.3 | 99.4  |
| Q8K4P8 | <i>Hecw1</i>    | E3 ubiquitin-     | High   | 2  | 3  | 3   | 1  | 1604 | 179.4 | 5.39 | 84   | 96    | 103.4 | 85.1  | 109.2 | 105.3 | 101.1 |
| E9Q9R9 | <i>Dlg5</i>     | Disks large       | Medium | 1  | 1  | 1   | 1  | 1921 | 214.3 | 7.4  | 0    |       |       |       |       |       |       |
| Q6PCP5 | <i>Mff</i>      | Mitochondrial     | High   | 40 | 7  | 13  | 7  | 291  | 32.9  | 6.83 | 421  | 97.7  | 96.9  | 98.4  | 103.9 | 100.9 | 102.1 |
| O08677 | <i>Kng1</i>     | Kininogen-1       | High   | 16 | 9  | 15  | 9  | 661  | 73.1  | 6.54 | 263  | 185.3 | 62.9  | 221.2 | 41.4  | 43.2  | 46.2  |
| Q9WTU3 | <i>Scn8a</i>    | Sodium channel    | High   | 2  | 4  | 5   | 1  | 1978 | 225   | 6.25 | 103  | 95    | 103.7 | 94.5  | 108.1 | 103.2 | 95.4  |
| P52795 | <i>Efnb1</i>    | Ephrin-B1         | High   | 13 | 3  | 3   | 3  | 345  | 37.8  | 9.03 | 26   | 97.6  | 94.3  | 98.4  | 101.4 | 105.9 | 102.4 |
| O54818 | <i>Tpd52l1</i>  | Tumor protein     | High   | 9  | 2  | 3   | 2  | 204  | 22.5  | 6.21 | 55   | 97    | 99.2  | 91.3  | 96.3  | 113.5 | 102.6 |
| P29351 | <i>Ptpn6</i>    | Tyrosine-protein  | High   | 3  | 2  | 2   | 2  | 595  | 67.5  | 7.81 | 27   | 138.6 | 111.6 | 161.9 | 62.8  | 62    | 63    |
| Q9JLN9 | <i>Mtor</i>     | Serine/threonine  | High   | 13 | 26 | 29  | 26 | 2549 | 288.6 | 7.17 | 356  | 94.4  | 97.7  | 93.5  | 108.8 | 101.5 | 104.2 |
| P10833 | <i>Rras</i>     | Ras-related       | High   | 22 | 5  | 7   | 3  | 218  | 23.7  | 6.79 | 188  |       |       |       |       |       |       |
| Q9EPB5 | <i>Serhl</i>    | Serine            | High   | 4  | 1  | 1   | 1  | 311  | 35.3  | 8.1  | 29   |       |       |       |       |       |       |
| Q80YD1 | <i>Supv3l1</i>  | ATP-dependent     | High   | 9  | 6  | 8   | 6  | 779  | 87    | 7.84 | 138  | 102.8 | 100.1 | 100.2 | 98.5  | 102   | 96.4  |
| P19783 | <i>Cox4i1</i>   | Cytochrome c      | High   | 56 | 9  | 29  | 9  | 169  | 19.5  | 9.23 | 674  | 93.2  | 104.1 | 88.9  | 104.8 | 108.8 | 100.2 |
| P43023 | <i>Cox6a2</i>   | Cytochrome c      | Low    | 7  | 1  | 1   | 1  | 97   | 10.7  | 9.07 | 16   | 102   | 100.8 | 89.6  | 112.2 | 92.1  | 103.2 |
| Q8C120 | <i>Sh3rf3</i>   | E3 ubiquitin-     | High   | 2  | 2  | 2   | 2  | 878  | 93.1  | 8.53 | 25   |       |       |       |       |       |       |
| P07901 | <i>Hsp90aa1</i> | Heat shock        | High   | 55 | 40 | 150 | 27 | 733  | 84.7  | 5.01 | 2796 | 101.5 | 101.4 | 100.1 | 99.4  | 99.6  | 98.1  |
| Q8C2Q3 | <i>Rbm14</i>    | RNA-binding       | High   | 10 | 6  | 8   | 6  | 669  | 69.4  | 9.67 | 74   | 99.2  | 98.9  | 101.8 | 102.5 | 97.2  | 100.4 |
| Q9DBL2 | <i>Gdap2</i>    | Ganglioside-      | High   | 3  | 1  | 1   | 1  | 498  | 56.2  | 5.39 | 30   |       |       |       |       |       |       |
| Q2TA57 | <i>Asphd1</i>   | Aspartate beta-   | High   | 8  | 2  | 2   | 2  | 360  | 38.2  | 8.25 | 45   |       |       |       |       |       |       |
| Q4VAA2 | <i>Cdv3</i>     | Protein CDV3      | High   | 18 | 5  | 6   | 5  | 281  | 29.7  | 6.1  | 102  | 97.5  | 101.3 | 93.4  | 103   | 102.7 | 102.1 |
| Q80VP0 | <i>Tecpr1</i>   | Tectonin beta-    | High   | 19 | 15 | 17  | 15 | 1166 | 130.2 | 6.48 | 145  | 95.1  | 97.4  | 92.6  | 106.1 | 104.1 | 104.8 |
| P50114 | <i>S100b</i>    | Protein S100-B    | High   | 24 | 3  | 6   | 3  | 92   | 10.7  | 4.55 | 168  | 100.2 | 107.2 | 102.3 | 102.3 | 92.3  | 95.7  |
| Q9D883 | <i>U2af1</i>    | Splicing factor   | High   | 18 | 4  | 4   | 4  | 239  | 27.8  | 8.81 | 53   | 99.8  | 89.6  | 103.9 | 105.4 | 98.5  | 102.7 |
| Q99N50 | <i>Sytl2</i>    | Synaptotagmin-    | Medium | 1  | 1  | 1   | 1  | 950  | 106.7 | 6.57 | 25   | 105.9 | 101.8 | 93.7  | 107.5 | 88.4  | 102.6 |
| Q0VGU4 | <i>Vgf</i>      | Neurosecretory    | High   | 13 | 6  | 7   | 6  | 617  | 68.2  | 4.7  | 27   | 117.5 | 83.6  | 150.6 | 82.7  | 85.4  | 80.2  |
| P55288 | <i>Cdh11</i>    | Cadherin-11       | High   | 10 | 6  | 7   | 6  | 796  | 88.1  | 4.89 | 115  | 97.3  | 92.7  | 94.4  | 103.6 | 104.2 | 107.8 |
| Q9Z0H4 | <i>Cellf2</i>   | CUGBP Elav-like   | High   | 18 | 9  | 14  | 8  | 508  | 54.2  | 8.76 | 351  | 94.2  | 92.6  | 99    | 99.4  | 109.6 | 105.2 |
| Q9D1J3 | <i>Sarnp</i>    | SAP domain-       | High   | 28 | 5  | 6   | 5  | 210  | 23.5  | 6.65 | 118  | 99.6  | 98.7  | 108   | 97.7  | 97    | 99.1  |
| Q3UUG6 | <i>Tbc1d24</i>  | TBC1 domain       | High   | 23 | 12 | 15  | 12 | 561  | 63.2  | 7.24 | 253  | 98.5  | 97.2  | 97.7  | 101.5 | 100.9 | 104.2 |
| Q9ESJ4 | <i>Nckipsd</i>  | NCK-interacting   | High   | 26 | 15 | 19  | 15 | 714  | 78.5  | 6.05 | 392  | 95    | 102.3 | 91.9  | 104.6 | 103.3 | 102.8 |
| Q99N96 | <i>Mrpl1</i>    | 39S ribosomal     | High   | 26 | 6  | 6   | 6  | 336  | 37.6  | 8.72 | 101  | 96.1  | 97.8  | 92.4  | 108.2 | 106   | 99.5  |
| Q8BVA5 | <i>Ldah</i>     | Lipid droplet-    | Medium | 4  | 1  | 1   | 1  | 326  | 37.3  | 8.28 | 25   | 91.7  | 99.6  | 102.4 | 109.1 | 102.4 | 94.8  |
| Q99MU3 | <i>Adar</i>     | Double-stranded   | High   | 2  | 2  | 2   | 2  | 1178 | 130.4 | 8.7  | 29   | 95.4  | 105.9 | 96.7  | 102.8 | 88.6  | 110.7 |
| Q9ESW4 | <i>Agk</i>      | Acylglycerol      | High   | 37 | 14 | 21  | 14 | 421  | 46.9  | 8.4  | 386  | 92    | 98.7  | 86.1  | 107.8 | 108.6 | 106.7 |
| Q9Z315 | <i>Sart1</i>    | U4/U6.U5 tri-     | High   | 8  | 4  | 4   | 4  | 806  | 90.8  | 5.82 | 86   | 93.4  | 102.3 | 95.2  | 102.4 | 104.8 | 101.9 |

|        |                  |                    |        |    |    |     |    |      |       |       |      |       |       |       |       |       |       |
|--------|------------------|--------------------|--------|----|----|-----|----|------|-------|-------|------|-------|-------|-------|-------|-------|-------|
| Q9QZ49 | <i>Ubxn8</i>     | UBX domain-        | High   | 3  | 1  | 2   | 1  | 277  | 31.5  | 8.37  | 31   | 91.6  | 113.7 | 77.7  | 114.8 | 108.7 | 93.6  |
| Q91Z31 | <i>Ptbp2</i>     | Polypyrimidine     | High   | 36 | 11 | 17  | 10 | 531  | 57.5  | 8.66  | 374  | 98.8  | 96.5  | 98    | 103.3 | 104.5 | 98.9  |
| Q505F5 | <i>Lrrc47</i>    | Leucine-rich       | High   | 40 | 17 | 22  | 17 | 581  | 63.6  | 8.1   | 281  | 99.2  | 95.7  | 101.3 | 101.8 | 100.6 | 101.4 |
| Q6P5D8 | <i>Smchd1</i>    | Structural         | High   | 1  | 3  | 3   | 3  | 2007 | 225.5 | 7.24  | 15   | 99.7  | 103.6 | 101.5 | 101.5 | 97.5  | 96.2  |
| Q50H33 | <i>Kctd8</i>     | BTB/POZ            | High   | 3  | 1  | 2   | 1  | 476  | 52.7  | 8.38  | 43   | 95.6  | 110.3 | 85.5  | 101.3 | 108.1 | 99.2  |
| Q569Z6 | <i>Thrap3</i>    | Thyroid hormone    | High   | 6  | 5  | 6   | 5  | 951  | 108.1 | 10.17 | 59   | 99.2  | 100.1 | 104.6 | 103.7 | 96.5  | 95.7  |
| Q9WUM5 | <i>Suc1g1</i>    | Succinate--CoA     | High   | 28 | 9  | 17  | 9  | 346  | 36.1  | 9.39  | 306  | 100   | 103.8 | 102.1 | 101.5 | 97.3  | 95.3  |
| P63082 | <i>Atp6v0c</i>   | V-type proton      | High   | 12 | 1  | 11  | 1  | 155  | 15.8  | 9.13  | 84   | 103.8 | 97.8  | 98.7  | 97.1  | 102.8 | 99.9  |
| Q60809 | <i>Cnot7</i>     | CCR4-NOT           | High   | 5  | 1  | 2   | 1  | 285  | 32.7  | 4.84  | 54   | 95.1  | 95.7  | 92.8  | 103.7 | 103   | 109.8 |
| Q9JIY0 | <i>Plekho1</i>   | Pleckstrin         | High   | 7  | 2  | 2   | 2  | 408  | 46    | 8.97  | 35   | 88.2  | 96.1  | 94.4  | 109.1 | 100.8 | 111.4 |
| Q4V9Z5 | <i>Sez6l2</i>    | Seizure 6-like     | High   | 5  | 4  | 6   | 4  | 910  | 97.4  | 4.87  | 88   | 100.2 | 96.8  | 100.5 | 97.7  | 97.8  | 107   |
| Q99LD8 | <i>Ddah2</i>     | N(G),N(G)-         | High   | 41 | 8  | 9   | 7  | 285  | 29.6  | 6.01  | 133  | 97.3  | 97.2  | 100.9 | 96.7  | 99.9  | 108   |
| Q9QUI0 | <i>Rhoa</i>      | Transforming       | High   | 50 | 8  | 21  | 7  | 193  | 21.8  | 6.1   | 342  | 100.7 | 101.7 | 106.2 | 97    | 95.4  | 99    |
| Q9ER58 | <i>Spock2</i>    | Testican-2         | Medium | 3  | 1  | 1   | 1  | 423  | 46.8  | 4.87  | 13   | 101.7 | 92.7  | 100   | 103.7 | 106.5 | 95.3  |
| O88741 | <i>Gdap1</i>     | Ganglioside-       | High   | 18 | 9  | 14  | 9  | 358  | 41.3  | 8.37  | 160  | 94.9  | 98.8  | 88.7  | 105.5 | 107.2 | 104.9 |
| Q61990 | <i>Pcbp2</i>     | Poly(rC)-binding   | High   | 36 | 11 | 25  | 4  | 362  | 38.2  | 6.79  | 512  | 97.8  | 99.6  | 98.8  | 101.4 | 98.5  | 103.8 |
| Q9CZP5 | <i>Bcs1l</i>     | Mitochondrial      | High   | 34 | 12 | 16  | 12 | 418  | 47.4  | 7.93  | 235  | 98.1  | 98    | 97.8  | 100   | 101.5 | 104.7 |
| Q8CBW3 | <i>Abi1</i>      | Abl interactor 1   | High   | 33 | 14 | 25  | 12 | 481  | 52.3  | 7.64  | 437  | 95.9  | 95.7  | 98.7  | 102.4 | 104   | 103.3 |
| Q99LI8 | <i>Hgs</i>       | Hepatocyte         | High   | 25 | 13 | 15  | 13 | 775  | 86    | 6.16  | 156  | 95.8  | 95.8  | 92.6  | 103.6 | 104.1 | 108.1 |
| B2RUJ5 | <i>Apba1</i>     | Amyloid-beta A4    | High   | 2  | 2  | 2   | 2  | 842  | 92.9  | 4.88  | 70   | 103.7 | 100.1 | 100.7 | 100.5 | 100.1 | 94.8  |
| Q9D7V2 | <i>Lysmd2</i>    | LysM and           | High   | 10 | 2  | 3   | 2  | 215  | 23.7  | 5.71  | 42   | 65.4  | 70    | 74.3  | 77.2  | 82.1  | 230.9 |
| Q61136 | <i>Prpf4b</i>    | Serine/threonine   | Medium | 1  | 1  | 1   | 1  | 1007 | 116.9 | 10.23 | 21   | 63    | 68.4  | 120.2 | 62.4  | 137.3 | 148.7 |
| O55091 | <i>Impact</i>    | Protein IMPACT     | High   | 19 | 5  | 7   | 5  | 318  | 36.3  | 5.05  | 106  | 94.1  | 95.6  | 101.7 | 99.7  | 101.1 | 107.8 |
| P26043 | <i>Rdx</i>       | Radixin OS=Mus     | High   | 35 | 20 | 32  | 11 | 583  | 68.5  | 6.2   | 588  | 102.5 | 102.9 | 108   | 90.1  | 96.9  | 99.6  |
| Q61941 | <i>Nnt</i>       | NAD(P)             | High   | 26 | 26 | 41  | 26 | 1086 | 113.8 | 7.64  | 682  | 103.8 | 111.3 | 105.5 | 92.9  | 94.7  | 91.8  |
| P17439 | <i>Gba</i>       | Lysosomal acid     | High   | 8  | 4  | 5   | 4  | 515  | 57.6  | 7.75  | 86   | 97    | 103.1 | 109.5 | 98.6  | 90.9  | 100.9 |
| Q64373 | <i>Bcl2l1</i>    | Bcl-2-like protein | High   | 8  | 2  | 3   | 2  | 233  | 26.1  | 4.94  | 70   | 96.7  | 102.8 | 95.8  | 99.5  | 106.6 | 98.7  |
| P32067 | <i>Ssb</i>       | Lupus La protein   | High   | 38 | 15 | 23  | 15 | 415  | 47.7  | 9.77  | 314  | 99.9  | 99.6  | 98.6  | 103.2 | 102.7 | 96.1  |
| O88569 | <i>Hnrmpa2b1</i> | Heterogeneous      | High   | 48 | 19 | 46  | 16 | 353  | 37.4  | 8.95  | 759  | 100.2 | 94.6  | 101.2 | 101.4 | 102.7 | 99.9  |
| Q5U458 | <i>Dnajc11</i>   | DnaJ homolog       | High   | 27 | 12 | 16  | 12 | 559  | 63.2  | 8.32  | 266  | 94.4  | 100.9 | 96.7  | 105   | 99.8  | 103.1 |
| Q9QXB9 | <i>Drg2</i>      | Developmentally    | High   | 32 | 10 | 12  | 9  | 364  | 40.7  | 8.88  | 245  | 98    | 98    | 97.7  | 101.3 | 99.3  | 105.8 |
| Q9JKC7 | <i>Ap4m1</i>     | AP-4 complex       | High   | 3  | 1  | 1   | 1  | 449  | 49.5  | 6.64  | 20   |       |       |       |       |       |       |
| Q3UTJ2 | <i>Sorbs2</i>    | Sorbin and SH3     | High   | 20 | 20 | 26  | 20 | 1180 | 132.3 | 8.53  | 415  | 96.6  | 100.2 | 90.6  | 105.6 | 103.3 | 103.6 |
| Q9JK53 | <i>Pre1p</i>     | Prolargin          | Medium | 2  | 1  | 1   | 1  | 378  | 43.3  | 9.54  | 28   | 109.4 | 82.8  | 67.6  | 68.1  | 113.7 | 158.3 |
| Q8R3I3 | <i>Cog6</i>      | Conserved          | High   | 2  | 1  | 2   | 1  | 657  | 73    | 6.14  | 42   | 103.5 | 95.7  | 94.7  | 100.2 | 98.6  | 107.3 |
| Q9CXV1 | <i>Sdhd</i>      | Succinate          | High   | 4  | 1  | 2   | 1  | 159  | 17    | 9.1   | 28   | 80.4  | 155   | 118.1 | 50.9  | 86.7  | 108.9 |
| Q80YN3 | <i>Bcas1</i>     | Breast             | High   | 35 | 16 | 26  | 16 | 633  | 67.3  | 6.21  | 309  | 92.1  | 106.4 | 88.5  | 104.8 | 99.4  | 108.9 |
| B9EJ86 | <i>Osbpl8</i>    | Oxysterol-         | High   | 18 | 12 | 14  | 12 | 889  | 101.2 | 6.96  | 156  | 91.9  | 98.2  | 87.4  | 108   | 105.6 | 109   |
| Q8BGR6 | <i>Arl15</i>     | ADP-ribosylation   | High   | 11 | 3  | 4   | 3  | 204  | 22.9  | 5.29  | 71   | 93.9  | 108.1 | 92.1  | 99.5  | 103.6 | 102.8 |
| Q6A044 | <i>Fam189a1</i>  | Protein            | High   | 3  | 1  | 2   | 1  | 515  | 54.4  | 6.35  | 52   | 79.9  | 105.3 | 89.8  | 105.9 | 107.2 | 111.8 |
| A6H6A9 | <i>Rabgap1l</i>  | Rab GTPase-        | High   | 3  | 2  | 2   | 2  | 815  | 92.3  | 5.31  | 31   | 94.4  | 91.2  | 85    | 110.9 | 102.7 | 115.9 |
| Q9CRA5 | <i>Golph3</i>    | Golgi              | High   | 9  | 2  | 4   | 2  | 298  | 33.7  | 6.44  | 38   | 104.2 | 90.6  | 108.8 | 88.6  | 102.4 | 105.4 |
| Q6IMP4 | <i>Panx2</i>     | Pannexin-2         | Low    | 3  | 1  | 1   | 1  | 677  | 74.6  | 7.52  | 0    | 87.4  | 94.4  | 96.2  | 105.3 | 105.3 | 111.4 |
| Q9CQS2 | <i>Nop10</i>     | H/ACA              | Medium | 20 | 1  | 1   | 1  | 64   | 7.7   | 9.99  | 0    |       |       |       |       |       |       |
| Q9JIX8 | <i>Acin1</i>     | Apoptotic          | High   | 6  | 6  | 6   | 6  | 1338 | 150.6 | 5.91  | 89   | 101.7 | 103.7 | 97.3  | 99.5  | 97    | 100.8 |
| Q8C650 | <i>Septin10</i>  | Septin-10          | High   | 5  | 2  | 7   | 1  | 452  | 52.4  | 6.6   | 130  | 111   | 108.8 | 122.8 | 96.8  | 84.3  | 76.3  |
| Q69ZS8 | <i>Kazn</i>      | Kazrin OS=Mus      | High   | 5  | 3  | 4   | 3  | 779  | 86.7  | 6.9   | 71   | 97.7  | 99.7  | 99.5  | 102   | 100   | 101.1 |
| Q9JJR8 | <i>Tmem9b</i>    | Transmembrane      | High   | 5  | 1  | 1   | 1  | 199  | 22.6  | 8.18  | 27   | 91.7  | 96.6  | 116.2 | 112.7 | 85.1  | 97.7  |
| O35668 | <i>Hap1</i>      | Huntingtin-        | Medium | 1  | 1  | 1   | 1  | 628  | 70.1  | 4.74  | 0    | 110.9 | 94.6  | 113.1 | 90.4  | 83.9  | 107.2 |
| Q8C0T5 | <i>Sipa1l1</i>   | Signal-induced     | High   | 19 | 25 | 32  | 25 | 1782 | 196.9 | 8.13  | 359  | 97.6  | 103.6 | 94.8  | 102.3 | 100.3 | 101.4 |
| O70451 | <i>Slc16a7</i>   | Monocarboxylate    | High   | 6  | 3  | 3   | 3  | 484  | 52.6  | 9.31  | 19   | 98.4  | 96.8  | 77.8  | 107.3 | 107.8 | 111.9 |
| Q8CFI7 | <i>Polr2b</i>    | DNA-directed       | High   | 2  | 2  | 2   | 2  | 1174 | 133.8 | 6.87  | 35   |       |       |       |       |       |       |
| E9Q7X7 | <i>Nrxn2</i>     | Neurexin-2         | High   | 8  | 13 | 14  | 11 | 1710 | 184.8 | 5.9   | 169  | 95.8  | 101.8 | 91.3  | 105.3 | 103.4 | 102.4 |
| Q9DBR1 | <i>Xrn2</i>      | 5'-3'              | High   | 3  | 2  | 2   | 2  | 951  | 108.6 | 7.59  | 55   | 100.9 | 102.5 | 87.8  | 107.1 | 101.6 | 100.1 |
| O35607 | <i>Bmpr2</i>     | Bone               | High   | 5  | 4  | 4   | 4  | 1038 | 114.9 | 6.23  | 0    | 98.2  | 98.1  | 81.4  | 115.7 | 101.3 | 105.4 |
| Q7TNR9 | <i>Arhgef4</i>   | Rho guanine        | High   | 6  | 3  | 4   | 2  | 484  | 56.6  | 7.94  | 76   | 103.9 | 98.5  | 99.1  | 101   | 99.7  | 97.8  |
| Q5GH67 | <i>Xkr4</i>      | XK-related         | Low    | 1  | 1  | 1   | 1  | 647  | 71.5  | 8.03  | 0    | 97.8  | 101.7 | 100.7 | 102.2 | 99.3  | 98.3  |
| Q8K2P7 | <i>Slc38a1</i>   | Sodium-coupled     | Medium | 2  | 1  | 1   | 1  | 485  | 53.8  | 7.08  | 26   | 98.8  | 95.5  | 88.4  | 109.3 | 104.6 | 103.3 |
| Q9WUQ5 | <i>Cxcl14</i>    | C-X-C motif        | Low    | 7  | 1  | 1   | 1  | 99   | 11.7  | 9.88  | 0    |       |       |       |       |       |       |
| Q5H8C4 | <i>Vps13a</i>    | Vacuolar protein   | High   | 10 | 27 | 32  | 26 | 3166 | 359.2 | 6.19  | 458  | 99.7  | 101.1 | 98    | 99.4  | 101.7 | 100.2 |
| Q8C0J2 | <i>Atg16l1</i>   | Autophagy-         | High   | 9  | 5  | 5   | 5  | 607  | 68.1  | 6.38  | 120  | 100.4 | 96.2  | 96.6  | 99.5  | 101   | 106.2 |
| P61202 | <i>Cops2</i>     | COP9               | High   | 28 | 11 | 15  | 11 | 443  | 51.6  | 5.53  | 151  | 99.4  | 103   | 100.3 | 100.9 | 98.1  | 98.3  |
| Q5HZI9 | <i>Slc25a51</i>  | Mitochondrial      | High   | 9  | 3  | 4   | 3  | 298  | 33.7  | 9.66  | 68   | 98.9  | 100.5 | 95.4  | 99.3  | 100.8 | 105.1 |
| Q99KP3 | <i>Cry1l</i>     | Lambda-            | High   | 17 | 5  | 5   | 5  | 319  | 35.2  | 5.86  | 86   | 100.3 | 99    | 97.4  | 98.4  | 100.7 | 104.3 |
| Q8BM55 | <i>Tmem214</i>   | Transmembrane      | High   | 2  | 2  | 2   | 2  | 687  | 76.4  | 9.29  | 36   | 97.1  | 100.7 | 109.9 | 100.1 | 96.5  | 95.8  |
| P17182 | <i>Eno1</i>      | Alpha-enolase      | High   | 68 | 23 | 202 | 19 | 434  | 47.1  | 6.8   | 5156 | 100   | 102.4 | 95.5  | 99.9  | 102.2 | 99.9  |
| A2ASQ1 | <i>Agrn</i>      | Agtrin OS=Mus      | High   | 3  | 6  | 7   | 6  | 1950 | 207.4 | 6.32  | 82   | 98.3  | 99.1  | 98.7  | 99.9  | 94.5  | 109.6 |
| A2A699 | <i>Fam171a2</i>  | Protein            | High   | 8  | 5  | 5   | 5  | 822  | 87.4  | 8.05  | 76   | 104.9 | 92.2  | 110.5 | 86.6  | 105   | 100.8 |

|        |                 |                    |        |    |    |     |    |      |       |       |      |       |       |       |       |       |       |
|--------|-----------------|--------------------|--------|----|----|-----|----|------|-------|-------|------|-------|-------|-------|-------|-------|-------|
| P61793 | <i>Lpar1</i>    | Lysophosphatidi    | Low    | 3  | 1  | 1   | 1  | 364  | 41.1  | 8.53  | 0    | 97.5  | 97.1  | 98.7  | 94.5  | 107.9 | 104.3 |
| Q8K337 | <i>Inpp5b</i>   | Type II inositol   | High   | 1  | 1  | 1   | 1  | 993  | 112.7 | 5.64  | 16   |       |       |       |       |       |       |
| Q99JP0 | <i>Map4k3</i>   | Mitogen-           | High   | 2  | 2  | 2   | 2  | 894  | 101.1 | 7.64  | 39   | 91.1  | 112.5 | 103   | 96.1  | 93.1  | 104.3 |
| Q9QY36 | <i>Naa10</i>    | N-alpha-           | High   | 22 | 5  | 6   | 5  | 235  | 26.5  | 5.64  | 50   | 99    | 99.7  | 104.5 | 105.7 | 92.4  | 98.7  |
| P70377 | <i>Fgf13</i>    | Fibroblast growth  | High   | 4  | 1  | 1   | 1  | 245  | 27.6  | 9.91  | 25   |       |       |       |       |       |       |
| Q71R19 | <i>Kyat3</i>    | Kynurenine--       | High   | 8  | 4  | 5   | 3  | 455  | 51.1  | 8.37  | 39   | 87.1  | 126.8 | 86    | 85.8  | 119   | 95.2  |
| Q6PE01 | <i>Snrnp40</i>  | U5 small nuclear   | High   | 18 | 4  | 4   | 4  | 358  | 39.3  | 8.1   | 43   | 103.9 | 99.4  | 100.5 | 98    | 96.6  | 101.7 |
| Q99NB1 | <i>Acss1</i>    | Acetyl-coenzyme    | High   | 20 | 10 | 10  | 10 | 682  | 74.6  | 6.98  | 56   | 98.8  | 93.9  | 108.4 | 96.4  | 103.3 | 99.2  |
| Q9Z2H2 | <i>Rgs6</i>     | Regulator of G-    | High   | 31 | 11 | 19  | 9  | 472  | 54.5  | 7.42  | 348  | 96.3  | 110.2 | 76.8  | 109.8 | 103.9 | 103.1 |
| C0HK79 | <i>Arxes1</i>   | Adipocyte-         | High   | 21 | 3  | 3   | 3  | 180  | 20.1  | 9.6   | 83   | 103.1 | 98.4  | 122.5 | 93.5  | 92.6  | 90    |
| Q791V5 | <i>Mtch2</i>    | Mitochondrial      | High   | 32 | 7  | 14  | 7  | 303  | 33.5  | 8.25  | 312  | 96.3  | 101   | 92.3  | 104.2 | 101.5 | 104.8 |
| O88986 | <i>Gcat</i>     | 2-amino-3-         | High   | 18 | 4  | 5   | 4  | 416  | 44.9  | 7.33  | 107  | 92.5  | 105.5 | 96.4  | 103.1 | 101   | 101.5 |
| Q99PL7 | <i>Scd3</i>     | Acyl-CoA           | Medium | 2  | 1  | 1   | 1  | 359  | 41.4  | 8.94  | 0    | 102.8 | 115.3 | 109.1 | 91.2  | 91.5  | 90    |
| Q8BTF8 | <i>Raly1</i>    | RNA-binding        | High   | 12 | 4  | 4   | 3  | 293  | 32.4  | 7.93  | 60   | 94.7  | 92.4  | 92.8  | 111.6 | 106.6 | 101.9 |
| Q8VDL4 | <i>Adpgk</i>    | ADP-dependent      | High   | 13 | 3  | 3   | 3  | 496  | 53.9  | 5.62  | 38   | 103.9 | 99.9  | 104.5 | 95.9  | 89    | 106.8 |
| P49962 | <i>Srp9</i>     | Signal             | High   | 31 | 3  | 3   | 3  | 86   | 10.2  | 7.99  | 61   | 97.3  | 102.6 | 113.6 | 94.6  | 93.8  | 98    |
| O55186 | <i>Cd59a</i>    | CD59A              | Low    | 14 | 1  | 1   | 1  | 123  | 13.6  | 7.47  | 15   |       |       |       |       |       |       |
| Q80U40 | <i>Rimbp2</i>   | RIMS-binding       | High   | 15 | 13 | 15  | 13 | 1072 | 118.3 | 5.35  | 215  | 94.7  | 100.7 | 94.8  | 101.6 | 104.9 | 103.3 |
| O88643 | <i>Pak1</i>     | Serine/threonine   | High   | 43 | 18 | 46  | 9  | 545  | 60.7  | 5.74  | 900  | 96.8  | 102   | 85.5  | 105.5 | 105.3 | 104.8 |
| A2AWA9 | <i>Rabgap1</i>  | Rab GTPase-        | High   | 13 | 13 | 14  | 13 | 1064 | 120.7 | 5.25  | 124  | 101.7 | 95.8  | 104.6 | 99.3  | 98.7  | 99.9  |
| P0C192 | <i>Lrrc4b</i>   | Leucine-rich       | High   | 6  | 5  | 5   | 3  | 709  | 76.1  | 7.24  | 71   | 111.7 | 104.5 | 113.8 | 92.7  | 90.5  | 86.8  |
| Q9JLM8 | <i>Dclk1</i>    | Serine/threonine   | High   | 37 | 24 | 43  | 23 | 756  | 84.1  | 8.87  | 947  | 91.1  | 95.3  | 83.8  | 112.6 | 111.4 | 105.8 |
| Q99P88 | <i>Nup155</i>   | Nuclear pore       | High   | 6  | 8  | 8   | 8  | 1391 | 155   | 6.15  | 96   | 102   | 96    | 99.9  | 100.6 | 99.6  | 102   |
| Q99LP6 | <i>Grpel1</i>   | GrpE protein       | High   | 34 | 6  | 8   | 6  | 217  | 24.3  | 8.38  | 218  | 100.4 | 102.8 | 97    | 99.9  | 101.4 | 98.4  |
| P61750 | <i>Arf4</i>     | ADP-ribosylation   | High   | 51 | 7  | 33  | 2  | 180  | 20.4  | 7.14  | 860  | 99.5  | 102.5 | 108.1 | 97.2  | 96.9  | 95.8  |
| Q9CQE5 | <i>Rgs10</i>    | Regulator of G-    | High   | 42 | 6  | 7   | 6  | 181  | 21.1  | 6.81  | 147  | 107.4 | 110.8 | 116.6 | 89.9  | 86.6  | 88.6  |
| Q99JF8 | <i>Psip1</i>    | PC4 and            | High   | 23 | 11 | 17  | 10 | 528  | 59.7  | 9.13  | 188  | 100.4 | 95.7  | 98.1  | 105.6 | 101   | 99.2  |
| Q8VCM7 | <i>Fgg</i>      | Fibrinogen         | High   | 49 | 16 | 23  | 16 | 436  | 49.4  | 5.86  | 361  | 199.8 | 62.7  | 205.2 | 42.7  | 43.3  | 46.4  |
| Q9CQJ8 | <i>Ndufb9</i>   | NADH               | High   | 52 | 6  | 14  | 6  | 179  | 22    | 7.8   | 268  | 97.2  | 100.6 | 98.2  | 100.5 | 102.7 | 100.7 |
| Q9JK42 | <i>Pdk2</i>     | [Pyruvate          | High   | 19 | 6  | 11  | 4  | 407  | 46    | 6.61  | 308  | 101.5 | 98.3  | 95.5  | 105.2 | 96.7  | 102.8 |
| Q3UNA4 | <i>Nxt2</i>     | NTF2-related       | High   | 15 | 2  | 2   | 2  | 142  | 16.2  | 5.81  | 74   | 96.4  | 101.7 | 94.4  | 106.2 | 99.9  | 101.5 |
| Q61247 | <i>Serpint2</i> | Alpha-2-           | High   | 3  | 1  | 2   | 1  | 491  | 54.9  | 6.3   | 40   | 157.2 | 75    | 192.9 | 55.4  | 55.2  | 64.2  |
| Q3TRM4 | <i>Pnpla6</i>   | Patatin-like       | High   | 3  | 3  | 3   | 3  | 1355 | 149.4 | 7.83  | 70   | 96.4  | 92.9  | 101.8 | 103.6 | 95    | 110.3 |
| Q8VEK0 | <i>Tmem30a</i>  | Cell cycle control | High   | 18 | 5  | 7   | 5  | 364  | 41    | 8.37  | 184  | 106.4 | 98.2  | 99.6  | 98.6  | 99    | 98.3  |
| P26443 | <i>Glud1</i>    | Glutamate          | High   | 46 | 24 | 67  | 24 | 558  | 61.3  | 8     | 1057 | 97.2  | 102.7 | 98.2  | 99.7  | 101.5 | 100.7 |
| Q8R5M8 | <i>Cadm1</i>    | Cell adhesion      | High   | 33 | 10 | 19  | 10 | 456  | 49.8  | 5.03  | 376  | 96.1  | 90.7  | 95.4  | 102.1 | 105.3 | 110.4 |
| P63166 | <i>Sumo1</i>    | Small ubiquitin-   | High   | 19 | 2  | 2   | 2  | 101  | 11.6  | 5.52  | 39   | 100.2 | 97.1  | 96    | 96.3  | 101.6 | 108.8 |
| Q3TY60 | <i>Fam131b</i>  | Protein            | High   | 10 | 3  | 3   | 3  | 332  | 35.9  | 4.45  | 38   | 90.3  | 102   | 79.9  | 114.2 | 101.9 | 111.8 |
| Q9D1R9 | <i>Rpl34</i>    | 60S ribosomal      | High   | 34 | 5  | 7   | 5  | 117  | 13.3  | 11.47 | 100  | 104.5 | 101.1 | 104.9 | 104.8 | 94.5  | 90.2  |
| Q8CIV2 | <i>Tmem259</i>  | Membralin          | Low    | 4  | 1  | 1   | 1  | 574  | 63.5  | 5.49  | 0    |       |       |       |       |       |       |
| Q921X6 | <i>Polr3f</i>   | DNA-directed       | High   | 4  | 1  | 1   | 1  | 316  | 35.6  | 6.11  | 41   | 97.4  | 96    | 97.4  | 107.5 | 106.4 | 95.4  |
| O35083 | <i>Agpat1</i>   | 1-acyl-sn-         | High   | 23 | 4  | 6   | 4  | 285  | 31.7  | 9.14  | 132  | 95.9  | 99.7  | 103.3 | 102.9 | 94.1  | 104.1 |
| A2AIV2 | <i>Virma</i>    | Protein virilizer  | Low    | 0  | 1  | 1   | 1  | 1811 | 201.3 | 4.96  | 0    | 94.7  | 95.3  | 98.8  | 106.2 | 98.7  | 106.3 |
| Q91W53 | <i>Golga7</i>   | Golgin subfamily   | High   | 25 | 3  | 3   | 3  | 137  | 15.8  | 7.05  | 33   | 95.8  | 108.7 | 96.9  | 101.5 | 97.1  | 100.1 |
| P09671 | <i>Sod2</i>     | Superoxide         | High   | 33 | 8  | 18  | 8  | 222  | 24.6  | 8.62  | 334  | 98.9  | 107.3 | 90.7  | 104.8 | 101.3 | 96.9  |
| Q3U2A8 | <i>Vars2</i>    | Valine--tRNA       | High   | 1  | 1  | 1   | 1  | 1060 | 118.4 | 7.14  | 47   | 93.5  | 95.4  | 95.6  | 110   | 106.7 | 98.7  |
| P24369 | <i>Ppib</i>     | Peptidyl-prolyl    | High   | 40 | 9  | 17  | 9  | 216  | 23.7  | 9.55  | 292  | 112.2 | 101.4 | 120   | 86.5  | 91.1  | 88.7  |
| Q3THS6 | <i>Mat2a</i>    | S-                 | High   | 43 | 13 | 16  | 13 | 395  | 43.7  | 6.48  | 339  | 104   | 103.2 | 101.5 | 97.7  | 96.4  | 97.2  |
| P49025 | <i>Cit</i>      | Citron Rho-        | High   | 13 | 27 | 34  | 27 | 2055 | 235.2 | 6.54  | 421  | 93.8  | 104.5 | 92.5  | 101.5 | 103.9 | 103.7 |
| P70691 | <i>Ugt1a2</i>   | UDP-               | High   | 7  | 2  | 2   | 1  | 533  | 60.2  | 8.05  | 30   |       |       |       |       |       |       |
| Q8BL86 | <i>Mblac2</i>   | Metallo-beta-      | High   | 33 | 7  | 8   | 7  | 279  | 31.2  | 6.86  | 151  | 96.3  | 96.5  | 102.6 | 97.3  | 102.1 | 105.3 |
| Q9D164 | <i>Fxyd6</i>    | FXDY domain-       | High   | 27 | 2  | 8   | 2  | 94   | 10.4  | 5.11  | 171  | 96.3  | 77.4  | 92.1  | 102.3 | 120.4 | 111.5 |
| Q6P5F7 | <i>Ttyh3</i>    | Protein tweety     | High   | 6  | 3  | 4   | 3  | 524  | 57.7  | 5.85  | 117  | 83.8  | 101.9 | 79    | 107.9 | 115.2 | 112.2 |
| A2A9C3 | <i>Szt2</i>     | KICSTOR            | Low    | 0  | 1  | 1   | 1  | 3431 | 377.4 | 6.19  | 0    | 95    | 102.5 | 92.2  | 107.1 | 107.5 | 95.6  |
| P09411 | <i>Pgk1</i>     | Phosphoglycerat    | High   | 70 | 25 | 103 | 25 | 417  | 44.5  | 7.9   | 1777 | 100   | 103.4 | 97.1  | 100.6 | 100.9 | 98.1  |
| P52196 | <i>Tst</i>      | Thiosulfate        | High   | 42 | 12 | 16  | 12 | 297  | 33.4  | 7.85  | 211  | 97.1  | 108   | 102.5 | 94.6  | 96    | 101.8 |
| Q2NL51 | <i>Gsk3a</i>    | Glycogen           | High   | 30 | 10 | 15  | 7  | 490  | 51.6  | 8.81  | 289  | 95.1  | 98    | 93.7  | 104.3 | 104.4 | 104.5 |
| Q99KP6 | <i>Prpf19</i>   | Pre-mRNA-          | High   | 27 | 10 | 14  | 10 | 504  | 55.2  | 6.61  | 188  | 100.6 | 96.3  | 98.6  | 99.8  | 101   | 103.7 |
| Q91VN4 | <i>Chchd6</i>   | MICOS complex      | High   | 35 | 8  | 12  | 8  | 273  | 29.8  | 8.41  | 166  | 104.3 | 98.7  | 99.9  | 98.6  | 99.2  | 99.3  |
| Q923U0 | <i>Tom11</i>    | TOM1-like          | High   | 8  | 3  | 3   | 3  | 474  | 52.7  | 5.36  | 21   | 91.6  | 97.2  | 99.8  | 100.8 | 98.8  | 111.8 |
| Q8R066 | <i>C1qtnf4</i>  | Complement         | High   | 17 | 4  | 5   | 4  | 326  | 35    | 8.98  | 91   | 96.7  | 96.2  | 102.3 | 101.8 | 101.8 | 101.2 |
| Q99MJ9 | <i>Ddx50</i>    | ATP-dependent      | Low    | 1  | 1  | 1   | 1  | 734  | 82.1  | 9.25  | 0    |       |       |       |       |       |       |
| Q8VD62 | <i>Bles03</i>   | UPF0696 protein    | High   | 18 | 5  | 6   | 5  | 298  | 31.8  | 6.1   | 98   | 92.8  | 101.3 | 90.2  | 105.1 | 103.5 | 107   |
| Q3TW96 | <i>Uap111</i>   | UDP-N-             | High   | 15 | 6  | 7   | 6  | 507  | 56.6  | 5.43  | 127  | 101.8 | 105.4 | 100.8 | 96.1  | 98.9  | 97    |
| P28028 | <i>Braf</i>     | Serine/threonine   | High   | 15 | 9  | 10  | 7  | 804  | 88.7  | 7.65  | 188  | 92.1  | 100   | 91.3  | 99.9  | 112.5 | 104.2 |
| Q9R257 | <i>Hebp1</i>    | Heme-binding       | High   | 43 | 7  | 10  | 7  | 190  | 21.1  | 5.26  | 139  | 102.9 | 102.6 | 98    | 95.3  | 100.7 | 100.5 |
| Q8CIV8 | <i>Tbce</i>     | Tubulin-specific   | High   | 17 | 6  | 7   | 6  | 524  | 59    | 6.29  | 111  | 95.4  | 97.6  | 94.1  | 102   | 104   | 106.8 |
| Q80ZA4 | <i>Pkhd11</i>   | Fibrocystin-L      | Medium | 0  | 1  | 1   | 1  | 4249 | 464.4 | 6.42  | 0    |       |       |       |       |       |       |

|        |                  |                    |        |    |    |    |    |      |       |       |      |       |       |       |       |       |       |
|--------|------------------|--------------------|--------|----|----|----|----|------|-------|-------|------|-------|-------|-------|-------|-------|-------|
| D3YU32 | <i>Tex13c1</i>   | Testis-expressed   | Low    | 3  | 1  | 1  | 1  | 604  | 67.3  | 8.62  | 0    |       |       |       |       |       |       |
| G5E8K5 | <i>Ank3</i>      | Ankyrin-3          | High   | 25 | 39 | 59 | 29 | 1961 | 213.9 | 6.7   | 927  | 100.8 | 104.1 | 97.4  | 99    | 98.2  | 100.6 |
| Q9WU0  | <i>Phf2</i>      | Lysine-specific    | High   | 1  | 1  | 2  | 1  | 1096 | 120.7 | 9.17  | 48   | 99.8  | 112.3 | 96.8  | 94.9  | 96    | 100.3 |
| O88796 | <i>Rpp30</i>     | Ribonuclease P     | Medium | 4  | 1  | 1  | 1  | 268  | 29.5  | 9.06  | 18   |       |       |       |       |       |       |
| P07310 | <i>Ckm</i>       | Creatine kinase    | High   | 10 | 2  | 5  | 1  | 381  | 43    | 7.06  | 40   | 99.6  | 105.7 | 91.6  | 101.1 | 104   | 98    |
| Q8VCC9 | <i>Spon1</i>     | Spondin-1          | High   | 2  | 2  | 2  | 2  | 807  | 90.8  | 6.02  | 22   | 97.4  | 99    | 96.3  | 99.1  | 97.7  | 110.5 |
| Q9D071 | <i>Mms19</i>     | MMS19              | High   | 4  | 3  | 3  | 3  | 1031 | 113   | 6.21  | 83   | 93.8  | 98.5  | 100.9 | 97.8  | 105.9 | 103.2 |
| Q8C4B4 | <i>Unc119b</i>   | Protein unc-119    | Medium | 4  | 1  | 1  | 1  | 251  | 28.3  | 5.72  | 16   | 108.9 | 98.3  | 106.7 | 94.5  | 99    | 92.7  |
| E9PUQ8 | <i>Dgkd</i>      | Diacylglycerol     | High   | 7  | 7  | 8  | 6  | 1220 | 135.1 | 7.81  | 177  | 96    | 95.2  | 90.4  | 102   | 105.1 | 111.3 |
| Q9D9E0 | <i>Slc22a17</i>  | Solute carrier     | High   | 2  | 1  | 1  | 1  | 401  | 43.2  | 8.73  | 26   |       |       |       |       |       |       |
| Q9QVP9 | <i>Ptk2b</i>     | Protein-tyrosine   | High   | 26 | 21 | 32 | 21 | 1009 | 115.7 | 6.35  | 421  | 98.2  | 99.7  | 105.1 | 100   | 97.4  | 99.7  |
| Q9CQ86 | <i>Mien1</i>     | Migration and      | Medium | 6  | 1  | 1  | 1  | 115  | 12.3  | 4.51  | 20   |       |       |       |       |       |       |
| Q91YI0 | <i>Asl</i>       | Argininosuccinat   | High   | 24 | 9  | 11 | 9  | 464  | 51.7  | 6.96  | 153  | 103.1 | 94.6  | 107.9 | 97.6  | 99.7  | 97    |
| Q99K67 | <i>Aass</i>      | Alpha-             | High   | 3  | 2  | 2  | 2  | 926  | 102.9 | 6.87  | 27   |       |       |       |       |       |       |
| Q9Z1Z2 | <i>Strap</i>     | Serine-threonine   | High   | 53 | 13 | 21 | 13 | 350  | 38.4  | 5.12  | 338  | 103.1 | 99    | 98.8  | 97.8  | 99.9  | 101.4 |
| Q8BXZ1 | <i>Tmx3</i>      | Protein disulfide- | High   | 15 | 7  | 9  | 7  | 456  | 51.8  | 5.16  | 173  | 100.6 | 101.9 | 100.3 | 103.1 | 96.6  | 97.5  |
| Q62288 | <i>Spock1</i>    | Testican-1         | Low    | 3  | 1  | 1  | 1  | 442  | 49.5  | 6.01  | 15   | 98.3  | 108.3 | 101.2 | 101.6 | 95.2  | 95.4  |
| Q8BZ81 | <i>Lrrtm3</i>    | Leucine-rich       | Medium | 2  | 1  | 1  | 1  | 582  | 66    | 9.19  | 13   | 98.1  | 94.6  | 99.9  | 105   | 102.3 | 100.2 |
| Q8BHS6 | <i>Armcx3</i>    | Armadillo repeat-  | High   | 16 | 5  | 5  | 5  | 379  | 42.6  | 8.68  | 55   | 99.5  | 90.2  | 112   | 103.5 | 97.4  | 97.3  |
| Q80ZK0 | <i>Mrps10</i>    | 28S ribosomal      | High   | 21 | 2  | 2  | 2  | 160  | 18.7  | 8.84  | 34   | 100.5 | 93.4  | 87.9  | 106.5 | 105   | 106.8 |
| Q9DBR3 | <i>Armc8</i>     | Armadillo repeat-  | High   | 20 | 10 | 13 | 10 | 673  | 75.3  | 6.73  | 213  | 95.9  | 97.5  | 96.7  | 104.3 | 101.9 | 103.6 |
| Q9ER35 | <i>Fn3k</i>      | Fructosamine-3-    | High   | 29 | 7  | 8  | 7  | 309  | 35    | 8.4   | 112  | 95.5  | 106   | 90.2  | 106.2 | 102.4 | 99.5  |
| P47758 | <i>Srprb</i>     | Signal             | High   | 38 | 8  | 9  | 8  | 269  | 29.6  | 9.28  | 160  | 98.9  | 106   | 103.4 | 96.3  | 98    | 97.4  |
| Q9JLT4 | <i>Txnrd2</i>    | Thioredoxin        | High   | 9  | 4  | 4  | 4  | 524  | 56.6  | 8.46  | 76   | 95    | 99    | 88.9  | 106.3 | 106.6 | 104.3 |
| P08551 | <i>Nefl</i>      | Neurofilament      | High   | 52 | 28 | 76 | 25 | 543  | 61.5  | 4.64  | 1540 | 96.5  | 119.6 | 87.6  | 98.9  | 99.7  | 97.7  |
| Q61387 | <i>Cox7a2l</i>   | Cytochrome c       | High   | 20 | 2  | 3  | 2  | 111  | 12.4  | 9.6   | 18   | 96.4  | 106.3 | 95.2  | 101.4 | 102.4 | 98.3  |
| P48036 | <i>Anxa5</i>     | Annexin A5         | High   | 66 | 19 | 33 | 19 | 319  | 35.7  | 4.96  | 880  | 109.8 | 110.6 | 118.4 | 85.1  | 87.3  | 88.9  |
| Q64520 | <i>Guk1</i>      | Guanylate          | High   | 49 | 7  | 9  | 7  | 198  | 21.9  | 6.55  | 142  | 98.8  | 99.6  | 97.6  | 101.5 | 101.5 | 100.9 |
| P14148 | <i>Rpl7</i>      | 60S ribosomal      | High   | 32 | 11 | 16 | 11 | 270  | 31.4  | 10.89 | 206  | 102.6 | 101.7 | 100.9 | 98.7  | 100.4 | 95.6  |
| P28658 | <i>Atxn10</i>    | Ataxin-10          | High   | 30 | 11 | 16 | 11 | 475  | 53.7  | 5.25  | 347  | 103.8 | 97.1  | 107.2 | 95.2  | 100.1 | 96.7  |
| Q8BRF7 | <i>Scfd1</i>     | Sec1 family        | High   | 20 | 8  | 10 | 8  | 639  | 72.3  | 6.38  | 218  | 97.5  | 101.9 | 98    | 100   | 101.1 | 101.5 |
| Q60870 | <i>Reep5</i>     | Receptor           | High   | 19 | 5  | 7  | 5  | 185  | 21    | 8.38  | 89   | 98.4  | 97.4  | 107.5 | 98.8  | 99.1  | 98.7  |
| Q8BGB5 | <i>Limd2</i>     | LIM domain-        | High   | 19 | 2  | 2  | 2  | 128  | 14.2  | 9.04  | 23   | 108.3 | 100.4 | 108   | 93.6  | 90.8  | 99    |
| Q9D0A3 | <i>Arpin</i>     | Arpin OS=Mus       | High   | 5  | 1  | 1  | 1  | 226  | 25.2  | 5.19  | 27   |       |       |       |       |       |       |
| Q3U2V3 | <i>Nudt18</i>    | 8-oxo-dGDP         | High   | 12 | 3  | 3  | 3  | 323  | 35.7  | 6.62  | 79   | 103.7 | 93.4  | 101.6 | 100.6 | 103.6 | 97.1  |
| O88543 | <i>Cops3</i>     | COP9               | High   | 25 | 9  | 12 | 9  | 423  | 47.8  | 6.65  | 240  | 100.3 | 100.7 | 101.9 | 101.4 | 99.1  | 96.6  |
| Q61001 | <i>Lama5</i>     | Laminin subunit    | High   | 1  | 4  | 4  | 4  | 3718 | 403.8 | 6.73  | 102  | 97.2  | 104.5 | 99.3  | 97.3  | 101.9 | 99.7  |
| O54865 | <i>Gucy1b1</i>   | Guanylate          | High   | 18 | 9  | 14 | 9  | 620  | 70.6  | 5.31  | 232  | 101.5 | 97.5  | 92.8  | 104.5 | 99    | 104.7 |
| Q9D8Z1 | <i>Ascc1</i>     | Activating signal  | Medium | 3  | 1  | 1  | 1  | 356  | 41.3  | 6.54  | 14   | 103.1 | 91.8  | 116.3 | 101.7 | 98.4  | 88.6  |
| Q8CHX7 | <i>Rftn2</i>     | Raftlin-2          | High   | 19 | 6  | 7  | 6  | 500  | 54.9  | 5.5   | 121  | 96.3  | 97.6  | 96.3  | 102.5 | 106.2 | 101.1 |
| P54116 | <i>Stom</i>      | Stomatin           | High   | 10 | 3  | 3  | 3  | 284  | 31.4  | 6.93  | 34   | 106.7 | 98.3  | 126.9 | 89.6  | 84.3  | 94.2  |
| Q9D0N7 | <i>Chaf1b</i>    | Chromatin          | Low    | 2  | 1  | 1  | 1  | 572  | 63.1  | 6.55  | 0    | 155.3 | 69.7  | 210.1 | 50.5  | 59    | 55.5  |
| Q3U3Q1 | <i>Ulk3</i>      | Serine/threonine   | High   | 3  | 1  | 2  | 1  | 472  | 53.5  | 7.03  | 49   | 107.3 | 91.5  | 88.1  | 98.7  | 107.9 | 106.5 |
| P62812 | <i>Gabra1</i>    | Gamma-             | High   | 25 | 12 | 19 | 8  | 455  | 51.7  | 9.31  | 211  | 98.9  | 102.6 | 86.9  | 106.7 | 103.1 | 101.8 |
| O88829 | <i>St3gal5</i>   | Lactosylceramid    | High   | 4  | 1  | 1  | 1  | 414  | 47.3  | 8.51  | 23   |       |       |       |       |       |       |
| P01869 | <i>Ighg1</i>     | Ig gamma-1         | High   | 3  | 1  | 2  | 1  | 393  | 43.4  | 6.44  | 50   | 137.7 | 88.4  | 147.5 | 75.5  | 73.9  | 77    |
| P97434 | <i>Mrip</i>      | Myosin             | High   | 15 | 12 | 13 | 12 | 1024 | 116.3 | 6.21  | 213  | 100.3 | 99.1  | 97.7  | 101.9 | 101.2 | 99.7  |
| Q8BFZ9 | <i>Erlin2</i>    | Erlin-2 OS=Mus     | High   | 41 | 14 | 18 | 12 | 340  | 37.8  | 5.5   | 324  | 101.9 | 100.3 | 108.7 | 92.1  | 96.6  | 100.4 |
| C0HKE6 | <i>H2ac13</i>    | Histone H2A        | High   | 38 | 5  | 21 | 1  | 130  | 14.1  | 11.05 | 278  | 111.5 | 94.6  | 132.1 | 87.3  | 90    | 84.5  |
| Q3UPL0 | <i>Sec31a</i>    | Protein transport  | High   | 19 | 21 | 28 | 21 | 1230 | 133.5 | 6.76  | 414  | 102.1 | 101.2 | 97.9  | 103.3 | 98.4  | 97.2  |
| Q9Z0R6 | <i>Itsn2</i>     | Intersectin-2      | High   | 4  | 8  | 10 | 3  | 1659 | 188.8 | 8.13  | 85   | 101.3 | 98    | 98.5  | 102.8 | 105   | 94.4  |
| Q8JZP9 | <i>Gas2l1</i>    | GAS2-like          | High   | 9  | 3  | 3  | 3  | 678  | 72.4  | 10.01 | 43   | 103.9 | 100.8 | 86.2  | 105.2 | 105.4 | 98.4  |
| Q9D172 | <i>Gatd3a</i>    | Glutamine          | High   | 37 | 8  | 22 | 8  | 266  | 28.1  | 8.78  | 467  | 98.3  | 105.1 | 93.2  | 101   | 100.5 | 101.9 |
| P59648 | <i>Fxyd7</i>     | FXYD domain-       | High   | 16 | 1  | 1  | 1  | 80   | 8.5   | 7.84  | 46   | 93.7  | 95.1  | 79.6  | 106.4 | 116.2 | 109   |
| Q6P5D3 | <i>Dhx57</i>     | Putative ATP-      | High   | 2  | 2  | 2  | 1  | 1388 | 155.7 | 7.87  | 77   |       |       |       |       |       |       |
| Q8C129 | <i>Lnpep</i>     | Leucyl-cystinyl    | High   | 6  | 5  | 8  | 5  | 1025 | 117.2 | 5.96  | 112  | 100.7 | 103.1 | 104.6 | 99.3  | 98.6  | 93.8  |
| P07758 | <i>Serpina1a</i> | Alpha-1-           | High   | 35 | 13 | 46 | 4  | 413  | 46    | 5.72  | 900  | 173   | 65.1  | 244.4 | 38.3  | 39.1  | 40    |
| Q3TFQ1 | <i>Spryd7</i>    | SPRY domain-       | High   | 15 | 3  | 3  | 3  | 196  | 21.7  | 6.7   | 66   | 87.8  | 96.2  | 89    | 108.2 | 104.6 | 114.3 |
| Q9EQ28 | <i>Pold3</i>     | DNA polymerase     | Medium | 4  | 1  | 1  | 1  | 462  | 50.8  | 9.32  | 28   |       |       |       |       |       |       |
| Q9JKL5 | <i>Tesc</i>      | Calcineurin B      | High   | 17 | 3  | 3  | 3  | 214  | 24.6  | 4.98  | 36   | 96.4  | 95.3  | 99.1  | 100.2 | 102.1 | 106.9 |
| Q91ZM2 | <i>Sh2b1</i>     | SH2B adapter       | High   | 9  | 4  | 5  | 4  | 756  | 79.6  | 5.25  | 68   | 97.3  | 94.9  | 96.8  | 106.7 | 102.9 | 101.4 |
| Q6NZN0 | <i>Rbm26</i>     | RNA-binding        | High   | 4  | 3  | 3  | 3  | 1012 | 114.1 | 9.16  | 52   | 92.3  | 96.6  | 86.9  | 101.2 | 111.4 | 111.5 |
| Q8CGV2 | <i>Tph2</i>      | Tryptophan 5-      | High   | 3  | 1  | 1  | 1  | 488  | 55.8  | 6.24  | 40   |       |       |       |       |       |       |
| Q8BVG8 | <i>Nat14</i>     | N-                 | High   | 22 | 3  | 3  | 3  | 206  | 21.8  | 10.74 | 41   | 94.9  | 109.3 | 95    | 95.4  | 107.9 | 97.4  |
| P49813 | <i>Tmod1</i>     | Tropomodulin-1     | High   | 25 | 8  | 16 | 7  | 359  | 40.4  | 5.1   | 261  | 98.7  | 104.1 | 82    | 106.6 | 104.3 | 104.2 |
| Q922J3 | <i>Ctip1</i>     | CAP-Gly            | High   | 22 | 30 | 37 | 24 | 1391 | 155.7 | 5.24  | 450  | 100.6 | 99    | 95.8  | 99.6  | 100.8 | 104.2 |
| P47802 | <i>Mtx1</i>      | Metaxin-1          | High   | 37 | 11 | 14 | 11 | 317  | 35.6  | 6.18  | 199  | 99.3  | 101.4 | 95.4  | 100.8 | 100.7 | 102.4 |
| P61205 | <i>Arf3</i>      | ADP-ribosylation   | High   | 59 | 10 | 53 | 1  | 181  | 20.6  | 7.43  | 1210 | 96.7  | 79.9  | 83.8  | 91.2  | 130.6 | 117.9 |



|        |                 |                   |        |    |    |     |    |      |       |       |      |       |       |       |       |       |       |
|--------|-----------------|-------------------|--------|----|----|-----|----|------|-------|-------|------|-------|-------|-------|-------|-------|-------|
| Q9CQ39 | <i>Med21</i>    | Mediator of RNA   | High   | 10 | 1  | 1   | 1  | 144  | 15.6  | 4.53  | 20   | 98.4  | 116.3 | 95.5  | 101.9 | 90    | 97.9  |
| P57784 | <i>Snrpa1</i>   | U2 small nuclear  | High   | 10 | 2  | 2   | 2  | 255  | 28.3  | 8.62  | 46   | 113.3 | 94.6  | 113.5 | 91.2  | 94.7  | 92.8  |
| Q80TL0 | <i>Ppm1e</i>    | Protein           | High   | 10 | 7  | 9   | 7  | 749  | 83.4  | 4.97  | 157  | 90.5  | 96    | 103.4 | 101.7 | 101   | 107.4 |
| Q3TEA8 | <i>Hp1bp3</i>   | Heterochromatin   | High   | 20 | 12 | 16  | 12 | 554  | 60.8  | 9.7   | 171  | 99.5  | 91.9  | 99.1  | 103.5 | 104.4 | 101.5 |
| B9EJA2 | <i>Cttnbp2</i>  | Cortactin-binding | High   | 10 | 15 | 18  | 15 | 1648 | 178.7 | 8.19  | 254  | 90.7  | 98.5  | 89.1  | 106.6 | 109.3 | 105.8 |
| Q64521 | <i>Gpd2</i>     | Glycerol-3-       | High   | 48 | 28 | 56  | 28 | 727  | 80.9  | 6.61  | 1226 | 96.7  | 97.2  | 96    | 103.5 | 104.6 | 102.2 |
| Q61753 | <i>Phgdh</i>    | D-3-              | High   | 37 | 16 | 28  | 16 | 533  | 56.5  | 6.54  | 720  | 99.8  | 103.3 | 108.3 | 95.5  | 95.4  | 97.6  |
| Q9Z2V5 | <i>Hdac6</i>    | Histone           | High   | 3  | 2  | 2   | 2  | 1149 | 125.7 | 5.78  | 22   | 98.5  | 108.4 | 89.4  | 99.5  | 100.3 | 103.9 |
| O09174 | <i>Amacr</i>    | Alpha-            | High   | 6  | 2  | 2   | 2  | 381  | 41.7  | 7.4   | 34   | 102.5 | 96.2  | 95.8  | 100.8 | 105.1 | 99.6  |
| P28651 | <i>Ca8</i>      | Carbonic          | High   | 9  | 2  | 3   | 2  | 291  | 33.1  | 4.78  | 58   | 102.9 | 110.2 | 98.3  | 95.2  | 98    | 95.4  |
| P01831 | <i>Thy1</i>     | Thy-1 membrane    | High   | 45 | 6  | 24  | 6  | 162  | 18.1  | 8.97  | 460  | 99.1  | 101.7 | 94.5  | 103   | 102.6 | 99.2  |
| P37804 | <i>Tagln</i>    | Transgelin        | High   | 39 | 7  | 11  | 6  | 201  | 22.6  | 8.81  | 170  | 119.7 | 102.9 | 116.7 | 72    | 94.6  | 94.1  |
| Q9CXI0 | <i>Coq5</i>     | 2-methoxy-6-      | High   | 15 | 3  | 3   | 3  | 327  | 37.3  | 7.49  | 46   | 94.6  | 100.3 | 95.2  | 101.4 | 111.1 | 97.5  |
| O35465 | <i>Fkbp8</i>    | Peptidyl-prolyl   | High   | 25 | 8  | 14  | 8  | 402  | 43.5  | 5.16  | 281  | 99.9  | 102.1 | 101.2 | 97.7  | 98    | 101.1 |
| O08842 | <i>Gfra2</i>    | GDNF family       | High   | 8  | 3  | 5   | 3  | 464  | 51.7  | 7.75  | 110  | 101.3 | 103.7 | 92.9  | 108   | 100.7 | 93.4  |
| Q9QZ88 | <i>Vps29</i>    | Vacuolar protein  | High   | 20 | 4  | 6   | 4  | 182  | 20.5  | 6.79  | 91   | 97.6  | 101.5 | 95.4  | 101.7 | 103.3 | 100.6 |
| Q9CQA3 | <i>Sdhb</i>     | Succinate         | High   | 37 | 12 | 21  | 12 | 282  | 31.8  | 8.68  | 420  | 95.6  | 102.5 | 91.8  | 103.6 | 103.1 | 103.4 |
| P13439 | <i>Umps</i>     | Uridine 5'-       | High   | 4  | 2  | 2   | 2  | 481  | 52.3  | 6.61  | 48   | 100.3 | 102.5 | 98.2  | 97.9  | 103.1 | 98.1  |
| Q9D3B1 | <i>Hacd2</i>    | Very-long-chain   | High   | 13 | 3  | 4   | 3  | 254  | 28.4  | 9.58  | 111  | 117.6 | 100.5 | 121.2 | 85.9  | 79.5  | 95.2  |
| Q9Z210 | <i>Pex11b</i>   | Peroxisomal       | High   | 9  | 2  | 2   | 2  | 259  | 28.7  | 9.95  | 0    | 87.8  | 97    | 100.7 | 101.5 | 106.5 | 106.5 |
| Q61189 | <i>Clns1a</i>   | Methylosome       | High   | 8  | 1  | 1   | 1  | 236  | 26    | 4.12  | 13   |       |       |       |       |       |       |
| P97930 | <i>Dtymk</i>    | Thymidylate       | High   | 13 | 3  | 4   | 3  | 212  | 23.9  | 7.9   | 57   | 96.2  | 94.4  | 100.8 | 104.7 | 100   | 103.8 |
| Q8BG02 | <i>Ppp2r2c</i>  | Serine/threonine  | High   | 18 | 8  | 11  | 4  | 447  | 51.4  | 6.37  | 130  | 91.1  | 93.2  | 84.9  | 109.4 | 104.9 | 116.5 |
| Q60738 | <i>Slc30a1</i>  | Zinc transporter  | High   | 14 | 5  | 6   | 5  | 503  | 54.7  | 6.62  | 113  | 102.7 | 96.9  | 96.4  | 103.3 | 106.4 | 94.2  |
| Q9JJZ2 | <i>Tuba8</i>    | Tubulin alpha-8   | High   | 43 | 17 | 338 | 5  | 449  | 50    | 5.1   | 6157 | 105.5 | 118.7 | 84.2  | 106.7 | 93.4  | 91.4  |
| Q7TSY6 | <i>Celf4</i>    | CUGBP Elav-like   | High   | 4  | 2  | 2   | 2  | 486  | 51.9  | 8     | 53   | 99.9  | 96.7  | 102.9 | 99.9  | 106   | 94.6  |
| P70444 | <i>Bid</i>      | BH3-interacting   | High   | 18 | 2  | 2   | 2  | 195  | 21.9  | 4.81  | 45   | 100.1 | 101.2 | 89.5  | 103.9 | 101.7 | 103.5 |
| Q640R3 | <i>Hepacam</i>  | Hepatocyte cell   | High   | 21 | 6  | 11  | 6  | 418  | 46.3  | 9.42  | 119  | 96.5  | 104.1 | 97.7  | 100.2 | 99.9  | 101.7 |
| P16390 | <i>Kcna3</i>    | Potassium         | High   | 10 | 5  | 8   | 1  | 528  | 58.5  | 5.33  | 163  |       |       |       |       |       |       |
| Q9JHL1 | <i>Slc9a3r2</i> | Na(+)/H(+)        | Medium | 3  | 1  | 1   | 1  | 337  | 37.4  | 7.59  | 0    |       |       |       |       |       |       |
| B5TVM2 | <i>Ildr2</i>    | Immunoglobulin-   | High   | 7  | 3  | 4   | 3  | 661  | 73.2  | 7.68  | 18   | 88.5  | 98.8  | 85.3  | 127   | 97.2  | 103.2 |
| O70131 | <i>Ninj1</i>    | Ninjurin-1        | Low    | 18 | 1  | 1   | 1  | 152  | 16.5  | 6.55  | 0    |       |       |       |       |       |       |
| Q62446 | <i>Fkbp3</i>    | Peptidyl-prolyl   | High   | 26 | 5  | 7   | 5  | 224  | 25.1  | 9.28  | 117  | 101.9 | 98.9  | 107.1 | 96.2  | 97.7  | 98.3  |
| Q9DCC8 | <i>Tomm20</i>   | Mitochondrial     | High   | 9  | 1  | 2   | 1  | 145  | 16.3  | 8.6   | 101  | 99.7  | 103.4 | 101.6 | 92.7  | 99.5  | 103.1 |
| Q64676 | <i>Ugt8</i>     | 2-                | High   | 5  | 2  | 2   | 2  | 541  | 61.2  | 9.42  | 44   | 95.4  | 104.8 | 77.4  | 94    | 84.1  | 144.3 |
| Q61335 | <i>Bcap31</i>   | B-cell receptor-  | High   | 27 | 6  | 8   | 6  | 245  | 27.9  | 8.7   | 166  | 107.9 | 105.4 | 108.9 | 90    | 94.5  | 93.3  |
| P48962 | <i>Slc25a4</i>  | ADP/ATP           | High   | 58 | 21 | 100 | 11 | 298  | 32.9  | 9.72  | 1499 | 96.8  | 104.4 | 88.7  | 106   | 102.7 | 101.3 |
| Q9QUM7 | <i>Msh5</i>     | MutS protein      | Low    | 1  | 1  | 1   | 1  | 833  | 92.5  | 5.95  | 16   |       |       |       |       |       |       |
| O88342 | <i>Wdr1</i>     | WD repeat-        | High   | 52 | 25 | 65  | 25 | 606  | 66.4  | 6.6   | 1362 | 100.3 | 97    | 106   | 97.7  | 100.4 | 98.6  |
| Q7TNV0 | <i>Dek</i>      | Protein DEK       | High   | 11 | 4  | 6   | 4  | 380  | 43.1  | 6.86  | 88   | 96.5  | 103.1 | 104   | 99.5  | 98    | 99    |
| Q99ME2 | <i>Wdr6</i>     | WD repeat-        | High   | 3  | 2  | 2   | 2  | 1125 | 121.8 | 6.98  | 50   | 108   | 91    | 101.3 | 92.6  | 95.7  | 111.4 |
| Q8C2E7 | <i>Washc5</i>   | WASH complex      | High   | 10 | 9  | 9   | 9  | 1159 | 134   | 7.12  | 141  | 100.1 | 100.7 | 98.1  | 98.5  | 99.6  | 103.1 |
| P68404 | <i>Prkcb</i>    | Protein kinase C  | High   | 39 | 23 | 49  | 16 | 671  | 76.7  | 7.01  | 829  | 98.3  | 101.6 | 94.8  | 102.2 | 101.8 | 101.3 |
| P63028 | <i>Tpt1</i>     | Translationally-  | High   | 27 | 4  | 16  | 4  | 172  | 19.5  | 4.86  | 378  | 97.5  | 98.6  | 92    | 107   | 105.1 | 99.8  |
| Q8C0T1 | <i>Fem1ab</i>   | Protein fem-1     | High   | 3  | 1  | 1   | 1  | 654  | 72.2  | 6.34  | 55   | 97    | 94.8  | 102.5 | 100.7 | 101.6 | 103.3 |
| Q9CPY7 | <i>Lap3</i>     | Cytosol           | High   | 42 | 18 | 31  | 18 | 519  | 56.1  | 7.72  | 584  | 103.9 | 107.6 | 118.8 | 88.8  | 91.3  | 89.7  |
| Q6P5E8 | <i>Dgkq</i>     | Diacylglycerol    | High   | 7  | 5  | 5   | 5  | 934  | 102.2 | 7.52  | 25   | 94.5  | 97.5  | 96.6  | 105.1 | 106.1 | 100.2 |
| Q8BND5 | <i>Qsox1</i>    | Sulfhydryl        | High   | 2  | 2  | 2   | 2  | 748  | 82.7  | 7.17  | 36   | 144.4 | 78.8  | 171.7 | 64.4  | 66.7  | 74.1  |
| P62869 | <i>Elob</i>     | Elongin-B         | High   | 75 | 8  | 15  | 8  | 118  | 13.2  | 5.01  | 300  | 100.7 | 99    | 102.7 | 99.7  | 100.6 | 97.3  |
| O08663 | <i>Metap2</i>   | Methionine        | High   | 9  | 3  | 5   | 3  | 478  | 52.9  | 5.82  | 75   | 102   | 102   | 108.2 | 97.8  | 97.1  | 92.9  |
| P23492 | <i>Pnp</i>      | Purine            | High   | 39 | 8  | 13  | 8  | 289  | 32.3  | 6.16  | 251  | 106   | 107.6 | 131.8 | 84.9  | 84.1  | 85.6  |
| Q62277 | <i>Syp</i>      | Synaptophysin     | High   | 24 | 7  | 28  | 7  | 314  | 34    | 4.94  | 526  | 94.4  | 95.8  | 91.2  | 111.1 | 103.8 | 103.7 |
| P0C7L0 | <i>Wipf3</i>    | WAS/WASL-         | High   | 11 | 5  | 8   | 5  | 485  | 49.4  | 10.18 | 91   | 95.8  | 104.8 | 102.9 | 97.9  | 101.2 | 97.4  |
| Q8K0D7 | <i>Get1</i>     | Guided entry of   | Medium | 8  | 1  | 1   | 1  | 174  | 19.9  | 9.79  | 0    | 92.9  | 105   | 102   | 109.1 | 103.3 | 87.7  |
| Q3TDX8 | <i>Cyb5r4</i>   | Cytochrome b5     | Medium | 2  | 1  | 1   | 1  | 528  | 59.7  | 6.35  | 0    | 99.1  | 105.3 | 102   | 100.5 | 93.8  | 99.2  |
| Q8C5P7 | <i>Tdrp</i>     | Testis            | High   | 16 | 2  | 2   | 2  | 182  | 20.2  | 5.73  | 32   | 102.6 | 101.8 | 103.8 | 94.5  | 94.5  | 102.8 |
| P11276 | <i>Fn1</i>      | Fibronectin       | High   | 11 | 20 | 22  | 20 | 2477 | 272.4 | 5.59  | 286  | 143.9 | 83.2  | 155.3 | 74.6  | 68.4  | 74.5  |
| Q3U0V1 | <i>Khsrp</i>    | Far upstream      | High   | 29 | 19 | 28  | 17 | 748  | 76.7  | 7.33  | 462  | 98.9  | 95.7  | 98.1  | 101.8 | 102.1 | 103.4 |
| Q8VIJ6 | <i>Sfpq</i>     | Splicing factor,  | High   | 23 | 15 | 21  | 15 | 699  | 75.4  | 9.44  | 379  | 98.7  | 95.6  | 96.8  | 104.8 | 102.8 | 101.2 |
| Q6GYP7 | <i>Ralgapa1</i> | Ral GTPase-       | High   | 7  | 13 | 15  | 13 | 2035 | 229.2 | 6.1   | 164  | 97.4  | 100.5 | 94.5  | 105   | 103.6 | 99    |
| P57746 | <i>Atp6v1d</i>  | V-type proton     | High   | 56 | 13 | 28  | 13 | 247  | 28.4  | 9.45  | 465  | 96.7  | 98.6  | 91.5  | 104.8 | 106.4 | 101.9 |
| Q9D5V5 | <i>Cul5</i>     | Cullin-5 OS=Mus   | High   | 27 | 20 | 30  | 20 | 780  | 90.9  | 7.81  | 560  | 98.4  | 100.8 | 96.9  | 100.7 | 101.1 | 102.1 |
| Q8VIG1 | <i>Rest</i>     | RE1-silencing     | Medium | 1  | 1  | 1   | 1  | 1082 | 117.7 | 6.65  | 0    |       |       |       |       |       |       |
| Q9Z103 | <i>Adnp</i>     | Activity-         | High   | 2  | 1  | 1   | 1  | 1108 | 124.2 | 6.86  | 36   | 99.1  | 108.9 | 89.9  | 94.1  | 117.7 | 90.2  |
| Q9CPU0 | <i>Glo1</i>     | Lactoylglutathion | High   | 53 | 8  | 16  | 8  | 184  | 20.8  | 5.47  | 194  | 100.3 | 109.6 | 103.8 | 98.5  | 94.4  | 93.3  |
| Q8VBX6 | <i>Mpdz</i>     | Multiple PDZ      | High   | 2  | 4  | 4   | 4  | 2055 | 218.6 | 5.02  | 44   | 106.1 | 87.1  | 105.1 | 90.7  | 104.6 | 106.4 |
| Q9DC23 | <i>Dnajc10</i>  | DnaJ homolog      | High   | 5  | 3  | 3   | 3  | 793  | 90.5  | 6.96  | 36   | 94.1  | 99.2  | 106.8 | 107.1 | 96.4  | 96.5  |
| Q1LZI2 | <i>Slc35f3</i>  | Putative          | Low    | 2  | 1  | 1   | 1  | 421  | 46.9  | 9.39  | 0    | 92.4  | 111.6 | 105.4 | 100.3 | 82.6  | 107.7 |

|        |                 |                     |        |    |     |     |     |      |       |      |      |       |       |       |       |       |       |
|--------|-----------------|---------------------|--------|----|-----|-----|-----|------|-------|------|------|-------|-------|-------|-------|-------|-------|
| Q78T54 | <i>Vma21</i>    | Vacuolar            | Medium | 12 | 1   | 1   | 1   | 101  | 11.4  | 7.24 | 18   | 92.4  | 84.7  | 97.6  | 109.9 | 108.7 | 106.7 |
| P70303 | <i>Ctps2</i>    | CTP synthase 2      | High   | 3  | 2   | 3   | 1   | 586  | 65.5  | 6.49 | 15   |       |       |       |       |       |       |
| Q9CR56 | <i>Nkiras2</i>  | NF-kappa-B          | Low    | 9  | 1   | 1   | 1   | 191  | 21.5  | 8.05 | 0    | 92.3  | 96.1  | 140.3 | 85.6  | 97.9  | 87.8  |
| Q91Z67 | <i>Srgap2</i>   | SLIT-ROBO Rho       | High   | 16 | 14  | 20  | 14  | 1071 | 120.7 | 6.64 | 343  | 97.5  | 96.3  | 97.1  | 102.1 | 104.3 | 102.7 |
| Q3URE9 | <i>Lingo2</i>   | Leucine-rich        | High   | 11 | 5   | 6   | 4   | 606  | 68    | 8.13 | 66   | 100.8 | 91.9  | 100.4 | 102.3 | 96.7  | 107.9 |
| Q9EQC5 | <i>Scyl1</i>    | N-terminal          | High   | 10 | 7   | 7   | 7   | 806  | 89.1  | 6.44 | 126  | 110.1 | 100.9 | 114.2 | 88.8  | 88.5  | 97.5  |
| Q9CX84 | <i>Rgs19</i>    | Regulator of G-     | High   | 5  | 1   | 1   | 1   | 216  | 24.7  | 6    | 32   | 100.2 | 96.3  | 101.3 | 111.9 | 90.2  | 100.1 |
| Q9CQY2 | <i>Ramac</i>    | RNA guanine-N7      | Medium | 14 | 1   | 1   | 1   | 119  | 14.5  | 8.4  | 16   |       |       |       |       |       |       |
| Q9JKQ4 | <i>Irx5</i>     | Iroquois-class      | Low    | 4  | 1   | 1   | 1   | 484  | 50.7  | 6.42 | 0    | 86.8  | 107.8 | 91.8  | 105.5 | 99.5  | 108.7 |
| Q99J47 | <i>Dhrs7b</i>   | Dehydrogenase/      | High   | 14 | 4   | 4   | 4   | 323  | 35    | 9.63 | 68   | 102.3 | 99.8  | 93.7  | 102.6 | 102.2 | 99.4  |
| P54099 | <i>Polg</i>     | DNA polymerase      | Low    | 2  | 1   | 1   | 1   | 1218 | 136.7 | 6.44 | 0    | 105.5 | 85.1  | 79.6  | 110.2 | 112.5 | 107   |
| Q77QK5 | <i>Ccdc93</i>   | Coiled-coil         | High   | 9  | 6   | 7   | 6   | 629  | 72.6  | 8.29 | 54   | 104.1 | 98.5  | 98.4  | 97.1  | 101.6 | 100.4 |
| Q99NB8 | <i>Ubqln4</i>   | Ubiquilin-4         | High   | 12 | 5   | 16  | 4   | 596  | 63.5  | 5.03 | 304  | 94.4  | 100.1 | 96.9  | 103.9 | 108.3 | 96.4  |
| Q64012 | <i>Raly</i>     | RNA-binding         | High   | 34 | 10  | 13  | 10  | 312  | 33.2  | 8.84 | 100  | 101.7 | 99.3  | 102.2 | 102   | 97.8  | 97    |
| Q99JX7 | <i>Nxf1</i>     | Nuclear RNA         | High   | 9  | 3   | 3   | 3   | 618  | 70.3  | 8.73 | 108  | 96.5  | 100.6 | 97    | 103.9 | 102.7 | 99.3  |
| Q8BMZ5 | <i>Tsen34</i>   | tRNA-splicing       | High   | 9  | 2   | 2   | 2   | 316  | 34.2  | 7.05 | 38   | 90.5  | 112.1 | 103.1 | 99.9  | 97.8  | 96.5  |
| Q9CXS4 | <i>Cenpv</i>    | Centromere          | High   | 37 | 8   | 10  | 8   | 252  | 27.5  | 9.79 | 259  | 92.8  | 92.4  | 97.7  | 109.3 | 107.4 | 100.5 |
| P63323 | <i>Rps12</i>    | 40S ribosomal       | High   | 45 | 6   | 15  | 6   | 132  | 14.5  | 7.24 | 160  | 101.5 | 100.8 | 112.2 | 97.2  | 95.1  | 93.1  |
| O08914 | <i>Faah</i>     | Fatty-acid amide    | High   | 31 | 12  | 16  | 12  | 579  | 63.2  | 7.87 | 394  | 95.8  | 103.5 | 97.4  | 101.5 | 100.1 | 101.6 |
| Q9JLZ3 | <i>Auh</i>      | Methylglutaconyl    | High   | 29 | 9   | 15  | 9   | 314  | 33.4  | 9.51 | 160  | 98.7  | 105   | 89.6  | 100.5 | 101.3 | 104.8 |
| P48774 | <i>Gstm5</i>    | Glutathione S-      | High   | 64 | 13  | 28  | 12  | 224  | 26.6  | 7.21 | 388  | 91.2  | 97.1  | 89.8  | 113.4 | 105.8 | 102.8 |
| P70408 | <i>Cdh10</i>    | Cadherin-10         | High   | 13 | 7   | 9   | 5   | 788  | 88.3  | 4.94 | 213  | 90.2  | 103.3 | 78    | 107.5 | 108.1 | 112.9 |
| Q9JII5 | <i>Dazap1</i>   | DAZ-associated      | High   | 17 | 5   | 6   | 5   | 406  | 43.2  | 8.56 | 128  | 97.8  | 98    | 98.6  | 98.7  | 98.8  | 108   |
| Q9Z224 | <i>Mocs2</i>    | Molybdopterin       | High   | 13 | 1   | 2   | 1   | 88   | 9.7   | 4.61 | 24   | 83.9  | 106.2 | 102.6 | 95.7  | 101.8 | 109.8 |
| Q9CQX8 | <i>Mrps36</i>   | 28S ribosomal       | High   | 37 | 3   | 4   | 3   | 102  | 11.1  | 9.99 | 78   | 93    | 99.9  | 95.1  | 103.7 | 104   | 104.3 |
| Q8BHJ6 | <i>Serinc5</i>  | Serine              | Medium | 2  | 1   | 1   | 1   | 461  | 51.8  | 8.07 | 0    |       |       |       |       |       |       |
| Q9CZ00 | <i>Dbndd1</i>   | Dysbindin           | High   | 11 | 1   | 1   | 1   | 160  | 17.5  | 4.36 | 29   |       |       |       |       |       |       |
| Q07409 | <i>Cntn3</i>    | Contactin-3         | High   | 6  | 5   | 5   | 5   | 1028 | 113.2 | 6.23 | 23   | 101.1 | 100.8 | 92    | 100.7 | 99.2  | 106.2 |
| Q9R1L5 | <i>Mast1</i>    | Microtubule-        | High   | 2  | 3   | 3   | 2   | 1570 | 170.9 | 8.44 | 15   | 84.3  | 87.6  | 94.1  | 95    | 95    | 144   |
| A2AQ25 | <i>Skt</i>      | Sickle tail protein | High   | 11 | 19  | 20  | 19  | 1946 | 212.9 | 7.77 | 287  | 92.6  | 100.3 | 89.5  | 103.9 | 108.6 | 105.1 |
| Q8K2I1 | <i>Fntb</i>     | Protein             | High   | 6  | 2   | 2   | 2   | 437  | 48.8  | 5.8  | 77   | 98.4  | 99.9  | 95.6  | 100   | 106.5 | 99.6  |
| P51141 | <i>Dvl1</i>     | Segment polarity    | High   | 3  | 2   | 2   | 1   | 695  | 75.3  | 7.02 | 30   |       |       |       |       |       |       |
| Q99L04 | <i>Dhrs1</i>    | Dehydrogenase/      | High   | 37 | 10  | 13  | 10  | 313  | 34    | 8.35 | 262  | 141.1 | 96.9  | 177.4 | 58    | 62.9  | 63.7  |
| Q9JM76 | <i>Arpc3</i>    | Actin-related       | High   | 33 | 6   | 12  | 6   | 178  | 20.5  | 8.59 | 258  | 95.5  | 97.2  | 102.5 | 99.1  | 103.2 | 102.5 |
| Q8BHG2 | <i>Czib</i>     | CXXC motif          | High   | 44 | 6   | 7   | 6   | 160  | 18    | 5.12 | 117  | 101.7 | 103.7 | 94.1  | 100.3 | 101.7 | 98.6  |
| Q9DCC4 | <i>Pycr3</i>    | Pyrroline-5-        | High   | 21 | 5   | 6   | 5   | 274  | 28.7  | 7.27 | 94   | 100.7 | 101.4 | 101   | 97.9  | 98    | 101   |
| Q9JHU4 | <i>Dync1h1</i>  | Cytoplasmic         | High   | 46 | 192 | 366 | 192 | 4644 | 531.7 | 6.42 | 6287 | 97.9  | 100.8 | 94.2  | 102.8 | 102.4 | 102   |
| Q8R123 | <i>Flad1</i>    | FAD synthase        | High   | 13 | 5   | 5   | 5   | 492  | 54.7  | 6.64 | 80   | 96.9  | 97    | 95.9  | 102.3 | 104.4 | 103.5 |
| Q9R0G8 | <i>Nrk</i>      | Nik-related         | Low    | 0  | 1   | 1   | 1   | 1455 | 163.5 | 6.48 | 0    |       |       |       |       |       |       |
| P00493 | <i>Hprt1</i>    | Hypoxanthine-       | High   | 38 | 7   | 14  | 7   | 218  | 24.6  | 6.68 | 263  | 103.4 | 99.7  | 98.5  | 97.3  | 102.4 | 98.6  |
| Q8R1I1 | <i>Uqcr10</i>   | Cytochrome b-c1     | High   | 27 | 1   | 3   | 1   | 64   | 7.4   | 9.19 | 106  | 99.4  | 102.3 | 96.9  | 100.3 | 104   | 97.1  |
| Q8CCF0 | <i>Prpf31</i>   | U4/U6 small         | High   | 6  | 3   | 3   | 3   | 499  | 55.4  | 5.67 | 40   | 96.3  | 98.7  | 110   | 101.3 | 93.7  | 100.1 |
| P39054 | <i>Dnm2</i>     | Dynammin-2          | High   | 28 | 24  | 62  | 9   | 870  | 98.1  | 7.43 | 886  | 106.6 | 97.3  | 113.8 | 88.7  | 92.9  | 100.7 |
| Q9CPU4 | <i>Mgst3</i>    | Microsomal          | High   | 9  | 1   | 2   | 1   | 153  | 16.9  | 9.5  | 55   | 103.5 | 114.3 | 102.9 | 108.6 | 88.2  | 82.6  |
| P70699 | <i>Gaa</i>      | Lysosomal           | High   | 8  | 6   | 7   | 6   | 953  | 106.2 | 5.83 | 36   | 95.4  | 95.8  | 101   | 98.2  | 104.4 | 105.2 |
| Q8K2H2 | <i>Otud6b</i>   | Deubiquitinase      | High   | 23 | 4   | 4   | 4   | 294  | 33.7  | 5.53 | 84   | 93.2  | 98.9  | 95.3  | 106.1 | 100.8 | 105.6 |
| Q9R1T2 | <i>Sae1</i>     | SUMO-activating     | High   | 39 | 12  | 15  | 12  | 350  | 38.6  | 5.36 | 241  | 101.5 | 97.9  | 98.3  | 100.4 | 101.1 | 100.7 |
| P58252 | <i>Eef2</i>     | Elongation factor   | High   | 49 | 39  | 79  | 38  | 858  | 95.3  | 6.83 | 1405 | 105.1 | 102.4 | 107.4 | 97.2  | 91.8  | 96.1  |
| O35621 | <i>Pmm1</i>     | Phosphomanno        | High   | 30 | 7   | 9   | 7   | 262  | 29.8  | 5.47 | 198  | 97.9  | 96.9  | 90.9  | 102.6 | 105.1 | 106.7 |
| P28076 | <i>Psmb9</i>    | Proteasome          | High   | 14 | 2   | 2   | 2   | 219  | 23.4  | 5.22 | 36   | 111.4 | 114.8 | 149.8 | 77.2  | 71.9  | 74.9  |
| Q91X97 | <i>Ncald</i>    | Neurocalcin-        | High   | 37 | 7   | 18  | 3   | 193  | 22.2  | 5.35 | 325  | 96.8  | 98.3  | 93.2  | 111.7 | 101.4 | 98.7  |
| Q8BFQ8 | <i>Gatd1</i>    | Glutamine           | High   | 20 | 3   | 7   | 3   | 220  | 23.3  | 7.05 | 143  | 90.6  | 98.6  | 90.2  | 106.6 | 105.7 | 108.3 |
| O88531 | <i>Ppt1</i>     | Palmitoyl-protein   | High   | 16 | 4   | 5   | 4   | 306  | 34.5  | 8    | 102  | 107.2 | 102.4 | 110.3 | 95.2  | 97.3  | 87.6  |
| Q9D710 | <i>Tmx2</i>     | Thioredoxin-        | High   | 20 | 6   | 8   | 6   | 295  | 33.9  | 8.75 | 125  | 96.1  | 103   | 89.7  | 102.7 | 104.7 | 103.8 |
| Q9CQE8 | <i>RTRAF</i>    | RNA                 | High   | 52 | 11  | 22  | 11  | 244  | 28.1  | 6.89 | 477  | 100.7 | 101.1 | 99.3  | 99.5  | 101.3 | 98.2  |
| Q8R3Q0 | <i>Saraf</i>    | Store-operated      | High   | 7  | 2   | 2   | 2   | 334  | 35.8  | 8.19 | 62   | 96.9  | 99.6  | 101.6 | 104   | 99.7  | 98.3  |
| Q8R4X3 | <i>Rbm12</i>    | RNA-binding         | High   | 5  | 4   | 4   | 4   | 992  | 102.7 | 8.32 | 44   | 99.6  | 95    | 95.3  | 97.6  | 106.5 | 106   |
| Q60632 | <i>Nr2f1</i>    | COUP                | Low    | 2  | 1   | 1   | 1   | 422  | 46.1  | 8.25 | 0    | 74.5  | 89.8  | 144.7 | 60.7  | 74.5  | 155.8 |
| Q8C181 | <i>Mbnl2</i>    | Muscleblind-like    | High   | 9  | 4   | 5   | 4   | 373  | 40.1  | 9    | 49   | 103   | 100.3 | 113.8 | 99.3  | 90.3  | 93.3  |
| P03888 | <i>MtnD1</i>    | NADH-               | High   | 5  | 2   | 2   | 2   | 318  | 36    | 6.93 | 16   | 97.3  | 107.2 | 94.4  | 115.5 | 90.8  | 94.9  |
| Q99LD4 | <i>Gps1</i>     | COP9                | High   | 20 | 7   | 10  | 7   | 471  | 53.4  | 6.84 | 101  | 100.9 | 99.4  | 98.8  | 101.5 | 102   | 97.3  |
| Q91YR7 | <i>Prpf6</i>    | Pre-mRNA-           | High   | 7  | 7   | 7   | 7   | 941  | 106.7 | 8.09 | 53   | 96.6  | 100.5 | 94.3  | 102.6 | 102.7 | 103.3 |
| Q6GQS1 | <i>Slc25a23</i> | Calcium-binding     | High   | 28 | 12  | 20  | 10  | 467  | 52.5  | 7.59 | 328  | 96.3  | 102.1 | 95.4  | 105.8 | 98.5  | 101.9 |
| Q8BZQ7 | <i>Anapc2</i>   | Anaphase-           | Low    | 1  | 1   | 1   | 1   | 837  | 95.2  | 5.31 | 0    |       |       |       |       |       |       |
| Q9D428 | <i>GOLGA7B</i>  | Golgin subfamily    | High   | 6  | 1   | 1   | 1   | 167  | 18.3  | 6.01 | 41   | 94    | 97.6  | 100.2 | 104.7 | 100.8 | 102.8 |
| B2RY56 | <i>Rbm25</i>    | RNA-binding         | High   | 4  | 3   | 3   | 3   | 838  | 99.5  | 6.32 | 38   | 102   | 100.5 | 104   | 97.7  | 94.6  | 101.2 |
| Q9JKV1 | <i>Adrm1</i>    | Proteasomal         | High   | 14 | 6   | 6   | 6   | 407  | 42    | 5.07 | 94   | 98.4  | 95.3  | 100   | 101.1 | 103.5 | 101.8 |
| Q6ZQ29 | <i>Taok2</i>    | Serine/threonine    | High   | 6  | 6   | 6   | 6   | 1240 | 139.2 | 7.06 | 54   | 91.9  | 96.8  | 94.8  | 107.2 | 103.5 | 105.8 |

|        |                 |                   |        |    |    |     |    |      |       |      |      |       |       |       |       |       |       |
|--------|-----------------|-------------------|--------|----|----|-----|----|------|-------|------|------|-------|-------|-------|-------|-------|-------|
| Q9CR86 | <i>Carhsp1</i>  | Calcium-          | High   | 18 | 2  | 2   | 2  | 148  | 16.1  | 8.21 | 60   | 98.8  | 115.7 | 101.9 | 91    | 97.6  | 95.1  |
| Q77PD2 | <i>Fam185a</i>  | Protein           | High   | 4  | 1  | 1   | 1  | 378  | 40    | 6.38 | 55   | 92.4  | 102.5 | 88.6  | 106.4 | 107.6 | 102.5 |
| Q9QZ73 | <i>Dcun1d1</i>  | DCN1-like         | High   | 17 | 3  | 5   | 3  | 259  | 30.1  | 5.34 | 162  | 97.2  | 101   | 102.4 | 97.4  | 103.2 | 98.8  |
| Q8C1E7 | <i>Tmem120a</i> | Ion channel       | High   | 8  | 2  | 2   | 2  | 343  | 40.7  | 8.88 | 31   | 123   | 106.4 | 130.6 | 113.7 | 50.2  | 76.2  |
| Q9R013 | <i>Ctsf</i>     | Cathepsin F       | High   | 5  | 2  | 2   | 2  | 462  | 51.6  | 6.55 | 30   | 107.1 | 103.8 | 97.2  | 85    | 101.7 | 105.3 |
| P50171 | <i>Hsd17b8</i>  | Estradiol 17-     | High   | 29 | 5  | 6   | 5  | 259  | 26.6  | 6.54 | 121  | 107.7 | 93.8  | 112   | 96    | 91.5  | 99    |
| P49586 | <i>Pcyt1a</i>   | Choline-          | High   | 12 | 4  | 4   | 4  | 367  | 41.6  | 7.03 | 48   | 105.9 | 94.5  | 109.7 | 96.4  | 96.3  | 97.2  |
| Q6A058 | <i>Armxc2</i>   | Armadillo repeat- | High   | 2  | 1  | 1   | 1  | 784  | 81    | 9.33 | 17   | 106.6 | 98.6  | 89.6  | 99.1  | 98.1  | 108.1 |
| Q9CRA9 | <i>Fgfr1op2</i> | FGFR1             | High   | 7  | 2  | 3   | 2  | 253  | 29.4  | 5.83 | 27   | 91.6  | 100.4 | 91.6  | 101.9 | 99    | 115.5 |
| Q6XUX1 | <i>Dstyk</i>    | Dual              | Low    | 3  | 1  | 1   | 1  | 927  | 104.8 | 6.58 | 0    |       |       |       |       |       |       |
| Q99MS8 | <i>Tpgs1</i>    | Tubulin           | Low    | 5  | 1  | 1   | 1  | 303  | 32.6  | 8.94 | 0    | 111.9 | 95.4  | 114.1 | 86.4  | 94.6  | 97.6  |
| Q91VC7 | <i>Ppp1r14a</i> | Protein           | High   | 7  | 1  | 2   | 1  | 147  | 16.6  | 7.34 | 42   | 98.8  | 112.6 | 103.5 | 93.7  | 95.4  | 96.1  |
| Q8VHQ9 | <i>Acot11</i>   | Acyl-coenzyme     | High   | 10 | 7  | 8   | 7  | 594  | 67.3  | 6.8  | 64   | 97.9  | 109.5 | 98.7  | 99.7  | 97.5  | 96.6  |
| Q8C878 | <i>Uba3</i>     | NEDD8-            | High   | 27 | 8  | 9   | 8  | 462  | 51.7  | 5.45 | 275  | 96.2  | 101.1 | 92.3  | 103.8 | 102.9 | 103.7 |
| P14206 | <i>Rpsa</i>     | 40S ribosomal     | High   | 50 | 12 | 22  | 12 | 295  | 32.8  | 4.87 | 401  | 101.2 | 98.3  | 107.7 | 96.9  | 97.2  | 98.7  |
| Q9JKC8 | <i>Ap3m1</i>    | AP-3 complex      | High   | 30 | 10 | 12  | 7  | 418  | 46.9  | 6.93 | 166  | 106.5 | 96.8  | 115.9 | 90.5  | 93.5  | 96.8  |
| Q3V384 | <i>Afg1l</i>    | AFG1-like         | High   | 5  | 3  | 4   | 3  | 480  | 54.3  | 8.03 | 59   | 111.9 | 102.2 | 107.7 | 99.2  | 89.8  | 89.2  |
| Q9CQM5 | <i>Txndc17</i>  | Thioredoxin       | High   | 32 | 3  | 5   | 3  | 123  | 14    | 4.77 | 96   | 100.5 | 102.1 | 104.4 | 95.2  | 98.6  | 99.1  |
| Q9R0Q9 | <i>Mpdu1</i>    | Mannose-P-        | High   | 4  | 1  | 1   | 1  | 247  | 26.5  | 8.75 | 31   | 107.4 | 100.9 | 112.4 | 98.1  | 91.2  | 90    |
| Q7TMM9 | <i>Tubb2a</i>   | Tubulin beta-2A   | High   | 71 | 24 | 385 | 1  | 445  | 49.9  | 4.89 | 7119 | 90.5  | 94.9  | 90.3  | 110.2 | 111.6 | 102.6 |
| Q8BH69 | <i>Sephs1</i>   | Selenide, water   | High   | 15 | 4  | 4   | 4  | 392  | 42.9  | 5.97 | 113  | 98.2  | 98.1  | 94.1  | 104.9 | 100.3 | 104.4 |
| Q8R0H9 | <i>Gga1</i>     | ADP-ribosylation  | High   | 20 | 9  | 13  | 9  | 635  | 69.9  | 5.27 | 220  | 98.2  | 98.8  | 94.5  | 103.4 | 102.1 | 103   |
| Q6QD59 | <i>Bnip1</i>    | Vesicle transport | High   | 30 | 7  | 7   | 7  | 228  | 26.2  | 8.75 | 67   | 101.3 | 101.7 | 101.8 | 99.2  | 97.6  | 98.5  |
| Q3UHD6 | <i>Snx27</i>    | Sorting nexin-27  | High   | 19 | 11 | 16  | 11 | 539  | 61    | 6.4  | 176  | 97.1  | 98.7  | 99.3  | 102   | 102.6 | 100.3 |
| P10852 | <i>Slc3a2</i>   | 4F2 cell-surface  | High   | 30 | 17 | 28  | 17 | 526  | 58.3  | 5.91 | 500  | 97.8  | 100.4 | 92    | 100.9 | 104.8 | 104.2 |
| Q8BHS3 | <i>Rbm22</i>    | Pre-mRNA-         | High   | 2  | 1  | 1   | 1  | 420  | 46.9  | 8.54 | 28   | 96.4  | 99.6  | 100   | 104.3 | 101.7 | 98    |
| Q61263 | <i>Soat1</i>    | Sterol O-         | High   | 3  | 1  | 1   | 1  | 540  | 63.8  | 9.01 | 26   | 107.4 | 93.2  | 137.7 | 85.3  | 94.1  | 82.3  |
| Q8BVE3 | <i>Atp6v1h</i>  | V-type proton     | High   | 52 | 20 | 43  | 20 | 483  | 55.8  | 6.61 | 910  | 96.9  | 100.2 | 94.3  | 103.1 | 104.6 | 100.9 |
| Q8CHG3 | <i>Gcc2</i>     | GRIP and coiled-  | High   | 7  | 11 | 11  | 11 | 1679 | 194.3 | 5.12 | 99   | 94.9  | 100   | 95.6  | 102.3 | 100.1 | 107   |
| Q60963 | <i>Pla2g7</i>   | Platelet-         | High   | 16 | 6  | 6   | 6  | 440  | 49.2  | 7.12 | 86   | 116.8 | 90    | 144.9 | 83.6  | 77.7  | 86.9  |
| Q3TTY5 | <i>Krt2</i>     | Keratin, type II  | High   | 3  | 3  | 4   | 1  | 707  | 70.9  | 8.06 | 71   | 75.8  | 109   | 75    | 173   | 71    | 96.2  |
| E9PUL5 | <i>Prrt2</i>    | Proline-rich      | High   | 35 | 7  | 21  | 7  | 346  | 35.9  | 4.63 | 328  | 95.2  | 104.8 | 84.4  | 104.5 | 106.6 | 104.4 |
| Q9QUR8 | <i>Sema7a</i>   | Semaphorin-7A     | High   | 16 | 8  | 9   | 8  | 664  | 74.9  | 7.74 | 95   | 100.4 | 104.9 | 87.4  | 104.8 | 100.8 | 101.7 |
| P56212 | <i>Arpp19</i>   | cAMP-regulated    | High   | 40 | 5  | 6   | 4  | 112  | 12.3  | 9.09 | 81   | 97.1  | 105.1 | 84.2  | 111   | 100.5 | 102.2 |
| Q9Z2M6 | <i>Ubl3</i>     | Ubiquitin-like    | High   | 19 | 2  | 2   | 2  | 117  | 13.2  | 6.92 | 39   | 95.7  | 100.2 | 90.2  | 103.4 | 104   | 106.6 |
| P35700 | <i>Prdx1</i>    | Peroxioredoxin-1  | High   | 61 | 12 | 36  | 10 | 199  | 22.2  | 8.12 | 545  | 109.5 | 102.4 | 113.2 | 88.6  | 94.8  | 91.4  |
| Q9R0P5 | <i>Dstn</i>     | Destrin OS=Mus    | High   | 63 | 9  | 23  | 8  | 165  | 18.5  | 7.97 | 357  | 95.3  | 97.5  | 103.2 | 100.6 | 101.7 | 101.7 |
| Q8VCH5 | <i>Rabepk</i>   | Rab9 effector     | High   | 3  | 1  | 1   | 1  | 380  | 41.1  | 5.95 | 20   | 100.2 | 93.2  | 94.9  | 100.7 | 100.1 | 111   |
| P62715 | <i>Ppp2cb</i>   | Serine/threonine  | High   | 49 | 11 | 22  | 2  | 309  | 35.6  | 5.43 | 422  | 94.6  | 98.4  | 90.8  | 99.5  | 105.2 | 111.4 |
| Q9DBG5 | <i>Plin3</i>    | Perilipin-3       | High   | 8  | 3  | 3   | 3  | 437  | 47.2  | 5.62 | 63   | 101.6 | 103.8 | 116   | 92.6  | 93.3  | 92.8  |
| P09240 | <i>Cck</i>      | Cholecystokinin   | Medium | 6  | 1  | 1   | 1  | 115  | 12.8  | 9.35 | 18   | 104.4 | 100.5 | 119.4 | 89.3  | 87.8  | 98.6  |
| Q8C1W1 | <i>Vash1</i>    | Tubuliny-Tyr      | Low    | 5  | 1  | 1   | 1  | 375  | 41.8  | 9.39 | 0    | 99.1  | 106   | 95.9  | 91.4  | 103.8 | 103.8 |
| Q3V1T4 | <i>P3h1</i>     | Prolyl 3-         | Low    | 4  | 1  | 1   | 1  | 739  | 83.6  | 5.14 | 0    |       |       |       |       |       |       |
| Q9VVL2 | <i>Stat2</i>    | Signal            | Medium | 1  | 1  | 1   | 1  | 923  | 105.4 | 5.27 | 0    | 99.4  | 101.5 | 106.3 | 90.9  | 102.5 | 99.4  |
| Q9D0M3 | <i>Cyc1</i>     | Cytochrome c1,    | High   | 40 | 9  | 29  | 9  | 325  | 35.3  | 9.16 | 295  | 96.3  | 100.2 | 93.2  | 102.8 | 104.5 | 103.1 |
| Q9DCJ1 | <i>Mlst8</i>    | Target of         | High   | 15 | 3  | 3   | 3  | 326  | 35.8  | 5.86 | 56   | 93.4  | 106.1 | 92.2  | 96.8  | 108.6 | 102.9 |
| Q99KK7 | <i>Dpp3</i>     | Dipeptidyl        | High   | 37 | 20 | 30  | 20 | 738  | 82.8  | 5.38 | 544  | 97.2  | 99.1  | 95.8  | 101.9 | 102.7 | 103.3 |
| Q8BXV2 | <i>Bri3bp</i>   | BRI3-binding      | High   | 17 | 3  | 6   | 3  | 253  | 28.2  | 9.52 | 159  | 93.3  | 100.6 | 104.1 | 101.1 | 97.6  | 103.4 |
| Q9DBC3 | <i>Cmtr1</i>    | Cap-specific      | High   | 9  | 7  | 7   | 7  | 837  | 95.6  | 7.27 | 68   | 96.1  | 94    | 100.3 | 101.6 | 101.1 | 106.9 |
| Q80ZS3 | <i>Mrps26</i>   | 28S ribosomal     | High   | 25 | 4  | 5   | 4  | 200  | 23.4  | 9.96 | 97   | 96.6  | 99.3  | 90.6  | 103.5 | 105.8 | 104.2 |
| Q99KB8 | <i>Hagh</i>     | Hydroxyacylgluta  | High   | 34 | 8  | 12  | 8  | 309  | 34.1  | 7.75 | 187  | 98.9  | 99    | 104.6 | 103.8 | 97.5  | 96.2  |
| Q5SSZ5 | <i>Tns3</i>     | Tensin-3          | High   | 2  | 3  | 4   | 3  | 1440 | 155.5 | 6.65 | 37   | 98.6  | 99.6  | 108.8 | 98.7  | 97.5  | 96.6  |
| Q6PGE7 | <i>Slc6a7</i>   | Sodium-           | High   | 3  | 2  | 3   | 2  | 637  | 71    | 6.61 | 38   | 86.5  | 99.1  | 112.7 | 109.8 | 98    | 93.9  |
| Q8CJH3 | <i>Plxnb1</i>   | Plexin-B1         | High   | 4  | 8  | 10  | 8  | 2119 | 231.2 | 5.55 | 105  | 103.7 | 100.6 | 105   | 96.2  | 98.6  | 95.9  |
| Q3SXD3 | <i>Hddc2</i>    | 5'-               | High   | 26 | 4  | 4   | 4  | 199  | 22.7  | 5.02 | 113  | 91.5  | 91.5  | 96.2  | 103.7 | 104.9 | 112.2 |
| Q9EPL2 | <i>Clstn1</i>   | Calsyntenin-1     | High   | 13 | 12 | 13  | 12 | 979  | 108.8 | 4.92 | 207  | 100.8 | 99    | 95.6  | 103.5 | 99.9  | 101.3 |
| Q9CX56 | <i>Psmc8</i>    | 26S proteasome    | High   | 24 | 10 | 12  | 10 | 353  | 39.9  | 9.58 | 169  | 100.3 | 99.2  | 102.1 | 101.2 | 98.6  | 98.6  |
| Q9JIG8 | <i>Praf2</i>    | PRA1 family       | High   | 20 | 3  | 4   | 3  | 178  | 19.5  | 9.6  | 53   | 93.6  | 102.6 | 104.2 | 113   | 91.1  | 95.5  |
| Q61548 | <i>Snap91</i>   | Clathrin coat     | High   | 30 | 22 | 61  | 20 | 901  | 91.8  | 4.88 | 1270 | 96.4  | 101.4 | 92.9  | 105.6 | 103.5 | 100.2 |
| Q8BMF3 | <i>Me3</i>      | NADP-             | High   | 31 | 16 | 20  | 15 | 604  | 67.1  | 7.83 | 384  | 95.9  | 104   | 86.9  | 107.7 | 104.2 | 101.4 |
| Q9DCU6 | <i>Mrpl4</i>    | 39S ribosomal     | High   | 9  | 2  | 2   | 2  | 294  | 33.1  | 9.82 | 60   | 102.5 | 101.5 | 96.1  | 97.2  | 96.8  | 105.9 |
| Q6P5F9 | <i>Xpo1</i>     | Exportin-1        | High   | 23 | 19 | 28  | 19 | 1071 | 123   | 6.07 | 548  | 98.7  | 98.1  | 103.1 | 99.2  | 99.8  | 101.2 |
| Q0PMG2 | <i>Mdga1</i>    | MAM domain-       | Medium | 2  | 1  | 1   | 1  | 956  | 106   | 8.31 | 22   |       |       |       |       |       |       |
| Q9R1J0 | <i>Nsdhl</i>    | Sterol-4-alpha-   | High   | 9  | 3  | 5   | 3  | 362  | 40.7  | 7.85 | 69   | 101.6 | 94.8  | 98.1  | 104.8 | 96.7  | 104   |
| Q91VH2 | <i>Snx9</i>     | Sorting nexin-9   | High   | 2  | 1  | 1   | 1  | 595  | 66.5  | 5.52 | 23   | 109.1 | 106.9 | 98.9  | 98.7  | 97    | 89.3  |
| Q01853 | <i>Vcp</i>      | Transitional      | High   | 58 | 39 | 89  | 39 | 806  | 89.3  | 5.26 | 1756 | 101.7 | 100.8 | 102.3 | 97.9  | 99.1  | 98.2  |
| Q35643 | <i>Ap1b1</i>    | AP-1 complex      | High   | 44 | 37 | 85  | 18 | 943  | 103.9 | 5.17 | 1436 | 99.2  | 98.7  | 95.7  | 104.1 | 100.9 | 101.4 |
| Q91ZV0 | <i>Mia2</i>     | Melanoma          | High   | 3  | 4  | 5   | 4  | 1396 | 156.4 | 4.55 | 45   | 97.7  | 101.5 | 100.6 | 102   | 101.7 | 96.5  |

|        |                  |                   |        |    |    |     |    |      |       |       |      |       |       |       |       |       |       |
|--------|------------------|-------------------|--------|----|----|-----|----|------|-------|-------|------|-------|-------|-------|-------|-------|-------|
| P23116 | <i>Eif3a</i>     | Eukaryotic        | High   | 23 | 28 | 36  | 28 | 1344 | 161.8 | 6.77  | 403  | 99.1  | 100.6 | 103.9 | 97.8  | 97.1  | 101.4 |
| Q8BVU5 | <i>Nudt9</i>     | ADP-ribose        | High   | 9  | 3  | 4   | 3  | 350  | 38.6  | 6.76  | 48   | 109.9 | 98.3  | 94.6  | 99.1  | 102   | 96.1  |
| Q9CQQ7 | <i>Atp5pb</i>    | ATP synthase      | High   | 38 | 12 | 30  | 12 | 256  | 28.9  | 9.06  | 358  | 96.7  | 103.4 | 92.4  | 104.6 | 101.1 | 101.8 |
| Q8R1U1 | <i>Cog4</i>      | Conserved         | High   | 4  | 2  | 2   | 2  | 785  | 88.6  | 5.15  | 48   | 103.8 | 98.9  | 89.3  | 108.2 | 90.1  | 109.7 |
| Q6P4T2 | <i>Snrnp200</i>  | U5 small nuclear  | High   | 18 | 32 | 38  | 32 | 2136 | 244.4 | 6.06  | 606  | 101.6 | 98.1  | 101.5 | 98.8  | 100.1 | 100   |
| Q9CPV7 | <i>Zdhhc6</i>    | Palmitoyltransfer | Low    | 5  | 1  | 1   | 1  | 413  | 47.5  | 8.54  | 0    | 121.9 | 88.2  | 163.7 | 72.1  | 74.4  | 79.8  |
| Q9WTN0 | <i>Ggps1</i>     | Geranylgeranyl    | High   | 8  | 2  | 2   | 2  | 300  | 34.7  | 6.46  | 38   |       |       |       |       |       |       |
| Q6ZQ73 | <i>Cand2</i>     | Cullin-associated | High   | 2  | 2  | 4   | 1  | 1235 | 135.5 | 5.58  | 38   | 107.9 | 100.7 | 108.5 | 93.9  | 90.9  | 98    |
| Q91YD9 | <i>Wasl</i>      | Neural Wiskott-   | High   | 18 | 7  | 10  | 7  | 501  | 54.2  | 7.93  | 127  | 96.2  | 95.6  | 100.7 | 103.3 | 103.8 | 100.3 |
| P55302 | <i>Lrpap1</i>    | Alpha-2-          | High   | 19 | 6  | 7   | 6  | 360  | 42.2  | 7.87  | 83   | 106.1 | 96.1  | 112.4 | 94.1  | 96.9  | 94.3  |
| Q64105 | <i>Spr</i>       | Sepiapterin       | High   | 56 | 12 | 22  | 12 | 261  | 27.9  | 5.74  | 432  | 99.6  | 102.5 | 100.4 | 99.1  | 99    | 99.5  |
| Q61550 | <i>Rad21</i>     | Double-strand-    | High   | 9  | 5  | 5   | 5  | 635  | 72    | 4.64  | 66   | 102.1 | 99.9  | 100.9 | 97.5  | 97.8  | 101.7 |
| Q9QZB6 | <i>Nr4a3</i>     | Nuclear receptor  | High   | 1  | 1  | 1   | 1  | 627  | 68.4  | 7.88  | 52   | 80.8  | 80.2  | 90.1  | 101.1 | 139.5 | 108.3 |
| Q8BWT5 | <i>Dip2a</i>     | Disco-interacting | High   | 9  | 10 | 10  | 10 | 1523 | 165.1 | 7.61  | 106  | 93.7  | 100.7 | 94    | 101.2 | 103.2 | 107.2 |
| Q9ESU6 | <i>Brd4</i>      | Bromodomain-      | Medium | 1  | 2  | 2   | 2  | 1400 | 155.8 | 9.19  | 27   | 100.5 | 99.5  | 104.5 | 99    | 93.8  | 102.8 |
| P34928 | <i>Apoc1</i>     | Apolipoprotein    | High   | 18 | 2  | 2   | 2  | 88   | 9.7   | 9.09  | 49   | 196.6 | 67.7  | 209.6 | 41.2  | 41.6  | 43.3  |
| Q07076 | <i>Anxa7</i>     | Annexin A7        | High   | 33 | 15 | 20  | 15 | 463  | 49.9  | 6.18  | 370  | 101.5 | 102.5 | 103.4 | 98.6  | 97    | 97    |
| P26041 | <i>Msn</i>       | Moesin OS=Mus     | High   | 44 | 25 | 36  | 17 | 577  | 67.7  | 6.6   | 575  | 131.7 | 112   | 151.8 | 65.2  | 70.4  | 68.9  |
| Q91X96 | <i>Rabif</i>     | Guanine           | High   | 23 | 2  | 2   | 2  | 123  | 13.9  | 5.52  | 24   | 87.8  | 109.1 | 95.2  | 111.7 | 94.9  | 101.3 |
| Q8CFE4 | <i>Scyl2</i>     | SCY1-like         | High   | 18 | 12 | 13  | 12 | 930  | 103.3 | 8.02  | 211  | 98.1  | 101.5 | 90.2  | 105.2 | 103.2 | 101.8 |
| P52624 | <i>Upp1</i>      | Uridine           | Medium | 2  | 1  | 1   | 1  | 311  | 34.1  | 6.58  | 18   | 121.4 | 117.7 | 159.6 | 69.6  | 71.6  | 60.1  |
| P68510 | <i>Ywhah</i>     | 14-3-3 protein    | High   | 65 | 15 | 103 | 11 | 246  | 28.2  | 4.89  | 1991 | 100.9 | 102.7 | 94.1  | 102.9 | 101.4 | 98    |
| O08553 | <i>Dpysl2</i>    | Dihydropyrimidin  | High   | 68 | 28 | 223 | 24 | 572  | 62.2  | 6.38  | 5519 | 98    | 105.4 | 93.2  | 101.2 | 101.3 | 100.9 |
| Q8C4Q6 | <i>Aida</i>      | Axin interactor,  | High   | 17 | 4  | 4   | 4  | 305  | 34.9  | 6.74  | 46   | 98.6  | 100.9 | 92    | 100.8 | 101.2 | 106.4 |
| Q8R3H7 | <i>Hs2st1</i>    | Heparan sulfate   | Medium | 5  | 1  | 1   | 1  | 356  | 41.8  | 8.57  | 14   | 90.8  | 91.7  | 109.5 | 99.6  | 98    | 110.4 |
| Q8K2I2 | <i>Cchcr1</i>    | Coiled-coil       | Medium | 2  | 1  | 1   | 1  | 770  | 87.1  | 5.96  | 0    | 99.4  | 91.2  | 86.4  | 101.3 | 102.5 | 119.2 |
| Q7TSE6 | <i>Stk38l</i>    | Serine/threonine  | High   | 19 | 8  | 8   | 6  | 464  | 53.7  | 6.96  | 60   | 109.3 | 95.2  | 122.2 | 88.2  | 93.8  | 91.2  |
| Q3TIV5 | <i>Zc3h15</i>    | Zinc finger       | High   | 9  | 3  | 4   | 3  | 426  | 48.3  | 5.3   | 78   | 98.5  | 101.3 | 93.2  | 104.6 | 104.8 | 97.6  |
| Q8BJU0 | <i>Sgta</i>      | Small glutamine-  | High   | 35 | 10 | 14  | 10 | 315  | 34.3  | 5.06  | 185  | 102.9 | 94.3  | 97.8  | 102.9 | 97    | 105.1 |
| Q9CZE3 | <i>Rab32</i>     | Ras-related       | Medium | 5  | 1  | 1   | 1  | 223  | 25.1  | 6.68  | 13   | 110.4 | 106.5 | 127.5 | 78    | 86.5  | 91.1  |
| Q0V8T9 | <i>Cntnap5a</i>  | Contactin-        | High   | 2  | 2  | 2   | 2  | 1304 | 145.6 | 6.28  | 0    | 99.7  | 91.1  | 99.4  | 96.4  | 99.4  | 114   |
| Q8R3G1 | <i>Ppp1r8</i>    | Nuclear inhibitor | Medium | 7  | 1  | 1   | 1  | 351  | 38.5  | 7.37  | 0    |       |       |       |       |       |       |
| Q8BVL3 | <i>Snx17</i>     | Sorting nexin-17  | High   | 13 | 4  | 5   | 4  | 470  | 52.8  | 7.49  | 89   | 97.7  | 95.2  | 99.4  | 101.4 | 101.1 | 105.2 |
| Q8K1B8 | <i>Fermt3</i>    | Fermitin family   | High   | 14 | 7  | 9   | 7  | 665  | 75.6  | 7.05  | 87   | 117.8 | 105.1 | 128.5 | 81.6  | 83.7  | 83.2  |
| Q91WN1 | <i>Dnajc9</i>    | DnaJ homolog      | High   | 9  | 2  | 3   | 2  | 259  | 30    | 5.94  | 77   | 112.6 | 104.8 | 118.6 | 85.7  | 88.1  | 90.2  |
| Q8BYY9 | <i>Serpina3b</i> | Serine protease   | Low    | 3  | 1  | 1   | 1  | 420  | 47.4  | 7.17  | 0    | 106.2 | 104.1 | 91    | 110.5 | 98.8  | 89.4  |
| P11031 | <i>Sub1</i>      | Activated RNA     | High   | 44 | 5  | 10  | 5  | 127  | 14.4  | 9.6   | 167  | 106.4 | 94.4  | 113.6 | 97.7  | 94.7  | 93.1  |
| Q8K0C4 | <i>Cyp51a1</i>   | Lanosterol 14-    | High   | 14 | 5  | 5   | 5  | 503  | 56.7  | 8.41  | 110  | 97.2  | 96.9  | 92.5  | 105.9 | 100.9 | 106.6 |
| P56387 | <i>Dynlt3</i>    | Dynein light      | High   | 28 | 2  | 2   | 2  | 116  | 12.9  | 5.12  | 62   | 91.1  | 99.2  | 99.6  | 93.5  | 91.7  | 124.9 |
| Q3U7R1 | <i>Esyt1</i>     | Extended          | High   | 6  | 5  | 6   | 5  | 1092 | 121.5 | 5.95  | 105  | 112   | 107.2 | 105.2 | 87.9  | 87.9  | 99.8  |
| Q9CQM9 | <i>Glx3</i>      | Glutaredoxin-3    | High   | 39 | 10 | 21  | 10 | 337  | 37.8  | 5.59  | 383  | 104.4 | 99.2  | 104.6 | 96.5  | 96.6  | 98.7  |
| Q8R1N4 | <i>Nudcd3</i>    | NudC domain-      | High   | 27 | 8  | 11  | 8  | 363  | 40.9  | 5.26  | 179  | 98.7  | 101.3 | 95.2  | 102.6 | 99.9  | 102.2 |
| Q9EPU0 | <i>Upf1</i>      | Regulator of      | High   | 22 | 18 | 23  | 18 | 1124 | 123.9 | 6.61  | 221  | 100.7 | 99.7  | 100.4 | 101.3 | 98.3  | 99.7  |
| A2ALU4 | <i>Shroom2</i>   | Protein Shroom2   | High   | 7  | 9  | 10  | 9  | 1481 | 164.6 | 6.7   | 179  | 98.1  | 103.8 | 95.7  | 99.6  | 100.5 | 102.3 |
| P53702 | <i>Hccs</i>      | Cytochrome c-     | High   | 20 | 5  | 5   | 5  | 272  | 31    | 7.12  | 54   | 97.8  | 101.6 | 94.2  | 103.2 | 100.3 | 102.8 |
| Q924L1 | <i>Letmd1</i>    | LETM1 domain-     | High   | 9  | 3  | 3   | 3  | 360  | 41.7  | 10.54 | 73   | 96.5  | 102.7 | 95.2  | 102.3 | 105.8 | 97.7  |
| Q921N7 | <i>Tmem70</i>    | Transmembrane     | Medium | 4  | 1  | 1   | 1  | 253  | 28.3  | 7.47  | 0    |       |       |       |       |       |       |
| Q9CQH7 | <i>Btf3l4</i>    | Transcription     | High   | 18 | 2  | 2   | 2  | 158  | 17.3  | 6.35  | 75   | 95.4  | 110.6 | 86.6  | 109.8 | 99.9  | 97.7  |
| P50608 | <i>Fmod</i>      | Fibromodulin      | Low    | 2  | 1  | 1   | 1  | 376  | 43    | 6.04  | 23   | 119   | 118.5 | 51.9  | 56.1  | 126.3 | 128.3 |
| Q8VE88 | <i>Fam114a2</i>  | Protein           | High   | 12 | 4  | 5   | 4  | 497  | 54    | 4.93  | 166  | 95.5  | 102.7 | 95.9  | 101   | 105.7 | 99.1  |
| Q9R1T4 | <i>Septin6</i>   | Septin-6          | High   | 51 | 18 | 47  | 10 | 434  | 49.6  | 6.43  | 877  | 96.2  | 102   | 91.9  | 105.3 | 101.9 | 102.7 |
| P56375 | <i>Acyp2</i>     | Acylphosphatase   | High   | 34 | 3  | 3   | 3  | 106  | 11.9  | 9.26  | 48   | 95.5  | 108   | 83.5  | 101.8 | 106.6 | 104.5 |
| Q9D5V6 | <i>Syap1</i>     | Synapse-          | High   | 11 | 4  | 4   | 4  | 365  | 41.3  | 4.54  | 44   | 101.5 | 98.8  | 98    | 101.4 | 102.6 | 97.7  |
| Q8BGH4 | <i>Reep1</i>     | Receptor          | High   | 9  | 2  | 2   | 2  | 201  | 22.3  | 9.5   | 44   | 96.5  | 96.3  | 97    | 102.4 | 100.7 | 107.2 |
| Q9R1K9 | <i>Cetn2</i>     | Centrin-2         | High   | 19 | 3  | 5   | 3  | 172  | 19.8  | 5     | 62   | 99.7  | 94.7  | 109.3 | 93.8  | 100.9 | 101.7 |
| Q7TSV9 | <i>Enkd1</i>     | Enkurin domain-   | Low    | 2  | 1  | 1   | 1  | 346  | 38.9  | 10.32 | 0    |       |       |       |       |       |       |
| P63054 | <i>Pcp4</i>      | Calmodulin        | High   | 58 | 4  | 16  | 4  | 62   | 6.8   | 6.71  | 220  | 86.1  | 94.4  | 79.8  | 111.4 | 113.3 | 115.1 |
| Q566J8 | <i>Coq8b</i>     | Atypical kinase   | High   | 4  | 2  | 2   | 2  | 533  | 59.2  | 7.93  | 42   | 87.5  | 98.9  | 92.8  | 109.1 | 106.5 | 105.1 |
| P97813 | <i>Pld2</i>      | Phospholipase     | High   | 2  | 1  | 1   | 1  | 933  | 106.1 | 7.39  | 29   |       |       |       |       |       |       |
| Q9D2P8 | <i>Mobp</i>      | Myelin-           | High   | 14 | 3  | 5   | 3  | 170  | 19.2  | 11.14 | 94   | 79.8  | 99.2  | 147.1 | 114.4 | 73.1  | 86.3  |
| O08795 | <i>Prkcsb</i>    | Glucosidase 2     | High   | 15 | 10 | 14  | 10 | 521  | 58.8  | 4.46  | 214  | 100.6 | 100.6 | 105.4 | 97.2  | 96.9  | 99.3  |
| O54910 | <i>Nfkbia</i>    | NF-kappa-B        | Low    | 6  | 1  | 1   | 1  | 364  | 39.2  | 4.75  | 0    |       |       |       |       |       |       |
| Q9JL8  | <i>Sars2</i>     | Serine--tRNA      | High   | 4  | 2  | 2   | 2  | 518  | 58.3  | 7.9   | 25   | 94.7  | 100   | 101   | 100.8 | 102.2 | 101.2 |
| Q60649 | <i>Cipb</i>      | Caseinolytic      | High   | 20 | 9  | 10  | 9  | 677  | 76    | 8.51  | 185  | 97.4  | 98.2  | 99.8  | 99.8  | 101.6 | 103.2 |
| Q64096 | <i>Mcf2l</i>     | Guanine           | High   | 3  | 3  | 3   | 3  | 1149 | 129   | 5.9   | 40   | 99.4  | 103.6 | 95.7  | 98.2  | 102.1 | 101   |
| Q8BG51 | <i>Rhot1</i>     | Mitochondrial     | High   | 18 | 8  | 15  | 6  | 631  | 72.2  | 6.49  | 306  | 89.2  | 101.7 | 92.1  | 99.4  | 108.5 | 109   |
| Q99K46 | <i>Usp11</i>     | Ubiquitin         | High   | 10 | 9  | 13  | 9  | 921  | 105.3 | 4.96  | 153  | 97.8  | 94.3  | 95.7  | 103.4 | 105.7 | 103.1 |
| Q80SW1 | <i>Ahcy1l</i>    | S-                | High   | 41 | 23 | 52  | 11 | 530  | 58.9  | 6.89  | 687  | 100.2 | 96.3  | 103.3 | 99.1  | 100.2 | 101   |

|         |                |                  |        |    |    |     |    |      |       |       |      |       |       |       |       |       |       |
|---------|----------------|------------------|--------|----|----|-----|----|------|-------|-------|------|-------|-------|-------|-------|-------|-------|
| Q9D8B3  | <i>Chmp4b</i>  | Charged          | High   | 36 | 9  | 12  | 9  | 224  | 24.9  | 4.82  | 165  | 108.7 | 103.1 | 101.1 | 96.6  | 96.5  | 94    |
| Q9Z1D1  | <i>Eif3g</i>   | Eukaryotic       | High   | 16 | 4  | 6   | 4  | 320  | 35.6  | 5.9   | 87   | 98.9  | 97.8  | 103.1 | 100.2 | 101   | 99    |
| Q7TSQ8  | <i>Pdpr</i>    | Pyruvate         | High   | 15 | 11 | 13  | 11 | 878  | 99.2  | 6.35  | 224  | 94.9  | 95.3  | 96    | 102.6 | 104.8 | 106.5 |
| Q8BSQ9  | <i>Pbrm1</i>   | Protein          | Medium | 1  | 1  | 1   | 1  | 1634 | 187.1 | 6.9   | 0    |       |       |       |       |       |       |
| P09528  | <i>Fth1</i>    | Ferritin heavy   | High   | 67 | 12 | 17  | 12 | 182  | 21.1  | 5.88  | 212  | 103.1 | 100.3 | 123.9 | 92    | 88.6  | 92    |
| Q8BMP6  | <i>Acbd3</i>   | Golgi resident   | High   | 11 | 4  | 5   | 4  | 525  | 60.1  | 5.11  | 109  | 105.7 | 94.4  | 110.2 | 84.6  | 104.4 | 100.6 |
| P0C0S6  | <i>H2az1</i>   | Histone H2A.Z    | High   | 31 | 4  | 15  | 2  | 128  | 13.5  | 10.58 | 243  | 101   | 100.8 | 106.7 | 95.4  | 98.6  | 97.5  |
| P70290  | <i>Mpp1</i>    | 55 kDa           | High   | 28 | 9  | 10  | 9  | 466  | 52.2  | 7.2   | 156  | 101   | 104.6 | 92.2  | 102.3 | 93.7  | 106.2 |
| Q8BXN9  | <i>Tmem87a</i> | Transmembrane    | High   | 3  | 2  | 2   | 2  | 555  | 63.3  | 6.67  | 35   |       |       |       |       |       |       |
| Q9WVF8  | <i>Tusc2</i>   | Tumor            | High   | 34 | 2  | 2   | 2  | 110  | 12.1  | 9.69  | 49   | 94.1  | 95.4  | 90.5  | 108.8 | 110.5 | 100.6 |
| O88502  | <i>Pde8a</i>   | High affinity    | High   | 2  | 1  | 1   | 1  | 823  | 93.1  | 5.85  | 46   | 100.3 | 99.5  | 93.4  | 120.4 | 97.1  | 89.3  |
| A2BDX3  | <i>Mocs3</i>   | Adenylyltransfer | High   | 3  | 1  | 2   | 1  | 460  | 49.3  | 7.49  | 37   |       |       |       |       |       |       |
| Q5U4E0  | <i>Lhfp14</i>  | LHFPL tetraspan  | High   | 6  | 2  | 3   | 2  | 247  | 27    | 7.18  | 17   | 93.6  | 102.9 | 90.9  | 101.9 | 102.3 | 108.5 |
| Q9Z2V6  | <i>Hdac5</i>   | Histone          | High   | 1  | 1  | 2   | 1  | 1113 | 120.9 | 6.2   | 34   | 96.6  | 92    | 88.5  | 107.6 | 107   | 108.3 |
| Q9D6K8  | <i>Fundc2</i>  | FUN14 domain-    | High   | 16 | 3  | 5   | 3  | 151  | 16.6  | 9.7   | 208  | 95.8  | 104.4 | 86.7  | 108.2 | 103.1 | 101.7 |
| O35226  | <i>Psmc4</i>   | 26S proteasome   | High   | 32 | 7  | 10  | 7  | 376  | 40.7  | 4.79  | 258  | 100.8 | 100.1 | 98.4  | 100.9 | 105.2 | 94.6  |
| Q8K0S0  | <i>Phyhip</i>  | Phytanoyl-CoA    | High   | 41 | 14 | 26  | 12 | 330  | 37.5  | 7.01  | 386  | 95.9  | 99.7  | 94.1  | 104.6 | 103.4 | 102.3 |
| O54724  | <i>Cavin1</i>  | Caveolae-        | High   | 13 | 4  | 6   | 4  | 392  | 43.9  | 5.52  | 86   | 108.1 | 98.9  | 111.1 | 90.4  | 91.2  | 100.3 |
| Q60766  | <i>Irgm1</i>   | Immunity-related | High   | 13 | 6  | 7   | 6  | 409  | 46.5  | 8.28  | 104  | 108   | 111.4 | 153.4 | 74    | 72.1  | 81    |
| P25911  | <i>Lyn</i>     | Tyrosine-protein | High   | 8  | 4  | 7   | 2  | 512  | 58.8  | 7.15  | 86   | 114   | 102.6 | 132.6 | 82.3  | 84.1  | 84.5  |
| Q8C863  | <i>Itch</i>    | E3 ubiquitin-    | High   | 8  | 5  | 7   | 3  | 864  | 98.9  | 6.28  | 123  | 96.1  | 95.6  | 92.5  | 99.8  | 104.9 | 111.2 |
| Q8BH79  | <i>Ano10</i>   | Anoctamin-10     | High   | 3  | 2  | 4   | 2  | 659  | 76.1  | 6.7   | 149  | 97.9  | 101.7 | 94.8  | 99.9  | 98.3  | 107.4 |
| P62320  | <i>Snrpd3</i>  | Small nuclear    | High   | 32 | 3  | 7   | 3  | 126  | 13.9  | 10.32 | 123  | 98.8  | 101.5 | 101.6 | 101.9 | 101.9 | 94.3  |
| Q5EBJ4  | <i>Ermn</i>    | Ermin OS=Mus     | High   | 51 | 11 | 15  | 11 | 281  | 32.1  | 4.59  | 242  | 93.9  | 113.3 | 101.9 | 94.5  | 95.5  | 100.8 |
| Q77PS5  | <i>C2cd5</i>   | C2 domain-       | High   | 7  | 6  | 6   | 6  | 1016 | 111.6 | 5.78  | 96   | 96.5  | 97.7  | 100.1 | 102.8 | 99.8  | 103   |
| Q9WTQ8  | <i>Timm23</i>  | Mitochondrial    | High   | 8  | 1  | 3   | 1  | 209  | 22    | 9.13  | 100  | 95.8  | 101.4 | 88.9  | 104.2 | 110.3 | 99.4  |
| Q9D6Y4  | <i>Borcs8</i>  | BLOC-1-related   | High   | 15 | 1  | 1   | 1  | 120  | 13.6  | 6.54  | 15   |       |       |       |       |       |       |
| A2AFR3  | <i>Frmpr4</i>  | FERM and PDZ     | Medium | 2  | 1  | 1   | 1  | 1320 | 144.9 | 5.25  | 15   | 114.5 | 100   | 112.3 | 87.2  | 84.6  | 101.5 |
| P46412  | <i>Gpx3</i>    | Glutathione      | High   | 5  | 1  | 2   | 1  | 226  | 25.4  | 8.22  | 42   | 134.9 | 87.3  | 172.8 | 72.9  | 62    | 70    |
| P41241  | <i>Csk</i>     | Tyrosine-protein | High   | 9  | 4  | 4   | 4  | 450  | 50.7  | 7.06  | 27   | 92.5  | 109.1 | 103.2 | 100   | 98.8  | 96.3  |
| Q9QZB7  | <i>Actr10</i>  | Actin-related    | High   | 41 | 12 | 18  | 12 | 417  | 46.2  | 7.61  | 333  | 97.1  | 100.6 | 95.2  | 100.8 | 103   | 103.4 |
| Q64314  | <i>Cd34</i>    | Hematopoietic    | High   | 11 | 4  | 6   | 4  | 382  | 41    | 5.3   | 65   | 98.5  | 107.9 | 88.9  | 109.5 | 93.7  | 101.5 |
| O35181  | <i>Nrg3</i>    | Pro-neuregulin-  | Medium | 2  | 1  | 1   | 1  | 713  | 77.3  | 7.15  | 16   | 92.6  | 102.4 | 103.2 | 109.4 | 101.5 | 90.9  |
| Q91YY4  | <i>Atpaf2</i>  | ATP synthase     | High   | 12 | 3  | 4   | 3  | 289  | 33.3  | 6.32  | 40   | 95.8  | 101.9 | 93    | 103.9 | 104.5 | 100.9 |
| P07091  | <i>S100a4</i>  | Protein S100-A4  | High   | 17 | 2  | 2   | 2  | 101  | 11.7  | 5.31  | 26   | 120.2 | 120.5 | 164   | 58    | 70.1  | 67.3  |
| P63087  | <i>Ppp1cc</i>  | Serine/threonine | High   | 52 | 15 | 32  | 3  | 323  | 37    | 6.54  | 553  | 98.3  | 99.7  | 89.1  | 97.5  | 107.2 | 108.1 |
| P08556  | <i>Nras</i>    | GTPase NRas      | High   | 61 | 7  | 18  | 1  | 189  | 21.2  | 5.17  | 420  | 92.3  | 96.1  | 104.6 | 94.7  | 106.7 | 105.4 |
| Q6WVG3  | <i>Kctd12</i>  | BTB/POZ          | High   | 39 | 7  | 9   | 7  | 327  | 35.9  | 5.81  | 173  | 102   | 95.9  | 113.9 | 94.8  | 91.1  | 102.3 |
| Q9ERG2  | <i>Strn3</i>   | Striatin-3       | High   | 9  | 6  | 8   | 5  | 796  | 87.1  | 5.29  | 115  | 97.4  | 97.4  | 90    | 103.6 | 105.1 | 106.5 |
| Q9CX13  | <i>Cnih4</i>   | Protein          | High   | 14 | 1  | 1   | 1  | 139  | 16.1  | 6.49  | 16   | 88.7  | 88.2  | 87.9  | 110.9 | 102.9 | 121.4 |
| Q3UIU2  | <i>Ndufb6</i>  | NADH             | High   | 31 | 4  | 10  | 4  | 128  | 15.5  | 9.79  | 204  | 92.1  | 99    | 89.1  | 103.5 | 110.7 | 105.6 |
| Q6PEB6  | <i>Mob4</i>    | MOB-like protein | High   | 33 | 5  | 8   | 5  | 225  | 26    | 5.78  | 72   | 98.7  | 95.8  | 98.8  | 103.8 | 99.9  | 103   |
| P0C027  | <i>Nudt10</i>  | Diphosphoinosit  | High   | 21 | 3  | 3   | 2  | 164  | 18.6  | 5.69  | 52   | 95.9  | 97.5  | 94.4  | 99.8  | 103.9 | 108.4 |
| Q61626  | <i>Grik5</i>   | Glutamate        | Medium | 1  | 1  | 1   | 1  | 979  | 109.2 | 8.21  | 18   | 97.1  | 101.3 | 96.3  | 105.3 | 96.9  | 103.3 |
| P61922  | <i>Abat</i>    | 4-aminobutyrate  | High   | 60 | 23 | 49  | 23 | 500  | 56.4  | 8.09  | 1000 | 93.8  | 102.9 | 94.3  | 105.7 | 98.2  | 105.1 |
| P00405  | <i>Mtco2</i>   | Cytochrome c     | High   | 28 | 5  | 31  | 5  | 227  | 26    | 4.73  | 682  | 93.9  | 104   | 87.4  | 104.4 | 107.2 | 103.2 |
| Q62193  | <i>Rpa2</i>    | Replication      | Medium | 3  | 1  | 1   | 1  | 270  | 29.7  | 6.15  | 31   | 108.1 | 99.6  | 137   | 81.7  | 84.7  | 88.9  |
| P52293  | <i>Kpna2</i>   | Importin subunit | High   | 3  | 1  | 1   | 1  | 529  | 57.9  | 5.68  | 42   | 85.9  | 102.5 | 96.7  | 99.7  | 117.2 | 98    |
| Q9DAR7  | <i>Dcps</i>    | m7GpppX          | High   | 20 | 5  | 8   | 5  | 338  | 39    | 6.48  | 158  | 106.8 | 103.4 | 104.1 | 95.7  | 93.2  | 96.8  |
| Q9Z1E4  | <i>Gys1</i>    | Glycogen         | High   | 2  | 2  | 2   | 2  | 738  | 83.9  | 6.11  | 29   | 102   | 99.1  | 112.2 | 90    | 100   | 96.6  |
| Q8JZK9  | <i>Hmgcs1</i>  | Hydroxymethylgl  | High   | 14 | 6  | 6   | 6  | 520  | 57.5  | 5.99  | 83   | 88.3  | 98.3  | 88.7  | 104   | 109.5 | 111.2 |
| Q9ESN4  | <i>C1ql3</i>   | Complement       | High   | 4  | 1  | 1   | 1  | 255  | 26.7  | 6.79  | 18   |       |       |       |       |       |       |
| Q9QXV0  | <i>Pcsk1n</i>  | ProSAAS          | High   | 22 | 4  | 8   | 4  | 258  | 27.3  | 5.85  | 151  | 105.1 | 93.9  | 112.7 | 95.8  | 98.6  | 93.9  |
| Q8VDI7  | <i>Ubc1</i>    | Ubiquitin-       | High   | 7  | 2  | 3   | 2  | 409  | 45.5  | 4.97  | 75   | 90.4  | 94.7  | 82.6  | 114.9 | 106   | 111.4 |
| Q8BK75  | <i>Elp6</i>    | Elongator        | High   | 4  | 1  | 2   | 1  | 266  | 29.3  | 6.61  | 23   |       |       |       |       |       |       |
| Q3UJZP4 | <i>Svip</i>    | Small VCP/p97-   | High   | 14 | 1  | 2   | 1  | 77   | 8.4   | 8.91  | 70   | 90.5  | 113   | 89.2  | 99.6  | 106.5 | 101.2 |
| Q3UD01  | <i>Atn7l3b</i> | Ataxin-7-like    | Medium | 10 | 1  | 1   | 1  | 97   | 10.7  | 4.32  | 27   | 102.9 | 94.7  | 94.9  | 104.7 | 103.2 | 99.5  |
| Q8WTY4  | <i>Ciapin1</i> | Anamorsin        | High   | 14 | 4  | 4   | 4  | 309  | 33.4  | 5.2   | 51   | 96.4  | 101.5 | 95.2  | 106.9 | 99.3  | 100.6 |
| Q61699  | <i>Hsph1</i>   | Heat shock       | High   | 53 | 40 | 72  | 38 | 858  | 96.3  | 5.53  | 1284 | 99.3  | 101.3 | 104.5 | 97.4  | 98.9  | 98.6  |
| Q9WTS5  | <i>Tenm2</i>   | Teneurin-2       | High   | 4  | 8  | 10  | 8  | 2764 | 306.3 | 6.68  | 131  | 92.2  | 90.3  | 103.3 | 104.3 | 101.2 | 108.8 |
| Q7TNR6  | <i>Igsf21</i>  | Immunoglobulin   | High   | 12 | 5  | 13  | 5  | 468  | 51.9  | 6.95  | 134  | 97.7  | 95.1  | 97.1  | 102   | 105.3 | 102.8 |
| Q8VDN2  | <i>Atp1a1</i>  | Sodium/potassiu  | High   | 50 | 51 | 353 | 32 | 1023 | 112.9 | 5.45  | 8450 | 91.6  | 103.9 | 75.7  | 114.7 | 106.7 | 107.3 |
| O70585  | <i>Dtnb</i>    | Dystrobrevin     | High   | 7  | 5  | 6   | 1  | 659  | 74.4  | 8.62  | 128  | 108   | 91.5  | 114.3 | 92.4  | 98.6  | 95.2  |
| Q61768  | <i>Kif5b</i>   | Kinesin-1 heavy  | High   | 38 | 29 | 43  | 17 | 963  | 109.5 | 6.44  | 765  | 100.4 | 102.6 | 104.5 | 94.5  | 99.3  | 98.6  |
| Q9D8M3  | <i>Slc48a1</i> | Heme             | High   | 8  | 1  | 1   | 1  | 146  | 16.5  | 9.45  | 42   |       |       |       |       |       |       |
| Q3UMY5  | <i>Eml4</i>    | Echinoderm       | High   | 5  | 5  | 5   | 5  | 988  | 110   | 6.54  | 40   | 94.4  | 96.3  | 97.6  | 104.3 | 104.4 | 103   |
| Q61194  | <i>Pik3c2a</i> | Phosphatidylinos | High   | 3  | 4  | 4   | 4  | 1686 | 190.6 | 8.02  | 35   | 101.7 | 99.6  | 103.1 | 96.9  | 95.6  | 103.1 |
| Q9JJ59  | <i>Abcb9</i>   | ATP-binding      | High   | 9  | 5  | 5   | 3  | 762  | 83.9  | 7.62  | 68   | 97    | 96.1  | 92.4  | 106.8 | 109.6 | 98.1  |

|        |                  |                   |        |    |    |     |    |      |       |       |      |       |       |       |       |       |       |
|--------|------------------|-------------------|--------|----|----|-----|----|------|-------|-------|------|-------|-------|-------|-------|-------|-------|
| P14211 | <i>Calr</i>      | Calreticulin      | High   | 60 | 21 | 42  | 21 | 416  | 48    | 4.49  | 411  | 105.1 | 100.8 | 114.4 | 91.5  | 93.1  | 95    |
| Q80SY6 | <i>Adal</i>      | Adenosine         | Medium | 3  | 1  | 2   | 1  | 360  | 41    | 6.35  | 17   | 90.8  | 120   | 90.5  | 99.4  | 109.1 | 90.2  |
| Q8BHL8 | <i>Psmf1</i>     | Proteasome        | High   | 17 | 3  | 5   | 3  | 271  | 29.6  | 5.25  | 89   | 96.8  | 98.2  | 95.4  | 104   | 103   | 102.7 |
| Q5XPI3 | <i>Rnf123</i>    | E3 ubiquitin-     | High   | 1  | 2  | 2   | 2  | 1314 | 148.6 | 6.7   | 27   | 100.1 | 101.8 | 96.1  | 94.3  | 102.6 | 105.2 |
| Q5BLK4 | <i>Tut7</i>      | Terminal          | Medium | 1  | 1  | 1   | 1  | 1491 | 169   | 6.65  | 17   | 85.3  | 135.6 | 121.3 | 86.2  | 86.1  | 85.5  |
| Q91YN0 | <i>D6Wsu163e</i> | Protein C12orf4   | Medium | 3  | 1  | 1   | 1  | 552  | 63.6  | 6.18  | 16   | 82.6  | 105.4 | 126.5 | 107.4 | 86.4  | 91.8  |
| Q80TZ9 | <i>Rere</i>      | Arginine-         | Medium | 1  | 1  | 1   | 1  | 1558 | 171.6 | 7.69  | 0    |       |       |       |       |       |       |
| Q4JIM5 | <i>Abl2</i>      | Tyrosine-protein  | High   | 3  | 2  | 2   | 2  | 1182 | 128.1 | 7.84  | 38   | 93.1  | 103.4 | 86.2  | 99.7  | 102.2 | 115.5 |
| Q9WTP7 | <i>Ak3</i>       | GTP:AMP           | High   | 59 | 13 | 28  | 13 | 227  | 25.4  | 8.84  | 597  | 98.3  | 100.6 | 100.5 | 97.7  | 100.9 | 101.9 |
| Q8QZT2 | <i>Ccsap</i>     | Centriole, cilia  | High   | 34 | 6  | 6   | 6  | 252  | 28.4  | 9.22  | 58   | 97.6  | 107.4 | 88.9  | 99.4  | 103   | 103.6 |
| Q9CQ49 | <i>Ncbp2</i>     | Nuclear cap-      | High   | 10 | 2  | 2   | 2  | 156  | 18    | 7.81  | 30   | 102   | 104.3 | 103.9 | 99.1  | 95.4  | 95.2  |
| P46978 | <i>Stt3a</i>     | Dolichyl-         | High   | 9  | 6  | 6   | 6  | 705  | 80.5  | 8.1   | 68   | 106.7 | 102.1 | 112.2 | 95.7  | 93.6  | 89.7  |
| P02301 | <i>H3-5</i>      | Histone H3.3C     | High   | 26 | 5  | 13  | 1  | 136  | 15.3  | 11.14 | 131  | 101.3 | 105.1 | 116.3 | 92    | 100   | 85.3  |
| Q9DCX2 | <i>Atp5pd</i>    | ATP synthase      | High   | 81 | 12 | 46  | 12 | 161  | 18.7  | 5.69  | 518  | 96.4  | 106.3 | 88.9  | 102.1 | 104.8 | 101.4 |
| Q9Z2U0 | <i>Pasma7</i>    | Proteasome        | High   | 58 | 12 | 20  | 12 | 248  | 27.8  | 8.46  | 418  | 99    | 98.8  | 100.3 | 99.8  | 100.6 | 101.5 |
| Q9Z266 | <i>Snapin</i>    | SNARE-            | High   | 23 | 3  | 5   | 3  | 136  | 14.9  | 9.31  | 80   | 99.7  | 97.4  | 101.7 | 103.6 | 99.6  | 98    |
| Q61074 | <i>Ppm1g</i>     | Protein           | High   | 17 | 8  | 10  | 8  | 542  | 58.7  | 4.39  | 196  | 100.9 | 100.6 | 95.7  | 100.2 | 102.9 | 99.5  |
| Q9WUR2 | <i>Eci2</i>      | Enoyl-CoA delta   | High   | 19 | 6  | 9   | 6  | 391  | 43.2  | 8.92  | 210  | 98.7  | 101.6 | 104.5 | 97.7  | 98.7  | 98.8  |
| Q78JE5 | <i>Fbxo22</i>    | F-box only        | High   | 15 | 6  | 6   | 6  | 402  | 44.2  | 7.61  | 30   | 99.3  | 108   | 87.3  | 107.8 | 102.9 | 94.6  |
| Q9JHG2 | <i>Rcan2</i>     | Calcipressin-2    | High   | 6  | 1  | 1   | 1  | 197  | 22    | 6.68  | 0    |       |       |       |       |       |       |
| P97384 | <i>Anxa11</i>    | Annexin A11       | High   | 27 | 12 | 17  | 11 | 503  | 54    | 7.66  | 285  | 100.7 | 103.8 | 105.3 | 97.5  | 95.9  | 96.7  |
| Q8VD65 | <i>Pik3r4</i>    | Phosphoinositide  | High   | 11 | 12 | 17  | 12 | 1358 | 152.5 | 7.12  | 262  | 98.8  | 104.2 | 101   | 97.9  | 96    | 102.2 |
| Q9JKY0 | <i>Cnot9</i>     | CCR4-NOT          | High   | 15 | 4  | 4   | 4  | 299  | 33.6  | 8.03  | 76   | 97    | 102.6 | 98.4  | 103.2 | 96.2  | 102.6 |
| P35486 | <i>Pdha1</i>     | Pyruvate          | High   | 58 | 22 | 60  | 22 | 390  | 43.2  | 8.19  | 786  | 96.9  | 103.6 | 91.8  | 102.2 | 101.9 | 103.6 |
| P97821 | <i>Ctsc</i>      | Dipeptidyl        | High   | 11 | 3  | 4   | 3  | 462  | 52.3  | 6.89  | 58   | 116.2 | 96.7  | 162.8 | 69.3  | 75.7  | 79.4  |
| Q9JIM1 | <i>Slc29a1</i>   | Equilibrative     | Medium | 3  | 1  | 1   | 1  | 460  | 50.2  | 8.31  | 28   | 100.2 | 98.9  | 97.3  | 106.7 | 102.1 | 94.8  |
| Q6PD31 | <i>Trak1</i>     | Trafficking       | High   | 2  | 1  | 1   | 1  | 939  | 104.4 | 5.78  | 0    |       |       |       |       |       |       |
| Q01730 | <i>Rsu1</i>      | Ras suppressor    | High   | 16 | 4  | 6   | 4  | 277  | 31.5  | 8.88  | 122  | 108.1 | 103.9 | 107   | 87.3  | 93.2  | 100.4 |
| Q9JIW9 | <i>Ralb</i>      | Ras-related       | High   | 49 | 8  | 12  | 3  | 206  | 23.3  | 6.62  | 329  | 101.6 | 105   | 101.7 | 94.2  | 97.7  | 100   |
| P28741 | <i>Kif3a</i>     | Kinesin-like      | High   | 13 | 8  | 12  | 8  | 701  | 80.1  | 6.54  | 119  | 100.7 | 98.8  | 96.1  | 102   | 102.9 | 99.5  |
| Q9JME9 | <i>Vstm2b</i>    | V-set and         | High   | 5  | 1  | 1   | 1  | 285  | 30.1  | 7.15  | 19   | 97.3  | 90.7  | 86.4  | 117.4 | 104.4 | 103.8 |
| P97300 | <i>Nptn</i>      | Neuroplastin      | High   | 28 | 11 | 25  | 11 | 397  | 44.3  | 7.74  | 324  | 94.3  | 102.6 | 85.8  | 110.8 | 103.5 | 102.9 |
| Q61390 | <i>Cct6b</i>     | T-complex         | High   | 11 | 5  | 9   | 1  | 531  | 58.1  | 7.36  | 160  | 86.1  | 110.3 | 97    | 97.7  | 95.8  | 113.1 |
| Q6ZQ93 | <i>Usp34</i>     | Ubiquitin         | Low    | 0  | 1  | 1   | 1  | 3582 | 408   | 5.68  | 0    | 95.5  | 99.9  | 93.7  | 90.6  | 114.7 | 105.6 |
| P68254 | <i>Ywhaq</i>     | 14-3-3 protein    | High   | 63 | 15 | 91  | 10 | 245  | 27.8  | 4.78  | 1656 | 99.6  | 99.6  | 100.9 | 102.5 | 96.9  | 100.5 |
| P58137 | <i>Acot8</i>     | Acyl-coenzyme     | High   | 17 | 4  | 4   | 4  | 320  | 35.8  | 7.64  | 53   | 102.6 | 100.4 | 101.8 | 100.3 | 99.3  | 95.6  |
| Q99LC8 | <i>Eif2b1</i>    | Translation       | High   | 21 | 5  | 5   | 5  | 305  | 33.8  | 8.32  | 135  | 101   | 98.5  | 99.4  | 97.8  | 100.6 | 102.7 |
| P08228 | <i>Sod1</i>      | Superoxide        | High   | 55 | 9  | 31  | 9  | 154  | 15.9  | 6.51  | 653  | 99.1  | 99.2  | 96.9  | 101   | 105.2 | 98.7  |
| Q8BU88 | <i>Mrpl22</i>    | 39S ribosomal     | High   | 8  | 1  | 1   | 1  | 206  | 23.8  | 9.86  | 28   | 107.8 | 92.7  | 97.9  | 100.9 | 106.8 | 93.9  |
| Q60610 | <i>Tiam1</i>     | T-lymphoma        | High   | 4  | 4  | 5   | 4  | 1591 | 177.4 | 6.67  | 82   | 95.2  | 94.8  | 99.5  | 108.4 | 105.6 | 96.5  |
| Q9QYS9 | <i>Qki</i>       | Protein quaking   | High   | 16 | 4  | 6   | 4  | 341  | 37.6  | 8.56  | 83   | 99.4  | 103.4 | 103.5 | 99.2  | 93.4  | 101   |
| Q9CYI4 | <i>Luc7l</i>     | Putative RNA-     | High   | 9  | 3  | 4   | 1  | 371  | 43.9  | 9.88  | 78   | 96.7  | 100.8 | 93.9  | 98.4  | 97.3  | 112.9 |
| P62071 | <i>Rras2</i>     | Ras-related       | High   | 34 | 7  | 12  | 5  | 204  | 23.4  | 6.01  | 275  | 85.9  | 91.8  | 84.7  | 112   | 114.6 | 110.9 |
| Q9DCM2 | <i>Gstk1</i>     | Glutathione S-    | High   | 26 | 5  | 5   | 5  | 226  | 25.7  | 8.88  | 90   | 103.2 | 107   | 106.4 | 96.6  | 93.8  | 93    |
| Q3ULD5 | <i>Mccc2</i>     | Methylcrotonoyl-  | High   | 27 | 12 | 15  | 12 | 563  | 61.3  | 8     | 217  | 96.5  | 101.9 | 96.6  | 98.7  | 102   | 104.2 |
| Q9D8N0 | <i>Eef1g</i>     | Elongation factor | High   | 47 | 19 | 29  | 19 | 437  | 50    | 6.74  | 322  | 102.6 | 101.6 | 101.1 | 99.2  | 98.4  | 97    |
| Q8BVP5 | <i>Csnk1g2</i>   | Casein kinase I   | High   | 17 | 6  | 7   | 1  | 415  | 47.6  | 9.06  | 69   | 102.1 | 119.3 | 75.2  | 77.5  | 109.2 | 116.6 |
| Q3TVI8 | <i>Pbxip1</i>    | Pre-B-cell        | High   | 4  | 2  | 2   | 2  | 727  | 81.1  | 5.36  | 41   | 112.5 | 88    | 138.2 | 88.6  | 79.8  | 93    |
| Q8C561 | <i>Lmbrd2</i>    | G-protein         | High   | 3  | 2  | 2   | 2  | 694  | 81    | 7.34  | 17   |       |       |       |       |       |       |
| Q78PG9 | <i>Ccdc25</i>    | Coiled-coil       | High   | 12 | 2  | 2   | 2  | 208  | 24.5  | 6.95  | 47   |       |       |       |       |       |       |
| Q8BPN8 | <i>Dmxl2</i>     | DmX-like protein  | High   | 31 | 76 | 112 | 72 | 3032 | 338   | 6.42  | 2125 | 95.9  | 98.2  | 93.3  | 105.4 | 104.5 | 102.7 |
| Q9D753 | <i>Exosc8</i>    | Exosome           | Low    | 3  | 1  | 1   | 1  | 276  | 29.9  | 5.2   | 16   |       |       |       |       |       |       |
| Q60737 | <i>Csnk2a1</i>   | Casein kinase II  | High   | 40 | 14 | 25  | 13 | 391  | 45.1  | 7.74  | 388  | 96.6  | 102.2 | 96.1  | 101.9 | 102.5 | 100.8 |
| Q8R0S4 | <i>Cacnb4</i>    | Voltage-          | High   | 27 | 12 | 17  | 8  | 519  | 57.9  | 9.28  | 288  | 98.3  | 103.8 | 95.1  | 101.5 | 97.8  | 103.4 |
| Q61792 | <i>Lasp1</i>     | LIM and SH3       | High   | 41 | 11 | 17  | 10 | 263  | 30    | 7.05  | 331  | 91.3  | 96.3  | 90.5  | 110.6 | 106.8 | 104.5 |
| Q9D2P4 | <i>Urm1</i>      | Ubiquitin-related | High   | 15 | 1  | 2   | 1  | 101  | 11.3  | 4.74  | 40   | 96.6  | 87.4  | 98.1  | 102.1 | 102.2 | 113.6 |
| O70400 | <i>Pdlim1</i>    | PDZ and LIM       | High   | 20 | 4  | 4   | 4  | 327  | 35.8  | 6.84  | 17   | 111.5 | 86.9  | 128.9 | 90.7  | 89.6  | 92.2  |
| Q80TV8 | <i>Clasp1</i>    | CLIP-associating  | High   | 19 | 25 | 33  | 19 | 1535 | 169.1 | 9.03  | 357  | 100.5 | 98.5  | 98.8  | 99.8  | 102.1 | 100.4 |
| Q3UN02 | <i>Lclat1</i>    | Lysocardiolipin   | High   | 10 | 3  | 4   | 3  | 376  | 44.4  | 8.53  | 27   | 97.4  | 97.9  | 99.3  | 103.1 | 99.1  | 103.3 |
| Q9D0G0 | <i>Mrps30</i>    | 28S ribosomal     | High   | 13 | 5  | 5   | 5  | 442  | 49.9  | 9.38  | 86   | 87.9  | 94    | 91.5  | 107.5 | 107.2 | 112   |
| O88983 | <i>Stx8</i>      | Syntaxin-8        | High   | 11 | 2  | 3   | 2  | 236  | 26.9  | 5.01  | 125  | 94.4  | 100   | 95.2  | 99.4  | 108.1 | 102.8 |
| Q8R3P0 | <i>Aspa</i>      | Aspartoacylase    | High   | 27 | 7  | 8   | 7  | 312  | 35.3  | 6.58  | 113  | 97.3  | 110.1 | 97.3  | 96.7  | 98.3  | 100.2 |
| Q9QYY0 | <i>Gab1</i>      | GRB2-             | High   | 2  | 1  | 2   | 1  | 695  | 76.8  | 5.67  | 23   | 99.9  | 106.4 | 103.7 | 91.1  | 98.5  | 100.3 |
| Q9CX00 | <i>Ist1</i>      | IST1 homolog      | High   | 27 | 8  | 9   | 8  | 362  | 39.4  | 5.44  | 201  | 97.9  | 99.3  | 95.9  | 99    | 105.8 | 102.2 |
| Q6W8Q3 | <i>Pcp4l1</i>    | Purkinje cell     | High   | 32 | 2  | 3   | 2  | 68   | 7.5   | 5.52  | 63   | 90.5  | 98.4  | 101.2 | 100.4 | 105.5 | 104   |
| Q8BGS2 | <i>Bola2</i>     | BolA-like protein | High   | 41 | 3  | 4   | 3  | 86   | 10.2  | 6.16  | 125  | 98.2  | 102.1 | 99.9  | 103.1 | 98.1  | 98.7  |
| Q00560 | <i>Il6st</i>     | Interleukin-6     | High   | 1  | 1  | 1   | 1  | 917  | 102.4 | 5.52  | 0    |       |       |       |       |       |       |
| P63254 | <i>Crip1</i>     | Cysteine-rich     | High   | 25 | 2  | 2   | 2  | 77   | 8.5   | 8.57  | 21   | 102.5 | 107.4 | 134.9 | 73.7  | 86.7  | 94.7  |

|        |                 |                   |        |    |    |     |    |      |       |      |      |       |       |       |       |       |       |
|--------|-----------------|-------------------|--------|----|----|-----|----|------|-------|------|------|-------|-------|-------|-------|-------|-------|
| Q8K0Z7 | <i>Taco1</i>    | Translational     | High   | 9  | 2  | 3   | 2  | 294  | 32.3  | 8.12 | 80   | 93.3  | 104.6 | 98.7  | 104.2 | 100.6 | 98.6  |
| Q09014 | <i>Ncf1</i>     | Neutrophil        | High   | 5  | 2  | 2   | 2  | 390  | 44.6  | 9.01 | 32   | 124.2 | 96.7  | 148.7 | 69.7  | 81.1  | 79.6  |
| O55070 | <i>Dnase1b3</i> | Deoxyribonuclea   | Low    | 5  | 1  | 1   | 1  | 310  | 35.7  | 8.66 | 0    | 103.9 | 110.1 | 79.5  | 93.8  | 94.8  | 118   |
| Q9DBD0 | <i>Ica</i>      | Inhibitor of      | High   | 7  | 5  | 6   | 4  | 700  | 76.7  | 7.25 | 77   | 138.3 | 80    | 183.1 | 62.8  | 66.9  | 68.8  |
| Q08943 | <i>Ssrp1</i>    | FACT complex      | High   | 13 | 7  | 11  | 7  | 708  | 80.8  | 6.76 | 126  | 105.1 | 103   | 111.6 | 92    | 95.1  | 93.1  |
| P70196 | <i>Traf6</i>    | TNF receptor-     | High   | 2  | 1  | 1   | 1  | 530  | 60    | 6.55 | 38   | 93.8  | 103.1 | 92.1  | 102.2 | 103.8 | 105   |
| Q0KL01 | <i>Ubxn2b</i>   | UBX domain-       | High   | 29 | 6  | 7   | 6  | 331  | 37.4  | 5.94 | 146  | 97.5  | 100.5 | 99.5  | 105.2 | 96.6  | 100.8 |
| Q9CQI7 | <i>Snrpb2</i>   | U2 small nuclear  | High   | 16 | 3  | 4   | 2  | 225  | 25.3  | 9.72 | 84   | 98.4  | 94.4  | 89    | 102.5 | 111.6 | 104.2 |
| Q9WVK8 | <i>Cyp46a1</i>  | Cholesterol 24-   | High   | 30 | 14 | 20  | 14 | 500  | 56.8  | 8.82 | 371  | 99.1  | 98.8  | 100   | 103.3 | 99.2  | 99.7  |
| Q9CQ80 | <i>Vps25</i>    | Vacuolar protein- | High   | 38 | 5  | 6   | 5  | 176  | 20.7  | 6.34 | 97   | 99.6  | 98.3  | 101.2 | 100.5 | 99.5  | 101   |
| Q60829 | <i>Ppp1r1b</i>  | Protein           | High   | 50 | 6  | 15  | 6  | 194  | 21.8  | 4.65 | 181  | 86.3  | 99.7  | 87.8  | 98.7  | 114.4 | 113.1 |
| Q06890 | <i>Clu</i>      | Clusterin         | High   | 33 | 12 | 25  | 12 | 448  | 51.6  | 5.67 | 499  | 138.5 | 95    | 142.1 | 70.9  | 76.7  | 76.8  |
| Q99JT1 | <i>Gatb</i>     | Glutamyl-         | High   | 10 | 3  | 4   | 3  | 557  | 62.1  | 8.54 | 42   | 102.7 | 91.1  | 94.4  | 103.3 | 100.9 | 107.7 |
| Q99N28 | <i>Cadm3</i>    | Cell adhesion     | High   | 29 | 8  | 17  | 8  | 396  | 42.9  | 5.8  | 149  | 99    | 101.4 | 92    | 106.1 | 103.9 | 97.7  |
| Q9WUB0 | <i>Rbck1</i>    | RanBP-type and    | Medium | 2  | 1  | 1   | 1  | 508  | 57.5  | 6.19 | 15   |       |       |       |       |       |       |
| Q7TME0 | <i>Plppr4</i>   | 2-                | High   | 16 | 11 | 13  | 11 | 766  | 83.2  | 8.84 | 247  | 98.7  | 92.7  | 100.6 | 101.4 | 105.8 | 100.7 |
| Q9QZB0 | <i>Rgs17</i>    | Regulator of G-   | High   | 38 | 5  | 6   | 5  | 210  | 24.3  | 5.71 | 100  | 93.1  | 96.5  | 96.2  | 104.2 | 107.5 | 102.5 |
| O08585 | <i>Clta</i>     | Clathrin light    | High   | 26 | 8  | 15  | 7  | 235  | 25.6  | 4.58 | 186  | 98.1  | 105.4 | 93.6  | 104.6 | 100   | 98.3  |
| Q9CQE3 | <i>Mrps17</i>   | 28S ribosomal     | High   | 43 | 3  | 3   | 3  | 120  | 13.4  | 9.89 | 52   | 93.9  | 98.5  | 91.2  | 100.5 | 95    | 120.9 |
| Q8BTY2 | <i>Slc4a7</i>   | Sodium            | High   | 4  | 3  | 4   | 1  | 1034 | 116.4 | 6.24 | 133  | 93.3  | 105.8 | 84.6  | 95.5  | 112.1 | 108.6 |
| Q8C5V8 | <i>Ccdc187</i>  | Coiled-coil       | Low    | 1  | 1  | 1   | 1  | 958  | 104.9 | 9.8  | 0    |       |       |       |       |       |       |
| P55772 | <i>Entpd1</i>   | Ectonucleoside    | Medium | 2  | 1  | 1   | 1  | 510  | 57.2  | 5.86 | 15   | 100.8 | 103.1 | 111.5 | 103.9 | 83.9  | 96.8  |
| Q8K4Z5 | <i>Sf3a1</i>    | Splicing factor   | High   | 17 | 12 | 14  | 12 | 791  | 88.5  | 5.22 | 147  | 103.7 | 99.6  | 99.4  | 98.9  | 99.5  | 98.9  |
| Q61771 | <i>Kif3b</i>    | Kinesin-like      | High   | 14 | 11 | 14  | 8  | 747  | 85.2  | 7.69 | 173  | 98.3  | 100.3 | 94.9  | 105.4 | 98.6  | 102.4 |
| Q8VHL1 | <i>Setd7</i>    | Histone-lysine N- | High   | 22 | 6  | 8   | 6  | 366  | 40.5  | 4.65 | 156  | 94.2  | 104.5 | 87.6  | 102.4 | 105.1 | 106.2 |
| Q8K4K6 | <i>Pank1</i>    | Pantothenate      | High   | 3  | 2  | 2   | 2  | 548  | 60.1  | 8.03 | 21   | 94.2  | 127.4 | 93.8  | 99.1  | 95.8  | 89.7  |
| Q08331 | <i>Calb2</i>    | Calretinin        | High   | 45 | 11 | 14  | 10 | 271  | 31.4  | 5.02 | 287  | 91.8  | 72.3  | 91.6  | 104.4 | 120.9 | 119   |
| Q9ER88 | <i>Dap3</i>     | 28S ribosomal     | High   | 14 | 5  | 6   | 5  | 391  | 44.7  | 8.94 | 110  | 95.1  | 100.8 | 91.7  | 103.3 | 106.7 | 102.4 |
| Q9ERB0 | <i>Snap29</i>   | Synaptosomal-     | High   | 26 | 6  | 7   | 6  | 260  | 29.6  | 5.38 | 163  | 93.6  | 98.3  | 101.1 | 103.7 | 97.8  | 105.6 |
| P97427 | <i>Crmp1</i>    | Dihydropyrimidin  | High   | 74 | 30 | 106 | 26 | 572  | 62.1  | 7.12 | 2248 | 90.2  | 90.7  | 85.6  | 112.6 | 113.1 | 107.7 |
| Q3UDE2 | <i>Tll12</i>    | Tubulin--tyrosine | High   | 16 | 7  | 8   | 7  | 639  | 74    | 5.63 | 70   | 97    | 93.4  | 98.4  | 104.1 | 100.6 | 106.5 |
| B1AXP6 | <i>Tomm5</i>    | Mitochondrial     | High   | 29 | 2  | 2   | 2  | 51   | 6     | 9.6  | 27   | 90.7  | 108   | 90.6  | 116.4 | 95.9  | 98.4  |
| P51642 | <i>Cntf</i>     | Ciliary           | High   | 6  | 1  | 1   | 1  | 198  | 22.6  | 6.52 | 32   | 116.6 | 95.2  | 183.4 | 62.6  | 62.7  | 79.4  |
| Q61210 | <i>Arhgef1</i>  | Rho guanine       | High   | 7  | 5  | 5   | 5  | 920  | 102.7 | 5.6  | 82   | 100.3 | 104.5 | 107.9 | 95.3  | 93    | 99.1  |
| Q8ROX7 | <i>Sgpl1</i>    | Sphingosine-1-    | High   | 4  | 2  | 3   | 2  | 568  | 63.6  | 9.1  | 56   | 120.6 | 110   | 130.5 | 79.4  | 80.8  | 78.7  |
| Q3TL44 | <i>Nlr1</i>     | NLR family        | High   | 1  | 1  | 2   | 1  | 975  | 107.8 | 7.37 | 86   | 89.2  | 102.3 | 98.8  | 111.6 | 105.7 | 92.5  |
| Q9EQ20 | <i>Aldh6a1</i>  | Methylmalonate-   | High   | 47 | 19 | 29  | 19 | 535  | 57.9  | 8.07 | 625  | 101   | 96.9  | 96.2  | 100.7 | 101.3 | 103.9 |
| P50580 | <i>Pa2g4</i>    | Proliferation-    | High   | 44 | 15 | 22  | 15 | 394  | 43.7  | 6.86 | 331  | 99.3  | 99.7  | 101.6 | 100.1 | 99.1  | 100.1 |
| Q91YH5 | <i>Atf3</i>     | Atlastin-3        | High   | 6  | 3  | 5   | 2  | 541  | 60.5  | 6.1  | 80   | 99.1  | 102   | 104.3 | 100.4 | 96.1  | 98.1  |
| Q8K3C3 | <i>Lzic</i>     | Protein LZIC      | High   | 34 | 5  | 6   | 5  | 190  | 21.5  | 4.96 | 117  | 93.9  | 104.1 | 95.8  | 99.6  | 100.6 | 106   |
| Q9JI11 | <i>Stk4</i>     | Serine/threonine  | High   | 11 | 4  | 4   | 1  | 487  | 55.5  | 5.19 | 75   | 113.1 | 94.7  | 132.6 | 81.7  | 93.5  | 84.3  |
| Q3URQ0 | <i>Tex10</i>    | Testis-expressed  | Medium | 1  | 1  | 1   | 1  | 928  | 105.1 | 9.16 | 23   |       |       |       |       |       |       |
| Q3UCQ1 | <i>Foxk2</i>    | Forkhead box      | Medium | 1  | 1  | 1   | 1  | 651  | 68.4  | 9.51 | 19   |       |       |       |       |       |       |
| Q8K2P1 | <i>Lurap1l</i>  | Leucine rich      | High   | 6  | 1  | 1   | 1  | 221  | 23.7  | 5.11 | 24   |       |       |       |       |       |       |
| Q9CXE7 | <i>Tmed5</i>    | Transmembrane     | High   | 10 | 2  | 3   | 2  | 229  | 26.2  | 4.93 | 81   | 114.8 | 100.9 | 124.3 | 87.4  | 86.8  | 85.7  |
| Q78PY7 | <i>Snd1</i>     | Staphylococcal    | High   | 37 | 26 | 37  | 26 | 910  | 102   | 7.43 | 734  | 101.8 | 99.3  | 104.6 | 96.5  | 98.1  | 99.7  |
| P17751 | <i>Tpi1</i>     | Triosephosphate   | High   | 87 | 16 | 67  | 16 | 249  | 26.7  | 7.3  | 1405 | 100.5 | 103   | 96.5  | 100.6 | 100.9 | 98.6  |
| Q80ZI6 | <i>Lrsam1</i>   | E3 ubiquitin-     | High   | 8  | 4  | 4   | 4  | 727  | 83.9  | 6.14 | 65   | 89.6  | 94.3  | 86.2  | 92.5  | 97.7  | 139.8 |
| Q08376 | <i>Zbtb14</i>   | Zinc finger and   | Medium | 4  | 1  | 1   | 1  | 449  | 50.9  | 6.04 | 0    |       |       |       |       |       |       |
| Q80YE7 | <i>Dapk1</i>    | Death-            | High   | 3  | 4  | 4   | 4  | 1442 | 161.3 | 6.89 | 49   | 103.3 | 101.8 | 103   | 89.6  | 102.1 | 100.1 |
| Q60866 | <i>Pter</i>     | Phosphotriestera  | High   | 3  | 1  | 1   | 1  | 349  | 39.2  | 6.67 | 42   |       |       |       |       |       |       |
| P31786 | <i>Dbi</i>      | Acyl-CoA-         | High   | 54 | 4  | 13  | 4  | 87   | 10    | 8.82 | 379  | 104   | 109.5 | 114.8 | 83.9  | 96.5  | 91.3  |
| Q6PAJ1 | <i>Bcr</i>      | Breakpoint        | High   | 21 | 21 | 26  | 19 | 1270 | 143   | 6.92 | 328  | 101.6 | 95.8  | 104.5 | 94.7  | 101.6 | 101.8 |
| P51660 | <i>Hsd17b4</i>  | Peroxisomal       | High   | 19 | 12 | 18  | 12 | 735  | 79.4  | 8.57 | 318  | 106.4 | 101.5 | 118.8 | 87.9  | 95.1  | 90.4  |
| D3Z7Q2 | <i>Smim20</i>   | Small integral    | High   | 20 | 1  | 1   | 1  | 69   | 7.8   | 9.7  | 45   |       |       |       |       |       |       |
| P61620 | <i>Sec61a1</i>  | Protein transport | High   | 6  | 3  | 3   | 3  | 476  | 52.2  | 8.06 | 82   | 109.2 | 103.6 | 113.9 | 92.5  | 87.4  | 93.5  |
| Q8BHG9 | <i>Cggbp1</i>   | CGG triplet       | High   | 5  | 1  | 1   | 1  | 167  | 18.8  | 8.95 | 33   | 97.4  | 99.2  | 107.3 | 99.6  | 96.3  | 100.2 |
| Q80TR1 | <i>Adgrl1</i>   | Adhesion G        | High   | 10 | 11 | 12  | 11 | 1466 | 161.6 | 6.48 | 112  | 93.7  | 98    | 91.3  | 105.9 | 105.7 | 105.3 |
| P11404 | <i>Fabp3</i>    | Fatty acid-       | High   | 37 | 5  | 9   | 5  | 133  | 14.8  | 6.57 | 126  | 95.2  | 95.9  | 84.9  | 106.2 | 111   | 106.7 |
| Q80X80 | <i>C2cd2l</i>   | Phospholipid      | High   | 18 | 8  | 11  | 8  | 706  | 76.3  | 7.21 | 73   | 91.3  | 94.7  | 92.1  | 106.5 | 108.8 | 106.6 |
| P13597 | <i>Icam1</i>    | Intercellular     | High   | 4  | 2  | 2   | 2  | 537  | 58.8  | 6.13 | 20   | 116.7 | 101.1 | 147.6 | 80.6  | 75.6  | 78.3  |
| P05555 | <i>Ilgam</i>    | Integrin alpha-M  | High   | 5  | 6  | 6   | 6  | 1153 | 127.4 | 7.27 | 63   | 127.9 | 108   | 155.4 | 62.8  | 71.6  | 74.3  |
| E9Q6B2 | <i>Ccdc85c</i>  | Coiled-coil       | High   | 5  | 2  | 2   | 2  | 420  | 45.3  | 6.96 | 0    |       |       |       |       |       |       |
| Q8BYR5 | <i>Cadps2</i>   | Calcium-          | High   | 17 | 20 | 35  | 13 | 1297 | 147.7 | 6.14 | 586  | 91.7  | 101.5 | 82.4  | 106.6 | 102.3 | 115.4 |
| Q93092 | <i>Taldo1</i>   | Transaldolase     | High   | 37 | 14 | 22  | 14 | 337  | 37.4  | 7.03 | 383  | 106.6 | 103.7 | 113.4 | 91.1  | 91.9  | 93.3  |
| Q9R233 | <i>Tapbp</i>    | Tapasin           | Medium | 2  | 1  | 1   | 1  | 465  | 49.7  | 8.5  | 22   | 107.2 | 129.8 | 156.5 | 66.9  | 68.4  | 71.2  |
| Q9D8E6 | <i>Rpl4</i>     | 60S ribosomal     | High   | 40 | 17 | 30  | 17 | 419  | 47.1  | 11   | 502  | 105.1 | 100.1 | 105.1 | 96.8  | 97.9  | 95    |
| Q60629 | <i>Epha5</i>    | Ephrin type-A     | High   | 8  | 5  | 5   | 4  | 876  | 97    | 6.64 | 26   | 105.8 | 101.9 | 121.3 | 89    | 88.6  | 93.5  |

|        |                 |                   |        |    |    |     |    |      |       |       |      |       |       |       |       |       |       |
|--------|-----------------|-------------------|--------|----|----|-----|----|------|-------|-------|------|-------|-------|-------|-------|-------|-------|
| Q91WK5 | <i>Gcsh</i>     | Glycine cleavage  | High   | 18 | 2  | 4   | 2  | 170  | 18.6  | 4.75  | 94   | 97.6  | 95.7  | 105.1 | 96.3  | 99.4  | 105.9 |
| Q8CDG3 | <i>Vcpip1</i>   | Deubiquitinating  | High   | 19 | 18 | 21  | 18 | 1220 | 134.4 | 7.17  | 251  | 95.7  | 100   | 90.2  | 107.4 | 101.3 | 105.3 |
| Q80XN0 | <i>Bdh1</i>     | D-beta-           | High   | 31 | 10 | 27  | 10 | 343  | 38.3  | 9.01  | 447  | 87.1  | 94    | 82.8  | 113.3 | 108.6 | 114.2 |
| Q9Z268 | <i>Rasal1</i>   | RasGAP-           | High   | 28 | 20 | 28  | 20 | 799  | 89.3  | 6.37  | 431  | 96.9  | 94.7  | 99.6  | 100.2 | 104.1 | 104.4 |
| Q60771 | <i>Cldn11</i>   | Claudin-11        | High   | 15 | 4  | 11  | 4  | 207  | 22.1  | 7.91  | 119  | 102.3 | 127.1 | 105.4 | 90    | 89.8  | 85.5  |
| O88587 | <i>Comt</i>     | Catechol O-       | High   | 20 | 4  | 6   | 4  | 265  | 29.5  | 5.83  | 115  | 99.4  | 100.7 | 100   | 101.3 | 102.8 | 95.8  |
| Q6NZB0 | <i>Dnajc8</i>   | DnaJ homolog      | High   | 20 | 4  | 4   | 4  | 253  | 29.8  | 9.06  | 82   | 102.4 | 102.8 | 96    | 97.5  | 103.2 | 98.3  |
| P35822 | <i>Ptprk</i>    | Receptor-type     | Medium | 1  | 1  | 1   | 1  | 1457 | 164.1 | 5.95  | 0    | 102.2 | 87.9  | 94.5  | 105   | 105.3 | 105.2 |
| Q8VEE4 | <i>Rpa1</i>     | Replication       | High   | 6  | 3  | 4   | 3  | 623  | 69    | 7.91  | 42   | 97.7  | 102.4 | 107.2 | 91.1  | 101.8 | 99.8  |
| Q8R238 | <i>Sdsl</i>     | Serine            | Medium | 2  | 1  | 1   | 1  | 329  | 34.7  | 6.43  | 27   | 96.9  | 116.2 | 107.2 | 96.5  | 92.9  | 90.5  |
| Q91ZT5 | <i>Fgd4</i>     | FYVE, RhoGEF      | High   | 3  | 2  | 2   | 2  | 766  | 86.5  | 5.95  | 35   | 97.9  | 97.4  | 97.1  | 99.2  | 108.3 | 100.1 |
| Q9D8W5 | <i>Psmd12</i>   | 26S proteasome    | High   | 32 | 12 | 17  | 12 | 456  | 52.9  | 7.06  | 343  | 97    | 100.3 | 99.9  | 99.5  | 100.9 | 102.4 |
| P98086 | <i>C1qa</i>     | Complement        | High   | 27 | 6  | 7   | 6  | 245  | 26    | 9.11  | 138  | 139.1 | 128.5 | 139.7 | 61    | 64.5  | 67.1  |
| Q03147 | <i>Cdk7</i>     | Cyclin-           | High   | 11 | 3  | 3   | 3  | 346  | 38.9  | 8.47  | 82   | 95.9  | 96.4  | 100   | 100.5 | 105.1 | 102   |
| Q7TQD2 | <i>Tppp</i>     | Tubulin           | High   | 52 | 11 | 37  | 11 | 218  | 23.6  | 9.42  | 1060 | 95.1  | 101.7 | 94.5  | 103.6 | 102   | 103.1 |
| P56959 | <i>Fus</i>      | RNA-binding       | High   | 15 | 8  | 13  | 8  | 518  | 52.6  | 9.36  | 158  | 98.2  | 94.2  | 100.6 | 104.8 | 104.3 | 98    |
| Q9QZ23 | <i>Nfu1</i>     | NFU1 iron-sulfur  | High   | 19 | 4  | 5   | 4  | 255  | 28.5  | 5.03  | 48   | 95.8  | 100.3 | 89.8  | 99.3  | 103.9 | 110.9 |
| Q64524 | <i>H2bc21</i>   | Histone H2B       | High   | 48 | 7  | 51  | 3  | 126  | 14    | 10.32 | 835  | 104.8 | 86.5  | 100.4 | 105.2 | 107.8 | 95.2  |
| Q8BIL5 | <i>Hook1</i>    | Protein Hook      | High   | 7  | 4  | 5   | 4  | 728  | 84.4  | 5.22  | 61   | 92.9  | 94.3  | 98    | 97.9  | 113.5 | 103.3 |
| O88738 | <i>Birc6</i>    | Baculoviral IAP   | High   | 3  | 10 | 12  | 10 | 4882 | 531.8 | 6.07  | 206  | 100.5 | 96.2  | 94.9  | 105.8 | 98.6  | 103.9 |
| P10649 | <i>Gstm1</i>    | Glutathione S-    | High   | 70 | 16 | 43  | 12 | 218  | 26    | 7.94  | 759  | 99.5  | 102.6 | 98.2  | 98.6  | 101.3 | 99.9  |
| P42227 | <i>Stat3</i>    | Signal            | High   | 4  | 2  | 3   | 2  | 770  | 88    | 6.3   | 107  | 110.6 | 110.1 | 125.6 | 83.4  | 85.6  | 84.7  |
| P63011 | <i>Rab3a</i>    | Ras-related       | High   | 53 | 9  | 66  | 5  | 220  | 25    | 5.03  | 1566 | 95.9  | 94.7  | 89.8  | 107.3 | 108.5 | 103.7 |
| P61514 | <i>Rpl37a</i>   | 60S ribosomal     | High   | 10 | 2  | 2   | 2  | 92   | 10.3  | 10.43 | 25   | 111.4 | 102.4 | 111   | 95.3  | 93.3  | 86.7  |
| Q9D415 | <i>Dlgap1</i>   | Disks large-      | High   | 16 | 14 | 17  | 14 | 992  | 110.3 | 7.09  | 333  | 94.5  | 97.4  | 91.8  | 104.9 | 106.4 | 105   |
| P63030 | <i>Mpc1</i>     | Mitochondrial     | High   | 15 | 2  | 5   | 2  | 109  | 12.4  | 9.61  | 43   | 94.1  | 99.1  | 90.5  | 109.2 | 103.6 | 103.5 |
| Q63844 | <i>Mapk3</i>    | Mitogen-          | High   | 33 | 11 | 24  | 7  | 380  | 43    | 6.61  | 485  | 108.7 | 102.8 | 109.8 | 89.1  | 95    | 94.6  |
| Q8BHG1 | <i>Nrdc</i>     | Nardilysin        | High   | 16 | 17 | 21  | 17 | 1161 | 132.8 | 4.87  | 240  | 100.7 | 100.3 | 101.4 | 97.7  | 96.5  | 103.4 |
| O89020 | <i>Afm</i>      | Afamin OS=Mus     | High   | 2  | 1  | 1   | 1  | 608  | 69.3  | 5.78  | 26   |       |       |       |       |       |       |
| P70188 | <i>Kifap3</i>   | Kinesin-          | High   | 10 | 7  | 7   | 7  | 793  | 91.2  | 5.11  | 65   | 95.3  | 98.6  | 92.1  | 105.5 | 99.1  | 109.5 |
| P54830 | <i>Ptpn5</i>    | Tyrosine-protein  | High   | 16 | 6  | 6   | 6  | 541  | 60.8  | 5.2   | 56   | 94.1  | 81.5  | 96.2  | 99.9  | 104.8 | 123.5 |
| Q61120 | <i>Shc3</i>     | SHC-              | High   | 2  | 1  | 1   | 1  | 474  | 52.1  | 7.3   | 19   | 92.2  | 101.7 | 87.8  | 98.5  | 106   | 113.8 |
| Q0GA42 | <i>Cnnm1</i>    | Metal transporter | High   | 6  | 5  | 7   | 4  | 951  | 103.9 | 6.51  | 162  | 95    | 100.3 | 89.2  | 105.2 | 104.6 | 105.8 |
| Q62101 | <i>Prkd1</i>    | Serine/threonine  | Low    | 2  | 1  | 1   | 1  | 918  | 102   | 6.58  | 0    | 105.3 | 95.3  | 107.4 | 91.6  | 103.3 | 97    |
| Q68FD5 | <i>Cltc</i>     | Clathrin heavy    | High   | 56 | 83 | 344 | 83 | 1675 | 191.4 | 5.69  | 7044 | 98    | 102.6 | 91.1  | 104.4 | 103.2 | 100.7 |
| Q9WV32 | <i>Arpc1b</i>   | Actin-related     | High   | 18 | 6  | 7   | 6  | 372  | 41    | 8.35  | 102  | 115   | 107.6 | 143.3 | 74.5  | 78.8  | 80.9  |
| Q9CR41 | <i>Hypk</i>     | Huntingtin-       | High   | 36 | 3  | 3   | 3  | 129  | 14.7  | 4.93  | 110  | 96.9  | 101.6 | 93.9  | 97.2  | 103.7 | 106.6 |
| P62075 | <i>Timm13</i>   | Mitochondrial     | High   | 78 | 6  | 13  | 6  | 95   | 10.5  | 8.18  | 333  | 115.7 | 103.4 | 110.1 | 93.7  | 87.8  | 89.2  |
| O70311 | <i>Nmt2</i>     | Glycylpeptide N-  | High   | 20 | 9  | 10  | 5  | 529  | 60.4  | 7.8   | 159  | 96.8  | 98.8  | 94.1  | 109.6 | 100.4 | 100.3 |
| Q8CFP6 | <i>Dnajc27</i>  | DnaJ homolog      | Medium | 5  | 1  | 1   | 1  | 273  | 30.8  | 8.47  | 22   | 91.9  | 108.4 | 91.3  | 109   | 102.9 | 96.6  |
| Q9Z0H3 | <i>Smarca1</i>  | SWI/SNF-related   | High   | 7  | 2  | 2   | 2  | 385  | 44.1  | 6.23  | 33   | 99.1  | 95.2  | 95.6  | 107.9 | 99.8  | 102.3 |
| Q9JLV5 | <i>Cul3</i>     | Cullin-3 OS=Mus   | High   | 34 | 23 | 30  | 22 | 768  | 88.9  | 8.46  | 483  | 98    | 100.5 | 96.7  | 101.2 | 102   | 101.5 |
| Q9CZG3 | <i>Commdb</i>   | COMM domain-      | Low    | 4  | 1  | 1   | 1  | 183  | 20.8  | 5.59  | 0    |       |       |       |       |       |       |
| Q5DU25 | <i>Iqsec2</i>   | IQ motif and      | High   | 21 | 27 | 33  | 21 | 1478 | 161.7 | 8.56  | 481  | 94.7  | 97.7  | 92.8  | 104.4 | 103.8 | 106.7 |
| P49442 | <i>Inpp1</i>    | Inositol          | High   | 38 | 13 | 21  | 13 | 396  | 43.3  | 5.01  | 547  | 94.5  | 95.6  | 92.2  | 103.9 | 108.9 | 104.8 |
| Q8JZQ2 | <i>Afg3l2</i>   | AFG3-like         | High   | 35 | 23 | 33  | 20 | 802  | 89.5  | 8.6   | 609  | 98.2  | 101.1 | 92.4  | 104   | 101.6 | 102.7 |
| Q9D289 | <i>Trappc6b</i> | Trafficking       | High   | 33 | 5  | 6   | 5  | 158  | 17.9  | 8.68  | 94   | 95.9  | 100.9 | 95.8  | 105   | 100.2 | 102.2 |
| Q9ES00 | <i>Ube4b</i>    | Ubiquitin         | High   | 9  | 8  | 9   | 8  | 1173 | 133.2 | 6.07  | 121  | 98.4  | 96.3  | 100.6 | 103   | 99.6  | 102.1 |
| Q8BL80 | <i>Arhgap22</i> | Rho GTPase-       | Medium | 2  | 1  | 1   | 1  | 702  | 77.7  | 7.88  | 0    | 99.3  | 94.2  | 96.9  | 88.6  | 99.8  | 121.1 |
| P27005 | <i>S100a8</i>   | Protein S100-A8   | High   | 30 | 2  | 7   | 2  | 89   | 10.3  | 5.68  | 160  | 100.8 | 74.9  | 272.3 | 45.5  | 53    | 53.4  |
| O88653 | <i>Lamtor3</i>  | Ragulator         | High   | 31 | 2  | 2   | 2  | 124  | 13.5  | 7.34  | 80   | 105.5 | 106.1 | 98.9  | 98.7  | 99    | 91.7  |
| Q61789 | <i>Lama3</i>    | Laminin subunit   | Medium | 0  | 1  | 1   | 1  | 3330 | 366   | 6.65  | 16   |       |       |       |       |       |       |
| Q9CQ25 | <i>Mzt2</i>     | Mitotic-spindle   | High   | 16 | 1  | 2   | 1  | 159  | 16.5  | 10.18 | 122  | 79.4  | 82.9  | 99.2  | 93    | 117.9 | 127.6 |
| Q8BJ71 | <i>Nup93</i>    | Nuclear pore      | High   | 14 | 10 | 10  | 10 | 819  | 93.2  | 5.72  | 99   | 104.1 | 98.6  | 108.3 | 98.8  | 94    | 96.3  |
| P02798 | <i>Mt2</i>      | Metallothionein-2 | Medium | 33 | 1  | 1   | 1  | 61   | 6.1   | 7.83  | 19   | 106.7 | 71.2  | 170.1 | 81.8  | 77.5  | 92.6  |
| Q9D1B9 | <i>Mrpl28</i>   | 39S ribosomal     | High   | 8  | 2  | 2   | 2  | 257  | 30.2  | 9.29  | 25   | 89.7  | 96.6  | 92.4  | 98.6  | 107.8 | 115   |
| Q9JIA7 | <i>Sphk2</i>    | Sphingosine       | High   | 5  | 2  | 2   | 2  | 617  | 65.6  | 6.57  | 36   | 95.3  | 96.9  | 98.7  | 105.7 | 102.2 | 101.2 |
| Q9R111 | <i>Gda</i>      | Guanine           | High   | 61 | 25 | 55  | 25 | 454  | 51    | 5.53  | 1265 | 94.5  | 94.2  | 87.3  | 106.9 | 109.1 | 107.9 |
| O08545 | <i>Efna3</i>    | Ephrin-A3         | High   | 7  | 1  | 1   | 1  | 230  | 25.6  | 8.44  | 28   |       |       |       |       |       |       |
| Q7TQG1 | <i>Plekha6</i>  | Pleckstrin        | High   | 5  | 5  | 5   | 5  | 1173 | 131.3 | 8.97  | 59   | 95.3  | 97.7  | 97.3  | 107.6 | 98    | 104.1 |
| Q8BH60 | <i>Gopc</i>     | Golgi-associated  | High   | 8  | 4  | 4   | 4  | 463  | 50.6  | 6.25  | 19   | 100   | 92.7  | 97.6  | 98.4  | 100.3 | 111   |
| Q61316 | <i>Hspa4</i>    | Heat shock 70     | High   | 62 | 44 | 82  | 41 | 841  | 94.1  | 5.24  | 1759 | 96.8  | 98.8  | 96.7  | 101.3 | 103   | 103.5 |
| Q99PV0 | <i>Prpf8</i>    | Pre-mRNA-         | High   | 18 | 37 | 43  | 37 | 2335 | 273.4 | 8.84  | 460  | 100.2 | 97.8  | 100   | 100.6 | 100.3 | 101   |
| O35633 | <i>Slc32a1</i>  | Vesicular         | High   | 23 | 9  | 14  | 9  | 525  | 57.3  | 6.64  | 173  | 97.4  | 96.4  | 93.9  | 104.4 | 107.5 | 100.4 |
| P61079 | <i>Ube2d3</i>   | Ubiquitin-        | High   | 29 | 3  | 4   | 3  | 147  | 16.7  | 7.8   | 156  | 95.9  | 99.2  | 95.5  | 105.1 | 101.4 | 102.8 |
| Q61271 | <i>Acvr1b</i>   | Activin receptor  | Medium | 2  | 1  | 1   | 1  | 505  | 56.7  | 7.17  | 18   | 84.5  | 109.2 | 79.8  | 104.2 | 108.6 | 113.7 |
| Q80TF3 | <i>Pcdh19</i>   | Protocadherin-    | High   | 1  | 1  | 1   | 1  | 1145 | 126   | 5.5   | 53   | 112.1 | 89.4  | 92.5  | 91.3  | 101   | 113.7 |
| P70392 | <i>Rasgrf2</i>  | Ras-specific      | High   | 13 | 15 | 19  | 13 | 1189 | 135.6 | 7.85  | 322  | 100.9 | 103.9 | 94.3  | 100.6 | 98.1  | 102.3 |



|        |                 |                    |        |    |    |     |    |      |       |      |      |       |       |       |       |       |       |
|--------|-----------------|--------------------|--------|----|----|-----|----|------|-------|------|------|-------|-------|-------|-------|-------|-------|
| Q5SSH7 | <i>Zzef1</i>    | Zinc finger ZZ-    | High   | 3  | 6  | 7   | 6  | 2924 | 328.1 | 6.11 | 98   | 101.2 | 102.7 | 101.6 | 97.4  | 97    | 100.1 |
| P61082 | <i>Ube2m</i>    | NEDD8-             | High   | 37 | 6  | 10  | 6  | 183  | 20.9  | 7.69 | 129  | 99.5  | 100.3 | 97.4  | 102.8 | 100.2 | 99.8  |
| Q9ET80 | <i>Jph1</i>     | Junctophilin-1     | High   | 3  | 2  | 2   | 2  | 660  | 71.9  | 9.22 | 24   | 98.8  | 91.8  | 100.7 | 103.6 | 99.1  | 105.9 |
| Q5DQR4 | <i>Stxbp5l</i>  | Syntaxin-binding   | High   | 22 | 20 | 22  | 19 | 1185 | 131.8 | 6.86 | 259  | 96.8  | 101.4 | 91.4  | 102.4 | 102.7 | 105.3 |
| P46638 | <i>Rab11b</i>   | Ras-related        | High   | 61 | 13 | 29  | 13 | 218  | 24.5  | 5.94 | 544  | 101.6 | 100.2 | 93.8  | 103   | 101.5 | 100   |
| Q9CR16 | <i>Ppid</i>     | Peptidyl-prolyl    | High   | 44 | 17 | 29  | 17 | 370  | 40.7  | 7.43 | 497  | 100   | 102.1 | 102.7 | 97.9  | 99.1  | 98.3  |
| Q9EQ06 | <i>Hsd17b11</i> | Estradiol 17-      | High   | 23 | 6  | 8   | 6  | 298  | 32.9  | 8.66 | 146  | 107.4 | 103.9 | 115   | 90.3  | 93.6  | 89.8  |
| Q99M04 | <i>Lias</i>     | Lipoyl synthase,   | High   | 6  | 1  | 1   | 1  | 373  | 41.9  | 8.88 | 15   | 91.8  | 104.9 | 99.1  | 96.4  | 99.2  | 108.7 |
| Q8BKF1 | <i>Polrmt</i>   | DNA-directed       | Low    | 1  | 1  | 1   | 1  | 1207 | 136.6 | 9.09 | 0    | 92.7  | 89.9  | 73.1  | 117.6 | 114.6 | 112.1 |
| Q80VD1 | <i>Fam98b</i>   | Protein FAM98B     | High   | 31 | 9  | 12  | 8  | 429  | 45.3  | 8.5  | 280  | 100.8 | 99.3  | 103.9 | 100.4 | 98.4  | 97.2  |
| P47753 | <i>Capza1</i>   | F-actin-capping    | High   | 50 | 10 | 17  | 8  | 286  | 32.9  | 5.55 | 265  | 98.2  | 96.2  | 115.1 | 95.4  | 94    | 101.2 |
| Q9QZB1 | <i>Rgs20</i>    | Regulator of G-    | High   | 9  | 2  | 4   | 2  | 239  | 27    | 5.16 | 100  | 94.4  | 104.7 | 92.9  | 103.8 | 102.1 | 102   |
| Q9Z2N8 | <i>Actl6a</i>   | Actin-like protein | High   | 8  | 3  | 4   | 2  | 429  | 47.4  | 5.6  | 47   |       |       |       |       |       |       |
| P52760 | <i>Rida</i>     | 2-                 | High   | 64 | 7  | 14  | 7  | 135  | 14.2  | 8.68 | 289  | 113.4 | 105   | 116.9 | 85.9  | 91.5  | 87.4  |
| Q8VC42 | <i>Rmc1</i>     | Regulator of       | High   | 6  | 2  | 3   | 2  | 657  | 74.9  | 7.83 | 98   | 92.8  | 102   | 96    | 100.6 | 104.1 | 104.5 |
| P23591 | <i>Gfus</i>     | GDP-L-fucose       | High   | 17 | 4  | 4   | 4  | 321  | 35.9  | 6.74 | 110  | 101.5 | 95.9  | 99.9  | 100.2 | 99.6  | 102.9 |
| P97369 | <i>Ncf4</i>     | Neutrophil         | High   | 3  | 1  | 1   | 1  | 339  | 38.7  | 6.21 | 23   |       |       |       |       |       |       |
| Q9CZ69 | <i>Cmtm6</i>    | CKLF-like          | High   | 5  | 1  | 1   | 1  | 183  | 19.8  | 6.29 | 39   | 98.2  | 98.7  | 97.6  | 96    | 102.1 | 107.4 |
| Q9Z0S1 | <i>Bpnt1</i>    | 3'(2'),5'-         | High   | 53 | 12 | 17  | 12 | 308  | 33.2  | 5.82 | 349  | 96    | 104.9 | 93.7  | 103.1 | 101.4 | 100.9 |
| P42337 | <i>Pik3ca</i>   | Phosphatidylinos   | High   | 2  | 2  | 3   | 2  | 1068 | 124.3 | 7.15 | 42   | 97.6  | 102   | 88.2  | 100.8 | 106.2 | 105.1 |
| Q9D938 | <i>Tmem160</i>  | Transmembrane      | Medium | 11 | 2  | 2   | 2  | 188  | 19.6  | 7.3  | 0    | 93.5  | 100.3 | 91.5  | 104.7 | 101.9 | 108.1 |
| O08600 | <i>Endog</i>    | Endonuclease       | High   | 7  | 2  | 2   | 2  | 294  | 32.2  | 9.54 | 21   | 97.1  | 98    | 102.2 | 103.2 | 96.9  | 102.7 |
| P47962 | <i>Rpl5</i>     | 60S ribosomal      | High   | 25 | 8  | 13  | 8  | 297  | 34.4  | 9.77 | 140  | 104.8 | 99.7  | 107.2 | 97.6  | 98.4  | 92.5  |
| Q80VJ2 | <i>Sra1</i>     | Steroid receptor   | Medium | 13 | 2  | 2   | 2  | 232  | 25.5  | 6.43 | 0    | 91.8  | 104.9 | 93.7  | 99.5  | 110.5 | 99.6  |
| Q3UH66 | <i>Wnk2</i>     | Serine/threonine   | High   | 7  | 12 | 16  | 8  | 2149 | 227.4 | 5.91 | 179  | 96.4  | 99.4  | 90.4  | 108.2 | 102.3 | 103.3 |
| O88737 | <i>Bsn</i>      | Protein bassoon    | High   | 32 | 88 | 131 | 86 | 3942 | 418.6 | 7.71 | 2090 | 93.9  | 97.6  | 87.6  | 110.2 | 107.1 | 103.6 |
| O35382 | <i>Exoc4</i>    | Exocyst complex    | High   | 18 | 15 | 20  | 15 | 975  | 110.5 | 6.49 | 321  | 96    | 94.8  | 95    | 112.3 | 98.9  | 103   |
| Q8BHL3 | <i>Tbc1d10b</i> | TBC1 domain        | High   | 17 | 9  | 13  | 9  | 798  | 87.2  | 8.9  | 230  | 94.2  | 95    | 93.2  | 107.8 | 104.4 | 105.4 |
| Q8C0M9 | <i>Asrgl1</i>   | Isoaspartyl        | High   | 54 | 14 | 27  | 14 | 326  | 33.9  | 7.65 | 573  | 99.7  | 102.9 | 100.1 | 103.1 | 95.1  | 99.2  |
| Q9CXT8 | <i>Pmpcb</i>    | Mitochondrial-     | High   | 13 | 5  | 8   | 5  | 489  | 54.6  | 6.99 | 171  | 99.5  | 103   | 94.9  | 99.3  | 102.7 | 100.7 |
| P21126 | <i>Ubl4a</i>    | Ubiquitin-like     | High   | 32 | 4  | 5   | 4  | 157  | 17.8  | 8.44 | 99   | 101   | 96.6  | 99.5  | 103.4 | 96.8  | 102.7 |
| Q01768 | <i>Nme2</i>     | Nucleoside         | High   | 78 | 11 | 28  | 6  | 152  | 17.4  | 7.5  | 271  | 106.7 | 105.1 | 109   | 94.1  | 89.5  | 95.5  |
| Q8BHJ5 | <i>Tbl1xr1</i>  | F-box-like/WD      | High   | 14 | 5  | 5   | 3  | 514  | 55.6  | 5.63 | 93   | 94.3  | 100.8 | 98.7  | 96.6  | 97.8  | 111.7 |
| O54692 | <i>Zw10</i>     | Centromere/kine    | High   | 8  | 4  | 4   | 4  | 779  | 88    | 5.92 | 97   | 84.3  | 97.9  | 109.3 | 105.9 | 114.1 | 88.5  |
| Q80UM7 | <i>Mogs</i>     | Mannosyl-          | High   | 11 | 7  | 8   | 7  | 834  | 91.8  | 9    | 117  | 100.7 | 98.7  | 101.7 | 95.8  | 100.2 | 102.9 |
| Q8R146 | <i>Apeh</i>     | Acylamino-acid-    | High   | 7  | 5  | 8   | 5  | 732  | 81.5  | 5.59 | 148  | 104.5 | 98.5  | 109   | 94.2  | 99.7  | 94.1  |
| P97371 | <i>Psme1</i>    | Proteasome         | High   | 31 | 9  | 12  | 9  | 249  | 28.7  | 5.97 | 214  | 115   | 109.9 | 140.1 | 80    | 78.5  | 76.5  |
| P35802 | <i>Gpm6a</i>    | Neuronal           | High   | 29 | 10 | 27  | 10 | 278  | 31.1  | 5.27 | 328  | 89.3  | 93.9  | 89    | 117.8 | 104.1 | 105.8 |
| Q9CQF9 | <i>Pcyox1</i>   | Prenylcysteine     | High   | 32 | 10 | 12  | 10 | 505  | 56.5  | 6.92 | 242  | 101.3 | 102   | 105   | 99.1  | 97.1  | 95.6  |
| P63073 | <i>Eif4e</i>    | Eukaryotic         | High   | 20 | 4  | 5   | 4  | 217  | 25    | 6.15 | 90   | 102   | 101.3 | 97.8  | 97.1  | 100.2 | 101.5 |
| P83870 | <i>Phf5a</i>    | PHD finger-like    | High   | 28 | 3  | 3   | 3  | 110  | 12.4  | 8.41 | 58   | 93.8  | 100.2 | 101.7 | 101.7 | 98.4  | 104.3 |
| Q99P72 | <i>Rtn4</i>     | Reticulon-4        | High   | 48 | 33 | 76  | 33 | 1162 | 126.5 | 4.54 | 1159 | 99.5  | 100.3 | 101   | 100   | 99.8  | 99.4  |
| Q9CRB9 | <i>Chchd3</i>   | MICOS complex      | High   | 35 | 10 | 15  | 10 | 227  | 26.3  | 8.37 | 257  | 98.8  | 105.4 | 92.8  | 101.6 | 102.3 | 99.1  |
| Q9WV98 | <i>Timm9</i>    | Mitochondrial      | High   | 60 | 5  | 8   | 5  | 89   | 10.3  | 7.21 | 142  | 97.4  | 102.7 | 94.5  | 105.1 | 100.2 | 100.2 |
| Q8CI43 | <i>Myl6b</i>    | Myosin light       | High   | 10 | 2  | 3   | 1  | 207  | 22.7  | 5.53 | 65   | 100.2 | 103.3 | 98.3  | 98.1  | 98.1  | 102   |
| P26040 | <i>Ezr</i>      | Ezrin OS=Mus       | High   | 40 | 23 | 42  | 14 | 586  | 69.4  | 6.1  | 776  | 111.8 | 107.8 | 124.8 | 86.4  | 84    | 85.1  |
| Q9ERR1 | <i>Ndel1</i>    | Nuclear            | High   | 23 | 7  | 9   | 7  | 345  | 38.3  | 5.24 | 153  | 91.7  | 100.9 | 95.9  | 104.4 | 101.4 | 105.6 |
| Q3USZ8 | <i>Dipk2a</i>   | Divergent protein  | High   | 3  | 1  | 1   | 1  | 430  | 49.4  | 8.63 | 33   | 102.8 | 103.7 | 106.3 | 85.2  | 104.3 | 97.7  |
| Q9WU79 | <i>Prodh</i>    | Proline            | High   | 16 | 7  | 9   | 7  | 599  | 68    | 8.24 | 121  | 91.2  | 98.7  | 86.6  | 109.2 | 110.5 | 103.9 |
| Q3TCJ1 | <i>Abraxas2</i> | BRISC complex      | High   | 8  | 3  | 3   | 3  | 415  | 46.9  | 6.18 | 19   | 96.9  | 96.4  | 96.8  | 102.6 | 104.1 | 103.3 |
| Q8JZQ9 | <i>Eif3b</i>    | Eukaryotic         | High   | 15 | 11 | 17  | 11 | 803  | 91.3  | 5.02 | 277  | 101.1 | 102.3 | 102.3 | 96.8  | 98.6  | 98.8  |
| P12658 | <i>Calb1</i>    | Calbindin          | High   | 56 | 13 | 29  | 12 | 261  | 30    | 4.83 | 482  | 92.7  | 100.3 | 84    | 108.6 | 105.1 | 109.3 |
| Q6P2B1 | <i>Tnpo3</i>    | Transportin-3      | High   | 15 | 10 | 10  | 10 | 923  | 104.1 | 5.57 | 123  | 103.1 | 96.6  | 100.2 | 100.1 | 100.8 | 99.1  |
| P09581 | <i>Csf1r</i>    | Macrophage         | Low    | 3  | 1  | 1   | 1  | 977  | 109.1 | 6.21 | 0    | 83.5  | 84.1  | 94.6  | 116.4 | 125.5 | 95.9  |
| P39447 | <i>Tjp1</i>     | Tight junction     | High   | 14 | 19 | 23  | 19 | 1745 | 194.6 | 6.64 | 319  | 105.4 | 104   | 108.8 | 95.3  | 93.1  | 93.4  |
| Q60634 | <i>Flot2</i>    | Flotillin-2        | High   | 44 | 18 | 32  | 18 | 428  | 47    | 5.2  | 595  | 97.6  | 96.2  | 98.1  | 99.6  | 103   | 105.4 |
| Q3U214 | <i>Mast3</i>    | Microtubule-       | High   | 9  | 9  | 9   | 8  | 1321 | 144.1 | 8.44 | 67   | 96.3  | 98.2  | 95    | 106.4 | 103.3 | 100.8 |
| Q9CZJ2 | <i>Hspa12b</i>  | Heat shock 70      | High   | 7  | 5  | 6   | 3  | 685  | 76.1  | 8.47 | 101  | 100.7 | 105.5 | 92.8  | 109.3 | 91.4  | 100.2 |
| Q3UTQ8 | <i>Cdkl5</i>    | Cyclin-            | High   | 15 | 13 | 15  | 12 | 938  | 105.4 | 9.58 | 221  | 98.3  | 101   | 90.7  | 104   | 103.5 | 102.5 |
| Q9WVA4 | <i>Tagln2</i>   | Transgelin-2       | High   | 56 | 8  | 12  | 7  | 199  | 22.4  | 8.24 | 231  | 118.7 | 107.6 | 137   | 78.2  | 76.1  | 82.4  |
| Q9R1P0 | <i>Psma4</i>    | Proteasome         | High   | 43 | 9  | 17  | 9  | 261  | 29.5  | 7.72 | 365  | 100.1 | 94    | 106.9 | 101.6 | 98.7  | 98.6  |
| Q3TWI9 | <i>Tmem63b</i>  | CSC1-like          | High   | 1  | 1  | 1   | 1  | 832  | 94.7  | 7.49 | 35   | 95.6  | 101.6 | 96.5  | 102.3 | 102.2 | 101.8 |
| Q9JKC6 | <i>Cend1</i>    | Cell cycle exit    | High   | 36 | 6  | 21  | 6  | 149  | 15    | 8.97 | 301  | 90.5  | 102.1 | 83.6  | 106.7 | 106.8 | 110.3 |
| Q9D180 | <i>Cfap57</i>   | Cilia- and         | Low    | 1  | 1  | 1   | 1  | 1249 | 144.8 | 5.74 | 0    |       |       |       |       |       |       |
| Q8VHW2 | <i>Cacng8</i>   | Voltage-           | High   | 24 | 6  | 7   | 6  | 423  | 43.4  | 9.2  | 109  | 92.1  | 96.3  | 116   | 100.3 | 94.6  | 100.6 |
| O09131 | <i>Gsto1</i>    | Glutathione S-     | High   | 23 | 6  | 7   | 6  | 240  | 27.5  | 7.36 | 69   | 94.9  | 97.2  | 91.9  | 100.7 | 110.1 | 105.3 |
| Q8CJG1 | <i>Ago1</i>     | Protein            | High   | 10 | 6  | 6   | 2  | 857  | 97.2  | 9.16 | 65   | 92    | 94.7  | 89.1  | 105.7 | 106.3 | 112.2 |
| Q99J27 | <i>Slc33a1</i>  | Acetyl-coenzyme    | High   | 2  | 1  | 1   | 1  | 550  | 61    | 8.16 | 43   | 96.7  | 95.5  | 107.4 | 95.6  | 103.3 | 101.6 |

|        |                 |                   |        |    |    |     |    |      |       |      |      |       |       |       |       |       |       |
|--------|-----------------|-------------------|--------|----|----|-----|----|------|-------|------|------|-------|-------|-------|-------|-------|-------|
| O88851 | <i>Rbbp9</i>    | Putative          | High   | 18 | 2  | 2   | 2  | 186  | 20.9  | 5.97 | 28   | 97.2  | 101.1 | 94.3  | 102.3 | 92.7  | 112.6 |
| O09044 | <i>Snap23</i>   | Synaptosomal-     | High   | 23 | 4  | 11  | 3  | 210  | 23.2  | 4.98 | 158  | 108.5 | 97.8  | 119.6 | 86.6  | 97.4  | 90.1  |
| Q78J03 | <i>Msrb2</i>    | Methionine-R-     | High   | 31 | 5  | 5   | 5  | 175  | 19.1  | 9.06 | 48   | 99.7  | 105.6 | 100.6 | 98    | 96.9  | 99.2  |
| O08599 | <i>Stxbp1</i>   | Syntaxin-binding  | High   | 67 | 36 | 193 | 35 | 594  | 67.5  | 6.96 | 3338 | 96.9  | 101.2 | 88    | 105.3 | 105.1 | 103.4 |
| O08807 | <i>Prdx4</i>    | Peroxiredoxin-4   | High   | 25 | 6  | 12  | 4  | 274  | 31    | 7.15 | 179  | 101.4 | 112.5 | 104.9 | 93.5  | 98.5  | 89.1  |
| P70425 | <i>Rit2</i>     | GTP-binding       | High   | 6  | 1  | 1   | 1  | 217  | 24.8  | 6.92 | 29   | 94.2  | 95.7  | 93.5  | 97.4  | 105   | 114.2 |
| Q9D1M0 | <i>Sec13</i>    | Protein SEC13     | High   | 23 | 5  | 12  | 5  | 322  | 35.5  | 5.38 | 176  | 97.5  | 102.2 | 101.8 | 103.1 | 97.5  | 97.9  |
| O88848 | <i>Arl6</i>     | ADP-ribosylation  | High   | 34 | 5  | 6   | 5  | 186  | 20.9  | 8.25 | 79   | 93.1  | 93.9  | 99.1  | 105.2 | 103.9 | 104.7 |
| Q60960 | <i>Kpna1</i>    | Importin subunit  | High   | 12 | 6  | 6   | 3  | 538  | 60.1  | 5.01 | 92   | 96.3  | 101.6 | 94.9  | 101.7 | 108.5 | 97.1  |
| Q921D4 | <i>Med6</i>     | Mediator of RNA   | Medium | 4  | 1  | 1   | 1  | 246  | 28.4  | 8.62 | 25   | 98.5  | 92.8  | 114.5 | 88.2  | 102.9 | 103.1 |
| P59481 | <i>Lman2l</i>   | VIP36-like        | High   | 10 | 3  | 3   | 3  | 347  | 39.9  | 9.41 | 37   | 100.4 | 100.2 | 104.2 | 98.5  | 91.3  | 105.3 |
| P60824 | <i>Cirbp</i>    | Cold-inducible    | High   | 33 | 4  | 5   | 4  | 172  | 18.6  | 9.61 | 59   | 115.9 | 83.6  | 79.7  | 105.9 | 109.3 | 105.5 |
| Q66JZ4 | <i>TCAIM</i>    | T-cell activation | Low    | 2  | 1  | 1   | 1  | 499  | 57.4  | 9.25 | 0    |       |       |       |       |       |       |
| Q9JIZ0 | <i>Cml1</i>     | Probable N-       | Medium | 3  | 1  | 1   | 1  | 222  | 25    | 9.55 | 30   | 99.6  | 102.9 | 96.3  | 95.3  | 101.2 | 104.8 |
| Q569Z5 | <i>Ddx46</i>    | Probable ATP-     | High   | 6  | 7  | 7   | 7  | 1032 | 117.4 | 9.26 | 83   | 103.9 | 97.7  | 120.4 | 87.1  | 90.8  | 100.1 |
| P98078 | <i>Dab2</i>     | Disabled          | High   | 3  | 2  | 2   | 2  | 766  | 82.3  | 6.1  | 67   | 113.6 | 98.9  | 115.7 | 81.3  | 93.5  | 97    |
| Q9DCG9 | <i>Trmt112</i>  | Multifunctional   | High   | 43 | 4  | 4   | 4  | 125  | 14.1  | 5.27 | 70   | 97.9  | 100.1 | 91.4  | 103.7 | 110   | 97    |
| Q925N0 | <i>Sfxn5</i>    | Sideroflexin-5    | High   | 30 | 7  | 19  | 7  | 342  | 37.3  | 9.44 | 394  | 97.4  | 97.4  | 100.9 | 97.4  | 104.6 | 102.3 |
| Q8K157 | <i>Galm</i>     | Galactose         | High   | 5  | 1  | 1   | 1  | 342  | 37.8  | 6.74 | 43   | 93.9  | 105.1 | 111.3 | 71.3  | 115   | 103.4 |
| Q9Z1T2 | <i>Thbs4</i>    | Thrombospondin    | High   | 2  | 1  | 1   | 1  | 963  | 106.3 | 4.67 | 31   | 88.4  | 128.5 | 133.8 | 75.6  | 87.6  | 86.1  |
| P35278 | <i>Rab5c</i>    | Ras-related       | High   | 82 | 11 | 28  | 8  | 216  | 23.4  | 8.41 | 701  | 101   | 101.1 | 100.5 | 96.6  | 99.7  | 101   |
| P47934 | <i>Crat</i>     | Carnitine O-      | High   | 16 | 9  | 10  | 9  | 626  | 70.8  | 8.44 | 150  | 109.5 | 94.8  | 120.9 | 88.1  | 93.9  | 92.8  |
| Q9D032 | <i>Ssbp3</i>    | Single-stranded   | High   | 3  | 1  | 1   | 1  | 388  | 40.4  | 6.9  | 34   |       |       |       |       |       |       |
| Q8C8N2 | <i>Scai</i>     | Protein SCAI      | High   | 23 | 14 | 17  | 14 | 606  | 70.2  | 8.6  | 154  | 97.7  | 95.8  | 93.1  | 103.8 | 105.2 | 104.4 |
| P26048 | <i>Gabra2</i>   | Gamma-            | High   | 11 | 5  | 8   | 3  | 451  | 51.1  | 9.06 | 196  | 95.2  | 95.8  | 100.4 | 102.5 | 106.4 | 99.6  |
| P23927 | <i>Cryab</i>    | Alpha-crystallin  | High   | 36 | 6  | 8   | 6  | 175  | 20.1  | 7.33 | 70   | 102   | 121.7 | 100   | 95.3  | 91.6  | 89.3  |
| Q9CR62 | <i>Slc25a11</i> | Mitochondrial 2-  | High   | 43 | 12 | 26  | 12 | 314  | 34.1  | 9.94 | 601  | 97.9  | 104.8 | 93    | 103.1 | 101.4 | 99.8  |
| P11247 | <i>Mpo</i>      | Myeloperoxidase   | High   | 6  | 3  | 3   | 3  | 718  | 81.1  | 9.55 | 27   | 119.7 | 82.1  | 156.6 | 81.1  | 79.8  | 80.7  |
| Q6P542 | <i>Abcf1</i>    | ATP-binding       | High   | 12 | 7  | 8   | 7  | 837  | 94.9  | 6.51 | 185  | 94.6  | 99.2  | 104.5 | 102.6 | 98.5  | 100.7 |
| Q922Q4 | <i>Pycr2</i>    | Pyrraline-5-      | High   | 37 | 9  | 12  | 9  | 320  | 33.6  | 7.77 | 227  | 94.2  | 97.9  | 94.8  | 104.2 | 101.6 | 107.3 |
| Q01279 | <i>Egfr</i>     | Epidermal         | High   | 3  | 3  | 4   | 2  | 1210 | 134.8 | 6.86 | 99   | 155.2 | 74.3  | 167.2 | 65.6  | 67.9  | 69.8  |
| P28660 | <i>Nckap1</i>   | Nck-associated    | High   | 37 | 37 | 75  | 35 | 1128 | 128.7 | 6.62 | 1288 | 94.7  | 98.9  | 94    | 105   | 102.1 | 105.3 |
| Q8R5H6 | <i>Wasf1</i>    | Wiskott-Aldrich   | High   | 30 | 15 | 27  | 13 | 559  | 61.5  | 6.37 | 417  | 93.5  | 100.6 | 90.5  | 105.4 | 100.8 | 109.3 |
| P60122 | <i>Ruvbl1</i>   | RuvB-like 1       | High   | 34 | 13 | 17  | 13 | 456  | 50.2  | 6.42 | 343  | 99    | 99.4  | 101.6 | 101.2 | 98.3  | 100.6 |
| O54946 | <i>Dnajb6</i>   | DnaJ homolog      | High   | 11 | 4  | 7   | 3  | 365  | 39.8  | 9.36 | 216  | 103.6 | 103   | 97.8  | 105.3 | 96.6  | 93.7  |
| Q99JT9 | <i>Adi1</i>     | 1,2-dihydroxy-3-  | High   | 14 | 2  | 2   | 2  | 179  | 21.5  | 5.5  | 44   | 102.9 | 100   | 89.3  | 109.6 | 105.1 | 93.1  |
| Q7M6Y3 | <i>Picalm</i>   | Phosphatidylinos  | High   | 23 | 11 | 16  | 9  | 660  | 71.5  | 7.91 | 193  | 99.1  | 100.3 | 101   | 101.7 | 96.6  | 101.3 |
| Q6NZL0 | <i>Soga3</i>    | Protein SOGA3     | High   | 20 | 20 | 25  | 15 | 945  | 103.4 | 6.14 | 369  | 96.3  | 100.4 | 90.2  | 108.4 | 101.8 | 102.9 |
| Q6PHS9 | <i>Cacna2d2</i> | Voltage-          | High   | 9  | 9  | 11  | 8  | 1154 | 130.3 | 5.66 | 102  | 94.3  | 95.6  | 86.5  | 104.7 | 108.6 | 110.4 |
| Q91VJ2 | <i>Cavin3</i>   | Caveolae-         | Medium | 3  | 1  | 1   | 1  | 260  | 27.8  | 5.57 | 17   |       |       |       |       |       |       |
| Q7TMB8 | <i>Cyfp1</i>    | Cytoplasmic       | High   | 23 | 26 | 47  | 10 | 1253 | 145.1 | 6.9  | 759  | 99.3  | 99.9  | 108.5 | 99.9  | 95    | 97.4  |
| Q9JHI7 | <i>Exosc9</i>   | Exosome           | Medium | 2  | 1  | 1   | 1  | 438  | 48.9  | 5.11 | 24   |       |       |       |       |       |       |
| O35409 | <i>Folh1</i>    | Glutamate         | High   | 8  | 5  | 5   | 5  | 752  | 84.5  | 8.1  | 56   | 101.8 | 93.2  | 98.4  | 96.4  | 104.9 | 105.3 |
| Q9DCH4 | <i>Eif3f</i>    | Eukaryotic        | High   | 22 | 6  | 8   | 6  | 361  | 38    | 5.58 | 112  | 103.3 | 99.1  | 99.2  | 96.5  | 100.3 | 101.6 |
| Q8R574 | <i>Prpsap2</i>  | Phosphoribosyl    | High   | 33 | 10 | 17  | 7  | 369  | 40.9  | 7.17 | 308  | 95.1  | 96.7  | 102.1 | 100.4 | 102.1 | 103.7 |
| Q8R1H0 | <i>Hopx</i>     | Homeodomain-      | High   | 62 | 2  | 2   | 2  | 73   | 8.3   | 4.88 | 52   | 96.4  | 92.1  | 114.3 | 86.7  | 109.1 | 101.5 |
| Q00519 | <i>Xdh</i>      | Xanthine          | High   | 3  | 3  | 3   | 3  | 1335 | 146.5 | 7.56 | 49   | 124.2 | 106.1 | 156.8 | 78.5  | 68.1  | 66.3  |
| P26262 | <i>Klkb1</i>    | Plasma kallikrein | High   | 8  | 4  | 6   | 4  | 638  | 71.3  | 8.02 | 84   | 146.8 | 73.1  | 188.2 | 58.1  | 64.8  | 68.9  |
| P15331 | <i>Prph</i>     | Peripherin        | High   | 8  | 5  | 8   | 1  | 475  | 54.2  | 5.52 | 112  | 97    | 94.5  | 103.2 | 94.5  | 101.4 | 109.4 |
| O70293 | <i>Grk6</i>     | G protein-        | High   | 16 | 7  | 8   | 7  | 576  | 65.9  | 8.1  | 192  | 101   | 91.9  | 97.7  | 102.6 | 106.3 | 100.5 |
| Q9D8B7 | <i>Jam3</i>     | Junctional        | High   | 27 | 8  | 8   | 8  | 310  | 34.8  | 7.03 | 98   | 99    | 114.4 | 96.3  | 93    | 99.6  | 97.8  |
| Q9R0I7 | <i>Ylpm1</i>    | YLP motif-        | High   | 4  | 4  | 4   | 4  | 1386 | 155   | 6.65 | 68   | 95.5  | 101.3 | 98.1  | 102   | 100.8 | 102.3 |
| Q68FL4 | <i>Ahcyl2</i>   | Putative          | High   | 30 | 20 | 33  | 8  | 613  | 66.9  | 7.36 | 542  | 98.8  | 98.1  | 107.8 | 98    | 98.6  | 98.7  |
| P61963 | <i>Dcaf7</i>    | DDB1- and         | High   | 20 | 5  | 9   | 5  | 342  | 38.9  | 5.52 | 167  | 102.2 | 97.4  | 109.5 | 97    | 95.3  | 98.5  |
| P31938 | <i>Map2k1</i>   | Dual specificity  | High   | 33 | 12 | 30  | 7  | 393  | 43.4  | 6.7  | 411  | 100.1 | 101.9 | 101.6 | 102.1 | 98.8  | 95.6  |
| O88602 | <i>Cacng2</i>   | Voltage-          | High   | 20 | 5  | 7   | 3  | 323  | 35.9  | 8.98 | 97   | 96.8  | 104.1 | 91    | 103.9 | 99.9  | 104.3 |
| P59999 | <i>Arpc4</i>    | Actin-related     | High   | 57 | 8  | 14  | 8  | 168  | 19.7  | 8.43 | 223  | 98.9  | 99.4  | 98.7  | 100   | 102.4 | 100.6 |
| P35585 | <i>Ap1m1</i>    | AP-1 complex      | High   | 39 | 13 | 15  | 13 | 423  | 48.5  | 7.3  | 193  | 98.4  | 101.1 | 91.5  | 102.2 | 104.6 | 102.2 |
| P47856 | <i>Gfpt1</i>    | Glutamine--       | High   | 11 | 6  | 7   | 6  | 697  | 78.5  | 6.84 | 126  | 109.5 | 102.7 | 105.2 | 93.8  | 93.1  | 95.7  |
| Q8VCN9 | <i>Tbcc</i>     | Tubulin-specific  | High   | 15 | 4  | 4   | 4  | 341  | 38.1  | 5.3  | 79   | 96.6  | 95.4  | 94.7  | 99.4  | 108.2 | 105.7 |
| P61087 | <i>Ube2k</i>    | Ubiquitin-        | High   | 31 | 5  | 11  | 5  | 200  | 22.4  | 5.44 | 228  | 98.6  | 101.5 | 94.7  | 99    | 105   | 101.2 |
| Q8BPQ7 | <i>Sgsm1</i>    | Small G protein   | High   | 11 | 10 | 11  | 10 | 1093 | 123.1 | 5.66 | 196  | 98.7  | 97.4  | 100.7 | 96.3  | 101.2 | 105.7 |
| Q9JJY4 | <i>Ddx20</i>    | Probable ATP-     | High   | 2  | 1  | 1   | 1  | 825  | 91.7  | 6.74 | 16   | 99    | 92.2  | 95.3  | 105.5 | 104.6 | 103.5 |
| Q62293 | <i>Tgtp1</i>    | T-cell-specific   | High   | 7  | 3  | 3   | 3  | 415  | 47.1  | 5.74 | 78   | 96.4  | 107.3 | 170.1 | 79.4  | 73    | 73.8  |
| Q8CD19 | <i>Lancl3</i>   | LanC-like protein | Low    | 3  | 1  | 1   | 1  | 420  | 46.4  | 7.05 | 0    | 104.7 | 98.6  | 85    | 104.1 | 101   | 106.6 |
| E9Q8T7 | <i>Dnah1</i>    | Dynein heavy      | High   | 0  | 2  | 2   | 2  | 4250 | 486.8 | 5.57 | 14   | 93.9  | 110.5 | 91.9  | 98.4  | 108.5 | 96.8  |
| Q9QZD9 | <i>Eif3i</i>    | Eukaryotic        | High   | 19 | 6  | 9   | 6  | 325  | 36.4  | 5.64 | 114  | 102.1 | 99.7  | 110.8 | 96.3  | 96.2  | 94.9  |
| Q8K0D0 | <i>Cdk17</i>    | Cyclin-           | High   | 14 | 7  | 9   | 5  | 523  | 59.5  | 9.03 | 100  | 101.7 | 100.6 | 97.1  | 102.1 | 98.9  | 99.7  |

|        |                  |                   |        |    |    |     |    |      |       |       |      |       |       |       |       |       |       |
|--------|------------------|-------------------|--------|----|----|-----|----|------|-------|-------|------|-------|-------|-------|-------|-------|-------|
| P61264 | <i>Stx1b</i>     | Syntaxin-1B       | High   | 55 | 20 | 67  | 17 | 288  | 33.2  | 5.38  | 1162 | 100.5 | 100   | 86.2  | 102.5 | 107.4 | 103.4 |
| Q9JL56 | <i>Gde1</i>      | Glycerophospho    | High   | 21 | 6  | 8   | 6  | 331  | 37.6  | 6.9   | 121  | 102   | 105.4 | 102.6 | 100   | 93.6  | 96.5  |
| Q9Z1T1 | <i>Ap3b1</i>     | AP-3 complex      | High   | 8  | 8  | 10  | 4  | 1105 | 122.7 | 5.66  | 118  | 104.9 | 102.4 | 109.3 | 91.9  | 95.3  | 96.2  |
| Q6P6N5 | <i>Spred3</i>    | Sprouty-related,  | High   | 4  | 1  | 1   | 1  | 408  | 42.8  | 8.34  | 40   | 97.9  | 93.8  | 84.9  | 99.1  | 109.6 | 114.8 |
| Q99N92 | <i>Mrpl27</i>    | 39S ribosomal     | Medium | 5  | 1  | 1   | 1  | 148  | 15.9  | 10.17 | 24   | 98.2  | 100   | 94.4  | 111.3 | 105.1 | 90.9  |
| P70388 | <i>Rad50</i>     | DNA repair        | Low    | 1  | 1  | 1   | 1  | 1312 | 153.4 | 6.95  | 18   | 90.9  | 102.9 | 100   | 99.6  | 98.3  | 108.3 |
| Q05A62 | <i>Dnal1</i>     | Dynein light      | High   | 14 | 2  | 2   | 2  | 190  | 21.5  | 5.76  | 19   | 103.9 | 97.1  | 100.7 | 98.6  | 101.6 | 98.1  |
| P99029 | <i>Prdx5</i>     | Peroxiredoxin-5,  | High   | 60 | 11 | 60  | 11 | 210  | 21.9  | 8.85  | 1292 | 101.4 | 105.9 | 98.4  | 99.4  | 99.3  | 95.6  |
| P04370 | <i>Mbp</i>       | Myelin basic      | High   | 25 | 7  | 97  | 7  | 250  | 27.2  | 9.58  | 1683 | 91    | 122.2 | 97.2  | 98.2  | 95.3  | 96    |
| Q9D394 | <i>Rufy3</i>     | Protein RUFY3     | High   | 38 | 16 | 25  | 15 | 469  | 53    | 5.49  | 465  | 98.8  | 101.2 | 91.9  | 103   | 103.6 | 101.6 |
| Q91YR5 | <i>EEF1AKNMT</i> | eEF1A lysine      | High   | 2  | 1  | 1   | 1  | 698  | 78.7  | 6.83  | 44   | 89.6  | 108.6 | 101.7 | 102.5 | 104.6 | 92.9  |
| Q8BSA9 | <i>Tyw3</i>      | tRNA              | Medium | 5  | 1  | 1   | 1  | 257  | 28.6  | 7.78  | 0    | 105.6 | 102.9 | 86.9  | 105.4 | 101.9 | 97.3  |
| P62814 | <i>Atp6v1b2</i>  | V-type proton     | High   | 76 | 27 | 111 | 27 | 511  | 56.5  | 5.81  | 2296 | 96    | 96.3  | 95.3  | 103.4 | 105.6 | 103.4 |
| Q3V1U8 | <i>Elmod1</i>    | ELMO domain-      | High   | 12 | 3  | 5   | 3  | 326  | 38    | 8.4   | 68   | 92.9  | 99.2  | 91.6  | 104.9 | 104.7 | 106.7 |
| Q3UHQ6 | <i>Dop1b</i>     | Protein dopey-2   | High   | 1  | 2  | 3   | 1  | 2295 | 257.3 | 6.13  | 68   |       |       |       |       |       |       |
| Q80U23 | <i>Snph</i>      | Syntaphilin       | High   | 20 | 7  | 8   | 7  | 495  | 53.7  | 5.9   | 129  | 94.2  | 97.5  | 94.6  | 105   | 97.5  | 111.1 |
| Q5SWU9 | <i>Acaca</i>     | Acetyl-CoA        | High   | 12 | 22 | 27  | 22 | 2345 | 265.1 | 6.39  | 435  | 99.8  | 102.3 | 102.8 | 98.7  | 99    | 97.5  |
| Q80VC9 | <i>Camsap3</i>   | Calmodulin-       | High   | 7  | 6  | 10  | 6  | 1252 | 135.1 | 8.43  | 106  | 94    | 96.8  | 86.2  | 100.6 | 111.9 | 110.5 |
| Q920Q6 | <i>Msi2</i>      | RNA-binding       | High   | 14 | 4  | 4   | 3  | 346  | 36.9  | 8.47  | 71   | 96.2  | 108.4 | 92.4  | 99    | 106.9 | 97.2  |
| Q9CY97 | <i>Ssu72</i>     | RNA polymerase    | High   | 12 | 2  | 2   | 2  | 194  | 22.5  | 5.21  | 24   | 100.4 | 102.1 | 96.4  | 99.8  | 106   | 95.3  |
| Q3UE31 |                  | Uncharacterized   | High   | 5  | 2  | 2   | 2  | 404  | 45.9  | 8.13  | 17   | 95.3  | 102.9 | 97.7  | 105   | 101   | 98.2  |
| Q9CWD8 | <i>Nubpl</i>     | Iron-sulfur       | High   | 3  | 1  | 1   | 1  | 319  | 34.1  | 9.07  | 38   | 89.4  | 107.5 | 90.6  | 104.2 | 105.4 | 102.9 |
| P08122 | <i>Col4a2</i>    | Collagen alpha-   | Medium | 1  | 1  | 1   | 1  | 1707 | 167.2 | 8.48  | 0    |       |       |       |       |       |       |
| Q8R4I7 | <i>Neto1</i>     | Neuropilin and    | High   | 10 | 3  | 3   | 3  | 533  | 60.2  | 6.99  | 32   | 92.4  | 99.1  | 91    | 102.8 | 100   | 114.7 |
| Q6NS82 | <i>Retreg2</i>   | Reticulophagy     | High   | 7  | 2  | 2   | 2  | 541  | 57.5  | 4.46  | 30   | 104.9 | 90.6  | 109.2 | 97.7  | 92.4  | 105.3 |
| Q6PER3 | <i>Mapre3</i>    | Microtubule-      | High   | 49 | 12 | 22  | 10 | 281  | 31.9  | 5.54  | 361  | 97.4  | 103.4 | 89.1  | 102.7 | 101.8 | 105.6 |
| Q9CQ26 | <i>Stambp</i>    | STAM-binding      | High   | 11 | 4  | 5   | 4  | 424  | 48.5  | 6.64  | 50   | 95.3  | 100.9 | 98.1  | 96.8  | 100.1 | 108.6 |
| Q02257 | <i>Jup</i>       | Junction          | High   | 17 | 10 | 16  | 6  | 745  | 81.7  | 6.14  | 213  | 93.8  | 94.1  | 101.5 | 102.1 | 109.3 | 99.2  |
| Q9D1H8 | <i>Mrpl53</i>    | 39S ribosomal     | High   | 27 | 3  | 3   | 3  | 118  | 12.7  | 9.52  | 21   | 99.4  | 105.2 | 94.5  | 102   | 100.1 | 98.8  |
| Q8BTV1 | <i>Tusc3</i>     | Tumor             | High   | 7  | 3  | 3   | 2  | 347  | 39.5  | 10.11 | 28   | 101.1 | 104.1 | 96.7  | 99.6  | 98.6  | 99.9  |
| Q5KU39 | <i>Vps41</i>     | Vacuolar protein  | High   | 8  | 5  | 6   | 5  | 853  | 98.5  | 5.81  | 164  | 104.8 | 98.1  | 104.5 | 91    | 99.2  | 102.4 |
| B9EHT4 | <i>Clip3</i>     | CAP-Gly           | High   | 12 | 5  | 6   | 5  | 547  | 59.5  | 7.94  | 85   | 98.8  | 101.4 | 98.2  | 103   | 100.8 | 97.9  |
| Q6PCN3 | <i>Ttbk1</i>     | Tau-tubulin       | Medium | 2  | 1  | 1   | 1  | 1308 | 141.5 | 5.62  | 14   | 80.6  | 99.3  | 81.8  | 107.7 | 117.3 | 113.3 |
| Q9EP69 | <i>Sacm1l</i>    | Phosphatidylinos  | High   | 18 | 9  | 13  | 9  | 587  | 66.9  | 7.3   | 251  | 101.2 | 103.3 | 104.8 | 96.2  | 97.5  | 97    |
| O88271 | <i>Ctdp1</i>     | Craniofacial      | High   | 9  | 3  | 3   | 3  | 295  | 32.9  | 4.86  | 39   | 96.7  | 94.4  | 100.6 | 100.3 | 103.2 | 104.9 |
| Q8BIF2 | <i>Rbfox3</i>    | RNA binding       | High   | 12 | 3  | 5   | 2  | 374  | 40.6  | 7.9   | 58   | 99.4  | 99    | 108.1 | 100.6 | 97.6  | 95.4  |
| Q9D7H3 | <i>RtcA</i>      | RNA 3'-terminal   | High   | 13 | 4  | 8   | 4  | 366  | 39.2  | 7.9   | 138  | 95.9  | 105   | 103.1 | 103.3 | 95.5  | 97.1  |
| Q62470 | <i>Itga3</i>     | Integrin alpha-3  | Medium | 1  | 1  | 1   | 1  | 1053 | 116.7 | 6.57  | 0    |       |       |       |       |       |       |
| Q9D1N9 | <i>Mrpl21</i>    | 39S ribosomal     | High   | 27 | 4  | 4   | 4  | 209  | 23.4  | 9.99  | 35   | 98.4  | 92.4  | 97    | 106.7 | 102.8 | 102.7 |
| Q9R061 | <i>Nubp2</i>     | Cytosolic Fe-S    | High   | 9  | 2  | 2   | 2  | 275  | 29.5  | 6.52  | 28   | 95.5  | 110.2 | 98.4  | 96.8  | 91.8  | 107.3 |
| Q61285 | <i>Abcd2</i>     | ATP-binding       | High   | 4  | 3  | 3   | 3  | 741  | 83.4  | 9.09  | 30   | 101   | 99.6  | 102   | 102.2 | 96.2  | 99    |
| P21981 | <i>Tgm2</i>      | Protein-          | High   | 22 | 11 | 15  | 11 | 686  | 77    | 5.1   | 326  | 118.5 | 115.5 | 155   | 66.9  | 71.6  | 72.6  |
| Q9D6F9 | <i>Tubb4a</i>    | Tubulin beta-4A   | High   | 74 | 25 | 319 | 5  | 444  | 49.6  | 4.88  | 5732 | 99.6  | 113.3 | 82.7  | 106.3 | 96.4  | 101.6 |
| P56564 | <i>Slc1a3</i>    | Excitatory amino  | High   | 23 | 9  | 53  | 8  | 543  | 59.6  | 8.4   | 1157 | 96.5  | 98.3  | 98.1  | 103.2 | 102.6 | 101.2 |
| P60867 | <i>Rps20</i>     | 40S ribosomal     | High   | 26 | 3  | 5   | 3  | 119  | 13.4  | 9.94  | 99   | 100.9 | 97.5  | 108.4 | 99.8  | 97.1  | 96.3  |
| Q9QX60 | <i>Dguok</i>     | Deoxyguanosine    | High   | 14 | 2  | 2   | 2  | 277  | 32.3  | 7.66  | 68   | 123.2 | 83.5  | 170.6 | 67.3  | 73    | 82.3  |
| Q05920 | <i>Pc</i>        | Pyruvate          | High   | 37 | 38 | 58  | 38 | 1178 | 129.6 | 6.71  | 997  | 95.8  | 105   | 93.6  | 102.7 | 100.6 | 102.3 |
| P62340 | <i>Tbp1</i>      | TATA box-         | Medium | 6  | 1  | 1   | 1  | 186  | 20.9  | 9.54  | 23   |       |       |       |       |       |       |
| Q6NS60 | <i>Fbxo41</i>    | F-box only        | High   | 21 | 14 | 19  | 14 | 873  | 94.3  | 8.24  | 311  | 90.1  | 97.8  | 88.5  | 110.4 | 103.3 | 109.8 |
| Q62448 | <i>Eif4g2</i>    | Eukaryotic        | High   | 19 | 17 | 19  | 17 | 906  | 102   | 7.14  | 198  | 108   | 100.8 | 109.1 | 95.1  | 93.2  | 93.8  |
| Q91XM9 | <i>Dlg2</i>      | Disks large       | High   | 39 | 27 | 51  | 25 | 852  | 94.8  | 6.24  | 1081 | 94.2  | 95.7  | 88.1  | 107.3 | 107.6 | 107.1 |
| Q9JKF7 | <i>Mrpl39</i>    | 39S ribosomal     | High   | 16 | 5  | 6   | 5  | 336  | 38.5  | 7.94  | 99   | 96.7  | 96.3  | 91.1  | 105.6 | 107.1 | 103.2 |
| Q64310 | <i>Surf4</i>     | Surfeit locus     | High   | 14 | 3  | 3   | 3  | 269  | 30.4  | 7.78  | 63   | 93.5  | 103   | 102.9 | 100.6 | 95.5  | 104.4 |
| Q9WU28 | <i>Pfdn5</i>     | Prefoldin subunit | High   | 71 | 8  | 15  | 8  | 154  | 17.3  | 6.33  | 275  | 102.2 | 97    | 100.8 | 100.2 | 99.3  | 100.6 |
| O70589 | <i>Cask</i>      | Peripheral        | High   | 27 | 20 | 25  | 20 | 926  | 105   | 6.43  | 406  | 95.7  | 102.7 | 96.3  | 104.2 | 100   | 101.1 |
| Q8R0S2 | <i>lqsec1</i>    | IQ motif and      | High   | 32 | 28 | 35  | 22 | 961  | 107.9 | 7.14  | 535  | 95.9  | 98.1  | 92.6  | 103   | 104.6 | 105.9 |
| P51859 | <i>Hdgf</i>      | Hepatoma-         | High   | 34 | 8  | 13  | 7  | 237  | 26.3  | 4.83  | 167  | 98.2  | 97.9  | 104.4 | 100.9 | 98.5  | 100   |
| Q99LU0 | <i>Chmp1b1</i>   | Charged           | High   | 5  | 1  | 1   | 1  | 199  | 22.1  | 8.1   | 24   |       |       |       |       |       |       |
| Q8VH51 | <i>Rbm39</i>     | RNA-binding       | High   | 18 | 8  | 11  | 8  | 530  | 59.4  | 10.1  | 172  | 99.1  | 102.5 | 98.4  | 96.5  | 101.7 | 101.8 |
| Q9D517 | <i>Agpat3</i>    | 1-acyl-sn-        | High   | 17 | 6  | 6   | 6  | 376  | 43.3  | 8.51  | 90   | 100.9 | 104   | 102.2 | 101.8 | 97.9  | 93.2  |
| P63158 | <i>Hmgb1</i>     | High mobility     | High   | 33 | 9  | 15  | 8  | 215  | 24.9  | 5.74  | 160  | 109.6 | 97.7  | 116.6 | 87.9  | 96    | 92.3  |
| D3YXK2 | <i>Safb</i>      | Scaffold          | High   | 17 | 10 | 13  | 5  | 937  | 105   | 5.35  | 277  | 99.6  | 98.6  | 98.9  | 99.5  | 101.8 | 101.5 |
| Q3V038 | <i>Ttc9</i>      | Tetratricopeptide | High   | 4  | 1  | 2   | 1  | 219  | 24.3  | 8.85  | 30   | 92.4  | 96.5  | 96.7  | 103.1 | 102.6 | 108.7 |
| Q80YA3 | <i>Ddhd1</i>     | Phospholipase     | High   | 12 | 5  | 5   | 5  | 547  | 61.8  | 6.61  | 70   | 98.2  | 100.2 | 97.3  | 103.7 | 101.3 | 99.3  |
| Q3UGP9 | <i>Lrrc58</i>    | Leucine-rich      | High   | 4  | 1  | 1   | 1  | 366  | 40.1  | 6.62  | 0    |       |       |       |       |       |       |
| Q9R0P3 | <i>Esd</i>       | S-                | High   | 44 | 9  | 16  | 9  | 282  | 31.3  | 7.12  | 380  | 98.5  | 102.9 | 102   | 101.1 | 97.5  | 97.9  |
| Q91W78 | <i>Usb1</i>      | U6 snRNA          | Low    | 7  | 1  | 1   | 1  | 267  | 30.2  | 5.63  | 0    |       |       |       |       |       |       |
| Q9CRD2 | <i>Emc2</i>      | ER membrane       | High   | 26 | 6  | 7   | 6  | 297  | 34.9  | 6.81  | 103  | 99.9  | 94.5  | 101.6 | 102.9 | 90.9  | 110.2 |

|        |                 |                   |        |    |    |    |    |      |       |      |     |       |       |       |       |       |       |
|--------|-----------------|-------------------|--------|----|----|----|----|------|-------|------|-----|-------|-------|-------|-------|-------|-------|
| Q61337 | <i>Bad</i>      | Bcl2-associated   | High   | 26 | 3  | 3  | 3  | 204  | 22.1  | 9.17 | 41  | 97.2  | 96.1  | 99.6  | 91.8  | 99.5  | 115.8 |
| Q6ZQH8 | <i>Nup188</i>   | Nucleoporin       | High   | 1  | 1  | 1  | 1  | 1759 | 196.6 | 7.01 | 41  | 94    | 98    | 93.7  | 104.7 | 111.1 | 98.6  |
| P62254 | <i>Ube2g1</i>   | Ubiquitin-        | High   | 6  | 1  | 1  | 1  | 170  | 19.5  | 5.3  | 54  |       |       |       |       |       |       |
| D3Z4S3 | <i>Pthr1</i>    | Putative          | High   | 21 | 4  | 5  | 4  | 140  | 16    | 9.32 | 65  | 98.6  | 99.5  | 88.3  | 106.8 | 102.3 | 104.4 |
| Q9D009 | <i>Lipt2</i>    | Putative          | High   | 13 | 2  | 2  | 2  | 231  | 24.9  | 8.6  | 0   | 107   | 104.8 | 86.6  | 100.5 | 96.8  | 104.2 |
| Q99NF2 | <i>Nsmf</i>     | NMDA receptor     | High   | 16 | 7  | 9  | 7  | 532  | 60.3  | 8.98 | 100 | 94.5  | 95.4  | 92.5  | 107.9 | 108.5 | 101.3 |
| Q8BKC8 | <i>Pi4kb</i>    | Phosphatidylinos  | Medium | 1  | 1  | 1  | 1  | 816  | 91.5  | 6.32 | 18  |       |       |       |       |       |       |
| Q8R3U1 | <i>Plaat3</i>   | Phospholipase A   | Medium | 6  | 1  | 1  | 1  | 162  | 17.9  | 8.72 | 21  | 94.6  | 78.7  | 83.4  | 125.5 | 79.7  | 138   |
| P32233 | <i>Drg1</i>     | Developmentally   | High   | 26 | 8  | 10 | 7  | 367  | 40.5  | 8.9  | 192 | 102.9 | 100.6 | 105   | 96.3  | 94.7  | 100.4 |
| Q8K093 | <i>Trhde</i>    | Thyrotropin-      | High   | 1  | 1  | 2  | 1  | 1025 | 117.4 | 7.06 | 0   | 109   | 91.1  | 82.3  | 98.5  | 104.4 | 114.8 |
| P70202 | <i>Lxn</i>      | Latexin OS=Mus    | High   | 31 | 5  | 9  | 5  | 222  | 25.5  | 5.74 | 208 | 103.5 | 105.2 | 108.3 | 94.9  | 96.6  | 91.5  |
| P0DP60 | <i>Lynx1</i>    | Ly-6/neurotoxin-  | Low    | 14 | 1  | 1  | 1  | 116  | 12.8  | 8.19 | 0   | 77.6  | 104.8 | 132.2 | 108.2 | 72.5  | 104.7 |
| Q9ESK9 | <i>Rb1cc1</i>   | RB1-inducible     | High   | 2  | 3  | 3  | 3  | 1588 | 182.2 | 5.49 | 49  | 104.2 | 101.4 | 99.1  | 99    | 97.6  | 98.8  |
| Q8C7K6 | <i>Pcyox1l</i>  | Prenylcysteine    | High   | 4  | 2  | 2  | 2  | 495  | 54.8  | 7.65 | 35  | 93.7  | 95.5  | 103   | 101.9 | 109.6 | 96.4  |
| Q7TQ95 | <i>Lnpg</i>     | Endoplasmic       | High   | 28 | 11 | 15 | 11 | 425  | 47.5  | 5.27 | 208 | 97    | 99.4  | 96.1  | 103.9 | 103   | 100.6 |
| Q8C0Y0 | <i>Ppp4r4</i>   | Serine/threonine  | High   | 6  | 4  | 4  | 4  | 875  | 99.4  | 7.71 | 79  | 98.8  | 100.8 | 93.3  | 100.7 | 101.2 | 105.2 |
| Q8VCX5 | <i>Micu1</i>    | Calcium uptake    | High   | 23 | 10 | 12 | 10 | 477  | 54.3  | 8.59 | 107 | 93.5  | 100.4 | 85.2  | 106.8 | 105.8 | 108.4 |
| Q6PF93 | <i>Pik3c3</i>   | Phosphatidylinos  | High   | 18 | 13 | 14 | 13 | 887  | 101.4 | 6.73 | 231 | 102.4 | 97.4  | 97.8  | 103.9 | 101.5 | 97    |
| Q9D1H6 | <i>Ndufaf4</i>  | NADH              | High   | 38 | 7  | 8  | 7  | 173  | 20.1  | 9.39 | 73  | 97.2  | 104.9 | 91.1  | 103.2 | 101.6 | 102   |
| Q921M7 | <i>Cyrib</i>    | CYFIP-related     | High   | 62 | 16 | 31 | 14 | 324  | 36.8  | 6.06 | 702 | 98.8  | 100   | 94    | 103.2 | 101.9 | 102.1 |
| Q8R086 | <i>Suox</i>     | Sulfite oxidase,  | High   | 2  | 1  | 1  | 1  | 546  | 60.7  | 6.54 | 0   |       |       |       |       |       |       |
| Q9Z1L5 | <i>Cacna2d3</i> | Voltage-          | High   | 19 | 17 | 23 | 17 | 1091 | 122.7 | 5.73 | 413 | 93.9  | 98.8  | 91    | 105.5 | 104.8 | 106   |
| Q61481 | <i>Pde1a</i>    | Calcium/calmod    | High   | 40 | 17 | 30 | 16 | 545  | 62.3  | 5.91 | 595 | 103.9 | 96.3  | 103.2 | 98    | 99.7  | 98.9  |
| Q9ET77 | <i>Jph3</i>     | Junctophilin-3    | High   | 8  | 6  | 8  | 6  | 744  | 81.2  | 9.22 | 149 | 95.4  | 104   | 92.1  | 103.6 | 104.9 | 100   |
| Q8BJ42 | <i>Dlgap2</i>   | Disks large-      | High   | 18 | 15 | 20 | 14 | 1059 | 119   | 6.81 | 427 | 90.7  | 101.5 | 85.9  | 110.7 | 108   | 103.1 |
| P97461 | <i>Rps5</i>     | 40S ribosomal     | High   | 38 | 6  | 11 | 6  | 204  | 22.9  | 9.72 | 192 | 104.6 | 99.9  | 109.4 | 96    | 95.4  | 94.7  |
| Q8BIP0 | <i>Dars2</i>    | Aspartate--tRNA   | Low    | 1  | 1  | 1  | 1  | 653  | 74.1  | 6.98 | 21  | 104.2 | 92.4  | 85    | 108.2 | 110.7 | 99.6  |
| Q3UND0 | <i>Skap2</i>    | Src kinase-       | Low    | 3  | 1  | 1  | 1  | 358  | 40.7  | 4.7  | 0   | 111.8 | 106.5 | 120.2 | 92    | 83.3  | 86.1  |
| Q70FJ1 | <i>Akap9</i>    | A-kinase anchor   | High   | 1  | 2  | 2  | 2  | 3797 | 435.9 | 5.03 | 28  | 95.9  | 108.5 | 99    | 97.5  | 102   | 97.2  |
| Q63918 | <i>Cavin2</i>   | Caveolae-         | High   | 4  | 1  | 1  | 1  | 418  | 46.7  | 5.21 | 50  | 89.4  | 99.1  | 104.8 | 95.7  | 110.3 | 100.6 |
| Q8CD94 | <i>Lin52</i>    | Protein lin-52    | Low    | 11 | 1  | 1  | 1  | 116  | 13    | 4.98 | 0   | 104.6 | 109   | 88    | 101.5 | 96.7  | 100.2 |
| P47738 | <i>Aldh2</i>    | Aldehyde          | High   | 52 | 20 | 40 | 19 | 519  | 56.5  | 7.62 | 788 | 97.7  | 102.1 | 101.9 | 101   | 98.8  | 98.5  |
| Q3UVL4 | <i>Vps51</i>    | Vacuolar protein  | High   | 26 | 16 | 19 | 16 | 782  | 86.1  | 6.24 | 279 | 92.4  | 97    | 94.2  | 102   | 107.1 | 107.3 |
| Q60790 | <i>Rasa3</i>    | Ras GTPase-       | High   | 10 | 8  | 10 | 7  | 834  | 95.9  | 7.34 | 148 | 104.7 | 96.8  | 104.6 | 95.6  | 92.8  | 105.5 |
| Q8BVF2 | <i>Pdcl3</i>    | Phosducin-like    | High   | 9  | 2  | 3  | 2  | 240  | 27.6  | 4.72 | 49  | 100.2 | 96.5  | 104.6 | 92.3  | 95.6  | 110.7 |
| Q9R1Q9 | <i>Atp6ap1</i>  | V-type proton     | High   | 17 | 7  | 7  | 7  | 463  | 51    | 5.92 | 130 | 100.3 | 99.5  | 99.9  | 104.6 | 98.9  | 96.8  |
| Q3TMP8 | <i>Tmem38a</i>  | Trimeric          | Medium | 6  | 1  | 2  | 1  | 298  | 33.3  | 8.37 | 22  |       |       |       |       |       |       |
| Q64514 | <i>Tpp2</i>     | Tripeptidyl-      | High   | 23 | 25 | 38 | 25 | 1262 | 139.8 | 6.58 | 576 | 95.2  | 99.5  | 92    | 104.7 | 104.1 | 104.5 |
| P38585 | <i>Ttl</i>      | Tubulin--tyrosine | High   | 3  | 1  | 1  | 1  | 377  | 43.1  | 6.46 | 39  | 93.7  | 100.7 | 94    | 104.6 | 103.8 | 103.3 |
| P50586 | <i>Tub</i>      | Tubby protein     | High   | 5  | 2  | 2  | 2  | 505  | 55.3  | 8.68 | 39  | 103.3 | 102   | 76.3  | 103.1 | 110.8 | 104.5 |
| P56528 | <i>Cd38</i>     | ADP-ribosyl       | High   | 8  | 2  | 3  | 2  | 304  | 34.4  | 8.29 | 54  | 98.5  | 95.4  | 109.2 | 99.1  | 96.4  | 101.3 |
| Q9CXR1 | <i>Dhrs7</i>    | Dehydrogenase/    | High   | 17 | 5  | 5  | 5  | 338  | 38.1  | 8.32 | 84  | 99.4  | 102.7 | 105.3 | 96.6  | 96.5  | 99.6  |
| Q3UN16 | <i>Gpr162</i>   | Probable G-       | High   | 7  | 3  | 3  | 3  | 588  | 64.1  | 8.79 | 51  | 103.9 | 98.8  | 98.8  | 100.9 | 98    | 99.6  |
| Q9CQV1 | <i>Pam16</i>    | Mitochondrial     | High   | 12 | 2  | 3  | 2  | 125  | 13.8  | 9.64 | 23  | 98.9  | 103.3 | 96.4  | 101.2 | 101.2 | 98.9  |
| Q924D0 | <i>Rtn4ip1</i>  | Reticulon-4-      | High   | 10 | 3  | 4  | 3  | 396  | 43.3  | 9.2  | 52  | 89.5  | 95.5  | 98    | 109.1 | 101.2 | 106.7 |
| Q8BK72 | <i>Mrps27</i>   | 28S ribosomal     | High   | 23 | 8  | 10 | 8  | 415  | 47.7  | 5.5  | 210 | 97    | 103.6 | 95.7  | 102.9 | 100.2 | 100.5 |
| P82343 | <i>Renbp</i>    | N-                | Low    | 3  | 1  | 1  | 1  | 430  | 49.7  | 6.06 | 17  | 142   | 114.3 | 137.2 | 51.3  | 52.8  | 102.5 |
| Q9QYC0 | <i>Add1</i>     | Alpha-adducin     | High   | 34 | 20 | 49 | 19 | 735  | 80.6  | 5.9  | 814 | 98.6  | 99.2  | 97    | 99.7  | 102.9 | 102.6 |
| Q99JX3 | <i>Gorasp2</i>  | Golgi             | High   | 18 | 6  | 7  | 6  | 451  | 47    | 4.79 | 166 | 100.9 | 103.5 | 100.3 | 96.8  | 99.1  | 99.4  |
| Q9D0M0 | <i>Exosc7</i>   | Exosome           | Medium | 5  | 1  | 1  | 1  | 291  | 31.8  | 5.19 | 26  | 110.8 | 88.6  | 116.1 | 101.2 | 89.9  | 93.4  |
| Q8CEC5 | <i>Nkiras1</i>  | NF-kappa-B        | High   | 27 | 5  | 6  | 5  | 192  | 21.6  | 7.33 | 110 | 91.8  | 94.9  | 84.4  | 108.3 | 113.5 | 107.1 |
| Q9DB94 | <i>Wdr53</i>    | WD repeat-        | Low    | 8  | 1  | 1  | 1  | 358  | 38.6  | 7.09 | 0   |       |       |       |       |       |       |
| Q7TMS5 | <i>Abcg2</i>    | Broad substrate   | High   | 3  | 2  | 2  | 2  | 657  | 72.9  | 8.54 | 39  | 96.5  | 94.7  | 101.5 | 104.8 | 101.1 | 101.3 |
| Q62172 | <i>Ralbp1</i>   | RalA-binding      | High   | 11 | 6  | 8  | 6  | 648  | 75    | 5.92 | 100 | 96    | 100.2 | 89.6  | 100   | 103.4 | 110.9 |
| E9Q6P5 | <i>Ttc7b</i>    | Tetratricopeptide | High   | 23 | 17 | 22 | 17 | 843  | 94.1  | 6.9  | 345 | 99.4  | 99.8  | 95.7  | 101.1 | 103.9 | 100.1 |
| Q9D6W8 | <i>Borcs6</i>   | BLOC-1-related    | High   | 10 | 3  | 3  | 3  | 360  | 38    | 5.34 | 58  | 102.1 | 100.2 | 90.2  | 95    | 99.2  | 113.3 |
| Q810C1 | <i>Slitrk1</i>  | SLIT and NTRK-    | High   | 3  | 2  | 2  | 2  | 696  | 77.8  | 6.49 | 25  | 91.2  | 93.4  | 83    | 111.2 | 113.2 | 107.9 |
| Q8BG18 | <i>Necab1</i>   | N-terminal EF-    | High   | 13 | 3  | 4  | 3  | 352  | 40.9  | 4.89 | 157 | 97.9  | 82.6  | 114.9 | 87.9  | 108.4 | 108.3 |
| Q62074 | <i>Prkci</i>    | Protein kinase C  | High   | 2  | 1  | 1  | 1  | 595  | 68.2  | 5.85 | 0   | 100.5 | 104.5 | 91.1  | 113.6 | 87.1  | 103.2 |
| Q99N16 | <i>Cyp4f3</i>   | Cytochrome        | Medium | 2  | 1  | 1  | 1  | 524  | 59.8  | 8.53 | 28  | 97.7  | 92.2  | 119   | 102.4 | 81.4  | 107.2 |
| Q8QZV4 | <i>Stk32c</i>   | Serine/threonine  | High   | 16 | 5  | 5  | 5  | 488  | 55.2  | 6.16 | 33  | 130   | 87    | 145.3 | 78.8  | 77.3  | 81.6  |
| Q9CQJ6 | <i>Denr</i>     | Density-          | High   | 21 | 3  | 4  | 3  | 198  | 22.2  | 5.3  | 127 | 109.3 | 95.8  | 103.1 | 96.6  | 97.6  | 97.6  |
| Q9EQH3 | <i>Vps35</i>    | Vacuolar protein  | High   | 35 | 26 | 45 | 26 | 796  | 91.7  | 5.44 | 777 | 99.4  | 101   | 97.9  | 104   | 98.5  | 99.2  |
| P21300 | <i>Akr1b7</i>   | Aldo-keto         | High   | 11 | 5  | 5  | 5  | 316  | 36    | 7.25 | 54  | 104.6 | 114.5 | 111.9 | 91.7  | 88.6  | 88.7  |
| Q921Z5 | <i>Tnfrsf8</i>  | Tumor necrosis    | High   | 18 | 3  | 3  | 3  | 198  | 22.9  | 7.93 | 62  | 92.4  | 117.8 | 92.2  | 103.2 | 81.3  | 113.1 |
| Q8VCA8 | <i>Scrn2</i>    | Secernin-2        | Medium | 6  | 1  | 1  | 1  | 425  | 46.6  | 5.71 | 0   | 127.4 | 131.6 | 74    | 55.6  | 148.7 | 62.7  |
| O89029 | <i>Matn4</i>    | Matrilin-4        | High   | 2  | 1  | 1  | 1  | 624  | 68.9  | 5.76 | 32  | 98.8  | 99    | 88.3  | 90.8  | 109.9 | 113.2 |
| Q794H2 | <i>Nap1l3</i>   | Nucleosome        | Medium | 2  | 1  | 1  | 1  | 544  | 61.3  | 4.79 | 15  | 62.9  | 96.7  | 85    | 121.9 | 110.4 | 123.1 |

|        |                 |                   |        |    |    |     |    |      |       |       |      |       |       |       |       |       |       |
|--------|-----------------|-------------------|--------|----|----|-----|----|------|-------|-------|------|-------|-------|-------|-------|-------|-------|
| Q9R1B9 | <i>Slit2</i>    | Slit homolog 2    | High   | 2  | 2  | 2   | 2  | 1521 | 168.7 | 7.11  | 36   | 100.2 | 115.3 | 82.4  | 115.2 | 84.7  | 102.3 |
| Q80U56 | <i>Avl9</i>     | Late secretory    | High   | 12 | 6  | 6   | 6  | 649  | 72.1  | 6.14  | 50   | 95.3  | 100.2 | 104.4 | 102.6 | 98.7  | 99    |
| Q0VBF8 | <i>Stum</i>     | Protein stum      | High   | 12 | 1  | 3   | 1  | 141  | 15    | 7.21  | 139  | 101.7 | 89.8  | 100.3 | 94.3  | 110.8 | 103.1 |
| P81117 | <i>Nucb2</i>    | Nucleobindin-2    | High   | 3  | 1  | 1   | 1  | 420  | 50.3  | 5.15  | 41   | 101.8 | 106   | 92.2  | 99.3  | 99.9  | 100.7 |
| P50516 | <i>Atp6v1a</i>  | V-type proton     | High   | 70 | 35 | 118 | 35 | 617  | 68.3  | 5.58  | 2450 | 96.6  | 98.9  | 92.7  | 102.8 | 105   | 104   |
| Q5SSH8 | <i>Cyb5d2</i>   | Neuferricin       | Medium | 3  | 1  | 1   | 1  | 263  | 29.1  | 7.42  | 20   | 91.1  | 107.1 | 98.5  | 98.8  | 94.5  | 110   |
| Q9R0S3 | <i>Mmp17</i>    | Matrix            | Medium | 3  | 1  | 1   | 1  | 578  | 64.3  | 6.38  | 0    |       |       |       |       |       |       |
| P48024 | <i>Eif1</i>     | Eukaryotic        | High   | 43 | 4  | 5   | 1  | 113  | 12.7  | 7.44  | 124  | 92.5  | 100.4 | 92.4  | 108.7 | 101.2 | 104.8 |
| P04940 |                 | Ig kappa chain    | Medium | 7  | 1  | 1   | 1  | 107  | 11.6  | 9.36  | 18   |       |       |       |       |       |       |
| Q9JMD0 | <i>Znf207</i>   | BUB3-interacting  | High   | 7  | 3  | 3   | 3  | 495  | 52.8  | 9.1   | 67   | 95.1  | 94.1  | 98.3  | 101.7 | 105.6 | 105.3 |
| Q07813 | <i>Bax</i>      | Apoptosis         | Medium | 11 | 1  | 1   | 1  | 192  | 21.4  | 4.98  | 29   | 100.2 | 97.6  | 112.3 | 103.1 | 94.3  | 92.5  |
| Q8BXK8 | <i>Agap1</i>    | Arf-GAP with      | High   | 10 | 6  | 9   | 3  | 857  | 94.4  | 7.94  | 128  | 102.2 | 88    | 120.7 | 94.9  | 94.5  | 99.7  |
| P62322 | <i>Lsm5</i>     | U6 snRNA-         | High   | 46 | 2  | 3   | 2  | 91   | 9.9   | 4.54  | 119  | 98.7  | 102.9 | 90.8  | 97.2  | 105.1 | 105.2 |
| O89001 | <i>Cpd</i>      | Carboxypeptidas   | High   | 4  | 6  | 6   | 6  | 1377 | 152.3 | 6.18  | 97   | 92.6  | 95.9  | 101.1 | 102.6 | 100.9 | 106.8 |
| Q9D1H7 | <i>Get4</i>     | Golgi to ER       | High   | 11 | 3  | 3   | 3  | 327  | 36.5  | 5.41  | 28   | 80.7  | 96.9  | 105.4 | 94.8  | 111.6 | 110.7 |
| P47199 | <i>Cryz</i>     | Quinone           | High   | 37 | 7  | 11  | 7  | 331  | 35.2  | 8.07  | 250  | 105.9 | 104.3 | 105.9 | 93.7  | 97.3  | 92.9  |
| O35099 | <i>Map3k5</i>   | Mitogen-          | High   | 6  | 7  | 9   | 7  | 1380 | 154.4 | 5.78  | 143  | 94.9  | 96.4  | 93.8  | 107.4 | 100.7 | 106.8 |
| Q99KY4 | <i>Gak</i>      | Cyclin-G-         | High   | 16 | 17 | 25  | 15 | 1305 | 143.6 | 5.73  | 383  | 95.5  | 96.7  | 94.8  | 104.9 | 103.3 | 104.8 |
| Q6PEV3 | <i>Wipf2</i>    | WAS/WASL-         | High   | 7  | 3  | 4   | 3  | 440  | 46.3  | 10.99 | 49   | 95.7  | 96.2  | 89.7  | 105   | 106.5 | 106.9 |
| Q62165 | <i>Dag1</i>     | Dystroglycan      | High   | 6  | 5  | 6   | 5  | 893  | 96.8  | 8.44  | 135  | 104.1 | 102.4 | 101.4 | 97.3  | 99.1  | 95.8  |
| Q6WKZ8 | <i>Ubr2</i>     | E3 ubiquitin-     | High   | 1  | 2  | 2   | 2  | 1755 | 199   | 6.33  | 33   | 103.9 | 101.6 | 96.6  | 98.2  | 100.3 | 99.4  |
| P47941 | <i>Crkl</i>     | Crk-like protein  | High   | 48 | 11 | 16  | 11 | 303  | 33.8  | 6.74  | 207  | 100.6 | 99.5  | 101.2 | 98.2  | 96.8  | 103.7 |
| Q61423 | <i>Kcna4</i>    | Potassium         | High   | 3  | 2  | 2   | 1  | 654  | 73.4  | 5.29  | 32   | 93    | 99.3  | 84.6  | 111   | 113   | 99.2  |
| Q02819 | <i>Nucb1</i>    | Nucleobindin-1    | High   | 29 | 12 | 15  | 12 | 459  | 53.4  | 5.07  | 238  | 98.5  | 100.7 | 99.7  | 98.8  | 98.9  | 103.4 |
| Q99KL7 | <i>Rab28</i>    | Ras-related       | High   | 8  | 1  | 1   | 1  | 221  | 24.7  | 5.67  | 0    | 96    | 98.3  | 82.9  | 101.3 | 111.9 | 109.5 |
| Q99PH1 | <i>Lrrc4</i>    | Leucine-rich      | High   | 4  | 2  | 2   | 1  | 652  | 72.6  | 7.01  | 33   |       |       |       |       |       |       |
| A2AGT5 | <i>Ckap5</i>    | Cytoskeleton-     | High   | 26 | 44 | 61  | 44 | 2032 | 225.5 | 7.96  | 843  | 100.5 | 100.8 | 101.3 | 97.6  | 100   | 99.8  |
| Q812A2 | <i>Srgap3</i>   | SLIT-ROBO Rho     | High   | 28 | 26 | 34  | 26 | 1099 | 124.3 | 6.67  | 456  | 100.2 | 101.6 | 100.1 | 100.2 | 98.5  | 99.3  |
| Q9QY14 | <i>Dnajb12</i>  | DnaJ homolog      | High   | 3  | 1  | 1   | 1  | 376  | 42    | 8.51  | 47   | 91.1  | 95.5  | 103.8 | 104.6 | 102.2 | 102.7 |
| P63325 | <i>Rps10</i>    | 40S ribosomal     | High   | 35 | 6  | 14  | 6  | 165  | 18.9  | 10.15 | 173  | 99.7  | 104.2 | 102.4 | 98.9  | 97.7  | 97.1  |
| Q9WUA6 | <i>Akt3</i>     | RAC-gamma         | High   | 17 | 8  | 12  | 4  | 479  | 55.7  | 6.02  | 138  | 97.4  | 95.6  | 92.1  | 104.4 | 106.3 | 104.2 |
| Q9Z2E1 | <i>Mbd2</i>     | Methyl-CpG-       | High   | 7  | 2  | 2   | 2  | 414  | 43.5  | 10.04 | 36   | 106.1 | 88.6  | 95.5  | 93    | 106.5 | 110.3 |
| Q3UNU4 | <i>Erich4</i>   | Glutamate-rich    | Low    | 10 | 1  | 1   | 1  | 136  | 15.2  | 4.3   | 0    | 136   | 78    | 212.6 | 55    | 62.2  | 56.1  |
| Q9D8Y1 | <i>Tmem126a</i> | Transmembrane     | High   | 11 | 2  | 2   | 2  | 196  | 21.5  | 9.41  | 66   | 91.4  | 95.1  | 92.5  | 108.9 | 102.4 | 109.7 |
| Q9WUT3 | <i>Rps6ka2</i>  | Ribosomal         | High   | 13 | 9  | 9   | 3  | 733  | 83.1  | 8.5   | 72   | 99.1  | 96    | 86.7  | 100.1 | 99.1  | 119.1 |
| P18572 | <i>Bsg</i>      | Basigin OS=Mus    | High   | 23 | 8  | 14  | 8  | 389  | 42.4  | 5.85  | 208  | 99.8  | 97.8  | 103.4 | 102.7 | 99.7  | 96.6  |
| P46097 | <i>Syt2</i>     | Synaptotagmin-2   | High   | 28 | 12 | 37  | 5  | 422  | 47.2  | 7.99  | 590  | 98    | 104.1 | 91.8  | 107.6 | 100   | 98.4  |
| P61965 | <i>Wdr5</i>     | WD repeat-        | High   | 10 | 3  | 4   | 3  | 334  | 36.6  | 8.27  | 70   | 94.1  | 93.7  | 107.7 | 98.1  | 108.4 | 98    |
| O08966 | <i>Slc22a1</i>  | Solute carrier    | Medium | 6  | 2  | 2   | 2  | 556  | 61.5  | 6.67  | 0    | 101.5 | 108.5 | 94.6  | 111.8 | 96.1  | 87.4  |
| Q8CHW4 | <i>Eif2b5</i>   | Translation       | High   | 10 | 5  | 5   | 5  | 717  | 80    | 5.07  | 63   | 100.9 | 95.6  | 94.3  | 99.3  | 104.5 | 105.3 |
| P62315 | <i>Snrpd1</i>   | Small nuclear     | High   | 26 | 2  | 4   | 2  | 119  | 13.3  | 11.56 | 94   | 95    | 93.2  | 98.6  | 103   | 105.8 | 104.4 |
| P62774 | <i>Mtpn</i>     | Myotrophin        | High   | 42 | 5  | 14  | 5  | 118  | 12.9  | 5.52  | 285  | 94.8  | 96.6  | 105.3 | 100.8 | 100.7 | 101.8 |
| Q922R1 |                 | UPF0183 protein   | High   | 13 | 5  | 6   | 5  | 422  | 47.4  | 7.74  | 111  | 96.5  | 101.7 | 101.6 | 101   | 98.4  | 100.7 |
| Q8BGN3 | <i>Enpp6</i>    | Glycerophospho    | High   | 23 | 7  | 12  | 7  | 440  | 50.6  | 7.31  | 184  | 89    | 105.2 | 92.5  | 101   | 101.5 | 110.8 |
| Q8C7D2 | <i>Crbn</i>     | Protein cereblon  | High   | 6  | 2  | 2   | 2  | 445  | 50.8  | 5.33  | 31   | 93    | 108.4 | 89.7  | 102.4 | 104.1 | 102.5 |
| Q9JIG4 | <i>Ppp1r3f</i>  | Protein           | High   | 4  | 2  | 2   | 2  | 799  | 84.1  | 4.7   | 41   | 93.1  | 98.1  | 77.9  | 104   | 110.2 | 116.6 |
| Q8CFA2 | <i>Amt</i>      | Aminomethyltran   | Medium | 2  | 1  | 1   | 1  | 403  | 44    | 8.7   | 22   | 94.7  | 99.2  | 97.7  | 107   | 102.4 | 99    |
| P08553 | <i>Nefm</i>     | Neurofilament     | High   | 45 | 39 | 86  | 35 | 848  | 95.9  | 4.77  | 1427 | 94    | 117   | 83.7  | 100.5 | 103.2 | 101.5 |
| Q99L88 | <i>Sntb1</i>    | Beta-1-           | Medium | 3  | 1  | 1   | 1  | 537  | 58    | 8.31  | 27   |       |       |       |       |       |       |
| Q9JLB0 | <i>Mpp6</i>     | MAGUK p55         | High   | 39 | 20 | 25  | 19 | 553  | 62.6  | 6.4   | 418  | 101.3 | 97.2  | 102.8 | 97.9  | 99.8  | 101.1 |
| P70206 | <i>Plxna1</i>   | Plexin-A1         | High   | 18 | 28 | 33  | 22 | 1894 | 211   | 6.9   | 470  | 93.8  | 94.1  | 91.5  | 105.9 | 107.6 | 107.2 |
| Q3TDD9 | <i>Ppp1r21</i>  | Protein           | High   | 26 | 16 | 20  | 16 | 780  | 88.3  | 6.9   | 375  | 93.1  | 98.5  | 94.3  | 98.2  | 106.5 | 109.4 |
| P51855 | <i>Gss</i>      | Glutathione       | High   | 25 | 9  | 11  | 9  | 474  | 52.2  | 5.8   | 244  | 96.8  | 104.2 | 95.5  | 100.6 | 100.1 | 102.8 |
| P32037 | <i>Slc2a3</i>   | Solute carrier    | High   | 16 | 8  | 14  | 8  | 493  | 53.4  | 4.98  | 332  | 94.2  | 98.4  | 92.9  | 104.6 | 106.8 | 103   |
| P52503 | <i>Ndufs6</i>   | NADH              | High   | 62 | 7  | 13  | 7  | 116  | 13    | 8.65  | 295  | 96.6  | 100.1 | 97.5  | 96.8  | 105.9 | 103.1 |
| Q80UP5 | <i>Ankrd13a</i> | Ankyrin repeat    | Medium | 2  | 1  | 1   | 1  | 588  | 67.1  | 5.08  | 26   |       |       |       |       |       |       |
| P58501 | <i>Paxbp1</i>   | PAX3- and         | Medium | 1  | 1  | 1   | 1  | 919  | 104.8 | 5.67  | 0    |       |       |       |       |       |       |
| O88307 | <i>Sorl1</i>    | Sortilin-related  | High   | 5  | 10 | 10  | 10 | 2215 | 246.9 | 5.54  | 147  | 96.6  | 101.7 | 97.3  | 104   | 95.8  | 104.5 |
| Q8K0X8 | <i>Fez1</i>     | Fasciculation     | High   | 9  | 3  | 3   | 3  | 392  | 45.2  | 4.36  | 56   | 102.3 | 101.5 | 107.9 | 96.5  | 88.1  | 103.7 |
| Q9CZG9 | <i>Pdzd11</i>   | PDZ domain-       | High   | 17 | 1  | 1   | 1  | 140  | 16.2  | 7.14  | 41   | 99    | 95.3  | 81.5  | 97.6  | 103.7 | 122.8 |
| Q8VCY8 | <i>Plppr2</i>   | Phospholipid      | High   | 18 | 3  | 4   | 3  | 343  | 36.9  | 9.5   | 46   | 92.6  | 96.2  | 111.9 | 100.6 | 95.4  | 103.3 |
| Q8BNU0 | <i>Armc6</i>    | Armadillo repeat- | High   | 18 | 7  | 9   | 7  | 468  | 50.7  | 6     | 199  | 93.8  | 100.4 | 91.8  | 101.2 | 105.1 | 107.7 |
| Q3TDK6 | <i>Rogdi</i>    | Protein rogdi     | High   | 40 | 10 | 18  | 10 | 287  | 32.1  | 8.18  | 272  | 94.2  | 99.8  | 90.1  | 108   | 104.7 | 103.3 |
| O70340 | <i>Nptx2</i>    | Neuronal          | High   | 4  | 2  | 2   | 2  | 429  | 47.1  | 5.81  | 35   | 88.5  | 96.1  | 110.1 | 100.3 | 89.8  | 115.1 |
| P61329 | <i>Fgf12</i>    | Fibroblast growth | High   | 17 | 3  | 5   | 3  | 243  | 27.4  | 9.96  | 80   | 98.3  | 107.7 | 87    | 103.4 | 105.1 | 98.5  |
| Q9DBL7 | <i>Coasy</i>    | Bifunctional      | High   | 15 | 7  | 10  | 7  | 563  | 62    | 7.11  | 173  | 101.3 | 103.1 | 94.2  | 100.5 | 100.6 | 100.4 |
| Q8VDP4 | <i>Ccar2</i>    | Cell cycle and    | High   | 29 | 20 | 26  | 20 | 922  | 102.9 | 5.25  | 370  | 96.5  | 97.2  | 96    | 100.2 | 105.1 | 105.2 |
| Q9Z2I2 | <i>Fkbp1b</i>   | Peptidyl-prolyl   | High   | 12 | 1  | 1   | 1  | 108  | 11.8  | 8.47  | 29   | 103.1 | 99.3  | 102.7 | 104.8 | 96.2  | 93.9  |

|        |                  |                  |        |    |    |     |    |      |       |       |      |       |       |       |       |       |       |
|--------|------------------|------------------|--------|----|----|-----|----|------|-------|-------|------|-------|-------|-------|-------|-------|-------|
| Q8BUE4 | <i>Aifm2</i>     | Ferroptosis      | Medium | 2  | 1  | 1   | 1  | 373  | 40.6  | 8.98  | 14   | 101.7 | 105.2 | 104   | 100.5 | 97.8  | 90.7  |
| Q3U1V6 | <i>Uevld</i>     | Ubiquitin-       | High   | 4  | 2  | 2   | 2  | 471  | 51.6  | 7.28  | 30   | 96.5  | 99.9  | 92.2  | 98.1  | 105.8 | 107.4 |
| Q64674 | <i>Srm</i>       | Spermidine       | High   | 46 | 11 | 19  | 11 | 302  | 34    | 5.5   | 279  | 100.7 | 103   | 98.5  | 97.2  | 99.4  | 101.2 |
| Q62376 | <i>Snrnp70</i>   | U1 small nuclear | High   | 18 | 11 | 12  | 11 | 448  | 52    | 9.94  | 134  | 101.3 | 99.1  | 100.1 | 100.1 | 99.5  | 99.9  |
| F8VPU2 | <i>Farp1</i>     | FERM, ARHGEF     | High   | 17 | 15 | 19  | 15 | 1048 | 118.8 | 7.88  | 270  | 107.9 | 95.7  | 109.8 | 94.6  | 96.3  | 95.7  |
| P21956 | <i>Mfge8</i>     | Lactadherin      | High   | 3  | 1  | 1   | 1  | 463  | 51.2  | 6.52  | 23   | 103.8 | 100.5 | 96.7  | 95.4  | 107.7 | 95.8  |
| Q69ZF3 | <i>Gba2</i>      | Non-lysosomal    | High   | 5  | 4  | 5   | 4  | 918  | 103.2 | 5.59  | 104  | 97.8  | 103.7 | 95.7  | 102.9 | 100   | 99.9  |
| Q9D020 | <i>Nt5c3a</i>    | Cytosolic 5'-    | High   | 32 | 9  | 12  | 9  | 331  | 37.2  | 6.65  | 139  | 99.8  | 107.3 | 93.5  | 100.4 | 100   | 99.1  |
| P62317 | <i>Snrpd2</i>    | Small nuclear    | High   | 45 | 6  | 8   | 6  | 118  | 13.5  | 9.91  | 157  | 96.7  | 98.4  | 98.8  | 101   | 102.8 | 102.3 |
| P35505 | <i>Fah</i>       | Fumarylacetoac   | High   | 23 | 8  | 8   | 8  | 419  | 46.1  | 7.18  | 159  | 98.4  | 104.6 | 99.1  | 93.8  | 106.1 | 98    |
| P62301 | <i>Rps13</i>     | 40S ribosomal    | High   | 26 | 4  | 9   | 4  | 151  | 17.2  | 10.54 | 191  | 104.5 | 101   | 106.5 | 96.2  | 95    | 96.8  |
| Q9QY76 | <i>Vapb</i>      | Vesicle-         | High   | 44 | 10 | 20  | 9  | 243  | 26.9  | 7.78  | 369  | 98.7  | 101.5 | 94.9  | 104.1 | 102.6 | 98.2  |
| Q99J39 | <i>Mlycd</i>     | Malonyl-CoA      | High   | 12 | 4  | 4   | 4  | 492  | 54.7  | 8.94  | 47   | 94.3  | 94.7  | 100.3 | 104.2 | 106.3 | 100.1 |
| Q8CHT1 | <i>Ngef</i>      | Ephexin-1        | High   | 32 | 18 | 23  | 18 | 710  | 82.1  | 5.99  | 430  | 89.5  | 101.5 | 80.1  | 111.6 | 109.6 | 107.8 |
| A2AP18 | <i>Plch2</i>     | 1-               | High   | 5  | 6  | 6   | 5  | 1501 | 164.2 | 7.49  | 91   | 97.4  | 94.7  | 97.7  | 105.7 | 102.9 | 101.6 |
| Q80YR9 | <i>Rbm12b1</i>   | RNA-binding      | High   | 1  | 1  | 1   | 1  | 836  | 96.5  | 8.07  | 36   | 96.4  | 100.6 | 98.8  | 98.4  | 102.1 | 103.6 |
| Q8R0A6 | <i>Vstm2a</i>    | V-set and        | Medium | 4  | 1  | 1   | 1  | 236  | 25.9  | 8.27  | 23   | 111   | 95    | 108.1 | 94.7  | 94.3  | 96.8  |
| F6ZDS4 | <i>Tpr</i>       | Nucleoprotein    | High   | 13 | 30 | 32  | 30 | 2431 | 273.8 | 5.03  | 344  | 101.4 | 98.2  | 102   | 96.5  | 101   | 101   |
| P97447 | <i>Fhl1</i>      | Four and a half  | High   | 26 | 6  | 7   | 6  | 280  | 31.9  | 8.37  | 172  | 99    | 100.5 | 103.7 | 98.8  | 97.9  | 100.1 |
| Q60932 | <i>Vdac1</i>     | Voltage-         | High   | 79 | 19 | 133 | 18 | 296  | 32.3  | 8.43  | 2506 | 96.2  | 102.2 | 89.8  | 102.3 | 106.2 | 103.3 |
| O08747 | <i>Unc5c</i>     | Netrin receptor  | High   | 2  | 1  | 1   | 1  | 931  | 103   | 6.01  | 51   | 97.5  | 93.6  | 89.4  | 102.3 | 104.2 | 113   |
| E9Q3L2 | <i>Pi4ka</i>     | Phosphatidylinos | High   | 24 | 40 | 53  | 40 | 2105 | 236.9 | 7.06  | 1072 | 100   | 103.2 | 98.8  | 102.6 | 97.8  | 97.7  |
| O70318 | <i>Epb41l2</i>   | Band 4.1-like    | High   | 35 | 28 | 49  | 23 | 988  | 109.9 | 5.43  | 673  | 103   | 106   | 102.6 | 94.7  | 97.5  | 96.1  |
| Q505D1 | <i>Ankrd28</i>   | Serine/threonine | High   | 8  | 7  | 7   | 7  | 1053 | 112.8 | 6.27  | 116  | 95.8  | 102.5 | 92.4  | 109.2 | 103.7 | 96.5  |
| Q923D2 | <i>Blvrb</i>     | Flavin reductase | High   | 38 | 6  | 7   | 6  | 206  | 22.2  | 7.01  | 141  | 96.2  | 99.7  | 102.8 | 93.9  | 98.7  | 108.8 |
| Q9DCZ4 | <i>Apoo</i>      | MICOS complex    | High   | 22 | 4  | 5   | 4  | 198  | 22.6  | 9.25  | 144  | 93    | 101   | 87.3  | 112.3 | 97    | 109.3 |
| P50427 | <i>Sts</i>       | Steryl-sulfatase | High   | 5  | 2  | 2   | 2  | 624  | 66.5  | 8.5   | 0    |       |       |       |       |       |       |
| Q8CI78 | <i>Rmnd1</i>     | Required for     | High   | 13 | 6  | 7   | 6  | 450  | 51.8  | 7.99  | 75   | 94.7  | 98.8  | 93.2  | 104.4 | 99.6  | 109.3 |
| Q6IE26 | <i>Ephx4</i>     | Epoxide          | Low    | 2  | 1  | 1   | 1  | 359  | 41.5  | 8.27  | 20   |       |       |       |       |       |       |
| O09111 | <i>Ndufb11</i>   | NADH             | High   | 45 | 5  | 8   | 5  | 151  | 17.4  | 5.22  | 169  | 93.2  | 101.1 | 89.9  | 105.5 | 105.7 | 104.5 |
| Q6P2L7 | <i>Golm2</i>     | Protein GOLM2    | High   | 9  | 3  | 4   | 3  | 435  | 49.4  | 5.45  | 72   |       |       |       |       |       |       |
| Q9D9U4 | <i>Tex22</i>     | Testis-expressed | Low    | 10 | 1  | 1   | 1  | 189  | 21.5  | 5.06  | 0    | 88.5  | 87.4  | 90.3  | 106.4 | 100.8 | 126.5 |
| Q8C3X4 | <i>Guf1</i>      | Translation      | High   | 11 | 5  | 6   | 5  | 651  | 72.4  | 8.76  | 93   | 97.4  | 100.4 | 93.2  | 102   | 100.4 | 106.7 |
| Q62283 | <i>Tspan7</i>    | Tetraspanin-7    | High   | 13 | 3  | 5   | 3  | 249  | 27.5  | 7.2   | 127  | 86.1  | 97.1  | 88.3  | 114   | 111   | 103.5 |
| Q8R2Q4 | <i>Gfm2</i>      | Ribosome-        | Low    | 2  | 1  | 1   | 1  | 779  | 86.1  | 6.43  | 0    | 90.6  | 93.2  | 100.8 | 101.2 | 104.1 | 110.1 |
| Q9CXX9 | <i>Cuedc2</i>    | CUE domain-      | High   | 12 | 3  | 3   | 3  | 284  | 31.8  | 4.98  | 57   | 91.7  | 108   | 99.1  | 104.7 | 99.4  | 97    |
| P67871 | <i>Csnk2b</i>    | Casein kinase II | High   | 38 | 6  | 10  | 6  | 215  | 24.9  | 5.55  | 243  | 99.3  | 101.5 | 97.6  | 103.5 | 98.3  | 99.8  |
| Q5DTN8 | <i>Jakmip3</i>   | Janus kinase     | High   | 6  | 4  | 4   | 3  | 844  | 98.7  | 5.74  | 94   | 91.8  | 107.5 | 92.3  | 104.4 | 105.1 | 99    |
| P67778 | <i>Phb</i>       | Prohibitin       | High   | 56 | 15 | 37  | 15 | 272  | 29.8  | 5.76  | 732  | 94.7  | 100.4 | 89.4  | 104.3 | 106   | 105.2 |
| Q9D6J4 | <i>Necab3</i>    | N-terminal EF-   | High   | 3  | 1  | 1   | 1  | 353  | 39.9  | 5.66  | 38   | 97.1  | 100   | 93.4  | 109.1 | 103.7 | 96.7  |
| Q922L6 | <i>Nelfcd</i>    | Negative         | High   | 5  | 2  | 2   | 2  | 591  | 66.2  | 5.16  | 65   | 97    | 103.3 | 98.9  | 100.6 | 95.3  | 104.8 |
| P63037 | <i>Dnaja1</i>    | DnaJ homolog     | High   | 31 | 11 | 17  | 11 | 397  | 44.8  | 7.08  | 225  | 102.6 | 103.3 | 99.5  | 96.5  | 102.6 | 95.5  |
| Q9WUR9 | <i>Ak4</i>       | Adenylate kinase | High   | 45 | 7  | 9   | 7  | 223  | 25    | 7.53  | 115  | 100.5 | 103.1 | 98.3  | 100.2 | 101.3 | 96.6  |
| A2A432 | <i>Cul4b</i>     | Cullin-4B        | High   | 14 | 14 | 17  | 7  | 970  | 110.6 | 8.37  | 187  | 99.3  | 96.4  | 97.6  | 100.8 | 104.2 | 101.7 |
| O35681 | <i>Syt3</i>      | Synaptotagmin-3  | High   | 10 | 5  | 5   | 5  | 587  | 63.2  | 6.65  | 58   | 93.6  | 99.7  | 92.2  | 104.1 | 106.8 | 103.6 |
| Q9QXX4 | <i>Slc25a13</i>  | Calcium-binding  | High   | 9  | 6  | 14  | 1  | 676  | 74.4  | 8.6   | 172  | 110.7 | 105.3 | 113.2 | 91.8  | 89.2  | 89.8  |
| E9Q819 | <i>Fry</i>       | Protein furry    | High   | 6  | 14 | 16  | 14 | 3020 | 338.9 | 6.01  | 197  | 100.3 | 101   | 95.3  | 102.7 | 97.9  | 102.8 |
| P17809 | <i>Slc2a1</i>    | Solute carrier   | High   | 10 | 5  | 5   | 5  | 492  | 53.9  | 8.87  | 68   | 97.2  | 101.5 | 93.2  | 100.5 | 102.6 | 105   |
| Q9CW07 | <i>Ppp1r3g</i>   | Protein          | High   | 8  | 2  | 2   | 2  | 347  | 37.8  | 5     | 26   | 82.8  | 86.5  | 84.5  | 107.7 | 123.5 | 115   |
| Q9D892 | <i>Itpa</i>      | Inosine          | High   | 84 | 10 | 20  | 10 | 198  | 21.9  | 5.87  | 279  | 97    | 99.9  | 95.3  | 102.3 | 103.6 | 101.9 |
| Q61543 | <i>Glg1</i>      | Golgi apparatus  | High   | 17 | 17 | 17  | 17 | 1175 | 133.6 | 6.84  | 169  | 102.3 | 102.1 | 101.6 | 101.5 | 92.3  | 100.1 |
| Q8R395 | <i>Commf5</i>    | COMM domain-     | Medium | 3  | 1  | 1   | 1  | 224  | 24.5  | 8.06  | 20   |       |       |       |       |       |       |
| Q3UMR0 | <i>Ankrd27</i>   | Ankyrin repeat   | Low    | 1  | 1  | 1   | 1  | 1048 | 116.7 | 6.65  | 0    |       |       |       |       |       |       |
| Q9JKY5 | <i>Hip1r</i>     | Huntingtin-      | High   | 23 | 23 | 27  | 22 | 1068 | 119.4 | 6.52  | 356  | 94.1  | 98.9  | 89.8  | 104.4 | 104.9 | 107.9 |
| Q9DOR2 | <i>Tars1</i>     | Threonine-tRNA   | High   | 23 | 15 | 19  | 15 | 722  | 83.3  | 7.36  | 320  | 98.2  | 100.4 | 95.3  | 101.8 | 100.6 | 103.7 |
| Q8K003 | <i>Tma7</i>      | Translation      | High   | 14 | 1  | 1   | 1  | 64   | 7.1   | 9.99  | 31   | 93.2  | 93.4  | 97.4  | 105.7 | 92.4  | 117.9 |
| Q91V41 | <i>Rab14</i>     | Ras-related      | High   | 87 | 15 | 36  | 14 | 215  | 23.9  | 6.21  | 616  | 99.3  | 96.8  | 98.8  | 99.5  | 104.4 | 101.2 |
| Q9WVL0 | <i>Gstz1</i>     | Maleylacetoacet  | High   | 39 | 6  | 9   | 6  | 216  | 24.3  | 7.85  | 161  | 100   | 106.5 | 89.3  | 103.1 | 102.8 | 98.3  |
| P60521 | <i>Gabarapl2</i> | Gamma-           | High   | 45 | 7  | 12  | 7  | 117  | 13.7  | 8.1   | 167  | 98.8  | 101.1 | 93.6  | 100.9 | 104.4 | 101.2 |
| O88704 | <i>Hcn1</i>      | Potassium/sodiu  | High   | 14 | 10 | 12  | 6  | 910  | 102.4 | 8.37  | 176  | 98    | 102   | 89.3  | 106.2 | 99.2  | 105.3 |
| P62918 | <i>Rpl8</i>      | 60S ribosomal    | High   | 45 | 9  | 11  | 9  | 257  | 28    | 11.03 | 131  | 109.9 | 87.9  | 122.8 | 84    | 85.1  | 110.4 |
| Q8C419 | <i>Gpr158</i>    | Probable G-      | High   | 18 | 17 | 23  | 17 | 1200 | 134.3 | 8.09  | 324  | 94.1  | 101.1 | 85.2  | 106.5 | 106.6 | 106.5 |
| Q4VAE3 | <i>Tmem65</i>    | Transmembrane    | High   | 23 | 5  | 12  | 5  | 234  | 24.9  | 7.78  | 185  | 95.5  | 108   | 85.4  | 110.6 | 101.8 | 98.7  |
| Q99J83 | <i>Atg5</i>      | Autophagy        | High   | 9  | 2  | 2   | 2  | 275  | 32.4  | 5.91  | 34   | 93.8  | 106.1 | 95.9  | 98.9  | 106.5 | 98.7  |
| P49312 | <i>Hnrnpa1</i>   | Heterogeneous    | High   | 34 | 11 | 20  | 7  | 320  | 34.2  | 9.23  | 396  | 101.6 | 96.2  | 101.4 | 99.7  | 103.6 | 97.4  |
| Q04736 | <i>Yes1</i>      | Tyrosine-protein | High   | 18 | 9  | 11  | 4  | 541  | 60.6  | 6.64  | 91   | 98.4  | 98.1  | 91.6  | 106.5 | 98.4  | 107   |
| Q8CGK3 | <i>Lonp1</i>     | Lon protease     | High   | 20 | 16 | 24  | 16 | 949  | 105.8 | 6.57  | 351  | 96.4  | 100.3 | 90.7  | 103.2 | 102.7 | 106.7 |
| O88792 | <i>F11r</i>      | Junctional       | High   | 4  | 1  | 2   | 1  | 300  | 32.4  | 6.77  | 32   | 106.2 | 111.1 | 123.4 | 83.5  | 88.1  | 87.6  |

|        |                  |                   |        |    |    |    |    |      |       |       |      |       |       |       |       |       |       |
|--------|------------------|-------------------|--------|----|----|----|----|------|-------|-------|------|-------|-------|-------|-------|-------|-------|
| A2ARS0 | <i>Ankrd63</i>   | Ankyrin repeat    | High   | 6  | 2  | 2  | 2  | 390  | 41    | 10.83 | 47   | 83.9  | 90.6  | 89.9  | 99.1  | 118.6 | 117.8 |
| Q3TFD2 | <i>Lpcat1</i>    | Lysophosphatidy   | High   | 9  | 4  | 4  | 4  | 534  | 59.7  | 6.34  | 30   | 108.4 | 96.3  | 104.3 | 93.4  | 97.6  | 99.9  |
| P62242 | <i>Rps8</i>      | 40S ribosomal     | High   | 51 | 9  | 16 | 9  | 208  | 24.2  | 10.32 | 347  | 99.2  | 96.4  | 98.2  | 104.7 | 103.3 | 98.3  |
| Q8C0Z1 | <i>Fam234a</i>   | Protein           | High   | 3  | 2  | 2  | 2  | 555  | 60.5  | 5.68  | 17   |       |       |       |       |       |       |
| O88544 | <i>Cops4</i>     | COP9              | High   | 55 | 17 | 27 | 17 | 406  | 46.3  | 5.83  | 595  | 99.1  | 101.9 | 96.6  | 98.7  | 101.4 | 102.4 |
| Q922E6 | <i>Fastkd2</i>   | FAST kinase       | High   | 5  | 2  | 2  | 2  | 689  | 78.9  | 8.9   | 53   | 92.7  | 94.1  | 98.8  | 104.4 | 105.2 | 104.7 |
| Q9CXF4 | <i>Tbc1d15</i>   | TBC1 domain       | High   | 5  | 3  | 3  | 3  | 671  | 76.5  | 5.3   | 33   | 102.3 | 96.9  | 101.9 | 96.9  | 100.2 | 101.8 |
| Q61187 | <i>Tsg101</i>    | Tumor             | High   | 27 | 8  | 10 | 8  | 391  | 44.1  | 6.71  | 245  | 95.1  | 100.7 | 93.7  | 104   | 103.5 | 103   |
| P62069 | <i>Usp46</i>     | Ubiquitin         | High   | 18 | 6  | 9  | 6  | 366  | 42.4  | 6.83  | 178  | 111.6 | 92.6  | 114.8 | 94    | 92.9  | 94.1  |
| Q8BX57 | <i>Pxk</i>       | PX domain-        | High   | 2  | 1  | 1  | 1  | 582  | 65.2  | 9.38  | 31   | 112.6 | 92    | 108.6 | 96    | 94.1  | 96.7  |
| Q9QYX7 | <i>Pclo</i>      | Protein piccolo   | High   | 19 | 78 | 99 | 76 | 5068 | 550.5 | 6.51  | 1399 | 95.1  | 100.7 | 88.7  | 107.5 | 104.8 | 103.1 |
| Q8C996 | <i>Tmem163</i>   | Transmembrane     | High   | 9  | 2  | 3  | 2  | 288  | 31.2  | 7.93  | 48   | 95.6  | 93.9  | 88.1  | 110.9 | 105.9 | 105.6 |
| Q9CQW1 | <i>Ykt6</i>      | Synaptobrevin     | High   | 54 | 10 | 13 | 10 | 198  | 22.3  | 6.35  | 195  | 98.2  | 100.4 | 92.7  | 101.9 | 103.8 | 103   |
| Q8R0J8 | <i>Idnk</i>      | Probable          | High   | 17 | 2  | 2  | 2  | 184  | 20    | 6.33  | 27   | 86.5  | 98.6  | 92.8  | 106.3 | 109.5 | 106.2 |
| Q8R5H1 | <i>Usp15</i>     | Ubiquitin         | High   | 17 | 14 | 17 | 14 | 981  | 112.3 | 5.17  | 149  | 100.6 | 99.6  | 96.9  | 101.7 | 98.4  | 102.8 |
| O55137 | <i>Acot1</i>     | Acyl-coenzyme     | High   | 18 | 7  | 10 | 1  | 419  | 46.1  | 6.58  | 200  | 104.6 | 108.7 | 110.5 | 86.3  | 90.5  | 99.3  |
| G3XA57 | <i>Rab11fip2</i> | Rab11 family-     | High   | 16 | 6  | 7  | 6  | 512  | 58.2  | 9.45  | 133  | 93.9  | 90.3  | 92.8  | 106.8 | 103.2 | 113   |
| Q9CWN7 | <i>Cnot11</i>    | CCR4-NOT          | Medium | 5  | 1  | 1  | 1  | 505  | 54.9  | 6.55  | 0    | 98.5  | 90.9  | 114.1 | 101.6 | 114   | 80.8  |
| Q9CWZ3 | <i>Rbm8a</i>     | RNA-binding       | High   | 11 | 2  | 2  | 2  | 174  | 19.9  | 5.72  | 48   | 97    | 98.1  | 103   | 101.8 | 102   | 98.1  |
| Q9JLV1 | <i>Bag3</i>      | BAG family        | High   | 2  | 1  | 1  | 1  | 577  | 61.8  | 7.27  | 45   | 111.6 | 99.9  | 126.6 | 85    | 97.2  | 79.7  |
| Q60864 | <i>Stip1</i>     | Stress-induced-   | High   | 50 | 31 | 48 | 31 | 543  | 62.5  | 6.8   | 665  | 101.1 | 103.8 | 99.3  | 99.4  | 98.9  | 97.4  |
| Q9JK48 | <i>Sh3glb1</i>   | Endophilin-B1     | High   | 30 | 12 | 15 | 11 | 365  | 40.8  | 6.04  | 248  | 97.3  | 100.5 | 103.4 | 98.1  | 98.9  | 101.8 |
| Q9D8V0 | <i>Hm13</i>      | Minor             | High   | 6  | 2  | 3  | 2  | 378  | 41.7  | 6.04  | 63   | 98.5  | 101.4 | 116.9 | 89.6  | 98.1  | 95.5  |
| O35286 | <i>Dhx15</i>     | Pre-mRNA-         | High   | 20 | 14 | 21 | 14 | 795  | 90.9  | 7.46  | 257  | 100   | 98.8  | 98.6  | 101.9 | 98    | 102.7 |
| Q9JHU2 | <i>Palmd</i>     | Palmdelphin       | High   | 10 | 4  | 6  | 4  | 551  | 62.7  | 5.66  | 77   | 95.5  | 101.8 | 89.6  | 103.9 | 101.6 | 107.5 |
| Q99MP8 | <i>Brap</i>      | BRCA1-            | Low    | 2  | 1  | 1  | 1  | 591  | 66.9  | 5.64  | 0    |       |       |       |       |       |       |
| Q9CR98 | <i>Fam136a</i>   | Protein           | High   | 25 | 4  | 7  | 4  | 138  | 15.7  | 7.61  | 149  | 98    | 100.9 | 95.9  | 99.2  | 104.2 | 101.7 |
| O35393 | <i>Efnb3</i>     | Ephrin-B3         | High   | 8  | 2  | 2  | 2  | 340  | 35.9  | 8.25  | 29   | 96    | 94.8  | 96.9  | 96.3  | 101.2 | 114.7 |
| Q8BTI8 | <i>Srrm2</i>     | Serine/arginine   | High   | 4  | 8  | 9  | 8  | 2703 | 294.7 | 12.03 | 87   | 102.8 | 90.4  | 113   | 97    | 98.9  | 97.8  |
| Q8BGY7 | <i>Fam210a</i>   | Protein           | High   | 4  | 1  | 1  | 1  | 273  | 31.6  | 9.82  | 16   | 98.3  | 100.1 | 88.4  | 110.8 | 99.3  | 103.1 |
| Q8C031 | <i>Lrrc4c</i>    | Leucine-rich      | High   | 6  | 5  | 7  | 3  | 640  | 71.9  | 7.15  | 85   | 93.3  | 98.8  | 91.3  | 107   | 106.2 | 103.4 |
| Q8BYY4 | <i>Ttc39b</i>    | Tetratricopeptide | High   | 5  | 2  | 2  | 2  | 617  | 70.2  | 6.64  | 44   | 93.2  | 98.9  | 94.4  | 105.5 | 103.2 | 104.9 |
| P84091 | <i>Ap2m1</i>     | AP-2 complex      | High   | 52 | 22 | 62 | 22 | 435  | 49.6  | 9.54  | 1189 | 98.1  | 102.1 | 92.2  | 106   | 100.6 | 101.1 |
| Q6V4S5 | <i>Sdk2</i>      | Protein sidekick- | High   | 3  | 4  | 4  | 4  | 2176 | 239.8 | 7.36  | 74   | 84.8  | 96    | 94.6  | 101.4 | 106.9 | 116.3 |
| Q63850 | <i>Nup62</i>     | Nuclear pore      | High   | 7  | 3  | 3  | 3  | 526  | 53.2  | 5.31  | 53   | 97.9  | 100.7 | 92.4  | 102.3 | 101.2 | 105.5 |
| Q8CGI1 | <i>Fam193a</i>   | Protein           | Low    | 1  | 1  | 1  | 1  | 1231 | 136.6 | 6.47  | 0    |       |       |       |       |       |       |
| P12246 | <i>Apcs</i>      | Serum amyloid     | High   | 19 | 3  | 4  | 3  | 224  | 26.2  | 6.35  | 127  | 153.6 | 118.3 | 107.9 | 71.4  | 73.7  | 75    |
| P83093 | <i>Stim2</i>     | Stromal           | High   | 9  | 5  | 5  | 5  | 746  | 83.9  | 6.79  | 80   | 96.1  | 99.3  | 97.2  | 101.5 | 104.9 | 101.1 |
| P27612 | <i>Plaa</i>      | Phospholipase     | High   | 28 | 17 | 21 | 17 | 794  | 87.2  | 6.14  | 370  | 96    | 100.4 | 97.1  | 100.8 | 102   | 103.7 |
| Q00PI9 | <i>Hnrnpul2</i>  | Heterogeneous     | High   | 39 | 26 | 42 | 26 | 745  | 84.9  | 4.89  | 592  | 99.9  | 95.7  | 97.5  | 102.6 | 102.4 | 101.8 |
| P30275 | <i>Ckmt1</i>     | Creatine kinase   | High   | 56 | 18 | 82 | 18 | 418  | 47    | 8.16  | 1481 | 98.1  | 104.5 | 96.9  | 102.8 | 99.2  | 98.4  |
| Q9EPU5 | <i>Tnfrsf21</i>  | Tumor necrosis    | High   | 4  | 2  | 2  | 2  | 655  | 71.9  | 7.46  | 23   | 97.1  | 94.8  | 96.4  | 100.6 | 103.1 | 108   |
| O88844 | <i>Idh1</i>      | Isocitrate        | High   | 58 | 24 | 41 | 24 | 414  | 46.6  | 7.17  | 604  | 96.7  | 99.7  | 100.3 | 99    | 101.7 | 102.6 |
| P20352 | <i>F3</i>        | Tissue factor     | High   | 6  | 1  | 2  | 1  | 294  | 32.9  | 9.32  | 54   | 106.3 | 93.3  | 101.1 | 92.6  | 100.6 | 106.1 |
| P32883 | <i>Kras</i>      | GTPase KRas       | High   | 55 | 7  | 18 | 2  | 189  | 21.6  | 6.77  | 373  | 105.1 | 98.5  | 94.8  | 101.3 | 99.4  | 100.9 |
| P63005 | <i>Pafah1b1</i>  | Platelet-         | High   | 54 | 19 | 33 | 18 | 410  | 46.6  | 7.37  | 297  | 100.2 | 102   | 96.1  | 100.8 | 100.6 | 100.5 |
| Q62241 | <i>Snrpc</i>     | U1 small nuclear  | High   | 13 | 2  | 3  | 2  | 159  | 17.4  | 9.67  | 105  | 101.8 | 100.8 | 102.9 | 97.8  | 98.3  | 98.5  |
| Q8K221 | <i>Arfp2</i>     | Arfaptin-2        | High   | 14 | 4  | 4  | 4  | 341  | 37.7  | 5.87  | 81   | 94.2  | 100.4 | 94.7  | 105.1 | 99.3  | 106.3 |
| Q8K3R3 | <i>Plcd4</i>     | 1-                | Medium | 3  | 1  | 1  | 1  | 807  | 92.6  | 5.12  | 0    |       |       |       |       |       |       |
| Q9JM13 | <i>Rabgef1</i>   | Rab5 GDP/GTP      | High   | 14 | 6  | 8  | 6  | 491  | 56.8  | 6.79  | 82   | 97.6  | 103.3 | 97.8  | 101.3 | 99.4  | 100.6 |
| Q8BN59 | <i>Larp6</i>     | La-related        | High   | 2  | 1  | 1  | 1  | 492  | 54.8  | 7.9   | 33   | 95.6  | 101.3 | 82.8  | 104.2 | 107.7 | 108.3 |
| P10126 | <i>Eef1a1</i>    | Elongation factor | High   | 48 | 17 | 67 | 9  | 462  | 50.1  | 9.01  | 1167 | 108.2 | 100.1 | 116.1 | 90    | 92    | 93.7  |
| Q7TT50 | <i>Cdc42bpb</i>  | Serine/threonine  | High   | 15 | 25 | 29 | 22 | 1713 | 194.6 | 6.46  | 345  | 99.9  | 97    | 100   | 99.1  | 103.2 | 100.7 |
| Q02956 | <i>Prkc</i>      | Protein kinase C  | High   | 2  | 1  | 2  | 1  | 592  | 67.6  | 5.76  | 30   | 91.4  | 97.3  | 97.9  | 110   | 102.7 | 100.7 |
| P17095 | <i>Hmga1</i>     | High mobility     | High   | 23 | 2  | 3  | 2  | 107  | 11.6  | 10.32 | 33   | 100   | 92.8  | 96.3  | 105.3 | 105   | 100.7 |
| P12961 | <i>Scg5</i>      | Neuroendocrine    | High   | 22 | 3  | 4  | 3  | 212  | 23.9  | 5.81  | 46   | 95    | 99.4  | 98    | 96.8  | 100.5 | 110.2 |
| Q9Z2B9 | <i>Rps6ka4</i>   | Ribosomal         | Low    | 1  | 1  | 1  | 1  | 773  | 85.6  | 8.27  | 18   |       |       |       |       |       |       |
| Q99LG4 | <i>Ttc5</i>      | Tetratricopeptide | High   | 9  | 3  | 3  | 3  | 440  | 48.8  | 6.29  | 49   | 102.4 | 95.9  | 103.8 | 95.8  | 98.2  | 103.8 |
| O08919 | <i>Numb1</i>     | Numb-like         | High   | 19 | 11 | 13 | 8  | 604  | 64.1  | 8.82  | 164  | 95.8  | 97.3  | 96.2  | 104   | 102.3 | 104.4 |
| Q8K4R4 | <i>Pitpnc1</i>   | Cytoplasmic       | High   | 34 | 10 | 14 | 10 | 332  | 38.4  | 6.32  | 127  | 91.4  | 101.8 | 81.2  | 112.4 | 109.2 | 104.1 |
| Q9JIG7 | <i>Ccdc22</i>    | Coiled-coil       | High   | 18 | 9  | 10 | 9  | 627  | 70.8  | 6.01  | 170  | 102.9 | 98.8  | 95.8  | 97.8  | 102   | 102.6 |
| Q6PDN3 | <i>Mylk</i>      | Myosin light      | Medium | 0  | 1  | 1  | 1  | 1941 | 212.8 | 6.25  | 18   | 99.1  | 106   | 106.7 | 86.1  | 98.6  | 103.4 |
| Q9D8B4 | <i>Ndufa11</i>   | NADH              | High   | 24 | 2  | 4  | 2  | 141  | 15    | 8.35  | 94   | 98.6  | 103.8 | 98    | 104.2 | 100.6 | 94.7  |
| Q8CA71 | <i>Shisa4</i>    | Protein shisa-4   | High   | 5  | 1  | 1  | 1  | 197  | 21.5  | 7.42  | 27   | 85.4  | 99.4  | 84.4  | 94.1  | 98.3  | 138.5 |
| P63213 | <i>Gng2</i>      | Guanine           | High   | 62 | 4  | 20 | 4  | 71   | 7.8   | 7.99  | 418  | 99.9  | 100.1 | 92.5  | 103.3 | 103.7 | 100.5 |
| Q8N9S3 | <i>Ahsa2</i>     | Activator of 90   | High   | 7  | 2  | 2  | 2  | 331  | 37.6  | 6.44  | 22   |       |       |       |       |       |       |
| Q8BYI9 | <i>Tnr</i>       | Tenascin-R        | High   | 31 | 32 | 73 | 32 | 1358 | 149.5 | 4.94  | 1641 | 91.4  | 107.1 | 83.9  | 105.7 | 107.1 | 104.8 |
| P01878 |                  | Ig alpha chain C  | High   | 4  | 1  | 1  | 1  | 344  | 36.9  | 5.06  | 61   | 166.4 | 101.2 | 177.9 | 52.4  | 54    | 47.9  |

|        |                 |                   |        |    |    |     |    |      |       |       |      |       |       |       |       |       |       |
|--------|-----------------|-------------------|--------|----|----|-----|----|------|-------|-------|------|-------|-------|-------|-------|-------|-------|
| Q5SW75 | <i>Ssh2</i>     | Protein           | Medium | 1  | 1  | 1   | 1  | 1423 | 158.1 | 5.67  | 21   | 112   | 89.9  | 83.7  | 91.8  | 108.6 | 114   |
| P00848 | <i>Mtstp6</i>   | ATP synthase      | Medium | 4  | 1  | 2   | 1  | 226  | 25.1  | 10.43 | 24   | 100.8 | 102   | 96.8  | 99.7  | 94.3  | 106.4 |
| Q923Z0 | <i>Gprc5b</i>   | G-protein         | High   | 3  | 1  | 1   | 1  | 410  | 45.9  | 8.38  | 48   | 101.3 | 99.1  | 100.8 | 98.4  | 95    | 105.4 |
| Q9Z2L6 | <i>Minpp1</i>   | Multiple inositol | High   | 9  | 3  | 3   | 3  | 481  | 54.5  | 7.49  | 29   | 110.4 | 102.9 | 91.1  | 97.5  | 96    | 102.1 |
| P50543 | <i>S100a11</i>  | Protein S100-     | High   | 16 | 1  | 1   | 1  | 98   | 11.1  | 5.45  | 52   | 133.8 | 117   | 209.5 | 44.9  | 44.8  | 50.1  |
| Q8CGC4 | <i>Lsm14b</i>   | Protein LSM14     | High   | 11 | 3  | 3   | 3  | 385  | 42.3  | 9.63  | 44   | 103.4 | 105.8 | 82    | 105.7 | 102.7 | 100.3 |
| Q6PD24 | <i>Ankrd13d</i> | Ankyrin repeat    | High   | 4  | 2  | 2   | 2  | 605  | 68    | 5.47  | 55   | 94.5  | 97.6  | 89.3  | 98.9  | 112.1 | 107.6 |
| Q9D7P6 | <i>Iscu</i>     | Iron-sulfur       | High   | 47 | 8  | 8   | 8  | 168  | 18.1  | 9.29  | 89   | 97.5  | 100.9 | 88.9  | 105.6 | 104.3 | 102.8 |
| Q3TAS6 | <i>Emc10</i>    | ER membrane       | High   | 10 | 2  | 3   | 2  | 258  | 27    | 5.91  | 57   | 80.2  | 116.4 | 99.4  | 108.7 | 99.8  | 95.6  |
| Q64471 | <i>Gstt1</i>    | Glutathione S-    | High   | 10 | 2  | 2   | 2  | 240  | 27.4  | 7.27  | 24   | 106.1 | 100.2 | 112.7 | 95.7  | 91.1  | 94.2  |
| A2AHG0 | <i>Lzts3</i>    | Leucine zipper    | High   | 6  | 4  | 4   | 4  | 700  | 74.9  | 6.99  | 22   | 95    | 98.8  | 88.2  | 102.4 | 104.6 | 111   |
| O88958 | <i>Gnpda1</i>   | Glucosamine-6-    | High   | 26 | 7  | 9   | 5  | 289  | 32.5  | 6.6   | 206  | 103.2 | 102.6 | 103   | 93.3  | 98.5  | 99.5  |
| P51432 | <i>Plcb3</i>    | 1-                | High   | 3  | 3  | 4   | 3  | 1234 | 139.4 | 5.94  | 101  | 115.1 | 104.1 | 107.7 | 95    | 86.8  | 91.3  |
| Q6VNB8 | <i>Wdfy3</i>    | WD repeat and     | High   | 8  | 21 | 23  | 21 | 3508 | 392.1 | 6.8   | 319  | 96.8  | 96.1  | 99.1  | 98.2  | 103.4 | 106.3 |
| P62305 | <i>Snrpe</i>    | Small nuclear     | Low    | 12 | 1  | 1   | 1  | 92   | 10.8  | 9.44  | 0    | 101.8 | 106.3 | 94.9  | 93.6  | 97.5  | 105.9 |
| Q3THG9 | <i>Aarsd1</i>   | Alanyl-tRNA       | High   | 10 | 3  | 3   | 3  | 412  | 44.9  | 6.42  | 53   | 108.8 | 100.1 | 95.8  | 98.1  | 96.6  | 100.7 |
| P46664 | <i>Adss2</i>    | Adenylosuccinat   | High   | 21 | 8  | 10  | 7  | 456  | 50    | 6.38  | 226  | 97.7  | 104.2 | 95.7  | 105.5 | 95.8  | 101.1 |
| Q32NY4 | <i>Cnm3</i>     | Metal transporter | High   | 3  | 1  | 1   | 1  | 713  | 76.2  | 5.58  | 16   |       |       |       |       |       |       |
| Q9CQ40 | <i>Mrpl49</i>   | 39S ribosomal     | High   | 19 | 3  | 4   | 3  | 166  | 19.1  | 9.5   | 94   | 98.3  | 99.1  | 88.7  | 106.2 | 102.1 | 105.5 |
| Q9Z0R4 | <i>Itsn1</i>    | Intersectin-1     | High   | 16 | 25 | 31  | 20 | 1714 | 194.2 | 7.91  | 422  | 98.7  | 95.9  | 97.1  | 102.9 | 102.9 | 102.5 |
| Q5F2E8 | <i>Taok1</i>    | Serine/threonine  | High   | 12 | 12 | 15  | 10 | 1001 | 116   | 7.55  | 195  | 97.3  | 96.1  | 95.4  | 106   | 100.2 | 104.9 |
| Q6Y685 | <i>Tacc1</i>    | Transforming      | High   | 13 | 9  | 9   | 7  | 774  | 83.9  | 5.03  | 83   | 95.1  | 96.6  | 99.8  | 110.3 | 97.9  | 100.2 |
| Q9DC50 | <i>Crot</i>     | Peroxisomal       | High   | 14 | 6  | 7   | 6  | 612  | 70.2  | 6.73  | 88   | 107.7 | 106.1 | 115.6 | 88.3  | 89.4  | 93    |
| Q9QXJ1 | <i>Apbb1</i>    | Amyloid-beta A4   | High   | 10 | 5  | 8   | 5  | 710  | 77.3  | 5     | 189  | 101.4 | 99.4  | 92.7  | 97.2  | 101.6 | 107.8 |
| Q9DC16 | <i>Ergic1</i>   | Endoplasmic       | High   | 17 | 3  | 3   | 3  | 290  | 32.5  | 7.06  | 78   | 99.7  | 100   | 93.5  | 104.8 | 103.7 | 98.3  |
| Q91WV0 | <i>Dr1</i>      | Protein Dr1       | High   | 7  | 1  | 2   | 1  | 176  | 19.4  | 4.75  | 47   | 97.8  | 94.5  | 99.3  | 95.6  | 103.2 | 109.5 |
| A2ALS5 | <i>Rap1gap</i>  | Rap1 GTPase-      | High   | 27 | 14 | 17  | 14 | 663  | 73.4  | 5.87  | 252  | 94.6  | 98.2  | 93.2  | 101.5 | 102.5 | 110.1 |
| Q9WTX6 | <i>Cul1</i>     | Cullin-1 OS=Mus   | High   | 20 | 13 | 16  | 13 | 776  | 89.6  | 8     | 307  | 95.1  | 99.5  | 95.5  | 102.4 | 100.6 | 106.9 |
| Q80TS3 | <i>Adgrl3</i>   | Adhesion G        | High   | 11 | 15 | 19  | 15 | 1537 | 171   | 6.71  | 281  | 97.1  | 95.6  | 90.8  | 105.7 | 107.3 | 103.5 |
| Q9QYB5 | <i>Add3</i>     | Gamma-adducin     | High   | 28 | 16 | 27  | 16 | 706  | 78.7  | 5.95  | 488  | 100.2 | 98.6  | 102   | 100.1 | 102.3 | 96.9  |
| Q9QZA0 | <i>Ca5b</i>     | Carbonic          | Low    | 3  | 1  | 1   | 1  | 317  | 36.6  | 7.31  | 0    |       |       |       |       |       |       |
| Q08024 | <i>Cbfb</i>     | Core-binding      | High   | 9  | 1  | 1   | 1  | 187  | 22    | 5.77  | 56   | 109.2 | 109   | 91.5  | 97.1  | 97.8  | 95.4  |
| P70271 | <i>Pdlim4</i>   | PDZ and LIM       | Low    | 2  | 1  | 1   | 1  | 330  | 35.5  | 8.05  | 0    |       |       |       |       |       |       |
| P19258 | <i>Mpv17</i>    | Protein Mpv17     | High   | 6  | 1  | 1   | 1  | 176  | 19.7  | 9.44  | 19   |       |       |       |       |       |       |
| P62313 | <i>Lsm6</i>     | U6 snRNA-         | High   | 43 | 4  | 4   | 4  | 80   | 9.1   | 9.58  | 64   | 98.7  | 98.8  | 99.9  | 100.6 | 101.9 | 100.1 |
| Q924S8 | <i>Spred1</i>   | Sprouty-related,  | High   | 13 | 4  | 4   | 4  | 444  | 50.6  | 6.47  | 51   | 94.1  | 105.9 | 91.7  | 98.6  | 102.3 | 107.4 |
| Q4KWH5 | <i>Plch1</i>    | 1-                | High   | 1  | 2  | 3   | 1  | 1682 | 187.6 | 7.33  | 31   | 106   | 113.8 | 114   | 92.1  | 84.8  | 89.4  |
| Q4JK59 | <i>Tet2</i>     | Methylcytosine    | Low    | 0  | 1  | 1   | 1  | 1912 | 212   | 7.84  | 0    |       |       |       |       |       |       |
| Q2M3X8 | <i>Phactr1</i>  | Phosphatase       | High   | 20 | 10 | 12  | 10 | 580  | 66.2  | 6.96  | 154  | 91.9  | 99.7  | 85.1  | 105.3 | 106.8 | 111.3 |
| Q91VM9 | <i>Ppa2</i>     | Inorganic         | High   | 36 | 11 | 18  | 11 | 330  | 38.1  | 6.98  | 269  | 91.3  | 101.1 | 97.6  | 104.7 | 103.1 | 102.2 |
| P30678 | <i>Gna15</i>    | Guanine           | Medium | 3  | 1  | 1   | 1  | 374  | 43.5  | 7.4   | 0    | 104.4 | 96    | 88.1  | 96.8  | 115.1 | 99.8  |
| Q9WV27 | <i>Atp1a4</i>   | Sodium/potassiu   | High   | 11 | 11 | 139 | 1  | 1032 | 114.8 | 5.71  | 3862 | 96.1  | 87.5  | 128.3 | 102.4 | 91.6  | 94.1  |
| Q5DTT3 | <i>Tasor2</i>   | Protein TASOR     | Medium | 0  | 1  | 1   | 1  | 2382 | 264.1 | 6.44  | 0    | 112.1 | 98.6  | 113   | 91.9  | 91.5  | 92.7  |
| Q9CQS4 | <i>Slc25a46</i> | Solute carrier    | High   | 27 | 9  | 11  | 9  | 418  | 46.2  | 7.64  | 140  | 95.5  | 100.4 | 94.1  | 105.2 | 102.5 | 102.2 |
| Q8CCP0 | <i>Nemf</i>     | Nuclear export    | High   | 2  | 2  | 2   | 2  | 1064 | 121.1 | 6.8   | 0    | 92.1  | 96.7  | 87.5  | 95.2  | 107.2 | 121.2 |
| Q9DCD0 | <i>Pgd</i>      | 6-                | High   | 37 | 16 | 24  | 16 | 483  | 53.2  | 7.23  | 531  | 104.1 | 100.9 | 118.3 | 91.2  | 92.7  | 92.8  |
| Q924M7 | <i>Mpi</i>      | Mannose-6-        | High   | 22 | 7  | 10  | 7  | 423  | 46.5  | 5.95  | 169  | 104.6 | 103.4 | 97.4  | 97.8  | 98.6  | 98.2  |
| Q9JHE7 | <i>Tssc4</i>    | Protein TSSC4     | Medium | 3  | 1  | 1   | 1  | 317  | 33.5  | 5.14  | 16   |       |       |       |       |       |       |
| Q9D1K7 |                 | UPF0687 protein   | High   | 14 | 2  | 2   | 2  | 174  | 19.5  | 6.68  | 47   | 95.3  | 86.1  | 99.2  | 106.1 | 108.1 | 105.1 |
| Q9EQ80 | <i>Nif3l1</i>   | NIF3-like protein | High   | 11 | 4  | 5   | 4  | 376  | 41.7  | 6.76  | 57   | 95.3  | 99.6  | 95.3  | 105   | 103.8 | 101.1 |
| Q8VDU5 | <i>Snrk</i>     | SNF-related       | High   | 5  | 4  | 4   | 4  | 748  | 81.9  | 7.49  | 50   | 93.3  | 102   | 86.4  | 107.5 | 104.7 | 106.1 |
| P04186 | <i>Cfb</i>      | Complement        | High   | 9  | 7  | 9   | 7  | 761  | 85    | 7.37  | 121  | 148.5 | 80.4  | 173.1 | 62.3  | 65.7  | 69.9  |
| Q8CFN5 | <i>Mef2c</i>    | Myocyte-specific  | High   | 4  | 1  | 1   | 1  | 474  | 51.2  | 8.03  | 25   |       |       |       |       |       |       |
| Q9QZS8 | <i>Sh2d3c</i>   | SH2 domain-       | Medium | 1  | 1  | 1   | 1  | 854  | 94.3  | 7.53  | 26   |       |       |       |       |       |       |
| P51906 | <i>Slc1a1</i>   | Excitatory amino  | High   | 8  | 3  | 4   | 3  | 523  | 56.7  | 6.11  | 90   | 95.3  | 101.7 | 88.8  | 101.6 | 105.3 | 107.3 |
| Q99LJ1 | <i>Fuca1</i>    | Tissue alpha-L-   | High   | 2  | 1  | 1   | 1  | 452  | 52.2  | 6.95  | 34   | 109.1 | 98.4  | 108.4 | 93.8  | 93.5  | 96.9  |
| Q02105 | <i>C1qc</i>     | Complement        | High   | 20 | 4  | 5   | 4  | 246  | 26    | 8.54  | 106  | 131.8 | 120   | 140.6 | 67    | 68    | 72.5  |
| Q8VDK1 | <i>Nit1</i>     | Deaminated        | High   | 14 | 4  | 6   | 4  | 323  | 35.7  | 7.94  | 42   | 102   | 103.3 | 97.5  | 97.1  | 100   | 100.2 |
| Q9D1T0 | <i>Lingo1</i>   | Leucine-rich      | High   | 24 | 12 | 22  | 11 | 614  | 69.1  | 8.31  | 381  | 94    | 101.5 | 90.6  | 104.6 | 104.8 | 104.5 |
| P22907 | <i>Hmbs</i>     | Porphobilinogen   | High   | 10 | 3  | 3   | 3  | 361  | 39.3  | 6.87  | 34   | 105.5 | 100.4 | 106.1 | 92.9  | 100.9 | 94.2  |
| Q35231 | <i>Kifc3</i>    | Kinesin-like      | Medium | 1  | 1  | 1   | 1  | 824  | 92.5  | 7.71  | 0    | 104   | 88.7  | 96.4  | 106.7 | 97.7  | 106.5 |
| Q8VDC0 | <i>Lars2</i>    | Probable          | High   | 6  | 4  | 4   | 4  | 902  | 101.4 | 8.19  | 91   | 97.5  | 98.9  | 90.7  | 101.3 | 107.3 | 104.3 |
| Q8BGD9 | <i>Eif4b</i>    | Eukaryotic        | High   | 20 | 12 | 17  | 12 | 611  | 68.8  | 5.67  | 160  | 98.4  | 98.1  | 96.8  | 104.2 | 100.4 | 102.1 |
| Q8BZJ7 | <i>Dcun1d2</i>  | DCN1-like         | High   | 10 | 2  | 2   | 2  | 259  | 30    | 5.59  | 39   | 96.3  | 108.3 | 85.4  | 102.4 | 98.7  | 108.8 |
| Q99PJ0 | <i>Ntm</i>      | Neurotrimin       | High   | 31 | 8  | 30  | 8  | 344  | 38    | 7.81  | 746  | 89.2  | 97.1  | 79.1  | 114.1 | 112.4 | 108.1 |
| P97441 | <i>Slc30a3</i>  | Zinc transporter  | High   | 19 | 7  | 11  | 7  | 388  | 41.8  | 6.38  | 112  | 94.3  | 95.9  | 83.6  | 110.4 | 110.1 | 105.6 |
| P52430 | <i>Pon1</i>     | Serum             | High   | 8  | 2  | 2   | 2  | 355  | 39.5  | 5.22  | 28   | 115.8 | 87.5  | 129.3 | 87.7  | 88.6  | 91    |
| Q149L6 | <i>Dnajb14</i>  | DnaJ homolog      | High   | 8  | 3  | 3   | 3  | 379  | 42.3  | 8.59  | 76   | 86.5  | 92.5  | 99.9  | 97.6  | 106.3 | 117.4 |



|        |                |                   |        |    |    |    |    |      |       |       |     |       |       |       |       |       |       |
|--------|----------------|-------------------|--------|----|----|----|----|------|-------|-------|-----|-------|-------|-------|-------|-------|-------|
| Q9R1V6 | <i>Adam22</i>  | Disintegrin and   | High   | 18 | 13 | 21 | 13 | 904  | 99.7  | 7.83  | 406 | 100.1 | 109.4 | 87.8  | 102.3 | 101.4 | 98.9  |
| Q9JHK4 | <i>Rabgga</i>  | Geranylgeranyl    | High   | 28 | 14 | 22 | 14 | 567  | 64.9  | 5.8   | 385 | 95.1  | 99.3  | 93.2  | 103.3 | 103   | 106.1 |
| P09470 | <i>Ace</i>     | Angiotensin-      | High   | 2  | 2  | 2  | 2  | 1312 | 150.8 | 6.55  | 18  |       |       |       |       |       |       |
| Q61545 | <i>Ewsr1</i>   | RNA-binding       | High   | 4  | 2  | 5  | 2  | 655  | 68.4  | 9.33  | 72  | 99.7  | 100.2 | 103.4 | 106.8 | 97    | 92.8  |
| P97450 | <i>Atp5pf</i>  | ATP synthase-     | High   | 51 | 7  | 19 | 7  | 108  | 12.5  | 9.36  | 249 | 96.4  | 103.2 | 88.9  | 103   | 106.1 | 102.4 |
| P58158 | <i>B3gat3</i>  | Galactosylgalact  | Low    | 2  | 1  | 1  | 1  | 335  | 37    | 8.78  | 18  |       |       |       |       |       |       |
| Q9CRC8 | <i>Lrrc40</i>  | Leucine-rich      | High   | 11 | 6  | 6  | 6  | 602  | 68    | 6.89  | 94  | 100.5 | 98.3  | 105.8 | 93.2  | 101.4 | 100.8 |
| Q99JB2 | <i>Stoml2</i>  | Stomatin-like     | High   | 36 | 10 | 15 | 10 | 353  | 38.4  | 8.87  | 340 | 96.8  | 101.5 | 92.9  | 103.3 | 103.3 | 102.2 |
| P84075 | <i>Hpca</i>    | Neuron-specific   | High   | 63 | 12 | 26 | 5  | 193  | 22.4  | 4.97  | 418 | 90.7  | 102.7 | 104.8 | 102.3 | 98.9  | 100.6 |
| Q9QYK7 | <i>Rnf11</i>   | RING finger       | High   | 20 | 2  | 3  | 2  | 154  | 17.4  | 4.78  | 21  | 93.6  | 105.2 | 86    | 110.5 | 101.3 | 103.4 |
| P14901 | <i>Hmox1</i>   | Heme              | High   | 12 | 2  | 2  | 2  | 289  | 32.9  | 6.54  | 24  | 95.5  | 109   | 100.8 | 92.3  | 101.1 | 101.4 |
| Q5SUR0 | <i>Pfas</i>    | Phosphoribosylf   | High   | 5  | 6  | 6  | 6  | 1337 | 144.5 | 5.67  | 65  | 98.9  | 99.3  | 98.1  | 100.6 | 100.1 | 103   |
| P62849 | <i>Rps24</i>   | 40S ribosomal     | High   | 35 | 5  | 8  | 5  | 133  | 15.4  | 10.78 | 62  | 96.4  | 93.6  | 98.8  | 103.5 | 104.3 | 103.4 |
| Q8VCW8 | <i>Acsf2</i>   | Medium-chain      | High   | 25 | 12 | 15 | 12 | 615  | 67.9  | 8.18  | 306 | 94.9  | 96.2  | 98    | 98.5  | 105.3 | 107.1 |
| Q9Z2C9 | <i>Mtmr7</i>   | Myotubularin-     | High   | 11 | 6  | 8  | 6  | 660  | 75.6  | 6.43  | 109 | 93.4  | 96.5  | 94.2  | 107.7 | 105.1 | 103.1 |
| Q9D706 | <i>Rpap3</i>   | RNA polymerase    | High   | 3  | 2  | 3  | 2  | 660  | 74.1  | 7.99  | 27  | 97.5  | 102.6 | 100.9 | 97.2  | 98.4  | 103.4 |
| Q8VD00 | <i>Tmem97</i>  | Sigma             | Medium | 9  | 1  | 1  | 1  | 176  | 20.8  | 9.28  | 24  | 97.1  | 97.7  | 101.2 | 101   | 112.2 | 90.7  |
| P45448 | <i>Nr5a2</i>   | Nuclear receptor  | Low    | 3  | 1  | 1  | 1  | 560  | 64    | 8.21  | 0   | 94.7  | 99.1  | 76.4  | 105.8 | 90.7  | 133.3 |
| Q6PA06 | <i>Atl2</i>    | Atlantin-2        | High   | 15 | 6  | 9  | 5  | 583  | 66.2  | 5.43  | 131 | 95    | 94.8  | 92.2  | 102   | 114.3 | 101.8 |
| O35474 | <i>Edil3</i>   | EGF-like repeat   | High   | 6  | 3  | 3  | 3  | 480  | 53.7  | 7.58  | 39  | 98.1  | 106.9 | 97.5  | 90.9  | 101.1 | 105.5 |
| Q8BHK1 | <i>Nipa1</i>   | Magnesium         | Low    | 5  | 1  | 1  | 1  | 323  | 34.1  | 8.37  | 0   |       |       |       |       |       |       |
| Q8K2Q7 | <i>Brox</i>    | BR01 domain-      | High   | 18 | 6  | 10 | 6  | 411  | 46.2  | 7.69  | 121 | 106   | 101.9 | 106.4 | 95.5  | 95.5  | 94.6  |
| Q91YL3 | <i>Uckl1</i>   | Uridine-cytidine  | High   | 8  | 5  | 6  | 5  | 548  | 60.8  | 7.15  | 71  | 101.5 | 104   | 98.6  | 98.6  | 87.6  | 109.8 |
| Q9JIS8 | <i>Slc12a4</i> | Solute carrier    | High   | 6  | 6  | 15 | 1  | 1085 | 120.5 | 6.67  | 223 | 99.5  | 99.4  | 100   | 107.6 | 92.2  | 101.4 |
| Q8CI04 | <i>Cog3</i>    | Conserved         | Medium | 3  | 1  | 1  | 1  | 820  | 93.2  | 5.78  | 0   | 83.4  | 108   | 100.8 | 92.6  | 101.8 | 113.4 |
| Q8BL66 | <i>Eea1</i>    | Early endosome    | High   | 28 | 34 | 41 | 34 | 1411 | 160.8 | 5.77  | 705 | 96    | 96.4  | 95.3  | 98.1  | 100.5 | 113.7 |
| Q921M4 | <i>Golga2</i>  | Golgin subfamily  | High   | 7  | 5  | 5  | 5  | 999  | 113.2 | 5     | 62  | 99.2  | 100.5 | 106.2 | 94.2  | 100.5 | 99.3  |
| Q3US16 | <i>Tceanc</i>  | Transcription     | Low    | 4  | 1  | 1  | 1  | 359  | 40.6  | 8.13  | 0   |       |       |       |       |       |       |
| Q80XG9 | <i>Lrrtm4</i>  | Leucine-rich      | High   | 5  | 3  | 5  | 3  | 590  | 67.1  | 9     | 101 | 97    | 99.4  | 90.7  | 110.3 | 98.9  | 103.8 |
| Q8BH10 | <i>Orai2</i>   | Protein orai-2    | Medium | 3  | 1  | 1  | 1  | 250  | 28.2  | 7.94  | 22  |       |       |       |       |       |       |
| Q9DCC7 | <i>Isoc2b</i>  | Isochorismatase   | Medium | 4  | 1  | 1  | 1  | 210  | 23.1  | 8.18  | 13  |       |       |       |       |       |       |
| Q9Z329 | <i>Itpr2</i>   | Inositol 1,4,5-   | High   | 3  | 8  | 8  | 1  | 2701 | 307.3 | 6.44  | 55  | 122.1 | 100.3 | 127.4 | 83.7  | 80.5  | 85.9  |
| Q6Q783 | <i>Kmt5c</i>   | Histone-lysine N- | Low    | 3  | 1  | 1  | 1  | 468  | 53.1  | 9     | 0   | 90.4  | 96.5  | 103   | 121.9 | 96.9  | 91.4  |
| Q3TJZ6 | <i>Fam98a</i>  | Protein FAM98A    | High   | 5  | 2  | 3  | 1  | 515  | 55    | 8.95  | 64  | 141.3 | 86    | 172   | 64.2  | 67.8  | 68.7  |
| Q8K097 | <i>Faim2</i>   | Protein lifeguard | High   | 7  | 2  | 3  | 2  | 317  | 35.2  | 6.92  | 74  | 103.4 | 70.9  | 87.1  | 116.6 | 119.8 | 102.2 |
| Q8K2C8 | <i>Gpat4</i>   | Glycerol-3-       | Medium | 2  | 1  | 1  | 1  | 456  | 52.1  | 9.35  | 18  | 97.2  | 105.1 | 101   | 99.6  | 94.4  | 102.8 |
| Q5SUC9 | <i>Sco1</i>    | Protein SCO1      | High   | 3  | 1  | 1  | 1  | 284  | 31.6  | 8.47  | 31  |       |       |       |       |       |       |
| P53995 | <i>Anapc1</i>  | Anaphase-         | High   | 4  | 5  | 6  | 5  | 1944 | 215.9 | 6.35  | 48  | 101.8 | 94.3  | 106.9 | 100.7 | 94.9  | 101.4 |
| Q8VDJ3 | <i>Hdlbp</i>   | Vigilin OS=Mus    | High   | 24 | 25 | 29 | 25 | 1268 | 141.7 | 6.87  | 495 | 104.4 | 100.9 | 103.6 | 97    | 97.6  | 96.5  |
| O88910 | <i>Mpp3</i>    | MAGUK p55         | High   | 30 | 12 | 14 | 12 | 568  | 64.4  | 6.34  | 236 | 98.8  | 108.1 | 91.7  | 100   | 104.4 | 96.9  |
| O54833 | <i>Csnk2a2</i> | Casein kinase II  | High   | 24 | 8  | 12 | 7  | 350  | 41.2  | 8.56  | 111 | 98.1  | 99.7  | 94.2  | 103.2 | 99.1  | 105.7 |
| Q02614 | <i>Sap30bp</i> | SAP30-binding     | Low    | 4  | 1  | 1  | 1  | 308  | 33.8  | 4.87  | 0   |       |       |       |       |       |       |
| P0C7M9 | <i>Clec2l</i>  | C-type lectin     | High   | 12 | 2  | 2  | 2  | 211  | 23.6  | 7.2   | 0   | 98.8  | 89.8  | 96.3  | 108.7 | 103.2 | 103.2 |
| Q8K2Q9 | <i>Shtn1</i>   | Shootin-1         | High   | 3  | 2  | 2  | 2  | 631  | 71.3  | 5.44  | 32  | 99.6  | 96.1  | 98    | 94.6  | 96.6  | 115.1 |
| P51791 | <i>Clcn3</i>   | H(+)/Cl(-)        | High   | 4  | 3  | 3  | 3  | 818  | 90.8  | 6.19  | 55  | 96.9  | 102   | 103.1 | 94.6  | 99.4  | 104   |
| Q5RKR3 | <i>Islr2</i>   | Immunoglobulin    | High   | 8  | 5  | 5  | 5  | 745  | 79.7  | 5.49  | 89  | 97.4  | 98.4  | 95.1  | 103.4 | 97.9  | 107.8 |
| Q8VHJ5 | <i>Mark1</i>   | Serine/threonine  | High   | 20 | 15 | 21 | 9  | 795  | 88.3  | 9.39  | 419 | 95.8  | 97.5  | 88.8  | 107.7 | 103.9 | 106.3 |
| P28656 | <i>Nap111</i>  | Nucleosome        | High   | 19 | 6  | 12 | 5  | 391  | 45.3  | 4.46  | 268 | 99    | 102.2 | 90.9  | 99.8  | 106.4 | 101.7 |
| Q3TC72 | <i>Fahd2</i>   | Fumarylacetoac    | High   | 40 | 10 | 15 | 10 | 313  | 34.7  | 8.16  | 327 | 97.2  | 102.6 | 94.3  | 100.2 | 103.9 | 101.7 |
| Q3U2P1 | <i>Sec24a</i>  | Protein transport | High   | 1  | 1  | 1  | 1  | 1090 | 118.7 | 7.83  | 34  | 80.6  | 87.1  | 88.3  | 105.7 | 131.4 | 106.7 |
| P08071 | <i>Ltf</i>     | Lactotransferrin  | High   | 28 | 16 | 17 | 15 | 707  | 77.8  | 8.53  | 226 | 116.4 | 91.1  | 204.9 | 58.4  | 63.6  | 65.7  |
| A2AJ88 | <i>Pnpla7</i>  | Patatin-like      | Medium | 1  | 1  | 1  | 1  | 1352 | 150.4 | 6.92  | 17  | 98    | 107   | 116.2 | 89.3  | 93.2  | 96.3  |
| Q8VC19 | <i>Alas1</i>   | 5-                | Medium | 2  | 1  | 1  | 1  | 642  | 71    | 8.53  | 21  | 83.1  | 96.3  | 88.7  | 117   | 98.2  | 116.8 |
| Q9QYA2 | <i>Tom40</i>   | Mitochondrial     | High   | 27 | 6  | 9  | 6  | 361  | 37.9  | 7.74  | 170 | 94.8  | 99.5  | 93.2  | 105.6 | 101.8 | 105   |
| P46935 | <i>Nedd4</i>   | E3 ubiquitin-     | High   | 20 | 14 | 15 | 13 | 887  | 102.6 | 5.26  | 205 | 100.5 | 98.5  | 108.8 | 96.6  | 96.7  | 98.9  |
| Q9CQZ5 | <i>Ndufa6</i>  | NADH              | High   | 37 | 4  | 16 | 4  | 131  | 15.3  | 10.11 | 289 | 94.4  | 103.9 | 91.5  | 102.7 | 102.5 | 105   |
| Q03173 | <i>Enah</i>    | Protein enabled   | High   | 9  | 7  | 7  | 6  | 802  | 85.8  | 7.72  | 36  | 97    | 102   | 97.1  | 100   | 101.5 | 102.5 |
| Q9CQ10 | <i>Chmp3</i>   | Charged           | High   | 14 | 4  | 5  | 4  | 224  | 25.2  | 5.06  | 83  | 90.3  | 93.1  | 92.1  | 127.1 | 92.4  | 105   |
| P97820 | <i>Map4k4</i>  | Mitogen-          | High   | 5  | 6  | 8  | 1  | 1233 | 140.5 | 7.47  | 84  | 99    | 96.7  | 105.7 | 106.2 | 97.7  | 94.7  |
| P62270 | <i>Rps18</i>   | 40S ribosomal     | High   | 19 | 3  | 5  | 3  | 152  | 17.7  | 10.99 | 57  | 107.4 | 103.1 | 100.5 | 100.5 | 97.3  | 91.1  |
| Q99PT1 | <i>Arhgdia</i> | Rho GDP-          | High   | 65 | 11 | 32 | 11 | 204  | 23.4  | 5.2   | 682 | 107.9 | 95.9  | 116.7 | 88.7  | 96.4  | 94.5  |
| Q9DB26 | <i>Phyhd1</i>  | Phytanoyl-CoA     | High   | 9  | 2  | 2  | 2  | 291  | 32.5  | 6.34  | 39  | 121.4 | 106.7 | 141   | 73.5  | 86.3  | 71.1  |
| Q9DB60 | <i>Prxl2b</i>  | Prostamide/prost  | High   | 5  | 1  | 1  | 1  | 201  | 21.7  | 6.74  | 45  | 101.1 | 90.5  | 97.9  | 104.4 | 108.8 | 97.2  |
| Q3V4B5 | <i>Comm6</i>   | COMM domain-      | High   | 44 | 3  | 3  | 3  | 87   | 9.8   | 5.38  | 20  | 105.2 | 100.7 | 103   | 96.1  | 95.6  | 99.3  |
| O70166 | <i>Stmn3</i>   | Stathmin-3        | High   | 21 | 5  | 5  | 5  | 180  | 20.9  | 7.49  | 78  | 98.7  | 97    | 95.8  | 94.8  | 97    | 116.7 |
| Q3TRM8 | <i>Hk3</i>     | Hexokinase-3      | High   | 6  | 4  | 10 | 2  | 922  | 100   | 5.94  | 194 | 101.5 | 93.4  | 117.4 | 89.6  | 91.5  | 106.6 |
| Q9D7E4 |                | UPF0449 protein   | High   | 27 | 2  | 2  | 2  | 109  | 12.1  | 5.25  | 43  | 105.2 | 109.1 | 91.4  | 99.3  | 102.3 | 92.7  |
| P97370 | <i>Atp1b3</i>  | Sodium/potassiu   | High   | 36 | 8  | 16 | 8  | 278  | 31.8  | 8.51  | 263 | 98.1  | 103.9 | 95.5  | 100.5 | 102.2 | 99.8  |

|        |                  |                   |        |    |    |    |    |      |       |       |      |       |       |       |       |       |       |
|--------|------------------|-------------------|--------|----|----|----|----|------|-------|-------|------|-------|-------|-------|-------|-------|-------|
| Q68FH4 | <i>Galk2</i>     | N-                | High   | 5  | 2  | 2  | 2  | 458  | 50.5  | 6.9   | 14   | 94.1  | 90.8  | 110.1 | 102.5 | 101.8 | 100.6 |
| Q8BGX1 | <i>Pced1b</i>    | PC-esterase       | Low    | 4  | 1  | 1  | 1  | 433  | 49.9  | 8.28  | 0    | 98.5  | 94.1  | 97.8  | 109.6 | 118.7 | 81.2  |
| Q8CAQ8 | <i>Immt</i>      | MICOS complex     | High   | 57 | 42 | 82 | 42 | 757  | 83.8  | 6.61  | 1462 | 99.7  | 103.1 | 94    | 101   | 102.8 | 99.5  |
| Q8BMB3 | <i>Eif4e2</i>    | Eukaryotic        | High   | 15 | 3  | 5  | 3  | 245  | 28.2  | 8.87  | 81   | 94.1  | 100.6 | 96.6  | 102.7 | 103.7 | 102.4 |
| Q8BPP0 | <i>Mob1b</i>     | MOB kinase        | High   | 11 | 2  | 2  | 2  | 216  | 25.1  | 6.73  | 28   |       |       |       |       |       |       |
| Q9CZX0 | <i>Elp3</i>      | Elongator         | High   | 9  | 4  | 7  | 4  | 547  | 62.3  | 8.9   | 141  | 101.6 | 97.4  | 107.8 | 96.2  | 98.2  | 98.7  |
| Q8K2M0 | <i>Mrpl38</i>    | 39S ribosomal     | Medium | 5  | 1  | 1  | 1  | 380  | 45    | 8.1   | 20   |       |       |       |       |       |       |
| A2BIM8 | <i>Mup18</i>     | Major urinary     | High   | 43 | 6  | 9  | 1  | 181  | 20.7  | 4.94  | 180  |       |       |       |       |       |       |
| Q8JZR0 | <i>AcsI5</i>     | Long-chain-fatty- | High   | 11 | 6  | 6  | 5  | 683  | 76.2  | 7.09  | 61   | 103.9 | 104.2 | 104.1 | 94.3  | 91.6  | 101.8 |
| Q6NXX8 | <i>Asic1</i>     | Acid-sensing ion  | High   | 6  | 2  | 2  | 2  | 526  | 59.6  | 5.58  | 0    | 94.6  | 79.6  | 91.3  | 118.2 | 103.7 | 112.6 |
| Q3B7Z2 | <i>Osbp</i>      | Oxysterol-        | High   | 23 | 14 | 17 | 14 | 805  | 88.7  | 7.2   | 278  | 96.9  | 100.2 | 97.8  | 101.4 | 101   | 102.7 |
| P34884 | <i>Mif</i>       | Macrophage        | High   | 23 | 3  | 9  | 3  | 115  | 12.5  | 7.34  | 83   | 100.2 | 105.2 | 93.8  | 97.4  | 103.5 | 99.9  |
| Q9DC28 | <i>Csnk1d</i>    | Casein kinase I   | High   | 19 | 7  | 8  | 3  | 415  | 47.3  | 9.74  | 128  | 98.2  | 96.4  | 96.8  | 103.8 | 101.3 | 103.5 |
| Q9D6Y9 | <i>Gbe1</i>      | 1,4-alpha-        | High   | 12 | 7  | 7  | 7  | 702  | 80.3  | 6.43  | 100  | 98.3  | 101.3 | 98.5  | 104.6 | 99    | 98.3  |
| Q8CG76 | <i>Akr7a2</i>    | Aflatoxin B1      | High   | 21 | 6  | 6  | 6  | 367  | 40.6  | 8.12  | 67   | 104   | 95.9  | 104.4 | 95.1  | 96    | 104.7 |
| Q2VPQ9 | <i>Meaf6</i>     | Chromatin         | High   | 12 | 1  | 1  | 1  | 191  | 21.6  | 9.32  | 41   | 101.1 | 105   | 89.4  | 106.8 | 109.2 | 88.5  |
| Q3UUJ4 | <i>Strada</i>    | STE20-related     | High   | 8  | 2  | 2  | 2  | 431  | 48.2  | 6.43  | 49   | 82.6  | 106.1 | 83.7  | 101.7 | 114.4 | 111.6 |
| Q9JHZ2 | <i>Ankh</i>      | Progressive       | High   | 8  | 3  | 3  | 3  | 492  | 54.3  | 7.88  | 49   | 105.4 | 102.1 | 105.1 | 98.9  | 90.5  | 98.1  |
| Q8BHI4 | <i>Kbtbd3</i>    | Kelch repeat and  | High   | 3  | 2  | 2  | 2  | 607  | 69.5  | 5.71  | 41   | 102.1 | 101   | 94.3  | 105.8 | 102   | 94.9  |
| Q99KX1 | <i>Mif2</i>      | Myeloid           | High   | 31 | 7  | 8  | 7  | 247  | 28    | 6.98  | 168  | 95    | 107.2 | 90.1  | 104   | 102.8 | 101.1 |
| Q14C51 | <i>Ptcd3</i>     | Pentatricopeptid  | High   | 7  | 4  | 4  | 4  | 685  | 77.7  | 5.88  | 68   | 99.9  | 101.2 | 87.9  | 99.9  | 105   | 106.2 |
| Q91YQ3 | <i>Csdc2</i>     | Cold shock        | High   | 11 | 2  | 2  | 2  | 154  | 16.8  | 7.55  | 59   | 94.4  | 109.4 | 93.7  | 104.6 | 100.1 | 97.8  |
| Q9CRC3 |                  | UPF0235 protein   | High   | 10 | 1  | 1  | 1  | 126  | 13.2  | 9.16  | 38   | 104.2 | 96.8  | 102.2 | 97.5  | 100.4 | 98.8  |
| Q9DBR0 | <i>Akap8</i>     | A-kinase anchor   | High   | 3  | 2  | 2  | 2  | 687  | 76.2  | 5.14  | 51   | 92    | 92.2  | 101.1 | 112.1 | 99.5  | 103.1 |
| Q80TI0 | <i>Gramd1b</i>   | Protein Aster-B   | High   | 10 | 6  | 6  | 6  | 738  | 85.3  | 6.14  | 132  | 94.1  | 97    | 89.6  | 101.4 | 106.7 | 111.2 |
| Q6AXF6 | <i>Sidt1</i>     | SID1              | High   | 2  | 2  | 2  | 2  | 827  | 93.8  | 6.87  | 24   | 88    | 100.9 | 88.3  | 106   | 106.4 | 110.4 |
| Q9DB70 | <i>Fundc1</i>    | FUN14 domain-     | High   | 19 | 2  | 2  | 2  | 155  | 17.1  | 8.63  | 34   | 100.9 | 92.3  | 109.2 | 95.1  | 98.7  | 103.7 |
| Q3UYV9 | <i>Ncbp1</i>     | Nuclear cap-      | High   | 6  | 4  | 6  | 4  | 790  | 91.9  | 6.64  | 134  | 102.6 | 100.4 | 103.7 | 96.6  | 100.8 | 96    |
| Q04750 | <i>Top1</i>      | DNA               | High   | 13 | 10 | 12 | 10 | 767  | 90.8  | 9.33  | 139  | 99.6  | 103.9 | 98.2  | 98.2  | 101.1 | 99    |
| P26369 | <i>U2af2</i>     | Splicing factor   | High   | 23 | 8  | 14 | 8  | 475  | 53.5  | 9.09  | 304  | 100.1 | 98.2  | 99.4  | 101.6 | 97.7  | 103   |
| Q8BU14 | <i>Sec62</i>     | Translocation     | High   | 8  | 3  | 4  | 3  | 398  | 45.6  | 7.31  | 65   | 102.5 | 98    | 108.2 | 95.2  | 95.1  | 100.9 |
| Q80V03 | <i>Adck5</i>     | Uncharacterized   | Medium | 3  | 1  | 1  | 1  | 582  | 66.6  | 8.76  | 0    |       |       |       |       |       |       |
| Q8C570 | <i>Rae1</i>      | mRNA export       | High   | 11 | 3  | 3  | 3  | 368  | 40.9  | 7.83  | 41   | 97.2  | 100.3 | 95.5  | 103.2 | 99.7  | 104.1 |
| Q9CWS0 | <i>Ddah1</i>     | N(G),N(G)-        | High   | 66 | 17 | 35 | 16 | 285  | 31.4  | 5.97  | 733  | 99.3  | 98.3  | 102.3 | 97.7  | 97.9  | 104.5 |
| P05201 | <i>Got1</i>      | Aspartate         | High   | 60 | 21 | 62 | 21 | 413  | 46.2  | 7.14  | 1220 | 95.9  | 100.1 | 93.9  | 104.5 | 103.4 | 102.2 |
| Q3TQI7 |                  | Telomere length   | High   | 9  | 3  | 3  | 3  | 289  | 33.5  | 6.34  | 19   | 100.3 | 93.1  | 103.3 | 100.6 | 97.4  | 105.3 |
| Q5SQY2 | <i>Bod1</i>      | Biorientation of  | High   | 6  | 1  | 1  | 1  | 173  | 18.4  | 5.9   | 40   | 97.9  | 103.4 | 87.7  | 96    | 91.1  | 123.8 |
| Q8CCX5 | <i>Krt222</i>    | Keratin-like      | High   | 9  | 3  | 3  | 3  | 294  | 34.2  | 5.78  | 59   | 93.6  | 107.6 | 84.1  | 104.8 | 99.3  | 110.6 |
| Q61790 | <i>Lag3</i>      | Lymphocyte        | Medium | 3  | 1  | 1  | 1  | 521  | 56.9  | 8.25  | 18   |       |       |       |       |       |       |
| Q61646 | <i>Hp</i>        | Haptoglobin       | High   | 39 | 13 | 32 | 13 | 347  | 38.7  | 6.29  | 454  | 225.7 | 70.3  | 181.4 | 39.7  | 40.5  | 42.5  |
| Q641P0 | <i>Actr3b</i>    | Actin-related     | High   | 46 | 16 | 31 | 13 | 418  | 47.5  | 6.02  | 345  | 92.5  | 98.5  | 90.6  | 106.4 | 106.2 | 105.9 |
| P47915 | <i>Rpl29</i>     | 60S ribosomal     | High   | 16 | 3  | 7  | 3  | 160  | 17.6  | 11.84 | 82   | 98.8  | 94.7  | 102.3 | 102.3 | 100.1 | 101.7 |
| Q9EPV8 | <i>Ubl5</i>      | Ubiquitin-like    | Medium | 12 | 1  | 1  | 1  | 73   | 8.5   | 8.44  | 23   | 102.4 | 102.6 | 109.7 | 98.6  | 94.1  | 92.6  |
| Q9QZ08 | <i>Nagk</i>      | N-acetyl-D-       | High   | 20 | 5  | 6  | 5  | 343  | 37.2  | 5.73  | 77   | 97.7  | 92.1  | 99.3  | 95.2  | 101.1 | 114.6 |
| Q9DCS9 | <i>Ndufb10</i>   | NADH              | High   | 57 | 9  | 21 | 9  | 176  | 21    | 8.03  | 416  | 92.3  | 104.1 | 89.3  | 107.4 | 102.2 | 104.7 |
| Q7TNS2 | <i>Micos10</i>   | MICOS complex     | High   | 11 | 1  | 1  | 1  | 76   | 8.6   | 8.94  | 44   | 101.8 | 104.6 | 113.6 | 103   | 90.9  | 86    |
| Q9Z218 | <i>Dpp6</i>      | Dipeptidyl        | High   | 24 | 18 | 34 | 16 | 804  | 91.2  | 6.68  | 609  | 94.1  | 93.8  | 97.6  | 101.7 | 106.7 | 106.1 |
| P39087 | <i>Grik2</i>     | Glutamate         | High   | 9  | 6  | 9  | 5  | 908  | 102.4 | 7.77  | 125  | 88.5  | 99.7  | 89.8  | 106.2 | 103.3 | 112.6 |
| Q8K0D5 | <i>Gfm1</i>      | Elongation factor | High   | 22 | 12 | 17 | 12 | 751  | 83.5  | 6.92  | 284  | 100.4 | 98.2  | 103   | 99.1  | 101.2 | 98.1  |
| P27545 | <i>Cers1</i>     | Ceramide          | High   | 6  | 1  | 1  | 1  | 350  | 40.1  | 8.38  | 29   |       |       |       |       |       |       |
| Q9CYS6 |                  | Uncharacterized   | High   | 11 | 2  | 3  | 2  | 286  | 30.3  | 6.05  | 59   | 54.7  | 84    | 125.9 | 67.3  | 144.1 | 124.1 |
| Q9JJU8 | <i>Sh3bgr1</i>   | SH3 domain-       | High   | 32 | 3  | 4  | 3  | 114  | 12.8  | 4.92  | 92   | 110.9 | 96.7  | 112.8 | 92.9  | 95.4  | 91.3  |
| Q8CAE9 | <i>Podxl2</i>    | Podocalyxin-like  | High   | 2  | 1  | 1  | 1  | 603  | 64.9  | 4.36  | 44   | 108.5 | 142.5 | 61.2  | 114.2 | 65.4  | 108.2 |
| P48759 | <i>Ptx3</i>      | Pentraxin-related | High   | 10 | 3  | 3  | 3  | 381  | 41.8  | 5.38  | 38   | 107.5 | 100.4 | 93.1  | 89.6  | 107.4 | 102   |
| Q8CHH9 | <i>Septin8</i>   | Septin-8          | High   | 30 | 11 | 31 | 7  | 429  | 49.8  | 6     | 511  | 98.2  | 105.5 | 90.7  | 101.4 | 102.7 | 101.5 |
| Q8C015 | <i>Pak5</i>      | Serine/threonine  | High   | 7  | 4  | 4  | 4  | 719  | 80.9  | 8.21  | 68   | 94.8  | 103.7 | 89.8  | 105.2 | 102.6 | 103.8 |
| A2AWP8 | <i>Arhgef10l</i> | Rho guanine       | High   | 4  | 4  | 4  | 4  | 1280 | 139.9 | 5.82  | 50   | 100   | 96.7  | 98.1  | 94.5  | 101.6 | 109.1 |
| Q9CZ42 | <i>Naxd</i>      | ATP-dependent     | High   | 36 | 9  | 12 | 9  | 343  | 36.7  | 7.77  | 299  | 96.4  | 96.6  | 94.1  | 102.1 | 106.4 | 104.3 |
| Q7TT37 | <i>Elp1</i>      | Elongator         | High   | 11 | 14 | 17 | 14 | 1333 | 149.5 | 6     | 183  | 104   | 100.5 | 101.4 | 98.7  | 96.5  | 98.8  |
| O08528 | <i>Hk2</i>       | Hexokinase-2      | High   | 8  | 7  | 17 | 2  | 917  | 102.5 | 6.11  | 310  | 112.5 | 107.4 | 132.1 | 82.7  | 83.7  | 81.7  |
| Q60902 | <i>Eps15l1</i>   | Epidermal         | High   | 36 | 24 | 33 | 24 | 907  | 99.2  | 5.02  | 658  | 94.1  | 98.9  | 93.3  | 101.5 | 105.2 | 107   |
| Q8VEH8 | <i>Erlc1</i>     | Endoplasmic       | High   | 5  | 2  | 2  | 2  | 483  | 54.9  | 6.25  | 70   | 85.1  | 95.7  | 112.8 | 106.2 | 104.3 | 96    |
| P31750 | <i>Akt1</i>      | RAC-alpha         | High   | 13 | 6  | 9  | 1  | 480  | 55.7  | 5.9   | 136  | 106.7 | 99.8  | 106.2 | 93.8  | 100.3 | 93.2  |
| Q60631 | <i>Grb2</i>      | Growth factor     | High   | 46 | 11 | 17 | 11 | 217  | 25.2  | 6.32  | 198  | 98.5  | 98.6  | 99.2  | 98    | 100.1 | 105.7 |
| Q8BP40 | <i>Acp6</i>      | Lysophosphatidi   | High   | 11 | 4  | 4  | 4  | 418  | 47.6  | 7.72  | 59   | 101.8 | 104.3 | 100   | 92    | 97    | 104.9 |
| Q91WT9 | <i>Cbs</i>       | Cystathionine     | High   | 11 | 4  | 4  | 4  | 561  | 61.5  | 6.48  | 71   | 103.8 | 99.5  | 101.6 | 98.3  | 94.2  | 102.6 |
| Q3TMH2 | <i>Scrn3</i>     | Secernin-3        | High   | 24 | 7  | 10 | 7  | 418  | 47.6  | 5.66  | 153  | 98.7  | 103.9 | 100.4 | 100.5 | 96.7  | 100   |
| Q8K2T1 | <i>Nmral1</i>    | Nmra-like family  | High   | 25 | 8  | 9  | 8  | 309  | 34.4  | 6.86  | 162  | 101.1 | 97.8  | 97.2  | 95.9  | 94.9  | 113.2 |

|        |                  |                    |        |    |    |    |    |      |       |       |      |       |       |       |       |       |       |
|--------|------------------|--------------------|--------|----|----|----|----|------|-------|-------|------|-------|-------|-------|-------|-------|-------|
| Q9CR00 | <i>Psmid9</i>    | 26S proteasome     | High   | 37 | 7  | 8  | 7  | 222  | 24.7  | 6.43  | 138  | 99.8  | 99.8  | 101.8 | 101.8 | 98.6  | 98.2  |
| D3YZU1 | <i>Shank1</i>    | SH3 and multiple   | High   | 15 | 26 | 34 | 25 | 2167 | 226.2 | 8.34  | 433  | 96.4  | 97.2  | 88.4  | 110.3 | 101.8 | 105.9 |
| P26883 | <i>Fkbp1a</i>    | Peptidyl-prolyl    | High   | 40 | 3  | 12 | 3  | 108  | 11.9  | 8.16  | 311  | 90.7  | 95.6  | 91.2  | 108.1 | 105.7 | 108.7 |
| Q8JZW5 | <i>Sh2d5</i>     | SH2 domain-        | High   | 7  | 3  | 3  | 3  | 429  | 47.4  | 8.47  | 23   | 99.2  | 100.9 | 106.1 | 99.3  | 95.2  | 99.3  |
| P67984 | <i>Rpl22</i>     | 60S ribosomal      | High   | 39 | 3  | 5  | 3  | 128  | 14.8  | 9.19  | 136  | 103.2 | 105.4 | 99.2  | 101   | 98.3  | 92.9  |
| Q3UTZ3 | <i>MAP11</i>     | Microtubule-       | High   | 5  | 3  | 3  | 3  | 580  | 62.7  | 8.68  | 82   | 99.7  | 98.7  | 96.1  | 103   | 104.6 | 97.8  |
| P97798 | <i>Neo1</i>      | Neogenin           | High   | 8  | 9  | 9  | 9  | 1493 | 163.1 | 6.47  | 129  | 105.8 | 93.9  | 102.8 | 96.1  | 101   | 100.3 |
| Q9CPR4 | <i>Rpl17</i>     | 60S ribosomal      | High   | 40 | 6  | 15 | 5  | 184  | 21.4  | 10.18 | 195  | 102.1 | 99.1  | 100.7 | 102.5 | 97.6  | 98    |
| E9Q7G0 | <i>Numa1</i>     | Nuclear mitotic    | High   | 9  | 15 | 19 | 15 | 2094 | 235.5 | 5.87  | 255  | 101.4 | 96.3  | 107.4 | 96.7  | 96.9  | 101.3 |
| P35979 | <i>Rpl12</i>     | 60S ribosomal      | High   | 55 | 7  | 13 | 7  | 165  | 17.8  | 9.42  | 294  | 105   | 101.8 | 106.3 | 96.6  | 96.6  | 93.6  |
| Q6GQT6 | <i>Scap</i>      | Sterol regulatory  | Low    | 1  | 1  | 1  | 1  | 1276 | 139.5 | 7.08  | 0    |       |       |       |       |       |       |
| Q35250 | <i>Exoc7</i>     | Exocyst complex    | High   | 25 | 16 | 19 | 16 | 697  | 79.9  | 6.98  | 275  | 100.2 | 103.4 | 96    | 101.3 | 98.5  | 100.6 |
| Q9Z2Y3 | <i>Homer1</i>    | Homer protein      | High   | 54 | 17 | 29 | 16 | 366  | 41.4  | 5.53  | 451  | 109.5 | 96.4  | 97.7  | 101.5 | 98.6  | 96.3  |
| Q9CQY6 | <i>Uqc2</i>      | Ubiquinol-         | High   | 21 | 2  | 3  | 2  | 136  | 16.3  | 9.19  | 145  | 100.9 | 103.8 | 99.9  | 93.7  | 102.6 | 99.1  |
| Q80W54 | <i>Zmpste24</i>  | CAAX prenyl        | High   | 19 | 8  | 9  | 8  | 475  | 54.7  | 6.95  | 147  | 105.8 | 103.8 | 113.8 | 91.6  | 92.6  | 92.5  |
| P48455 | <i>Ppp3cc</i>    | Serine/threonine   | High   | 11 | 5  | 15 | 1  | 513  | 58.7  | 7.25  | 244  | 94    | 89.4  | 87    | 113.6 | 108.3 | 107.7 |
| Q80SZ7 | <i>Gng5</i>      | Guanine            | High   | 28 | 2  | 2  | 2  | 68   | 7.3   | 9.85  | 46   | 105.8 | 115.3 | 111.8 | 87.2  | 90.9  | 89    |
| Q8BTV2 | <i>Cpsf7</i>     | Cleavage and       | High   | 13 | 5  | 6  | 5  | 471  | 52    | 8     | 90   | 97.1  | 99.8  | 96.4  | 104.2 | 101.6 | 100.9 |
| Q9EP89 | <i>Lactb</i>     | Serine beta-       | High   | 23 | 11 | 16 | 11 | 551  | 60.7  | 8.9   | 219  | 93.8  | 103   | 91.2  | 103.4 | 103.4 | 105.3 |
| Q9D666 | <i>Sun1</i>      | SUN domain-        | High   | 5  | 3  | 3  | 3  | 913  | 101.9 | 6.81  | 53   |       |       |       |       |       |       |
| P22599 | <i>Serpina1b</i> | Alpha-1-           | High   | 32 | 12 | 34 | 3  | 413  | 45.9  | 5.54  | 727  | 182.4 | 58    | 259.8 | 31.3  | 33.6  | 35    |
| Q63912 | <i>Omg</i>       | Oligodendrocyte-   | High   | 18 | 7  | 15 | 7  | 440  | 49.3  | 8.41  | 208  | 95.1  | 107   | 91.9  | 105.9 | 101.5 | 98.6  |
| Q8BGK5 | <i>Slc35f1</i>   | Solute carrier     | High   | 5  | 2  | 2  | 2  | 408  | 45.3  | 7.43  | 32   | 94.2  | 93.3  | 101.3 | 99.5  | 106.3 | 105.4 |
| Q8BM85 | <i>Tbck</i>      | TBC domain-        | High   | 2  | 2  | 2  | 2  | 762  | 86.3  | 6.2   | 0    |       |       |       |       |       |       |
| Q6P5F6 | <i>Slc39a10</i>  | Zinc transporter   | High   | 10 | 6  | 11 | 6  | 833  | 94.3  | 6.71  | 103  | 102.7 | 100   | 92.2  | 105.1 | 103   | 97.1  |
| Q9QY01 | <i>Ulk2</i>      | Serine/threonine   | Medium | 1  | 1  | 1  | 1  | 1037 | 112.8 | 8.53  | 21   |       |       |       |       |       |       |
| Q9CQ22 | <i>Lamtor1</i>   | Ragulator          | High   | 30 | 3  | 3  | 3  | 161  | 17.7  | 5.15  | 71   | 96.9  | 102.9 | 103.1 | 99.1  | 98    | 100.1 |
| Q2EMV9 | <i>Parp14</i>    | Protein mono-      | High   | 1  | 3  | 3  | 2  | 1817 | 203.7 | 6.79  | 17   |       |       |       |       |       |       |
| Q7SIG6 | <i>Asap2</i>     | Arf-GAP with       | High   | 9  | 6  | 6  | 6  | 958  | 106.7 | 6.65  | 105  | 90.5  | 94.1  | 83.6  | 104.3 | 108.4 | 119.2 |
| Q9D1G1 | <i>Rab1b</i>     | Ras-related        | High   | 79 | 13 | 53 | 6  | 201  | 22.2  | 5.73  | 1493 | 99.3  | 100.5 | 94.7  | 101.6 | 103.5 | 100.4 |
| Q8K3W0 | <i>Babam2</i>    | BRISC and          | High   | 5  | 2  | 2  | 2  | 383  | 43.5  | 5.94  | 15   |       |       |       |       |       |       |
| Q9DBG9 | <i>Tax1bp3</i>   | Tax1-binding       | High   | 14 | 1  | 1  | 1  | 124  | 13.7  | 8.48  | 51   | 100.2 | 107.4 | 126.8 | 88.2  | 85.9  | 91.5  |
| Q9D2M8 | <i>Ube2v2</i>    | Ubiquitin-         | High   | 58 | 8  | 19 | 3  | 145  | 16.4  | 8.09  | 254  | 98    | 101.8 | 88.5  | 109.7 | 100.1 | 101.9 |
| Q64282 | <i>Ifit1</i>     | Interferon-        | High   | 19 | 8  | 9  | 8  | 463  | 53.7  | 7.52  | 79   | 109.7 | 122.6 | 122.7 | 81.5  | 79.1  | 84.4  |
| Q9WVT6 | <i>Ca14</i>      | Carbonic           | High   | 4  | 1  | 2  | 1  | 337  | 37.5  | 6.35  | 45   | 90.2  | 121   | 96.1  | 90.8  | 100.7 | 101.2 |
| Q8K0C1 | <i>Ipo13</i>     | Importin-13        | High   | 2  | 2  | 2  | 2  | 963  | 108.2 | 5.3   | 0    | 117.8 | 94.3  | 115   | 90.4  | 76.9  | 105.6 |
| P62915 | <i>Gtf2b</i>     | Transcription      | Medium | 3  | 1  | 1  | 1  | 316  | 34.8  | 8.35  | 22   |       |       |       |       |       |       |
| P50428 | <i>Arsa</i>      | Arylsulfatase A    | High   | 3  | 1  | 1  | 1  | 506  | 53.7  | 5.87  | 44   |       |       |       |       |       |       |
| P02463 | <i>Col4a1</i>    | Collagen alpha-    | High   | 1  | 2  | 2  | 2  | 1669 | 160.6 | 8.24  | 21   | 96.8  | 81    | 111   | 91.2  | 100.5 | 119.5 |
| Q00493 | <i>Cpe</i>       | Carboxypeptidas    | High   | 41 | 16 | 18 | 16 | 476  | 53.2  | 5.19  | 243  | 102.7 | 97.3  | 109   | 92.6  | 91.9  | 106.5 |
| P83940 | <i>Eloc</i>      | Elongin-C          | High   | 50 | 4  | 7  | 4  | 112  | 12.5  | 4.78  | 70   | 101.2 | 100.5 | 103.3 | 99.5  | 101.2 | 94.3  |
| P01872 | <i>Ighm</i>      | Immunoglobulin     | High   | 14 | 4  | 6  | 4  | 454  | 49.9  | 7.01  | 143  | 150.6 | 68.4  | 202.2 | 57.6  | 60.3  | 60.9  |
| Q9DBE8 | <i>Alg2</i>      | Alpha-1,3/1,6-     | High   | 39 | 11 | 15 | 11 | 415  | 47.4  | 7.97  | 276  | 96    | 97.6  | 93.7  | 102.8 | 103.5 | 106.4 |
| Q8C0L0 | <i>Tmx4</i>      | Thioredoxin-       | High   | 17 | 4  | 6  | 4  | 335  | 37.1  | 4.37  | 149  | 93.9  | 95.2  | 86.4  | 106.8 | 108   | 109.6 |
| Q91VR5 | <i>Ddx1</i>      | ATP-dependent      | High   | 32 | 19 | 27 | 19 | 740  | 82.4  | 7.21  | 477  | 100.9 | 102   | 99.2  | 100.9 | 97.5  | 99.5  |
| Q9CRA7 | <i>Dmac2l</i>    | ATP synthase       | High   | 19 | 4  | 4  | 4  | 200  | 23.3  | 8.06  | 58   | 94    | 108.4 | 90.6  | 108.1 | 100.4 | 98.5  |
| P09925 | <i>Surf1</i>     | Surfeit locus      | High   | 12 | 3  | 4  | 3  | 306  | 34.8  | 9.72  | 58   | 105.5 | 99.2  | 118.8 | 92.1  | 95.7  | 88.8  |
| Q9D850 | <i>Tmem68</i>    | Transmembrane      | High   | 9  | 2  | 2  | 2  | 329  | 37.8  | 8.46  | 20   | 93.5  | 98.6  | 95.4  | 101.7 | 106   | 104.7 |
| Q3UX10 | <i>Tuba3</i>     | Tubulin alpha      | High   | 8  | 4  | 28 | 1  | 446  | 50    | 5.58  | 268  | 100.1 | 104.8 | 91.8  | 108.1 | 92.3  | 103   |
| P16283 | <i>Slc4a3</i>    | Anion exchange     | High   | 7  | 6  | 6  | 6  | 1227 | 135.3 | 6.51  | 105  | 90.2  | 106.3 | 93.4  | 101.6 | 98.9  | 109.6 |
| Q01339 | <i>ApoH</i>      | Beta-2-            | High   | 5  | 2  | 2  | 2  | 345  | 38.6  | 8.22  | 46   | 161.6 | 78.4  | 186.6 | 56.8  | 58.4  | 58.2  |
| Q9D1P4 | <i>Chordc1</i>   | Cysteine and       | High   | 26 | 6  | 8  | 6  | 331  | 37.3  | 7.9   | 151  | 110.7 | 100.3 | 114.3 | 95.8  | 89.7  | 89.1  |
| Q8VE11 | <i>Mttr6</i>     | Myotubularin-      | High   | 3  | 2  | 2  | 2  | 617  | 70.9  | 7.83  | 27   | 93.4  | 101.5 | 102.1 | 105.3 | 96.5  | 101.2 |
| Q8BWF0 | <i>Aldh5a1</i>   | Succinate-         | High   | 46 | 20 | 38 | 20 | 523  | 55.9  | 8.25  | 838  | 96.4  | 101.1 | 93.7  | 105.4 | 102.9 | 100.3 |
| O89079 | <i>Cope</i>      | Coatomer           | High   | 23 | 4  | 6  | 4  | 308  | 34.5  | 5.06  | 94   | 116.8 | 91.4  | 133.7 | 85.1  | 89    | 84    |
| Q99LT0 | <i>Dpy30</i>     | Protein dpy-30     | Medium | 9  | 1  | 1  | 1  | 99   | 11.2  | 4.88  | 23   | 96.1  | 99.7  | 96.3  | 103.9 | 100.8 | 103.3 |
| Q9CQR6 | <i>Ppp6c</i>     | Serine/threonine   | High   | 31 | 7  | 8  | 7  | 305  | 35.1  | 5.69  | 132  | 98.4  | 99.9  | 96.4  | 103   | 103.1 | 99.4  |
| Q61687 | <i>Atrx</i>      | Transcriptional    | High   | 1  | 2  | 2  | 2  | 2476 | 278.4 | 6.68  | 22   |       |       |       |       |       |       |
| Q99KF1 | <i>Tmed9</i>     | Transmembrane      | High   | 30 | 6  | 8  | 5  | 235  | 27.1  | 8.41  | 78   | 102.9 | 97.9  | 100.9 | 94.9  | 104.8 | 98.6  |
| Q8BMS1 | <i>Hadha</i>     | Trifunctional      | High   | 37 | 23 | 50 | 23 | 763  | 82.6  | 9.14  | 1193 | 102.8 | 103.1 | 108.9 | 94.6  | 96.8  | 93.8  |
| O89086 | <i>Rbm3</i>      | RNA-binding        | High   | 12 | 1  | 1  | 1  | 153  | 16.6  | 7.5   | 33   | 101.7 | 101.3 | 101.6 | 95.7  | 106.4 | 93.3  |
| Q6ZWQ7 | <i>Spcs3</i>     | Signal peptidase   | Medium | 6  | 1  | 1  | 1  | 180  | 20.3  | 8.62  | 21   | 111.6 | 99.3  | 111.9 | 94.4  | 95    | 87.7  |
| O89051 | <i>Itm2b</i>     | Integral           | High   | 30 | 7  | 8  | 7  | 266  | 30.2  | 5.3   | 108  | 104.2 | 100.6 | 116.5 | 89.5  | 94.6  | 94.6  |
| Q06180 | <i>Ptpn2</i>     | Tyrosine-protein   | High   | 8  | 2  | 2  | 2  | 406  | 47.3  | 8.37  | 62   | 95.9  | 101   | 88.8  | 100.6 | 107.9 | 105.8 |
| P17918 | <i>Pcna</i>      | Proliferating cell | High   | 18 | 3  | 3  | 3  | 261  | 28.8  | 4.77  | 28   | 108   | 103   | 126   | 86.3  | 87.8  | 88.8  |
| Q6ZPJ3 | <i>Ube2o</i>     | (E3-               | High   | 24 | 22 | 29 | 22 | 1288 | 140.7 | 5.06  | 563  | 98.2  | 100.5 | 94    | 102.1 | 103.7 | 101.5 |
| Q9CYN2 | <i>Spcs2</i>     | Signal peptidase   | High   | 5  | 1  | 1  | 1  | 226  | 25    | 8.57  | 31   | 108.1 | 101.4 | 106.2 | 90.4  | 96.1  | 97.7  |
| P63248 | <i>Pkia</i>      | cAMP-              | High   | 89 | 4  | 4  | 4  | 76   | 8     | 4.54  | 58   | 97.4  | 88.2  | 105.1 | 98.5  | 109.1 | 101.7 |

|        |                 |                   |        |    |    |    |    |      |       |       |      |       |       |       |       |       |       |
|--------|-----------------|-------------------|--------|----|----|----|----|------|-------|-------|------|-------|-------|-------|-------|-------|-------|
| P61208 | <i>Arl4c</i>    | ADP-ribosylation  | High   | 9  | 1  | 1  | 1  | 192  | 21.5  | 9.09  | 29   | 103.3 | 109   | 85.4  | 97.2  | 114   | 91    |
| Q9RON8 | <i>Syt6</i>     | Synaptotagmin-6   | Low    | 1  | 1  | 1  | 1  | 511  | 57.2  | 8.19  | 15   |       |       |       |       |       |       |
| Q3UVK0 | <i>Ermp1</i>    | Endoplasmic       | High   | 7  | 6  | 6  | 6  | 898  | 100.1 | 7.49  | 120  | 108.4 | 103.7 | 107.4 | 93.1  | 98.4  | 89    |
| Q3TKT4 | <i>Smarca4</i>  | Transcription     | High   | 4  | 6  | 6  | 3  | 1613 | 181.3 | 8     | 85   | 106.5 | 97.6  | 104.5 | 91.6  | 97.7  | 102.1 |
| Q8K1X1 | <i>Wdr11</i>    | WD repeat-        | High   | 6  | 7  | 7  | 7  | 1223 | 135.9 | 7.11  | 86   | 90.4  | 91.5  | 95.8  | 97.1  | 97.5  | 127.6 |
| Q9Z255 | <i>Ube2a</i>    | Ubiquitin-        | High   | 11 | 1  | 2  | 1  | 152  | 17.3  | 5.15  | 25   | 96.8  | 101.2 | 89.4  | 103.9 | 100   | 108.7 |
| P25976 | <i>Ubtf</i>     | Nucleolar         | High   | 12 | 8  | 10 | 8  | 765  | 89.5  | 5.76  | 157  | 97.7  | 93.9  | 98.1  | 104.1 | 96.4  | 109.8 |
| Q505D7 | <i>Opa3</i>     | Optic atrophy 3   | High   | 12 | 2  | 4  | 2  | 179  | 20.1  | 8.34  | 80   | 108.6 | 112.2 | 107.4 | 91.1  | 92.4  | 88.4  |
| O54941 | <i>Smarcae1</i> | SWI/SNF-related   | High   | 5  | 2  | 6  | 1  | 411  | 46.6  | 4.88  | 110  | 96.3  | 104.5 | 93.4  | 91.4  | 109.6 | 104.7 |
| Q91YN5 | <i>Uap1</i>     | UDP-N-            | High   | 8  | 2  | 2  | 2  | 522  | 58.6  | 6.49  | 62   | 95.8  | 88.1  | 100.3 | 111.2 | 94.9  | 109.8 |
| Q8BJS4 | <i>Sun2</i>     | SUN domain-       | High   | 3  | 2  | 2  | 2  | 731  | 81.6  | 7.02  | 27   | 102.5 | 103.9 | 97.5  | 102.4 | 99.1  | 94.5  |
| Q9DBS5 | <i>Klc4</i>     | Kinesin light     | High   | 11 | 5  | 6  | 1  | 619  | 68.6  | 6.09  | 130  | 96.7  | 92.9  | 99.4  | 105.3 | 102   | 103.7 |
| Q8VBT9 | <i>Aspscr1</i>  | Tether            | High   | 15 | 7  | 8  | 7  | 550  | 59.8  | 6.96  | 160  | 96.3  | 101.8 | 94.6  | 103.1 | 101.9 | 102.3 |
| Q9CPS6 | <i>Hint3</i>    | Histidine triad   | High   | 24 | 3  | 3  | 3  | 165  | 18.8  | 6.33  | 47   | 100.6 | 92    | 120.3 | 93.4  | 97.1  | 96.7  |
| Q5XJY4 | <i>Parl</i>     | Presenilins-      | Medium | 5  | 1  | 1  | 1  | 377  | 41.9  | 9.92  | 0    | 91.5  | 101.1 | 95.8  | 97.1  | 110.8 | 103.7 |
| Q80YX1 | <i>Tnc</i>      | Tenascin          | High   | 8  | 12 | 14 | 12 | 2110 | 231.7 | 4.89  | 177  | 93.6  | 84.5  | 107.4 | 95.8  | 111.1 | 107.5 |
| P47964 | <i>Rpl36</i>    | 60S ribosomal     | High   | 18 | 2  | 4  | 2  | 105  | 12.2  | 11.34 | 82   | 105.7 | 99.9  | 98.4  | 108.4 | 95.9  | 91.8  |
| Q80X82 | <i>Sympk</i>    | Symplekin         | High   | 1  | 2  | 2  | 2  | 1288 | 142.5 | 6.05  | 28   | 111.2 | 100.5 | 103.5 | 94.6  | 97.6  | 92.6  |
| P70296 | <i>Pebp1</i>    | Phosphatidyleth   | High   | 89 | 11 | 43 | 11 | 187  | 20.8  | 5.4   | 911  | 95    | 100.5 | 95.1  | 103.7 | 101   | 104.7 |
| Q9QUN9 | <i>Dkk3</i>     | Dickkopf-related  | High   | 9  | 2  | 2  | 2  | 349  | 38.4  | 4.54  | 48   | 106.9 | 107.2 | 110.2 | 91.5  | 88    | 96.2  |
| O35450 | <i>Fkbp1</i>    | FK506-binding     | Medium | 4  | 2  | 2  | 2  | 347  | 38.3  | 7.74  | 0    | 101.8 | 103   | 100.8 | 98.8  | 95.8  | 99.8  |
| Q8R180 | <i>Ero1a</i>    | ERO1-like         | High   | 6  | 2  | 2  | 2  | 464  | 54.1  | 6.54  | 59   | 99.2  | 96.6  | 88.1  | 97.9  | 110.8 | 107.4 |
| Q8K019 | <i>Bclaf1</i>   | Bcl-2-associated  | High   | 10 | 9  | 10 | 9  | 919  | 105.9 | 9.99  | 45   | 100.4 | 95.8  | 103.6 | 97.9  | 100   | 102.2 |
| Q69ZR2 | <i>Hectd1</i>   | E3 ubiquitin-     | High   | 4  | 8  | 9  | 8  | 2618 | 289.9 | 5.41  | 88   | 96.6  | 95.7  | 97.8  | 98.4  | 105.4 | 106   |
| Q99JY0 | <i>Hadhb</i>    | Trifunctional     | High   | 36 | 15 | 28 | 15 | 475  | 51.4  | 9.38  | 371  | 102.8 | 103.7 | 104.4 | 96.4  | 96.1  | 96.5  |
| Q99JW4 | <i>Lims1</i>    | LIM and           | High   | 12 | 3  | 4  | 3  | 325  | 37.2  | 8.05  | 120  | 114.4 | 101.9 | 120   | 88.9  | 85.5  | 89.3  |
| Q91YR1 | <i>Twf1</i>     | Twinfilin-1       | High   | 25 | 7  | 9  | 6  | 350  | 40.1  | 6.67  | 171  | 102.9 | 95.8  | 109.4 | 96.3  | 100.2 | 95.5  |
| Q78RX3 | <i>Smim12</i>   | Small integral    | High   | 9  | 1  | 1  | 1  | 92   | 10.8  | 9.04  | 29   | 101.3 | 105   | 89.4  | 104.7 | 101.5 | 98.1  |
| Q9D882 | <i>Fam241b</i>  | Protein           | High   | 11 | 1  | 3  | 1  | 120  | 13.1  | 11.41 | 25   | 88.4  | 93.6  | 90.2  | 103.6 | 111.1 | 113.1 |
| Q99MX7 | <i>Tmem121b</i> | Transmembrane     | High   | 17 | 6  | 7  | 6  | 572  | 58.1  | 9.01  | 92   | 96.6  | 94.4  | 96.8  | 106   | 102.8 | 103.5 |
| Q6NZC7 | <i>Sec23ip</i>  | SEC23-            | High   | 9  | 8  | 8  | 8  | 998  | 110.7 | 5.94  | 76   | 108.5 | 98.5  | 112.2 | 91.2  | 90.3  | 99.2  |
| Q91W96 | <i>Anapc4</i>   | Anaphase-         | High   | 4  | 2  | 2  | 2  | 807  | 91.6  | 5.4   | 45   | 93.3  | 98    | 91.2  | 92.1  | 98.7  | 126.7 |
| P97822 | <i>Anp32e</i>   | Acidic leucine-   | High   | 30 | 6  | 13 | 6  | 260  | 29.6  | 3.88  | 381  | 100   | 101.5 | 94.7  | 104   | 100.7 | 99.1  |
| P61327 | <i>Magoh</i>    | Protein mago      | High   | 42 | 5  | 6  | 5  | 146  | 17.2  | 6.11  | 52   | 101.8 | 100.1 | 95.1  | 98.9  | 102.1 | 101.9 |
| Q8CI95 | <i>Osbpl11</i>  | Oxysterol-        | High   | 4  | 2  | 2  | 1  | 751  | 83.6  | 7.01  | 32   |       |       |       |       |       |       |
| Q5PR73 | <i>Diras2</i>   | GTP-binding       | High   | 62 | 10 | 19 | 8  | 199  | 22.5  | 8.76  | 334  | 87.7  | 102.1 | 76.1  | 114.8 | 108.5 | 110.8 |
| Q9CQ56 | <i>Use1</i>     | Vesicle transport | High   | 9  | 2  | 2  | 2  | 270  | 30.6  | 9.11  | 58   | 100   | 103.1 | 109.5 | 95.8  | 94    | 97.6  |
| Q80WT5 | <i>Aftph</i>    | Aftiphilin        | Medium | 2  | 1  | 1  | 1  | 931  | 101.1 | 4.5   | 0    | 86.8  | 117.2 | 78.1  | 119   | 101.4 | 97.5  |
| Q3UH68 | <i>Limch1</i>   | LIM and calponin  | High   | 10 | 7  | 7  | 7  | 1057 | 118.1 | 5.48  | 105  | 97.1  | 99.6  | 107.1 | 96.7  | 97.1  | 102.3 |
| P82198 | <i>Tgfb1</i>    | Transforming      | High   | 2  | 1  | 1  | 1  | 683  | 74.6  | 7.06  | 24   |       |       |       |       |       |       |
| Q8K3J1 | <i>Ndufs8</i>   | NADH              | High   | 37 | 8  | 12 | 8  | 212  | 24    | 6.21  | 166  | 93.1  | 104.6 | 90.1  | 108.9 | 100.5 | 102.7 |
| Q05816 | <i>Fabp5</i>    | Fatty acid-       | High   | 66 | 7  | 16 | 7  | 135  | 15.1  | 6.54  | 373  | 102.8 | 101.3 | 113   | 92.3  | 95.4  | 95.2  |
| Q8BTY1 | <i>Kyat1</i>    | Kynurenine--      | High   | 5  | 2  | 2  | 1  | 424  | 47.5  | 6.95  | 35   |       |       |       |       |       |       |
| Q810B9 | <i>Slitrk3</i>  | SLIT and NTRK-    | Medium | 1  | 1  | 1  | 1  | 980  | 109.3 | 7.47  | 0    | 81.2  | 107.4 | 82.9  | 109.9 | 116.4 | 102.2 |
| Q64378 | <i>Fkbp5</i>    | Peptidyl-prolyl   | High   | 16 | 6  | 6  | 6  | 456  | 50.9  | 7.8   | 84   | 103.5 | 95.6  | 106.9 | 98.2  | 97.9  | 97.9  |
| Q3UR70 | <i>Tgfbrap1</i> | Transforming      | High   | 9  | 5  | 5  | 5  | 860  | 97.2  | 6.7   | 62   | 95.5  | 98.6  | 97.1  | 103.6 | 107.9 | 97.3  |
| P16406 | <i>Enpep</i>    | Glutamyl          | High   | 3  | 2  | 2  | 2  | 945  | 107.9 | 5.44  | 17   | 92.5  | 97.5  | 97.5  | 103.7 | 102.1 | 106.7 |
| P62754 | <i>Rps6</i>     | 40S ribosomal     | High   | 24 | 7  | 10 | 7  | 249  | 28.7  | 10.84 | 215  | 106.5 | 99    | 106.6 | 98.6  | 94.6  | 94.7  |
| Q8K182 | <i>C8a</i>      | Complement        | High   | 13 | 7  | 8  | 7  | 587  | 66    | 6.54  | 124  | 158.9 | 70.1  | 179.1 | 63.8  | 63.6  | 64.6  |
| Q09200 | <i>B4galnt1</i> | Beta-1,4 N-       | High   | 2  | 1  | 1  | 1  | 533  | 59.2  | 8.59  | 45   | 102.1 | 85.8  | 101.9 | 104.3 | 84.5  | 121.4 |
| P00397 | <i>Mtco1</i>    | Cytochrome c      | High   | 6  | 1  | 2  | 1  | 514  | 56.9  | 6.7   | 45   |       |       |       |       |       |       |
| Q9CWR0 | <i>Arhgef25</i> | Rho guanine       | High   | 4  | 2  | 2  | 1  | 618  | 68.2  | 5.29  | 53   | 92.6  | 93.9  | 96.3  | 106.4 | 106.9 | 103.9 |
| Q99L43 | <i>Cds2</i>     | Phosphatidate     | High   | 14 | 4  | 8  | 4  | 444  | 51.3  | 7.05  | 104  | 92.6  | 99    | 100.9 | 99.8  | 107.1 | 100.5 |
| Q9QZ06 | <i>Tollip</i>   | Toll-interacting  | High   | 45 | 8  | 12 | 8  | 274  | 30.3  | 5.17  | 198  | 91.8  | 98.8  | 89.9  | 110.1 | 103.7 | 105.7 |
| P62309 | <i>Snrpg</i>    | Small nuclear     | High   | 34 | 3  | 6  | 3  | 76   | 8.5   | 8.88  | 116  | 98.5  | 94.3  | 103.6 | 101.4 | 105   | 97.3  |
| Q3TBW2 | <i>Mrpl10</i>   | 39S ribosomal     | High   | 7  | 1  | 2  | 1  | 262  | 29.4  | 9.69  | 64   | 94.5  | 90    | 98.7  | 91    | 111.6 | 114.2 |
| P17225 | <i>Ptbp1</i>    | Polypyrimidine    | High   | 15 | 6  | 6  | 3  | 527  | 56.4  | 8.34  | 146  | 89.6  | 94.6  | 96.3  | 93    | 99.4  | 127   |
| Q60841 | <i>Reln</i>     | Reelin OS=Mus     | Medium | 0  | 1  | 1  | 1  | 3461 | 387.2 | 5.73  | 22   |       |       |       |       |       |       |
| Q6IFT4 | <i>Arhgap20</i> | Rho GTPase-       | High   | 1  | 1  | 1  | 1  | 1182 | 131.3 | 7.21  | 23   |       |       |       |       |       |       |
| P01837 | <i>Igkc</i>     | Immunoglobulin    | High   | 49 | 5  | 11 | 5  | 107  | 11.9  | 5.9   | 173  | 162.9 | 70.8  | 218   | 40    | 44.4  | 63.7  |
| Q9CZN4 | <i>Shisa9</i>   | Protein shisa-9   | High   | 6  | 2  | 3  | 2  | 424  | 46.8  | 8.62  | 40   | 87.2  | 100.5 | 96.9  | 99.3  | 105.3 | 110.9 |
| P55194 | <i>Sh3bp1</i>   | SH3 domain-       | High   | 10 | 5  | 7  | 5  | 680  | 74.1  | 6.6   | 127  | 101.1 | 108.9 | 101.9 | 99.5  | 93.4  | 95.1  |
| Q8VBZ3 | <i>Ciptm1</i>   | Cleft lip and     | High   | 9  | 4  | 6  | 4  | 664  | 75.2  | 6.3   | 136  | 94.2  | 100.5 | 100.9 | 101.1 | 103.4 | 99.9  |
| Q9DCU2 | <i>Plip</i>     | Plasmolipin       | Low    | 4  | 1  | 1  | 1  | 182  | 19.8  | 9.41  | 0    | 105.6 | 124.2 | 123.5 | 86.7  | 74.7  | 85.2  |
| Q8BKI2 | <i>Tnrc6b</i>   | Trinucleotide     | High   | 1  | 2  | 2  | 2  | 1810 | 191.8 | 6.3   | 24   | 94.7  | 99.1  | 94.9  | 111.5 | 97.7  | 102.1 |
| P06745 | <i>Gpi</i>      | Glucose-6-        | High   | 43 | 21 | 78 | 21 | 558  | 62.7  | 8.13  | 1478 | 99.7  | 100.1 | 99.6  | 98.2  | 102.8 | 99.5  |
| P32211 | <i>Chrm4</i>    | Muscarinic        | Medium | 1  | 1  | 1  | 1  | 479  | 52.9  | 9.88  | 14   | 89.6  | 97.6  | 91.2  | 106.3 | 105.2 | 110   |
| Q8BG73 | <i>Sh3bgrl2</i> | SH3 domain-       | High   | 31 | 2  | 3  | 2  | 107  | 12.2  | 5.55  | 34   | 104.1 | 98.4  | 102.2 | 100.5 | 94.6  | 100.3 |

|        |                |                   |        |    |     |     |     |      |       |       |      |       |       |       |       |       |       |
|--------|----------------|-------------------|--------|----|-----|-----|-----|------|-------|-------|------|-------|-------|-------|-------|-------|-------|
| A2AJ76 | <i>Hmcn2</i>   | Hemicentin-2      | Low    | 0  | 1   | 1   | 1   | 5100 | 546.9 | 5.71  | 0    | 98.9  | 104.2 | 90.3  | 103.2 | 102.3 | 101.1 |
| Q78K2  | <i>Atp5md</i>  | ATP synthase      | High   | 43 | 2   | 7   | 2   | 58   | 6.4   | 9.83  | 204  | 97.2  | 105.8 | 95.3  | 100.1 | 102.9 | 98.7  |
| P0C913 |                | Overexpressed     | High   | 35 | 1   | 1   | 1   | 63   | 6.4   | 6.57  | 27   | 84.5  | 105.5 | 95.5  | 99    | 110.6 | 105   |
| Q8BIZ1 | <i>Anks1b</i>  | Ankyrin repeat    | High   | 11 | 14  | 21  | 13  | 1259 | 139   | 6.29  | 245  | 94.6  | 95.9  | 90.8  | 109.2 | 104.7 | 104.7 |
| Q9R0P4 | <i>Smap</i>    | Small acidic      | High   | 33 | 5   | 5   | 5   | 181  | 20    | 4.82  | 51   | 103.2 | 94.1  | 103.1 | 97.2  | 104.8 | 97.8  |
| Q8BKR5 | <i>Ppp1r37</i> | Protein           | High   | 4  | 2   | 3   | 2   | 712  | 77.5  | 5.06  | 58   | 103.8 | 101.1 | 92.8  | 100.5 | 98.2  | 103.5 |
| P97772 | <i>Grm1</i>    | Metabotropic      | High   | 5  | 6   | 6   | 5   | 1199 | 133.1 | 6.86  | 80   | 101.4 | 96.1  | 109.9 | 97.2  | 98.7  | 96.8  |
| Q62261 | <i>Sptbn1</i>  | Spectrin beta     | High   | 66 | 135 | 323 | 130 | 2363 | 274.1 | 5.58  | 6181 | 98.6  | 98.4  | 96    | 102   | 102.9 | 102.2 |
| Q61464 | <i>Znf638</i>  | Zinc finger       | High   | 1  | 2   | 2   | 2   | 1960 | 218   | 6.89  | 21   |       |       |       |       |       |       |
| Q9WU42 | <i>Ncor2</i>   | Nuclear receptor  | High   | 1  | 1   | 1   | 1   | 2472 | 269.6 | 7.44  | 22   | 89.7  | 97.1  | 81.8  | 103.2 | 99.9  | 128.3 |
| B2RQC6 | <i>Cad</i>     | CAD protein       | High   | 6  | 11  | 12  | 11  | 2225 | 243.1 | 6.43  | 136  | 99.6  | 100.5 | 100.9 | 102.9 | 98.5  | 97.7  |
| Q35685 | <i>Nudc</i>    | Nuclear           | High   | 43 | 13  | 18  | 13  | 332  | 38.3  | 5.26  | 285  | 100.8 | 100.3 | 104.2 | 97    | 100.2 | 97.5  |
| Q8C180 | <i>Frs2</i>    | Fibroblast growth | Medium | 2  | 1   | 1   | 1   | 508  | 56.8  | 6.16  | 21   | 101.7 | 103.6 | 93.3  | 104.6 | 95.9  | 100.8 |
| Q8K0C9 | <i>Gmds</i>    | GDP-mannose       | High   | 33 | 9   | 11  | 9   | 372  | 42    | 7.03  | 157  | 98.6  | 99    | 97    | 97.1  | 102.3 | 106   |
| Q9EPL8 | <i>Ipo7</i>    | Importin-7        | High   | 22 | 19  | 29  | 19  | 1038 | 119.4 | 4.82  | 580  | 96    | 100.6 | 97.8  | 103.5 | 100.4 | 101.7 |
| Q6IFX2 | <i>Krt42</i>   | Keratin, type I   | High   | 5  | 2   | 2   | 2   | 452  | 50.1  | 5.16  | 43   | 55.9  | 69.8  | 77    | 122.9 | 49.1  | 225.3 |
| Q8BX10 | <i>Pgam5</i>   | Serine/threonine  | High   | 14 | 4   | 6   | 4   | 288  | 32    | 9.04  | 77   | 84.9  | 88    | 82.1  | 116   | 110.1 | 118.9 |
| Q91VI7 | <i>Rnh1</i>    | Ribonuclease      | High   | 51 | 16  | 22  | 16  | 456  | 49.8  | 4.78  | 430  | 102   | 104.9 | 119.1 | 88.9  | 89.3  | 95.9  |
| Q689Z5 | <i>Sbno1</i>   | Protein           | High   | 3  | 3   | 4   | 3   | 1390 | 153.6 | 8.07  | 64   | 95.3  | 101   | 92.7  | 103.6 | 103.4 | 104   |
| Q8BGY2 | <i>Eif5a2</i>  | Eukaryotic        | High   | 37 | 6   | 10  | 1   | 153  | 16.8  | 5.58  | 124  | 98.7  | 110.1 | 94.2  | 99.6  | 100   | 97.5  |
| Q9R099 | <i>Tbl2</i>    | Transducin beta-  | High   | 12 | 4   | 4   | 4   | 442  | 49.6  | 9.04  | 51   | 90.5  | 93.7  | 116.1 | 98.7  | 98.5  | 102.4 |
| Q9CQ02 | <i>Comm4</i>   | COMM domain-      | High   | 20 | 3   | 4   | 3   | 199  | 21.8  | 6.67  | 98   | 103.1 | 100.4 | 99.7  | 106.6 | 96.7  | 93.5  |
| Q8BGX3 | <i>Lrtm2</i>   | Leucine-rich      | High   | 4  | 1   | 2   | 1   | 370  | 41    | 6.4   | 49   | 90.7  | 92.2  | 96    | 106.2 | 103.2 | 111.7 |
| Q8CGQ8 | <i>Slc24a4</i> | Sodium/potassiu   | High   | 3  | 1   | 2   | 1   | 622  | 68.9  | 7.14  | 37   | 101   | 93.5  | 119.8 | 88.9  | 99.3  | 97.5  |
| Q9CQ69 | <i>Uqcrcq</i>  | Cytochrome b-c1   | High   | 48 | 4   | 6   | 4   | 82   | 9.8   | 10.26 | 83   | 97    | 106   | 89.5  | 103.1 | 103.5 | 100.9 |
| O35609 | <i>Scamp3</i>  | Secretory         | High   | 15 | 3   | 4   | 3   | 349  | 38.4  | 7.64  | 114  | 98.1  | 104.3 | 97.5  | 103.2 | 97.6  | 99.4  |
| Q9R226 | <i>Khdrbs3</i> | KH domain-        | High   | 17 | 6   | 11  | 5   | 346  | 38.8  | 8.1   | 103  | 95.1  | 100   | 91.5  | 107.9 | 106.6 | 98.8  |
| Q64343 | <i>Abcg1</i>   | ATP-binding       | Medium | 2  | 1   | 1   | 1   | 666  | 74    | 7.06  | 23   |       |       |       |       |       |       |
| P24529 | <i>Th</i>      | Tyrosine 3-       | Low    | 3  | 1   | 1   | 1   | 498  | 56    | 6.15  | 0    | 93.5  | 91.5  | 67.7  | 85.1  | 141.6 | 120.6 |
| P97379 | <i>G3bp2</i>   | Ras GTPase-       | High   | 25 | 10  | 12  | 10  | 482  | 54.1  | 5.62  | 153  | 97.9  | 97.7  | 99.3  | 104   | 102.4 | 98.7  |
| P63115 | <i>Slc7a10</i> | Asc-type amino    | Medium | 1  | 1   | 1   | 1   | 530  | 57.5  | 8.44  | 17   | 95.2  | 98.4  | 97.7  | 101.9 | 107.7 | 99.1  |
| Q9JMF3 | <i>Gng13</i>   | Guanine           | High   | 42 | 4   | 8   | 4   | 67   | 8     | 5.45  | 160  | 102.1 | 101.6 | 97    | 101.9 | 100.7 | 96.7  |
| A2A5R2 | <i>Arfgef2</i> | Brefeldin A-      | High   | 13 | 21  | 25  | 14  | 1792 | 202.1 | 6.55  | 330  | 94    | 101.5 | 95.6  | 102.1 | 100.8 | 105.9 |
| Q9R118 | <i>Htra1</i>   | Serine protease   | High   | 4  | 2   | 2   | 2   | 480  | 51.2  | 7.65  | 28   | 83.4  | 101.4 | 80.6  | 70.3  | 71.1  | 193.3 |
| Q3USB7 | <i>Picl1</i>   | Inactive          | High   | 19 | 16  | 20  | 16  | 1096 | 122.6 | 5.64  | 323  | 95.4  | 103.7 | 97    | 100.2 | 101.7 | 102   |
| Q6ZVW3 | <i>Rpl10</i>   | 60S ribosomal     | High   | 27 | 4   | 7   | 4   | 214  | 24.6  | 10.08 | 169  | 102.3 | 97.5  | 107.3 | 101.9 | 99.2  | 91.8  |
| Q9ER73 | <i>Elp4</i>    | Elongator         | High   | 11 | 4   | 5   | 4   | 422  | 46.3  | 8.78  | 135  | 96.6  | 103.4 | 97.8  | 99    | 94.9  | 108.3 |
| Q9DC40 | <i>Telo2</i>   | Telomere length   | Low    | 2  | 1   | 1   | 1   | 840  | 93.3  | 5.25  | 0    |       |       |       |       |       |       |
| Q6NVE9 | <i>Pptc7</i>   | Protein           | High   | 10 | 2   | 2   | 2   | 310  | 33    | 5.27  | 55   | 89.2  | 93.9  | 85    | 105.5 | 106.2 | 120.3 |
| P14115 | <i>Rpl27a</i>  | 60S ribosomal     | High   | 32 | 5   | 8   | 5   | 148  | 16.6  | 11.12 | 133  | 101.5 | 88.9  | 106.3 | 102.5 | 100.5 | 100.4 |
| Q91VD9 | <i>Ndufs1</i>  | NADH-             | High   | 67 | 35  | 85  | 35  | 727  | 79.7  | 5.72  | 1593 | 95.5  | 103.2 | 92.4  | 102.6 | 102.6 | 103.7 |
| Q71LX4 | <i>Tln2</i>    | Talin-2 OS=Mus    | High   | 37 | 64  | 85  | 54  | 2375 | 253.5 | 5.8   | 1806 | 96    | 98.7  | 94.5  | 103   | 103.8 | 104   |
| Q9JI78 | <i>Ngly1</i>   | Peptide-N(4)-(N-  | High   | 4  | 2   | 3   | 2   | 651  | 74.2  | 6.89  | 45   | 118.4 | 99.7  | 126.4 | 82.3  | 83.8  | 89.3  |
| P57716 | <i>Ncstn</i>   | Nicastrin         | High   | 9  | 6   | 7   | 6   | 708  | 78.4  | 6.09  | 195  | 100.3 | 101.2 | 103   | 96.2  | 97.1  | 102.2 |
| Q9WUZ9 | <i>Entpd5</i>  | Ectonucleoside    | High   | 4  | 1   | 1   | 1   | 427  | 47.1  | 5.29  | 48   |       |       |       |       |       |       |
| Q9D7N3 | <i>Mrps9</i>   | 28S ribosomal     | High   | 17 | 6   | 7   | 6   | 390  | 44.9  | 8.81  | 113  | 94.8  | 101.2 | 94.6  | 101.8 | 100.7 | 106.8 |
| P61164 | <i>Actr1a</i>  | Alpha-centractin  | High   | 38 | 12  | 32  | 7   | 376  | 42.6  | 6.64  | 568  | 95.9  | 99.9  | 97.2  | 102.1 | 102.5 | 102.4 |
| Q62059 | <i>Vcan</i>    | Versican core     | High   | 3  | 8   | 10  | 8   | 3357 | 366.6 | 4.64  | 169  | 95.5  | 110.9 | 91.2  | 103.3 | 95.1  | 104   |
| Q91XD6 | <i>Vps36</i>   | Vacuolar protein- | High   | 6  | 3   | 3   | 3   | 386  | 43.7  | 7.15  | 57   | 105.7 | 98.7  | 89.2  | 103.5 | 105.1 | 97.7  |
| Q9Z1S5 | <i>Septin3</i> | Neuronal-         | High   | 51 | 16  | 25  | 16  | 350  | 40    | 6.81  | 458  | 99.4  | 101.3 | 89.9  | 103.2 | 105.8 | 100.3 |
| Q8K274 | <i>Fn3krp</i>  | Ketosamine-3-     | High   | 29 | 8   | 9   | 8   | 309  | 34.4  | 7.87  | 188  | 97.9  | 104.5 | 96.9  | 102   | 99.7  | 99    |
| Q9ERI5 | <i>Jmjd6</i>   | Bifunctional      | Medium | 2  | 1   | 2   | 1   | 403  | 46.5  | 8.9   | 14   | 91.5  | 99.1  | 101.4 | 96.6  | 99.8  | 111.6 |
| Q9ESM3 | <i>Hapln2</i>  | Hyaluronan and    | Medium | 4  | 1   | 1   | 1   | 341  | 37.9  | 9.09  | 0    | 94.9  | 119.1 | 98.2  | 91    | 97.7  | 99.1  |
| Q8BHH2 | <i>Rab9b</i>   | Ras-related       | High   | 13 | 2   | 3   | 2   | 201  | 22.7  | 4.93  | 58   | 94.6  | 96.2  | 97.6  | 101.6 | 105.2 | 104.9 |
| Q60571 | <i>Crhbp</i>   | Corticotropin-    | Low    | 2  | 1   | 1   | 1   | 322  | 36    | 6.6   | 0    |       |       |       |       |       |       |
| Q60875 | <i>Arhgef2</i> | Rho guanine       | High   | 35 | 28  | 40  | 28  | 985  | 111.9 | 7.25  | 684  | 92.8  | 99.2  | 90    | 106.8 | 104.5 | 106.7 |
| P03987 |                | Ig gamma-3        | High   | 15 | 5   | 7   | 5   | 398  | 43.9  | 7.14  | 105  | 172.4 | 71.1  | 203.2 | 50.7  | 50.4  | 52.2  |
| O08989 | <i>Mras</i>    | Ras-related       | High   | 57 | 9   | 17  | 9   | 208  | 23.9  | 8.78  | 212  | 96.1  | 98.5  | 94.5  | 106.4 | 102   | 102.6 |
| Q9CY34 | <i>Ube2f</i>   | NEDD8-            | High   | 13 | 2   | 3   | 2   | 185  | 21.1  | 6.54  | 73   | 91.6  | 96.8  | 102.1 | 100.3 | 103.2 | 106   |
| Q8K215 | <i>Lyrn4</i>   | LYR motif-        | High   | 35 | 3   | 3   | 3   | 91   | 10.8  | 10.13 | 58   | 97.2  | 101.9 | 95.4  | 100.3 | 105.3 | 99.9  |
| P59041 | <i>Dnajc30</i> | DnaJ homolog      | High   | 9  | 1   | 1   | 1   | 219  | 24.7  | 10.21 | 38   |       |       |       |       |       |       |
| Q9ERV1 | <i>Mkrm2</i>   | Probable E3       | Medium | 3  | 1   | 1   | 1   | 416  | 46.6  | 7.34  | 23   | 97.7  | 109.6 | 105.3 | 95.9  | 93.1  | 98.3  |
| Q62219 | <i>Tgfb1i1</i> | Transforming      | High   | 3  | 1   | 1   | 1   | 461  | 50.1  | 6.73  | 38   | 93.1  | 97.6  | 103.8 | 114.6 | 102.9 | 88    |
| Q9R0L7 | <i>Akap8l</i>  | A-kinase anchor   | High   | 2  | 1   | 1   | 1   | 642  | 71.4  | 5.05  | 21   | 128.4 | 82    | 180   | 73.5  | 66.8  | 69.3  |
| Q9Z2U1 | <i>Pasma5</i>  | Proteasome        | High   | 46 | 9   | 18  | 9   | 241  | 26.4  | 4.79  | 446  | 101.9 | 100.2 | 98.9  | 99.4  | 100.9 | 98.7  |
| A2CG49 | <i>Kalrn</i>   | Kalirin OS=Mus    | High   | 15 | 38  | 44  | 28  | 2964 | 336.8 | 6.07  | 771  | 92.6  | 97.1  | 89.5  | 109.5 | 105.6 | 105.6 |
| Q148V7 | <i>Relch</i>   | RAB11-binding     | High   | 24 | 21  | 29  | 21  | 1216 | 134.5 | 5.34  | 346  | 94.2  | 99    | 90.4  | 105.6 | 104.4 | 106.4 |
| Q8CHY3 | <i>Dym</i>     | Dymeclin          | Medium | 1  | 1   | 1   | 1   | 669  | 75.8  | 5.77  | 0    |       |       |       |       |       |       |

|        |                  |                   |        |    |    |     |    |      |       |       |      |       |       |       |       |       |       |
|--------|------------------|-------------------|--------|----|----|-----|----|------|-------|-------|------|-------|-------|-------|-------|-------|-------|
| Q8VDV3 | <i>Rab3il1</i>   | Guanine           | High   | 3  | 1  | 1   | 1  | 383  | 42.7  | 6.38  | 34   | 119.9 | 101.7 | 112.7 | 89.2  | 86.1  | 90.4  |
| Q6PBQ8 | <i>Naa35</i>     | N-alpha-          | High   | 6  | 4  | 4   | 4  | 725  | 83.3  | 7.3   | 35   | 98.3  | 96.3  | 102.6 | 102.4 | 92.3  | 108.1 |
| Q6PB44 | <i>Ptpn23</i>    | Tyrosine-protein  | High   | 12 | 17 | 20  | 17 | 1692 | 185.1 | 6.8   | 197  | 100.1 | 98.3  | 94.2  | 103.3 | 100.8 | 103.2 |
| O88343 | <i>Slc4a4</i>    | Electrogenic      | High   | 21 | 17 | 28  | 16 | 1079 | 121.4 | 6.84  | 461  | 94.2  | 96.4  | 91.2  | 104.9 | 107.5 | 105.8 |
| P16054 | <i>Prkce</i>     | Protein kinase C  | High   | 29 | 23 | 37  | 22 | 737  | 83.5  | 7.03  | 564  | 93.9  | 95.1  | 94.2  | 103.6 | 105.2 | 108   |
| Q3JRS9 | <i>Ccdc51</i>    | Mitochondrial     | High   | 14 | 6  | 7   | 6  | 406  | 45.1  | 8.09  | 93   | 98.3  | 100.7 | 90.7  | 99.5  | 103.2 | 107.6 |
| Q5XJY5 | <i>Arcn1</i>     | Coatomer          | High   | 30 | 16 | 20  | 16 | 511  | 57.2  | 6.21  | 296  | 102.5 | 101.9 | 103.6 | 96.9  | 96.9  | 98.2  |
| Q8BWM0 | <i>Ptges2</i>    | Prostaglandin E   | High   | 26 | 7  | 11  | 7  | 384  | 43.3  | 9     | 196  | 99.2  | 101.7 | 92.4  | 103.9 | 102.3 | 100.4 |
| Q9D1E6 | <i>Tbcb</i>      | Tubulin-folding   | High   | 25 | 6  | 10  | 6  | 244  | 27.4  | 5.24  | 119  | 98.1  | 99.6  | 102.8 | 101.2 | 98.1  | 100.2 |
| Q9JLB2 | <i>Mpp5</i>      | MAGUK p55         | Medium | 2  | 1  | 1   | 1  | 675  | 77.2  | 6.09  | 0    | 108.5 | 91.6  | 117.5 | 91.2  | 91.8  | 99.4  |
| Q8BSF4 | <i>Pisd</i>      | Phosphatidylseri  | High   | 9  | 4  | 5   | 4  | 406  | 45.9  | 9.57  | 87   | 108.7 | 106.4 | 103.3 | 100.5 | 87.5  | 93.6  |
| P28740 | <i>Kif2a</i>     | Kinesin-like      | High   | 28 | 18 | 23  | 18 | 705  | 79.7  | 6.73  | 387  | 95.1  | 98.6  | 94.9  | 105.3 | 101.6 | 104.5 |
| Q91VT4 | <i>Cbr4</i>      | Carbonyl          | High   | 10 | 2  | 2   | 2  | 236  | 25.4  | 9.69  | 42   | 96.2  | 101.7 | 101.4 | 99.5  | 101.7 | 99.6  |
| Q8BG16 | <i>Slc6a15</i>   | Sodium-           | High   | 1  | 1  | 1   | 1  | 729  | 81.7  | 5.19  | 28   |       |       |       |       |       |       |
| Q9CYV5 | <i>Tmem135</i>   | Transmembrane     | High   | 5  | 2  | 2   | 2  | 458  | 52.3  | 9.5   | 31   | 94.6  | 103.4 | 91.1  | 94.3  | 103   | 113.7 |
| Q8R4H2 | <i>Arhgef12</i>  | Rho guanine       | High   | 8  | 10 | 11  | 10 | 1543 | 172.2 | 5.74  | 111  | 100.9 | 105.7 | 101.6 | 95.5  | 98.5  | 97.8  |
| Q3TLI0 | <i>Trappc10</i>  | Trafficking       | High   | 6  | 6  | 8   | 6  | 1259 | 141.5 | 5.96  | 138  | 101.9 | 100.2 | 94.6  | 107.4 | 97.4  | 98.5  |
| Q8BGP6 | <i>Slc25a40</i>  | Solute carrier    | High   | 7  | 2  | 2   | 2  | 337  | 37.9  | 8.95  | 23   | 102.5 | 105.8 | 109.2 | 97.7  | 93.8  | 91    |
| Q6P3D0 | <i>Nudt16</i>    | U8 snoRNA-        | High   | 16 | 3  | 5   | 3  | 195  | 21.8  | 7.12  | 114  | 93.1  | 93.4  | 97    | 102.9 | 108.1 | 105.4 |
| Q9QZB9 | <i>Dctn5</i>     | Dynactin subunit  | High   | 21 | 4  | 5   | 4  | 182  | 20.1  | 8.02  | 127  | 95.9  | 99    | 92.7  | 103.9 | 102   | 106.4 |
| Q99LB2 | <i>Dhrs4</i>     | Dehydrogenase/    | High   | 16 | 5  | 5   | 5  | 279  | 29.9  | 9.38  | 113  | 104.3 | 103.1 | 105.1 | 93.5  | 97.9  | 96.1  |
| Q80V42 | <i>Cpm</i>       | Carboxypeptidas   | High   | 14 | 4  | 5   | 4  | 443  | 50.5  | 7.78  | 75   | 94.9  | 112.9 | 96    | 99.8  | 99    | 97.4  |
| Q99104 | <i>Myo5a</i>     | Unconventional    | High   | 42 | 80 | 123 | 80 | 1853 | 215.4 | 8.63  | 1880 | 96.2  | 101.3 | 91.4  | 105.8 | 103.7 | 101.7 |
| O55033 | <i>Nck2</i>      | Cytoplasmic       | High   | 15 | 6  | 7   | 4  | 380  | 42.9  | 6.95  | 97   | 97    | 100.9 | 89.1  | 102.1 | 105.4 | 105.6 |
| Q810U4 | <i>Nrcam</i>     | Neuronal cell     | High   | 20 | 18 | 24  | 18 | 1256 | 138.4 | 5.91  | 477  | 97.8  | 96.9  | 94.6  | 104.1 | 101.9 | 104.6 |
| O70194 | <i>Eif3d</i>     | Eukaryotic        | High   | 25 | 8  | 10  | 8  | 548  | 63.9  | 6.05  | 159  | 98    | 92.3  | 101.5 | 104   | 95.1  | 109.1 |
| Q8CFI2 | <i>Cdc34</i>     | Ubiquitin-        | Low    | 5  | 1  | 1   | 1  | 235  | 26.6  | 4.56  | 0    | 102.6 | 106.5 | 91.7  | 102.7 | 103.1 | 93.4  |
| Q9D486 | <i>Cmip</i>      | C-Maf-inducing    | High   | 3  | 3  | 4   | 3  | 773  | 86.2  | 6.81  | 46   | 100.9 | 108.8 | 104.2 | 104.8 | 94    | 87.3  |
| Q8CIP4 | <i>Mark4</i>     | MAP/microtubule   | High   | 10 | 6  | 6   | 5  | 752  | 82.6  | 9.67  | 95   | 105.5 | 92.9  | 96.9  | 105.8 | 98.8  | 100.2 |
| Q9DAU1 | <i>Cnpy3</i>     | Protein canopy    | High   | 25 | 6  | 7   | 6  | 276  | 30.5  | 5.62  | 111  | 100.5 | 101   | 101.6 | 100.4 | 98.2  | 98.2  |
| Q8K268 | <i>Abcf3</i>     | ATP-binding       | High   | 5  | 3  | 3   | 3  | 709  | 79.8  | 6.16  | 31   | 101.9 | 94.8  | 94    | 107.1 | 106   | 96.2  |
| Q9CQT7 | <i>Desi1</i>     | Desumoylating     | Medium | 5  | 1  | 1   | 1  | 168  | 18.4  | 4.94  | 26   |       |       |       |       |       |       |
| Q8BFU3 | <i>Rnf214</i>    | RING finger       | High   | 10 | 5  | 5   | 5  | 668  | 73.6  | 6.23  | 113  | 91.8  | 103.5 | 83.1  | 103.7 | 112.6 | 105.3 |
| Q9DB20 | <i>Atp5po</i>    | ATP synthase      | High   | 60 | 11 | 38  | 11 | 213  | 23.3  | 9.99  | 637  | 97.4  | 103.3 | 93.6  | 101.6 | 102.4 | 101.8 |
| Q8CGS6 | <i>Polq</i>      | DNA polymerase    | Low    | 0  | 1  | 1   | 1  | 2544 | 280.5 | 7.34  | 0    |       |       |       |       |       |       |
| P62843 | <i>Rps15</i>     | 40S ribosomal     | High   | 21 | 2  | 3   | 2  | 145  | 17    | 10.39 | 28   | 104   | 103.4 | 106.4 | 99.8  | 93.9  | 92.5  |
| Q9D1I5 | <i>Mcee</i>      | Methylmalonyl-    | High   | 14 | 2  | 2   | 2  | 178  | 19    | 9.09  | 20   | 95.3  | 91.2  | 92.6  | 99.2  | 114.5 | 107.2 |
| Q9R0L6 | <i>Pcm1</i>      | Pericentriolar    | High   | 2  | 3  | 3   | 3  | 2025 | 228.7 | 5.01  | 42   |       |       |       |       |       |       |
| Q8BG58 | <i>P4htm</i>     | Transmembrane     | High   | 7  | 2  | 2   | 2  | 503  | 57    | 6.09  | 43   | 86    | 99.7  | 90.2  | 102.4 | 99.8  | 122   |
| Q99KN1 | <i>Aradc1</i>    | Arrestin domain-  | Low    | 2  | 1  | 1   | 1  | 434  | 46.3  | 7.21  | 16   |       |       |       |       |       |       |
| O35943 | <i>Fxn</i>       | Fratxin,          | High   | 11 | 2  | 2   | 2  | 207  | 22.9  | 8.02  | 62   | 95.8  | 95.1  | 95.8  | 103.9 | 105.6 | 103.8 |
| O88454 | <i>Kcnk4</i>     | Potassium         | High   | 3  | 1  | 1   | 1  | 398  | 43    | 9.19  | 24   | 102.7 | 102.9 | 88    | 110.9 | 99.8  | 95.7  |
| Q9DCA2 | <i>Mrps11</i>    | 28S ribosomal     | Low    | 5  | 1  | 1   | 1  | 191  | 20.2  | 10.77 | 0    | 89.6  | 96.1  | 97.4  | 101.8 | 112.7 | 102.4 |
| Q9CQE1 | <i>Nipsnap3b</i> | Protein NipSnap   | High   | 15 | 2  | 3   | 2  | 247  | 28.3  | 9.48  | 119  | 94    | 94.8  | 98.7  | 97.8  | 105.3 | 109.4 |
| P49070 | <i>Camlg</i>     | Calcium signal-   | High   | 15 | 3  | 3   | 3  | 294  | 32.5  | 7.74  | 85   | 98.7  | 95    | 97    | 100.6 | 105.1 | 103.7 |
| O55028 | <i>Bckdk</i>     | [3-methyl-2-      | High   | 7  | 2  | 2   | 2  | 412  | 46.6  | 8.91  | 30   | 97.4  | 99.8  | 86.5  | 107.8 | 103.3 | 105.2 |
| Q99PP7 | <i>Trim33</i>    | E3 ubiquitin-     | High   | 2  | 2  | 2   | 2  | 1142 | 123.8 | 6.74  | 27   | 99.3  | 103   | 88.6  | 97    | 102.6 | 109.5 |
| P43275 | <i>H1-1</i>      | Histone H1.1      | High   | 30 | 6  | 12  | 4  | 213  | 21.8  | 10.93 | 153  | 108   | 91.4  | 134   | 83.9  | 93.7  | 89    |
| P51879 | <i>Ocm</i>       | Oncomodulin       | Medium | 26 | 1  | 1   | 1  | 109  | 12.3  | 4.17  | 21   |       |       |       |       |       |       |
| Q9JLK7 | <i>Cabp1</i>     | Calcium-binding   | High   | 10 | 2  | 2   | 2  | 227  | 25.9  | 4.93  | 48   |       |       |       |       |       |       |
| Q9JKK7 | <i>Tmod2</i>     | Tropomodulin-2    | High   | 49 | 15 | 34  | 14 | 351  | 39.5  | 5.35  | 624  | 94.8  | 100.6 | 98    | 103   | 101   | 102.6 |
| Q61701 | <i>Elavl4</i>    | ELAV-like         | High   | 36 | 12 | 19  | 4  | 385  | 42.3  | 9.38  | 403  | 101.8 | 101.4 | 95.4  | 100.4 | 102.7 | 98.2  |
| Q922U1 | <i>Prpf3</i>     | U4/U6 small       | High   | 3  | 2  | 2   | 2  | 683  | 77.4  | 9.5   | 0    | 98.5  | 101.4 | 97.3  | 104.8 | 97.3  | 100.6 |
| P97315 | <i>Csrp1</i>     | Cysteine and      | High   | 56 | 8  | 13  | 8  | 193  | 20.6  | 8.57  | 318  | 108.4 | 102.4 | 117.3 | 94.6  | 87.5  | 89.9  |
| Q08274 | <i>Dmwd</i>      | Dystrophia        | High   | 6  | 3  | 4   | 3  | 665  | 69.8  | 7.24  | 56   | 93.4  | 97.3  | 97.3  | 110.1 | 102.6 | 99.4  |
| P31648 | <i>Slc6a1</i>    | Sodium- and       | High   | 15 | 6  | 13  | 6  | 599  | 67    | 7.96  | 157  | 92.7  | 103   | 86.6  | 109.9 | 103.6 | 104.2 |
| Q3THE2 | <i>Myl12b</i>    | Myosin            | High   | 50 | 6  | 16  | 2  | 172  | 19.8  | 4.84  | 478  | 102.3 | 98.8  | 99.8  | 99.8  | 100.1 | 99.3  |
| P07214 | <i>Sparc</i>     | SPARC OS=Mus      | High   | 5  | 1  | 2   | 1  | 302  | 34.4  | 4.86  | 54   | 93.3  | 105.9 | 105.8 | 83.9  | 110   | 101.1 |
| Q61885 | <i>Mog</i>       | Myelin-           | High   | 34 | 10 | 21  | 10 | 246  | 28.3  | 7.96  | 306  | 96.1  | 118.7 | 101.8 | 96.2  | 93.6  | 93.5  |
| Q9DAW6 | <i>Prpf4</i>     | U4/U6 small       | High   | 13 | 5  | 5   | 5  | 521  | 58.3  | 7.28  | 15   | 92.7  | 102.7 | 97.3  | 104.3 | 102.2 | 100.7 |
| P43247 | <i>Msh2</i>      | DNA mismatch      | High   | 1  | 1  | 2   | 1  | 935  | 104.1 | 5.96  | 129  | 98.1  | 105.5 | 113.8 | 89.4  | 92.5  | 100.7 |
| Q8BT60 | <i>Cpne3</i>     | Copine-3          | High   | 12 | 5  | 8   | 3  | 533  | 59.5  | 5.78  | 104  | 98    | 102.2 | 108   | 90    | 98.9  | 102.9 |
| P16460 | <i>Ass1</i>      | Argininosuccinat  | High   | 34 | 13 | 18  | 13 | 412  | 46.6  | 8.22  | 172  | 100.4 | 102.4 | 112.5 | 90.4  | 96.5  | 97.9  |
| Q80X90 | <i>Flnb</i>      | Filamin-B         | High   | 8  | 16 | 20  | 13 | 2602 | 277.7 | 5.71  | 214  | 106.3 | 106   | 112.1 | 90    | 90.8  | 94.8  |
| Q8R4E6 | <i>Purg</i>      | Purine-rich       | High   | 28 | 10 | 13  | 9  | 350  | 39.9  | 9.51  | 207  | 89.4  | 88.8  | 88.5  | 116.8 | 111.8 | 104.7 |
| Q9D1X0 | <i>No13</i>      | Nucleolar protein | High   | 20 | 3  | 3   | 3  | 220  | 24.6  | 4.07  | 95   | 100.5 | 101   | 98.3  | 97.1  | 100.4 | 102.7 |
| Q99KN9 | <i>Clint1</i>    | Clathrin          | High   | 16 | 10 | 13  | 10 | 631  | 68.5  | 6.25  | 95   | 101   | 97.2  | 103.2 | 99    | 100.1 | 99.4  |
| P62830 | <i>Rpl23</i>     | 60S ribosomal     | High   | 55 | 7  | 18  | 7  | 140  | 14.9  | 10.51 | 366  | 102.6 | 99.4  | 103.7 | 100.4 | 98.6  | 95.4  |

|        |                  |                   |        |    |    |     |    |      |       |       |      |       |       |       |       |       |       |
|--------|------------------|-------------------|--------|----|----|-----|----|------|-------|-------|------|-------|-------|-------|-------|-------|-------|
| Q8CAA7 | <i>Pgm211</i>    | Glucose 1,6-      | High   | 38 | 22 | 30  | 22 | 621  | 70.2  | 6.49  | 413  | 95.1  | 98.4  | 89.2  | 106.4 | 106.3 | 104.6 |
| Q99KH8 | <i>Stk24</i>     | Serine/threonine  | High   | 17 | 6  | 10  | 2  | 431  | 47.9  | 5.43  | 180  | 99.2  | 89.5  | 107.3 | 101.6 | 95.5  | 106.9 |
| Q9QZE7 | <i>Tsnax</i>     | Translin-         | High   | 46 | 11 | 13  | 11 | 290  | 32.9  | 6.55  | 325  | 94.6  | 96.9  | 101.4 | 108.1 | 100   | 99    |
| Q3UU96 | <i>Cdc42bpa</i>  | Serine/threonine  | High   | 6  | 9  | 9   | 7  | 1719 | 195.4 | 6.51  | 106  | 95.2  | 100   | 94.8  | 101.3 | 104.7 | 104   |
| Q00898 | <i>Serpina1e</i> | Alpha-1-          | High   | 30 | 12 | 43  | 4  | 413  | 45.9  | 5.73  | 773  | 186.8 | 58.5  | 244.3 | 33.7  | 39    | 37.8  |
| Q9QXT0 | <i>Cnpy2</i>     | Protein canopy    | High   | 20 | 3  | 4   | 3  | 182  | 20.8  | 5.07  | 82   | 104.9 | 100.1 | 108.3 | 93.4  | 97.2  | 96.1  |
| Q8BGQ7 | <i>Aars1</i>     | Alanine--tRNA     | High   | 43 | 30 | 47  | 30 | 968  | 106.8 | 5.67  | 1050 | 102.2 | 99.8  | 97.4  | 99.6  | 98.6  | 102.3 |
| P31361 | <i>Pou3f3</i>    | POU domain,       | Medium | 2  | 1  | 1   | 1  | 497  | 50.2  | 7.87  | 20   |       |       |       |       |       |       |
| Q3TLS3 | <i>Gdpgp1</i>    | GDP-D-glucose     | High   | 26 | 6  | 7   | 6  | 386  | 42.5  | 6.19  | 65   | 95.9  | 97.8  | 90    | 105.1 | 106.3 | 105   |
| Q8BIG7 | <i>Comtd1</i>    | Catechol O-       | High   | 21 | 4  | 6   | 4  | 262  | 28.9  | 8.32  | 125  | 99.6  | 96.8  | 100.7 | 101.8 | 101.3 | 99.7  |
| O35239 | <i>Ptpn9</i>     | Tyrosine-protein  | High   | 10 | 6  | 8   | 6  | 593  | 67.9  | 8.1   | 89   | 101.6 | 97.2  | 100.4 | 101.5 | 99.8  | 99.4  |
| Q8BLK9 | <i>Rps6kc1</i>   | Ribosomal         | High   | 4  | 3  | 3   | 3  | 1056 | 115.6 | 4.89  | 0    | 100.5 | 102.4 | 103.2 | 97.5  | 94.4  | 101.9 |
| Q91WU5 | <i>As3mt</i>     | Arsenite          | High   | 12 | 3  | 3   | 3  | 376  | 41.8  | 5.86  | 61   | 101.2 | 107.8 | 104.2 | 91.2  | 100.5 | 95.1  |
| Q8CHC4 | <i>Synj1</i>     | Synaptotagmin-1   | High   | 37 | 45 | 85  | 45 | 1574 | 172.5 | 6.89  | 1524 | 98    | 99.1  | 94.4  | 100.8 | 105.7 | 102   |
| P36993 | <i>Ppm1b</i>     | Protein           | High   | 18 | 5  | 7   | 5  | 390  | 42.8  | 5.19  | 128  | 97.4  | 99.6  | 99.1  | 100.1 | 103.2 | 100.5 |
| Q3UUQ7 | <i>Pgap1</i>     | GPI inositol-     | High   | 5  | 5  | 6   | 5  | 922  | 104.5 | 8.91  | 69   | 99.7  | 95.7  | 99.4  | 97.7  | 103.1 | 104.3 |
| Q811D0 | <i>Dlg1</i>      | Disks large       | High   | 28 | 22 | 33  | 17 | 905  | 100.1 | 5.8   | 672  | 97    | 99.3  | 91    | 103.8 | 103.5 | 105.4 |
| P47757 | <i>Capzb</i>     | F-actin-capping   | High   | 46 | 14 | 26  | 14 | 277  | 31.3  | 5.74  | 405  | 101.8 | 99.3  | 107.4 | 97.1  | 97.3  | 97.1  |
| Q9EQT6 | <i>Syt13</i>     | Synaptotagmin-    | High   | 7  | 2  | 2   | 2  | 426  | 46.8  | 7.53  | 38   | 100.8 | 102.2 | 98    | 96.2  | 101.7 | 101.1 |
| Q9DB75 | <i>Cdip1</i>     | Cell death-       | Medium | 3  | 1  | 1   | 1  | 208  | 21.8  | 5.66  | 20   | 93.1  | 97.4  | 116   | 110.3 | 88.1  | 95.1  |
| Q9WTK3 | <i>Gpaal1</i>    | Glycosylphospha   | Medium | 2  | 1  | 1   | 1  | 621  | 67.9  | 8.4   | 0    | 97.7  | 103.2 | 113.5 | 99.5  | 95.1  | 91.1  |
| Q9DD02 | <i>Hikeshi</i>   | Protein Hikeshi   | High   | 7  | 1  | 2   | 1  | 197  | 21.6  | 5.45  | 27   | 102.5 | 105.3 | 101.6 | 106.2 | 99.6  | 84.8  |
| Q8K1A6 | <i>Cc2d1a</i>    | Coiled-coil and   | High   | 8  | 6  | 6   | 6  | 943  | 103.6 | 7.84  | 94   | 91.3  | 99.5  | 94.1  | 105.2 | 104.4 | 105.6 |
| P40237 | <i>Cd82</i>      | CD82 antigen      | High   | 12 | 3  | 4   | 3  | 266  | 29.6  | 5.02  | 67   | 99.4  | 126.7 | 113   | 82.7  | 88.1  | 90.1  |
| Q8BML4 | <i>Gen1</i>      | Flap              | Low    | 2  | 1  | 1   | 1  | 908  | 101.7 | 7.65  | 0    |       |       |       |       |       |       |
| Q91X58 | <i>Zfand2b</i>   | AN1-type zinc     | High   | 7  | 1  | 1   | 1  | 257  | 27.9  | 6.93  | 22   |       |       |       |       |       |       |
| Q402B2 | <i>Wdr93</i>     | WD repeat-        | Medium | 2  | 1  | 1   | 1  | 695  | 78.9  | 6.6   | 0    |       |       |       |       |       |       |
| Q3TIU4 | <i>Pde12</i>     | 2',5'-            | High   | 3  | 2  | 2   | 2  | 608  | 67.5  | 6.92  | 36   | 92    | 95.8  | 94.2  | 105   | 106.6 | 106.4 |
| Q07417 | <i>Acads</i>     | Short-chain       | High   | 18 | 7  | 11  | 7  | 412  | 44.9  | 8.47  | 87   | 104.9 | 100.5 | 106.8 | 94.6  | 94    | 99.2  |
| Q9CWE0 | <i>Mtfr11</i>    | Mitochondrial     | High   | 24 | 4  | 4   | 4  | 289  | 31.7  | 6.1   | 73   | 98.5  | 99.6  | 99.3  | 103   | 103.7 | 96.1  |
| Q9DBG6 | <i>Rpn2</i>      | Dolichyl-         | High   | 30 | 15 | 19  | 15 | 631  | 69    | 5.81  | 509  | 102.6 | 100.2 | 102.5 | 94.9  | 94.8  | 105   |
| P59326 | <i>Ythdf1</i>    | YTH domain-       | High   | 4  | 2  | 2   | 1  | 559  | 60.8  | 8.95  | 46   |       |       |       |       |       |       |
| Q61233 | <i>Lcp1</i>      | Plastin-2         | High   | 35 | 18 | 29  | 15 | 627  | 70.1  | 5.33  | 297  | 131.3 | 103.5 | 172.5 | 60.5  | 62.9  | 69.3  |
| Q6PEE2 | <i>Ctif</i>      | CBP80/20-         | High   | 3  | 1  | 1   | 1  | 600  | 67.8  | 6.65  | 62   | 100.5 | 104.8 | 104.4 | 97.7  | 81.2  | 111.3 |
| Q60900 | <i>Elavl3</i>    | ELAV-like         | High   | 34 | 10 | 14  | 6  | 367  | 39.5  | 9.28  | 271  | 99    | 100.3 | 103.4 | 104.4 | 95.2  | 97.7  |
| P01726 |                  | Ig lambda-1       | Medium | 7  | 1  | 1   | 1  | 129  | 13.5  | 5.78  | 24   | 142   | 80.4  | 169.2 | 55.7  | 73    | 79.8  |
| Q8C1D8 | <i>Iws1</i>      | Protein IWS1      | Medium | 2  | 1  | 1   | 1  | 766  | 85.2  | 4.67  | 27   |       |       |       |       |       |       |
| Q91Y86 | <i>Mapk8</i>     | Mitogen-          | High   | 20 | 7  | 12  | 2  | 384  | 44.2  | 7.69  | 174  | 96.5  | 109.9 | 85.4  | 102.9 | 104.9 | 100.5 |
| Q6PHU5 | <i>Sort1</i>     | Sortilin OS=Mus   | High   | 9  | 6  | 8   | 6  | 825  | 91.1  | 5.88  | 96   | 96.7  | 98.8  | 95.1  | 106.1 | 100   | 103.3 |
| Q9CRC9 | <i>Gnpda2</i>    | Glucosamine-6-    | High   | 40 | 8  | 9   | 6  | 276  | 31.1  | 6.9   | 172  | 98.8  | 102.1 | 92.5  | 104   | 102.9 | 99.6  |
| Q8R071 | <i>Itpka</i>     | Inositol-         | High   | 48 | 16 | 25  | 16 | 459  | 50.9  | 7.72  | 343  | 91.6  | 99.6  | 94.6  | 104.6 | 101.3 | 108.3 |
| Q8JZM7 | <i>Cdc73</i>     | Parafibromin      | High   | 4  | 2  | 2   | 2  | 531  | 60.5  | 9.61  | 23   | 101.8 | 104.7 | 106.9 | 94.7  | 99    | 93    |
| P31324 | <i>Prkar2b</i>   | cAMP-             | High   | 45 | 14 | 44  | 12 | 416  | 46.1  | 4.98  | 873  | 92.3  | 95.2  | 83.9  | 108.6 | 109.3 | 110.6 |
| P62331 | <i>Arf6</i>      | ADP-ribosylation  | High   | 38 | 5  | 11  | 4  | 175  | 20.1  | 8.95  | 259  | 100.3 | 102.9 | 96.8  | 101.2 | 99.7  | 99.2  |
| Q8K409 | <i>Polb</i>      | DNA polymerase    | High   | 5  | 2  | 2   | 2  | 335  | 38.3  | 8.85  | 31   | 97.7  | 98.1  | 83.8  | 116   | 99.3  | 105   |
| Q9D1D4 | <i>Tmed10</i>    | Transmembrane     | High   | 32 | 5  | 15  | 5  | 219  | 24.9  | 6.7   | 265  | 101.6 | 103.9 | 100.7 | 97.6  | 98.9  | 97.4  |
| Q91VR7 | <i>Map1lc3a</i>  | Microtubule-      | High   | 23 | 3  | 8   | 1  | 121  | 14.3  | 8.68  | 112  | 90.1  | 105.1 | 81.8  | 114.6 | 106.1 | 102.3 |
| Q8BJZ4 | <i>Mmps35</i>    | 28S ribosomal     | High   | 7  | 2  | 3   | 2  | 320  | 36    | 8.59  | 37   | 100.9 | 102.5 | 94.3  | 103.3 | 102.7 | 96.2  |
| P01027 | <i>C3</i>        | Complement C3     | High   | 41 | 59 | 89  | 59 | 1663 | 186.4 | 6.73  | 1277 | 175.9 | 74.8  | 195.8 | 49.3  | 51    | 53.2  |
| Q9QZW0 | <i>Atp11c</i>    | Phospholipid-     | High   | 2  | 1  | 1   | 1  | 1129 | 129.2 | 7.3   | 60   | 93.5  | 100.8 | 109.2 | 97.7  | 105.7 | 93.1  |
| Q9JMD3 | <i>Stard10</i>   | START domain-     | High   | 11 | 3  | 3   | 3  | 291  | 32.9  | 7.12  | 49   | 103.3 | 102.9 | 104.7 | 102.2 | 101.7 | 85.1  |
| P63141 | <i>Kcna2</i>     | Potassium         | High   | 18 | 8  | 13  | 4  | 499  | 56.7  | 4.86  | 235  | 96.3  | 106   | 86.4  | 112.9 | 100.2 | 98.2  |
| D3Z7P3 | <i>Gls</i>       | Glutaminase       | High   | 41 | 20 | 58  | 19 | 674  | 73.9  | 7.99  | 964  | 94.9  | 102.1 | 85    | 108.4 | 105.5 | 104.1 |
| Q6DIC0 | <i>Smarca2</i>   | Probable global   | High   | 7  | 9  | 9   | 6  | 1577 | 180.1 | 7.2   | 116  | 95    | 94.8  | 100.2 | 96.6  | 100.9 | 112.4 |
| Q9QXL8 | <i>Nme7</i>      | Nucleoside        | High   | 6  | 2  | 3   | 2  | 395  | 44.4  | 7.12  | 26   | 94.1  | 98.6  | 93.4  | 98.6  | 103.5 | 111.9 |
| B2RWW0 | <i>Tagap</i>     | T-cell activation | Low    | 2  | 1  | 1   | 1  | 714  | 78.9  | 6.67  | 0    |       |       |       |       |       |       |
| Q99K70 | <i>Rragc</i>     | Ras-related       | High   | 20 | 5  | 6   | 5  | 398  | 44.1  | 5.1   | 109  | 99.3  | 102.2 | 94.6  | 100.5 | 99    | 104.5 |
| Q8BVQ5 | <i>Ppme1</i>     | Protein           | High   | 37 | 12 | 16  | 12 | 386  | 42.2  | 5.97  | 327  | 93.4  | 107.9 | 85.3  | 107.9 | 100.1 | 105.4 |
| Q8VCB2 | <i>Med25</i>     | Mediator of RNA   | Medium | 2  | 1  | 1   | 1  | 745  | 78.1  | 8.34  | 0    |       |       |       |       |       |       |
| Q924T7 | <i>Rnf31</i>     | E3 ubiquitin-     | High   | 5  | 4  | 5   | 4  | 1066 | 119.2 | 6.52  | 79   | 94.1  | 104.2 | 96.4  | 102.1 | 97.5  | 105.7 |
| Q9QYR6 | <i>Map1a</i>     | Microtubule-      | High   | 46 | 96 | 172 | 95 | 2776 | 300   | 5     | 2769 | 95    | 103.4 | 88.1  | 106.9 | 103.4 | 103.3 |
| Q9D4H1 | <i>Exoc2</i>     | Exocyst complex   | High   | 22 | 17 | 18  | 17 | 924  | 103.9 | 7.18  | 244  | 98.3  | 100.7 | 98.7  | 100.1 | 101.7 | 100.4 |
| Q9JL62 | <i>Gltp</i>      | Glycolipid        | High   | 31 | 6  | 11  | 6  | 209  | 23.7  | 7.39  | 193  | 99    | 118.7 | 103.8 | 94.2  | 90.7  | 93.6  |
| Q80W22 | <i>Thnsl2</i>    | Threonine         | High   | 4  | 1  | 1   | 1  | 483  | 54.2  | 6.39  | 29   | 97    | 99.7  | 89.4  | 95.1  | 105.5 | 113.2 |
| Q9QXA5 | <i>Lsm4</i>      | U6 snRNA-         | High   | 15 | 2  | 3   | 2  | 137  | 15.1  | 10.05 | 91   | 121.4 | 95.6  | 99.7  | 90.9  | 97.4  | 95.2  |
| Q91Z61 | <i>Diras1</i>    | GTP-binding       | High   | 35 | 7  | 9   | 5  | 198  | 22.3  | 8.9   | 198  | 94.8  | 98.9  | 93.3  | 107.8 | 101.3 | 103.9 |
| Q91Y63 | <i>Slc13a3</i>   | Solute carrier    | High   | 4  | 2  | 4   | 2  | 600  | 66.1  | 7.72  | 44   | 97    | 96.6  | 84.6  | 92.2  | 84.8  | 144.9 |
| P33173 | <i>Kif1a</i>     | Kinesin-like      | High   | 20 | 29 | 38  | 24 | 1695 | 191.6 | 6.2   | 619  | 96.5  | 98.2  | 96.1  | 103   | 103.5 | 102.8 |

|        |                 |                  |        |    |    |     |    |      |       |       |      |       |       |       |       |       |       |
|--------|-----------------|------------------|--------|----|----|-----|----|------|-------|-------|------|-------|-------|-------|-------|-------|-------|
| Q61166 | <i>Mapre1</i>   | Microtubule-     | High   | 33 | 7  | 13  | 6  | 268  | 30    | 5.22  | 271  | 102.7 | 97.3  | 103   | 98.5  | 100.7 | 97.7  |
| P47811 | <i>Mapk14</i>   | Mitogen-         | Medium | 2  | 1  | 1   | 1  | 360  | 41.3  | 5.88  | 0    | 107.8 | 95.4  | 117.5 | 89.4  | 93.6  | 96.2  |
| Q8CFB4 | <i>Gbp5</i>     | Guanylate-       | High   | 2  | 1  | 1   | 1  | 590  | 66.9  | 6.09  | 29   | 116.7 | 107.3 | 183.6 | 71.5  | 62    | 58.9  |
| Q8CH77 | <i>Nav1</i>     | Neuron           | High   | 2  | 4  | 4   | 4  | 1875 | 202.2 | 8.06  | 43   | 95.2  | 92    | 92    | 108.2 | 106.8 | 105.8 |
| Q9JMG7 | <i>Hdgfl3</i>   | Hepatoma-        | High   | 24 | 5  | 11  | 4  | 202  | 22.4  | 8.4   | 139  | 100.6 | 89.2  | 106.5 | 101   | 102.7 | 100   |
| P45481 | <i>Crebbp</i>   | Histone lysine   | High   | 1  | 2  | 2   | 2  | 2441 | 265.3 | 8.54  | 40   | 94.2  | 100.5 | 89.3  | 116.3 | 93.5  | 106.3 |
| Q6A009 | <i>Ltn1</i>     | E3 ubiquitin-    | Low    | 0  | 1  | 1   | 1  | 1767 | 198.8 | 6.55  | 14   |       |       |       |       |       |       |
| Q9DBH0 | <i>Wwp2</i>     | NEDD4-like E3    | High   | 2  | 1  | 1   | 1  | 870  | 98.7  | 7.11  | 33   | 101.5 | 80.3  | 99.2  | 97.2  | 87.1  | 134.7 |
| O35129 | <i>Phb2</i>     | Prohibitin-2     | High   | 58 | 16 | 27  | 16 | 299  | 33.3  | 9.83  | 368  | 95.9  | 101.4 | 89.3  | 106.9 | 104.4 | 102.1 |
| Q8BH43 | <i>Wasf2</i>    | Wiskott-Aldrich  | High   | 9  | 4  | 4   | 4  | 497  | 54    | 5.53  | 23   | 102.6 | 100.4 | 96.9  | 93    | 101.4 | 105.7 |
| P19157 | <i>Gstp1</i>    | Glutathione S-   | High   | 39 | 6  | 28  | 6  | 210  | 23.6  | 7.87  | 479  | 102.1 | 105.4 | 99.6  | 96.9  | 98.5  | 97.4  |
| Q91X20 | <i>Ash2l</i>    | Set1/Ash2        | High   | 3  | 1  | 1   | 1  | 623  | 68.2  | 5.69  | 30   |       |       |       |       |       |       |
| Q99LY9 | <i>Ndufs5</i>   | NADH             | High   | 54 | 6  | 12  | 6  | 106  | 12.6  | 8.92  | 110  | 95.4  | 104.9 | 94.3  | 102.9 | 102.2 | 100.4 |
| Q9CYG7 | <i>Tomm34</i>   | Mitochondrial    | High   | 37 | 9  | 10  | 9  | 309  | 34.3  | 9.14  | 260  | 105.5 | 103.3 | 110.8 | 94.7  | 94.9  | 90.7  |
| P51175 | <i>Ppox</i>     | Protoporphyrino  | High   | 13 | 4  | 4   | 4  | 477  | 50.8  | 8.84  | 42   | 90.8  | 103.9 | 96.1  | 101.7 | 106.1 | 101.4 |
| P11672 | <i>Lcn2</i>     | Neutrophil       | High   | 11 | 2  | 2   | 2  | 200  | 22.9  | 8.81  | 21   | 137.3 | 92    | 195.4 | 58    | 56.4  | 60.9  |
| Q9CR20 | <i>Ier3ip1</i>  | Immediate early  | High   | 24 | 1  | 1   | 1  | 82   | 9     | 8.22  | 53   | 96.5  | 97.7  | 105.2 | 95.5  | 104.5 | 100.5 |
| Q8K284 | <i>Gtf3c1</i>   | General          | Medium | 0  | 1  | 1   | 1  | 2101 | 237.3 | 7.25  | 0    |       |       |       |       |       |       |
| Q6ZPR4 | <i>Kcnt1</i>    | Potassium        | High   | 2  | 2  | 4   | 2  | 1224 | 138   | 7.52  | 88   | 95.1  | 105.4 | 91.3  | 105.1 | 102.2 | 100.8 |
| P62342 | <i>Selenot</i>  | Thioredoxin      | High   | 10 | 2  | 2   | 2  | 195  | 22.3  | 8.6   | 32   | 99.7  | 99.1  | 105   | 87.5  | 103.1 | 105.6 |
| Q80YE4 | <i>Aatk</i>     | Serine/threonine | High   | 5  | 4  | 4   | 4  | 1365 | 144.5 | 4.55  | 78   | 92.7  | 102.5 | 92.5  | 99.7  | 106.9 | 105.7 |
| Q8BJU2 | <i>Tspan9</i>   | Tetraspanin-9    | Medium | 6  | 1  | 1   | 1  | 239  | 26.7  | 7.42  | 0    | 96    | 84.7  | 91.7  | 101   | 107.8 | 118.8 |
| Q62189 | <i>Snrpa</i>    | U1 small nuclear | High   | 13 | 4  | 5   | 3  | 287  | 31.8  | 9.8   | 87   | 98.7  | 99.6  | 100.3 | 97.9  | 109.2 | 94.2  |
| Q9DBR7 | <i>Ppp1r12a</i> | Protein          | High   | 16 | 13 | 16  | 12 | 1029 | 114.9 | 5.49  | 110  | 103.7 | 97.8  | 103   | 97.6  | 98.8  | 99.1  |
| P97372 | <i>Psme2</i>    | Proteasome       | High   | 11 | 3  | 3   | 3  | 239  | 27    | 5.76  | 48   | 113.6 | 106.3 | 148.9 | 76.9  | 75.7  | 78.5  |
| Q8C0D5 | <i>Efl1</i>     | Elongation       | High   | 5  | 6  | 6   | 6  | 1127 | 125.7 | 6.16  | 72   | 96.2  | 102   | 97.6  | 96.6  | 106.8 | 100.9 |
| P63143 | <i>Kcnab1</i>   | Voltage-gated    | High   | 20 | 7  | 10  | 4  | 401  | 44.7  | 9.32  | 103  | 105.5 | 100.5 | 100.2 | 91.2  | 77.9  | 124.7 |
| Q8BH74 | <i>Nup107</i>   | Nuclear pore     | High   | 6  | 4  | 4   | 4  | 926  | 106.7 | 5.43  | 84   | 103.4 | 95.2  | 97.1  | 100.7 | 95.9  | 107.7 |
| Q8CJF9 | <i>Ago3</i>     | Protein          | High   | 9  | 5  | 5   | 2  | 860  | 97.2  | 9.1   | 71   | 90.7  | 96.3  | 104   | 99.6  | 105.3 | 104   |
| Q8R317 | <i>Ubqln1</i>   | Ubiquilin-1      | High   | 14 | 5  | 16  | 3  | 582  | 61.9  | 4.94  | 368  | 99    | 106.9 | 100.1 | 98.9  | 99.7  | 95.3  |
| Q8BWR2 | <i>Pithd1</i>   | PITH domain-     | High   | 19 | 3  | 4   | 3  | 211  | 24.2  | 5.74  | 137  | 96.5  | 96.4  | 105.2 | 99.1  | 103   | 99.8  |
| P53994 | <i>Rab2a</i>    | Ras-related      | High   | 70 | 12 | 30  | 6  | 212  | 23.5  | 6.54  | 748  | 96.9  | 96.2  | 95.8  | 103.1 | 107.3 | 100.8 |
| P70175 | <i>Dlg3</i>     | Disks large      | High   | 33 | 23 | 31  | 22 | 849  | 93.4  | 6.79  | 517  | 97.4  | 97.4  | 93    | 105.1 | 104.2 | 103   |
| Q8K3K8 | <i>Optn</i>     | Optineurin       | High   | 4  | 2  | 2   | 2  | 584  | 67    | 5.26  | 26   |       |       |       |       |       |       |
| B2RR83 | <i>Ythdc2</i>   | 3'-5' RNA        | High   | 4  | 4  | 4   | 4  | 1445 | 161   | 8.51  | 60   | 98.8  | 98.2  | 95.8  | 103.4 | 97    | 106.8 |
| Q8CGZ0 | <i>Cherp</i>    | Calcium          | High   | 3  | 3  | 3   | 3  | 936  | 106.1 | 9.14  | 52   | 99.1  | 101.7 | 102.9 | 99.6  | 96.8  | 99.9  |
| P19096 | <i>Fasn</i>     | Fatty acid       | High   | 35 | 72 | 109 | 72 | 2504 | 272.3 | 6.58  | 2066 | 104   | 104.7 | 106.1 | 95.5  | 93.7  | 96    |
| P27600 | <i>Gna12</i>    | Guanine          | High   | 7  | 3  | 9   | 1  | 379  | 44.1  | 9.83  | 247  |       |       |       |       |       |       |
| Q3U487 | <i>Hectd3</i>   | E3 ubiquitin-    | High   | 11 | 7  | 8   | 7  | 861  | 97.3  | 5.47  | 119  | 111.7 | 95.8  | 92.9  | 94    | 94.7  | 110.9 |
| A2ADA5 | <i>Pusl1</i>    | tRNA             | High   | 4  | 1  | 1   | 1  | 291  | 32    | 10.04 | 36   | 96.5  | 99.7  | 99.3  | 106.3 | 99.3  | 98.9  |
| A3KGB4 | <i>Tbc1d8b</i>  | TBC1 domain      | High   | 2  | 2  | 2   | 1  | 1114 | 127.8 | 5.49  | 47   |       |       |       |       |       |       |
| Q9CQZ6 | <i>Ndufb3</i>   | NADH             | High   | 11 | 1  | 4   | 1  | 104  | 11.7  | 9.04  | 76   | 100   | 106.3 | 85    | 102.1 | 106.9 | 99.8  |
| Q9EQH2 | <i>Erap1</i>    | Endoplasmic      | High   | 6  | 5  | 5   | 5  | 930  | 106.5 | 6.2   | 28   | 108.5 | 108.2 | 110.9 | 93.2  | 90.7  | 88.4  |
| Q5U3K5 | <i>Rab16</i>    | Rab-like protein | High   | 9  | 4  | 5   | 4  | 725  | 79.8  | 5.53  | 130  | 93.7  | 92.2  | 99.4  | 104.5 | 107.3 | 102.8 |
| Q03137 | <i>Epha4</i>    | Ephrin type-A    | High   | 22 | 16 | 26  | 13 | 986  | 109.7 | 6.51  | 488  | 95.3  | 102.9 | 94.2  | 104.3 | 99.4  | 103.9 |
| Q9CYW4 | <i>Hdhd3</i>    | Haloacid         | High   | 15 | 4  | 4   | 4  | 251  | 28    | 6.8   | 29   | 94.8  | 95    | 98.2  | 95.2  | 104.8 | 112.1 |
| Q9JK23 | <i>Psmg1</i>    | Proteasome       | High   | 11 | 3  | 3   | 3  | 289  | 33.1  | 6.37  | 60   | 97.5  | 92.1  | 107.4 | 101.1 | 100.5 | 101.4 |
| Q9CQZ1 | <i>Hsbp1</i>    | Heat shock       | High   | 82 | 4  | 6   | 4  | 76   | 8.6   | 4.31  | 80   | 100.1 | 99    | 94    | 96.6  | 104.7 | 105.5 |
| Q8VCM8 | <i>Ncln</i>     | Nicalin OS=Mus   | High   | 14 | 7  | 9   | 7  | 563  | 62.9  | 6.49  | 77   | 97.3  | 97.8  | 106.5 | 98.8  | 98.8  | 100.8 |
| Q80Y24 | <i>Prickle2</i> | Prickle-like     | High   | 13 | 9  | 9   | 9  | 845  | 95.7  | 7.27  | 76   | 92.9  | 98.5  | 96.6  | 105.5 | 105.9 | 100.7 |
| A2RT62 | <i>Fbxl16</i>   | F-box/LRR-       | High   | 29 | 10 | 16  | 10 | 479  | 51.8  | 6.6   | 387  | 90.4  | 96.2  | 89.5  | 105.8 | 108.8 | 109.2 |
| P40336 | <i>Vps26a</i>   | Vacuolar protein | High   | 37 | 8  | 14  | 8  | 327  | 38.1  | 6.57  | 202  | 101.9 | 97.6  | 101   | 97.6  | 100.7 | 101.2 |
| B7ZMP1 | <i>Xpnpep3</i>  | Xaa-Pro          | High   | 10 | 4  | 6   | 4  | 506  | 56.6  | 7.68  | 121  | 84.9  | 121.2 | 110.3 | 91.5  | 96.3  | 95.9  |
| P58059 | <i>Mrps21</i>   | 28S ribosomal    | High   | 31 | 2  | 2   | 2  | 87   | 10.6  | 10.32 | 23   | 104.6 | 98.8  | 91.5  | 103.2 | 98.6  | 103.3 |
| Q6NV83 | <i>U2surp</i>   | U2 snRNP-        | High   | 4  | 3  | 3   | 3  | 1029 | 118.2 | 8.47  | 62   | 98.5  | 96.2  | 99.4  | 93.7  | 102.5 | 109.6 |
| Q8BK64 | <i>Ahsa1</i>    | Activator of 90  | High   | 49 | 12 | 17  | 12 | 338  | 38.1  | 5.53  | 313  | 96.1  | 104   | 94.7  | 100.7 | 102.1 | 102.5 |
| Q7TNE3 | <i>Spag7</i>    | Sperm-           | High   | 10 | 2  | 2   | 2  | 227  | 25.9  | 7.43  | 62   | 106.3 | 95.5  | 105.2 | 96.1  | 95    | 101.9 |
| P56546 | <i>Ctbp2</i>    | C-terminal-      | High   | 11 | 6  | 10  | 1  | 445  | 48.9  | 6.95  | 155  |       |       |       |       |       |       |
| P11627 | <i>L1cam</i>    | Neural cell      | High   | 17 | 16 | 24  | 16 | 1260 | 140.9 | 5.97  | 543  | 97.3  | 95.6  | 91.4  | 102.4 | 106.7 | 106.6 |
| P21958 | <i>Tap1</i>     | Antigen peptide  | High   | 2  | 2  | 2   | 2  | 724  | 78.8  | 8.79  | 27   | 101.3 | 109.3 | 136.4 | 80.2  | 79.5  | 93.3  |
| Q9ESP1 | <i>Sdf2l1</i>   | Stromal cell-    | Medium | 4  | 1  | 1   | 1  | 221  | 23.6  | 7.42  | 23   | 109.5 | 110.9 | 112.8 | 84.7  | 95.2  | 86.9  |
| O70423 | <i>Aoc3</i>     | Membrane         | Medium | 1  | 1  | 1   | 1  | 765  | 84.5  | 6.42  | 32   | 108.4 | 98.5  | 103.1 | 84.6  | 105.8 | 99.6  |
| P42225 | <i>Stat1</i>    | Signal           | High   | 33 | 21 | 31  | 21 | 749  | 87.1  | 5.58  | 512  | 112   | 124.9 | 161   | 66.7  | 62.4  | 72.9  |
| Q8R050 | <i>Gspt1</i>    | Eukaryotic       | High   | 14 | 8  | 9   | 3  | 636  | 68.6  | 5.21  | 132  | 88.6  | 100.6 | 94.1  | 108.2 | 107.7 | 100.8 |
| Q91YX5 | <i>Lpgat1</i>   | Acyl-            | High   | 23 | 7  | 9   | 7  | 370  | 43.1  | 8.79  | 93   | 97.8  | 102.1 | 98.7  | 104.4 | 97.3  | 99.7  |
| Q6P5U7 | <i>Nwd2</i>     | NACHT and WD     | High   | 7  | 10 | 12  | 10 | 1742 | 197.3 | 6.15  | 122  | 90.6  | 100.9 | 84.9  | 109.9 | 107.8 | 105.9 |
| P70404 | <i>Idh3g</i>    | Isocitrate       | High   | 44 | 13 | 27  | 13 | 393  | 42.8  | 9.01  | 412  | 97.1  | 101.5 | 97.8  | 101.8 | 98.1  | 103.7 |
| P48678 | <i>Lmna</i>     | Prelamin-A/C     | High   | 42 | 31 | 38  | 29 | 665  | 74.2  | 6.98  | 572  | 105.1 | 102.9 | 100.6 | 98.1  | 97.4  | 96    |



|        |                 |                    |        |    |    |     |    |      |       |       |      |       |       |       |       |       |       |
|--------|-----------------|--------------------|--------|----|----|-----|----|------|-------|-------|------|-------|-------|-------|-------|-------|-------|
| Q9D074 | <i>Mgrn1</i>    | E3 ubiquitin-      | Low    | 3  | 1  | 1   | 1  | 532  | 58.4  | 4.88  | 0    |       |       |       |       |       |       |
| Q6P5E4 | <i>Uggt1</i>    | UDP-               | High   | 16 | 22 | 31  | 22 | 1551 | 176.3 | 5.62  | 387  | 103.1 | 101.1 | 104.2 | 98.7  | 95.5  | 97.5  |
| O88456 | <i>Capns1</i>   | Calpain small      | High   | 21 | 4  | 6   | 4  | 269  | 28.4  | 5.63  | 228  | 107.9 | 104.5 | 115.4 | 91    | 86.8  | 94.4  |
| Q8R4Y4 | <i>Stab1</i>    | Stabilin-1         | Low    | 1  | 1  | 1   | 1  | 2571 | 276.1 | 6.65  | 0    |       |       |       |       |       |       |
| O08788 | <i>Dctn1</i>    | Dynactin subunit   | High   | 43 | 43 | 71  | 43 | 1281 | 141.6 | 5.9   | 1332 | 97.6  | 100.4 | 95    | 100.5 | 103.4 | 103   |
| Q9CR27 | <i>Washc3</i>   | WASH complex       | High   | 11 | 2  | 2   | 2  | 194  | 21.1  | 4.46  | 23   | 104.4 | 101   | 106.7 | 99.2  | 97.2  | 91.5  |
| B2RUR8 | <i>Otud7b</i>   | OTU domain-        | High   | 3  | 2  | 2   | 2  | 840  | 91.9  | 6.86  | 47   | 103.4 | 101.4 | 91.7  | 100.5 | 102.4 | 100.5 |
| Q9JLF6 | <i>Tgm1</i>     | Protein-           | High   | 20 | 15 | 21  | 15 | 815  | 89.8  | 6.51  | 317  | 138.6 | 115.8 | 161.1 | 58.6  | 61.2  | 64.6  |
| Q3UA37 | <i>Qrich1</i>   | Glutamine-rich     | High   | 3  | 2  | 2   | 2  | 777  | 86.5  | 5.96  | 27   | 94.3  | 106   | 100.8 | 104.6 | 92    | 102.3 |
| Q62384 | <i>Zpr1</i>     | Zinc finger        | High   | 7  | 3  | 3   | 3  | 459  | 50.7  | 4.78  | 47   | 98.6  | 100.9 | 103.8 | 96.4  | 102.4 | 97.9  |
| Q8HW98 | <i>Igln5</i>    | IgLON family       | High   | 11 | 3  | 4   | 3  | 336  | 36.7  | 7.69  | 113  | 96.7  | 92.7  | 90.8  | 102.5 | 105.1 | 112.3 |
| Q8K3Z9 | <i>Pom121</i>   | Nuclear            | Medium | 1  | 1  | 1   | 1  | 1200 | 120.9 | 10.2  | 30   | 104.4 | 104.1 | 95.8  | 101.6 | 91.9  | 102.2 |
| O54901 | <i>Cd200</i>    | OX-2 membrane      | High   | 22 | 5  | 9   | 5  | 278  | 31.2  | 8.79  | 166  | 96.5  | 89.7  | 102   | 100.5 | 107.9 | 103.4 |
| Q3UHH1 | <i>Zswim8</i>   | Zinc finger        | High   | 22 | 2  | 2   | 2  | 1832 | 196.9 | 6.84  | 27   | 95.3  | 98.1  | 94.3  | 105.7 | 109.6 | 96.9  |
| Q9JIF0 | <i>Prmt1</i>    | Protein arginine   | High   | 38 | 14 | 18  | 11 | 371  | 42.4  | 5.43  | 203  | 100.3 | 97.3  | 102.2 | 96.2  | 102.4 | 101.6 |
| Q91W18 | <i>Tdrd3</i>    | Tudor domain-      | Medium | 3  | 2  | 2   | 2  | 743  | 82.2  | 9.11  | 15   | 99.8  | 100   | 84.9  | 109   | 111.4 | 94.9  |
| Q810A3 | <i>Ttc9c</i>    | Tetratricopeptide  | High   | 8  | 1  | 1   | 1  | 171  | 20    | 9.29  | 25   |       |       |       |       |       |       |
| Q8R016 | <i>Blmh</i>     | Bleomycin          | High   | 34 | 12 | 18  | 12 | 455  | 52.5  | 6.48  | 223  | 109.6 | 93.2  | 114.9 | 96.1  | 89.4  | 96.7  |
| Q80TZ3 | <i>Dnajc6</i>   | Putative           | High   | 29 | 18 | 30  | 16 | 938  | 102.2 | 7.23  | 455  | 97.9  | 101.9 | 97.8  | 102.9 | 99.5  | 100   |
| A2AAY5 | <i>Sh3pxd2b</i> | SH3 and PX         | Medium | 1  | 1  | 1   | 1  | 908  | 101.5 | 8.66  | 26   | 98.4  | 106.1 | 113.4 | 88.8  | 95.1  | 98.4  |
| Q5F2E7 | <i>Nufip2</i>   | Nuclear fragile X  | High   | 7  | 3  | 3   | 3  | 692  | 75.6  | 8.7   | 52   | 95.1  | 105.5 | 92.8  | 101.4 | 100.5 | 104.7 |
| Q80ZD8 | <i>Amigo1</i>   | Amphoterin-        | High   | 7  | 3  | 3   | 3  | 492  | 55.3  | 6.86  | 35   | 93.6  | 97.1  | 85.4  | 105.8 | 105.5 | 112.6 |
| Q9ERG0 | <i>Lima1</i>    | LIM domain and     | High   | 2  | 1  | 1   | 1  | 753  | 84    | 6.6   | 16   | 108.1 | 83.3  | 109.6 | 106.8 | 94.2  | 98    |
| Q8BG40 | <i>Katnb1</i>   | Katanin p80        | High   | 14 | 8  | 8   | 8  | 658  | 72.6  | 7.27  | 129  | 93.8  | 98.1  | 92.7  | 107.3 | 103.8 | 104.3 |
| Q14B80 | <i>Kcnc2</i>    | Potassium          | High   | 5  | 2  | 3   | 2  | 642  | 70.5  | 7.69  | 48   | 95.5  | 96.7  | 92.2  | 100.6 | 100.2 | 114.8 |
| B0F2B4 | <i>Nlgn4l</i>   | Neuroigin 4-like   | High   | 9  | 6  | 7   | 4  | 945  | 97.3  | 6.32  | 117  | 95.7  | 97.8  | 93.4  | 102.7 | 101.1 | 109.4 |
| Q8VCI5 | <i>Pex19</i>    | Peroxisomal        | High   | 37 | 8  | 9   | 8  | 299  | 32.7  | 4.34  | 117  | 96.7  | 97.6  | 98.9  | 102.1 | 104.3 | 100.4 |
| P27773 | <i>Pdia3</i>    | Protein disulfide- | High   | 50 | 24 | 54  | 24 | 505  | 56.6  | 6.21  | 746  | 106.2 | 103.6 | 115   | 90.7  | 92.6  | 91.9  |
| O08997 | <i>Atox1</i>    | Copper transport   | High   | 59 | 4  | 5   | 4  | 68   | 7.3   | 6.51  | 92   | 102.3 | 105.5 | 107   | 95.5  | 95.3  | 94.4  |
| P01635 |                 | Ig kappa chain     | High   | 17 | 2  | 2   | 2  | 115  | 12.6  | 8.31  | 39   | 137   | 97.8  | 149.8 | 75.7  | 64.1  | 75.5  |
| P20357 | <i>Map2</i>     | Microtubule-       | High   | 54 | 89 | 212 | 89 | 1828 | 199   | 4.91  | 3607 | 94.9  | 98.7  | 89.6  | 106.1 | 107.3 | 103.4 |
| O35623 | <i>Bet1</i>     | BET1 homolog       | High   | 15 | 1  | 1   | 1  | 118  | 13.3  | 9.07  | 57   | 106.1 | 98.7  | 103.4 | 95.2  | 92.5  | 104.1 |
| Q9Z108 | <i>Stau1</i>    | Double-stranded    | High   | 12 | 5  | 6   | 4  | 487  | 53.9  | 9.52  | 104  | 97.6  | 107.6 | 95.8  | 98.8  | 99.2  | 100.9 |
| P56480 | <i>Atp5f1b</i>  | ATP synthase       | High   | 75 | 29 | 212 | 29 | 529  | 56.3  | 5.34  | 4791 | 96.5  | 103.5 | 89.9  | 102.1 | 104.5 | 103.4 |
| P97807 | <i>Fh</i>       | Fumarate           | High   | 60 | 22 | 53  | 22 | 507  | 54.3  | 9.04  | 820  | 98.3  | 103.9 | 92.1  | 102.3 | 103   | 100.4 |
| B1AWN6 | <i>Scn2a</i>    | Sodium channel     | High   | 16 | 26 | 33  | 16 | 2006 | 227.8 | 5.67  | 513  | 95.6  | 102.1 | 91.1  | 103.1 | 102.7 | 105.4 |
| Q80TA1 | <i>Selenoi</i>  | Ethanolamineph     | High   | 4  | 1  | 2   | 1  | 398  | 45.3  | 6.83  | 48   | 95.1  | 100.8 | 90.8  | 104.4 | 100.3 | 108.6 |
| P58058 | <i>Nadk</i>     | NAD kinase         | Low    | 3  | 1  | 1   | 1  | 439  | 48.6  | 6.52  | 0    |       |       |       |       |       |       |
| Q68FF6 | <i>Git1</i>     | ARF GTPase-        | High   | 34 | 21 | 23  | 21 | 770  | 85.2  | 6.93  | 371  | 96.5  | 99.5  | 98.3  | 101.2 | 101.2 | 103.3 |
| P50544 | <i>Acadvl</i>   | Very long-chain    | High   | 41 | 20 | 28  | 20 | 656  | 70.8  | 8.75  | 606  | 99.8  | 106   | 107.4 | 95.5  | 95.3  | 96    |
| Q9D6J5 | <i>Ndufb8</i>   | NADH               | High   | 55 | 7  | 12  | 7  | 186  | 21.9  | 6.64  | 250  | 94.2  | 100   | 94.7  | 104.2 | 99.7  | 107.2 |
| Q9CQ00 | <i>Dmac1</i>    | Distal             | Low    | 13 | 1  | 1   | 1  | 111  | 11.3  | 9.39  | 0    | 92.3  | 103.1 | 89.6  | 102.1 | 102.2 | 110.7 |
| Q8K406 | <i>Lgi3</i>     | Leucine-rich       | High   | 18 | 8  | 8   | 8  | 548  | 61.8  | 8.16  | 79   | 99.6  | 116.3 | 90.7  | 100.3 | 95.1  | 98    |
| P04104 | <i>Krt1</i>     | Keratin, type II   | High   | 5  | 3  | 6   | 2  | 637  | 65.6  | 8.15  | 160  | 79.8  | 111   | 84.1  | 146.8 | 79.6  | 98.8  |
| Q8CGM1 | <i>Adgrb2</i>   | Adhesion G         | High   | 6  | 8  | 8   | 7  | 1561 | 169.8 | 7.36  | 57   | 95.8  | 103.2 | 96.4  | 103.2 | 100.4 | 101   |
| Q80Y98 | <i>Dhd2</i>     | Phospholipase      | High   | 9  | 5  | 6   | 5  | 699  | 79.5  | 5.31  | 53   | 98.7  | 100.4 | 91.9  | 103.6 | 100.4 | 105.1 |
| Q9D1L0 | <i>Chchd2</i>   | Coiled-coil-helix- | High   | 24 | 2  | 2   | 2  | 153  | 15.7  | 9.66  | 23   | 93.9  | 111.9 | 97.1  | 107.3 | 88.6  | 101.2 |
| P10107 | <i>Anxa1</i>    | Annexin A1         | High   | 34 | 10 | 11  | 9  | 346  | 38.7  | 7.37  | 253  | 119.9 | 104.2 | 190.4 | 56.8  | 61.9  | 66.8  |
| P58064 | <i>Mrps6</i>    | 28S ribosomal      | High   | 23 | 3  | 3   | 3  | 125  | 14.3  | 9.5   | 57   | 98.2  | 100.1 | 94.2  | 105   | 101   | 101.4 |
| P27661 | <i>H2ax</i>     | Histone H2AX       | High   | 28 | 6  | 19  | 3  | 143  | 15.1  | 10.74 | 251  | 103.2 | 101.6 | 101   | 99.8  | 99.1  | 95.2  |
| Q8C050 | <i>Rps6ka5</i>  | Ribosomal          | High   | 4  | 3  | 3   | 3  | 863  | 96.5  | 7.34  | 52   | 101.1 | 99.6  | 98.7  | 96    | 95    | 109.6 |
| E9Q634 | <i>Myo1e</i>    | Unconventional     | High   | 1  | 1  | 2   | 1  | 1107 | 126.7 | 9.07  | 48   | 114.1 | 109.7 | 121.4 | 85    | 82.7  | 87.1  |
| Q9Z0R9 | <i>Fads2</i>    | Acyl-CoA 6-        | High   | 4  | 2  | 2   | 2  | 444  | 52.4  | 8.82  | 39   | 107.6 | 84.6  | 125.3 | 85.2  | 85.1  | 112.1 |
| P01644 |                 | Ig kappa chain     | High   | 36 | 2  | 2   | 2  | 108  | 11.9  | 7.97  | 55   | 153.7 | 85    | 181.3 | 62.6  | 57.8  | 59.6  |
| Q9Z275 | <i>Rlbp1</i>    | Retinaldehyde-     | High   | 11 | 2  | 2   | 2  | 317  | 36.4  | 5.06  | 78   | 99.3  | 96.3  | 93.9  | 105   | 105.2 | 100.4 |
| Q9CQN1 | <i>Trap1</i>    | Heat shock         | High   | 26 | 16 | 27  | 15 | 706  | 80.2  | 6.68  | 446  | 98.4  | 102.1 | 103.9 | 97.9  | 97.6  | 100   |
| Q99MD9 | <i>Nasp</i>     | Nuclear            | High   | 2  | 2  | 2   | 2  | 773  | 83.9  | 4.37  | 19   | 107.1 | 95.6  | 107.1 | 95.3  | 96.3  | 98.5  |
| Q8BK67 | <i>Rcc2</i>     | Protein RCC2       | High   | 15 | 7  | 7   | 7  | 520  | 55.9  | 8.72  | 81   | 99.2  | 101.5 | 100.4 | 100.2 | 100.3 | 98.5  |
| P15116 | <i>Cdh2</i>     | Cadherin-2         | High   | 19 | 10 | 14  | 10 | 906  | 99.7  | 4.78  | 178  | 97.7  | 96.1  | 101.2 | 96.8  | 102.2 | 106   |
| Q9Z0J0 | <i>Npc2</i>     | NPC intracellular  | High   | 34 | 4  | 5   | 4  | 149  | 16.4  | 7.68  | 48   | 98.9  | 97    | 136.6 | 90.7  | 83.1  | 93.8  |
| Q8K4J6 | <i>Mrtfa</i>    | Myocardin-         | Low    | 1  | 1  | 1   | 1  | 964  | 102.5 | 5.5   | 0    | 97.7  | 102.4 | 101.5 | 102   | 97.8  | 98.6  |
| Q9CPY6 | <i>Gid4</i>     | Glucose-induced    | Medium | 9  | 1  | 1   | 1  | 217  | 24.8  | 6.52  | 0    | 83.5  | 105.2 | 103.8 | 101.6 | 94.9  | 111   |
| P00920 | <i>Ca2</i>      | Carbonic           | High   | 59 | 10 | 23  | 10 | 260  | 29    | 7.01  | 385  | 98.8  | 111.5 | 104.9 | 92.9  | 96.7  | 95.3  |
| Q56A07 | <i>Scn2b</i>    | Sodium channel     | High   | 23 | 4  | 8   | 4  | 215  | 24.2  | 6.54  | 128  | 95.8  | 98.4  | 91.3  | 106.6 | 106.4 | 101.6 |
| Q80ZF8 | <i>Adgrb3</i>   | Adhesion G         | High   | 2  | 4  | 4   | 2  | 1522 | 171.2 | 7.02  | 30   | 98.4  | 107   | 88.2  | 96    | 111.2 | 99.2  |
| Q9D7N9 | <i>Apmap</i>    | Adipocyte          | High   | 36 | 13 | 20  | 13 | 415  | 46.4  | 6.32  | 292  | 100.6 | 103.4 | 102   | 100.6 | 97.4  | 96.1  |
| Q8R1B4 | <i>Eif3c</i>    | Eukaryotic         | High   | 9  | 10 | 13  | 10 | 911  | 105.5 | 5.78  | 152  | 101.4 | 101.1 | 102.9 | 96.6  | 99.4  | 98.6  |
| P54763 | <i>Ephb2</i>    | Ephrin type-B      | High   | 10 | 7  | 9   | 6  | 986  | 109.8 | 5.71  | 120  | 96.9  | 97    | 96.9  | 106.2 | 100   | 103   |

|        |                  |                  |        |    |    |     |    |      |       |       |      |       |       |       |       |       |       |
|--------|------------------|------------------|--------|----|----|-----|----|------|-------|-------|------|-------|-------|-------|-------|-------|-------|
| P60853 | <i>Lzts1</i>     | Leucine zipper   | High   | 12 | 6  | 7   | 6  | 599  | 67.2  | 7.56  | 84   | 102.2 | 94.7  | 101.1 | 97.9  | 98.9  | 105.1 |
| Q9CR64 | <i>Tmem167a</i>  | Protein kish-A   | Medium | 13 | 1  | 1   | 1  | 72   | 8.1   | 8.95  | 20   | 97.4  | 104   | 102.1 | 98    | 97.4  | 101.1 |
| Q9JIF7 | <i>Copb1</i>     | Coatomer         | High   | 34 | 24 | 34  | 24 | 953  | 107   | 6     | 418  | 100.3 | 98.8  | 102.9 | 96.1  | 100.9 | 101   |
| P49443 | <i>Ppm1a</i>     | Protein          | High   | 38 | 11 | 16  | 11 | 382  | 42.4  | 5.36  | 202  | 97.5  | 98.2  | 97    | 103.2 | 100.1 | 104   |
| O55101 | <i>Syngt2</i>    | Synaptogyrin-2   | Low    | 4  | 1  | 1   | 1  | 224  | 24.8  | 4.78  | 0    | 105.1 | 110.1 | 116.9 | 84.7  | 85.8  | 97.4  |
| Q8BFT9 | <i>Svop</i>      | Synaptic vesicle | High   | 6  | 3  | 4   | 3  | 548  | 60.7  | 5.85  | 93   | 94.4  | 104.9 | 90.8  | 101   | 108.6 | 100.2 |
| Q8C6G8 | <i>Wdr26</i>     | WD repeat-       | High   | 8  | 4  | 5   | 4  | 641  | 70.5  | 6.16  | 23   | 94.5  | 101.6 | 98.1  | 105.1 | 96.3  | 104.5 |
| Q8CI32 | <i>Bag5</i>      | BAG family       | High   | 25 | 9  | 11  | 9  | 447  | 50.9  | 6.05  | 187  | 98    | 103   | 99.4  | 98.7  | 99.6  | 101.4 |
| Q91ZG2 | <i>Mpped1</i>    | Metallophosphoe  | High   | 4  | 1  | 1   | 1  | 326  | 37.2  | 6.65  | 20   | 103.9 | 96.4  | 96.6  | 101.8 | 93.2  | 107.9 |
| Q9Z0W3 | <i>Nup160</i>    | Nuclear pore     | Medium | 1  | 1  | 1   | 1  | 1402 | 158.1 | 5.52  | 0    |       |       |       |       |       |       |
| Q9QZQ8 | <i>Macroh2a1</i> | Core histone     | High   | 34 | 11 | 19  | 10 | 372  | 39.7  | 9.8   | 439  | 104.8 | 97.1  | 109.6 | 96.6  | 96.7  | 95.2  |
| Q3TYX3 | <i>Smyd5</i>     | SET and MYND     | High   | 5  | 1  | 1   | 1  | 416  | 47.1  | 5.21  | 15   |       |       |       |       |       |       |
| Q64345 | <i>Ifit3</i>     | Interferon-      | High   | 10 | 4  | 4   | 4  | 403  | 47.2  | 5.64  | 40   | 117.6 | 128.1 | 128.9 | 68.8  | 68.4  | 88.3  |
| P10854 | <i>H2bc14</i>    | Histone H2B      | High   | 53 | 8  | 64  | 4  | 126  | 13.9  | 10.32 | 965  | 106.5 | 99.9  | 120.7 | 91.7  | 95.9  | 85.4  |
| Q8BH44 | <i>Coro2b</i>    | Coronin-2B       | High   | 26 | 12 | 21  | 12 | 480  | 54.9  | 8.27  | 366  | 99.3  | 101.5 | 92.8  | 99.4  | 100.9 | 106.1 |
| Q5SVR0 | <i>Tbc1d9b</i>   | TBC1 domain      | High   | 7  | 7  | 8   | 7  | 1263 | 141.7 | 5.29  | 150  | 102.4 | 102.8 | 100.1 | 96.1  | 97.8  | 100.7 |
| Q8R2U0 | <i>Seh1l</i>     | Nucleoporin      | High   | 14 | 4  | 4   | 4  | 360  | 39.7  | 8.05  | 20   | 101.7 | 93.6  | 90    | 105   | 103   | 106.7 |
| Q8BGN8 | <i>Synpr</i>     | Synaptoporin     | High   | 15 | 4  | 10  | 4  | 265  | 29.2  | 6.3   | 223  | 101.3 | 100.3 | 101.7 | 101.2 | 97    | 98.4  |
| Q9D6T0 | <i>Nosip</i>     | Nitric oxide     | High   | 4  | 1  | 1   | 1  | 301  | 33.2  | 8.62  | 27   |       |       |       |       |       |       |
| Q8BIQ5 | <i>Cstf2</i>     | Cleavage         | High   | 12 | 6  | 7   | 6  | 580  | 61.3  | 6.83  | 121  | 98.5  | 96.5  | 96.7  | 104.9 | 103.9 | 99.6  |
| Q8CIN4 | <i>Pak2</i>      | Serine/threonine | High   | 42 | 18 | 30  | 11 | 524  | 57.9  | 5.77  | 466  | 100.9 | 101.9 | 102.9 | 97.7  | 98.9  | 97.8  |
| Q91VU0 | <i>Fam3c</i>     | Protein FAM3C    | High   | 27 | 5  | 5   | 5  | 227  | 24.7  | 8.29  | 111  | 102.6 | 98.8  | 107.5 | 96.1  | 93.8  | 101.2 |
| Q9Z204 | <i>Hnrmpc</i>    | Heterogeneous    | High   | 39 | 14 | 31  | 13 | 313  | 34.4  | 5.05  | 482  | 102.1 | 98.4  | 104.2 | 98.9  | 99.9  | 96.5  |
| Q8VHQ3 | <i>Ppp1r16b</i>  | Protein          | Medium | 3  | 1  | 1   | 1  | 568  | 63.5  | 6.58  | 39   | 97.6  | 101.2 | 82.8  | 107.8 | 105.6 | 104.9 |
| Q8K1S4 | <i>Unc5a</i>     | Netrin receptor  | High   | 5  | 3  | 4   | 3  | 898  | 98.8  | 6.92  | 74   | 90.6  | 96.8  | 100.4 | 105.8 | 104.6 | 101.8 |
| Q80XP8 | <i>Fam76b</i>    | Protein FAM76B   | Medium | 3  | 1  | 1   | 1  | 339  | 38.5  | 9.29  | 0    |       |       |       |       |       |       |
| P97783 | <i>Mlit11</i>    | Protein AF1q     | Low    | 8  | 1  | 1   | 1  | 90   | 10    | 4.41  | 16   | 96.1  | 89.1  | 89.5  | 112.7 | 110.6 | 102.1 |
| Q99KG3 | <i>Rbm10</i>     | RNA-binding      | High   | 3  | 3  | 3   | 2  | 930  | 103.4 | 5.92  | 34   | 94.9  | 102.8 | 93.2  | 115.8 | 93.7  | 99.6  |
| Q8JZP2 | <i>Syn3</i>      | Synapsin-3       | High   | 18 | 8  | 15  | 6  | 579  | 63.3  | 9.38  | 281  | 95.8  | 97.3  | 95.5  | 101.8 | 112.3 | 97.4  |
| P14152 | <i>Mdh1</i>      | Malate           | High   | 46 | 16 | 74  | 16 | 334  | 36.5  | 6.58  | 1344 | 95.1  | 101.4 | 86.6  | 106.1 | 106.6 | 104.2 |
| P97855 | <i>G3bp1</i>     | Ras GTPase-      | High   | 11 | 4  | 7   | 4  | 465  | 51.8  | 5.59  | 144  | 97.7  | 99.2  | 102.9 | 101.4 | 95.8  | 102.9 |
| Q8CH72 | <i>Trim32</i>    | E3 ubiquitin-    | High   | 22 | 11 | 12  | 11 | 655  | 72    | 6.9   | 228  | 96.3  | 99.3  | 92.6  | 101.8 | 102.8 | 107.2 |
| A2APT9 | <i>Klhdc7a</i>   | Kelch domain-    | Medium | 3  | 1  | 1   | 1  | 773  | 83.5  | 6.33  | 15   | 86.3  | 106.4 | 94.7  | 88.9  | 108.5 | 115.2 |
| Q62351 | <i>Tfrc</i>      | Transferrin      | High   | 22 | 15 | 20  | 15 | 763  | 85.7  | 6.57  | 309  | 95.6  | 105.1 | 80.7  | 108.2 | 105.1 | 105.3 |
| Q80WQ2 | <i>Vac14</i>     | Protein VAC14    | High   | 8  | 5  | 6   | 5  | 782  | 88    | 6.13  | 84   | 101.1 | 98.4  | 94.3  | 103.6 | 101.6 | 101   |
| P56655 | <i>Cyp2c38</i>   | Cytochrome       | Low    | 2  | 1  | 1   | 1  | 490  | 56.2  | 8.29  | 0    |       |       |       |       |       |       |
| Q09LZ8 | <i>Agb4</i>      | Cytosolic        | High   | 3  | 1  | 1   | 1  | 540  | 62.2  | 7.36  | 31   | 97.1  | 114.6 | 86.3  | 107   | 89.9  | 105.1 |
| P62334 | <i>Psmc6</i>     | 26S proteasome   | High   | 44 | 13 | 19  | 13 | 389  | 44.1  | 7.49  | 339  | 94.5  | 94.9  | 97.9  | 103.3 | 100.6 | 108.9 |
| Q8C145 | <i>Slc39a6</i>   | Zinc transporter | High   | 7  | 4  | 5   | 4  | 765  | 86.3  | 6.84  | 74   | 110.8 | 92    | 109.6 | 94.5  | 96.8  | 96.3  |
| O35598 | <i>Adam10</i>    | Disintegrin and  | High   | 2  | 1  | 2   | 1  | 749  | 83.9  | 7.94  | 28   | 94.2  | 92.7  | 109   | 102.9 | 101.2 | 100   |
| Q8BQ47 | <i>Cnpy4</i>     | Protein canopy   | High   | 5  | 1  | 1   | 1  | 245  | 28.1  | 4.77  | 54   |       |       |       |       |       |       |
| A3KMP2 | <i>Ttc38</i>     | Tetrapeptide     | High   | 5  | 2  | 2   | 2  | 465  | 52.2  | 6.3   | 27   | 98.4  | 111.5 | 109.4 | 97    | 89.5  | 94.2  |
| Q8R081 | <i>Hnrmp1</i>    | Heterogeneous    | High   | 35 | 14 | 27  | 14 | 586  | 63.9  | 8.1   | 423  | 101.9 | 96.8  | 99.6  | 102.9 | 101.3 | 97.5  |
| P42859 | <i>Htt</i>       | Huntingtin       | High   | 13 | 31 | 40  | 31 | 3119 | 344.5 | 6.29  | 702  | 97.4  | 99.1  | 99.8  | 102.9 | 100.3 | 100.5 |
| Q5XG73 | <i>Acbd5</i>     | Acyl-CoA-        | High   | 4  | 2  | 3   | 2  | 508  | 56.6  | 5.41  | 54   | 118.6 | 107.1 | 102.7 | 87.2  | 88    | 96.4  |
| Q9CQX0 | <i>Otub2</i>     | Ubiquitin        | Medium | 7  | 1  | 1   | 1  | 234  | 27.3  | 6.28  | 19   |       |       |       |       |       |       |
| P83741 | <i>Wnk1</i>      | Serine/threonine | High   | 4  | 9  | 10  | 5  | 2377 | 250.8 | 6.43  | 76   | 104.4 | 106.2 | 105   | 89.6  | 96.2  | 98.6  |
| Q8R5A3 | <i>Appb1ip</i>   | Amyloid beta A4  | Medium | 1  | 1  | 1   | 1  | 670  | 74.3  | 5.35  | 34   | 137.9 | 108   | 153.9 | 66.8  | 64.4  | 69    |
| Q9WUM4 | <i>Coro1c</i>    | Coronin-1C       | High   | 29 | 14 | 25  | 13 | 474  | 53.1  | 7.08  | 232  | 100.5 | 96.4  | 102.3 | 98    | 99.4  | 103.4 |
| Q99MK8 | <i>Grk2</i>      | Beta-adrenergic  | High   | 32 | 16 | 20  | 11 | 689  | 79.6  | 7.28  | 401  | 95.8  | 98.1  | 93.5  | 103.1 | 107.7 | 101.8 |
| P14873 | <i>Map1b</i>     | Microtubule-     | High   | 38 | 76 | 149 | 75 | 2464 | 270.1 | 4.83  | 3019 | 96    | 98.7  | 98.8  | 101.3 | 103.1 | 102.1 |
| Q810B7 | <i>Slitrk5</i>   | SLIT and NTRK-   | High   | 2  | 2  | 2   | 2  | 957  | 107.1 | 6.93  | 13   | 94.7  | 92    | 96    | 117.7 | 98.6  | 101   |
| P97364 | <i>Seps2</i>     | Selenide, water  | High   | 10 | 3  | 3   | 3  | 452  | 47.8  | 6.06  | 41   | 100.3 | 102.4 | 100   | 100.7 | 101   | 95.5  |
| Q3U0M1 | <i>Trappc9</i>   | Trafficking      | High   | 10 | 11 | 13  | 11 | 1148 | 128.2 | 6.47  | 183  | 96.5  | 106.4 | 95    | 101.1 | 101.1 | 99.8  |
| P54285 | <i>Cacnb3</i>    | Voltage-         | High   | 12 | 6  | 9   | 3  | 484  | 54.5  | 6.27  | 68   | 120.1 | 94.9  | 123.7 | 85.8  | 88.5  | 87.1  |
| Q9D2V7 | <i>Coro7</i>     | Coronin-7        | High   | 22 | 14 | 21  | 14 | 922  | 100.7 | 5.77  | 341  | 96.8  | 99.6  | 96.4  | 101.8 | 102   | 103.4 |
| P38060 | <i>Hmgcl</i>     | Hydroxymethylgl  | High   | 23 | 6  | 8   | 6  | 325  | 34.2  | 8.41  | 202  | 96.9  | 96.7  | 93.3  | 104.4 | 102.3 | 106.4 |
| P30999 | <i>Ctnnd1</i>    | Catenin delta-1  | High   | 22 | 16 | 18  | 16 | 938  | 104.9 | 6.87  | 297  | 98.2  | 99.1  | 93.7  | 101.8 | 101.2 | 105.9 |
| Q7TN98 | <i>Cpeb4</i>     | Cytoplasmic      | Medium | 2  | 1  | 1   | 1  | 729  | 80.1  | 7.18  | 19   |       |       |       |       |       |       |
| P41233 | <i>Abca1</i>     | Phospholipid-    | High   | 1  | 3  | 3   | 3  | 2261 | 253.7 | 6.81  | 61   | 109.1 | 98.1  | 126.3 | 81.6  | 81.3  | 103.7 |
| P07759 | <i>Serpina3k</i> | Serine protease  | High   | 32 | 11 | 76  | 6  | 418  | 46.9  | 5.16  | 2355 | 169.1 | 64.8  | 219   | 46.2  | 50.1  | 50.7  |
| P09405 | <i>Ncl</i>       | Nucleolin        | High   | 38 | 32 | 54  | 32 | 707  | 76.7  | 4.75  | 922  | 102.1 | 98.1  | 101.4 | 102.7 | 98.7  | 97    |
| O88188 | <i>Ly86</i>      | Lymphocyte       | Medium | 11 | 1  | 1   | 1  | 162  | 17.8  | 5.22  | 0    | 110.9 | 92.7  | 126.5 | 84.9  | 89.7  | 95.3  |
| P98064 | <i>Masp1</i>     | Mannan-binding   | Low    | 2  | 1  | 1   | 1  | 704  | 79.9  | 5.55  | 0    | 92    | 105.4 | 86.5  | 90.4  | 100.3 | 125.4 |
| Q8JZW4 | <i>Cpne5</i>     | Copine-5         | High   | 25 | 14 | 20  | 7  | 593  | 65.6  | 5.77  | 277  | 93.4  | 105.8 | 85.3  | 99    | 113   | 103.4 |
| P48758 | <i>Cbr1</i>      | Carbonyl         | High   | 54 | 12 | 23  | 11 | 277  | 30.6  | 8.31  | 437  | 99.8  | 98.2  | 97.9  | 99.8  | 100.9 | 103.4 |
| P69566 | <i>Ranbp9</i>    | Ran-binding      | High   | 8  | 4  | 5   | 4  | 653  | 71    | 6.84  | 92   | 100.8 | 98.1  | 90.5  | 102.5 | 104.2 | 103.8 |
| Q61739 | <i>Itga6</i>     | Integrin alpha-6 | High   | 7  | 5  | 5   | 5  | 1091 | 122.1 | 7.03  | 49   | 97.7  | 113.9 | 99.1  | 93.2  | 91.2  | 104.9 |

|        |                 |                   |        |    |    |    |    |      |       |       |      |       |       |       |       |       |       |
|--------|-----------------|-------------------|--------|----|----|----|----|------|-------|-------|------|-------|-------|-------|-------|-------|-------|
| E9PVA8 | <i>Gcn1</i>     | eIF-2-alpha       | High   | 14 | 29 | 32 | 29 | 2671 | 292.8 | 7.36  | 573  | 100.5 | 99.1  | 102.2 | 96.8  | 98.9  | 102.5 |
| Q8K3X4 | <i>Irf2bpl</i>  | Probable E3       | High   | 2  | 1  | 1  | 1  | 775  | 80.5  | 8.24  | 24   | 91.1  | 103.7 | 90    | 102.4 | 104.8 | 108   |
| Q9CWZ7 | <i>Napg</i>     | Gamma-soluble     | High   | 53 | 16 | 34 | 16 | 312  | 34.7  | 5.41  | 594  | 97.5  | 102   | 93.7  | 100.3 | 104   | 102.5 |
| Q9EQF6 | <i>Dpysl5</i>   | Dihydropyrimidin  | High   | 50 | 21 | 35 | 21 | 564  | 61.5  | 7.09  | 494  | 80.8  | 79.2  | 81    | 115.1 | 124.3 | 119.6 |
| Q8BNY6 | <i>Ncs1</i>     | Neuronal          | High   | 41 | 7  | 13 | 7  | 190  | 21.9  | 4.83  | 273  | 101.3 | 96.5  | 108.4 | 96.5  | 100.3 | 96.9  |
| Q8BYI8 | <i>Fam234b</i>  | Protein           | High   | 10 | 5  | 6  | 5  | 624  | 67    | 5.03  | 75   | 98.3  | 100.6 | 95.1  | 99.7  | 102.4 | 104   |
| O35405 | <i>Pld3</i>     | 5'-3'             | High   | 10 | 5  | 6  | 5  | 488  | 54.4  | 6.52  | 134  | 94.6  | 98.3  | 85    | 111.3 | 105.8 | 105   |
| Q05D44 | <i>Eif5b</i>    | Eukaryotic        | High   | 8  | 6  | 6  | 6  | 1216 | 137.5 | 5.59  | 53   | 103.5 | 93.2  | 102.7 | 101.8 | 99    | 99.8  |
| Q8BWQ6 | <i>Vps35l</i>   | VPS35             | High   | 8  | 6  | 9  | 6  | 963  | 109   | 7.31  | 107  | 99.9  | 100.4 | 99.2  | 104.3 | 97.2  | 98.9  |
| P51910 | <i>Apod</i>     | Apolipoprotein D  | High   | 24 | 4  | 5  | 4  | 189  | 21.5  | 4.91  | 60   | 153.3 | 100.2 | 160.6 | 60    | 59.8  | 66.1  |
| P61161 | <i>Actr2</i>    | Actin-related     | High   | 32 | 11 | 36 | 11 | 394  | 44.7  | 6.74  | 703  | 96.5  | 99.6  | 101.9 | 102.4 | 99.9  | 99.7  |
| O08586 | <i>Pten</i>     | Phosphatidylinos  | High   | 13 | 4  | 5  | 4  | 403  | 47.1  | 6.37  | 88   | 100.8 | 96.1  | 99.3  | 101.9 | 100.8 | 101.1 |
| P58774 | <i>Tpm2</i>     | Tropomyosin       | High   | 24 | 8  | 13 | 3  | 284  | 32.8  | 4.7   | 179  | 110.2 | 101.5 | 106.8 | 83.2  | 104.2 | 94.1  |
| P35550 | <i>Fbl</i>      | rRNA 2'-O-        | High   | 15 | 4  | 7  | 4  | 327  | 34.3  | 10.24 | 126  | 101.4 | 103.1 | 106.3 | 98.6  | 97.1  | 93.5  |
| Q8R3D1 | <i>Tbc1d13</i>  | TBC1 domain       | High   | 7  | 3  | 3  | 3  | 400  | 46.4  | 5.36  | 50   | 95.8  | 106.6 | 96.6  | 99.1  | 94.5  | 107.3 |
| Q6PGC1 | <i>Dhx29</i>    | ATP-dependent     | High   | 4  | 4  | 4  | 4  | 1365 | 153.9 | 7.94  | 30   | 101.4 | 104.7 | 94.6  | 96.8  | 101.6 | 100.9 |
| Q99K23 | <i>Ufsp2</i>    | Ufrm1-specific    | High   | 21 | 6  | 6  | 6  | 461  | 52.5  | 6.76  | 62   | 98.7  | 102.9 | 95.5  | 93.6  | 99.2  | 110.1 |
| P97823 | <i>Lypla1</i>   | Acyl-protein      | High   | 14 | 3  | 4  | 3  | 230  | 24.7  | 6.62  | 95   | 151.5 | 97.1  | 86.3  | 90.1  | 88.9  | 86.1  |
| Q9WVG6 | <i>Carm1</i>    | Histone-arginine  | High   | 4  | 3  | 3  | 3  | 608  | 65.8  | 6.77  | 48   | 102   | 102   | 99.9  | 98.7  | 100.4 | 97    |
| Q8C1B7 | <i>Septin11</i> | Septin-11         | High   | 45 | 17 | 50 | 7  | 431  | 49.7  | 6.68  | 1021 | 98.7  | 97.8  | 92.2  | 102.6 | 102.8 | 105.9 |
| P84099 | <i>Rpl19</i>    | 60S ribosomal     | High   | 22 | 4  | 5  | 4  | 196  | 23.5  | 11.47 | 69   | 102.3 | 96.3  | 101.8 | 102.9 | 98.1  | 98.6  |
| P60229 | <i>Eif3e</i>    | Eukaryotic        | High   | 27 | 10 | 16 | 10 | 445  | 52.2  | 6.04  | 337  | 103.3 | 103.2 | 103.2 | 97.3  | 94.6  | 98.4  |
| Q80XR2 | <i>Atp2c1</i>   | Calcium-          | High   | 7  | 5  | 6  | 5  | 918  | 100.2 | 6.83  | 91   | 97.3  | 97    | 95.6  | 99.4  | 107.1 | 103.6 |
| Q7TNF0 | <i>Doc2a</i>    | Double C2-like    | High   | 18 | 4  | 5  | 4  | 405  | 44.6  | 7.12  | 110  | 89.2  | 94.3  | 95.8  | 102.7 | 96.8  | 121.3 |
| Q60597 | <i>Ogdh</i>     | 2-oxoglutarate    | High   | 46 | 38 | 71 | 38 | 1023 | 116.4 | 6.83  | 1042 | 98.6  | 104.2 | 95.9  | 103   | 96.7  | 101.6 |
| P97808 | <i>Fxyd5</i>    | FXYD domain-      | Medium | 11 | 1  | 1  | 1  | 178  | 19.4  | 8.95  | 0    |       |       |       |       |       |       |
| Q8BTC1 | <i>Brawnin</i>  | Protein           | Medium | 10 | 1  | 1  | 1  | 67   | 7.5   | 8.21  | 17   | 96.1  | 98.2  | 89.2  | 101   | 97.7  | 117.9 |
| O08749 | <i>Dld</i>      | Dihydrolipoyl     | High   | 61 | 20 | 48 | 20 | 509  | 54.2  | 7.9   | 993  | 97.8  | 104.5 | 92    | 101.7 | 101.8 | 102.3 |
| Q3UKC1 | <i>Tax1bp1</i>  | Tax1-binding      | High   | 4  | 3  | 3  | 3  | 814  | 93.6  | 5.33  | 22   |       |       |       |       |       |       |
| Q8VHH5 | <i>Agap3</i>    | Arf-GAP with      | High   | 20 | 13 | 20 | 10 | 910  | 97.9  | 7.75  | 346  | 96.5  | 97.3  | 92.5  | 104   | 106.3 | 103.5 |
| Q80ZJ6 | <i>Zer1</i>     | Protein zer-1     | High   | 12 | 7  | 8  | 7  | 779  | 89    | 5.94  | 89   | 97.2  | 99.3  | 89.2  | 102.5 | 105.5 | 106.4 |
| O70200 | <i>Aif1</i>     | Allograft         | High   | 29 | 4  | 5  | 4  | 147  | 16.9  | 8.76  | 108  | 141.9 | 112.3 | 169.7 | 53.4  | 52.3  | 70.4  |
| A2AJI0 | <i>Map7d1</i>   | MAP7 domain-      | High   | 13 | 11 | 18 | 11 | 846  | 93.2  | 10.15 | 226  | 97.2  | 100.5 | 101.3 | 101.7 | 99.6  | 99.6  |
| Q921G7 | <i>Etfdh</i>    | Electron transfer | High   | 34 | 18 | 26 | 18 | 616  | 68    | 7.58  | 388  | 99.4  | 105   | 102   | 97.4  | 99    | 97.2  |
| Q8CCJ4 | <i>Amer2</i>    | APC membrane      | High   | 7  | 3  | 4  | 3  | 672  | 69.9  | 6.64  | 101  | 100.2 | 104.2 | 100   | 100.9 | 95.8  | 98.9  |
| Q8R4U1 | <i>Mypop</i>    | Myb-related       | High   | 6  | 1  | 1  | 1  | 393  | 41.9  | 10.21 | 22   | 84.3  | 86.3  | 103.6 | 103.5 | 122.5 | 99.7  |
| P06327 | <i>Gm5629</i>   | Ig heavy chain V  | Medium | 6  | 1  | 1  | 1  | 117  | 13    | 9.1   | 35   | 184.8 | 70.6  | 241.3 | 31.6  | 35.2  | 36.4  |
| Q99NA2 | <i>Atoh8</i>    | Protein atonal    | Low    | 4  | 1  | 1  | 1  | 322  | 34.8  | 10.1  | 0    | 93.4  | 97.1  | 100.9 | 100.6 | 103.4 | 104.6 |
| Q99JI6 | <i>Rap1b</i>    | Ras-related       | High   | 55 | 8  | 17 | 4  | 184  | 20.8  | 5.78  | 408  | 99.2  | 100.3 | 111.9 | 95    | 96.2  | 97.4  |
| Q4ACU6 | <i>Shank3</i>   | SH3 and multiple  | High   | 25 | 30 | 35 | 30 | 1730 | 185.3 | 8.88  | 435  | 94.8  | 99.6  | 86.8  | 108.1 | 105.2 | 105.5 |
| P63042 | <i>Stmn4</i>    | Stathmin-4        | Low    | 5  | 1  | 1  | 1  | 189  | 22.1  | 5.99  | 0    |       |       |       |       |       |       |
| Q8R4U7 | <i>Luzp1</i>    | Leucine zipper    | High   | 8  | 7  | 8  | 7  | 1068 | 119.2 | 7.99  | 91   | 93.1  | 101.5 | 90.3  | 105.4 | 105.5 | 104.2 |
| Q8C547 | <i>Heatr5b</i>  | HEAT repeat-      | High   | 3  | 4  | 4  | 4  | 2070 | 224.2 | 7.14  | 49   | 95.9  | 92.6  | 108.3 | 98.2  | 95.4  | 109.6 |
| Q80XA6 | <i>Reps2</i>    | RalBP1-           | High   | 13 | 6  | 7  | 5  | 521  | 57.7  | 7.53  | 86   | 97.6  | 98.2  | 94    | 102.5 | 103.5 | 104.1 |
| P61294 | <i>Rab6b</i>    | Ras-related       | High   | 57 | 10 | 32 | 4  | 208  | 23.4  | 5.53  | 712  | 92.4  | 96.2  | 85    | 105   | 112.1 | 109.3 |
| Q80ZJ7 | <i>Snx32</i>    | Sorting nexin-32  | High   | 11 | 4  | 5  | 4  | 404  | 46.6  | 6.96  | 73   | 100.9 | 98.4  | 90.8  | 102.4 | 102.1 | 105.4 |
| Q9R1E6 | <i>Enpp2</i>    | Ectonucleotide    | High   | 4  | 2  | 2  | 2  | 862  | 98.8  | 7.27  | 35   | 102.3 | 131.3 | 101.2 | 89.7  | 78    | 97.5  |
| Q8CBH5 | <i>Mfsd6</i>    | Major facilitator | Medium | 1  | 1  | 1  | 1  | 775  | 86    | 6.06  | 21   | 94.8  | 93.4  | 102.5 | 107.9 | 101.1 | 100.3 |
| Q3UGY8 | <i>Arfgef3</i>  | Brefeldin A-      | High   | 8  | 13 | 15 | 13 | 2170 | 239.9 | 5.88  | 254  | 96.3  | 102   | 91.9  | 104.7 | 101.1 | 104   |
| Q921F4 | <i>Hnrmp1l</i>  | Heterogeneous     | High   | 26 | 11 | 12 | 11 | 591  | 64.1  | 5.85  | 179  | 103.1 | 94.2  | 100   | 103.1 | 98.8  | 100.8 |
| Q3UFY7 | <i>Nt5c3b</i>   | 7-                | High   | 8  | 2  | 2  | 2  | 300  | 34.4  | 6.24  | 67   | 99.3  | 97.3  | 97    | 98.9  | 107.3 | 100.1 |
| P12849 | <i>Prkar1b</i>  | cAMP-             | High   | 28 | 10 | 14 | 6  | 381  | 43.2  | 5.96  | 240  | 109.7 | 96.5  | 116.8 | 92.3  | 92.3  | 92.5  |
| Q8C008 | <i>Dzank1</i>   | Double zinc       | High   | 9  | 6  | 7  | 6  | 778  | 85    | 8.18  | 119  | 98.5  | 97.2  | 96.4  | 100.6 | 102.6 | 104.7 |
| Q91YQ5 | <i>Rpn1</i>     | Dolichyl-         | High   | 27 | 15 | 22 | 15 | 608  | 68.5  | 6.46  | 408  | 101.4 | 100.8 | 108.7 | 94.9  | 97.4  | 96.8  |
| A2A6Q5 | <i>Cdc27</i>    | Cell division     | High   | 2  | 1  | 1  | 1  | 825  | 91.8  | 7.02  | 31   |       |       |       |       |       |       |
| Q9WV54 | <i>Asah1</i>    | Acid ceramidase   | High   | 13 | 5  | 6  | 5  | 394  | 44.6  | 8.46  | 94   | 111.6 | 105.2 | 109.2 | 89.9  | 91.8  | 92.3  |
| E9Q4P1 | <i>Wdfy1</i>    | WD repeat and     | High   | 21 | 7  | 8  | 7  | 410  | 46.2  | 7.34  | 97   | 99.3  | 90.2  | 102.5 | 103.6 | 99.4  | 105   |
| P14231 | <i>Atp1b2</i>   | Sodium/potassiu   | High   | 41 | 12 | 22 | 12 | 290  | 33.3  | 8.31  | 281  | 93.1  | 95.3  | 103.2 | 108.8 | 97    | 102.5 |
| Q3VOK9 | <i>Pls1</i>     | Plastin-1         | High   | 10 | 6  | 8  | 2  | 630  | 70.4  | 5.38  | 134  | 102.2 | 113.7 | 96.5  | 93.9  | 100.5 | 93.2  |
| Q5FW60 | <i>Mup20</i>    | Major urinary     | High   | 11 | 2  | 2  | 1  | 181  | 20.9  | 4.89  | 30   | 107.3 | 89.1  | 135   | 86    | 92.1  | 90.6  |
| Q8C078 | <i>Camkk2</i>   | Calcium/calmod    | High   | 25 | 14 | 17 | 14 | 588  | 64.6  | 5.9   | 176  | 91.9  | 105.6 | 78.8  | 110.9 | 107.5 | 105.3 |
| Q8BFR4 | <i>Gns</i>      | N-                | High   | 6  | 3  | 4  | 3  | 544  | 61.1  | 8.24  | 44   | 98.7  | 93.7  | 108.3 | 100.5 | 100.9 | 97.8  |
| Q7TSS2 | <i>Ube2q1</i>   | Ubiquitin-        | High   | 11 | 5  | 5  | 5  | 422  | 46.1  | 5.1   | 52   | 103.7 | 101.7 | 102.9 | 98.1  | 94.4  | 99.2  |
| Q8BGU5 | <i>Ccny</i>     | Cyclin-Y          | High   | 28 | 7  | 9  | 7  | 341  | 39.4  | 7.2   | 185  | 92.8  | 97.6  | 94.2  | 106.2 | 106.6 | 102.6 |
| P23953 | <i>Ces1c</i>    | Carboxylesteras   | High   | 25 | 12 | 17 | 12 | 554  | 61    | 5.06  | 307  | 177   | 61.3  | 225.7 | 43.8  | 46.4  | 45.8  |
| Q499X9 | <i>Mars2</i>    | Methionine--      | High   | 6  | 2  | 2  | 2  | 586  | 65.8  | 8.09  | 31   | 86.4  | 112   | 83    | 99.8  | 105.5 | 113.3 |
| Q8ROA7 | <i>Kiaa0513</i> | Uncharacterized   | High   | 30 | 12 | 16 | 12 | 407  | 46.3  | 5.02  | 300  | 99    | 101.6 | 95.9  | 102.5 | 102   | 99    |
| Q62077 | <i>Plcg1</i>    | 1-                | High   | 12 | 12 | 13 | 12 | 1302 | 149.6 | 5.8   | 152  | 96.1  | 100.5 | 91    | 100.7 | 104.5 | 107.1 |

|        |                 |                   |        |    |    |     |    |      |       |      |      |       |       |       |       |       |       |
|--------|-----------------|-------------------|--------|----|----|-----|----|------|-------|------|------|-------|-------|-------|-------|-------|-------|
| P61022 | <i>Chp1</i>     | Calcineurin B     | High   | 29 | 4  | 8   | 4  | 195  | 22.4  | 5.1  | 108  | 96.8  | 98.7  | 94    | 100.7 | 104.7 | 105   |
| O08688 | <i>Capn5</i>    | Calpain-5         | High   | 24 | 12 | 16  | 12 | 640  | 72.9  | 7.36 | 221  | 92.9  | 96.2  | 98.5  | 101.4 | 106.7 | 104.4 |
| Q9QW16 | <i>Srcin1</i>   | SRC kinase        | High   | 46 | 50 | 77  | 50 | 1250 | 134.8 | 9.32 | 1327 | 94.6  | 97.1  | 91.2  | 105.7 | 107.6 | 103.8 |
| Q9JI59 | <i>Jam2</i>     | Junctional        | Low    | 3  | 1  | 1   | 1  | 298  | 33    | 8.4  | 18   |       |       |       |       |       |       |
| P18653 | <i>Rps6ka1</i>  | Ribosomal         | High   | 11 | 7  | 7   | 1  | 724  | 81.5  | 8.1  | 64   |       |       |       |       |       |       |
| Q9ERK4 | <i>Cse1l</i>    | Exportin-2        | High   | 26 | 21 | 33  | 21 | 971  | 110.4 | 5.77 | 511  | 101.4 | 101.3 | 102.8 | 100.5 | 95.3  | 98.8  |
| Q6NXK7 | <i>Dpp10</i>    | Inactive          | High   | 33 | 25 | 38  | 23 | 797  | 90.8  | 6.48 | 473  | 95.1  | 101.9 | 91.1  | 104.8 | 103.6 | 103.6 |
| Q9CZD3 | <i>Gars1</i>    | Glycine--tRNA     | High   | 27 | 16 | 22  | 16 | 729  | 81.8  | 6.65 | 289  | 100.7 | 102.2 | 99.3  | 94.8  | 100.2 | 102.9 |
| P62874 | <i>Gnb1</i>     | Guanine           | High   | 49 | 13 | 76  | 8  | 340  | 37.4  | 6    | 1925 | 93.8  | 98.4  | 99.1  | 107.3 | 99    | 102.3 |
| Q9CQU0 | <i>Txndc12</i>  | Thioredoxin       | High   | 35 | 5  | 6   | 5  | 170  | 19    | 5.26 | 50   | 105   | 99.8  | 109.5 | 98    | 93.1  | 94.5  |
| Q80TN5 | <i>Zdhhc17</i>  | Palmitoyltransfer | High   | 4  | 3  | 3   | 3  | 632  | 72.6  | 7.39 | 54   | 95.4  | 99    | 99.8  | 107.8 | 97.2  | 100.8 |
| P45591 | <i>Cfl2</i>     | Cofilin-2         | High   | 75 | 12 | 29  | 10 | 166  | 18.7  | 7.88 | 562  | 99    | 97.7  | 94.8  | 103.9 | 104.7 | 99.8  |
| Q80Z38 | <i>Shank2</i>   | SH3 and multiple  | High   | 32 | 37 | 51  | 36 | 1476 | 158.9 | 7.18 | 635  | 100.2 | 95.6  | 94.8  | 103.9 | 102.6 | 102.9 |
| Q8R010 | <i>Aimp2</i>    | Aminoacyl tRNA    | High   | 15 | 4  | 4   | 4  | 320  | 35.4  | 7.83 | 79   | 100.5 | 99.3  | 104.2 | 99.4  | 98.8  | 97.7  |
| P24457 | <i>Cyp2d11</i>  | Cytochrome        | High   | 3  | 1  | 1   | 1  | 504  | 57    | 6.25 | 15   | 96.4  | 107.2 | 91.7  | 102.8 | 101.1 | 100.7 |
| A2ADY9 | <i>Ddi2</i>     | Protein DDI1      | High   | 20 | 5  | 6   | 5  | 399  | 44.6  | 5.05 | 114  | 100.4 | 101   | 99    | 97.7  | 100.5 | 101.4 |
| Q4QQM5 | <i>Miga1</i>    | Mitoguardin 1     | Medium | 4  | 1  | 1   | 1  | 600  | 67.5  | 5.48 | 13   | 92.5  | 105.6 | 94.4  | 95.9  | 102.3 | 109.3 |
| P28653 | <i>Bgn</i>      | Biglycan          | Low    | 4  | 1  | 1   | 1  | 369  | 41.6  | 7.27 | 19   | 108.1 | 95    | 82.5  | 97.4  | 110.3 | 106.8 |
| Q8VCG4 | <i>C8g</i>      | Complement        | High   | 14 | 2  | 2   | 2  | 202  | 22.5  | 9.25 | 25   | 123.3 | 89.9  | 134.3 | 87.9  | 80.8  | 83.8  |
| P22315 | <i>Fech</i>     | Ferrochelataase,  | High   | 40 | 12 | 18  | 12 | 420  | 47.1  | 8.91 | 195  | 99.1  | 101.3 | 100.4 | 98    | 100.2 | 101.1 |
| P62137 | <i>Ppp1ca</i>   | Serine/threonine  | High   | 52 | 14 | 33  | 3  | 330  | 37.5  | 6.33 | 573  | 96.7  | 98.9  | 91.3  | 103.5 | 105.7 | 103.9 |
| P62281 | <i>Rps11</i>    | 40S ribosomal     | High   | 48 | 8  | 11  | 8  | 158  | 18.4  | 10.3 | 176  | 102.3 | 101.1 | 105.8 | 99.8  | 96.1  | 95    |
| Q9CWX9 | <i>Ddx47</i>    | Probable ATP-     | High   | 5  | 2  | 2   | 2  | 455  | 50.6  | 9.1  | 22   |       |       |       |       |       |       |
| Q8QZR5 | <i>Gpt</i>      | Alanine           | High   | 8  | 2  | 2   | 2  | 496  | 55.1  | 6.64 | 67   | 97.7  | 109.8 | 70.5  | 94.7  | 121.6 | 105.7 |
| Q07797 | <i>Lgals3bp</i> | Galectin-3-       | High   | 7  | 3  | 3   | 3  | 577  | 64.5  | 5.14 | 64   | 117.5 | 107.8 | 114.1 | 87.3  | 82    | 91.3  |
| Q8K596 | <i>Slc8a2</i>   | Sodium/calcium    | High   | 31 | 22 | 43  | 21 | 921  | 100.6 | 5.12 | 722  | 95.2  | 99.4  | 90.2  | 106.6 | 105.7 | 102.9 |
| Q7TSZ8 | <i>Nacc1</i>    | Nucleus           | High   | 3  | 1  | 1   | 1  | 514  | 56.5  | 5.73 | 59   | 95.5  | 99.2  | 93.4  | 99    | 107   | 105.9 |
| Q9Z1W8 | <i>Atp12a</i>   | Potassium-        | High   | 8  | 8  | 49  | 1  | 1035 | 114.7 | 6.33 | 589  | 89.7  | 89.5  | 102.8 | 112.3 | 102.2 | 103.5 |
| P08905 | <i>Lyz2</i>     | Lysozyme C-2      | High   | 36 | 4  | 5   | 4  | 148  | 16.7  | 8.81 | 136  | 150.3 | 93.6  | 253.9 | 32.8  | 34.4  | 35    |
| P29391 | <i>Ftl1</i>     | Ferritin light    | High   | 56 | 7  | 11  | 7  | 183  | 20.8  | 6    | 160  | 120.2 | 104.4 | 146.6 | 76.3  | 75.6  | 76.8  |
| Q99JG2 | <i>Gpr37l1</i>  | G-protein         | High   | 4  | 2  | 2   | 2  | 481  | 52.7  | 7.36 | 23   | 90.8  | 113.7 | 92.6  | 105.5 | 97.7  | 99.6  |
| Q8CC27 | <i>Cacnb2</i>   | Voltage-          | High   | 6  | 4  | 7   | 1  | 655  | 73.1  | 8.47 | 73   |       |       |       |       |       |       |
| P60843 | <i>Eif4a1</i>   | Eukaryotic        | High   | 49 | 16 | 29  | 7  | 406  | 46.1  | 5.48 | 576  | 106.8 | 106.4 | 108.8 | 97.5  | 88.1  | 92.5  |
| Q9QZC2 | <i>Plxnc1</i>   | Plexin-C1         | High   | 7  | 9  | 9   | 9  | 1574 | 176.4 | 7.75 | 151  | 91.6  | 91.4  | 90.6  | 94.6  | 108.4 | 123.4 |
| Q8CI71 | <i>Vps50</i>    | Syndetin          | High   | 17 | 14 | 18  | 14 | 964  | 111.1 | 6.07 | 315  | 96.9  | 97.8  | 92.4  | 103.1 | 103.5 | 106.3 |
| Q3UQ84 | <i>Tars2</i>    | Threonine--tRNA   | High   | 6  | 3  | 3   | 3  | 723  | 81.6  | 7.87 | 85   | 101.2 | 92.5  | 93.6  | 98.8  | 106.9 | 107.1 |
| F6W8I0 | <i>Yjefn3</i>   | YjeF N-terminal   | High   | 5  | 1  | 1   | 1  | 251  | 27    | 7.4  | 43   | 95    | 90.9  | 107.5 | 101.3 | 105.3 | 100   |
| P60879 | <i>Snap25</i>   | Synaptosomal-     | High   | 74 | 17 | 62  | 16 | 206  | 23.3  | 4.77 | 1282 | 98.7  | 106.5 | 96.6  | 99.4  | 98.9  | 99.8  |
| Q925F2 | <i>Esam</i>     | Endothelial cell- | High   | 9  | 2  | 2   | 2  | 394  | 41.8  | 9.26 | 15   | 97.8  | 94.6  | 99.3  | 99.2  | 97.5  | 111.6 |
| Q91XD7 | <i>Creld1</i>   | Protein disulfide | High   | 14 | 5  | 8   | 5  | 420  | 45.7  | 5.02 | 150  | 92.2  | 96.8  | 99.2  | 106.4 | 98.5  | 106.9 |
| Q78IK4 | <i>Apool</i>    | MICOS complex     | High   | 16 | 4  | 4   | 4  | 265  | 29.2  | 9.31 | 74   | 103.5 | 109.9 | 108.3 | 93.6  | 94.7  | 90    |
| Q91V81 | <i>Rbm42</i>    | RNA-binding       | Medium | 4  | 1  | 1   | 1  | 478  | 50.2  | 9.63 | 0    | 101.7 | 84.4  | 121.3 | 94.1  | 92.4  | 106.2 |
| D3YZ19 | <i>Pgbd5</i>    | PiggyBac          | High   | 11 | 5  | 6   | 5  | 523  | 58.3  | 8.85 | 117  | 106.8 | 100   | 109.9 | 98    | 94.8  | 90.4  |
| P46061 | <i>Rangap1</i>  | Ran GTPase-       | High   | 28 | 14 | 21  | 14 | 589  | 63.5  | 4.68 | 434  | 96.8  | 100.4 | 100.7 | 99.1  | 101.9 | 101   |
| O55126 | <i>Nipsnap2</i> | Protein NipSnap   | High   | 33 | 9  | 15  | 9  | 281  | 32.9  | 9.26 | 150  | 97.2  | 104.3 | 93.7  | 103.8 | 103.1 | 98    |
| Q3UMB9 | <i>Washc4</i>   | WASH complex      | High   | 3  | 3  | 4   | 3  | 1173 | 136.3 | 7.37 | 44   | 90    | 92.4  | 101.8 | 104.8 | 114.6 | 96.3  |
| Q62048 | <i>Pea15</i>    | Astrocytic        | High   | 71 | 8  | 20  | 8  | 130  | 15    | 5.02 | 395  | 101.4 | 98.4  | 103.4 | 96.7  | 99.4  | 100.7 |
| Q6P5H2 | <i>Nes</i>      | Nestin OS=Mus     | High   | 1  | 2  | 2   | 2  | 1864 | 207   | 4.34 | 21   | 106.2 | 104.6 | 104.1 | 93    | 94.4  | 97.7  |
| Q64337 | <i>Sqstm1</i>   | Sequestosome-1    | High   | 12 | 3  | 4   | 3  | 442  | 48.1  | 5.21 | 36   | 97.8  | 99.6  | 89.1  | 107.5 | 103.7 | 102.3 |
| Q8BLF1 | <i>Nceh1</i>    | Neutral           | High   | 20 | 8  | 13  | 8  | 408  | 45.7  | 7.05 | 150  | 97.3  | 102.6 | 93.1  | 106.6 | 101.6 | 98.9  |
| Q9D924 | <i>Isca1</i>    | Iron-sulfur       | High   | 39 | 4  | 5   | 4  | 129  | 14.2  | 9.07 | 131  | 94.6  | 94.1  | 90.1  | 111.2 | 99.4  | 110.6 |
| P23475 | <i>Xrcc6</i>    | X-ray repair      | High   | 2  | 1  | 1   | 1  | 608  | 69.4  | 6.79 | 37   | 103.8 | 103.9 | 118.8 | 77.3  | 98.6  | 97.7  |
| Q6A0A2 | <i>Larp4b</i>   | La-related        | High   | 2  | 1  | 1   | 1  | 741  | 81.6  | 7.49 | 34   | 95.6  | 92.6  | 98.8  | 101.8 | 124.5 | 86.7  |
| Q9CPT4 | <i>Mydgf</i>    | Myeloid-derived   | High   | 13 | 2  | 3   | 2  | 166  | 18    | 6.79 | 87   | 103   | 100.5 | 108.5 | 91.7  | 95.4  | 100.9 |
| Q9JJV2 | <i>Pfn2</i>     | Profilin-2        | High   | 47 | 7  | 18  | 7  | 140  | 15    | 6.99 | 386  | 89.1  | 95.8  | 90.3  | 99.5  | 109.6 | 115.7 |
| Q8BJ03 | <i>Cox15</i>    | Cytochrome c      | High   | 11 | 3  | 3   | 3  | 413  | 45.8  | 9.79 | 54   | 95.7  | 98.4  | 93.7  | 96.3  | 110.4 | 105.6 |
| Q3TWN3 | <i>Cnm2</i>     | Metal transporter | High   | 4  | 3  | 5   | 2  | 875  | 96.6  | 6.21 | 59   | 97.1  | 96.1  | 92.4  | 104   | 105.8 | 104.5 |
| Q8R0P4 | <i>Aamdc</i>    | Mth938 domain-    | High   | 38 | 4  | 4   | 4  | 122  | 13.2  | 7.99 | 26   | 82.6  | 97.5  | 95.5  | 97.1  | 107.7 | 119.6 |
| Q9JI19 | <i>Fibp</i>     | Acidic fibroblast | High   | 20 | 6  | 7   | 6  | 357  | 41.2  | 6.76 | 87   | 99.7  | 99    | 95.8  | 102.1 | 101.2 | 102.1 |
| P26350 | <i>Ptma</i>     | Prothymosin       | High   | 25 | 2  | 4   | 2  | 111  | 12.2  | 3.79 | 110  | 104.1 | 103.2 | 113.7 | 87.7  | 95.5  | 95.8  |
| Q9QZH6 | <i>Ecsit</i>    | Evolutionarily    | High   | 12 | 4  | 4   | 4  | 435  | 49.8  | 6.6  | 34   | 94.9  | 107.9 | 100.4 | 96.5  | 102.9 | 97.4  |
| Q03265 | <i>Atp5f1a</i>  | ATP synthase      | High   | 54 | 29 | 234 | 29 | 553  | 59.7  | 9.19 | 5851 | 95.7  | 103.6 | 89.5  | 102.8 | 105.5 | 102.8 |
| Q8VE22 | <i>Mrps23</i>   | 28S ribosomal     | High   | 37 | 6  | 8   | 6  | 177  | 20.3  | 8.59 | 137  | 100.4 | 102.1 | 93.4  | 102   | 100.1 | 102.1 |
| Q9WTX2 | <i>Prkra</i>    | Interferon-       | High   | 5  | 1  | 1   | 1  | 313  | 34.3  | 8.43 | 32   | 108.1 | 106.1 | 107.1 | 84.3  | 101.4 | 92.9  |
| Q8VI59 | <i>Pcnx3</i>    | Pecanex-like      | Low    | 0  | 1  | 1   | 1  | 2028 | 221.4 | 6.62 | 0    | 101.8 | 109.8 | 93.4  | 105.5 | 94.7  | 94.8  |
| Q9CQP2 | <i>Trappc2</i>  | Trafficking       | Medium | 5  | 1  | 1   | 1  | 140  | 16.4  | 6.52 | 37   | 102.6 | 109.5 | 87    | 95.4  | 99.3  | 106.2 |
| Q99PI8 | <i>Rtn4r</i>    | Reticulon-4       | Low    | 5  | 1  | 1   | 1  | 473  | 51    | 8.69 | 0    |       |       |       |       |       |       |
| Q9ET43 | <i>Cldn12</i>   | Claudin-12        | High   | 11 | 2  | 4   | 2  | 244  | 27    | 8.47 | 80   | 96.2  | 98.6  | 95    | 101.2 | 98.5  | 110.5 |

|        |                 |                     |        |    |    |    |    |      |       |       |      |       |       |       |       |       |       |
|--------|-----------------|---------------------|--------|----|----|----|----|------|-------|-------|------|-------|-------|-------|-------|-------|-------|
| Q6PAM0 | <i>Prkab2</i>   | 5'-AMP-activated    | High   | 7  | 1  | 1  | 1  | 271  | 30.2  | 6.46  | 15   | 96.6  | 101.9 | 97.7  | 101   | 97.9  | 104.8 |
| Q62108 | <i>Dlg4</i>     | Disks large         | High   | 44 | 27 | 54 | 24 | 724  | 80.4  | 5.87  | 1344 | 93.3  | 99.8  | 86.7  | 109.8 | 106.5 | 103.9 |
| P70441 | <i>Slc9a3r1</i> | Na(+)/H(+)          | High   | 29 | 9  | 16 | 9  | 355  | 38.6  | 5.9   | 179  | 98    | 103.1 | 99.1  | 98.9  | 101.3 | 99.6  |
| Q3UHD3 | <i>Mtus2</i>    | Microtubule-        | High   | 2  | 2  | 2  | 2  | 1353 | 147.3 | 8.24  | 44   | 103.7 | 99.7  | 109.9 | 94.3  | 93.7  | 98.7  |
| O70161 | <i>Pip5k1c</i>  | Phosphatidylinos    | High   | 34 | 14 | 28 | 13 | 661  | 72.4  | 5.59  | 575  | 98.1  | 101.4 | 94.7  | 104.6 | 99.6  | 101.6 |
| Q80VQ0 | <i>Aldh3b1</i>  | Aldehyde            | High   | 13 | 5  | 5  | 5  | 468  | 52.3  | 7.55  | 42   | 112   | 107.6 | 101.9 | 94.5  | 98.8  | 85.3  |
| B1AS29 | <i>Grik3</i>    | Glutamate           | High   | 5  | 3  | 5  | 2  | 919  | 104   | 7.52  | 105  | 93.4  | 96.8  | 90.7  | 109.2 | 105.4 | 104.5 |
| Q0KK55 | <i>Kndc1</i>    | Kinase non-         | High   | 1  | 1  | 1  | 1  | 1742 | 191.2 | 6.3   | 41   | 101.3 | 94    | 88    | 109.5 | 99    | 108.2 |
| O55023 | <i>Impa1</i>    | Inositol            | High   | 50 | 13 | 22 | 13 | 277  | 30.4  | 5.19  | 355  | 99.2  | 102.1 | 99.1  | 100.8 | 99    | 99.6  |
| P20108 | <i>Prdx3</i>    | Thioredoxin-        | High   | 32 | 6  | 17 | 6  | 257  | 28.1  | 7.58  | 451  | 97.7  | 99.4  | 99    | 98.1  | 104.7 | 101.1 |
| Q3UJV1 | <i>Ccdc61</i>   | Centrosomal         | Low    | 1  | 1  | 1  | 1  | 511  | 57.3  | 10.49 | 21   |       |       |       |       |       |       |
| Q8CI96 | <i>Clip4</i>    | CAP-Gly             | Medium | 3  | 1  | 1  | 1  | 704  | 75.7  | 8.62  | 0    |       |       |       |       |       |       |
| Q9ERT9 | <i>Ppp1r1a</i>  | Protein             | High   | 25 | 3  | 3  | 3  | 171  | 18.7  | 5.25  | 75   | 96.6  | 100.3 | 103.1 | 93.4  | 106.4 | 100.1 |
| Q8K2X3 | <i>Stn1</i>     | CST complex         | Medium | 2  | 1  | 1  | 1  | 378  | 43.5  | 5.77  | 19   | 103.3 | 99    | 97.4  | 103.1 | 96.1  | 101.2 |
| P35288 | <i>Rab23</i>    | Ras-related         | High   | 30 | 6  | 8  | 6  | 237  | 26.7  | 6.79  | 155  | 90.7  | 102.5 | 93.7  | 107.2 | 103.9 | 102.1 |
| P09813 | <i>Apoa2</i>    | Apolipoprotein      | High   | 19 | 2  | 3  | 2  | 102  | 11.3  | 7.18  | 79   | 204.1 | 44.5  | 289.7 | 16.1  | 23.4  | 22.2  |
| Q9WUU7 | <i>Ctsz</i>     | Cathepsin Z         | High   | 17 | 4  | 5  | 4  | 306  | 34    | 6.6   | 67   | 134   | 105.1 | 162.6 | 65.5  | 69.3  | 63.6  |
| Q99MV1 | <i>Tdrd1</i>    | Tudor domain-       | Medium | 1  | 1  | 1  | 1  | 1172 | 129.6 | 5.81  | 0    | 143.9 | 117.7 | 159.3 | 57.9  | 62    | 59.2  |
| P06537 | <i>Nr3c1</i>    | Glucocorticoid      | High   | 4  | 2  | 2  | 2  | 783  | 86    | 6.35  | 27   | 90.8  | 104.3 | 96    | 103.4 | 105.7 | 99.8  |
| Q9QWW1 | <i>Homer2</i>   | Homer protein       | High   | 17 | 6  | 7  | 5  | 354  | 40.5  | 6.01  | 89   | 93.5  | 94    | 98.7  | 102   | 108.5 | 103.5 |
| Q60673 | <i>Ptpn</i>     | Receptor-type       | High   | 5  | 3  | 4  | 3  | 979  | 106   | 7.09  | 112  | 101.2 | 100.1 | 106.7 | 95.8  | 96.3  | 99.9  |
| P63318 | <i>Prkcg</i>    | Protein kinase C    | High   | 52 | 27 | 50 | 24 | 697  | 78.3  | 7.46  | 757  | 89.9  | 92    | 93.5  | 104.7 | 110.2 | 109.7 |
| Q80Z10 | <i>Astn2</i>    | Astrotactin-2       | High   | 1  | 1  | 2  | 1  | 1352 | 149.3 | 6.07  | 65   | 102.4 | 96.8  | 100.6 | 100   | 98.5  | 101.8 |
| Q9CQ79 | <i>Txndc9</i>   | Thioredoxin         | High   | 16 | 4  | 4  | 4  | 226  | 26.2  | 5.95  | 64   | 103.2 | 101.5 | 108.4 | 94.6  | 96.5  | 95.7  |
| Q5FWK3 | <i>Arhgap1</i>  | Rho GTPase-         | High   | 31 | 12 | 18 | 12 | 439  | 50.4  | 6.44  | 271  | 96.1  | 95.2  | 98    | 102.3 | 104.3 | 104.1 |
| Q9ROA0 | <i>Pex14</i>    | Peroxisomal         | High   | 10 | 3  | 4  | 3  | 376  | 41.2  | 5.11  | 93   | 96.5  | 95.3  | 97.1  | 107.1 | 105.7 | 98.4  |
| Q91YL2 | <i>Rnf126</i>   | E3 ubiquitin-       | High   | 4  | 1  | 1  | 1  | 313  | 34.1  | 5.17  | 35   | 104.2 | 102.4 | 106.2 | 97.7  | 86.5  | 103   |
| Q9DCJ9 | <i>Npl</i>      | N-                  | High   | 16 | 5  | 6  | 5  | 320  | 35.1  | 8.03  | 82   | 114.1 | 99.7  | 132.1 | 83.9  | 88.4  | 81.9  |
| Q9DBJ1 | <i>Pgam1</i>    | Phosphoglycerat     | High   | 73 | 16 | 73 | 12 | 254  | 28.8  | 7.18  | 1405 | 95.4  | 100.3 | 95    | 104.4 | 102.7 | 102.2 |
| Q8K2C6 | <i>Sirt5</i>    | NAD-dependent       | High   | 4  | 1  | 1  | 1  | 310  | 34.1  | 8.53  | 57   | 101.3 | 110.9 | 96.5  | 96.9  | 94.2  | 100.1 |
| E9PV24 | <i>Fga</i>      | Fibrinogen alpha    | High   | 18 | 14 | 29 | 14 | 789  | 87.4  | 6.11  | 478  | 209.1 | 61    | 205.9 | 38.4  | 42.1  | 43.6  |
| Q8CGF6 | <i>Wdr47</i>    | WD repeat-          | High   | 26 | 17 | 20 | 17 | 920  | 102.2 | 5.97  | 267  | 95.3  | 100   | 101.8 | 99.3  | 101.5 | 102   |
| Q6ZWU9 | <i>Rps27</i>    | 40S ribosomal       | High   | 29 | 2  | 4  | 2  | 84   | 9.5   | 9.45  | 81   | 101.6 | 98.2  | 105.8 | 94.9  | 103.2 | 96.3  |
| Q811P8 | <i>Arhgap32</i> | Rho GTPase-         | High   | 7  | 12 | 12 | 12 | 2089 | 229.6 | 6.86  | 164  | 97.2  | 99    | 84.1  | 108.1 | 105   | 106.5 |
| Q8BRT1 | <i>Clasp2</i>   | CLIP-associating    | High   | 37 | 38 | 55 | 32 | 1286 | 140.7 | 8.63  | 812  | 95.8  | 98.9  | 95.7  | 105.7 | 101.6 | 102.2 |
| Q91WG4 | <i>Elp2</i>     | Elongator           | High   | 6  | 4  | 4  | 4  | 831  | 93    | 5.82  | 43   | 104.5 | 102.1 | 113.6 | 90.7  | 97.1  | 92    |
| Q91YE8 | <i>Synpo2</i>   | Synaptopodin-2      | High   | 2  | 1  | 1  | 1  | 1087 | 116.5 | 7.37  | 14   |       |       |       |       |       |       |
| P19536 | <i>Cox5b</i>    | Cytochrome c        | High   | 53 | 6  | 22 | 6  | 128  | 13.8  | 8.38  | 325  | 96.4  | 104   | 88.2  | 103.9 | 107.5 | 99.9  |
| Q8VEB4 | <i>Pla2g15</i>  | Phospholipase       | High   | 9  | 3  | 3  | 3  | 412  | 47.3  | 6.47  | 21   | 100.6 | 96.5  | 96.5  | 99.2  | 108   | 99.1  |
| Q7TMQ7 | <i>Wdr91</i>    | WD repeat-          | High   | 5  | 3  | 3  | 3  | 748  | 83.4  | 6.64  | 41   | 97.7  | 97.8  | 105.2 | 99.1  | 96.9  | 103.3 |
| Q8VDM6 | <i>Hnmpul1</i>  | Heterogeneous       | High   | 8  | 5  | 5  | 5  | 859  | 95.9  | 6.58  | 81   | 98.4  | 102.5 | 102   | 104.4 | 96.7  | 95.9  |
| Q6A0A9 | <i>FAM120A</i>  | Constitutive        | High   | 12 | 11 | 16 | 10 | 1112 | 121.6 | 8.92  | 211  | 98.2  | 101.8 | 99.5  | 97.9  | 95.8  | 106.8 |
| Q3TUA9 | <i>Pomk</i>     | Protein O-          | High   | 3  | 1  | 1  | 1  | 349  | 39.9  | 6.62  | 19   | 107.2 | 104   | 90.6  | 97.8  | 102.7 | 97.8  |
| Q9D8Y0 | <i>Efh2</i>     | EF-hand             | High   | 42 | 11 | 29 | 11 | 240  | 26.8  | 5.06  | 460  | 106.1 | 105.5 | 104.3 | 96    | 95.7  | 92.4  |
| Q9JHJ0 | <i>Tmod3</i>    | Tropomodulin-3      | High   | 17 | 5  | 8  | 4  | 352  | 39.5  | 5.14  | 122  | 108.6 | 112   | 126   | 76.6  | 86.7  | 90.2  |
| Q8R5J9 | <i>Arl6ip5</i>  | PRA1 family         | High   | 29 | 6  | 13 | 6  | 188  | 21.5  | 9.61  | 285  | 98.3  | 100.6 | 95.7  | 103.8 | 102.8 | 98.8  |
| Q99LX0 | <i>Park7</i>    | Parkinson           | High   | 59 | 12 | 37 | 12 | 189  | 20    | 6.77  | 580  | 100.1 | 103   | 99.9  | 98.3  | 99.8  | 99    |
| Q6P1D5 | <i>Sez6l</i>    | Seizure 6-like      | High   | 4  | 2  | 5  | 2  | 963  | 104.8 | 4.69  | 77   | 94.2  | 98.2  | 96.2  | 102.5 | 98.9  | 110   |
| Q2TPA8 | <i>Hsd12</i>    | Hydroxysteroid      | High   | 9  | 4  | 6  | 4  | 490  | 54.2  | 6.74  | 104  | 96.5  | 104.8 | 99.7  | 100.2 | 100.6 | 98.3  |
| Q64455 | <i>Ptprj</i>    | Receptor-type       | High   | 5  | 5  | 5  | 5  | 1238 | 136.7 | 5.57  | 84   | 103.5 | 99.6  | 96    | 102.5 | 100.4 | 97.9  |
| Q8BLQ9 | <i>Cadm2</i>    | Cell adhesion       | High   | 29 | 9  | 23 | 9  | 435  | 47.5  | 5.41  | 458  | 95.3  | 109.2 | 85.7  | 106.1 | 102.5 | 101   |
| Q8BLU0 | <i>Flrt2</i>    | Leucine-rich        | High   | 2  | 1  | 1  | 1  | 660  | 73.9  | 7.91  | 36   |       |       |       |       |       |       |
| O89050 | <i>Mkln1</i>    | Muskelin            | High   | 4  | 2  | 2  | 2  | 735  | 84.8  | 6.34  | 24   | 97.3  | 100.3 | 87.8  | 105.6 | 98.8  | 110.2 |
| Q80UW2 | <i>Fbxo2</i>    | F-box only          | High   | 42 | 9  | 16 | 9  | 297  | 33.7  | 4.28  | 320  | 101.2 | 102.4 | 102   | 97.9  | 96.9  | 99.6  |
| Q8R313 | <i>Exoc6</i>    | Exocyst complex     | High   | 6  | 3  | 3  | 3  | 802  | 93    | 6.15  | 43   | 88    | 101.6 | 87.4  | 85.5  | 116.5 | 121   |
| Q8BJH1 | <i>Zc2hc1a</i>  | Zinc finger         | High   | 24 | 7  | 11 | 7  | 324  | 35.1  | 9.88  | 196  | 92.5  | 95.8  | 90.1  | 108   | 109.4 | 104.1 |
| Q80U57 | <i>Rims3</i>    | Regulating          | High   | 17 | 3  | 4  | 3  | 307  | 32.6  | 9.29  | 118  | 105.3 | 99    | 86.8  | 102.7 | 102.3 | 103.9 |
| Q5SUF2 | <i>Luc7l3</i>   | Luc7-like protein   | High   | 7  | 3  | 5  | 3  | 432  | 51.4  | 9.77  | 231  | 101.8 | 106.9 | 92.1  | 98.7  | 102.8 | 97.7  |
| Q9ROP9 | <i>Uchl1</i>    | Ubiquitin           | High   | 67 | 13 | 51 | 13 | 223  | 24.8  | 5.24  | 665  | 100.4 | 97.9  | 103.4 | 97.6  | 100.1 | 100.6 |
| Q922Y1 | <i>Ubxn1</i>    | UBX domain-         | High   | 21 | 5  | 8  | 5  | 297  | 33.6  | 5.26  | 153  | 100.4 | 101.2 | 101.1 | 96.9  | 101.2 | 99.2  |
| P46660 | <i>Ina</i>      | Alpha-internexin    | High   | 62 | 33 | 72 | 29 | 501  | 55.3  | 5.4   | 1191 | 100.4 | 115.8 | 90.9  | 98.7  | 96.6  | 97.6  |
| P56501 | <i>Ucp3</i>     | Mitochondrial       | Low    | 10 | 1  | 1  | 1  | 308  | 33.9  | 9.55  | 0    |       |       |       |       |       |       |
| Q9CZR8 | <i>Tsfn</i>     | Elongation factor   | High   | 20 | 5  | 6  | 5  | 324  | 35.3  | 7.06  | 180  | 97.6  | 101.6 | 97.7  | 102.2 | 100.5 | 100.4 |
| Q9D898 | <i>Arpc5l</i>   | Actin-related       | High   | 39 | 5  | 9  | 5  | 153  | 17    | 6.8   | 199  | 95.3  | 99    | 91    | 105.8 | 107.1 | 101.9 |
| Q91XI1 | <i>Dus3l</i>    | tRNA-               | High   | 4  | 2  | 2  | 2  | 637  | 71    | 7.97  | 27   | 96.6  | 102.6 | 113.5 | 95    | 95.6  | 96.7  |
| P01637 |                 | Ig kappa chain      | Medium | 6  | 1  | 1  | 1  | 128  | 14.4  | 8.59  | 23   |       |       |       |       |       |       |
| Q8CAK3 | <i>Shfl</i>     | Shiftless antiviral | High   | 6  | 2  | 2  | 2  | 290  | 33    | 7.28  | 30   | 92.6  | 96    | 98.2  | 102.7 | 99.9  | 110.7 |
| P54797 | <i>Tango2</i>   | Transport and       | High   | 11 | 2  | 2  | 2  | 276  | 30.9  | 5.1   | 62   | 97    | 86.4  | 99.6  | 111.1 | 96.3  | 109.7 |

|        |                 |                   |        |    |    |    |    |      |       |      |     |       |       |       |       |       |       |
|--------|-----------------|-------------------|--------|----|----|----|----|------|-------|------|-----|-------|-------|-------|-------|-------|-------|
| P58044 | <i>Idi1</i>     | Isopentenyl-      | High   | 18 | 3  | 3  | 3  | 227  | 26.3  | 6.16 | 82  | 92    | 101.6 | 94.1  | 110.5 | 92.5  | 109.3 |
| Q3TRR0 | <i>Map9</i>     | Microtubule-      | High   | 15 | 6  | 6  | 6  | 646  | 73.5  | 7.62 | 121 | 97    | 99.7  | 92.5  | 103.6 | 102.1 | 105.1 |
| Q7TMC8 | <i>Fcsk</i>     | L-fucose kinase   | High   | 6  | 5  | 5  | 5  | 1090 | 119.2 | 6.6  | 89  | 98.7  | 99.4  | 95.8  | 102.4 | 102.6 | 101.1 |
| Q8BXQ2 | <i>Pigt</i>     | GPI               | High   | 7  | 3  | 3  | 3  | 582  | 65.7  | 8.4  | 27  |       |       |       |       |       |       |
| O88696 | <i>Clpp</i>     | ATP-dependent     | High   | 28 | 6  | 11 | 6  | 272  | 29.8  | 7.47 | 115 | 101.1 | 96    | 100.1 | 99.8  | 100.5 | 102.4 |
| P20060 | <i>Hexb</i>     | Beta-             | High   | 22 | 12 | 17 | 12 | 536  | 61.1  | 8.12 | 219 | 118.8 | 111.8 | 133.9 | 80.4  | 77.8  | 77.4  |
| Q8CIQ7 | <i>Dock3</i>    | Dedicator of      | High   | 9  | 15 | 17 | 14 | 2027 | 232.8 | 6.99 | 252 | 94.4  | 93.5  | 94.5  | 103.5 | 108.5 | 105.5 |
| Q9JMK2 | <i>Csnk1e</i>   | Casein kinase I   | High   | 27 | 9  | 10 | 5  | 416  | 47.3  | 9.66 | 169 | 98.8  | 95.6  | 99    | 107   | 94    | 105.5 |
| P54729 | <i>Nub1</i>     | NEDD8 ultimate    | High   | 3  | 2  | 2  | 2  | 614  | 70.3  | 5.88 | 31  | 106.3 | 103.3 | 105.7 | 93.3  | 96.4  | 94.9  |
| A2AHL1 | <i>Ano3</i>     | Anoctamin-3       | High   | 3  | 2  | 2  | 2  | 981  | 114.5 | 8.87 | 35  |       |       |       |       |       |       |
| P28474 | <i>Adh5</i>     | Alcohol           | High   | 30 | 11 | 18 | 11 | 374  | 39.5  | 7.25 | 188 | 101.1 | 102.3 | 101.7 | 96.7  | 98.7  | 99.5  |
| Q80YQ8 | <i>Rmnd5a</i>   | E3 ubiquitin-     | High   | 6  | 2  | 2  | 2  | 391  | 44    | 6.06 | 60  | 97.6  | 101   | 96.4  | 100.3 | 98.1  | 106.7 |
| P59672 | <i>Anks1a</i>   | Ankyrin repeat    | High   | 2  | 2  | 2  | 1  | 1150 | 125.2 | 6.05 | 32  |       |       |       |       |       |       |
| P47743 | <i>Grm8</i>     | Metabotropic      | High   | 4  | 2  | 2  | 2  | 908  | 101.8 | 8.15 | 35  |       |       |       |       |       |       |
| Q91WC3 | <i>Acsl6</i>    | Long-chain-fatty- | High   | 42 | 27 | 46 | 26 | 697  | 78    | 7.34 | 723 | 97.3  | 101.6 | 95.9  | 104.3 | 99.6  | 101.2 |
| Q99N57 | <i>Raf1</i>     | RAF proto-        | High   | 7  | 3  | 3  | 1  | 648  | 72.9  | 9.16 | 63  | 81.3  | 109.3 | 87.3  | 119.4 | 101.2 | 101.5 |
| Q8C7V8 | <i>Ccdc134</i>  | Coiled-coil       | High   | 7  | 1  | 1  | 1  | 229  | 26.5  | 8.53 | 25  | 96.3  | 117.9 | 99    | 100.1 | 92.7  | 94    |
| Q8VE97 | <i>Srsf4</i>    | Serine/arginine-  | High   | 12 | 7  | 8  | 4  | 489  | 55.9  | 11.4 | 86  | 98.9  | 99.7  | 100.2 | 100.2 | 99.6  | 101.4 |
| O70252 | <i>Hmox2</i>    | Heme              | High   | 43 | 11 | 16 | 11 | 315  | 35.7  | 5.87 | 235 | 101.7 | 102.1 | 101.8 | 99.2  | 97.8  | 97.3  |
| P46737 | <i>Brcc3</i>    | Lys-63-specific   | High   | 13 | 3  | 4  | 3  | 291  | 33.3  | 5.83 | 32  | 98.8  | 87.3  | 104.6 | 108.9 | 99.5  | 101   |
| Q8BG39 | <i>Sv2b</i>     | Synaptic vesicle  | High   | 23 | 14 | 36 | 12 | 683  | 77.4  | 5.57 | 545 | 93.8  | 97.6  | 93.7  | 108.7 | 104.6 | 101.6 |
| Q8BMJ3 | <i>Eif1ax</i>   | Eukaryotic        | High   | 26 | 4  | 6  | 1  | 144  | 16.5  | 5.24 | 137 | 103.5 | 95.3  | 112.1 | 101.5 | 90    | 97.7  |
| P54071 | <i>Idh2</i>     | Isocitrate        | High   | 32 | 12 | 21 | 12 | 452  | 50.9  | 8.69 | 477 | 101.2 | 104.6 | 109.7 | 94.8  | 95.5  | 94.2  |
| P80315 | <i>Cct4</i>     | T-complex         | High   | 52 | 24 | 36 | 23 | 539  | 58    | 8.02 | 817 | 102.1 | 100.9 | 103.5 | 97    | 98.3  | 98.1  |
| A2APX8 | <i>Scn1a</i>    | Sodium channel    | High   | 9  | 18 | 22 | 8  | 2009 | 228.7 | 5.87 | 229 | 97.3  | 108.6 | 84.3  | 107.7 | 101.1 | 101   |
| P35438 | <i>Grin1</i>    | Glutamate         | High   | 17 | 15 | 22 | 15 | 938  | 105.4 | 8.84 | 326 | 95.7  | 99.9  | 91.9  | 107   | 103.1 | 102.4 |
| Q9QYY8 | <i>Spast</i>    | Spastin OS=Mus    | High   | 7  | 3  | 3  | 3  | 614  | 66.4  | 9.69 | 56  | 93.9  | 98.7  | 89.8  | 103.3 | 104   | 110.3 |
| Q921L3 | <i>Tmco1</i>    | Calcium load-     | High   | 7  | 1  | 1  | 1  | 188  | 21.2  | 9.74 | 28  |       |       |       |       |       |       |
| Q61016 | <i>Gng7</i>     | Guanine           | High   | 47 | 3  | 7  | 3  | 68   | 7.5   | 8.51 | 205 | 86    | 93.3  | 97.6  | 97.8  | 111.9 | 113.3 |
| P50518 | <i>Atp6v1e1</i> | V-type proton     | High   | 45 | 15 | 55 | 15 | 226  | 26.1  | 8.43 | 741 | 96.5  | 97.8  | 94.2  | 104.3 | 104   | 103.2 |
| P52432 | <i>Polr1c</i>   | DNA-directed      | High   | 7  | 2  | 3  | 2  | 346  | 39.1  | 5.21 | 49  |       |       |       |       |       |       |
| Q8K2C9 | <i>Hacd3</i>    | Very-long-chain   | High   | 27 | 9  | 11 | 9  | 362  | 43.1  | 9.13 | 120 | 100   | 97.4  | 105.8 | 96.2  | 102.1 | 98.5  |
| Q9CQK7 | <i>Rwdd1</i>    | RWD domain-       | High   | 18 | 3  | 5  | 3  | 243  | 27.8  | 4.26 | 106 | 99    | 101.2 | 94.3  | 106   | 98.5  | 101.1 |
| Q9WTU6 | <i>Mapk9</i>    | Mitogen-          | High   | 18 | 7  | 10 | 3  | 423  | 48.2  | 5.97 | 107 | 97.1  | 98.3  | 91.5  | 102.8 | 104   | 106.3 |
| Q9Z1Q5 | <i>Clic1</i>    | Chloride          | High   | 44 | 6  | 9  | 6  | 241  | 27    | 5.17 | 114 | 121.3 | 106.2 | 146.8 | 73.2  | 77    | 75.5  |
| Q9JHW4 | <i>Eefsec</i>   | Selenocysteine-   | High   | 10 | 3  | 4  | 3  | 583  | 63.5  | 8.29 | 131 | 100.6 | 100.9 | 94.5  | 99.6  | 94.7  | 109.8 |
| Q922P9 | <i>Glyr1</i>    | Putative          | High   | 11 | 4  | 5  | 4  | 546  | 59.7  | 9.22 | 61  | 104   | 100.4 | 97.1  | 95.8  | 99    | 103.6 |
| Q62465 | <i>Vat1</i>     | Synaptic vesicle  | High   | 30 | 10 | 16 | 10 | 406  | 43.1  | 6.37 | 378 | 101.3 | 104.7 | 101.2 | 94.6  | 99    | 99.2  |
| Q8VED5 | <i>Krt79</i>    | Keratin, type II  | High   | 5  | 3  | 3  | 1  | 531  | 57.5  | 7.69 | 82  | 63.4  | 155.3 | 66.8  | 175.4 | 57.9  | 81.3  |
| P97765 | <i>Wbp2</i>     | WW domain-        | High   | 15 | 4  | 6  | 4  | 261  | 28    | 6.33 | 102 | 98.5  | 107.5 | 93.3  | 102.1 | 100.6 | 98.1  |
| P28184 | <i>Mt3</i>      | Metallothionein-3 | High   | 47 | 2  | 4  | 2  | 68   | 7     | 7.47 | 91  | 87.3  | 87    | 158.5 | 89.3  | 76.7  | 101.1 |
| Q8R555 | <i>Crtac1</i>   | Cartilage acidic  | High   | 7  | 3  | 4  | 3  | 646  | 70.3  | 5.14 | 94  | 98.3  | 99.4  | 102.2 | 99.6  | 98.2  | 102.2 |
| Q8VHK9 | <i>Dhx36</i>    | ATP-dependent     | High   | 7  | 5  | 5  | 4  | 1001 | 113.8 | 8.29 | 55  | 90.7  | 94    | 84    | 92.5  | 127.1 | 111.6 |
| Q9CWU6 | <i>Uqcc1</i>    | Ubiquinol-        | High   | 11 | 3  | 5  | 3  | 295  | 34.3  | 8.48 | 60  | 98.8  | 106.2 | 97.6  | 99.2  | 99.6  | 98.7  |
| Q60675 | <i>Lama2</i>    | Laminin subunit   | High   | 1  | 2  | 2  | 2  | 3118 | 343.6 | 6.09 | 54  | 97.2  | 103.8 | 97.4  | 100.9 | 104.7 | 95.9  |
| P70232 | <i>Chl1</i>     | Neural cell       | High   | 21 | 16 | 21 | 16 | 1209 | 135   | 5.57 | 309 | 105.1 | 99.7  | 104.8 | 93.9  | 97.8  | 98.7  |
| O88485 | <i>Dync1i1</i>  | Cytoplasmic       | High   | 37 | 14 | 22 | 13 | 628  | 70.7  | 5.12 | 535 | 91.3  | 95.2  | 96.3  | 103   | 106.2 | 108.1 |
| Q9D0B6 | <i>Pbdc1</i>    | Protein PBDC1     | High   | 26 | 4  | 5  | 4  | 198  | 22.2  | 4.55 | 19  | 88    | 120.4 | 109.2 | 86.1  | 89.2  | 107.1 |
| Q99LB6 | <i>Mat2b</i>    | Methionine        | High   | 17 | 5  | 8  | 5  | 334  | 37.4  | 6.95 | 133 | 102.9 | 102.4 | 95.6  | 100.8 | 96.5  | 101.7 |
| Q6PAM1 | <i>Txlna</i>    | Alpha-taxilin     | High   | 6  | 3  | 3  | 3  | 554  | 62.3  | 6.74 | 33  | 105.3 | 91.3  | 96.3  | 100   | 105.8 | 101.2 |
| P41234 | <i>Abca2</i>    | ATP-binding       | High   | 1  | 2  | 3  | 2  | 2434 | 270.3 | 6.76 | 64  | 93.1  | 99    | 96.9  | 103.2 | 105.5 | 102.3 |
| P57759 | <i>Erp29</i>    | Endoplasmic       | High   | 45 | 8  | 12 | 8  | 262  | 28.8  | 6.15 | 278 | 109.4 | 98.9  | 117.2 | 92.1  | 92.5  | 89.8  |
| Q3UPH1 | <i>Prrc1</i>    | Protein PRRC1     | High   | 10 | 3  | 4  | 3  | 443  | 46.3  | 5.95 | 87  | 95.5  | 106.2 | 105.2 | 89.5  | 100   | 103.7 |
| Q9JHI5 | <i>Ivd</i>      | Isovaleryl-CoA    | High   | 31 | 11 | 19 | 11 | 424  | 46.3  | 8.29 | 381 | 92.6  | 92.2  | 101.4 | 103.9 | 105.6 | 104.4 |
| Q9ZOP4 | <i>Palm</i>     | Paralemmin-1      | High   | 45 | 17 | 44 | 16 | 383  | 41.6  | 4.84 | 787 | 94.3  | 95.9  | 86.8  | 109.1 | 104.7 | 109.2 |
| P26450 | <i>Pik3r1</i>   | Phosphatidylinos  | High   | 8  | 6  | 7  | 6  | 724  | 83.5  | 6.28 | 92  | 100.1 | 103.3 | 98.3  | 100.9 | 99.5  | 97.9  |
| Q9JHR7 | <i>Ide</i>      | Insulin-          | High   | 9  | 7  | 9  | 7  | 1019 | 117.7 | 6.54 | 136 | 101.3 | 102   | 97.4  | 96.9  | 100.7 | 101.8 |
| Q9CY64 | <i>Blvra</i>    | Biliverdin        | High   | 28 | 8  | 12 | 8  | 295  | 33.5  | 7.02 | 180 | 104.4 | 102.9 | 98.3  | 98.9  | 97.7  | 97.8  |
| Q9WTS2 | <i>Fut8</i>     | Alpha-(1,6)-      | Medium | 2  | 1  | 1  | 1  | 575  | 66.5  | 7.52 | 16  | 96    | 109.9 | 98.8  | 95.1  | 98.8  | 101.3 |
| Q9CXW2 | <i>Mrps22</i>   | 28S ribosomal     | High   | 14 | 5  | 5  | 5  | 359  | 41.2  | 8.56 | 74  | 101.9 | 94.6  | 108.3 | 95.2  | 98.4  | 101.7 |
| Q9JI90 | <i>Rnf14</i>    | E3 ubiquitin-     | High   | 13 | 7  | 11 | 7  | 485  | 54.9  | 4.7  | 116 | 101.2 | 97.1  | 97.1  | 100.5 | 104.1 | 100   |
| Q4QQM4 | <i>Trp53i11</i> | Tumor protein     | High   | 17 | 3  | 4  | 3  | 189  | 20.9  | 9.41 | 82  | 103.2 | 93.9  | 103.2 | 98.9  | 103   | 97.8  |
| Q99PI5 | <i>Lpin2</i>    | Phosphatidate     | High   | 2  | 2  | 2  | 2  | 893  | 99.6  | 5.47 | 28  |       |       |       |       |       |       |
| P35762 | <i>Cd81</i>     | CD81 antigen      | High   | 24 | 4  | 16 | 4  | 236  | 25.8  | 5.83 | 530 | 93.3  | 105   | 104.5 | 100.8 | 98.4  | 98    |
| P70704 | <i>Atp8a1</i>   | Phospholipid-     | High   | 25 | 27 | 39 | 27 | 1164 | 131.3 | 6.84 | 635 | 104   | 100.9 | 104   | 94.3  | 99    | 97.8  |
| O88507 | <i>Cntfr</i>    | Ciliary           | High   | 5  | 2  | 4  | 2  | 372  | 40.8  | 6.83 | 63  | 93.4  | 96.7  | 91.3  | 104.3 | 107.2 | 107.2 |
| Q3TQB2 | <i>Foxred1</i>  | FAD-dependent     | Medium | 2  | 1  | 1  | 1  | 487  | 54.1  | 7.53 | 19  |       |       |       |       |       |       |
| Q9ES74 | <i>Nek7</i>     | Serine/threonine  | High   | 14 | 3  | 3  | 3  | 302  | 34.5  | 8.25 | 37  | 98.6  | 103.7 | 106.6 | 87.9  | 98.1  | 105.2 |

|        |                 |                  |        |    |    |     |    |      |       |       |       |       |       |       |       |       |       |
|--------|-----------------|------------------|--------|----|----|-----|----|------|-------|-------|-------|-------|-------|-------|-------|-------|-------|
| Q8R0N6 | <i>Adhfe1</i>   | Hydroxyacid-     | High   | 6  | 2  | 2   | 2  | 465  | 49.9  | 7.58  | 73    | 75.5  | 114.7 | 96.7  | 91.9  | 104.4 | 116.8 |
| Q924C1 | <i>Xpo5</i>     | Exportin-5       | High   | 10 | 10 | 12  | 10 | 1204 | 136.9 | 5.82  | 142   | 97.7  | 99.4  | 103.4 | 102.4 | 99.7  | 97.4  |
| Q80TT8 | <i>Cul9</i>     | Cullin-9 OS=Mus  | High   | 1  | 1  | 1   | 1  | 1865 | 209   | 5.63  | 23    |       |       |       |       |       |       |
| P63024 | <i>Vamp3</i>    | Vesicle-         | High   | 39 | 4  | 18  | 1  | 103  | 11.5  | 8.5   | 487   | 95.5  | 102.7 | 103.1 | 102.2 | 100.6 | 95.8  |
| P97326 | <i>Cdh6</i>     | Cadherin-6       | High   | 6  | 3  | 4   | 1  | 790  | 88.3  | 5     | 78    | 107.4 | 87.2  | 104.4 | 98.4  | 105.1 | 97.4  |
| Q9Z2A0 | <i>Pdpk1</i>    | 3-               | High   | 11 | 6  | 9   | 6  | 559  | 63.7  | 7.37  | 105   | 93    | 105.3 | 92.5  | 102.8 | 105.8 | 100.7 |
| P51881 | <i>Slc25a5</i>  | ADP/ATP          | High   | 53 | 19 | 79  | 9  | 298  | 32.9  | 9.73  | 1286  | 98.6  | 106.8 | 91.5  | 103.4 | 100.4 | 99.4  |
| Q9QZN1 | <i>Fbxl17</i>   | F-box/LRR-       | Medium | 4  | 2  | 2   | 2  | 701  | 75.6  | 8.1   | 0     | 82.6  | 100.7 | 83.3  | 110.9 | 119.6 | 102.9 |
| P62900 | <i>Rpl31</i>    | 60S ribosomal    | High   | 20 | 3  | 5   | 3  | 125  | 14.5  | 10.54 | 91    | 110.2 | 96    | 104.8 | 98.8  | 96.1  | 94    |
| P50247 | <i>Ahcy</i>     | Adenosylhomocy   | High   | 46 | 18 | 25  | 16 | 432  | 47.7  | 6.54  | 550   | 100.7 | 102.1 | 101.9 | 99.1  | 98.2  | 98    |
| P83917 | <i>Cbx1</i>     | Chromobox        | High   | 24 | 3  | 7   | 2  | 185  | 21.4  | 4.93  | 177   | 98.6  | 94.7  | 106.9 | 97.9  | 100.1 | 101.9 |
| Q60953 | <i>Pml</i>      | Protein PML      | High   | 2  | 1  | 1   | 1  | 885  | 98.2  | 5.63  | 86    | 94.5  | 111.5 | 114   | 86.8  | 83.5  | 109.8 |
| Q8CBE3 | <i>Wdr37</i>    | WD repeat-       | High   | 28 | 15 | 23  | 15 | 496  | 55    | 7.23  | 293   | 97.7  | 99.1  | 94.6  | 101.2 | 104.6 | 102.7 |
| P30416 | <i>Fkbp4</i>    | Peptidyl-prolyl  | High   | 27 | 12 | 20  | 12 | 458  | 51.5  | 5.72  | 197   | 101.4 | 106   | 103.3 | 97.7  | 94.7  | 96.9  |
| Q8VHI6 | <i>Wasf3</i>    | Wiskott-Aldrich  | High   | 22 | 8  | 13  | 6  | 501  | 55.2  | 6.37  | 312   | 94    | 96    | 93.6  | 105   | 104.9 | 106.5 |
| A2A8Z1 | <i>Osbpl9</i>   | Oxysterol-       | High   | 4  | 3  | 3   | 3  | 736  | 83.1  | 6.07  | 76    | 101.5 | 99    | 106.5 | 94.8  | 101   | 97.2  |
| O08740 | <i>Polr2j</i>   | DNA-directed     | High   | 15 | 1  | 1   | 1  | 117  | 13.2  | 5.86  | 49    | 114.7 | 85.9  | 100.8 | 108.3 | 97.8  | 92.5  |
| Q8BZM1 | <i>Glmn</i>     | Glomulin         | High   | 5  | 3  | 4   | 3  | 596  | 67.7  | 5.06  | 82    | 94.7  | 102.1 | 84.9  | 108.2 | 102.2 | 107.9 |
| Q62426 | <i>Cstb</i>     | Cystatin-B       | High   | 57 | 3  | 9   | 3  | 98   | 11    | 7.39  | 73    | 102.6 | 103.9 | 107.6 | 93.3  | 95.4  | 97.2  |
| E9Q557 | <i>Dsp</i>      | Desmoplakin      | High   | 0  | 1  | 1   | 1  | 2883 | 332.7 | 6.8   | 40    | 73.2  | 106.5 | 80.9  | 105.1 | 105.6 | 128.6 |
| Q9Z1G4 | <i>Atp6v0a1</i> | V-type proton    | High   | 36 | 27 | 69  | 25 | 839  | 96.4  | 6.76  | 1173  | 94.8  | 100.2 | 92.6  | 105.3 | 102.6 | 104.4 |
| O55100 | <i>Syng1</i>    | Synaptogyrin-1   | High   | 15 | 3  | 9   | 3  | 234  | 25.6  | 4.65  | 206   | 95.9  | 99.9  | 92.9  | 105.3 | 106   | 100.1 |
| O55142 | <i>Rpl35a</i>   | 60S ribosomal    | High   | 40 | 5  | 15  | 5  | 110  | 12.5  | 10.89 | 175   | 104.6 | 101.6 | 105.6 | 99.4  | 96.3  | 92.5  |
| O35075 | <i>Vps26c</i>   | Vacuolar protein | High   | 8  | 2  | 3   | 2  | 297  | 32.9  | 7.68  | 60    | 97.9  | 105.4 | 94.6  | 99.3  | 107   | 95.7  |
| Q60715 | <i>P4ha1</i>    | Prolyl 4-        | High   | 4  | 2  | 2   | 2  | 534  | 60.9  | 5.9   | 27    | 101.7 | 111.3 | 106.5 | 88.6  | 90.2  | 101.8 |
| Q63932 | <i>Map2k2</i>   | Dual specificity | High   | 22 | 8  | 20  | 3  | 401  | 44.4  | 7.05  | 320   | 96.2  | 101.2 | 99    | 100   | 103.1 | 100.5 |
| Q8BWU5 | <i>Osgep</i>    | Probable tRNA    | High   | 13 | 3  | 3   | 3  | 335  | 36.3  | 6.24  | 35    | 106.9 | 102.1 | 100.8 | 101.1 | 93.5  | 95.6  |
| P28665 | <i>Mug1</i>     | Murinoglobulin-1 | High   | 22 | 23 | 41  | 23 | 1476 | 165.2 | 6.42  | 731   | 149.7 | 65.2  | 215.8 | 55.7  | 56.1  | 57.5  |
| P09055 | <i>Itgb1</i>    | Integrin beta-1  | High   | 17 | 12 | 20  | 12 | 798  | 88.2  | 5.94  | 193   | 104.1 | 102.9 | 112.9 | 92.2  | 91.3  | 96.5  |
| Q810B6 | <i>Anky1</i>    | Rabankyrin-5     | High   | 14 | 12 | 14  | 12 | 1169 | 128.6 | 5.91  | 118   | 99.3  | 98.6  | 103   | 92.8  | 95.2  | 111.1 |
| Q8BYK6 | <i>Ythdf3</i>   | YTH domain-      | High   | 9  | 5  | 5   | 4  | 585  | 63.9  | 9.04  | 105   | 98.6  | 99.7  | 97.1  | 103.1 | 100.6 | 100.9 |
| P07361 | <i>Orm2</i>     | Alpha-1-acid     | High   | 16 | 3  | 4   | 1  | 207  | 23.8  | 5.45  | 58    |       |       |       |       |       |       |
| Q61809 | <i>Lrrn1</i>    | Leucine-rich     | Low    | 1  | 1  | 1   | 1  | 716  | 80.5  | 6.15  | 0     |       |       |       |       |       |       |
| Q6DFV7 | <i>Ncoa7</i>    | Nuclear receptor | High   | 3  | 2  | 2   | 2  | 943  | 106.3 | 5.43  | 35    | 95.2  | 94.9  | 88.7  | 104.1 | 104.1 | 113   |
| Q99N93 | <i>Mrp16</i>    | 39S ribosomal    | High   | 10 | 2  | 2   | 2  | 251  | 28.8  | 10.27 | 36    | 88.7  | 106.7 | 88.8  | 97    | 109   | 109.8 |
| B9EJ80 | <i>Pdzd8</i>    | PDZ domain-      | High   | 2  | 2  | 3   | 2  | 1147 | 127.7 | 6.04  | 60    | 97.1  | 103.3 | 96.9  | 97.8  | 104.2 | 100.7 |
| Q8CAL5 | <i>Gpc5</i>     | Glypican-5       | High   | 2  | 1  | 2   | 1  | 572  | 63.8  | 7.3   | 71    | 93.7  | 92.8  | 77.8  | 110.7 | 101.6 | 123.3 |
| P16332 | <i>Mmut</i>     | Methylmalonyl-   | High   | 18 | 11 | 14  | 11 | 748  | 82.8  | 6.89  | 215   | 94.1  | 100.6 | 97.6  | 98.1  | 103   | 106.6 |
| Q9CR51 | <i>Atp6v1g1</i> | V-type proton    | High   | 36 | 3  | 4   | 3  | 118  | 13.7  | 7.97  | 84    | 94.3  | 94.5  | 96.6  | 102   | 112.6 | 100   |
| Q9WV31 | <i>Arc</i>      | Activity-        | High   | 4  | 2  | 2   | 2  | 396  | 45.3  | 5.39  | 22    |       |       |       |       |       |       |
| Q9CWT3 | <i>Snx10</i>    | Sorting nexin-10 | High   | 8  | 1  | 1   | 1  | 201  | 23.5  | 5.78  | 15    |       |       |       |       |       |       |
| Q9QUG9 | <i>Rasgrp2</i>  | RAS guanyl-      | High   | 7  | 3  | 3   | 3  | 608  | 69.4  | 7.66  | 28    | 89.7  | 88.3  | 92.3  | 106.9 | 112.2 | 110.7 |
| Q8BIW1 | <i>Prune1</i>   | Exopolyphospha   | High   | 28 | 9  | 13  | 9  | 454  | 50.2  | 5.11  | 250   | 93.5  | 98.9  | 91    | 100.2 | 104.6 | 111.7 |
| A6H611 | <i>Mipep</i>    | Mitochondrial    | High   | 5  | 3  | 4   | 3  | 711  | 80.8  | 7.15  | 72    | 90.2  | 103.2 | 104.4 | 114.3 | 79.1  | 108.8 |
| Q8BRU6 | <i>Slc18a2</i>  | Synaptic         | High   | 2  | 1  | 1   | 1  | 517  | 55.7  | 6.23  | 20    | 71.4  | 96.9  | 74.7  | 108.1 | 124.6 | 124.2 |
| Q9JIH2 | <i>Nup50</i>    | Nuclear pore     | High   | 2  | 1  | 1   | 1  | 466  | 49.5  | 6.24  | 30    | 107.3 | 109.8 | 102.1 | 93.2  | 98.6  | 89    |
| Q923T9 | <i>Camk2g</i>   | Calcium/calmod   | High   | 38 | 15 | 74  | 9  | 529  | 59.6  | 7.58  | 1442  | 97.7  | 100.5 | 85.7  | 110.3 | 102.8 | 102.9 |
| P59644 | <i>Inpp5j</i>   | Phosphatidylinos | High   | 4  | 4  | 4   | 4  | 1003 | 107.5 | 9.36  | 39    | 93.5  | 103.3 | 88.6  | 108.5 | 99.2  | 106.8 |
| P03975 | <i>Iap</i>      | IgE-binding      | High   | 3  | 1  | 1   | 1  | 557  | 62.7  | 9.31  | 17    | 104.9 | 90.8  | 91.7  | 109.9 | 97.8  | 105   |
| Q9D7S9 | <i>Chmp5</i>    | Charged          | High   | 30 | 6  | 11  | 6  | 219  | 24.6  | 4.79  | 227   | 102   | 102.3 | 101.2 | 97    | 99.8  | 97.7  |
| Q3URF8 | <i>Kctd21</i>   | BTB/POZ          | High   | 4  | 1  | 1   | 1  | 260  | 29.6  | 6.79  | 42    | 121.1 | 88.5  | 128   | 73.8  | 97.4  | 91.2  |
| Q04690 | <i>Nf1</i>      | Neurofibromin    | High   | 12 | 28 | 42  | 28 | 2841 | 319.4 | 7.39  | 588   | 97.4  | 101   | 94    | 107.6 | 103   | 97    |
| Q91VW3 | <i>Sh3bgr13</i> | SH3 domain-      | High   | 47 | 5  | 7   | 5  | 93   | 10.5  | 5.14  | 145   | 97.7  | 103.6 | 107.5 | 96    | 97.4  | 97.8  |
| O08532 | <i>Cacna2d1</i> | Voltage-         | High   | 29 | 28 | 43  | 27 | 1103 | 124.6 | 5.3   | 721   | 91.9  | 99.8  | 86.1  | 108.3 | 108.5 | 105.4 |
| Q8VBY2 | <i>Camkk1</i>   | Calcium/calmod   | High   | 22 | 9  | 10  | 9  | 505  | 55.8  | 5.99  | 144   | 90.8  | 108.4 | 84.8  | 108   | 103.3 | 104.8 |
| Q9CQ75 | <i>Ndufa2</i>   | NADH             | High   | 49 | 6  | 12  | 6  | 99   | 10.9  | 9.99  | 240   | 95.3  | 103   | 90.7  | 106.9 | 102   | 102.2 |
| Q91W90 | <i>Txndc5</i>   | Thioredoxin      | High   | 18 | 6  | 7   | 6  | 417  | 46.4  | 5.78  | 156   | 95.7  | 99.1  | 121.8 | 98.6  | 97.4  | 87.5  |
| Q9WTK7 | <i>Stk11</i>    | Serine/threonine | High   | 13 | 3  | 3   | 3  | 436  | 49.2  | 6.84  | 53    | 92.6  | 100.8 | 94    | 110.2 | 97    | 105.4 |
| Q9D823 | <i>Rpl37</i>    | 60S ribosomal    | Medium | 7  | 1  | 1   | 1  | 97   | 11.1  | 11.74 | 30    | 100.4 | 103.8 | 102.4 | 104.1 | 91.1  | 98.3  |
| Q9CXZ1 | <i>Ndufs4</i>   | NADH             | High   | 32 | 5  | 12  | 5  | 175  | 19.8  | 9.99  | 266   | 94.7  | 101.7 | 86    | 105.8 | 113.1 | 98.7  |
| Q8CG72 | <i>Adprs</i>    | ADP-ribose       | High   | 19 | 5  | 6   | 5  | 370  | 39.4  | 4.96  | 104   | 92.1  | 95.8  | 104.6 | 105.5 | 101.4 | 100.7 |
| Q9QYK5 | <i>Hs6st1</i>   | Heparan-sulfate  | Low    | 3  | 1  | 1   | 1  | 411  | 48.3  | 8.7   | 19    |       |       |       |       |       |       |
| Q61703 | <i>Itih2</i>    | Inter-alpha-     | High   | 5  | 4  | 4   | 4  | 946  | 105.9 | 7.27  | 52    | 159.9 | 95    | 163.4 | 57.1  | 63.8  | 60.8  |
| Q9CYN9 | <i>Atp6ap2</i>  | Renin receptor   | High   | 12 | 3  | 5   | 3  | 350  | 39.1  | 5.54  | 149   | 95.9  | 97.5  | 88.1  | 111.2 | 105.8 | 101.4 |
| Q9JJA4 | <i>Wdr12</i>    | Ribosome         | High   | 8  | 2  | 2   | 2  | 423  | 47.3  | 5.6   | 17    | 64.7  | 63.9  | 63.1  | 127.1 | 154.8 | 126.4 |
| Q8BH24 | <i>Tm9sf4</i>   | Transmembrane    | High   | 10 | 5  | 5   | 5  | 643  | 74.6  | 7.23  | 61    | 104.9 | 100.5 | 108.6 | 102.5 | 92.2  | 91.3  |
| P68369 | <i>Tuba1a</i>   | Tubulin alpha-1A | High   | 58 | 23 | 574 | 4  | 451  | 50.1  | 5.06  | 12403 | 96.1  | 95.9  | 89.5  | 105.8 | 106.4 | 106.2 |
| Q8K4G5 | <i>Ablim1</i>   | Actin-binding    | High   | 22 | 16 | 22  | 15 | 861  | 96.7  | 8.63  | 272   | 98.3  | 101.1 | 97.3  | 103.3 | 99    | 101   |

|        |                   |                   |        |    |    |     |    |      |       |       |      |       |       |       |       |       |       |
|--------|-------------------|-------------------|--------|----|----|-----|----|------|-------|-------|------|-------|-------|-------|-------|-------|-------|
| Q9WUD1 | <i>Stub1</i>      | STIP1 homology    | High   | 27 | 7  | 9   | 7  | 304  | 34.9  | 6.01  | 70   | 93.9  | 98.2  | 96.8  | 104.9 | 101.6 | 104.7 |
| Q9CR59 | <i>Gadd45gip1</i> | Growth arrest     | High   | 8  | 2  | 3   | 2  | 222  | 25.8  | 10.27 | 94   | 95.4  | 96.8  | 98.6  | 102.8 | 101.3 | 105.2 |
| Q7TN79 | <i>Akap7</i>      | A-kinase anchor   | High   | 6  | 2  | 3   | 2  | 314  | 35.5  | 7.87  | 69   | 96.2  | 94.1  | 79.2  | 109.1 | 114.5 | 107   |
| Q571E4 | <i>Galns</i>      | N-                | High   | 2  | 1  | 1   | 1  | 520  | 57.6  | 6.52  | 28   | 97.1  | 97.2  | 124.1 | 94.8  | 91.7  | 95.1  |
| Q6ZWX6 | <i>Eif2s1</i>     | Eukaryotic        | High   | 45 | 12 | 18  | 12 | 315  | 36.1  | 5.08  | 345  | 98.5  | 100.7 | 100.8 | 100.9 | 96.6  | 102.6 |
| P62631 | <i>Eef1a2</i>     | Elongation factor | High   | 48 | 17 | 62  | 9  | 463  | 50.4  | 9.03  | 1080 | 96.9  | 97.7  | 90.9  | 103.5 | 104.5 | 106.5 |
| Q9R0Y5 | <i>Ak1</i>        | Adenylate kinase  | High   | 72 | 14 | 32  | 14 | 194  | 21.5  | 5.81  | 584  | 96.4  | 97.8  | 89.2  | 103.5 | 105.6 | 107.4 |
| Q80TE7 | <i>Lrrc7</i>      | Leucine-rich      | High   | 20 | 25 | 29  | 25 | 1490 | 166.8 | 6.61  | 378  | 95    | 96.1  | 91.2  | 106.6 | 104.7 | 106.4 |
| Q6KAR6 | <i>Exoc3</i>      | Exocyst complex   | High   | 18 | 10 | 12  | 10 | 755  | 86.4  | 6.2   | 216  | 90.6  | 95.1  | 106.7 | 105.6 | 104.8 | 97.2  |
| Q8VBV7 | <i>Cops8</i>      | COP9              | High   | 30 | 4  | 6   | 4  | 209  | 23.2  | 5.2   | 124  | 94.7  | 105.5 | 96.6  | 100.2 | 103   | 100   |
| Q9DAW9 | <i>Cnn3</i>       | Calponin-3        | High   | 39 | 9  | 11  | 9  | 330  | 36.4  | 5.72  | 196  | 123.3 | 108.2 | 163.1 | 65.6  | 67.4  | 72.5  |
| Q80YQ2 | <i>Med23</i>      | Mediator of RNA   | High   | 2  | 2  | 2   | 2  | 1367 | 156   | 7.31  | 20   | 96.1  | 107.5 | 85.9  | 111.5 | 94.1  | 104.8 |
| Q9DC51 | <i>Gnai3</i>      | Guanine           | High   | 31 | 8  | 22  | 5  | 354  | 40.5  | 5.69  | 421  | 98.6  | 101.6 | 99.5  | 98.9  | 100.7 | 100.6 |
| Q63943 | <i>Mef2d</i>      | Myocyte-specific  | Medium | 2  | 1  | 1   | 1  | 514  | 55    | 7.88  | 26   | 97.5  | 100.5 | 97.3  | 100.8 | 101.1 | 102.8 |
| Q9CPV4 | <i>Glod4</i>      | Glyoxalase        | High   | 57 | 15 | 21  | 15 | 298  | 33.3  | 5.47  | 396  | 99.9  | 104.2 | 99.4  | 99.4  | 98    | 99.1  |
| O55229 | <i>Chkb</i>       | Choline/ethanola  | High   | 13 | 5  | 5   | 5  | 394  | 45.1  | 5.41  | 61   | 96.4  | 102.4 | 91.5  | 105.6 | 103.5 | 100.6 |
| Q9DAM7 | <i>Tmem263</i>    | Transmembrane     | High   | 22 | 2  | 2   | 2  | 115  | 11.5  | 9.32  | 51   | 86.7  | 87.6  | 95.5  | 113.4 | 110.4 | 106.4 |
| Q61334 | <i>Bcap29</i>     | B-cell receptor-  | High   | 7  | 2  | 2   | 2  | 240  | 27.9  | 9.72  | 47   | 100.2 | 101.1 | 111.1 | 96.4  | 100.6 | 90.7  |
| P63328 | <i>Ppp3ca</i>     | Serine/threonine  | High   | 49 | 21 | 84  | 14 | 521  | 58.6  | 5.86  | 1523 | 94.2  | 103.6 | 89.5  | 105.4 | 103   | 104.3 |
| P07903 | <i>Erc1</i>       | DNA excision      | Medium | 4  | 1  | 1   | 1  | 298  | 32.9  | 7.36  | 26   | 94.4  | 104.3 | 118.8 | 93.8  | 96.3  | 92.4  |
| Q9CPW4 | <i>Arpc5</i>      | Actin-related     | High   | 48 | 7  | 12  | 7  | 151  | 16.3  | 5.67  | 208  | 96.3  | 100.5 | 104.1 | 97.6  | 100.3 | 101.1 |
| Q62418 | <i>Dbnl</i>       | Drebrin-like      | High   | 38 | 12 | 23  | 12 | 436  | 48.7  | 4.92  | 559  | 96.1  | 94.5  | 99.6  | 111   | 100.5 | 98.3  |
| O08547 | <i>Sec22b</i>     | Vesicle-          | High   | 48 | 10 | 17  | 10 | 215  | 24.7  | 8.51  | 320  | 98.4  | 103.7 | 95.3  | 99.2  | 98.2  | 105.3 |
| P04945 |                   | Ig kappa chain    | Medium | 15 | 1  | 1   | 1  | 108  | 11.7  | 8.84  | 26   | 111.8 | 93.3  | 158.5 | 70.1  | 88.1  | 78.2  |
| Q9CPW2 | <i>Fdx2</i>       | Ferredoxin-2,     | High   | 12 | 2  | 2   | 2  | 174  | 18.8  | 6.04  | 60   | 102   | 97.7  | 97    | 104.2 | 99.4  | 99.7  |
| Q99PU5 | <i>Acsbg1</i>     | Long-chain-fatty- | High   | 46 | 26 | 49  | 26 | 721  | 80.4  | 5.94  | 934  | 104.9 | 101.5 | 105.5 | 96    | 95.1  | 97    |
| Q6PGB6 | <i>Naa50</i>      | N-alpha-          | High   | 33 | 5  | 6   | 5  | 169  | 19.4  | 8.81  | 109  | 104.4 | 98.5  | 101.6 | 97.6  | 99    | 99    |
| P11499 | <i>Hsp90ab1</i>   | Heat shock        | High   | 54 | 39 | 150 | 24 | 724  | 83.2  | 5.03  | 2743 | 101.1 | 101.3 | 110   | 94.8  | 96.6  | 96.1  |
| A6H5Z3 | <i>Exoc6b</i>     | Exocyst complex   | High   | 11 | 8  | 12  | 8  | 810  | 94.1  | 6.39  | 194  | 101.6 | 102.7 | 94    | 99.5  | 101.8 | 100.4 |
| P21460 | <i>Cst3</i>       | Cystatin-C        | High   | 51 | 6  | 11  | 6  | 140  | 15.5  | 9     | 214  | 113.2 | 98.7  | 127.6 | 89.6  | 84.6  | 86.3  |
| P28738 | <i>Kif5c</i>      | Kinesin heavy     | High   | 44 | 37 | 52  | 23 | 956  | 109.2 | 6.19  | 832  | 94.6  | 100.5 | 88.4  | 108.1 | 106   | 102.4 |
| Q8C3X2 | <i>Ccdc90b</i>    | Coiled-coil       | High   | 8  | 2  | 2   | 2  | 256  | 29.6  | 8.53  | 27   | 99.1  | 108.8 | 99.9  | 91.9  | 98.2  | 102.1 |
| Q62095 | <i>Ddx3y</i>      | ATP-dependent     | High   | 35 | 21 | 32  | 1  | 658  | 73.4  | 7.53  | 623  | 92.2  | 90.3  | 98.2  | 96.5  | 108.5 | 114.4 |
| O35874 | <i>Slc1a4</i>     | Neutral amino     | High   | 23 | 9  | 13  | 8  | 532  | 56    | 5.87  | 242  | 105   | 102.2 | 103   | 97    | 96.8  | 96    |
| P35803 | <i>Gpm6b</i>      | Neuronal          | High   | 21 | 6  | 9   | 6  | 328  | 36.2  | 6.14  | 113  | 86.3  | 95.1  | 82.3  | 114.6 | 112.2 | 109.6 |
| Q6WQJ1 | <i>Dagla</i>      | Diacylglycerol    | High   | 13 | 10 | 14  | 10 | 1044 | 115.3 | 6.42  | 211  | 87.7  | 101.1 | 88.7  | 104.7 | 105.3 | 112.4 |
| Q8VEG4 | <i>Exd2</i>       | Exonuclease 3'-   | High   | 6  | 3  | 4   | 3  | 650  | 74.3  | 7.78  | 94   | 96    | 95.7  | 87.4  | 102.8 | 113.9 | 104.1 |
| Q8BGH2 | <i>Samm50</i>     | Sorting and       | High   | 44 | 17 | 25  | 17 | 469  | 51.8  | 6.8   | 396  | 95.8  | 104   | 97.5  | 101.9 | 98.6  | 102.2 |
| Q6Q899 | <i>Ddx58</i>      | Antiviral innate  | High   | 4  | 3  | 3   | 3  | 926  | 105.9 | 6.65  | 61   | 104.2 | 106.9 | 105.6 | 103.3 | 95.1  | 85    |
| P55937 | <i>Golga3</i>     | Golgin subfamily  | High   | 9  | 9  | 9   | 9  | 1487 | 167.1 | 5.4   | 139  | 99.4  | 99.3  | 98.2  | 98.6  | 101.9 | 102.6 |
| P52825 | <i>Cpt2</i>       | Carnitine O-      | High   | 8  | 4  | 4   | 4  | 658  | 73.9  | 8.37  | 42   | 101.5 | 97.6  | 95.2  | 101.3 | 99.9  | 104.6 |
| Q8VEE1 | <i>Lmcd1</i>      | LIM and           | High   | 7  | 2  | 2   | 2  | 365  | 41    | 7.93  | 62   | 106.4 | 96.9  | 89.7  | 103.6 | 101.4 | 101.9 |
| Q8BMS4 | <i>Coq3</i>       | Ubiquinone        | High   | 12 | 3  | 3   | 3  | 370  | 40.9  | 7.96  | 63   | 105.7 | 105.9 | 97.9  | 92.9  | 94.6  | 103   |
| Q9D2G2 | <i>Dlst</i>       | Dihydrolipoyllysi | High   | 33 | 12 | 25  | 12 | 454  | 49    | 8.95  | 580  | 97.7  | 108.2 | 87    | 104.1 | 102   | 100.9 |
| O70435 | <i>Psm3</i>       | Proteasome        | High   | 38 | 11 | 17  | 11 | 255  | 28.4  | 5.44  | 290  | 101.6 | 96.7  | 106.2 | 95.2  | 100.2 | 100.1 |
| Q00558 | <i>F8a1</i>       | 40-kDa            | High   | 16 | 4  | 4   | 4  | 380  | 40.5  | 6.89  | 54   | 98.1  | 100.7 | 95.2  | 104.2 | 100.5 | 101.2 |
| Q8BGA9 | <i>Oxa1l</i>      | Mitochondrial     | High   | 2  | 1  | 1   | 1  | 433  | 48.2  | 9.61  | 31   | 99    | 103.1 | 99    | 98.4  | 99.6  | 100.8 |
| Q01338 | <i>Adra2a</i>     | Alpha-2A          | High   | 4  | 1  | 1   | 1  | 465  | 50.5  | 9.63  | 25   | 97.7  | 94.8  | 93.6  | 100.6 | 100.5 | 112.7 |
| Q8VCZ6 | <i>Sgsm3</i>      | Small G protein   | Low    | 1  | 1  | 1   | 1  | 750  | 85.4  | 5.87  | 0    | 88.9  | 93.6  | 99    | 110.9 | 105.9 | 101.8 |
| A2AJA9 | <i>Ajm1</i>       | Apical junction   | High   | 19 | 15 | 15  | 15 | 974  | 107.1 | 9.11  | 95   | 93.4  | 97.6  | 94.5  | 102.2 | 99.1  | 113.2 |
| Q9R0H0 | <i>Acox1</i>      | Peroxisomal       | High   | 17 | 8  | 8   | 8  | 661  | 74.6  | 8.48  | 112  | 106.3 | 105.3 | 112.7 | 93.3  | 89.9  | 92.5  |
| P57780 | <i>Actn4</i>      | Alpha-actinin-4   | High   | 51 | 42 | 97  | 28 | 912  | 104.9 | 5.41  | 1945 | 96.9  | 102.9 | 93.6  | 103.7 | 102.2 | 100.6 |
| Q60603 | <i>Kcnh1</i>      | Potassium         | Medium | 1  | 1  | 1   | 1  | 989  | 111.2 | 7.47  | 21   |       |       |       |       |       |       |
| P29533 | <i>Vcam1</i>      | Vascular cell     | High   | 16 | 10 | 13  | 10 | 739  | 81.3  | 5.3   | 301  | 105.2 | 108.4 | 110.4 | 92.4  | 92.9  | 90.8  |
| Q9D711 | <i>Pir</i>        | Pirin OS=Mus      | High   | 7  | 2  | 3   | 2  | 290  | 32    | 7.11  | 27   | 103.6 | 90.6  | 96    | 105.6 | 105.8 | 98.3  |
| Q64213 | <i>Sf1</i>        | Splicing factor 1 | High   | 11 | 5  | 7   | 5  | 653  | 70.4  | 8.98  | 69   | 104.6 | 94.8  | 101.2 | 95.9  | 95    | 108.5 |
| Q64511 | <i>Top2b</i>      | DNA               | High   | 13 | 16 | 20  | 16 | 1612 | 181.8 | 8.29  | 265  | 102.2 | 97.3  | 101.1 | 100   | 99.1  | 100.2 |
| Q8BXT1 | <i>Rgs8</i>       | Regulator of G-   | High   | 7  | 1  | 1   | 1  | 180  | 21    | 9.26  | 0    | 90.8  | 95.5  | 85.1  | 107.8 | 104.9 | 115.9 |
| P70207 | <i>Plxna2</i>     | Plexin-A2         | High   | 9  | 15 | 19  | 8  | 1894 | 211.4 | 6.54  | 297  | 91.5  | 98.8  | 96.4  | 104.9 | 100.2 | 108.2 |
| Q61282 | <i>Acan</i>       | Aggrecan core     | High   | 4  | 7  | 7   | 6  | 2132 | 221.8 | 4.3   | 28   | 104.4 | 114.4 | 99.2  | 95.2  | 93    | 93.8  |
| Q8K377 | <i>Lrrtm1</i>     | Leucine-rich      | High   | 10 | 5  | 6   | 5  | 522  | 58.7  | 7.11  | 66   | 96.3  | 97.6  | 88.4  | 107   | 103   | 107.6 |
| Q3TC33 | <i>Ccdc127</i>    | Coiled-coil       | High   | 20 | 4  | 6   | 4  | 260  | 30.5  | 9.13  | 128  | 99    | 106.8 | 94.8  | 99.5  | 98.3  | 101.6 |
| Q80V91 | <i>Dtx3</i>       | Probable E3       | Low    | 7  | 1  | 1   | 1  | 347  | 38    | 8.73  | 15   | 109.5 | 101.2 | 90.7  | 96    | 104.2 | 98.4  |
| Q8CFV4 | <i>Nrn1</i>       | Neuritin          | High   | 34 | 3  | 4   | 3  | 142  | 15.3  | 6.99  | 74   | 94.2  | 101.1 | 97.5  | 110.6 | 99.4  | 97.3  |
| Q02248 | <i>Ctnnb1</i>     | Catenin beta-1    | High   | 33 | 23 | 43  | 19 | 781  | 85.4  | 5.86  | 629  | 98.2  | 97.5  | 93.5  | 103.9 | 101.7 | 105.2 |
| Q3TWW8 | <i>Srsf6</i>      | Serine/arginine-  | High   | 12 | 5  | 6   | 2  | 339  | 39    | 11.46 | 63   | 105.7 | 102.5 | 107.8 | 94.5  | 94.6  | 94.9  |
| Q5DTM8 | <i>Rnf20</i>      | E3 ubiquitin-     | High   | 4  | 3  | 4   | 2  | 973  | 113.5 | 5.96  | 61   | 95.1  | 102.3 | 90.8  | 105.1 | 101.4 | 105.3 |
| P21661 | <i>Pcsk2</i>      | Neuroendocrine    | High   | 10 | 5  | 6   | 5  | 637  | 70.7  | 6.42  | 76   | 100.1 | 101   | 95    | 101.8 | 97.3  | 104.7 |



|        |                 |                   |        |    |    |    |    |      |       |       |      |       |       |       |       |       |       |
|--------|-----------------|-------------------|--------|----|----|----|----|------|-------|-------|------|-------|-------|-------|-------|-------|-------|
| Q99L13 | <i>Hibadh</i>   | 3-                | High   | 29 | 7  | 13 | 7  | 335  | 35.4  | 8.13  | 282  | 104.3 | 102.9 | 97.5  | 94.8  | 100   | 100.7 |
| Q9EQI8 | <i>Mrpl46</i>   | 39S ribosomal     | High   | 12 | 3  | 3  | 3  | 283  | 32.1  | 7.4   | 45   | 96.9  | 99.3  | 95.1  | 99.7  | 98.3  | 110.6 |
| Q99P69 | <i>Nuf2</i>     | Kinetochores      | Medium | 2  | 1  | 1  | 1  | 463  | 54.6  | 8.22  | 0    | 89    | 93.7  | 84.1  | 116   | 107.4 | 109.9 |
| Q99MB7 | <i>Rnf141</i>   | RING finger       | High   | 19 | 4  | 4  | 4  | 230  | 25.5  | 5.2   | 65   | 107.1 | 95.5  | 112.8 | 89.6  | 98.4  | 96.5  |
| Q6PB93 | <i>Galnt2</i>   | Polypeptide N-    | High   | 5  | 2  | 2  | 2  | 570  | 64.5  | 8.53  | 18   | 91.3  | 77.5  | 108   | 108.5 | 123.3 | 91.4  |
| P98156 | <i>Vldlr</i>    | Very low-density  | High   | 6  | 5  | 5  | 5  | 873  | 96.3  | 4.78  | 54   | 93.5  | 95    | 97.2  | 107.5 | 100.8 | 106   |
| Q6P9K9 | <i>Nrxn3</i>    | Neurexin-3        | High   | 15 | 18 | 26 | 14 | 1571 | 173.3 | 6.14  | 536  | 96.9  | 101.8 | 89.1  | 105.6 | 104.7 | 101.9 |
| Q9Z130 | <i>Hnmpdl</i>   | Heterogeneous     | High   | 38 | 9  | 19 | 8  | 301  | 33.5  | 7.31  | 443  | 103.2 | 100.3 | 91.4  | 107.7 | 96.9  | 100.6 |
| Q03157 | <i>Aplp1</i>    | Amyloid-like      | High   | 9  | 5  | 5  | 5  | 653  | 72.7  | 5.67  | 84   | 96.8  | 92.1  | 98.7  | 97.6  | 108.3 | 106.5 |
| Q9CPX6 | <i>Atg3</i>     | Ubiquitin-like-   | High   | 15 | 4  | 7  | 4  | 314  | 35.8  | 4.72  | 129  | 102.1 | 103.2 | 105.5 | 97.5  | 96.4  | 95.3  |
| P60766 | <i>Cdc42</i>    | Cell division     | High   | 48 | 8  | 23 | 7  | 191  | 21.2  | 6.55  | 495  | 101.2 | 98.9  | 106.7 | 96    | 97.7  | 99.5  |
| Q5HZI2 | <i>C2cd4c</i>   | C2 calcium-       | High   | 20 | 5  | 6  | 5  | 419  | 44.6  | 9.73  | 115  | 91.8  | 85.9  | 94.1  | 106.6 | 110.5 | 111.2 |
| P56383 | <i>Atp5mc2</i>  | ATP synthase      | High   | 5  | 1  | 5  | 1  | 146  | 15.5  | 10.35 | 49   | 105.9 | 107.1 | 92.6  | 103.1 | 99    | 92.3  |
| Q8BGF6 | <i>Elmod2</i>   | ELMO domain-      | Medium | 3  | 1  | 1  | 1  | 293  | 34.7  | 8.57  | 18   | 99.1  | 100.1 | 106.4 | 100.6 | 89.4  | 104.4 |
| O70305 | <i>Atxn2</i>    | Ataxin-2          | High   | 3  | 4  | 6  | 3  | 1285 | 136.4 | 9.55  | 103  | 97.4  | 95.2  | 97.1  | 108.2 | 102.5 | 99.7  |
| Q8C9B9 | <i>Dido1</i>    | Death-inducer     | High   | 1  | 3  | 3  | 3  | 2256 | 247   | 7.91  | 15   | 99.4  | 98.4  | 98.8  | 106.4 | 94.3  | 102.6 |
| Q6NVF9 | <i>Cpsf6</i>    | Cleavage and      | High   | 13 | 6  | 7  | 6  | 551  | 59.1  | 7.15  | 175  | 98.1  | 96.7  | 99.3  | 100.2 | 103   | 102.7 |
| Q9CZW5 | <i>Tomm70</i>   | Mitochondrial     | High   | 43 | 24 | 42 | 24 | 611  | 67.5  | 7.53  | 461  | 94    | 97.4  | 89.8  | 106.5 | 104.4 | 108   |
| Q3V0I2 | <i>Prr7</i>     | Proline-rich      | Medium | 10 | 1  | 1  | 1  | 269  | 30.3  | 8.6   | 0    |       |       |       |       |       |       |
| P55284 | <i>Cdh5</i>     | Cadherin-5        | Medium | 2  | 1  | 1  | 1  | 784  | 87.8  | 5.3   | 0    |       |       |       |       |       |       |
| Q9D7M1 | <i>Gid8</i>     | Glucose-induced   | High   | 28 | 4  | 4  | 4  | 228  | 26.8  | 4.97  | 65   | 106.7 | 94.5  | 108.6 | 103   | 87.8  | 99.4  |
| Q9Z2I9 | <i>Sucla2</i>   | Succinate--CoA    | High   | 51 | 22 | 51 | 22 | 463  | 50.1  | 7.01  | 1061 | 97.7  | 105.9 | 93.5  | 102.3 | 101.2 | 99.3  |
| Q8BGF9 | <i>Slc25a44</i> | Solute carrier    | High   | 4  | 1  | 1  | 1  | 314  | 35.3  | 9.66  | 50   | 94.4  | 93.9  | 95.1  | 105.1 | 105.2 | 106.3 |
| Q6RKD8 | <i>Flrt1</i>    | Leucine-rich      | Medium | 2  | 1  | 1  | 1  | 646  | 71.4  | 6.55  | 25   | 99    | 109.5 | 82.9  | 102.4 | 98.9  | 107.3 |
| Q921G8 | <i>Tubgcp2</i>  | Gamma-tubulin     | High   | 10 | 7  | 10 | 7  | 905  | 103.2 | 6.77  | 189  | 99.4  | 99.7  | 95.6  | 102.6 | 100.5 | 102.2 |
| Q03958 | <i>Pfdn6</i>    | Prefoldin subunit | High   | 50 | 7  | 11 | 7  | 127  | 14.4  | 8.88  | 177  | 99.2  | 112.9 | 95.9  | 95.8  | 98    | 98.2  |
| Q8COL8 | <i>Cog5</i>     | Conserved         | High   | 2  | 1  | 1  | 1  | 829  | 91.3  | 6.27  | 21   | 96.6  | 98    | 102.5 | 97.3  | 100.1 | 105.5 |
| P61600 | <i>Naa20</i>    | N-alpha-          | Medium | 5  | 1  | 1  | 1  | 178  | 20.4  | 5.03  | 17   |       |       |       |       |       |       |
| P61924 | <i>Copz1</i>    | Coatomer          | High   | 33 | 4  | 11 | 4  | 177  | 20.2  | 4.81  | 238  | 103.7 | 101.3 | 104.6 | 93.9  | 100.5 | 95.8  |
| P26638 | <i>Sars1</i>    | Serine--tRNA      | High   | 40 | 17 | 33 | 17 | 512  | 58.4  | 6.3   | 581  | 98    | 101.6 | 100.6 | 99.8  | 98.3  | 101.7 |
| P56960 | <i>Exosc10</i>  | Exosome           | Low    | 1  | 1  | 1  | 1  | 887  | 100.9 | 8.29  | 0    |       |       |       |       |       |       |
| Q9WTZ1 | <i>Rnf7</i>     | RING-box          | High   | 8  | 1  | 1  | 1  | 113  | 12.7  | 5.44  | 37   | 104.1 | 99.1  | 129.9 | 86.5  | 89.8  | 90.5  |
| Q80WM4 | <i>Hapln4</i>   | Hyaluronan and    | High   | 20 | 6  | 7  | 6  | 400  | 42.8  | 8.85  | 98   | 97.4  | 104.7 | 92.4  | 99.8  | 100.8 | 104.9 |
| Q923Z3 | <i>Mto1</i>     | Protein MTO1      | High   | 4  | 2  | 2  | 2  | 669  | 74.3  | 8.92  | 23   | 105.3 | 87.5  | 117.5 | 90.7  | 91.1  | 107.8 |
| Q91V76 |                 | Ester hydrolase   | High   | 19 | 6  | 7  | 6  | 315  | 35    | 6.29  | 72   | 98.6  | 103.4 | 97.1  | 95.3  | 92.9  | 112.7 |
| Q9D0T1 | <i>Snu13</i>    | NHP2-like         | High   | 21 | 3  | 3  | 3  | 128  | 14.2  | 8.46  | 51   | 105.8 | 104.8 | 103.4 | 91.7  | 96.9  | 97.3  |
| P28659 | <i>Celf1</i>    | CUGBP Elav-like   | High   | 10 | 5  | 6  | 4  | 486  | 52.1  | 8.46  | 89   | 100.8 | 100.5 | 97.5  | 100.4 | 100.1 | 100.8 |
| P97411 | <i>Ica1</i>     | Islet cell        | High   | 14 | 7  | 8  | 6  | 478  | 54.3  | 5.8   | 92   | 131.9 | 92.5  | 82.3  | 99.3  | 98.7  | 95.3  |
| Q14AX6 | <i>Cdk12</i>    | Cyclin-           | High   | 1  | 2  | 3  | 1  | 1484 | 163.6 | 9.47  | 55   | 99.8  | 105.6 | 103.8 | 98.5  | 96.5  | 95.8  |
| Q00612 | <i>G6pdx</i>    | Glucose-6-        | High   | 23 | 12 | 16 | 12 | 515  | 59.2  | 6.49  | 195  | 106.2 | 108.8 | 108.5 | 91.5  | 90    | 94.9  |
| Q91VZ6 | <i>Smap1</i>    | Stromal           | High   | 15 | 5  | 8  | 5  | 440  | 47.6  | 8.51  | 164  | 95.7  | 95.5  | 88.4  | 113.2 | 107.4 | 99.9  |
| Q3U2I3 | <i>Fam160a2</i> | FTS and Hook-     | High   | 7  | 4  | 5  | 4  | 975  | 106.5 | 6.76  | 143  | 94    | 97.1  | 91    | 107.5 | 102.7 | 107.8 |
| Q91ZR1 | <i>Rab4b</i>    | Ras-related       | High   | 47 | 7  | 14 | 5  | 213  | 23.6  | 6.06  | 261  | 99.4  | 106   | 99.4  | 101.6 | 94.3  | 99.4  |
| Q9JME5 | <i>Ap3b2</i>    | AP-3 complex      | High   | 38 | 36 | 53 | 32 | 1082 | 119.1 | 5.63  | 980  | 95.6  | 97.8  | 88.7  | 104.5 | 108.2 | 105.3 |
| Q9DCT5 | <i>Sdf2</i>     | Stromal cell-     | Medium | 8  | 2  | 2  | 2  | 211  | 23.1  | 7.33  | 0    |       |       |       |       |       |       |
| Q9JLB9 | <i>Nectin3</i>  | Nectin-3          | Low    | 1  | 1  | 1  | 1  | 549  | 60.5  | 6.54  | 15   | 88.6  | 95.2  | 77.3  | 117.8 | 110.9 | 110.1 |
| Q3TSG4 | <i>Alkbh5</i>   | RNA               | Low    | 3  | 1  | 1  | 1  | 395  | 44.4  | 9.09  | 0    |       |       |       |       |       |       |
| Q8C966 | <i>Phf21b</i>   | PHD finger        | Low    | 2  | 1  | 1  | 1  | 487  | 53    | 9.23  | 0    | 100.2 | 99.1  | 90.9  | 100.9 | 97.2  | 111.7 |
| P43276 | <i>H1-5</i>     | Histone H1.5      | High   | 30 | 8  | 12 | 6  | 223  | 22.6  | 10.92 | 245  | 105.3 | 96.2  | 124.3 | 86.1  | 92.9  | 95.3  |
| Q61041 | <i>Npy4r</i>    | Neuropeptide Y    | Low    | 5  | 1  | 1  | 1  | 375  | 42.6  | 7.87  | 0    |       |       |       |       |       |       |
| Q641K5 | <i>Nuak1</i>    | NUAK family       | High   | 5  | 3  | 3  | 3  | 658  | 73.6  | 8.68  | 29   | 94.7  | 100.6 | 93.2  | 102.4 | 106.3 | 102.8 |
| Q9QUM9 | <i>PsmA6</i>    | Proteasome        | High   | 51 | 12 | 21 | 12 | 246  | 27.4  | 6.76  | 431  | 101.1 | 98    | 102.9 | 96.7  | 99.7  | 101.6 |
| Q9D1C8 | <i>Vps28</i>    | Vacuolar protein  | High   | 38 | 7  | 9  | 7  | 221  | 25.4  | 5.54  | 183  | 97.6  | 102.2 | 94.5  | 103.7 | 100.7 | 101.3 |
| Q9JJ18 | <i>Rpl38</i>    | 60S ribosomal     | High   | 31 | 3  | 8  | 3  | 70   | 8.2   | 10.1  | 81   | 105.1 | 106   | 100.6 | 102.3 | 95    | 91.1  |
| Q8BZ05 | <i>Arap2</i>    | Arf-GAP with      | High   | 2  | 2  | 2  | 2  | 1703 | 193.3 | 7.18  | 59   | 95.1  | 101.2 | 72.1  | 105   | 109.7 | 116.9 |
| P98084 | <i>Apba2</i>    | Amyloid-beta A4   | High   | 5  | 3  | 3  | 3  | 750  | 82.7  | 4.88  | 48   | 101.2 | 104.2 | 93.9  | 95.9  | 101   | 103.7 |
| Q9D1Q4 | <i>Dpm3</i>     | Dolichol-         | High   | 11 | 1  | 1  | 1  | 92   | 10.1  | 7.08  | 31   | 99.1  | 91.7  | 108.8 | 103.4 | 100.7 | 96.2  |
| P20917 | <i>Mag</i>      | Myelin-           | High   | 25 | 12 | 22 | 12 | 627  | 69.3  | 5.1   | 235  | 93.6  | 118   | 99.1  | 97    | 93.3  | 98.9  |
| Q60695 | <i>Rgl1</i>     | Ral guanine       | Medium | 1  | 1  | 1  | 1  | 768  | 86.3  | 6.09  | 25   | 96.6  | 105.2 | 120   | 92.8  | 94    | 91.2  |
| Q9CPP6 | <i>Ndufa5</i>   | NADH              | High   | 54 | 6  | 14 | 6  | 116  | 13.4  | 8.1   | 346  | 95.5  | 102.5 | 90.7  | 102.4 | 107.4 | 101.6 |
| Q3UJHJ | <i>Aak1</i>     | AP2-associated    | High   | 60 | 37 | 67 | 37 | 959  | 103.3 | 6.7   | 1389 | 96.1  | 98.4  | 93.1  | 104.9 | 104.6 | 102.8 |
| O88939 | <i>Zbtb7a</i>   | Zinc finger and   | Low    | 4  | 1  | 1  | 1  | 569  | 60.2  | 5.12  | 0    | 89    | 104.9 | 78.1  | 121.3 | 106.5 | 100.2 |
| Q8BFR5 | <i>Tufm</i>     | Elongation factor | High   | 64 | 24 | 52 | 24 | 452  | 49.5  | 7.56  | 1038 | 97.3  | 103.6 | 91.2  | 103.7 | 104.2 | 99.8  |
| Q3UYG8 | <i>MacroD2</i>  | ADP-ribose        | High   | 10 | 2  | 2  | 2  | 475  | 52.1  | 4.75  | 0    | 74    | 94.8  | 114.6 | 86.8  | 128.6 | 101.1 |
| P80314 | <i>Cct2</i>     | T-complex         | High   | 60 | 24 | 51 | 24 | 535  | 57.4  | 6.4   | 1315 | 99.2  | 101.6 | 99.9  | 98.4  | 101.7 | 99.2  |
| Q8BLY2 | <i>Tars3</i>    | Threonine--tRNA   | High   | 20 | 13 | 16 | 13 | 790  | 91.3  | 7.53  | 262  | 96.6  | 100.2 | 94.2  | 105.4 | 101.4 | 102.2 |
| Q8BIE6 | <i>FrmD4a</i>   | FERM domain-      | High   | 5  | 5  | 6  | 5  | 1020 | 113.8 | 8.92  | 38   | 93.8  | 95    | 95.2  | 102.9 | 105.1 | 108.1 |
| Q91YT0 | <i>Ndufv1</i>   | NADH              | High   | 41 | 16 | 35 | 16 | 464  | 50.8  | 8.21  | 606  | 93.5  | 102   | 91.9  | 104.7 | 100.6 | 107.3 |

|        |                 |                    |        |    |     |     |     |      |       |       |       |       |       |       |       |       |       |
|--------|-----------------|--------------------|--------|----|-----|-----|-----|------|-------|-------|-------|-------|-------|-------|-------|-------|-------|
| Q8C167 | <i>Prepl</i>    | Proyl              | High   | 29 | 14  | 19  | 14  | 725  | 83.1  | 6.65  | 236   | 99.7  | 98.7  | 95.9  | 101.2 | 99.7  | 104.8 |
| Q3UHK6 | <i>Tenm4</i>    | Teneurin-4         | High   | 7  | 16  | 17  | 14  | 2771 | 308.2 | 6.57  | 164   | 94.5  | 100.9 | 97.7  | 97.7  | 107.9 | 101.3 |
| Q8BTZ5 | <i>Ankrd46</i>  | Ankyrin repeat     | High   | 5  | 1   | 1   | 1   | 228  | 25.2  | 5.73  | 65    | 99.6  | 104.6 | 96.8  | 92.1  | 100.3 | 106.6 |
| P97290 | <i>Serping1</i> | Plasma protease    | High   | 8  | 3   | 3   | 3   | 504  | 55.5  | 6.29  | 71    | 143.1 | 84.5  | 159   | 65.2  | 70.8  | 77.3  |
| Q9CRC6 | <i>Borcs7</i>   | BLOC-1-related     | High   | 16 | 1   | 1   | 1   | 105  | 11.5  | 6.79  | 34    | 102.1 | 94.9  | 98.7  | 107   | 101.2 | 96    |
| P70257 | <i>Nfix</i>     | Nuclear factor 1   | High   | 4  | 2   | 3   | 2   | 488  | 53.4  | 8.68  | 54    | 99    | 92.1  | 102.8 | 103   | 102.3 | 100.8 |
| Q99JF5 | <i>Mvd</i>      | Diphosphomeval     | High   | 8  | 2   | 3   | 2   | 401  | 44    | 6.3   | 75    | 89.1  | 98.2  | 82.6  | 102.5 | 109.2 | 118.4 |
| Q9D1J1 | <i>Necap2</i>   | Adaptin ear-       | High   | 10 | 1   | 1   | 1   | 266  | 28.6  | 7.94  | 32    | 77.8  | 111.5 | 104.1 | 83.1  | 116.5 | 107.1 |
| Q6PIC6 | <i>Atp1a3</i>   | Sodium/potassiu    | High   | 53 | 52  | 441 | 33  | 1013 | 111.6 | 5.41  | 10825 | 96.2  | 98.7  | 92.5  | 104.6 | 104.3 | 103.7 |
| Q69ZZ6 | <i>Tmcc1</i>    | Transmembrane      | High   | 6  | 3   | 3   | 3   | 649  | 71.6  | 6.55  | 53    | 100.5 | 101.7 | 94.2  | 102.8 | 95.9  | 104.9 |
| P98203 | <i>Arvcf</i>    | Armadillo repeat   | High   | 8  | 6   | 8   | 6   | 962  | 105   | 6.64  | 94    | 94.9  | 102.4 | 100.2 | 100.9 | 101.4 | 100.3 |
| Q8BSL7 | <i>Arf2</i>     | ADP-ribosylation   | High   | 59 | 9   | 44  | 1   | 181  | 20.7  | 6.58  | 996   | 99.2  | 92.8  | 99.2  | 102.5 | 110.2 | 96.2  |
| P97291 | <i>Cdh8</i>     | Cadherin-8         | Low    | 1  | 1   | 1   | 1   | 799  | 88.2  | 4.74  | 0     |       |       |       |       |       |       |
| P56695 | <i>Wfs1</i>     | Wolframin          | High   | 17 | 13  | 17  | 13  | 890  | 100.5 | 7.97  | 332   | 107   | 96    | 135.7 | 75    | 93.6  | 92.6  |
| Q6PFR5 | <i>Tra2a</i>    | Transformer-2      | High   | 7  | 2   | 2   | 2   | 281  | 32.3  | 11.28 | 70    | 103.4 | 101.2 | 100.5 | 96.4  | 100   | 98.5  |
| P51655 | <i>Gpc4</i>     | Glypican-4         | High   | 8  | 3   | 3   | 3   | 557  | 62.5  | 6.33  | 73    | 95.8  | 100.2 | 99.4  | 94.2  | 96.6  | 113.9 |
| Q920Q4 | <i>Vps16</i>    | Vacuolar protein   | High   | 13 | 9   | 10  | 9   | 839  | 94.9  | 7.01  | 130   | 98.7  | 96.9  | 98.1  | 101.2 | 102.8 | 102.4 |
| P02088 | <i>Hbb-b1</i>   | Hemoglobin         | High   | 59 | 7   | 24  | 7   | 147  | 15.8  | 7.65  | 629   | 223.9 | 81.2  | 62.8  | 56.4  | 58    | 117.7 |
| P62862 | <i>Fau</i>      | 40S ribosomal      | High   | 17 | 1   | 4   | 1   | 59   | 6.6   | 12.15 | 84    | 98.3  | 98.2  | 105.8 | 109.8 | 92.1  | 95.8  |
| Q922M3 | <i>Kctd10</i>   | BTB/POZ            | High   | 9  | 2   | 2   | 2   | 315  | 35.7  | 6.34  | 0     | 109.4 | 83.5  | 108.5 | 104.1 | 98.9  | 95.7  |
| P54728 | <i>Rad23b</i>   | UV excision        | High   | 20 | 9   | 15  | 7   | 416  | 43.5  | 4.83  | 295   | 99.5  | 99.8  | 90    | 100.2 | 105.3 | 105.3 |
| Q99J08 | <i>Sec14l2</i>  | SEC14-like         | High   | 15 | 6   | 6   | 6   | 403  | 46.3  | 7.11  | 87    | 93.7  | 99.4  | 100   | 103.4 | 101.4 | 102.1 |
| Q9CQW2 | <i>Arl8b</i>    | ADP-ribosylation   | High   | 40 | 6   | 10  | 2   | 186  | 21.5  | 8.43  | 173   | 96.4  | 102.1 | 93.6  | 100.4 | 108.3 | 99.2  |
| P12815 | <i>Pdcd6</i>    | Programmed cell    | High   | 31 | 4   | 7   | 4   | 191  | 21.9  | 5.4   | 131   | 97.8  | 98.5  | 99.1  | 105.2 | 98.9  | 100.5 |
| Q91W50 | <i>Csde1</i>    | Cold shock         | High   | 28 | 21  | 24  | 21  | 798  | 88.7  | 6.37  | 216   | 100.4 | 101.8 | 96.2  | 102.5 | 99.2  | 99.9  |
| Q149F3 | <i>Gspt2</i>    | Eukaryotic         | High   | 12 | 7   | 8   | 2   | 632  | 69.1  | 5.2   | 97    | 101.6 | 95.4  | 104   | 99.7  | 100.7 | 98.7  |
| Q8K1X4 | <i>Nckap1l</i>  | Nck-associated     | High   | 5  | 6   | 6   | 4   | 1134 | 128.8 | 6.64  | 66    | 115.6 | 102.6 | 135.2 | 75.5  | 85    | 86    |
| Q6ZPL9 | <i>Ddx55</i>    | ATP-dependent      | Low    | 1  | 1   | 1   | 1   | 600  | 68.4  | 9.38  | 24    | 105.5 | 88.3  | 78.6  | 110.6 | 96.3  | 120.7 |
| P58871 | <i>Tnks1bp1</i> | 182 kDa            | High   | 12 | 14  | 16  | 14  | 1720 | 181.7 | 4.88  | 305   | 96    | 100   | 98    | 103.5 | 101.3 | 101.3 |
| P59017 | <i>Bcl2l13</i>  | Bcl-2-like protein | High   | 19 | 6   | 9   | 6   | 434  | 46.7  | 4.59  | 155   | 103   | 97.9  | 95.9  | 98.4  | 104   | 100.6 |
| Q8BNA6 | <i>Fat3</i>     | Protocadherin      | High   | 0  | 1   | 1   | 1   | 4555 | 501.7 | 4.87  | 22    | 102.8 | 89.9  | 91.7  | 106.1 | 110.3 | 99.2  |
| Q61738 | <i>Itga7</i>    | Integrin alpha-7   | High   | 3  | 3   | 3   | 3   | 1179 | 129.2 | 5.71  | 54    | 107.9 | 104.5 | 100.8 | 92.1  | 95.9  | 98.7  |
| Q8C3Q5 | <i>Shisa7</i>   | Protein shisa-7    | High   | 18 | 8   | 11  | 8   | 558  | 58.3  | 9.82  | 103   | 92.9  | 96.9  | 94.2  | 109.7 | 102.2 | 104.1 |
| P16546 | <i>Sptan1</i>   | Spectrin alpha     | High   | 72 | 166 | 475 | 166 | 2472 | 284.4 | 5.33  | 10319 | 97.9  | 100.2 | 93.5  | 102.2 | 104.3 | 102   |
| Q6PDI6 | <i>Mindy2</i>   | Ubiquitin          | Low    | 2  | 1   | 1   | 1   | 601  | 65.6  | 4.63  | 0     | 90.4  | 95.3  | 86.8  | 91    | 86.3  | 150.2 |
| Q924T2 | <i>Mrps2</i>    | 28S ribosomal      | High   | 9  | 2   | 2   | 2   | 291  | 32.3  | 9.14  | 22    | 91.8  | 101.5 | 92.8  | 100.9 | 105.4 | 107.7 |
| A2AR02 | <i>Ppig</i>     | Peptidyl-prolyl    | High   | 2  | 1   | 1   | 1   | 752  | 88.3  | 10.27 | 35    | 95.9  | 98.3  | 93    | 112.5 | 89.9  | 110.5 |
| Q91YM4 | <i>Tbrg4</i>    | FAST kinase        | High   | 10 | 5   | 5   | 5   | 630  | 71.5  | 8.34  | 70    | 96    | 100.5 | 98    | 103   | 98.4  | 104.1 |
| Q9Z1Q2 | <i>Abhd16a</i>  | Phosphatidylseri   | High   | 21 | 10  | 13  | 10  | 558  | 63    | 8.25  | 130   | 93.5  | 99.4  | 91.2  | 106.5 | 102.7 | 106.7 |
| Q3UHU5 | <i>Mtcl1</i>    | Microtubule        | High   | 2  | 6   | 6   | 1   | 1945 | 213.7 | 6.14  | 40    | 90.5  | 104   | 91.1  | 110.7 | 105.2 | 98.4  |
| Q8K3I4 | <i>Myrip</i>    | Rab effector       | High   | 1  | 1   | 1   | 1   | 856  | 94.9  | 6.07  | 30    |       |       |       |       |       |       |
| Q501J6 | <i>Ddx17</i>    | Probable ATP-      | High   | 28 | 17  | 28  | 12  | 650  | 72.4  | 8.59  | 527   | 103   | 95.2  | 103.2 | 101.2 | 101   | 96.4  |
| Q9DB34 | <i>Chmp2a</i>   | Charged            | High   | 27 | 7   | 7   | 7   | 222  | 25.1  | 5.97  | 61    | 100.7 | 93.7  | 101.4 | 106.8 | 98.5  | 98.9  |
| Q8BWU8 | <i>Etnpl</i>    | Ethanolamine-      | High   | 3  | 2   | 2   | 1   | 499  | 55.5  | 6.93  | 28    | 94.5  | 91.8  | 62.9  | 124.4 | 101.5 | 124.9 |
| P62983 | <i>Rps27a</i>   | Ubiquitin-40S      | High   | 30 | 5   | 109 | 5   | 156  | 17.9  | 9.64  | 1020  | 98.3  | 100.6 | 101.4 | 101.2 | 101.6 | 96.9  |
| P35831 | <i>Ptpn12</i>   | Tyrosine-protein   | High   | 3  | 2   | 2   | 2   | 775  | 86.5  | 5.99  | 29    | 124.5 | 109.3 | 57.1  | 100.3 | 62.5  | 146.3 |
| Q9D2N9 | <i>Vps33a</i>   | Vacuolar protein   | High   | 27 | 14  | 14  | 14  | 598  | 67.5  | 7.08  | 184   | 101   | 96.9  | 96.5  | 102   | 100.1 | 103.5 |
| Q8R5C5 | <i>Actr1b</i>   | Beta-centractin    | High   | 46 | 13  | 31  | 8   | 376  | 42.3  | 6.4   | 552   | 93.2  | 100   | 94.1  | 102.6 | 105.5 | 104.6 |
| Q6P549 | <i>Inpp1</i>    | Phosphatidylinos   | High   | 1  | 1   | 1   | 1   | 1257 | 138.9 | 6.54  | 30    |       |       |       |       |       |       |
| Q8BQP9 | <i>Rgs7bp</i>   | Regulator of G-    | High   | 29 | 5   | 6   | 5   | 257  | 29    | 8.46  | 70    | 93.8  | 101.4 | 86.8  | 107.4 | 106.4 | 104.1 |
| Q9EPU4 | <i>Cpsf1</i>    | Cleavage and       | High   | 1  | 2   | 2   | 2   | 1441 | 160.7 | 6.39  | 30    | 95.4  | 93.5  | 94.8  | 101   | 109.5 | 105.8 |
| Q9D0R8 | <i>Lsm12</i>    | Protein LSM12      | High   | 22 | 3   | 4   | 3   | 195  | 21.7  | 7.74  | 79    | 104.2 | 100.5 | 109.5 | 95.6  | 95.5  | 94.6  |
| Q8BL74 | <i>Gtf3c2</i>   | General            | Low    | 1  | 1   | 1   | 1   | 907  | 100.2 | 6.57  | 0     | 100.2 | 112.6 | 108.2 | 94.5  | 101.2 | 83.4  |
| Q35345 | <i>Kpna6</i>    | Importin subunit   | High   | 22 | 8   | 8   | 5   | 536  | 59.9  | 4.94  | 122   | 96.7  | 95.9  | 99.2  | 105   | 97.9  | 105.4 |
| Q8R1F1 | <i>Niban2</i>   | Protein Niban 2    | High   | 7  | 5   | 7   | 5   | 749  | 84.8  | 5.94  | 96    | 108.4 | 100.5 | 119.5 | 90.7  | 88.8  | 92.1  |
| Q8VDD8 | <i>Washc1</i>   | WASH complex       | High   | 13 | 4   | 4   | 4   | 475  | 51.6  | 5.44  | 59    | 101.5 | 101   | 105.7 | 98.8  | 103.8 | 89.2  |
| Q7M750 | <i>Opalin</i>   | Opalin OS=Mus      | High   | 22 | 2   | 2   | 2   | 143  | 15.8  | 4.88  | 16    | 90.2  | 104.9 | 89.6  | 103   | 104.1 | 108.2 |
| G5E870 | <i>Trip12</i>   | E3 ubiquitin-      | High   | 3  | 4   | 5   | 4   | 2025 | 224   | 8.35  | 59    | 105   | 99.5  | 91.4  | 97.4  | 98.7  | 107.9 |
| O08739 | <i>Ampd3</i>    | AMP deaminase      | High   | 6  | 5   | 5   | 5   | 766  | 88.6  | 7.33  | 57    | 105.3 | 102.7 | 110.6 | 93.5  | 92.2  | 95.7  |
| Q8BMG8 | <i>Slc25a32</i> | Mitochondrial      | High   | 6  | 1   | 1   | 1   | 316  | 35    | 9.47  | 70    | 103.8 | 98.6  | 90.8  | 97.2  | 107.9 | 101.7 |
| P60710 | <i>Actb</i>     | Actin,             | High   | 63 | 19  | 448 | 1   | 375  | 41.7  | 5.48  | 11725 | 100.3 | 95.7  | 114.6 | 94.4  | 96.7  | 98.4  |
| P24270 | <i>Cat</i>      | Catalase           | High   | 33 | 15  | 15  | 15  | 527  | 59.8  | 7.88  | 149   | 101.9 | 101.6 | 109.4 | 92.7  | 94.6  | 99.8  |
| Q68ED2 | <i>Grm7</i>     | Metabotropic       | High   | 12 | 9   | 11  | 9   | 915  | 102.2 | 7.88  | 259   | 89.6  | 96.1  | 95.8  | 104.6 | 108.6 | 105.3 |
| Q8K2Y9 | <i>Ccm2</i>     | Cerebral           | High   | 7  | 2   | 2   | 2   | 453  | 49.9  | 5.62  | 51    | 99.9  | 94.5  | 78.4  | 90.1  | 103.2 | 133.9 |
| P62962 | <i>Pfn1</i>     | Profilin-1         | High   | 90 | 11  | 39  | 11  | 140  | 14.9  | 8.28  | 863   | 105.1 | 103.4 | 114.4 | 90.5  | 95.6  | 91.1  |
| Q9WTR6 | <i>Slc7a11</i>  | Cystine/glutamat   | High   | 5  | 2   | 2   | 2   | 502  | 55.4  | 9.23  | 21    |       |       |       |       |       |       |
| Q9CZV8 | <i>Fbxl20</i>   | F-box/LRR-         | Medium | 2  | 1   | 1   | 1   | 436  | 48.4  | 7.49  | 14    | 99.5  | 101.7 | 94.9  | 94.7  | 110.4 | 98.7  |
| O89116 | <i>Vti1a</i>    | Vesicle transport  | High   | 21 | 4   | 5   | 4   | 217  | 25    | 6.4   | 111   | 101.1 | 100.2 | 94.3  | 101.8 | 99.6  | 103.1 |

|        |                 |                   |        |    |    |    |    |      |       |      |      |       |       |       |       |       |       |
|--------|-----------------|-------------------|--------|----|----|----|----|------|-------|------|------|-------|-------|-------|-------|-------|-------|
| P70372 | <i>Elavl1</i>   | ELAV-like         | High   | 24 | 6  | 9  | 6  | 326  | 36.1  | 9.04 | 199  | 97.5  | 98.8  | 100   | 100.9 | 101.5 | 101.3 |
| O08550 | <i>Kmt2b</i>    | Histone-lysine N- | Medium | 0  | 1  | 2  | 1  | 2713 | 294.6 | 8.1  | 39   | 88.5  | 88    | 86.3  | 98.9  | 110.3 | 128   |
| O70481 | <i>Ubr1</i>     | E3 ubiquitin-     | High   | 2  | 3  | 3  | 3  | 1757 | 200.1 | 6.05 | 52   | 102.2 | 104.8 | 99    | 99.9  | 99.3  | 94.7  |
| Q5DU41 | <i>Lrrc8b</i>   | Volume-           | High   | 4  | 3  | 3  | 3  | 803  | 92.1  | 6.7  | 62   | 93.5  | 94.4  | 93.6  | 111.5 | 102.8 | 104.2 |
| Q6PCX9 | <i>Trim37</i>   | E3 ubiquitin-     | Low    | 1  | 1  | 1  | 1  | 961  | 107.6 | 5.21 | 19   | 87.2  | 97.5  | 95.2  | 98.8  | 104.6 | 116.7 |
| E9PV86 | <i>Mctp1</i>    | Multiple C2 and   | High   | 2  | 2  | 2  | 2  | 951  | 106.7 | 8.37 | 25   | 89    | 108.9 | 94.2  | 108.9 | 94    | 104.9 |
| Q80Y17 | <i>Ligl1</i>    | Lethal(2) giant   | High   | 11 | 8  | 9  | 8  | 1036 | 112.5 | 6.48 | 129  | 95.6  | 102.1 | 95    | 101.3 | 101.3 | 104.7 |
| Q5M8N0 | <i>Cnrip1</i>   | CB1 cannabinoid   | High   | 44 | 6  | 13 | 6  | 164  | 18.6  | 7.96 | 271  | 93.7  | 95    | 88.9  | 107.3 | 110   | 105.2 |
| Q9DCH6 | <i>Zfand6</i>   | AN1-type zinc     | Low    | 5  | 1  | 1  | 1  | 223  | 24    | 6.51 | 0    | 111.7 | 101.4 | 71.2  | 107.4 | 118.3 | 90    |
| O35963 | <i>Rab33b</i>   | Ras-related       | High   | 23 | 4  | 10 | 2  | 229  | 25.8  | 7.69 | 133  | 91    | 100   | 98.4  | 103.5 | 99.7  | 107.5 |
| A2ASZ8 | <i>Slc25a25</i> | Calcium-binding   | High   | 8  | 4  | 6  | 2  | 469  | 52.6  | 8.54 | 75   | 98.8  | 100   | 92.8  | 104.2 | 104.6 | 99.5  |
| Q08509 | <i>Eps8</i>     | Epidermal         | High   | 6  | 3  | 4  | 3  | 821  | 91.7  | 7.65 | 88   | 93.7  | 89.4  | 102   | 103.3 | 105.6 | 105.9 |
| Q9ES52 | <i>Inpp5d</i>   | Phosphatidylinos  | Medium | 1  | 1  | 1  | 1  | 1191 | 133.5 | 7.8  | 0    |       |       |       |       |       |       |
| Q8CGA4 | <i>Mturm</i>    | Maturin OS=Mus    | High   | 15 | 2  | 2  | 2  | 131  | 14.8  | 4.17 | 23   | 96.3  | 94    | 95    | 101.7 | 99.6  | 113.4 |
| Q9CXK9 | <i>Rbm33</i>    | RNA-binding       | High   | 1  | 1  | 1  | 1  | 1231 | 137.2 | 6.46 | 39   | 93.8  | 104.5 | 108.3 | 98.2  | 98.6  | 96.6  |
| Q9CY73 | <i>Mrp144</i>   | 39S ribosomal     | High   | 6  | 2  | 2  | 2  | 333  | 37.5  | 8.51 | 50   | 82.2  | 76.2  | 69.5  | 98.7  | 87.9  | 185.6 |
| O08644 | <i>Ephb6</i>    | Ephrin type-B     | High   | 2  | 2  | 2  | 1  | 1014 | 110   | 6.83 | 39   | 87    | 104.3 | 80.2  | 117.3 | 104   | 107.2 |
| O55222 | <i>Ilk</i>      | Integrin-linked   | High   | 14 | 6  | 8  | 6  | 452  | 51.3  | 8.07 | 150  | 106.3 | 99.4  | 114.1 | 90    | 91.4  | 98.7  |
| Q8K3H0 | <i>App1</i>     | DCC-interacting   | High   | 20 | 11 | 14 | 11 | 707  | 79.3  | 5.41 | 207  | 100.1 | 97.1  | 101.5 | 100.4 | 100.8 | 100.2 |
| Q9EPR4 | <i>Slc23a2</i>  | Solute carrier    | High   | 5  | 2  | 3  | 2  | 648  | 70    | 7.5  | 43   | 96.4  | 95.1  | 93    | 103.9 | 109.6 | 102.1 |
| Q68FL6 | <i>Mars1</i>    | Methionine--      | High   | 21 | 16 | 18 | 16 | 902  | 101.4 | 7.14 | 143  | 98.4  | 100.7 | 97    | 101.4 | 100.6 | 101.8 |
| Q922Q9 | <i>Chid1</i>    | Chitinase         | High   | 19 | 6  | 9  | 6  | 393  | 44.9  | 7.97 | 143  | 96.6  | 98.5  | 100.5 | 103   | 102.6 | 98.8  |
| E9PXF8 | <i>Sbf2</i>     | Myotubularin-     | High   | 3  | 5  | 5  | 3  | 1872 | 210.3 | 7.28 | 16   | 93    | 96.2  | 99.2  | 100.8 | 102.8 | 108   |
| Q8CF89 | <i>Tab1</i>     | TGF-beta-         | High   | 7  | 2  | 2  | 2  | 502  | 54.6  | 5.52 | 49   | 101.6 | 102.3 | 91    | 103   | 103.4 | 98.7  |
| Q61062 | <i>Dvl3</i>     | Segment polarity  | High   | 3  | 2  | 2  | 1  | 716  | 78.1  | 6.65 | 53   | 95.8  | 110   | 104.3 | 100.3 | 100.4 | 89.1  |
| Q9CZU3 | <i>Mtrex</i>    | Exosome RNA       | Medium | 1  | 1  | 1  | 1  | 1040 | 117.6 | 6.4  | 24   | 107.9 | 113.8 | 101.4 | 99.4  | 88.4  | 89.1  |
| Q8VEE0 | <i>Rpe</i>      | Ribulose-         | High   | 8  | 1  | 1  | 1  | 228  | 24.9  | 5.41 | 36   | 99.6  | 96.2  | 102.4 | 102.8 | 89.7  | 109.1 |
| P28063 | <i>Psmb8</i>    | Proteasome        | High   | 13 | 3  | 3  | 3  | 276  | 30.2  | 6.68 | 59   | 131   | 117   | 168   | 61.1  | 63.8  | 59    |
| P54822 | <i>Adsl</i>     | Adenylosuccinat   | High   | 18 | 7  | 9  | 7  | 484  | 54.8  | 7.27 | 112  | 105.4 | 105.4 | 102.8 | 97.7  | 91.5  | 97.2  |
| Q8BHF7 | <i>Pgs1</i>     | CDP-              | High   | 15 | 7  | 8  | 7  | 553  | 62.5  | 8.9  | 92   | 99.8  | 104.7 | 99.4  | 97.9  | 96.6  | 101.5 |
| P97351 | <i>Rps3a</i>    | 40S ribosomal     | High   | 48 | 13 | 19 | 13 | 264  | 29.9  | 9.73 | 259  | 104.9 | 101.4 | 103.5 | 96.7  | 96.1  | 97.4  |
| Q6P9R2 | <i>Oxsr1</i>    | Serine/threonine  | High   | 16 | 6  | 9  | 5  | 527  | 58.2  | 6.43 | 214  | 91.6  | 99.7  | 103.1 | 100.3 | 102.6 | 102.8 |
| P51150 | <i>Rab7a</i>    | Ras-related       | High   | 80 | 17 | 46 | 17 | 207  | 23.5  | 6.7  | 973  | 97.9  | 99.1  | 95.4  | 103.3 | 102.6 | 101.6 |
| Q91VM3 | <i>Wdr45</i>    | WD repeat         | High   | 9  | 3  | 3  | 3  | 360  | 39.8  | 6.99 | 35   | 95.3  | 102.3 | 97.2  | 98.6  | 96.5  | 110.1 |
| P62082 | <i>Rps7</i>     | 40S ribosomal     | High   | 38 | 7  | 14 | 7  | 194  | 22.1  | 10.1 | 297  | 103.8 | 99.4  | 105.2 | 101   | 98.2  | 92.4  |
| Q8R001 | <i>Mapre2</i>   | Microtubule-      | High   | 41 | 11 | 21 | 10 | 326  | 36.9  | 5.38 | 282  | 96.7  | 103.4 | 87.5  | 108   | 98    | 106.4 |
| Q9DCR2 | <i>Ap3s1</i>    | AP-3 complex      | High   | 32 | 5  | 7  | 5  | 193  | 21.7  | 5.39 | 118  | 96.5  | 95.6  | 92.3  | 101.2 | 108.8 | 105.8 |
| Q8BGH7 | <i>Cdc42se2</i> | CDC42 small       | High   | 23 | 1  | 1  | 1  | 84   | 9.2   | 8.35 | 41   | 95.2  | 102.5 | 89.4  | 106.2 | 110.3 | 96.3  |
| P11438 | <i>Lamp1</i>    | Lysosome-         | High   | 8  | 3  | 6  | 3  | 406  | 43.8  | 8.4  | 136  | 111.4 | 104.7 | 127.9 | 86.2  | 83.6  | 86.3  |
| Q8BHW2 | <i>Oscp1</i>    | Protein OSCP1     | High   | 20 | 6  | 6  | 6  | 379  | 43.2  | 7.2  | 107  | 94.3  | 99.7  | 93.4  | 102.7 | 104.9 | 104.9 |
| P23818 | <i>Gria1</i>    | Glutamate         | High   | 21 | 16 | 28 | 13 | 907  | 101.5 | 7.69 | 554  | 93.7  | 94.5  | 115   | 97    | 100.3 | 99.5  |
| Q80U63 | <i>Mfn2</i>     | Mitofusin-2       | High   | 18 | 12 | 19 | 11 | 757  | 86.1  | 6.77 | 308  | 94.6  | 97.7  | 90.8  | 106   | 107.6 | 103.4 |
| Q3TXU5 | <i>Dhps</i>     | Deoxyhypusine     | Medium | 3  | 1  | 1  | 1  | 369  | 40.6  | 5.67 | 0    | 92.3  | 96.2  | 102.4 | 101.7 | 96.5  | 110.9 |
| D3YVF0 | <i>Akap5</i>    | A-kinase anchor   | High   | 57 | 23 | 41 | 23 | 745  | 79.4  | 4.75 | 937  | 94.9  | 98.4  | 90.1  | 102.5 | 107.1 | 106.9 |
| Q9DB41 | <i>Slc25a18</i> | Mitochondrial     | High   | 26 | 8  | 10 | 6  | 320  | 34.1  | 9.19 | 149  | 103.2 | 112   | 96.8  | 98.3  | 94.2  | 95.6  |
| A6H5Y1 | <i>Mphosph9</i> | M-phase           | Low    | 1  | 1  | 1  | 1  | 991  | 109.9 | 6.6  | 0    | 98.4  | 114.9 | 97.2  | 102.8 | 98.3  | 88.5  |
| Q99KV1 | <i>Dnajb11</i>  | DnaJ homolog      | High   | 23 | 7  | 9  | 7  | 358  | 40.5  | 6.32 | 134  | 102.5 | 99.6  | 108   | 95    | 96.2  | 98.7  |
| P23198 | <i>Cbx3</i>     | Chromobox         | High   | 34 | 7  | 13 | 5  | 183  | 20.8  | 5.22 | 246  | 105.5 | 96.6  | 103.8 | 98    | 96.8  | 99.2  |
| P60202 | <i>Plp1</i>     | Myelin            | High   | 35 | 11 | 76 | 11 | 277  | 30.1  | 8.35 | 1378 | 94.1  | 129.1 | 103.7 | 95.1  | 88.1  | 90    |
| Q8VED9 | <i>Lgalsl</i>   | Galectin-related  | High   | 43 | 6  | 9  | 6  | 172  | 18.9  | 5.35 | 210  | 97.3  | 99    | 90.1  | 109.7 | 103.5 | 100.5 |
| P11531 | <i>Dmd</i>      | Dystrophin        | High   | 3  | 8  | 8  | 8  | 3678 | 425.6 | 5.94 | 118  | 97    | 98.1  | 93.8  | 98.8  | 107   | 105.4 |
| Q9CQC7 | <i>Ndufb4</i>   | NADH              | High   | 47 | 5  | 12 | 5  | 129  | 15.1  | 9.89 | 230  | 101.5 | 101.8 | 97    | 100.9 | 101.8 | 97    |
| P48722 | <i>Hspa4l</i>   | Heat shock 70     | High   | 60 | 39 | 67 | 37 | 838  | 94.3  | 5.74 | 1393 | 96.6  | 102.7 | 94.5  | 101.8 | 101.8 | 102.6 |
| Q8R2H9 | <i>Phospho1</i> | Phosphoethanol    | Medium | 3  | 1  | 1  | 1  | 267  | 29.9  | 7.94 | 24   |       |       |       |       |       |       |
| P63276 | <i>Rps17</i>    | 40S ribosomal     | High   | 41 | 7  | 8  | 7  | 135  | 15.5  | 9.85 | 161  | 101.4 | 98.1  | 105.7 | 95.3  | 101   | 98.4  |
| Q8BT14 | <i>Cnot4</i>    | CCR4-NOT          | High   | 3  | 2  | 3  | 2  | 575  | 63.4  | 7.03 | 18   | 96.3  | 106   | 94    | 101.7 | 104.1 | 97.8  |
| P49615 | <i>Cdk5</i>     | Cyclin-           | High   | 51 | 14 | 23 | 12 | 292  | 33.3  | 7.66 | 294  | 94.5  | 96.8  | 89.9  | 105   | 108.3 | 105.5 |
| Q78JW9 | <i>Ubf1</i>     | Ubiquitin         | High   | 11 | 3  | 5  | 3  | 368  | 40.1  | 8.85 | 190  | 98.7  | 94.6  | 96.2  | 104.2 | 102.7 | 103.5 |
| P60764 | <i>Rac3</i>     | Ras-related C3    | High   | 27 | 5  | 17 | 1  | 192  | 21.4  | 8.15 | 347  | 90.1  | 94.7  | 102.8 | 98.4  | 110.6 | 103.4 |
| Q61772 | <i>Epha7</i>    | Ephrin type-A     | High   | 5  | 4  | 5  | 1  | 998  | 111.8 | 5.86 | 97   | 92.8  | 99.4  | 93.8  | 95.2  | 103.4 | 115.5 |
| Q5SSL4 | <i>Abr</i>      | Active            | High   | 31 | 23 | 34 | 21 | 859  | 97.6  | 6.58 | 639  | 97.2  | 99    | 95.9  | 104.3 | 101.8 | 101.8 |
| Q9JKZ2 | <i>Slc5a3</i>   | Sodium/myo-       | High   | 6  | 3  | 4  | 3  | 718  | 79.5  | 7.3  | 76   | 121.3 | 101.8 | 142   | 74.9  | 77.9  | 82.1  |
| Q8C0Q9 | <i>Rapgef5</i>  | Rap guanine       | High   | 3  | 2  | 3  | 1  | 814  | 93.7  | 6.16 | 97   |       |       |       |       |       |       |
| Q8BH58 | <i>Tipr1</i>    | TIP41-like        | High   | 31 | 7  | 9  | 7  | 271  | 31.2  | 5.63 | 125  | 101.1 | 99.5  | 96.2  | 100.4 | 104.7 | 98    |
| Q9R008 | <i>Mvk</i>      | Mevalonate        | High   | 11 | 3  | 3  | 3  | 395  | 41.9  | 6.68 | 92   | 96.8  | 92.8  | 101.7 | 101.3 | 93.5  | 113.9 |
| Q9ERR7 | <i>Selenof</i>  | Selenoprotein F   | High   | 18 | 2  | 3  | 2  | 162  | 17.8  | 5.35 | 77   | 106   | 101.6 | 99.8  | 96.1  | 98    | 98.4  |
| Q8R3H9 | <i>Ttc4</i>     | Tetratricopeptide | Medium | 3  | 1  | 1  | 1  | 386  | 44.3  | 5.22 | 16   | 98.2  | 100.1 | 102.4 | 101.5 | 98.1  | 99.7  |
| O55017 | <i>Cacna1b</i>  | Voltage-          | High   | 2  | 4  | 4  | 4  | 2327 | 261.3 | 8.59 | 44   | 90.5  | 99.4  | 87.7  | 111.2 | 102.9 | 108.3 |

|        |                |                  |        |    |    |    |    |      |       |       |     |       |       |       |       |       |       |
|--------|----------------|------------------|--------|----|----|----|----|------|-------|-------|-----|-------|-------|-------|-------|-------|-------|
| Q3V2J0 | <i>Cibar2</i>  | CBY1-interacting | Low    | 2  | 1  | 1  | 1  | 292  | 33.3  | 6.11  | 25  | 97.4  | 100.1 | 86.3  | 108.1 | 101.7 | 106.4 |
| Q3UFS0 | <i>Zyg11b</i>  | Protein zyg-11   | High   | 9  | 5  | 6  | 5  | 744  | 83.9  | 6.87  | 52  | 101.3 | 98.2  | 97.9  | 106.6 | 99.7  | 96.4  |
| Q60805 | <i>Mertk</i>   | Tyrosine-protein | High   | 5  | 4  | 4  | 4  | 994  | 110.1 | 5.5   | 54  | 102.2 | 97.6  | 106.1 | 96.9  | 95.5  | 101.8 |
| P01942 | <i>Hba</i>     | Hemoglobin       | High   | 43 | 6  | 20 | 6  | 142  | 15.1  | 8.22  | 181 | 209.5 | 82.7  | 62.3  | 61.2  | 62.8  | 121.5 |
| Q8BHC1 | <i>Rab39b</i>  | Ras-related      | High   | 48 | 10 | 19 | 9  | 213  | 24.6  | 7.83  | 342 | 94.1  | 99.9  | 93.3  | 106.3 | 103   | 103.4 |
| Q8CGF5 | <i>Tlcd4</i>   | TLC domain-      | High   | 5  | 1  | 1  | 1  | 276  | 31.2  | 8.57  | 43  | 87    | 99.1  | 98.9  | 102.7 | 98.3  | 114.1 |
| Q3UYH7 | <i>Adrbk2</i>  | Beta-adrenergic  | High   | 13 | 7  | 9  | 2  | 688  | 79.6  | 7.69  | 228 | 93.8  | 94.5  | 93.6  | 102.7 | 107.7 | 107.6 |
| Q5RJI5 | <i>Brsk1</i>   | Serine/threonine | High   | 19 | 12 | 16 | 9  | 778  | 85.1  | 9.32  | 134 | 95.5  | 96.5  | 91.7  | 106.2 | 106.8 | 103.3 |
| P52189 | <i>Kcnj4</i>   | Inward rectifier | High   | 2  | 1  | 1  | 1  | 445  | 49.9  | 6.21  | 37  | 85.2  | 92    | 106.4 | 95.7  | 108.7 | 112   |
| P70336 | <i>Rock2</i>   | Rho-associated   | High   | 35 | 42 | 52 | 42 | 1388 | 160.5 | 5.99  | 704 | 96.3  | 100.6 | 90    | 104.5 | 103.9 | 104.7 |
| Q60857 | <i>Slc6a4</i>  | Sodium-          | Medium | 1  | 1  | 1  | 1  | 630  | 70    | 6.18  | 14  |       |       |       |       |       |       |
| P70398 | <i>Usp9x</i>   | Probable         | High   | 18 | 39 | 55 | 39 | 2559 | 290.5 | 5.87  | 612 | 97.3  | 100.4 | 97.1  | 103   | 99.5  | 102.8 |
| P28650 | <i>Adss1</i>   | Adenylosuccinat  | High   | 33 | 11 | 16 | 10 | 457  | 50.2  | 8.43  | 336 | 97.4  | 111.6 | 100.1 | 102.2 | 94.4  | 94.3  |
| Q920A5 | <i>Scpep1</i>  | Retinoid-        | High   | 11 | 5  | 6  | 5  | 452  | 50.9  | 5.66  | 98  | 109.3 | 101.3 | 129.3 | 84.3  | 81.5  | 94.4  |
| P0C0A3 | <i>Chmp6</i>   | Charged          | High   | 25 | 3  | 4  | 3  | 200  | 23.4  | 5.44  | 119 | 93.3  | 97.8  | 93    | 105.9 | 101.5 | 108.5 |
| Q80TG9 | <i>Lrfn2</i>   | Leucine-rich     | High   | 3  | 2  | 3  | 2  | 788  | 84.9  | 6.74  | 52  | 96.2  | 97.9  | 94.4  | 95.6  | 104.9 | 111   |
| Q9ER39 | <i>Tor1a</i>   | Torsin-1A        | High   | 10 | 3  | 4  | 3  | 333  | 37.8  | 7.17  | 38  | 87.8  | 107.8 | 101.5 | 97.7  | 104.5 | 100.7 |
| P70663 | <i>Sparcl1</i> | SPARC-like       | High   | 14 | 7  | 9  | 7  | 650  | 72.2  | 4.6   | 130 | 108.5 | 93.5  | 104.9 | 97.8  | 98    | 97.3  |
| Q80TQ2 | <i>Cyld</i>    | Ubiquitin        | High   | 17 | 13 | 16 | 13 | 952  | 106.5 | 5.63  | 199 | 91.1  | 97.4  | 93.8  | 103.3 | 100.6 | 113.7 |
| Q6A068 | <i>Cdc5l</i>   | Cell division    | High   | 18 | 10 | 11 | 10 | 802  | 92.1  | 8.02  | 225 | 98.7  | 96    | 102.7 | 103   | 100.4 | 99.2  |
| Q99KI3 | <i>Emc3</i>    | ER membrane      | High   | 23 | 5  | 7  | 5  | 261  | 30    | 6.81  | 98  | 100.7 | 97.4  | 101.5 | 99.7  | 97.1  | 103.6 |
| Q8K4B0 | <i>Mta1</i>    | Metastasis-      | High   | 12 | 8  | 10 | 7  | 715  | 80.7  | 9.29  | 133 | 103   | 96.7  | 100.9 | 95.5  | 101.4 | 102.5 |
| Q99M87 | <i>Dnaja3</i>  | DnaJ homolog     | High   | 24 | 9  | 12 | 9  | 480  | 52.4  | 9.22  | 246 | 94.7  | 101.2 | 96.3  | 103.8 | 101.1 | 102.9 |
| Q8R1G2 | <i>Cmb1</i>    | Carboxymethyle   | High   | 20 | 3  | 4  | 3  | 245  | 27.9  | 7.18  | 52  | 99.4  | 93.4  | 102.5 | 98    | 101.3 | 105.5 |
| Q5SXY1 | <i>Specc1</i>  | Cytospin-B       | High   | 9  | 10 | 12 | 9  | 1067 | 118   | 6.64  | 171 | 99    | 101.1 | 106.2 | 97.5  | 100.7 | 95.4  |
| P23242 | <i>Gja1</i>    | Gap junction     | High   | 22 | 5  | 5  | 5  | 382  | 43    | 8.76  | 95  | 117.6 | 95.7  | 143.1 | 82.9  | 79.4  | 81.3  |
| Q80VP5 |                | Probable peptide | Medium | 10 | 1  | 1  | 1  | 184  | 20.8  | 9.92  | 22  | 97.6  | 99.8  | 113.6 | 96.2  | 95.4  | 97.4  |
| Q8K296 | <i>Mttr3</i>   | Myotubularin-    | High   | 2  | 2  | 2  | 2  | 1196 | 133.8 | 5.83  | 40  | 101.5 | 90.4  | 88.3  | 99.2  | 101.5 | 119.1 |
| Q99N85 | <i>Mrps18a</i> | 28S ribosomal    | High   | 6  | 1  | 1  | 1  | 196  | 22.3  | 10.18 | 44  | 94.5  | 97.1  | 108   | 90.8  | 99.7  | 110   |
| Q9JL35 | <i>Hmgn5</i>   | High mobility    | High   | 7  | 2  | 2  | 2  | 406  | 45.3  | 4.37  | 0   |       |       |       |       |       |       |
| P58021 | <i>Tm9sf2</i>  | Transmembrane    | High   | 8  | 4  | 5  | 4  | 662  | 75.3  | 7.43  | 102 | 100.3 | 102.6 | 109.1 | 95.3  | 97.2  | 95.5  |
| Q3US41 | <i>Esrp1</i>   | Epithelial       | Medium | 3  | 1  | 1  | 1  | 680  | 75.5  | 6.58  | 0   | 88.8  | 111.2 | 46.2  | 137.6 | 113.2 | 103   |
| Q8CGA3 | <i>Slc43a2</i> | Large neutral    | High   | 2  | 1  | 1  | 1  | 568  | 62.4  | 7.93  | 33  | 102.5 | 91.9  | 101.8 | 109.2 | 90.5  | 104   |
| O09126 | <i>Sema4d</i>  | Semaphorin-4D    | High   | 4  | 2  | 2  | 2  | 861  | 95.6  | 7.81  | 38  | 101.9 | 100.6 | 102   | 96.8  | 102.3 | 96.4  |
| P16045 | <i>Lgals1</i>  | Galectin-1       | High   | 64 | 8  | 16 | 8  | 135  | 14.9  | 5.49  | 286 | 117.1 | 104.2 | 166.3 | 63.7  | 66.9  | 81.7  |
| Q8BGC0 | <i>Htatsf1</i> | HIV Tat-specific | High   | 2  | 2  | 3  | 2  | 757  | 86.2  | 4.4   | 23  | 103.2 | 95.6  | 107.9 | 100.9 | 96.2  | 96.2  |
| C0HKD8 | <i>Mfap1a</i>  | Microfibrillar-  | High   | 5  | 2  | 2  | 2  | 439  | 51.9  | 4.98  | 19  | 96.1  | 102.9 | 103.9 | 95.4  | 98.8  | 103   |
| Q99KE1 | <i>Me2</i>     | NAD-dependent    | High   | 21 | 10 | 11 | 9  | 589  | 65.8  | 7.61  | 161 | 95.2  | 96.1  | 99.8  | 100.5 | 103.8 | 104.6 |
| Q6NTA4 | <i>Rragb</i>   | Ras-related      | High   | 16 | 4  | 4  | 2  | 374  | 43.2  | 6.38  | 52  | 108.5 | 100.4 | 102.9 | 95.5  | 94.4  | 98.3  |
| Q9DAK9 | <i>Phpt1</i>   | 14 kDa           | High   | 51 | 5  | 10 | 5  | 124  | 14    | 5.53  | 179 | 97.9  | 94.1  | 98.7  | 100.6 | 106.3 | 102.4 |
| P70362 | <i>Ufd1</i>    | Ubiquitin        | High   | 40 | 9  | 11 | 9  | 307  | 34.5  | 6.7   | 92  | 96.5  | 100.3 | 97.2  | 101.5 | 103.3 | 101.3 |
| Q8K298 | <i>Anln</i>    | Anillin OS=Mus   | High   | 8  | 8  | 9  | 8  | 1121 | 122.7 | 6.98  | 61  | 97    | 116.2 | 103.7 | 92.7  | 97.8  | 92.7  |
| Q9WUB3 | <i>Pygm</i>    | Glycogen         | High   | 41 | 32 | 49 | 25 | 842  | 97.2  | 7.11  | 941 | 99.3  | 108.7 | 87.1  | 106.3 | 100.7 | 97.8  |
| Q6PHZ8 | <i>Kcnp4</i>   | Kv channel-      | High   | 15 | 3  | 3  | 3  | 250  | 28.7  | 5.21  | 98  | 98    | 94.1  | 96.6  | 105.9 | 101.8 | 103.6 |
| Q9CYZ2 | <i>Tpd52l2</i> | Tumor protein    | High   | 41 | 7  | 9  | 7  | 220  | 24    | 6.15  | 168 | 105.5 | 100.8 | 106.9 | 93.6  | 95.5  | 97.7  |
| Q9QZ85 | <i>Iigp1</i>   | Interferon-      | High   | 15 | 5  | 5  | 5  | 413  | 47.5  | 6.33  | 109 | 92.5  | 126.6 | 207.1 | 56.4  | 58.4  | 59.1  |
| Q60710 | <i>Samhd1</i>  | Deoxynucleoside  | High   | 11 | 5  | 6  | 5  | 658  | 75.8  | 7.93  | 109 | 112   | 109.6 | 159.2 | 66.2  | 75.6  | 77.3  |
| Q6PIU9 |                | Uncharacterized  | High   | 5  | 1  | 1  | 1  | 354  | 37.7  | 5.07  | 23  | 97.1  | 102.4 | 99.7  | 106.6 | 104.4 | 89.8  |
| P35235 | <i>Ptpn11</i>  | Tyrosine-protein | High   | 33 | 16 | 17 | 16 | 593  | 68    | 7.3   | 223 | 97.5  | 100.4 | 93.4  | 102.4 | 101.3 | 105.1 |
| A2BH40 | <i>Arid1a</i>  | AT-rich          | High   | 2  | 4  | 4  | 3  | 2283 | 241.9 | 6.68  | 61  | 100.8 | 102.1 | 98.4  | 99    | 103.5 | 96.2  |
| Q8CES0 | <i>Naa30</i>   | N-alpha-         | High   | 6  | 2  | 2  | 2  | 364  | 39.4  | 5.64  | 18  | 102.8 | 110.2 | 99    | 92.6  | 98.1  | 97.4  |
| P48318 | <i>Gad1</i>    | Glutamate        | High   | 30 | 14 | 24 | 13 | 593  | 66.6  | 7.17  | 412 | 102.8 | 107.6 | 89.5  | 101.9 | 100.4 | 97.9  |
| Q3ZK22 | <i>Vezt</i>    | Vezatin OS=Mus   | Medium | 2  | 1  | 1  | 1  | 780  | 87.9  | 5.2   | 14  | 102   | 110.3 | 104   | 91.3  | 95.6  | 96.8  |
| P01746 |                | Ig heavy chain V | High   | 10 | 1  | 1  | 1  | 140  | 15.5  | 8.4   | 26  |       |       |       |       |       |       |
| Q6PD26 | <i>Pigs</i>    | GPI              | High   | 6  | 2  | 3  | 2  | 555  | 61.7  | 6.93  | 82  | 116.3 | 96.1  | 118.2 | 87.9  | 91.8  | 89.7  |
| Q91VR8 | <i>Brk1</i>    | Protein BRICK1   | High   | 41 | 3  | 9  | 3  | 75   | 8.8   | 5.45  | 142 | 94.9  | 93.3  | 98.7  | 106.2 | 106.3 | 100.6 |
| Q9DC11 | <i>Plxdc2</i>  | Plexin domain-   | High   | 4  | 2  | 2  | 2  | 530  | 59.6  | 6.6   | 32  | 93.4  | 85.3  | 102.9 | 107.2 | 109.5 | 101.7 |
| Q8BIJ7 | <i>Rufy1</i>   | RUN and FYVE     | Medium | 2  | 2  | 2  | 1  | 712  | 80.3  | 5.68  | 17  |       |       |       |       |       |       |
| Q60760 | <i>Grb10</i>   | Growth factor    | Medium | 1  | 1  | 1  | 1  | 621  | 70.5  | 9.07  | 0   |       |       |       |       |       |       |
| Q9QUK3 | <i>Cln8</i>    | Protein CLN8     | High   | 6  | 1  | 1  | 1  | 288  | 33.1  | 8.82  | 26  | 95.6  | 88.1  | 112.5 | 102.6 | 94.6  | 106.5 |
| O35658 | <i>C1qbp</i>   | Complement       | High   | 25 | 5  | 14 | 5  | 278  | 31    | 4.92  | 171 | 93.4  | 100.9 | 97.3  | 103.6 | 102.9 | 101.8 |
| Q62083 | <i>Pick1</i>   | PRKCA-binding    | High   | 17 | 6  | 7  | 6  | 416  | 46.6  | 5.52  | 121 | 93    | 96.1  | 89.2  | 102.4 | 104.7 | 114.5 |
| Q91V57 | <i>Chn1</i>    | N-chimaerin      | High   | 19 | 6  | 7  | 6  | 459  | 53.2  | 6.76  | 86  | 97.1  | 95.9  | 99.1  | 97.9  | 106.4 | 103.6 |
| P62897 | <i>Cycs</i>    | Cytochrome c,    | High   | 70 | 9  | 34 | 9  | 105  | 11.6  | 9.58  | 587 | 95.7  | 96.5  | 79.7  | 102.7 | 111.7 | 113.7 |
| Q8BP47 | <i>NARS1</i>   | Asparagine--     | High   | 38 | 17 | 33 | 17 | 559  | 64.2  | 5.86  | 502 | 99.6  | 94.8  | 105.9 | 104.5 | 98.3  | 96.9  |
| Q6NSQ9 | <i>G6pc3</i>   | Glucose-6-       | High   | 5  | 1  | 1  | 1  | 346  | 38.8  | 8.13  | 70  |       |       |       |       |       |       |
| Q8BK62 | <i>Olfml3</i>  | Olfactomedin-    | Medium | 2  | 1  | 1  | 1  | 406  | 45.7  | 6.23  | 18  | 94.8  | 104.8 | 101.3 | 99.5  | 94.9  | 104.7 |
| Q9D6N5 | <i>Drap1</i>   | Dr1-associated   | High   | 5  | 1  | 1  | 1  | 205  | 22.3  | 5.26  | 39  | 105.1 | 89.9  | 105.4 | 98.8  | 100.2 | 100.6 |

|        |                 |                  |        |    |    |     |    |      |       |       |      |       |       |       |       |       |       |
|--------|-----------------|------------------|--------|----|----|-----|----|------|-------|-------|------|-------|-------|-------|-------|-------|-------|
| P58802 | <i>Tbc1d10a</i> | TBC1 domain      | High   | 8  | 3  | 3   | 3  | 500  | 56.2  | 7.85  | 29   | 95.2  | 103.7 | 94.9  | 94.1  | 106.1 | 105.9 |
| P61967 | <i>Ap1s1</i>    | AP-1 complex     | High   | 36 | 6  | 9   | 4  | 158  | 18.7  | 5.73  | 159  | 98.4  | 100.7 | 91.9  | 103.7 | 102.8 | 102.4 |
| Q69ZK9 | <i>Nlgn2</i>    | Neuroigin-2      | High   | 20 | 12 | 14  | 8  | 836  | 90.9  | 6.18  | 217  | 95.6  | 97.6  | 91.4  | 104.1 | 105.4 | 106.1 |
| Q9D7X3 | <i>Dusp3</i>    | Dual specificity | High   | 41 | 5  | 13  | 5  | 185  | 20.5  | 6.54  | 479  | 77.5  | 85.3  | 78.5  | 93.5  | 93.8  | 171.5 |
| Q9CPR7 | <i>Sike1</i>    | Suppressor of    | Medium | 9  | 1  | 1   | 1  | 207  | 23.5  | 5.38  | 18   | 92.4  | 75.3  | 78.4  | 120.4 | 92.9  | 140.5 |
| O35526 | <i>Stx1a</i>    | Syntaxin-1A      | High   | 67 | 18 | 60  | 15 | 288  | 33    | 5.24  | 1264 | 95.4  | 99.4  | 82.6  | 106.2 | 109.7 | 106.6 |
| P59823 | <i>Il1rapl1</i> | Interleukin-1    | High   | 6  | 5  | 5   | 5  | 695  | 79.6  | 6.32  | 22   | 97.5  | 97.6  | 94.8  | 110.3 | 100.9 | 98.9  |
| Q9EPL9 | <i>Acox3</i>    | Peroxisomal      | High   | 8  | 4  | 5   | 4  | 700  | 78.4  | 7.12  | 108  | 103.2 | 100.1 | 108.9 | 94.9  | 99.5  | 93.4  |
| P08207 | <i>S100a10</i>  | Protein S100-    | High   | 18 | 1  | 1   | 1  | 97   | 11.2  | 6.77  | 31   |       |       |       |       |       |       |
| Q8K245 | <i>Uvrag</i>    | UV radiation     | High   | 3  | 2  | 2   | 2  | 698  | 77.5  | 7.97  | 23   | 96.4  | 99    | 120.8 | 94.9  | 93.3  | 95.6  |
| P60755 | <i>Mdga2</i>    | MAM domain-      | High   | 2  | 2  | 2   | 2  | 949  | 106.6 | 7.02  | 28   | 110.4 | 83.3  | 83.2  | 105.8 | 115.9 | 101.4 |
| Q9ES97 | <i>Rtn3</i>     | Reticulon-3      | High   | 49 | 32 | 54  | 31 | 964  | 103.8 | 4.92  | 799  | 96.1  | 98.4  | 90.9  | 103.1 | 104.2 | 107.3 |
| Q5SQX6 | <i>Cyfp2</i>    | Cytoplasmic      | High   | 32 | 35 | 60  | 19 | 1253 | 145.6 | 7.05  | 1082 | 95.5  | 99    | 94    | 105.8 | 101.7 | 104.1 |
| P17710 | <i>Hk1</i>      | Hexokinase-1     | High   | 49 | 44 | 136 | 40 | 974  | 108.2 | 6.8   | 2889 | 95.9  | 100.1 | 93    | 103.9 | 105.1 | 102.1 |
| O89053 | <i>Coro1a</i>   | Coronin-1A       | High   | 44 | 19 | 39  | 18 | 461  | 51    | 6.48  | 492  | 98.5  | 98.1  | 97.1  | 102.5 | 102.1 | 101.8 |
| Q8C5L3 | <i>Cnot2</i>    | CCR4-NOT         | Medium | 3  | 2  | 2   | 2  | 540  | 59.7  | 7.66  | 0    | 99.9  | 88.6  | 104.8 | 101.7 | 102.9 | 102.1 |
| Q9CZB0 | <i>Sdhc</i>     | Succinate        | High   | 12 | 2  | 3   | 2  | 169  | 18.4  | 9.94  | 89   | 97.3  | 105.2 | 101.5 | 111.2 | 93.5  | 91.3  |
| Q9WTT4 | <i>Atp6v1g2</i> | V-type proton    | High   | 48 | 4  | 15  | 4  | 118  | 13.6  | 10.26 | 374  | 96.9  | 101.4 | 90.3  | 102.2 | 105   | 104.2 |
| Q99LL5 | <i>Pwp1</i>     | Periodic         | Low    | 2  | 1  | 1   | 1  | 501  | 55.6  | 4.82  | 14   | 95.9  | 99.1  | 93.8  | 101.7 | 96.5  | 113.1 |
| O88196 | <i>Ttc3</i>     | E3 ubiquitin-    | High   | 3  | 4  | 4   | 4  | 1979 | 223.8 | 6.25  | 72   | 94.2  | 93    | 91.3  | 104.9 | 110.9 | 105.7 |
| Q6PDY2 | <i>Ado</i>      | 2-               | High   | 29 | 6  | 8   | 6  | 256  | 28.4  | 5.97  | 54   | 95.1  | 101.5 | 90.9  | 102   | 104   | 106.5 |
| Q8BMG7 | <i>Rab3gap2</i> | Rab3 GTPase-     | High   | 23 | 24 | 31  | 24 | 1366 | 152.4 | 6.23  | 560  | 90.4  | 98.1  | 95.1  | 103.5 | 105.1 | 107.8 |
| Q0VE82 | <i>Cpne7</i>    | Copine-7         | High   | 8  | 3  | 5   | 2  | 557  | 61.9  | 5.4   | 60   | 96.9  | 97.3  | 98    | 94.8  | 105.9 | 107   |
| Q3UTH8 | <i>Arhgef9</i>  | Rho guanine      | High   | 13 | 6  | 8   | 5  | 516  | 60.9  | 5.64  | 132  | 98    | 98.9  | 93.5  | 108.2 | 103.4 | 98.1  |
| P29416 | <i>Hexa</i>     | Beta-            | High   | 15 | 6  | 8   | 6  | 528  | 60.6  | 6.54  | 125  | 110.4 | 103.3 | 115.9 | 92.2  | 87.6  | 90.7  |
| Q8BNW9 | <i>Kbtbd11</i>  | Kelch repeat and | High   | 27 | 11 | 15  | 11 | 633  | 67.9  | 5.39  | 277  | 94.4  | 102.1 | 95.4  | 103.2 | 100.8 | 104   |
| P35123 | <i>Usp4</i>     | Ubiquitin        | High   | 8  | 6  | 9   | 6  | 962  | 108.3 | 5.64  | 156  | 100.9 | 99.1  | 98.1  | 102.4 | 98.3  | 101.2 |
| Q6ZPQ6 | <i>Pitpnm2</i>  | Membrane-        | High   | 16 | 17 | 18  | 17 | 1335 | 147.9 | 7.93  | 248  | 98.2  | 100.8 | 90.2  | 105.4 | 104.2 | 101.2 |
| P01867 | <i>Igh-3</i>    | Ig gamma-2B      | High   | 27 | 6  | 16  | 6  | 404  | 44.2  | 6.52  | 273  | 138.3 | 79.5  | 187.5 | 64.1  | 61.4  | 69.3  |
| O54879 | <i>Hmgb3</i>    | High mobility    | High   | 20 | 3  | 3   | 3  | 200  | 23    | 8.37  | 39   | 103.2 | 94.4  | 93.5  | 101.1 | 105.7 | 102.2 |
| P18531 | <i>Ighv3-6</i>  | Ig heavy chain V | High   | 14 | 1  | 1   | 1  | 116  | 13.1  | 8.78  | 23   | 104.4 | 100.3 | 112.4 | 91.6  | 102   | 89.2  |
| Q61081 | <i>Cdc37</i>    | Hsp90 co-        | High   | 28 | 9  | 13  | 9  | 379  | 44.6  | 5.34  | 244  | 100   | 101.8 | 98.7  | 98    | 101.6 | 99.9  |
| Q8CGE9 | <i>Rgs12</i>    | Regulator of G-  | High   | 2  | 2  | 2   | 2  | 1381 | 149.5 | 7.59  | 39   |       |       |       |       |       |       |
| O70624 | <i>Myoc</i>     | Myocilin         | Low    | 1  | 1  | 1   | 1  | 490  | 55.3  | 5.6   | 0    | 97.6  | 94.1  | 87.1  | 110.3 | 105   | 105.9 |
| Q9EPR5 | <i>Sorcs2</i>   | VPS10 domain-    | High   | 6  | 6  | 8   | 6  | 1159 | 128.8 | 7.34  | 146  | 102   | 92.8  | 106.4 | 94.2  | 101.5 | 103   |
| P55144 | <i>Tyro3</i>    | Tyrosine-protein | High   | 9  | 5  | 5   | 5  | 880  | 96.1  | 5.92  | 113  | 87.7  | 97.7  | 86.1  | 110.7 | 109.1 | 108.6 |
| Q9D855 | <i>Uqcrb</i>    | Cytochrome b-c1  | High   | 53 | 8  | 19  | 8  | 111  | 13.5  | 9.11  | 276  | 98.9  | 105.8 | 95.1  | 102.8 | 100.4 | 97    |
| Q4VBD2 | <i>Tap1</i>     | Transmembrane    | High   | 12 | 7  | 7   | 7  | 564  | 63.9  | 8.22  | 36   | 95.1  | 103.3 | 91.5  | 104.3 | 107.1 | 98.8  |
| Q9CRC0 | <i>Vkorc1</i>   | Vitamin K        | Medium | 8  | 1  | 1   | 1  | 161  | 17.8  | 9.14  | 26   | 96.6  | 108.9 | 130.6 | 84.2  | 86.9  | 92.8  |
| Q91YM2 | <i>Arhgap35</i> | Rho GTPase-      | High   | 18 | 21 | 24  | 21 | 1499 | 170.3 | 6.61  | 391  | 97    | 98.6  | 95.1  | 103   | 100.6 | 105.6 |
| P63044 | <i>Vamp2</i>    | Vesicle-         | High   | 60 | 6  | 45  | 3  | 116  | 12.7  | 8.13  | 985  | 96.4  | 102.7 | 86.8  | 107.1 | 103.2 | 103.9 |
| Q3V3Q7 | <i>Pacs2</i>    | Phosphofurin     | High   | 4  | 3  | 3   | 2  | 862  | 94.9  | 6.51  | 29   | 96.7  | 109.1 | 100.1 | 99.5  | 94.8  | 99.8  |
| Q8BG67 | <i>Efr3a</i>    | Protein EFR3     | High   | 13 | 8  | 9   | 7  | 819  | 92.6  | 6.83  | 144  | 102.3 | 101.5 | 99.8  | 99.8  | 97.1  | 99.4  |
| Q921T2 | <i>Tor1aip1</i> | Torsin-1A-       | High   | 4  | 2  | 2   | 2  | 595  | 66.7  | 7.05  | 17   | 95.1  | 97.3  | 134.9 | 95.3  | 83    | 94.5  |
| Q8R4F1 | <i>Ntng2</i>    | Netrin-G2        | High   | 3  | 2  | 2   | 2  | 589  | 66.1  | 6.13  | 54   | 97.2  | 101.1 | 86.8  | 109.5 | 100.8 | 104.6 |
| Q8BVG4 | <i>Dpp9</i>     | Dipeptidyl       | High   | 6  | 4  | 8   | 3  | 862  | 97.9  | 6.65  | 144  | 102   | 100.6 | 98    | 99.2  | 100.2 | 100   |
| P0C6F1 | <i>Dnah2</i>    | Dynein heavy     | Low    | 0  | 1  | 1   | 1  | 4456 | 511.2 | 6.43  | 0    |       |       |       |       |       |       |
| Q8BV79 | <i>Trank1</i>   | TPR and ankyrin  | Low    | 0  | 1  | 1   | 1  | 2999 | 343.1 | 7.81  | 0    | 105.9 | 91    | 98.4  | 103   | 104.8 | 96.9  |
| O54734 | <i>Ddost</i>    | Dolichyl-        | High   | 20 | 8  | 11  | 8  | 441  | 49    | 5.83  | 161  | 103.8 | 102.4 | 108.1 | 94.5  | 96.3  | 94.9  |
| Q9CQW0 | <i>Emc6</i>     | ER membrane      | High   | 9  | 1  | 1   | 1  | 110  | 12    | 10.07 | 39   | 97.3  | 107.1 | 97.8  | 97.1  | 103.2 | 97.5  |
| P41105 | <i>Rpl28</i>    | 60S ribosomal    | High   | 38 | 7  | 11  | 7  | 137  | 15.7  | 12.02 | 205  | 105.4 | 99.4  | 107.2 | 93.7  | 97.7  | 96.6  |
| P12023 | <i>App</i>      | Amyloid-beta A4  | High   | 20 | 12 | 17  | 12 | 770  | 86.7  | 4.79  | 375  | 98.3  | 97.7  | 96.4  | 102.5 | 99.4  | 105.6 |
| Q61330 | <i>Cntn2</i>    | Contactin-2      | High   | 12 | 9  | 14  | 9  | 1040 | 113.1 | 7.62  | 273  | 103   | 113   | 95    | 100.3 | 93.6  | 95.2  |
| P60335 | <i>Pcbp1</i>    | Poly(rC)-binding | High   | 51 | 13 | 29  | 8  | 356  | 37.5  | 7.09  | 434  | 102   | 102.7 | 99.3  | 100.2 | 97.6  | 98.1  |
| P61222 | <i>Abce1</i>    | ATP-binding      | High   | 22 | 10 | 13  | 10 | 599  | 67.3  | 8.34  | 236  | 99.3  | 101.7 | 102.8 | 92.4  | 91.5  | 112.4 |
| Q6EDY6 | <i>Carmil1</i>  | F-actin-         | High   | 2  | 2  | 2   | 2  | 1374 | 151.8 | 7.8   | 32   | 97.7  | 102.4 | 95.4  | 97.6  | 96.4  | 110.6 |
| A2AQ19 | <i>Rtf1</i>     | RNA              | High   | 3  | 2  | 2   | 2  | 715  | 80.7  | 8.16  | 17   | 95.4  | 93.5  | 100.9 | 107.5 | 100.9 | 101.7 |
| Q9JHS9 | <i>Cwc15</i>    | Spliceosome-     | Medium | 5  | 1  | 1   | 1  | 229  | 26.6  | 5.71  | 0    |       |       |       |       |       |       |
| Q99MN1 | <i>Kars1</i>    | Lysine--tRNA     | High   | 33 | 20 | 25  | 20 | 595  | 67.8  | 5.94  | 296  | 102.8 | 102   | 108.1 | 95.3  | 96.8  | 95    |
| Q8BYM5 | <i>Nlgn3</i>    | Neuroigin-3      | High   | 18 | 11 | 17  | 10 | 825  | 91.1  | 5.8   | 358  | 97    | 93.6  | 92.6  | 108.1 | 104.9 | 103.8 |
| Q9JLJ2 | <i>Aldh9a1</i>  | 4-               | High   | 27 | 11 | 13  | 11 | 494  | 53.5  | 6.98  | 294  | 101.5 | 104.9 | 106.6 | 93.3  | 97.2  | 96.4  |
| Q91WS0 | <i>Cisd1</i>    | CDGSH iron-      | High   | 53 | 6  | 20  | 6  | 108  | 12.1  | 9.06  | 417  | 96.3  | 100.8 | 94.4  | 103.4 | 101.8 | 103.2 |
| Q6PDG5 | <i>Smarcc2</i>  | SWI/SNF          | High   | 10 | 10 | 12  | 10 | 1213 | 132.5 | 5.59  | 221  | 94    | 100.2 | 98.8  | 100   | 97.6  | 109.4 |
| A2AAE1 | <i>Kiaa1109</i> | Transmembrane    | High   | 1  | 4  | 4   | 4  | 5005 | 555   | 6.61  | 30   | 90.1  | 105.5 | 95.3  | 96.1  | 103.5 | 109.5 |
| Q8BMJ2 | <i>Lars1</i>    | Leucine--tRNA    | High   | 23 | 20 | 30  | 20 | 1178 | 134.1 | 7.05  | 641  | 99    | 96    | 97.9  | 101.8 | 100.6 | 104.8 |
| Q3TUH1 | <i>Tamm41</i>   | Phosphatidate    | High   | 3  | 1  | 2   | 1  | 337  | 37.8  | 8.98  | 65   | 104.8 | 100.4 | 99.9  | 102.1 | 95.7  | 97.1  |
| Q9ESB3 | <i>Hrg</i>      | Histidine-rich   | High   | 9  | 4  | 7   | 4  | 525  | 59.1  | 7.66  | 110  | 149.4 | 76.8  | 191.2 | 59.5  | 63.9  | 59.2  |
| A6H8H2 | <i>Dennd4c</i>  | DENN domain-     | High   | 1  | 1  | 1   | 1  | 1906 | 211.3 | 6.4   | 17   |       |       |       |       |       |       |

|        |                 |                   |        |    |    |     |    |      |       |       |      |       |       |       |       |       |       |
|--------|-----------------|-------------------|--------|----|----|-----|----|------|-------|-------|------|-------|-------|-------|-------|-------|-------|
| P47759 | <i>Nsg2</i>     | Neuronal vesicle  | High   | 29 | 2  | 2   | 2  | 171  | 19    | 9.39  | 27   | 106.7 | 97.1  | 93.4  | 97.5  | 106   | 99.3  |
| Q9CWX8 | <i>Snx2</i>     | Sorting nexin-2   | High   | 24 | 11 | 19  | 9  | 519  | 58.4  | 5.12  | 260  | 102.3 | 100.2 | 104.1 | 96.7  | 97.3  | 99.3  |
| Q921E2 | <i>Rab31</i>    | Ras-related       | High   | 43 | 7  | 13  | 5  | 194  | 21.3  | 7.4   | 350  | 103.5 | 103.2 | 107.8 | 95.4  | 91.7  | 98.5  |
| Q8BTW3 | <i>Exosc6</i>   | Exosome           | High   | 5  | 1  | 1   | 1  | 273  | 28.4  | 6.11  | 0    |       |       |       |       |       |       |
| Q8BG92 | <i>Clvs2</i>    | Clavesin-2        | High   | 14 | 4  | 5   | 2  | 327  | 37.9  | 6.2   | 84   | 94.5  | 97.2  | 92.9  | 98.2  | 102.6 | 114.6 |
| Q9CQ60 | <i>Pgls</i>     | 6-                | High   | 44 | 7  | 12  | 7  | 257  | 27.2  | 5.85  | 240  | 100.5 | 98.1  | 102.6 | 98.9  | 101.1 | 98.8  |
| Q9CS42 | <i>Prps2</i>    | Ribose-           | High   | 23 | 6  | 11  | 1  | 318  | 34.8  | 6.61  | 181  | 99.3  | 101.4 | 102.4 | 97.9  | 94.9  | 104.1 |
| Q61418 | <i>Clcn4</i>    | H(+)/Cl(-)        | High   | 2  | 2  | 2   | 2  | 747  | 83.7  | 6.86  | 52   | 97.3  | 101.9 | 87.6  | 105.6 | 99.8  | 107.8 |
| O89114 | <i>Dnajb5</i>   | DnaJ homolog      | High   | 7  | 2  | 2   | 2  | 348  | 39.1  | 9.04  | 18   | 94.7  | 105.2 | 88    | 102.3 | 104.7 | 105.2 |
| P97346 | <i>Nxn</i>      | Nucleoredoxin     | High   | 7  | 2  | 2   | 2  | 435  | 48.3  | 4.93  | 50   | 116   | 96.8  | 138.2 | 73    | 89.4  | 86.6  |
| Q99L85 | <i>Elp5</i>     | Elongator         | High   | 7  | 2  | 3   | 2  | 300  | 33.5  | 5.49  | 37   | 83.7  | 78    | 121.3 | 105.6 | 112.8 | 98.6  |
| P46096 | <i>Syt1</i>     | Synaptotagmin-1   | High   | 47 | 21 | 84  | 13 | 421  | 47.4  | 8.53  | 1375 | 95.6  | 99.4  | 84.8  | 107.1 | 108.7 | 104.3 |
| Q9CRB6 | <i>Tppp3</i>    | Tubulin           | High   | 52 | 10 | 15  | 10 | 176  | 19    | 9.11  | 267  | 101.8 | 110.5 | 105.4 | 92.9  | 94.6  | 94.8  |
| Q61672 | <i>Slc29a2</i>  | Equilibrative     | High   | 3  | 1  | 1   | 1  | 456  | 50.2  | 6.51  | 41   | 95    | 82    | 95    | 105.4 | 108.7 | 114   |
| P53657 | <i>Pklr</i>     | Pyruvate kinase   | High   | 6  | 2  | 9   | 1  | 574  | 62.3  | 7.09  | 167  |       |       |       |       |       |       |
| Q9QZN4 | <i>Fbxo6</i>    | F-box only        | High   | 3  | 1  | 1   | 1  | 295  | 34.5  | 8.18  | 34   | 95.6  | 98.5  | 106.9 | 115.3 | 89.2  | 94.5  |
| Q8C1A5 | <i>Thop1</i>    | Thimet            | High   | 35 | 22 | 31  | 22 | 687  | 78    | 6.06  | 587  | 96.4  | 96    | 98    | 100.2 | 107   | 102.5 |
| Q91W61 | <i>Fbxl15</i>   | F-box/LRR-        | Low    | 4  | 1  | 1   | 1  | 300  | 33.1  | 7.43  | 0    | 90.5  | 108.9 | 98.2  | 88.8  | 98.1  | 115.5 |
| Q923D5 | <i>Wbp11</i>    | VW domain-        | High   | 8  | 5  | 6   | 5  | 641  | 69.8  | 8.4   | 64   | 98.6  | 100.5 | 94.3  | 109.6 | 93.7  | 103.3 |
| A2ALK8 | <i>Ptpn3</i>    | Tyrosine-protein  | High   | 3  | 2  | 2   | 2  | 913  | 103.8 | 7.2   | 20   |       |       |       |       |       |       |
| P08730 | <i>Krt13</i>    | Keratin, type I   | High   | 6  | 3  | 3   | 2  | 437  | 47.7  | 4.86  | 44   | 71.4  | 114.3 | 77.9  | 161.4 | 75.2  | 99.9  |
| P63280 | <i>Ube2i</i>    | SUMO-             | High   | 39 | 7  | 9   | 7  | 158  | 18    | 8.66  | 69   | 100.8 | 102.4 | 106.2 | 98.3  | 94.8  | 97.5  |
| Q99JW2 | <i>Acy1</i>     | Aminoacylase-1    | High   | 20 | 8  | 8   | 8  | 408  | 45.8  | 6.32  | 64   | 99.2  | 107.9 | 96.4  | 95.4  | 100.1 | 100.9 |
| O08759 | <i>Ube3a</i>    | Ubiquitin-protein | High   | 16 | 12 | 14  | 12 | 870  | 99.8  | 5.08  | 311  | 94.6  | 93.5  | 94.4  | 106.2 | 101.3 | 109.9 |
| Q3U308 | <i>Ctu2</i>     | Cytoplasmic       | High   | 4  | 1  | 1   | 1  | 514  | 56.1  | 7.08  | 21   |       |       |       |       |       |       |
| P42128 | <i>Foxk1</i>    | Forkhead box      | High   | 3  | 1  | 1   | 1  | 719  | 74.9  | 9.17  | 0    | 101.3 | 91.7  | 92.7  | 102.2 | 112.2 | 99.8  |
| P61982 | <i>Ywhag</i>    | 14-3-3 protein    | High   | 67 | 15 | 118 | 10 | 247  | 28.3  | 4.89  | 2131 | 94.9  | 98.2  | 90.8  | 103.8 | 107.9 | 104.5 |
| Q9D379 | <i>Ephx1</i>    | Epoxide           | High   | 20 | 8  | 8   | 8  | 455  | 52.5  | 8.35  | 89   | 104.4 | 102.4 | 118.9 | 87.2  | 92.6  | 94.5  |
| P97363 | <i>Sptlc2</i>   | Serine            | High   | 7  | 2  | 2   | 2  | 560  | 62.9  | 8.18  | 18   | 103.6 | 101.2 | 114.1 | 88.2  | 88.2  | 104.7 |
| Q3UM29 | <i>Cog7</i>     | Conserved         | High   | 3  | 2  | 2   | 2  | 770  | 86    | 5.38  | 32   | 101.9 | 102.5 | 107.3 | 95.7  | 95.2  | 97.4  |
| P97467 | <i>Pam</i>      | Peptidyl-glycine  | High   | 5  | 4  | 4   | 4  | 979  | 108.9 | 6.55  | 59   | 103   | 94.7  | 108   | 88.3  | 100.1 | 105.9 |
| P60191 | <i>Rims4</i>    | Regulating        | High   | 7  | 1  | 2   | 1  | 269  | 29.3  | 5.8   | 33   | 105   | 97    | 100.4 | 101.6 | 96    | 100.2 |
| Q9WV55 | <i>Vapa</i>     | Vesicle-          | High   | 43 | 12 | 33  | 11 | 249  | 27.8  | 8.4   | 510  | 97.2  | 101   | 93.9  | 103.1 | 103.9 | 100.8 |
| Q9D1R1 | <i>Tmem126b</i> | Complex I         | High   | 10 | 2  | 2   | 2  | 230  | 25.4  | 9.51  | 59   | 104.5 | 101.2 | 99.1  | 99.2  | 94.3  | 101.7 |
| Q8CC88 | <i>Vwa8</i>     | von Willebrand    | High   | 13 | 21 | 26  | 21 | 1905 | 213.3 | 6.6   | 266  | 96.9  | 103.3 | 96.7  | 101.8 | 101.8 | 99.4  |
| Q05AA6 | <i>Drp2</i>     | Dystrophin-       | High   | 3  | 2  | 2   | 2  | 957  | 108   | 6.25  | 28   | 96.3  | 110.8 | 89.9  | 104.6 | 87    | 111.4 |
| Q60700 | <i>Map3k12</i>  | Mitogen-          | High   | 2  | 1  | 1   | 1  | 888  | 96    | 6.24  | 31   |       |       |       |       |       |       |
| P51863 | <i>Atp6v0d1</i> | V-type proton     | High   | 45 | 13 | 39  | 13 | 351  | 40.3  | 5     | 836  | 97.5  | 98.4  | 94.6  | 104.7 | 104.6 | 100.2 |
| P63089 | <i>Ptn</i>      | Pleiotrophin      | High   | 25 | 4  | 5   | 4  | 168  | 18.9  | 9.6   | 66   | 96.5  | 105.3 | 104.2 | 103.4 | 90.6  | 100.1 |
| Q9QYF9 | <i>Ndr3</i>     | Protein NDRG3     | High   | 22 | 6  | 12  | 6  | 375  | 41.5  | 5.25  | 92   | 94.2  | 93.5  | 84.2  | 102.2 | 107.5 | 118.5 |
| Q9CXY6 | <i>Ilf2</i>     | Interleukin       | High   | 43 | 13 | 21  | 13 | 390  | 43    | 5.26  | 409  | 99.2  | 98.7  | 94.8  | 104.2 | 104   | 99.2  |
| Q8K449 | <i>Abca9</i>    | ATP-binding       | Low    | 0  | 1  | 1   | 1  | 1623 | 183   | 6.93  | 0    |       |       |       |       |       |       |
| Q9CY10 |                 | Protein Njmu-R1   | High   | 11 | 4  | 5   | 4  | 393  | 44.4  | 5.05  | 58   | 97.3  | 100.5 | 92.4  | 105.9 | 101   | 102.9 |
| P56942 | <i>Pmch</i>     | Pro-MCH           | High   | 7  | 1  | 1   | 1  | 165  | 18.5  | 7.14  | 24   |       |       |       |       |       |       |
| P24472 | <i>Gsta4</i>    | Glutathione S-    | High   | 18 | 4  | 5   | 4  | 222  | 25.5  | 7.39  | 43   | 93.3  | 92    | 91.2  | 90.8  | 96.6  | 136.1 |
| Q9Z2M7 | <i>Pmm2</i>     | Phosphomanno      | High   | 31 | 7  | 10  | 7  | 242  | 27.6  | 6.42  | 153  | 98.7  | 106.5 | 91.6  | 103   | 99.4  | 100.8 |
| Q8BLK3 | <i>Lsamp</i>    | Limbic system-    | High   | 41 | 12 | 33  | 12 | 341  | 38.1  | 6.65  | 686  | 94.8  | 93.4  | 100.3 | 99.9  | 102.8 | 108.8 |
| O55026 | <i>Entpd2</i>   | Ectonucleoside    | High   | 8  | 3  | 4   | 3  | 495  | 54.3  | 8.37  | 108  | 93.1  | 95.5  | 100.4 | 108.5 | 97.2  | 105.4 |
| P97792 | <i>Cxadr</i>    | Coxsackievirus    | High   | 14 | 5  | 7   | 5  | 365  | 39.9  | 6.96  | 105  | 87.5  | 78.8  | 81.2  | 114.7 | 119.1 | 118.8 |
| Q9CYH2 | <i>Prxl2a</i>   | Peroxiredoxin-    | High   | 34 | 8  | 16  | 8  | 218  | 24.4  | 9.17  | 365  | 96    | 95.4  | 101.6 | 98.7  | 105.3 | 102.9 |
| O55125 | <i>Nipsnap1</i> | Protein NipSnap   | High   | 36 | 9  | 14  | 9  | 284  | 33.3  | 9.44  | 145  | 99.5  | 104.6 | 94.1  | 105.2 | 102.3 | 94.4  |
| Q8CI19 | <i>Pdgfc</i>    | Platelet-derived  | Medium | 5  | 1  | 1   | 1  | 345  | 38.7  | 7.17  | 19   |       |       |       |       |       |       |
| Q6R891 | <i>Ppp1r9b</i>  | Neurabin-2        | High   | 27 | 15 | 24  | 15 | 817  | 89.5  | 4.92  | 450  | 96.9  | 97.5  | 98.1  | 101.9 | 100.5 | 105.1 |
| Q9D1E8 | <i>Agpat5</i>   | 1-acyl-sn-        | High   | 10 | 3  | 3   | 3  | 365  | 42.2  | 9.38  | 22   | 90.7  | 104.9 | 91.4  | 108.2 | 101.5 | 103.4 |
| Q60987 | <i>Foxg1</i>    | Forkhead box      | Medium | 1  | 1  | 1   | 1  | 481  | 51.6  | 8.87  | 23   | 99.3  | 98.9  | 95.5  | 97.4  | 100.1 | 108.8 |
| P84096 | <i>Rhog</i>     | Rho-related       | High   | 46 | 7  | 15  | 6  | 191  | 21.3  | 8.12  | 244  | 108.1 | 116.3 | 114.8 | 90.5  | 84.4  | 85.8  |
| Q9CWL8 | <i>Ctnnb1</i>   | Beta-catenin-like | High   | 7  | 4  | 4   | 4  | 563  | 64.9  | 5.07  | 61   | 99.6  | 97    | 102.2 | 96    | 92.7  | 112.5 |
| Q8BUR9 | <i>Mzt1</i>     | Mitotic-spindle   | High   | 21 | 1  | 1   | 1  | 78   | 8.1   | 4.78  | 45   | 89.2  | 89.7  | 105.8 | 102.6 | 109.1 | 103.7 |
| A7XUY5 | <i>Skint5</i>   | Selection and     | Low    | 1  | 1  | 1   | 1  | 1461 | 165.8 | 8.16  | 0    |       |       |       |       |       |       |
| Q9R069 | <i>Bcam</i>     | Basal cell        | High   | 15 | 6  | 6   | 6  | 622  | 67.6  | 6.25  | 110  | 99.4  | 104.6 | 99.7  | 99.7  | 98.6  | 98    |
| P50153 | <i>Gng4</i>     | Guanine           | High   | 53 | 3  | 5   | 3  | 75   | 8.4   | 7.08  | 170  | 93.8  | 91.7  | 92.4  | 99.3  | 115.7 | 107.1 |
| Q8VD75 | <i>Hip1</i>     | Huntingtin-       | High   | 17 | 13 | 13  | 12 | 1029 | 115.1 | 5.43  | 295  | 95    | 104.9 | 102.4 | 100   | 96.3  | 101.3 |
| P61028 | <i>Rab8b</i>    | Ras-related       | High   | 49 | 10 | 32  | 3  | 207  | 23.6  | 9.07  | 668  | 100.4 | 98.8  | 94.3  | 101.2 | 96.6  | 108.6 |
| Q921Q7 | <i>Rin1</i>     | Ras and Rab       | High   | 10 | 6  | 7   | 6  | 763  | 83    | 8.72  | 69   | 97    | 92.7  | 101.1 | 101   | 103   | 105.2 |
| Q9ERD7 | <i>Tubb3</i>    | Tubulin beta-3    | High   | 63 | 22 | 279 | 7  | 450  | 50.4  | 4.93  | 5552 | 96.4  | 103   | 86.5  | 106.7 | 102.6 | 104.8 |
| Q9WV02 | <i>Rbmx</i>     | RNA-binding       | High   | 31 | 13 | 23  | 1  | 391  | 42.3  | 10.05 | 254  | 81.5  | 90.8  | 113.5 | 118.8 | 101.1 | 94.2  |
| Q61234 | <i>Snta1</i>    | Alpha-1-          | High   | 17 | 8  | 9   | 8  | 503  | 53.6  | 6.86  | 70   | 98    | 103.7 | 97.8  | 102.8 | 98.6  | 99.2  |
| P61804 | <i>Dad1</i>     | Dolichyl-         | High   | 28 | 3  | 4   | 3  | 113  | 12.5  | 7.08  | 102  | 102.4 | 107.5 | 107.8 | 93.5  | 91.8  | 96.9  |

|        |                 |                    |        |    |    |    |    |      |       |       |      |       |       |       |       |       |       |
|--------|-----------------|--------------------|--------|----|----|----|----|------|-------|-------|------|-------|-------|-------|-------|-------|-------|
| Q8BH57 | <i>Wdr48</i>    | WD repeat-         | High   | 13 | 7  | 8  | 7  | 676  | 76    | 7.17  | 79   | 116   | 94.5  | 115   | 89.2  | 94.6  | 90.7  |
| Q91YN9 | <i>Bag2</i>     | BAG family         | High   | 5  | 1  | 2  | 1  | 210  | 23.5  | 6.42  | 55   | 92.6  | 95.6  | 98.7  | 101.8 | 100.8 | 110.4 |
| P03899 | <i>Mtnr3</i>    | NADH-              | High   | 13 | 1  | 1  | 1  | 115  | 13.2  | 4.64  | 47   | 91.4  | 110   | 105.2 | 99.3  | 92.7  | 101.3 |
| Q9QUR7 | <i>Pin1</i>     | Peptidyl-prolyl    | High   | 47 | 6  | 7  | 6  | 165  | 18.4  | 8.79  | 128  | 92    | 98.3  | 89.2  | 109.4 | 103.3 | 107.8 |
| Q6PEE3 | <i>Rrm2b</i>    | Ribonucleoside-    | Medium | 2  | 1  | 1  | 1  | 351  | 40.8  | 5.01  | 17   | 97.1  | 101.7 | 101.3 | 98.8  | 101.1 | 100   |
| P59108 | <i>Cpne2</i>    | Copine-2           | High   | 4  | 2  | 4  | 1  | 548  | 61    | 5.96  | 45   | 102.3 | 93.8  | 113.9 | 102.9 | 85.3  | 101.9 |
| P08226 | <i>ApoE</i>     | Apolipoprotein E   | High   | 48 | 15 | 26 | 15 | 311  | 35.8  | 5.68  | 389  | 133.1 | 92.4  | 144.9 | 79.3  | 77.3  | 73    |
| Q61070 | <i>Ei24</i>     | Etoposide-         | Low    | 2  | 1  | 1  | 1  | 340  | 38.9  | 9.72  | 0    | 93.2  | 94.4  | 89.3  | 100.5 | 98.9  | 123.7 |
| P33175 | <i>Kif5a</i>    | Kinesin heavy      | High   | 14 | 12 | 19 | 2  | 1027 | 116.9 | 5.94  | 344  | 95.9  | 99.3  | 88.9  | 99.1  | 103.7 | 113.1 |
| P62073 | <i>Timm10</i>   | Mitochondrial      | High   | 51 | 4  | 7  | 4  | 90   | 10.3  | 6.29  | 217  | 89.8  | 95.6  | 88.6  | 118.7 | 96.8  | 110.5 |
| P47740 | <i>Aldh3a2</i>  | Aldehyde           | High   | 26 | 11 | 12 | 11 | 484  | 53.9  | 8.35  | 216  | 105.6 | 99.5  | 112.7 | 92    | 97.3  | 92.8  |
| Q5FWH7 | <i>Slc39a12</i> | Zinc transporter   | High   | 1  | 1  | 2  | 1  | 689  | 76.2  | 5.77  | 44   | 87.5  | 99.8  | 80.8  | 110.5 | 118.3 | 103.1 |
| P41216 | <i>Acs11</i>    | Long-chain-fatty-  | High   | 30 | 17 | 23 | 15 | 699  | 77.9  | 7.15  | 330  | 96.9  | 103.5 | 95    | 103.1 | 100.9 | 100.6 |
| Q3V0G7 | <i>Gam13</i>    | GTPase-            | High   | 4  | 2  | 2  | 2  | 1038 | 115.4 | 7.17  | 66   | 93.2  | 99.8  | 92.1  | 101.3 | 109.2 | 104.5 |
| Q07235 | <i>Serpine2</i> | Glia-derived       | High   | 9  | 3  | 4  | 3  | 397  | 44.2  | 9.85  | 95   | 98.5  | 102.4 | 98.8  | 100.8 | 101   | 98.6  |
| B1AVZ0 | <i>Uprt</i>     | Uracil             | High   | 6  | 2  | 2  | 2  | 310  | 34.3  | 6.23  | 19   | 93.6  | 100   | 97    | 103.9 | 100.8 | 104.6 |
| Q8R3B7 | <i>Brd8</i>     | Bromodomain-       | Low    | 1  | 1  | 1  | 1  | 951  | 102.5 | 4.72  | 0    | 97.4  | 87.1  | 95.1  | 108   | 107.6 | 104.9 |
| Q99J36 | <i>Thumpd1</i>  | THUMP domain-      | High   | 19 | 6  | 8  | 6  | 350  | 38.9  | 6.07  | 125  | 100.7 | 92.5  | 101.3 | 99.3  | 101.5 | 104.6 |
| Q9JJN6 | <i>Ctnnbip1</i> | Beta-catenin-      | Medium | 17 | 1  | 1  | 1  | 81   | 9.2   | 5.41  | 0    |       |       |       |       |       |       |
| Q91VH6 | <i>Memo1</i>    | Protein MEMO1      | High   | 9  | 2  | 3  | 2  | 297  | 33.7  | 7.14  | 0    | 102.5 | 100.6 | 103.8 | 97.4  | 100.3 | 95.3  |
| P54923 | <i>Adprh</i>    | [Protein ADP-      | High   | 15 | 5  | 6  | 5  | 362  | 40    | 5.76  | 113  | 102.2 | 99.5  | 104.6 | 98.2  | 103.3 | 92.3  |
| Q9CWG9 | <i>Bloc1s2</i>  | Biogenesis of      | Medium | 5  | 1  | 1  | 1  | 143  | 16.3  | 4.88  | 18   | 108.2 | 105.2 | 99.7  | 89.9  | 101.4 | 95.7  |
| A2ARP1 | <i>Ppip5k1</i>  | Inositol           | High   | 3  | 3  | 3  | 2  | 1436 | 159.8 | 5.39  | 47   | 95.6  | 107.4 | 97.7  | 100.6 | 100.4 | 98.2  |
| P56565 | <i>S100a1</i>   | Protein S100-A1    | High   | 23 | 2  | 5  | 2  | 94   | 10.5  | 4.5   | 194  | 110.9 | 109.2 | 108.6 | 92.8  | 90.5  | 88    |
| Q9CXD6 | <i>Mcur1</i>    | Mitochondrial      | High   | 8  | 3  | 3  | 3  | 340  | 37.8  | 10.2  | 28   |       |       |       |       |       |       |
| P40142 | <i>Tkt</i>      | Transketolase      | High   | 57 | 29 | 69 | 29 | 623  | 67.6  | 7.5   | 1229 | 103.7 | 108   | 102.8 | 95.8  | 93.8  | 95.9  |
| Q9QX11 | <i>Cyth1</i>    | Cytohesin-1        | High   | 24 | 7  | 8  | 4  | 398  | 46.2  | 5.63  | 73   | 100.2 | 100.1 | 96.8  | 96.5  | 101.4 | 105   |
| Q9WU78 | <i>Pdcd6ip</i>  | Programmed cell    | High   | 39 | 30 | 38 | 30 | 869  | 96    | 6.52  | 545  | 100.2 | 102   | 100.2 | 98.9  | 99.5  | 99.1  |
| Q99KR3 | <i>Lactb2</i>   | Endoribonucleas    | High   | 9  | 2  | 2  | 2  | 288  | 32.7  | 6.33  | 36   | 106   | 98.1  | 109.1 | 98.5  | 89.3  | 99    |
| Q923B6 | <i>Steap4</i>   | Metalloreductase   | High   | 3  | 1  | 1  | 1  | 470  | 53    | 9.17  | 29   | 120.6 | 109.3 | 120   | 80.1  | 82.9  | 87.1  |
| Q6KAU4 | <i>Mvb12b</i>   | Multivesicular     | High   | 7  | 1  | 1  | 1  | 317  | 35.4  | 7.93  | 57   | 98.7  | 105.4 | 93.4  | 95.2  | 93    | 114.3 |
| Q3ZT31 | <i>Snx25</i>    | Sorting nexin-25   | High   | 4  | 3  | 3  | 3  | 840  | 97.1  | 6.29  | 35   | 91.3  | 100.3 | 96.2  | 100   | 105.6 | 106.6 |
| Q35326 | <i>Srsf5</i>    | Serine/arginine-   | High   | 19 | 4  | 6  | 4  | 269  | 30.9  | 11.56 | 90   | 100.9 | 98.1  | 101.1 | 105.3 | 96.2  | 98.4  |
| Q9EP53 | <i>Tsc1</i>     | Hamartin           | High   | 2  | 2  | 2  | 2  | 1161 | 128.7 | 6.37  | 63   | 90.4  | 99.4  | 84.5  | 102.7 | 106.3 | 116.7 |
| Q3UZV7 | <i>Elapor2</i>  | Endosome/lysos     | Low    | 1  | 1  | 1  | 1  | 1028 | 113.6 | 6.14  | 18   |       |       |       |       |       |       |
| D3YWQ0 | <i>Dgki</i>     | Diacylglycerol     | High   | 9  | 7  | 10 | 5  | 1071 | 118.1 | 7.91  | 161  | 89.8  | 101.5 | 99.9  | 97.8  | 100.3 | 110.7 |
| Q91WC0 | <i>Setd3</i>    | Actin-histidine N- | High   | 13 | 7  | 10 | 7  | 594  | 67.1  | 5.6   | 154  | 101   | 95.9  | 96.9  | 98    | 103.1 | 105.1 |
| Q88746 | <i>Tom1</i>     | Target of Myb      | High   | 15 | 5  | 9  | 5  | 492  | 54.3  | 4.94  | 163  | 92.3  | 103.6 | 91.8  | 102.7 | 103.8 | 106   |
| Q60714 | <i>Slc27a1</i>  | Long-chain fatty   | High   | 14 | 6  | 7  | 6  | 646  | 71.2  | 8.38  | 119  | 98.2  | 102.6 | 95.7  | 101.4 | 100.1 | 102   |
| Q8BGU2 | <i>Cbln2</i>    | Cerebellin-2       | Medium | 3  | 1  | 1  | 1  | 224  | 24    | 8.18  | 21   | 90.9  | 103.5 | 75.5  | 118.1 | 106.9 | 105.1 |
| Q9CXW4 | <i>Rpl11</i>    | 60S ribosomal      | High   | 21 | 4  | 13 | 4  | 178  | 20.2  | 9.6   | 175  | 106.4 | 102.7 | 106.8 | 95.7  | 94.4  | 94    |
| P62267 | <i>Rps23</i>    | 40S ribosomal      | High   | 40 | 4  | 6  | 4  | 143  | 15.8  | 10.49 | 119  | 104.4 | 101.5 | 105   | 102.7 | 93.2  | 93.2  |
| Q8R2Y0 | <i>Abhd6</i>    | Monoacylglycero    | High   | 22 | 7  | 9  | 7  | 336  | 38.2  | 8.47  | 185  | 106.1 | 95.4  | 111.1 | 96    | 96.8  | 94.7  |
| P42208 | <i>Septin2</i>  | Septin-2           | High   | 45 | 11 | 20 | 11 | 361  | 41.5  | 6.55  | 369  | 102.2 | 100   | 109.1 | 95.2  | 96.9  | 96.6  |
| Q9JJG6 | <i>Tmem47</i>   | Transmembrane      | High   | 10 | 2  | 2  | 2  | 181  | 20    | 6.73  | 62   | 107.1 | 100   | 113.1 | 88.2  | 92.3  | 99.2  |
| P09242 | <i>Alpl</i>     | Alkaline           | High   | 2  | 1  | 1  | 1  | 524  | 57.5  | 7.01  | 48   | 90.7  | 90.8  | 92.7  | 104.6 | 108.1 | 113   |
| P63085 | <i>Mapk1</i>    | Mitogen-           | High   | 56 | 17 | 38 | 13 | 358  | 41.2  | 6.98  | 651  | 103.5 | 96.9  | 106.5 | 96.4  | 100   | 96.8  |
| P17742 | <i>Ppia</i>     | Peptidyl-prolyl    | High   | 74 | 13 | 91 | 13 | 164  | 18    | 7.9   | 1626 | 95.6  | 97    | 93    | 103   | 106.2 | 105.3 |
| Q9QZ18 | <i>Serinc1</i>  | Serine             | High   | 8  | 3  | 3  | 3  | 453  | 50.5  | 6.28  | 23   | 104.1 | 107.7 | 102.2 | 101.1 | 94.3  | 90.6  |
| Q9D8L5 | <i>Ccdc91</i>   | Coiled-coil        | High   | 6  | 3  | 3  | 3  | 442  | 50    | 5.07  | 52   | 98.4  | 105.4 | 98.6  | 96.5  | 101.9 | 99.2  |
| Q91YP2 | <i>Nln</i>      | Neurolysin,        | High   | 18 | 11 | 13 | 11 | 704  | 80.4  | 6.44  | 190  | 99.5  | 92.2  | 106.1 | 98.1  | 99.1  | 105.1 |
| Q8VCN5 | <i>Cth</i>      | Cystathionine      | High   | 3  | 1  | 1  | 1  | 398  | 43.5  | 7.65  | 39   | 96.2  | 103   | 96.5  | 88.5  | 106.6 | 109.2 |
| Q9D3A9 | <i>Ttyh1</i>    | Protein tweety     | High   | 9  | 3  | 4  | 3  | 450  | 49    | 5.03  | 125  | 83.5  | 98    | 76.3  | 111.4 | 116.9 | 113.8 |
| Q7TQH0 | <i>Atxn2l</i>   | Ataxin-2-like      | High   | 11 | 11 | 12 | 10 | 1049 | 110.6 | 8.85  | 138  | 90.9  | 92.5  | 96.1  | 104.6 | 110.4 | 105.5 |
| Q06185 | <i>Atp5me</i>   | ATP synthase       | High   | 52 | 4  | 23 | 4  | 71   | 8.2   | 9.35  | 489  | 96.3  | 104.9 | 93.2  | 103.4 | 103.1 | 99.2  |
| Q99L27 | <i>Gmpr2</i>    | GMP reductase      | High   | 13 | 5  | 5  | 3  | 348  | 38    | 7.44  | 47   | 101.1 | 107   | 93.7  | 94.9  | 94.6  | 108.6 |
| P80560 | <i>Ptprn2</i>   | Receptor-type      | High   | 11 | 9  | 11 | 9  | 1001 | 111.4 | 5.95  | 268  | 96.7  | 96    | 98.4  | 97    | 104.8 | 107.1 |
| Q9QYJ3 | <i>Dnajb1</i>   | DnaJ homolog       | High   | 28 | 9  | 12 | 8  | 340  | 38.1  | 8.63  | 290  | 93.3  | 101.7 | 93.2  | 103.1 | 102.3 | 106.4 |
| P15327 | <i>Bpgm</i>     | Bisphosphoglyce    | High   | 14 | 3  | 3  | 3  | 259  | 30    | 7.06  | 41   | 97.8  | 107.1 | 97.2  | 96.4  | 97.3  | 104.2 |
| P36916 | <i>Gnl1</i>     | Guanine            | High   | 19 | 10 | 15 | 10 | 607  | 68.7  | 5.68  | 154  | 93.9  | 97.3  | 96.5  | 106.1 | 101.9 | 104.4 |
| P54823 | <i>Ddx6</i>     | Probable ATP-      | High   | 27 | 10 | 11 | 10 | 483  | 54.2  | 8.66  | 194  | 96.7  | 98.7  | 96    | 103.5 | 103.6 | 101.4 |
| P08607 | <i>C4bpa</i>    | C4b-binding        | Medium | 3  | 1  | 1  | 1  | 469  | 51.5  | 7.15  | 17   |       |       |       |       |       |       |
| O55022 | <i>Pgrmc1</i>   | Membrane-          | High   | 42 | 9  | 14 | 8  | 195  | 21.7  | 4.7   | 181  | 98.1  | 97.4  | 95.1  | 98.2  | 106.1 | 105.2 |
| P19253 | <i>Rpl13a</i>   | 60S ribosomal      | High   | 33 | 7  | 15 | 7  | 203  | 23.4  | 11.02 | 230  | 106.5 | 102.3 | 104.5 | 95.5  | 95.6  | 95.7  |
| O09061 | <i>Psmb1</i>    | Proteasome         | High   | 36 | 8  | 15 | 8  | 240  | 26.4  | 7.81  | 226  | 99.2  | 95.4  | 96.8  | 101   | 100.7 | 106.9 |
| Q6PAV2 | <i>Herc4</i>    | Probable E3        | High   | 7  | 6  | 7  | 6  | 1057 | 118.3 | 6.29  | 89   | 94.5  | 99.8  | 92.2  | 98.6  | 109.3 | 105.6 |
| Q9Z1P8 | <i>Angptl4</i>  | Angiopietin-       | Medium | 8  | 1  | 1  | 1  | 410  | 45.5  | 8.13  | 0    |       |       |       |       |       |       |
| Q80Y81 | <i>Elac2</i>    | Zinc               | High   | 8  | 5  | 5  | 5  | 831  | 92.7  | 7.34  | 44   |       |       |       |       |       |       |

|        |                 |                   |        |    |    |     |    |      |       |       |      |       |       |       |       |       |       |
|--------|-----------------|-------------------|--------|----|----|-----|----|------|-------|-------|------|-------|-------|-------|-------|-------|-------|
| Q8BGZ1 | <i>Hpcal4</i>   | Hippocalcin-like  | High   | 77 | 11 | 42  | 8  | 191  | 22.2  | 4.89  | 855  | 96.4  | 98    | 97.4  | 101.9 | 104.2 | 102.1 |
| Q9Z2A7 | <i>Dgat1</i>    | Diacylglycerol O- | Medium | 5  | 1  | 1   | 1  | 498  | 56.8  | 9.39  | 17   | 94.2  | 99.4  | 117.1 | 93.8  | 104.7 | 90.7  |
| Q9D1F4 | <i>Akt1s1</i>   | Proline-rich      | High   | 5  | 1  | 1   | 1  | 257  | 27.5  | 4.72  | 48   | 91.6  | 103.9 | 105.7 | 88.5  | 102.2 | 108   |
| Q8BFP9 | <i>Pdk1</i>     | [Pyruvate         | High   | 23 | 8  | 12  | 7  | 434  | 49    | 8.19  | 198  | 106.9 | 97.4  | 111.4 | 98    | 96.8  | 89.5  |
| Q99NH0 | <i>Ankrd17</i>  | Ankyrin repeat    | High   | 3  | 5  | 5   | 5  | 2603 | 274   | 6.52  | 97   | 102.7 | 100.6 | 115.6 | 100.7 | 92.3  | 88.1  |
| Q14B62 | <i>ptchd1</i>   | Patched domain-   | Low    | 2  | 1  | 1   | 1  | 888  | 101.4 | 8.15  | 0    | 101.8 | 107.9 | 94.5  | 100.1 | 98.3  | 97.4  |
| Q9CZR3 | <i>Tomm40l</i>  | Mitochondrial     | High   | 20 | 6  | 6   | 6  | 308  | 34    | 7.27  | 89   | 97.7  | 103.3 | 97.4  | 103.6 | 94.9  | 103   |
| Q9QZ19 | <i>Serinc3</i>  | Serine            | Medium | 1  | 1  | 1   | 1  | 472  | 52.6  | 7.23  | 23   | 94.1  | 112.1 | 100.2 | 107.4 | 94.1  | 92.1  |
| Q9DC61 | <i>Pmpca</i>    | Mitochondrial-    | High   | 22 | 8  | 8   | 8  | 524  | 58.2  | 6.83  | 167  | 101.2 | 104.6 | 95.1  | 102.9 | 96.9  | 99.2  |
| Q8BGW1 | <i>Fto</i>      | Alpha-            | High   | 13 | 5  | 5   | 5  | 502  | 58    | 5.12  | 110  | 98.5  | 99    | 101.3 | 105.6 | 97.1  | 98.5  |
| Q6NSW3 | <i>Sphkap</i>   | A-kinase anchor   | High   | 3  | 4  | 4   | 4  | 1687 | 185   | 5.06  | 35   | 98.7  | 97.5  | 102.4 | 97    | 101.8 | 102.5 |
| Q9D0L8 | <i>Rnmt</i>     | mRNA cap          | High   | 24 | 8  | 11  | 8  | 465  | 53.3  | 6.48  | 178  | 99.7  | 97.9  | 108.5 | 94.2  | 97.3  | 102.5 |
| Q8BK08 | <i>Tmem11</i>   | Transmembrane     | High   | 9  | 2  | 3   | 2  | 190  | 21.3  | 7.36  | 46   | 93.2  | 98.3  | 90.3  | 105.7 | 105.9 | 106.6 |
| Q9CZP0 | <i>Ufsp1</i>    | Ufm1-specific     | High   | 6  | 1  | 1   | 1  | 217  | 23.4  | 6.7   | 37   |       |       |       |       |       |       |
| Q8JZN7 | <i>Rhot2</i>    | Mitochondrial     | High   | 15 | 6  | 9   | 4  | 620  | 69    | 6     | 184  | 95.7  | 100.1 | 103.4 | 97.4  | 100.6 | 102.8 |
| Q62167 | <i>Ddx3x</i>    | ATP-dependent     | High   | 46 | 27 | 41  | 7  | 662  | 73.1  | 7.18  | 746  | 98.9  | 101.4 | 96.9  | 105.3 | 99.5  | 98.1  |
| Q92111 | <i>Tf</i>       | Serotransferrin   | High   | 59 | 39 | 95  | 37 | 697  | 76.7  | 7.18  | 1372 | 177.6 | 66.7  | 219.2 | 43.8  | 45.9  | 46.8  |
| Q9DBX2 | <i>Pdcl</i>     | Phosducin-like    | High   | 6  | 2  | 2   | 2  | 301  | 34.4  | 4.87  | 24   | 96.6  | 106.2 | 98.4  | 100.4 | 96    | 102.3 |
| Q9D6H2 | <i>Hspb11</i>   | Intraflagellar    | Low    | 8  | 1  | 1   | 1  | 143  | 16.3  | 5.16  | 0    |       |       |       |       |       |       |
| Q8BU31 | <i>Rap2c</i>    | Ras-related       | High   | 60 | 8  | 16  | 4  | 183  | 20.7  | 4.94  | 406  | 94.2  | 100.8 | 104.7 | 96.5  | 102.7 | 101   |
| Q8BH55 | <i>Thns1</i>    | Threonine         | High   | 19 | 12 | 13  | 12 | 747  | 83    | 7.2   | 266  | 93.9  | 102.2 | 91    | 104.3 | 102.7 | 105.9 |
| Q6PHZ2 | <i>Camk2d</i>   | Calcium/calmod    | High   | 34 | 15 | 96  | 9  | 499  | 56.3  | 7.25  | 1700 | 97.8  | 81.9  | 104.2 | 97.4  | 113.6 | 105.1 |
| Q91W89 | <i>Man2c1</i>   | Alpha-            | High   | 8  | 6  | 6   | 6  | 1039 | 115.6 | 6.51  | 37   | 98    | 97.5  | 92.9  | 102.9 | 102.2 | 106.5 |
| Q9DB32 | <i>Haghl</i>    | Hydroxyacylgluta  | High   | 23 | 5  | 5   | 5  | 283  | 31.5  | 5.55  | 72   | 97.7  | 100.7 | 96.6  | 96.5  | 99.9  | 108.6 |
| Q9WVJ5 | <i>Crybb1</i>   | Beta-crystallin   | High   | 9  | 2  | 3   | 2  | 250  | 28    | 7.3   | 43   | 108.8 | 121.3 | 141.5 | 75.5  | 62.8  | 90.1  |
| Q60872 | <i>Eif1a</i>    | Eukaryotic        | High   | 26 | 4  | 6   | 1  | 144  | 16.5  | 5.24  | 96   |       |       |       |       |       |       |
| Q62420 | <i>Sh3gl2</i>   | Endophilin-A1     | High   | 46 | 18 | 70  | 13 | 352  | 39.9  | 5.39  | 1113 | 96.9  | 101.6 | 89    | 101   | 107.9 | 103.5 |
| Q91XE0 | <i>Glyat</i>    | Glycine N-        | Low    | 5  | 1  | 1   | 1  | 296  | 34.1  | 8.28  | 0    |       |       |       |       |       |       |
| Q3UIK4 | <i>Mettl14</i>  | N6-adenosine-     | High   | 3  | 1  | 1   | 1  | 456  | 52.1  | 6.21  | 18   |       |       |       |       |       |       |
| O88630 | <i>Gosr1</i>    | Golgi SNAP        | Medium | 5  | 1  | 1   | 1  | 250  | 28.5  | 9.29  | 0    | 108.3 | 100.6 | 107.6 | 96.2  | 92    | 95.2  |
| Q9DBG3 | <i>Ap2b1</i>    | AP-2 complex      | High   | 49 | 43 | 117 | 24 | 937  | 104.5 | 5.38  | 2241 | 100   | 97.1  | 99.3  | 103.1 | 101.9 | 98.8  |
| Q8BZA9 | <i>Tigar</i>    | Fructose-2,6-     | High   | 19 | 3  | 5   | 3  | 269  | 29.2  | 8.18  | 90   | 94.8  | 101.8 | 91.2  | 108.5 | 104.1 | 99.6  |
| Q9D2N4 | <i>Dtna</i>     | Dystrobrevin      | High   | 22 | 14 | 16  | 10 | 746  | 84    | 6.76  | 300  | 102.1 | 102.3 | 99.5  | 98.8  | 97.1  | 100.2 |
| Q60780 | <i>Gas7</i>     | Growth arrest-    | High   | 29 | 12 | 15  | 11 | 421  | 48.1  | 7.83  | 253  | 104.9 | 95.9  | 104.9 | 97.9  | 97.8  | 98.7  |
| Q9D8N2 | <i>Dennd10</i>  | DENN domain-      | Low    | 6  | 1  | 1   | 1  | 357  | 40.4  | 6.47  | 0    |       |       |       |       |       |       |
| Q9CYK1 | <i>Wars2</i>    | Tryptophan--      | High   | 9  | 4  | 5   | 4  | 360  | 40.1  | 8.82  | 49   | 91.6  | 104.5 | 83    | 108.4 | 106.8 | 105.7 |
| Q3UGS4 | <i>Mcrip1</i>   | Mapk-regulated    | High   | 58 | 5  | 6   | 5  | 97   | 11.1  | 9.14  | 84   | 96.9  | 98.2  | 97.6  | 104.8 | 104.1 | 98.4  |
| P35285 | <i>Rab22a</i>   | Ras-related       | High   | 34 | 5  | 8   | 3  | 194  | 21.8  | 8.15  | 189  | 97.6  | 110.2 | 95.1  | 106.6 | 92.6  | 97.9  |
| Q9Z0Y1 | <i>Dctn3</i>    | Dynactin subunit  | High   | 45 | 9  | 14  | 9  | 186  | 21    | 6.06  | 236  | 99.2  | 101.6 | 98.1  | 99.6  | 100.3 | 101.2 |
| O08810 | <i>Eftud2</i>   | 116 kDa U5        | High   | 36 | 27 | 39  | 26 | 971  | 109.3 | 5     | 676  | 101.6 | 98.1  | 99.5  | 99.1  | 101.3 | 100.4 |
| Q9D773 | <i>Mrpl2</i>    | 39S ribosomal     | High   | 7  | 2  | 2   | 2  | 306  | 33.3  | 11.06 | 34   | 91.3  | 86.4  | 94.7  | 99.4  | 109.7 | 118.5 |
| Q8BP92 | <i>Rcn2</i>     | Reticulocalbin-2  | High   | 39 | 10 | 14  | 10 | 320  | 37.2  | 4.42  | 344  | 97.2  | 92.3  | 106.2 | 98.2  | 103.4 | 102.8 |
| Q8BNL5 | <i>Kctd6</i>    | BTB/POZ           | High   | 5  | 1  | 1   | 1  | 237  | 27.6  | 5.96  | 22   | 111.6 | 95.5  | 108.5 | 94.8  | 94.3  | 95.2  |
| A2A8L5 | <i>Ptprf</i>    | Receptor-type     | High   | 6  | 8  | 12  | 4  | 1898 | 211.4 | 6.65  | 169  | 98.6  | 99.5  | 102.1 | 93.6  | 101.2 | 104.9 |
| B1AZP2 | <i>Dlgap4</i>   | Disks large-      | High   | 21 | 17 | 22  | 16 | 992  | 108   | 7.08  | 236  | 95.4  | 95.8  | 94.8  | 107.5 | 104.2 | 102.2 |
| P11911 | <i>Cd79a</i>    | B-cell antigen    | Low    | 4  | 1  | 1   | 1  | 220  | 24.6  | 5.11  | 0    |       |       |       |       |       |       |
| Q9Z110 | <i>Aldh18a1</i> | Delta-1-          | High   | 12 | 8  | 11  | 8  | 795  | 87.2  | 7.55  | 128  | 96    | 101.3 | 96.8  | 101.1 | 102   | 102.8 |
| S4R2P9 | <i>Slc8a3</i>   | Sodium/calcium    | High   | 3  | 2  | 2   | 2  | 928  | 102.9 | 5.24  | 61   | 85.2  | 88.5  | 84    | 95.2  | 148.9 | 98.2  |
| Q8C6B2 | <i>Rtkn</i>     | Rhotekin          | Low    | 1  | 1  | 1   | 1  | 564  | 63    | 6.67  | 17   | 87.7  | 94.3  | 93.2  | 93.4  | 105   | 126.5 |
| Q9JJK2 | <i>Lancl2</i>   | LanC-like protein | High   | 44 | 16 | 31  | 16 | 450  | 50.7  | 7.28  | 510  | 96.9  | 95.4  | 92.5  | 107.1 | 106.1 | 102.1 |
| Q9D7S7 | <i>Rpl22l1</i>  | 60S ribosomal     | High   | 16 | 2  | 2   | 2  | 122  | 14.5  | 9.45  | 43   | 120   | 88.8  | 147   | 78    | 84.5  | 81.7  |
| Q8R3Z5 | <i>Cacnb1</i>   | Voltage-          | High   | 18 | 8  | 13  | 4  | 597  | 65.4  | 6.62  | 164  | 86.1  | 93.4  | 94    | 96.3  | 96.9  | 133.3 |
| Q3UJD6 | <i>Usp19</i>    | Ubiquitin         | High   | 3  | 3  | 3   | 3  | 1360 | 150.5 | 6.38  | 23   | 101.4 | 99.3  | 91.1  | 100.2 | 106.2 | 101.8 |
| Q923B0 | <i>Ggact</i>    | Gamma-            | Medium | 11 | 1  | 1   | 1  | 149  | 17.1  | 5.29  | 0    |       |       |       |       |       |       |
| Q8BMI3 | <i>Gga3</i>     | ADP-ribosylation  | High   | 12 | 7  | 10  | 7  | 718  | 77.9  | 5.66  | 226  | 94.5  | 101.8 | 90.6  | 103   | 103.1 | 107   |
| Q99MR3 | <i>Slc12a9</i>  | Solute carrier    | High   | 5  | 3  | 3   | 3  | 914  | 96.3  | 7.02  | 48   | 119.3 | 92.5  | 118.3 | 85.4  | 96.2  | 88.2  |
| Q9D0F9 | <i>Pgm1</i>     | Phosphoglucom     | High   | 35 | 20 | 38  | 20 | 562  | 61.4  | 6.57  | 658  | 109.1 | 99.3  | 113   | 90.1  | 94.8  | 93.8  |
| Q9QYI3 | <i>Dnajc7</i>   | DnaJ homolog      | High   | 18 | 8  | 9   | 8  | 494  | 56.4  | 6.49  | 98   | 96.6  | 97.7  | 97.9  | 100   | 102.1 | 105.7 |
| Q9CPQ8 | <i>Atp5mg</i>   | ATP synthase      | High   | 55 | 5  | 17  | 5  | 103  | 11.4  | 9.74  | 286  | 98.1  | 105.5 | 92.8  | 101.1 | 103.3 | 99.2  |
| Q5QNQ6 | <i>Osbp2</i>    | Oxysterol-        | High   | 10 | 8  | 8   | 8  | 908  | 101.3 | 7.14  | 68   | 96.9  | 93.6  | 94.5  | 98.8  | 104   | 112.1 |
| Q60595 | <i>Xlr3a</i>    | X-linked          | Low    | 8  | 1  | 1   | 1  | 226  | 26.1  | 7.85  | 0    | 93.8  | 137.2 | 41.9  | 105.9 | 123.1 | 98.2  |
| P61358 | <i>Rpl27</i>    | 60S ribosomal     | High   | 35 | 4  | 8   | 4  | 136  | 15.8  | 10.56 | 82   | 108.4 | 104.9 | 103.1 | 96    | 92    | 95.6  |
| Q3UE37 | <i>Ube2z</i>    | Ubiquitin-        | High   | 7  | 2  | 2   | 2  | 356  | 38.3  | 5.62  | 31   | 96.7  | 95    | 110.5 | 98    | 98.4  | 101.3 |
| Q8CJ40 | <i>Crocc</i>    | Rootletin         | High   | 4  | 8  | 9   | 7  | 2009 | 226.8 | 5.55  | 158  | 97.6  | 96.5  | 94.2  | 96.3  | 106.3 | 109   |
| Q64669 | <i>Nqo1</i>     | NAD(P)H           | High   | 13 | 4  | 4   | 4  | 274  | 30.9  | 8.72  | 60   | 101.1 | 101.2 | 106   | 97.7  | 97.2  | 96.8  |
| Q9D1G3 | <i>Hhatl</i>    | Protein-cysteine  | Medium | 2  | 1  | 1   | 1  | 503  | 56.4  | 6.65  | 0    | 94.8  | 107.9 | 93.3  | 107   | 104.4 | 92.6  |
| Q921I9 | <i>Exosc4</i>   | Exosome           | High   | 12 | 2  | 2   | 2  | 245  | 26.2  | 6.15  | 42   | 103.7 | 100.9 | 87.1  | 101.9 | 103.6 | 102.8 |
| P06801 | <i>Me1</i>      | NADP-             | High   | 31 | 14 | 22  | 14 | 572  | 63.9  | 7.44  | 451  | 106.5 | 102.1 | 110.3 | 92    | 93.5  | 95.6  |



|        |                 |                    |        |    |    |    |    |      |       |       |      |       |       |       |       |       |       |
|--------|-----------------|--------------------|--------|----|----|----|----|------|-------|-------|------|-------|-------|-------|-------|-------|-------|
| P53810 | <i>Pitpna</i>   | Phosphatidylinos   | High   | 66 | 18 | 33 | 15 | 271  | 31.9  | 6.37  | 732  | 98.7  | 102.3 | 97.7  | 103.4 | 99.5  | 98.3  |
| Q811U4 | <i>Mfn1</i>     | Mitofusin-1        | High   | 3  | 2  | 2  | 1  | 741  | 83.7  | 6.51  | 68   | 93    | 90.8  | 100.9 | 112.7 | 107   | 95.6  |
| P18581 | <i>Slc7a2</i>   | Cationic amino     | High   | 5  | 3  | 3  | 3  | 657  | 71.8  | 7.15  | 45   | 100   | 104.2 | 91    | 115.2 | 93.1  | 96.5  |
| Q9CPV9 | <i>P2ry12</i>   | P2Y                | High   | 12 | 4  | 5  | 4  | 347  | 39.4  | 9.58  | 46   | 84.5  | 99.8  | 96.6  | 109.4 | 104.2 | 105.5 |
| Q91V64 | <i>Isoc1</i>    | Isochorismatase    | High   | 22 | 5  | 8  | 5  | 297  | 32    | 7.39  | 141  | 105.2 | 101.1 | 101.9 | 101.7 | 96    | 94.1  |
| Q6ZPE2 | <i>Sbf1</i>     | Myotubularin-      | High   | 23 | 34 | 54 | 32 | 1867 | 208.6 | 7.12  | 1090 | 94.4  | 98.5  | 96.1  | 103.3 | 101.9 | 105.8 |
| Q8BZZ3 | <i>Wwp1</i>     | NEDD4-like E3      | High   | 4  | 3  | 5  | 2  | 918  | 104.6 | 6.38  | 68   | 99.2  | 111.8 | 89.9  | 96.4  | 106.4 | 96.3  |
| Q9QXQ1 | <i>Pde7b</i>    | cAMP-specific      | Low    | 2  | 1  | 1  | 1  | 446  | 51.3  | 7.4   | 17   | 92.4  | 119.7 | 75.2  | 97.5  | 110.9 | 104.3 |
| Q8C052 | <i>Map1s</i>    | Microtubule-       | High   | 8  | 7  | 7  | 7  | 973  | 102.9 | 7.02  | 80   | 99.4  | 95.4  | 95.2  | 101.1 | 102.8 | 106.1 |
| P29788 | <i>Vtn</i>      | Vitronectin        | Medium | 2  | 1  | 1  | 1  | 478  | 54.8  | 5.88  | 14   | 145.8 | 104.9 | 131.3 | 74.4  | 76.4  | 67.2  |
| P22682 | <i>Cbl</i>      | E3 ubiquitin-      | High   | 4  | 3  | 3  | 3  | 913  | 100.5 | 6.67  | 34   | 96.4  | 100.7 | 107.4 | 96.6  | 104.9 | 94    |
| P97298 | <i>Serpinf1</i> | Pigment            | High   | 3  | 1  | 1  | 1  | 417  | 46.2  | 6.98  | 21   |       |       |       |       |       |       |
| Q9CQY1 | <i>Atg12</i>    | Ubiquitin-like     | Medium | 6  | 1  | 1  | 1  | 141  | 15.2  | 4.97  | 19   | 97.3  | 101   | 89.8  | 106.7 | 104.5 | 100.5 |
| Q9DCN2 | <i>Cyb5r3</i>   | NADH-              | High   | 27 | 7  | 9  | 7  | 301  | 34.1  | 8.38  | 176  | 107.4 | 100.2 | 116.4 | 90.6  | 92.4  | 93    |
| Q8CGY8 | <i>Ogt</i>      | UDP-N-             | High   | 29 | 24 | 38 | 24 | 1046 | 116.9 | 6.7   | 573  | 96    | 98.5  | 93.3  | 106.3 | 104.5 | 101.4 |
| Q8R1X6 | <i>Spart</i>    | Spartin OS=Mus     | High   | 7  | 5  | 5  | 5  | 671  | 72.6  | 5.86  | 36   | 100.2 | 103.9 | 102.6 | 94.8  | 98    | 100.5 |
| Q9CR68 | <i>Uqcrls1</i>  | Cytochrome b-c1    | High   | 47 | 10 | 22 | 10 | 274  | 29.3  | 8.7   | 395  | 96    | 104.9 | 92.1  | 103.2 | 103.6 | 100.1 |
| O55060 | <i>Tpmt</i>     | Thiopurine S-      | High   | 8  | 2  | 2  | 2  | 240  | 27.6  | 6.44  | 35   |       |       |       |       |       |       |
| Q64191 | <i>Aga</i>      | N(4)-(beta-N-      | Medium | 4  | 1  | 1  | 1  | 346  | 37    | 6.44  | 24   |       |       |       |       |       |       |
| Q9CWU9 | <i>Nup37</i>    | Nucleoporin        | Medium | 5  | 1  | 1  | 1  | 326  | 36.7  | 6.09  | 0    | 86.2  | 108.4 | 107.3 | 94.1  | 102.5 | 101.5 |
| Q61161 | <i>Map4k2</i>   | Mitogen-           | High   | 4  | 2  | 2  | 2  | 821  | 91.2  | 6.46  | 99   | 85.4  | 99.7  | 89.7  | 109.2 | 99.8  | 116.2 |
| P62878 | <i>Rbx1</i>     | E3 ubiquitin-      | High   | 17 | 1  | 2  | 1  | 108  | 12.3  | 6.96  | 55   | 98.3  | 133.9 | 85.4  | 89.2  | 82.8  | 110.3 |
| G3X9K3 | <i>Arfgef1</i>  | Brefeldin A-       | High   | 10 | 16 | 20 | 9  | 1846 | 208.4 | 5.86  | 308  | 94.1  | 99.6  | 95.1  | 104.3 | 102.1 | 104.8 |
| P12367 | <i>Prkar2a</i>  | cAMP-              | High   | 43 | 14 | 31 | 12 | 401  | 45.4  | 4.89  | 657  | 99.5  | 99.3  | 96    | 101.4 | 102   | 101.8 |
| Q6P3A8 | <i>Bckdhb</i>   | 2-oxoisovalerate   | High   | 14 | 4  | 4  | 4  | 390  | 42.9  | 6.7   | 73   | 104.8 | 98.3  | 96.7  | 104   | 99.6  | 96.6  |
| O54991 | <i>Cntnap1</i>  | Contactin-         | High   | 15 | 19 | 25 | 19 | 1385 | 156.2 | 7.06  | 307  | 99.4  | 109.1 | 95.2  | 100.1 | 94.7  | 101.4 |
| P80316 | <i>Cct5</i>     | T-complex          | High   | 56 | 23 | 46 | 22 | 541  | 59.6  | 6.02  | 705  | 99.4  | 102.1 | 111.3 | 95.2  | 96.4  | 95.5  |
| Q8BWW3 | <i>Etf1</i>     | Eukaryotic         | High   | 22 | 10 | 13 | 10 | 437  | 49    | 5.71  | 155  | 97.3  | 95.6  | 100.9 | 100.5 | 100.4 | 105.2 |
| P56376 | <i>Acyp1</i>    | Acylphosphatase    | High   | 72 | 6  | 9  | 6  | 99   | 11.2  | 9.04  | 160  | 91.5  | 103.7 | 92.1  | 104.1 | 101.4 | 107.2 |
| Q9Z2E9 | <i>Bsc12</i>    | Seipin OS=Mus      | High   | 5  | 2  | 3  | 2  | 383  | 43.1  | 6.14  | 29   | 90.5  | 89.2  | 101.3 | 105.7 | 104.9 | 108.4 |
| Q80XI3 | <i>Eif4g3</i>   | Eukaryotic         | High   | 18 | 25 | 30 | 22 | 1579 | 174.8 | 5.53  | 283  | 100.1 | 99.4  | 97.1  | 102.3 | 99.8  | 101.4 |
| Q5DU31 | <i>Ipcef1</i>   | Interactor protein | High   | 8  | 3  | 3  | 3  | 406  | 45.8  | 6.73  | 32   | 98.4  | 102.5 | 97.6  | 104.4 | 101.4 | 95.8  |
| Q9D2R8 | <i>Mrps33</i>   | 28S ribosomal      | High   | 11 | 1  | 2  | 1  | 106  | 12.5  | 10.26 | 53   | 94    | 111.3 | 97.6  | 102.8 | 98.5  | 95.7  |
| O35435 | <i>Dhodh</i>    | Dihydroorotate     | High   | 16 | 4  | 5  | 4  | 395  | 42.7  | 9.55  | 66   | 97.3  | 102.7 | 89    | 101.1 | 107.4 | 102.5 |
| P02469 | <i>Lamb1</i>    | Laminin subunit    | High   | 3  | 4  | 4  | 4  | 1786 | 197   | 4.94  | 108  | 95.8  | 97.4  | 98.5  | 109   | 103.3 | 96.1  |
| Q8R480 | <i>Nup85</i>    | Nuclear pore       | High   | 5  | 3  | 3  | 3  | 656  | 74.7  | 5.57  | 83   | 101.8 | 96    | 98.3  | 105.8 | 98    | 100.1 |
| Q8CE46 | <i>Pus7l</i>    | Pseudouridylate    | Medium | 2  | 1  | 1  | 1  | 702  | 79.1  | 7.81  | 0    |       |       |       |       |       |       |
| Q8K354 | <i>Cbr3</i>     | Carbonyl           | High   | 43 | 9  | 11 | 8  | 277  | 30.9  | 6.57  | 126  | 97.7  | 101.1 | 99.2  | 98    | 102.3 | 101.5 |
| Q8CIG8 | <i>Prmt5</i>    | Protein arginine   | High   | 14 | 8  | 10 | 8  | 637  | 72.6  | 6.42  | 182  | 99.4  | 97.7  | 98.7  | 98.9  | 102.7 | 102.7 |
| Q8CHG7 | <i>Rapgef2</i>  | Rap guanine        | High   | 22 | 23 | 31 | 23 | 1496 | 166.3 | 6.61  | 430  | 96.7  | 97.4  | 98.2  | 102.9 | 102.4 | 102.3 |
| P56671 | <i>Maz</i>      | Myc-associated     | Low    | 1  | 1  | 1  | 1  | 477  | 48.7  | 8.95  | 0    | 108   | 99.4  | 134   | 90.6  | 82    | 86    |
| Q9CQ62 | <i>Decr1</i>    | 2,4-dienoyl-CoA    | High   | 15 | 5  | 7  | 5  | 335  | 36.2  | 8.95  | 184  | 106.5 | 105.8 | 112.2 | 88.7  | 94.1  | 92.7  |
| P84089 | <i>Erh</i>      | Enhancer of        | High   | 40 | 4  | 5  | 4  | 104  | 12.3  | 5.92  | 121  | 99.4  | 97.6  | 100.7 | 103.3 | 104   | 95    |
| Q9D3D9 | <i>Atp5f1d</i>  | ATP synthase       | High   | 14 | 2  | 5  | 2  | 168  | 17.6  | 5.08  | 125  | 98.9  | 103.4 | 92.7  | 100.5 | 102.1 | 102.4 |
| Q6PJN8 | <i>Dalrd3</i>   | DALR anticodon-    | Medium | 2  | 1  | 1  | 1  | 538  | 58.7  | 8.15  | 0    |       |       |       |       |       |       |
| Q99JY8 | <i>Plpp3</i>    | Phospholipid       | High   | 16 | 6  | 10 | 6  | 312  | 35.2  | 9.07  | 160  | 102.3 | 97    | 109.4 | 97.1  | 98    | 96.2  |
| P25444 | <i>Rps2</i>     | 40S ribosomal      | High   | 47 | 13 | 28 | 13 | 293  | 31.2  | 10.24 | 535  | 103   | 99.5  | 106.6 | 100   | 96.3  | 94.6  |
| Q62086 | <i>Pon2</i>     | Serum              | High   | 8  | 3  | 3  | 3  | 354  | 39.6  | 5.83  | 73   | 106.5 | 101.2 | 110   | 91.6  | 94.9  | 95.8  |
| Q7TPD3 | <i>Robo2</i>    | Roundabout         | High   | 7  | 8  | 8  | 8  | 1470 | 161.1 | 6.33  | 74   | 93.2  | 100.4 | 88.9  | 105.5 | 103.5 | 108.5 |
| P46471 | <i>Psmc2</i>    | 26S proteasome     | High   | 56 | 21 | 32 | 21 | 433  | 48.6  | 5.95  | 554  | 99.8  | 99.4  | 101.1 | 98.8  | 101.2 | 99.7  |
| Q61220 | <i>Nell2</i>    | Protein kinase     | High   | 3  | 3  | 4  | 3  | 819  | 91.4  | 5.82  | 78   | 97.3  | 105.4 | 99.4  | 103.7 | 96    | 98.3  |
| O54786 | <i>Dffa</i>     | DNA                | High   | 5  | 1  | 1  | 1  | 331  | 36.6  | 4.91  | 30   | 90.1  | 98.4  | 80    | 116.1 | 99.1  | 116.4 |
| P31725 | <i>S100a9</i>   | Protein S100-A9    | High   | 45 | 5  | 11 | 5  | 113  | 13    | 7.17  | 153  | 104.1 | 71.9  | 302.5 | 36.9  | 42.6  | 42    |
| Q8CGK7 | <i>Gnal</i>     | Guanine            | High   | 26 | 8  | 16 | 6  | 381  | 44.3  | 6.65  | 291  | 81.2  | 93.7  | 84.3  | 101.6 | 120   | 119.3 |
| Q91W39 | <i>Ncoa5</i>    | Nuclear receptor   | High   | 3  | 2  | 2  | 2  | 579  | 65.3  | 9.82  | 24   | 97.6  | 90.6  | 98.7  | 101.7 | 102.6 | 108.8 |
| Q8CHU3 | <i>Epn2</i>     | Epsin-2 OS=Mus     | High   | 9  | 5  | 8  | 5  | 595  | 63.4  | 8.16  | 155  | 95.3  | 103.9 | 95.7  | 101.4 | 101.3 | 102.3 |
| Q9CQN7 | <i>Mrpl41</i>   | 39S ribosomal      | High   | 28 | 3  | 5  | 3  | 135  | 15.3  | 9.82  | 106  | 87.9  | 94    | 110.2 | 104.5 | 100.9 | 102.4 |
| D3YXJ0 | <i>Dgkh</i>     | Diacylglycerol     | High   | 16 | 14 | 19 | 13 | 1211 | 134   | 6.52  | 396  | 88.6  | 96.6  | 88.7  | 106.8 | 108.8 | 110.5 |
| Q60598 | <i>Cttn</i>     | Src substrate      | High   | 28 | 16 | 28 | 16 | 546  | 61.2  | 5.4   | 460  | 94.7  | 95.1  | 93.4  | 106.6 | 109.2 | 101.2 |
| Q8BW96 | <i>Camk1d</i>   | Calcium/calmod     | High   | 37 | 11 | 20 | 7  | 385  | 42.9  | 7.17  | 415  | 100   | 104.9 | 93    | 101.2 | 101.4 | 99.5  |
| P62696 | <i>Crybb2</i>   | Beta-crystallin    | Medium | 8  | 1  | 1  | 1  | 205  | 23.4  | 7.01  | 18   | 40.3  | 84.5  | 80.5  | 55    | 203.3 | 136.4 |
| P14602 | <i>Hspb1</i>    | Heat shock         | High   | 22 | 4  | 6  | 4  | 209  | 23    | 6.55  | 85   | 133.2 | 96.4  | 138.6 | 72.8  | 72.8  | 86.3  |
| Q99LR1 | <i>Abhd12</i>   | Lysophosphatidy    | High   | 24 | 7  | 10 | 7  | 398  | 45.2  | 8.72  | 149  | 101.9 | 101.8 | 107.9 | 99.1  | 93.8  | 95.4  |
| Q9Z1K6 | <i>Arih2</i>    | E3 ubiquitin-      | Medium | 3  | 1  | 1  | 1  | 492  | 57.7  | 5.69  | 0    | 90.6  | 98.6  | 96.5  | 94.1  | 105   | 115.2 |
| Q80W04 | <i>Tmcc2</i>    | Transmembrane      | High   | 5  | 2  | 2  | 2  | 706  | 77    | 6.84  | 27   | 93.5  | 96.9  | 104.3 | 98.9  | 103.8 | 102.6 |
| P97490 | <i>Adcy8</i>    | Adenylate          | High   | 2  | 2  | 2  | 2  | 1249 | 140   | 6.93  | 28   | 93.4  | 86.9  | 87.8  | 97.4  | 114.4 | 120   |
| Q6ZQB6 | <i>Ppip5k2</i>  | Inositol           | High   | 3  | 2  | 2  | 1  | 1129 | 128.3 | 7.94  | 21   | 103.9 | 92.2  | 82.3  | 100   | 113.3 | 108.3 |
| P70122 | <i>Sbds</i>     | Ribosome           | High   | 32 | 8  | 10 | 8  | 250  | 28.8  | 8.76  | 113  | 95.2  | 101.9 | 100.2 | 97.7  | 100.8 | 104.2 |

|        |                 |                  |        |    |    |     |    |      |       |       |      |       |       |       |       |       |       |
|--------|-----------------|------------------|--------|----|----|-----|----|------|-------|-------|------|-------|-------|-------|-------|-------|-------|
| Q62433 | <i>Ndrp1</i>    | Protein NDRG1    | High   | 26 | 8  | 16  | 8  | 394  | 43    | 6.1   | 157  | 101.6 | 106.4 | 104.1 | 94.2  | 97.7  | 95.9  |
| Q8K2L8 | <i>Trappc12</i> | Trafficking      | High   | 10 | 6  | 7   | 6  | 797  | 87.6  | 4.81  | 60   | 99.5  | 101.9 | 92    | 107.4 | 98.5  | 100.7 |
| Q7TN99 | <i>Cpeb3</i>    | Cytoplasmic      | High   | 3  | 2  | 3   | 2  | 716  | 78.3  | 7.42  | 31   | 97.7  | 104   | 85.6  | 101.2 | 103.9 | 107.7 |
| Q8K2K6 | <i>Agfg1</i>    | Arf-GAP domain   | High   | 21 | 9  | 10  | 9  | 561  | 58    | 8.63  | 215  | 94.8  | 98.4  | 91    | 103   | 108.5 | 104.3 |
| Q8CCJ3 | <i>Ufl1</i>     | E3 UFM1-protein  | High   | 13 | 9  | 11  | 9  | 793  | 89.5  | 6.67  | 129  | 99.9  | 96.7  | 113   | 93.5  | 95.4  | 101.5 |
| O54774 | <i>Ap3d1</i>    | AP-3 complex     | High   | 29 | 28 | 43  | 28 | 1199 | 135   | 7.37  | 621  | 93.4  | 95.6  | 93.3  | 106.6 | 107.1 | 104   |
| Q14BB9 | <i>Map6d1</i>   | MAP6 domain-     | High   | 39 | 5  | 8   | 5  | 191  | 20.4  | 9.88  | 108  | 99    | 115.5 | 80.9  | 103.1 | 103.7 | 97.8  |
| Q9JIS5 | <i>Sv2a</i>     | Synaptic vesicle | High   | 17 | 13 | 29  | 12 | 742  | 82.6  | 5.57  | 522  | 95.4  | 95.4  | 98.4  | 107.2 | 102.5 | 101   |
| Q80U19 | <i>Daam2</i>    | Disheveled-      | High   | 10 | 11 | 11  | 10 | 1115 | 128.3 | 6.92  | 118  | 88.1  | 107.1 | 89.8  | 107.8 | 101.8 | 105.4 |
| P31650 | <i>Slc6a11</i>  | Sodium- and      | High   | 14 | 9  | 19  | 8  | 627  | 69.9  | 6.98  | 368  | 100   | 100.1 | 91    | 101.9 | 104.4 | 102.6 |
| Q61290 | <i>Cacna1e</i>  | Voltage-         | High   | 8  | 13 | 18  | 12 | 2272 | 257.1 | 8.18  | 287  | 94    | 92.9  | 93.4  | 103.5 | 107   | 109.2 |
| Q8K010 | <i>Oplah</i>    | 5-oxoprolinase   | High   | 21 | 19 | 20  | 19 | 1288 | 137.5 | 6.28  | 307  | 100.3 | 97.2  | 99.5  | 98.9  | 99.4  | 104.7 |
| Q99LE6 | <i>Abcf2</i>    | ATP-binding      | High   | 11 | 6  | 8   | 6  | 628  | 71.7  | 7.05  | 115  | 100   | 104.3 | 99.8  | 97.4  | 98.4  | 100.1 |
| Q9D7X1 | <i>Kctd4</i>    | BTB/POZ          | High   | 22 | 4  | 4   | 4  | 259  | 30    | 7.06  | 82   | 103.2 | 93.9  | 118.5 | 85.4  | 104.6 | 94.3  |
| O35855 | <i>Bcat2</i>    | Branched-chain-  | High   | 9  | 3  | 3   | 3  | 393  | 44.1  | 8.29  | 27   | 97    | 94.8  | 102.1 | 100.1 | 100.1 | 105.9 |
| Q3UHE1 | <i>Pitpnm3</i>  | Membrane-        | High   | 5  | 5  | 5   | 5  | 974  | 106.4 | 7.12  | 51   | 95.5  | 95.6  | 97.5  | 108.9 | 96.8  | 105.7 |
| P01664 |                 | Ig kappa chain   | High   | 14 | 1  | 1   | 1  | 111  | 12    | 4.56  | 38   |       |       |       |       |       |       |
| Q99KK9 | <i>Hars2</i>    | Histidine--tRNA  | High   | 12 | 6  | 8   | 3  | 505  | 56.9  | 8.32  | 91   | 97.1  | 102.2 | 89.7  | 99.4  | 106   | 105.5 |
| P15532 | <i>Nme1</i>     | Nucleoside       | High   | 71 | 12 | 29  | 7  | 152  | 17.2  | 7.37  | 386  | 102   | 102   | 96    | 104.6 | 96.4  | 99    |
| Q3TY65 | <i>Ica1l</i>    | Islet cell       | High   | 6  | 2  | 2   | 1  | 431  | 48.1  | 4.91  | 22   | 103.6 | 83.2  | 92.1  | 104.4 | 111.7 | 105.1 |
| O88951 | <i>Lin7b</i>    | Protein lin-7    | High   | 19 | 4  | 8   | 2  | 207  | 22.9  | 8.68  | 135  | 93.7  | 105.1 | 84.8  | 103.4 | 104.7 | 108.3 |
| Q64152 | <i>Btf3</i>     | Transcription    | High   | 17 | 2  | 2   | 2  | 204  | 22    | 9.52  | 24   |       |       |       |       |       |       |
| Q8C7Q4 | <i>Rbm4</i>     | RNA-binding      | High   | 7  | 3  | 3   | 3  | 361  | 40    | 7.06  | 38   | 102.8 | 97.5  | 112.4 | 98.6  | 88.1  | 100.4 |
| Q8VHY0 | <i>Cspg4</i>    | Chondroitin      | High   | 4  | 5  | 5   | 5  | 2327 | 252.2 | 5.44  | 89   | 96.9  | 93.9  | 94.7  | 105.2 | 101.8 | 107.5 |
| Q640M6 | <i>Gdpd5</i>    | Glycerophospho   | High   | 5  | 2  | 2   | 2  | 607  | 68.8  | 8     | 20   | 97.3  | 103   | 100.1 | 95.4  | 97.4  | 106.8 |
| P62806 | <i>H4c1</i>     | Histone H4       | High   | 59 | 9  | 66  | 9  | 103  | 11.4  | 11.36 | 1243 | 105.6 | 98.5  | 113.2 | 95.2  | 95.7  | 91.8  |
| Q69ZK0 | <i>Prex1</i>    | Phosphatidylinos | High   | 11 | 13 | 13  | 13 | 1650 | 184.8 | 6.29  | 174  | 99.4  | 101.3 | 97.4  | 101.9 | 95.7  | 104.2 |
| Q8C437 | <i>Pex5l</i>    | PEX5-related     | High   | 21 | 9  | 12  | 9  | 567  | 63.1  | 5.33  | 142  | 99.8  | 103   | 100.2 | 101.7 | 97.1  | 98.2  |
| Q8BL03 | <i>Slc25a29</i> | Mitochondrial    | Low    | 4  | 1  | 1   | 1  | 306  | 32.7  | 8.62  | 0    | 80.7  | 84.1  | 81.8  | 121.3 | 138.4 | 93.7  |
| Q91VR2 | <i>Atp5f1c</i>  | ATP synthase     | High   | 32 | 9  | 35  | 9  | 298  | 32.9  | 9.01  | 761  | 97.2  | 106.1 | 89.5  | 102.9 | 103.1 | 101.3 |
| B2RWJ3 | <i>Tmem240</i>  | Transmembrane    | Low    | 6  | 1  | 1   | 1  | 173  | 20    | 7.8   | 0    | 90.5  | 97.9  | 97.1  | 116.1 | 93.6  | 104.8 |
| P61979 | <i>Hnrmpk</i>   | Heterogeneous    | High   | 50 | 17 | 41  | 17 | 463  | 50.9  | 5.54  | 825  | 100.9 | 97.9  | 100.3 | 100.7 | 100.5 | 99.7  |
| Q8CAB8 | <i>Castor2</i>  | Cytosolic        | High   | 12 | 3  | 4   | 3  | 329  | 36.1  | 5.45  | 93   | 101.8 | 92.4  | 95.7  | 101.7 | 110.8 | 97.5  |
| Q9CQV8 | <i>Ywhab</i>    | 14-3-3 protein   | High   | 65 | 13 | 102 | 7  | 246  | 28.1  | 4.83  | 1947 | 98.8  | 97.2  | 96.2  | 102.9 | 104.1 | 100.8 |
| Q80TL7 | <i>Mon2</i>     | Protein MON2     | High   | 4  | 7  | 9   | 7  | 1715 | 189   | 6.13  | 123  | 98.7  | 99.5  | 97.8  | 96.9  | 103.2 | 103.9 |
| Q9ER41 | <i>Tor1b</i>    | Torsin-1B        | Medium | 6  | 1  | 1   | 1  | 336  | 37.8  | 8.02  | 0    | 90.5  | 95.1  | 124.9 | 84.3  | 106.4 | 98.8  |
| P41242 | <i>Matk</i>     | Megakaryocyte-   | High   | 7  | 3  | 3   | 3  | 505  | 56    | 8.81  | 69   | 84.8  | 95    | 100.8 | 88.4  | 101.7 | 129.3 |
| Q99KW9 | <i>Itfg1</i>    | T-cell           | High   | 5  | 3  | 4   | 3  | 610  | 67.4  | 5.73  | 64   | 98.8  | 102.7 | 100.6 | 98.3  | 98.2  | 101.4 |
| P11983 | <i>Tcp1</i>     | T-complex        | High   | 76 | 30 | 50  | 30 | 556  | 60.4  | 6.16  | 1156 | 101.5 | 101.5 | 106   | 96    | 98.5  | 96.6  |
| Q91ZH7 | <i>Abhd3</i>    | Phospholipase    | High   | 9  | 3  | 3   | 3  | 411  | 46.2  | 7.49  | 55   | 106.2 | 95.1  | 95    | 104.3 | 93    | 106.4 |
| Q8BIV3 | <i>Ranbp6</i>   | Ran-binding      | High   | 8  | 7  | 9   | 6  | 1105 | 124.5 | 5.03  | 149  | 98.4  | 94.1  | 97.4  | 99.4  | 111.5 | 99.2  |
| P42932 | <i>Cct8</i>     | T-complex        | High   | 63 | 29 | 52  | 29 | 548  | 59.5  | 5.62  | 1012 | 100.4 | 101.1 | 101.7 | 98.9  | 98.7  | 99.2  |
| Q3UN90 | <i>Lym9</i>     | LYR motif-       | Medium | 14 | 1  | 1   | 1  | 78   | 9.3   | 8.91  | 0    |       |       |       |       |       |       |
| Q8BZ98 | <i>Dnm3</i>     | Dynamin-3        | High   | 38 | 30 | 71  | 16 | 863  | 97.1  | 8.35  | 1120 | 97.6  | 99.1  | 92.1  | 105.8 | 102.4 | 102.9 |
| Q8BH95 | <i>Echs1</i>    | Enoyl-CoA        | High   | 40 | 12 | 25  | 12 | 290  | 31.5  | 8.48  | 459  | 96.3  | 104.1 | 97    | 101.3 | 101.5 | 99.7  |
| Q8VE99 | <i>Ccdc115</i>  | Coiled-coil      | High   | 15 | 2  | 2   | 2  | 180  | 19.7  | 8.81  | 48   | 99.3  | 102.2 | 95.1  | 105.4 | 86.2  | 111.6 |
| Q03146 | <i>Ddr1</i>     | Epithelial       | Low    | 1  | 1  | 1   | 1  | 911  | 101.1 | 6.58  | 0    |       |       |       |       |       |       |
| Q8R1B5 | <i>Cplx3</i>    | Complexin-3      | High   | 58 | 6  | 6   | 6  | 158  | 17.6  | 4.89  | 97   | 96.9  | 99.2  | 87.5  | 103.3 | 110.5 | 102.6 |
| Q8R464 | <i>Cadm4</i>    | Cell adhesion    | High   | 34 | 9  | 14  | 9  | 388  | 42.7  | 6.3   | 269  | 95    | 103.1 | 97.9  | 102.8 | 97.8  | 103.4 |
| Q61176 | <i>Arg1</i>     | Arginase-1       | High   | 15 | 3  | 4   | 3  | 323  | 34.8  | 7.01  | 53   | 105.6 | 92.8  | 181.6 | 72.9  | 73.5  | 73.6  |
| Q3TIR1 | <i>Trappc13</i> | Trafficking      | High   | 9  | 4  | 4   | 4  | 417  | 46.4  | 5.49  | 24   | 95.8  | 103.2 | 102.4 | 97.8  | 95.1  | 105.6 |
| Q9CR57 | <i>Rpl14</i>    | 60S ribosomal    | High   | 29 | 6  | 11  | 6  | 217  | 23.5  | 11.02 | 308  | 103   | 101.8 | 103.6 | 97    | 97.5  | 97    |
| Q8R0Y6 | <i>Aldh1l1</i>  | Cytosolic 10-    | High   | 55 | 41 | 72  | 36 | 902  | 98.6  | 5.91  | 958  | 116.6 | 98.4  | 126.6 | 85    | 85.5  | 87.9  |
| Q35114 | <i>Scarb2</i>   | Lysosome         | High   | 7  | 3  | 4   | 3  | 478  | 54    | 5.1   | 72   | 103   | 103.7 | 112.6 | 94.4  | 93.3  | 93    |
| Q05512 | <i>Mark2</i>    | Serine/threonine | High   | 17 | 11 | 16  | 7  | 776  | 86.3  | 9.67  | 222  | 92.4  | 100.3 | 89.5  | 109.2 | 107.7 | 101   |
| Q8VCR7 | <i>Abhd14b</i>  | Protein          | High   | 10 | 2  | 3   | 2  | 210  | 22.4  | 6.27  | 73   | 89.9  | 98.2  | 97.4  | 105.4 | 104.2 | 105   |
| P53811 | <i>Pitpnb</i>   | Phosphatidylinos | High   | 45 | 11 | 11  | 8  | 271  | 31.5  | 6.95  | 198  | 98.6  | 103.5 | 103.9 | 100.8 | 96.9  | 96.4  |
| P14869 | <i>Rplp0</i>    | 60S acidic       | High   | 46 | 11 | 25  | 11 | 317  | 34.2  | 6.25  | 537  | 104.2 | 99.9  | 107.7 | 95.7  | 96.3  | 96.3  |
| Q80X85 | <i>Mrps7</i>    | 28S ribosomal    | High   | 17 | 3  | 3   | 3  | 242  | 28    | 9.94  | 46   | 98    | 90.4  | 90.8  | 112   | 90.8  | 118   |
| P97470 | <i>Ppp4c</i>    | Serine/threonine | High   | 14 | 3  | 5   | 2  | 307  | 35.1  | 5.06  | 109  | 102   | 103.1 | 103.5 | 87.6  | 104.7 | 99.1  |
| Q9EPB4 | <i>Pycard</i>   | Apoptosis-       | High   | 51 | 7  | 10  | 7  | 193  | 21.4  | 5.43  | 218  | 137.6 | 114   | 172.5 | 56.1  | 59.4  | 60.4  |
| Q5SVL6 | <i>Rap1gap2</i> | Rap1 GTPase-     | High   | 31 | 15 | 28  | 15 | 712  | 78.2  | 6.43  | 558  | 101.3 | 102   | 105.9 | 95.7  | 96.5  | 98.6  |
| Q920E5 | <i>Fdps</i>     | Farnesyl         | High   | 17 | 5  | 8   | 5  | 353  | 40.6  | 5.66  | 195  | 100.9 | 102.2 | 96.2  | 105.2 | 97.3  | 98.3  |
| P27641 | <i>Xrcc5</i>    | X-ray repair     | Low    | 1  | 1  | 1   | 1  | 732  | 83    | 5.16  | 0    | 103.9 | 97.6  | 104.6 | 97.2  | 97    | 99.6  |
| Q9CQ85 | <i>Timm22</i>   | Mitochondrial    | High   | 23 | 2  | 2   | 2  | 194  | 20.1  | 8.22  | 40   | 85.6  | 95    | 89.4  | 110.2 | 110.7 | 109.1 |
| Q8BG93 | <i>Nudt15</i>   | Nucleotide       | Medium | 6  | 1  | 1   | 1  | 170  | 19.6  | 5.27  | 0    | 102.3 | 93.3  | 110.7 | 96.8  | 95.2  | 101.6 |
| P47857 | <i>Pfkm</i>     | ATP-dependent    | High   | 56 | 34 | 80  | 31 | 780  | 85.2  | 8     | 1546 | 100.1 | 98.5  | 96.5  | 101.5 | 103.1 | 100.3 |
| Q8BKY8 | <i>Mterf2</i>   | Transcription    | Medium | 2  | 1  | 1   | 1  | 385  | 43.4  | 8.94  | 22   |       |       |       |       |       |       |

|        |                |                   |        |    |    |     |    |      |       |       |      |       |       |       |       |       |       |
|--------|----------------|-------------------|--------|----|----|-----|----|------|-------|-------|------|-------|-------|-------|-------|-------|-------|
| Q8K441 | <i>Abca6</i>   | ATP-binding       | Low    | 1  | 1  | 1   | 1  | 1624 | 183.2 | 6.93  | 0    |       |       |       |       |       |       |
| Q8CGC6 | <i>Rbm28</i>   | RNA-binding       | Low    | 1  | 1  | 1   | 1  | 750  | 84.2  | 9.54  | 25   | 101.2 | 105.7 | 87.5  | 100.5 | 105.4 | 99.7  |
| P01029 | <i>C4b</i>     | Complement C4-    | High   | 11 | 15 | 21  | 15 | 1738 | 192.8 | 7.53  | 396  | 143.6 | 104.7 | 157.5 | 62.4  | 64.7  | 67.2  |
| P14733 | <i>Lmnb1</i>   | Lamin-B1          | High   | 44 | 31 | 44  | 27 | 588  | 66.7  | 5.16  | 595  | 102.1 | 95.4  | 105.8 | 96.8  | 101.1 | 98.7  |
| Q9DCT2 | <i>Ndufs3</i>  | NADH              | High   | 37 | 10 | 29  | 10 | 263  | 30.1  | 7.17  | 598  | 97    | 102.7 | 92    | 106.7 | 101   | 100.7 |
| Q8BHN0 | <i>Ppm1l</i>   | Protein           | High   | 16 | 5  | 6   | 5  | 360  | 41    | 5.99  | 118  | 93.9  | 106.2 | 86.1  | 101.7 | 106.4 | 105.7 |
| P62889 | <i>Rpl30</i>   | 60S ribosomal     | High   | 59 | 6  | 10  | 6  | 115  | 12.8  | 9.63  | 182  | 106.2 | 102.5 | 105.9 | 94.4  | 94.6  | 96.3  |
| Q9QWR8 | <i>Naga</i>    | Alpha-N-          | High   | 11 | 4  | 5   | 4  | 415  | 47.2  | 6.44  | 98   | 102.3 | 102.1 | 108.6 | 94.6  | 96.3  | 96.1  |
| Q922Q8 | <i>Lrrc59</i>  | Leucine-rich      | High   | 29 | 9  | 13  | 9  | 307  | 34.9  | 9.52  | 189  | 104.6 | 105.2 | 107.7 | 95.4  | 95.9  | 91.2  |
| Q05144 | <i>Rac2</i>    | Ras-related C3    | High   | 29 | 5  | 12  | 1  | 192  | 21.4  | 7.61  | 237  | 130.7 | 105.9 | 163.6 | 61.4  | 67.3  | 71    |
| Q9CWX9 | <i>Atic</i>    | Bifunctional      | High   | 42 | 16 | 25  | 16 | 592  | 64.2  | 6.76  | 660  | 98.8  | 101   | 104.8 | 97.1  | 98.9  | 99.3  |
| Q91VC9 | <i>Ghitm</i>   | Growth            | High   | 6  | 2  | 2   | 2  | 346  | 37.3  | 9.8   | 0    | 94.9  | 91.9  | 103.6 | 102.2 | 97.5  | 109.8 |
| Q8BVE8 | <i>Nsd2</i>    | Histone-lysine N- | High   | 6  | 1  | 1   | 1  | 1365 | 152.2 | 8.51  | 41   | 91    | 101.2 | 91    | 111.6 | 98.8  | 106.4 |
| P15508 | <i>Sptb</i>    | Spectrin beta     | High   | 27 | 44 | 59  | 39 | 2128 | 245.1 | 5.33  | 915  | 98.5  | 102.9 | 96.2  | 99.7  | 99.7  | 102.9 |
| Q68ED7 | <i>Crtc1</i>   | CREB-regulated    | High   | 5  | 3  | 3   | 3  | 630  | 66.9  | 6.05  | 76   | 90.6  | 102.4 | 94    | 103.6 | 108.3 | 101   |
| Q811J3 | <i>Ireb2</i>   | Iron-responsive   | High   | 1  | 1  | 1   | 1  | 963  | 104.9 | 6.93  | 31   | 86.8  | 107.8 | 85.6  | 105.3 | 115.7 | 98.8  |
| Q9Z351 | <i>Kcnq2</i>   | Potassium         | High   | 6  | 4  | 5   | 4  | 759  | 84.4  | 9.69  | 60   | 99.7  | 101.8 | 88.7  | 101.4 | 99.5  | 108.8 |
| Q05CL8 | <i>Larp7</i>   | La-related        | Medium | 2  | 1  | 1   | 1  | 570  | 64.8  | 9.54  | 0    |       |       |       |       |       |       |
| Q8BX70 | <i>Vps13c</i>  | Vacuolar protein  | High   | 11 | 33 | 39  | 32 | 3748 | 419.8 | 6.81  | 643  | 99.4  | 100.2 | 98.5  | 97.6  | 102.8 | 101.5 |
| Q01405 | <i>Sec23a</i>  | Protein transport | High   | 28 | 17 | 23  | 15 | 765  | 86.1  | 7.08  | 417  | 99.6  | 99.9  | 102.5 | 99.9  | 97    | 101.2 |
| Q8BKZ9 | <i>Pdhx</i>    | Pyruvate          | High   | 29 | 13 | 21  | 13 | 501  | 54    | 7.75  | 444  | 95.2  | 106.7 | 92.4  | 100.9 | 102.2 | 102.6 |
| P57722 | <i>Pcbp3</i>   | Poly(rC)-binding  | High   | 27 | 8  | 20  | 2  | 371  | 39.3  | 7.52  | 373  | 96.1  | 96.5  | 101.4 | 97.1  | 110.4 | 98.6  |
| Q8BTY8 | <i>Scfd2</i>   | Sec1 family       | High   | 3  | 2  | 2   | 2  | 684  | 74.7  | 6.81  | 23   | 98.2  | 106.8 | 97.5  | 100.7 | 99.5  | 97.3  |
| A7M7C7 | <i>Skor2</i>   | SKI family        | Low    | 1  | 1  | 1   | 1  | 1008 | 105.6 | 6.67  | 0    | 109.2 | 108.6 | 80.8  | 113.2 | 89.7  | 98.4  |
| Q8VBW6 | <i>Nae1</i>    | NEDD8-            | High   | 17 | 7  | 8   | 7  | 534  | 60.2  | 5.52  | 65   | 98.2  | 101.4 | 95.7  | 101   | 101   | 102.6 |
| Q8BY89 | <i>Slc44a2</i> | Choline           | High   | 3  | 2  | 2   | 2  | 706  | 80.1  | 8.79  | 36   | 94.6  | 101.7 | 105.7 | 93    | 96.8  | 108.1 |
| Q60967 | <i>Papss1</i>  | Bifunctional 3'-  | High   | 12 | 5  | 7   | 4  | 624  | 70.7  | 6.77  | 80   | 93    | 98.3  | 97.7  | 103.6 | 96.5  | 110.9 |
| Q8CFI0 | <i>Nedd4l</i>  | E3 ubiquitin-     | High   | 21 | 16 | 21  | 14 | 1004 | 115.3 | 6.15  | 241  | 97.9  | 102.8 | 96    | 100.8 | 102.5 | 100.1 |
| Q811S7 | <i>Ubp1</i>    | Upstream-         | High   | 6  | 2  | 2   | 2  | 540  | 60.2  | 6.27  | 39   | 96.5  | 88.8  | 96.3  | 100.5 | 107.1 | 110.8 |
| Q2WF71 | <i>Lfn1</i>    | Leucine-rich      | High   | 7  | 4  | 4   | 4  | 766  | 81.9  | 7.59  | 66   | 101.7 | 106.9 | 88.5  | 96.8  | 100.7 | 105.3 |
| Q8VEJ9 | <i>Vps4a</i>   | Vacuolar protein  | High   | 32 | 12 | 17  | 9  | 437  | 48.9  | 7.8   | 255  | 99.2  | 100.1 | 99.8  | 98.6  | 101.9 | 100.6 |
| Q9D964 | <i>Gatm</i>    | Glycine           | High   | 18 | 7  | 8   | 7  | 423  | 48.3  | 7.88  | 89   | 114.6 | 98.6  | 121.9 | 86.4  | 89.2  | 89.3  |
| Q8BGB7 | <i>Enoph1</i>  | Enolase-          | High   | 16 | 4  | 8   | 4  | 257  | 28.6  | 4.92  | 179  | 95    | 99.5  | 95.7  | 102.2 | 103.4 | 104.2 |
| Q91VE0 | <i>Slc27a4</i> | Long-chain fatty  | High   | 28 | 14 | 19  | 14 | 643  | 72.3  | 8.59  | 204  | 95    | 97.1  | 91.1  | 107   | 105.3 | 104.5 |
| Q9DOB5 | <i>Tstd3</i>   | Thiosulfate       | High   | 6  | 1  | 2   | 1  | 157  | 17.3  | 8.13  | 42   |       |       |       |       |       |       |
| Q9Z0N1 | <i>Eif2s3x</i> | Eukaryotic        | High   | 36 | 14 | 19  | 14 | 472  | 51    | 8.4   | 304  | 101.8 | 101.4 | 103.8 | 97.4  | 95.7  | 99.8  |
| O08709 | <i>Prdx6</i>   | Peroxioredoxin-6  | High   | 71 | 15 | 60  | 15 | 224  | 24.9  | 6.01  | 1168 | 114.8 | 108.8 | 124.5 | 83.7  | 84.6  | 83.6  |
| Q8JZL3 | <i>Thpa</i>    | Thiamine-         | High   | 29 | 5  | 5   | 5  | 224  | 24.2  | 4.72  | 126  | 93.8  | 99.5  | 90.6  | 101.7 | 104.3 | 110.2 |
| Q8BR92 | <i>Palm2</i>   | Paralemm-2        | High   | 20 | 7  | 9   | 6  | 376  | 42.1  | 5.15  | 113  | 92.7  | 93.8  | 89.6  | 109.1 | 107.7 | 107   |
| Q3UP38 | <i>Cracr2a</i> | EF-hand           | Low    | 4  | 1  | 1   | 1  | 310  | 35.8  | 4.67  | 0    |       |       |       |       |       |       |
| P39098 | <i>Man1a2</i>  | Mannosyl-         | High   | 3  | 2  | 2   | 2  | 641  | 72.8  | 8.28  | 16   | 98.8  | 99.3  | 92    | 110.7 | 100.5 | 98.6  |
| Q9JKD3 | <i>Scamp5</i>  | Secretory         | High   | 12 | 3  | 16  | 3  | 235  | 26.1  | 8.54  | 175  | 97.4  | 96.3  | 91.3  | 103.1 | 108.8 | 103   |
| Q920A7 | <i>Afg3l1</i>  | AFG3-like         | High   | 5  | 4  | 4   | 1  | 789  | 87    | 8.85  | 63   | 90.7  | 108.3 | 87.8  | 109   | 98.8  | 105.4 |
| Q9R0Q3 | <i>Tmed2</i>   | Transmembrane     | High   | 14 | 2  | 3   | 2  | 201  | 22.7  | 5.17  | 57   | 98.8  | 104.3 | 96.2  | 100.5 | 99.3  | 101   |
| O55131 | <i>Septin7</i> | Septin-7          | High   | 49 | 22 | 59  | 21 | 436  | 50.5  | 8.57  | 843  | 97.6  | 98    | 92.7  | 104.1 | 104.1 | 103.5 |
| A2RTL5 | <i>Rsrc2</i>   | Arginine/serine-  | Medium | 2  | 1  | 1   | 1  | 376  | 43.9  | 11.46 | 36   | 89.6  | 104.1 | 119.9 | 97.6  | 93.9  | 94.9  |
| Q9JI44 | <i>Dmap1</i>   | DNA               | High   | 10 | 3  | 3   | 3  | 468  | 53.1  | 9.5   | 59   | 95.6  | 100.8 | 91.7  | 106.4 | 101.1 | 104.4 |
| Q65CL1 | <i>Ctnna3</i>  | Catenin alpha-3   | High   | 6  | 3  | 3   | 2  | 895  | 99.7  | 6.52  | 26   |       |       |       |       |       |       |
| Q80SY4 | <i>Mib1</i>    | E3 ubiquitin-     | Medium | 2  | 1  | 1   | 1  | 1006 | 110   | 6.92  | 19   | 86.2  | 97.4  | 108.3 | 104.8 | 99.2  | 104.2 |
| Q9D387 | <i>Lamp5</i>   | Lysosome-         | High   | 4  | 1  | 2   | 1  | 280  | 31.7  | 6.14  | 46   | 96.5  | 110.5 | 69.2  | 113   | 106.1 | 104.6 |
| O55143 | <i>Atp2a2</i>  | Sarcoplasmic/en   | High   | 46 | 43 | 120 | 43 | 1044 | 114.8 | 5.34  | 2728 | 95.3  | 106.7 | 89.6  | 104.8 | 101.9 | 101.6 |
| Q62092 | <i>Nsg1</i>    | Neuronal vesicle  | High   | 7  | 1  | 1   | 1  | 185  | 20.9  | 6.21  | 23   |       |       |       |       |       |       |
| Q8R0W0 | <i>Eppk1</i>   | Epiplakin         | High   | 4  | 4  | 5   | 1  | 6548 | 724.2 | 6.07  | 88   | 91.4  | 104.6 | 106.7 | 96.5  | 102.5 | 98.2  |
| Q8R4G0 | <i>Ntng1</i>   | Netrin-G1         | High   | 4  | 4  | 5   | 4  | 539  | 60.5  | 6.24  | 100  | 87.6  | 95.5  | 84.4  | 112   | 109.8 | 110.7 |
| Q9D1I6 | <i>Mrpl14</i>  | 39S ribosomal     | High   | 26 | 3  | 3   | 3  | 145  | 15.9  | 10.99 | 67   | 98.2  | 99.5  | 95.3  | 106.7 | 101   | 99.2  |
| Q8BPM0 | <i>Daam1</i>   | Disheveled-       | High   | 15 | 15 | 15  | 14 | 1077 | 123.3 | 7.46  | 126  | 94.2  | 101.1 | 93.9  | 102.9 | 103.8 | 104.1 |
| Q9QYS2 | <i>Grm3</i>    | Metabotropic      | High   | 16 | 13 | 22  | 11 | 879  | 99.1  | 7.75  | 415  | 96.4  | 106.3 | 84.9  | 108.4 | 101.2 | 102.9 |
| Q61214 | <i>Dyrk1a</i>  | Dual specificity  | High   | 9  | 7  | 8   | 7  | 763  | 85.4  | 8.75  | 96   | 99.3  | 101   | 96.3  | 104.7 | 99.7  | 99    |
| Q3ULA2 | <i>Btrc</i>    | F-box/WD          | High   | 2  | 1  | 1   | 1  | 605  | 68.9  | 7.88  | 31   | 59.3  | 56.9  | 87.5  | 105.3 | 164.4 | 126.6 |
| Q99020 | <i>Hnrnpab</i> | Heterogeneous     | High   | 36 | 9  | 15  | 8  | 285  | 30.8  | 7.91  | 338  | 105   | 99.6  | 104.6 | 100   | 95.5  | 95.4  |
| Q8R2U6 | <i>Nudt4</i>   | Diphosphoinosit   | High   | 18 | 3  | 3   | 2  | 179  | 20.1  | 6.35  | 44   | 82.3  | 99.2  | 87.7  | 89.7  | 97.4  | 143.8 |
| Q91VJ4 | <i>Stk38</i>   | Serine/threonine  | High   | 7  | 3  | 3   | 1  | 465  | 54.1  | 7.34  | 46   | 109.4 | 94.4  | 117   | 95.2  | 91.5  | 92.6  |
| Q8BSY0 | <i>Asph</i>    | Aspartyl/asparag  | High   | 8  | 4  | 4   | 4  | 741  | 83    | 5.08  | 83   | 98.3  | 100.3 | 114.7 | 96.6  | 96.2  | 94    |
| Q9DAI2 | <i>Ift22</i>   | Intraflagellar    | High   | 30 | 4  | 4   | 4  | 185  | 20.8  | 5.25  | 136  | 101.3 | 103.2 | 100.6 | 88.2  | 101.2 | 105.5 |
| P59279 | <i>Rab2b</i>   | Ras-related       | High   | 43 | 8  | 22  | 2  | 216  | 24.2  | 6.68  | 566  | 93.6  | 99.2  | 96.1  | 101.5 | 99.4  | 110.2 |
| Q99KR7 | <i>Ppif</i>    | Peptidyl-prolyl   | High   | 12 | 4  | 6   | 4  | 206  | 21.7  | 9.16  | 62   | 99.9  | 106.4 | 94.9  | 98.5  | 99.4  | 100.9 |
| Q8C5W0 | <i>Climn</i>   | Calmin OS=Mus     | High   | 5  | 4  | 6   | 4  | 1052 | 117.2 | 5.03  | 99   | 95.9  | 100   | 103.1 | 97.2  | 99.6  | 104.1 |
| P53395 | <i>Dbt</i>     | Lipoamide         | High   | 13 | 6  | 11  | 6  | 482  | 53.2  | 8.6   | 190  | 95.9  | 100.3 | 94.4  | 100.1 | 105.5 | 103.9 |

|        |                 |                   |        |    |    |    |    |      |       |       |      |       |       |       |       |       |       |
|--------|-----------------|-------------------|--------|----|----|----|----|------|-------|-------|------|-------|-------|-------|-------|-------|-------|
| Q8K2J0 | <i>Plcd3</i>    | 1-                | Medium | 1  | 1  | 1  | 1  | 785  | 88.6  | 6.83  | 0    | 93    | 96.3  | 97.6  | 96.4  | 111.1 | 105.6 |
| Q66T02 | <i>Pleckhg5</i> | Pleckstrin        | Medium | 1  | 1  | 1  | 1  | 1073 | 118.9 | 6.87  | 25   |       |       |       |       |       |       |
| P62761 | <i>Vsn1</i>     | Visinin-like      | High   | 79 | 15 | 73 | 12 | 191  | 22.1  | 5.15  | 1191 | 94.4  | 99.9  | 86.4  | 106.6 | 105.4 | 107.2 |
| Q91WK0 | <i>Lrrfip2</i>  | Leucine-rich      | High   | 9  | 3  | 5  | 3  | 415  | 47.1  | 5.68  | 135  | 97.6  | 98.8  | 98.9  | 102.7 | 102   | 100   |
| Q8K4P0 | <i>Wdr33</i>    | pre-mRNA 3'       | Low    | 1  | 1  | 1  | 1  | 1330 | 145.2 | 9.13  | 13   | 85.1  | 88.7  | 101.5 | 105   | 113.1 | 106.5 |
| P35282 | <i>Rab21</i>    | Ras-related       | High   | 46 | 8  | 11 | 8  | 222  | 24.1  | 7.94  | 253  | 97    | 102.3 | 106.4 | 97.5  | 99.9  | 97    |
| Q9D8T7 | <i>Sliip</i>    | SRA stem-loop-    | High   | 37 | 4  | 4  | 4  | 112  | 12.6  | 9.82  | 75   | 105.5 | 100.5 | 101.7 | 101.6 | 92    | 98.6  |
| Q6T3U4 | <i>Npc111</i>   | NPC1-like         | Medium | 1  | 1  | 1  | 1  | 1333 | 147   | 6.65  | 26   | 88.8  | 99.1  | 123   | 89.1  | 102.4 | 97.6  |
| O88447 | <i>Klc1</i>     | Kinesin light     | High   | 31 | 16 | 23 | 13 | 541  | 61.4  | 5.68  | 483  | 98.2  | 97.8  | 97.2  | 98.7  | 105   | 103.1 |
| Q8CI61 | <i>Bag4</i>     | BAG family        | High   | 10 | 4  | 5  | 4  | 457  | 49.1  | 5.34  | 113  | 97    | 100.2 | 98.6  | 98.9  | 92.4  | 112.9 |
| Q9JJJ7 | <i>Porcn</i>    | Protein-serine O- | Low    | 2  | 1  | 1  | 1  | 461  | 52.5  | 8.98  | 17   | 99.1  | 108.8 | 94.9  | 104.5 | 99.2  | 93.5  |
| Q5SRX1 | <i>Tom1l2</i>   | TOM1-like         | High   | 48 | 17 | 30 | 17 | 507  | 55.6  | 4.82  | 723  | 93.6  | 97    | 87.6  | 107.8 | 105.2 | 108.7 |
| Q80TM9 | <i>Nisch</i>    | Nischarin         | High   | 8  | 10 | 11 | 10 | 1593 | 174.9 | 5.16  | 128  | 100.3 | 98    | 103.2 | 99.1  | 101.2 | 98.1  |
| P47791 | <i>Gsr</i>      | Glutathione       | High   | 20 | 7  | 9  | 7  | 500  | 53.6  | 7.99  | 107  | 100   | 100.8 | 103.5 | 98.5  | 99.3  | 97.9  |
| Q8C4X2 | <i>Csnk1g3</i>  | Casein kinase I   | High   | 20 | 7  | 8  | 2  | 424  | 48.9  | 9.11  | 80   | 98    | 102.8 | 100.9 | 98.1  | 107.7 | 92.5  |
| Q62313 | <i>Tgoln1</i>   | Trans-Golgi       | Medium | 5  | 2  | 2  | 2  | 353  | 37.8  | 5.34  | 14   | 98.6  | 95.7  | 95.6  | 97.2  | 105   | 107.9 |
| Q6PFD9 | <i>Nup98</i>    | Nuclear pore      | High   | 4  | 6  | 7  | 6  | 1816 | 197.1 | 6.18  | 85   | 101.5 | 106.6 | 98.5  | 96.1  | 97.9  | 99.5  |
| Q8VC88 | <i>Gca</i>      | Grancalcin        | Medium | 5  | 1  | 1  | 1  | 220  | 24.6  | 5.07  | 22   | 95.3  | 100.9 | 99.5  | 100.7 | 94.9  | 108.7 |
| Q91VS7 | <i>Mgst1</i>    | Microsomal        | High   | 8  | 1  | 1  | 1  | 155  | 17.5  | 9.66  | 27   | 112.7 | 116.5 | 176.5 | 68.7  | 66.1  | 59.5  |
| Q8C407 | <i>Yipf4</i>    | Protein YIPF4     | Medium | 4  | 1  | 1  | 1  | 246  | 27.3  | 4.65  | 26   |       |       |       |       |       |       |
| Q08639 | <i>Tfdp1</i>    | Transcription     | Low    | 4  | 1  | 1  | 1  | 410  | 45.2  | 6.1   | 0    | 114.2 | 97.8  | 94.8  | 111.6 | 88.4  | 93.2  |
| Q3TC93 | <i>Hs1bp3</i>   | HCLS1-binding     | High   | 11 | 2  | 3  | 2  | 395  | 43.7  | 4.98  | 103  | 102.4 | 100.8 | 106.1 | 96.9  | 100.3 | 93.4  |
| Q6PDS3 | <i>Sarm1</i>    | NAD(+)            | High   | 15 | 8  | 10 | 8  | 724  | 79.6  | 6.27  | 157  | 94.8  | 101.5 | 101.6 | 97.9  | 102.9 | 101.3 |
| Q6PNC0 | <i>Dmxl1</i>    | DmX-like protein  | High   | 4  | 10 | 10 | 6  | 3013 | 335.8 | 6.42  | 112  | 98.2  | 99.8  | 101.1 | 100.3 | 99.4  | 101.2 |
| P17665 | <i>Cox7c</i>    | Cytochrome c      | High   | 29 | 2  | 6  | 2  | 63   | 7.3   | 11    | 130  | 97.5  | 99.1  | 97.9  | 107.4 | 107   | 91    |
| P50096 | <i>Impdh1</i>   | Inosine-5'-       | High   | 6  | 2  | 2  | 2  | 514  | 55.2  | 6.8   | 68   | 96.2  | 97.7  | 98.9  | 101   | 94.5  | 111.6 |
| Q5SSM3 | <i>Arhgap44</i> | Rho GTPase-       | High   | 14 | 11 | 14 | 11 | 814  | 88.9  | 6.6   | 232  | 94.6  | 96.7  | 95.1  | 104.4 | 105.5 | 103.7 |
| Q7TQI3 | <i>Otub1</i>    | Ubiquitin         | High   | 50 | 10 | 25 | 10 | 271  | 31.3  | 4.94  | 591  | 100   | 98    | 90.1  | 101.9 | 102.5 | 107.5 |
| A2ARZ3 | <i>Fsip2</i>    | Fibrous sheath-   | Low    | 0  | 1  | 1  | 1  | 6995 | 784.4 | 6.51  | 27   | 103.9 | 98.3  | 104   | 93.2  | 102.1 | 98.5  |
| Q920L1 | <i>Fads1</i>    | Acyl-CoA (8-3)-   | Medium | 2  | 1  | 1  | 1  | 447  | 52.3  | 9.29  | 0    |       |       |       |       |       |       |
| Q8K009 | <i>Aldh1l2</i>  | Mitochondrial     | High   | 10 | 8  | 11 | 3  | 923  | 101.5 | 6.29  | 175  | 95.4  | 98.2  | 101.9 | 99    | 101.1 | 104.5 |
| Q62192 | <i>Cd180</i>    | CD180 antigen     | High   | 7  | 3  | 3  | 3  | 661  | 74.3  | 5.88  | 60   | 92.3  | 113.8 | 98.8  | 97.2  | 96.2  | 101.7 |
| P56812 | <i>Pdcd5</i>    | Programmed cell   | High   | 54 | 7  | 12 | 7  | 126  | 14.3  | 5.68  | 201  | 97.9  | 97.2  | 95.2  | 95.4  | 98    | 116.3 |
| Q8VEH3 | <i>Arl8a</i>    | ADP-ribosylation  | High   | 44 | 7  | 10 | 3  | 186  | 21.4  | 7.77  | 225  | 104.1 | 94.5  | 98.6  | 95.6  | 107.5 | 99.7  |
| Q61702 | <i>Itih1</i>    | Inter-alpha-      | High   | 17 | 11 | 16 | 11 | 907  | 101   | 6.96  | 245  | 149.7 | 97.2  | 165.2 | 60.1  | 64.9  | 63.1  |
| Q8VC16 | <i>Lrrc14</i>   | Leucine-rich      | High   | 3  | 2  | 2  | 2  | 493  | 54.9  | 6.67  | 19   | 92.8  | 101.9 | 83.4  | 119.2 | 109.6 | 93    |
| Q9D5R2 | <i>Wdr20</i>    | WD repeat-        | High   | 7  | 3  | 3  | 3  | 567  | 62.7  | 8.48  | 82   | 92.1  | 103   | 96.2  | 103   | 103.7 | 102   |
| Q80TM6 | <i>R3hdm2</i>   | R3H domain-       | Medium | 1  | 1  | 1  | 1  | 1044 | 114.5 | 8.91  | 21   | 93.7  | 100.7 | 87.8  | 112.8 | 104.1 | 100.8 |
| P62911 | <i>Rpl32</i>    | 60S ribosomal     | High   | 38 | 5  | 9  | 5  | 135  | 15.9  | 11.33 | 160  | 101.1 | 97.3  | 103.9 | 108.8 | 92.8  | 96.1  |
| Q6ZPS6 | <i>Ankib1</i>   | Ankyrin repeat    | Low    | 1  | 1  | 1  | 1  | 1085 | 121.8 | 5.16  | 17   | 95.7  | 98.9  | 85.5  | 98.7  | 86.6  | 134.7 |
| A6X935 | <i>Itih4</i>    | Inter alpha-      | High   | 14 | 11 | 13 | 11 | 942  | 104.6 | 6.4   | 188  | 159.3 | 82.2  | 164.1 | 63.6  | 62.6  | 68.1  |
| Q9WUN2 | <i>Tbk1</i>     | Serine/threonine  | High   | 9  | 5  | 5  | 5  | 729  | 83.4  | 6.87  | 59   | 98.1  | 98.1  | 97.6  | 103.4 | 96.5  | 106.3 |
| Q61037 | <i>Tsc2</i>     | Tuberin OS=Mus    | High   | 2  | 3  | 3  | 3  | 1814 | 201.9 | 6.98  | 89   | 96.5  | 90.5  | 93.1  | 97.9  | 110.3 | 111.7 |
| Q64444 | <i>Ca4</i>      | Carbonic          | High   | 10 | 3  | 4  | 3  | 305  | 34.3  | 8.21  | 70   | 99    | 99.8  | 87.6  | 110.2 | 101   | 102.4 |
| P29595 | <i>Nedd8</i>    | NEDD8 OS=Mus      | High   | 28 | 3  | 6  | 3  | 81   | 9     | 7.25  | 85   | 96.8  | 101.9 | 93.5  | 102.1 | 100.2 | 105.6 |
| Q9Z2G9 | <i>Htatip2</i>  | Oxidoreductase    | Medium | 3  | 1  | 1  | 1  | 242  | 26.9  | 8.59  | 16   | 114.2 | 102.1 | 111.8 | 90.9  | 90.1  | 91    |
| Q9ESZ8 | <i>Gtf2i</i>    | General           | High   | 14 | 11 | 14 | 11 | 998  | 112.2 | 6.55  | 216  | 100.7 | 100.5 | 101.3 | 98.9  | 98.5  | 100.1 |
| Q9Z2G6 | <i>Sel1l</i>    | Protein sel-1     | High   | 5  | 2  | 2  | 2  | 790  | 88.3  | 5.57  | 61   | 92.9  | 88.2  | 95.7  | 106.8 | 109.7 | 106.7 |
| Q9DCE5 | <i>Pak1ip1</i>  | p21-activated     | High   | 6  | 1  | 1  | 1  | 382  | 42.1  | 8.47  | 56   | 82.4  | 81.3  | 146.6 | 105.5 | 90.2  | 93.9  |
| Q8VCS3 | <i>Fam20b</i>   | Glycosaminoglyc   | Medium | 2  | 1  | 1  | 1  | 409  | 46.6  | 6.95  | 0    |       |       |       |       |       |       |
| Q9RON7 | <i>Syt7</i>     | Synaptotagmin-7   | High   | 34 | 11 | 17 | 11 | 403  | 45.4  | 9.28  | 411  | 94.6  | 95.4  | 92.6  | 104   | 106.8 | 106.6 |
| P70121 | <i>Zhx1</i>     | Zinc fingers and  | Low    | 1  | 1  | 1  | 1  | 873  | 97.5  | 5.99  | 0    |       |       |       |       |       |       |
| Q6P5C5 | <i>Smug1</i>    | Single-strand     | High   | 7  | 1  | 1  | 1  | 279  | 30.6  | 6.77  | 53   | 93.5  | 91    | 96.5  | 99.5  | 101.5 | 118.1 |
| Q61627 | <i>Grid1</i>    | Glutamate         | High   | 4  | 4  | 5  | 4  | 1009 | 112.1 | 6.7   | 60   | 95.5  | 93.6  | 98    | 101.5 | 103.5 | 107.9 |
| Q9D0I9 | <i>Rars1</i>    | Arginine--tRNA    | High   | 29 | 16 | 23 | 16 | 660  | 75.6  | 7.55  | 450  | 100.6 | 101.7 | 104.2 | 96.8  | 97.9  | 98.8  |
| Q80V26 | <i>Bpnt2</i>    | Golgi-resident    | High   | 21 | 6  | 6  | 6  | 356  | 38.6  | 6.47  | 121  | 101   | 98.9  | 100.6 | 99.8  | 97.3  | 102.4 |
| P24527 | <i>Lta4h</i>    | Leukotriene A-4   | High   | 35 | 18 | 25 | 18 | 611  | 69    | 6.42  | 377  | 98.4  | 98.9  | 100   | 95.8  | 100.1 | 106.8 |
| P27548 | <i>Cd40lg</i>   | CD40 ligand       | Medium | 4  | 1  | 1  | 1  | 260  | 29.4  | 8.13  | 17   |       |       |       |       |       |       |
| Q923X4 | <i>Glx2</i>     | Glutaredoxin-2,   | High   | 12 | 1  | 1  | 1  | 156  | 17.3  | 9.95  | 47   | 91.2  | 89.7  | 92.6  | 114   | 98.4  | 114   |
| Q6PDI5 | <i>Ecpas</i>    | Proteasome        | High   | 9  | 13 | 15 | 13 | 1840 | 203.6 | 7.06  | 277  | 99.3  | 98.2  | 102.5 | 98.8  | 98.5  | 102.6 |
| Q9QY30 | <i>Abcb11</i>   | Bile salt export  | High   | 1  | 1  | 1  | 1  | 1321 | 146.7 | 7.66  | 62   | 100.7 | 95.3  | 96    | 101.1 | 108.3 | 98.6  |
| Q9JI39 | <i>Abcb10</i>   | ATP-binding       | High   | 3  | 2  | 2  | 2  | 715  | 77.1  | 9.6   | 21   | 98.3  | 105.9 | 102.6 | 95    | 99.9  | 98.4  |
| Q91XL9 | <i>Osbpl1a</i>  | Oxysterol-        | High   | 12 | 8  | 10 | 7  | 950  | 107.7 | 6.44  | 134  | 95.8  | 100.5 | 92.1  | 108.3 | 97.3  | 106.1 |
| O54990 | <i>Prom1</i>    | Prominin-1        | High   | 11 | 7  | 7  | 7  | 867  | 97.1  | 6.68  | 116  | 96.5  | 106.6 | 97.5  | 104.4 | 97.2  | 97.8  |
| Q8CJ19 | <i>Mical3</i>   | [F-actin]-        | High   | 13 | 22 | 31 | 22 | 1993 | 223.6 | 5.47  | 447  | 96.5  | 97.4  | 92    | 102.4 | 108.1 | 103.7 |
| Q8C8T8 | <i>Tsr2</i>     | Pre-rRNA-         | High   | 18 | 3  | 8  | 3  | 191  | 20.9  | 4.23  | 125  | 105.6 | 96.5  | 110.4 | 94.8  | 94.3  | 98.4  |
| Q9CQ71 | <i>Rpa3</i>     | Replication       | Low    | 13 | 1  | 1  | 1  | 121  | 13.6  | 4.84  | 0    | 99.3  | 101.1 | 106.3 | 89.1  | 104.3 | 99.9  |
| Q61327 | <i>Slc6a3</i>   | Sodium-           | High   | 2  | 2  | 3  | 1  | 619  | 68.8  | 7.21  | 50   |       |       |       |       |       |       |

|        |                 |                  |        |    |    |    |    |      |       |       |      |       |       |       |       |       |       |
|--------|-----------------|------------------|--------|----|----|----|----|------|-------|-------|------|-------|-------|-------|-------|-------|-------|
| Q8VI75 | <i>Ipo4</i>     | Importin-4       | High   | 10 | 9  | 11 | 9  | 1082 | 119.2 | 5.03  | 192  | 98.5  | 99.1  | 98.3  | 100.7 | 100   | 103.5 |
| Q9D1M4 | <i>Eef1e1</i>   | Eukaryotic       | High   | 16 | 3  | 4  | 3  | 174  | 19.8  | 8.59  | 91   | 98.4  | 99.6  | 103.9 | 98.9  | 101   | 98.3  |
| P63242 | <i>Eif5a</i>    | Eukaryotic       | High   | 66 | 9  | 16 | 4  | 154  | 16.8  | 5.24  | 232  | 102.7 | 106.6 | 97.5  | 105   | 96.1  | 92.1  |
| Q80WJ7 | <i>Mtdh</i>     | Protein LYRIC    | High   | 24 | 10 | 13 | 10 | 579  | 63.8  | 9.33  | 192  | 94.7  | 100.4 | 90.3  | 104.5 | 98.5  | 111.7 |
| P32921 | <i>Wars1</i>    | Tryptophan--     | High   | 44 | 17 | 25 | 17 | 481  | 54.3  | 6.89  | 592  | 97.4  | 101   | 105.7 | 98.8  | 98.8  | 98.3  |
| Q6PE13 | <i>Prrt3</i>    | Proline-rich     | High   | 11 | 9  | 11 | 9  | 971  | 101.2 | 7.52  | 109  | 98.6  | 103.8 | 96.9  | 100.2 | 99.1  | 101.3 |
| Q8VE19 | <i>Mios</i>     | GATOR complex    | High   | 4  | 2  | 2  | 2  | 875  | 98.3  | 6.71  | 44   | 101.6 | 98.3  | 95.7  | 100.1 | 106.9 | 97.3  |
| Q6ZQ08 | <i>Cnot1</i>    | CCR4-NOT         | High   | 10 | 20 | 21 | 20 | 2375 | 266.6 | 7.11  | 278  | 97.4  | 100.3 | 96.9  | 100.9 | 99.8  | 104.7 |
| P11589 | <i>Mup2</i>     | Major urinary    | High   | 47 | 7  | 10 | 2  | 180  | 20.7  | 5.11  | 182  | 90.7  | 93.2  | 99.1  | 102.6 | 112.5 | 101.8 |
| P97742 | <i>Cpt1a</i>    | Carnitine O-     | High   | 18 | 11 | 14 | 11 | 773  | 88.2  | 8.62  | 99   | 100.8 | 102.7 | 113.5 | 94.1  | 93.4  | 95.6  |
| Q6GQW0 | <i>Btdb11</i>   | Ankyrin repeat   | Medium | 1  | 1  | 1  | 1  | 1109 | 121.5 | 6.81  | 0    |       |       |       |       |       |       |
| Q9CX30 | <i>Yif1b</i>    | Protein YIF1B    | High   | 4  | 1  | 1  | 1  | 311  | 34    | 9.14  | 49   | 95    | 99    | 115.1 | 102.2 | 90.6  | 98    |
| Q9JJG0 | <i>Tacc2</i>    | Transferring     | High   | 5  | 5  | 5  | 3  | 1149 | 124.1 | 5.06  | 47   | 100.6 | 108.6 | 84.6  | 100.7 | 107.6 | 98    |
| Q9CZ13 | <i>Uqcrc1</i>   | Cytochrome b-c1  | High   | 39 | 16 | 51 | 16 | 480  | 52.8  | 6.21  | 1105 | 97.5  | 100.7 | 91.8  | 103.3 | 104.5 | 102.1 |
| Q77MK9 | <i>Syncrip</i>  | Heterogeneous    | High   | 37 | 20 | 32 | 20 | 623  | 69.6  | 8.59  | 620  | 96.3  | 98.2  | 99.7  | 104.3 | 102.3 | 99.2  |
| Q9Z1F9 | <i>Uba2</i>     | SUMO-activating  | High   | 27 | 13 | 17 | 13 | 638  | 70.5  | 5.24  | 336  | 104.2 | 98.6  | 98.9  | 101.1 | 99.1  | 98    |
| P55088 | <i>Aqp4</i>     | Aquaporin-4      | High   | 19 | 6  | 8  | 6  | 323  | 34.4  | 7.42  | 153  | 104.7 | 94.5  | 133.8 | 84.5  | 90.7  | 91.7  |
| P63300 | <i>Selenow</i>  | Selenoprotein W  | High   | 20 | 3  | 3  | 3  | 88   | 9.7   | 8.72  | 46   | 113.2 | 113.5 | 108.3 | 102.1 | 77.5  | 85.4  |
| Q8R0Y8 | <i>Slc25a42</i> | Mitochondrial    | High   | 8  | 2  | 3  | 2  | 318  | 35.2  | 10.05 | 63   | 100   | 109   | 102.1 | 98.8  | 93.8  | 96.3  |
| Q8R2V5 | <i>Adap2</i>    | Arf-GAP with     | High   | 4  | 1  | 1  | 1  | 381  | 44    | 9.14  | 27   |       |       |       |       |       |       |
| Q8VE09 | <i>Ttc39c</i>   | Tetrapeptide     | High   | 2  | 1  | 1  | 1  | 580  | 65.4  | 6.87  | 55   | 92.9  | 92.4  | 111   | 106.3 | 96.6  | 100.8 |
| P05132 | <i>Prkaca</i>   | cAMP-            | High   | 41 | 13 | 24 | 5  | 351  | 40.5  | 8.79  | 321  | 93.3  | 97.2  | 91.4  | 104.3 | 114.6 | 99.2  |
| Q99N95 | <i>Mrpl3</i>    | 39S ribosomal    | Medium | 3  | 1  | 1  | 1  | 348  | 39.1  | 9.55  | 25   | 100.3 | 98.5  | 102.5 | 103.3 | 105.3 | 90    |
| P54726 | <i>Rad23a</i>   | UV excision      | High   | 14 | 4  | 5  | 2  | 363  | 39.7  | 4.58  | 141  | 105.9 | 97    | 101.4 | 89.7  | 104.7 | 101.4 |
| Q9CQV7 | <i>Dnajc19</i>  | Mitochondrial    | High   | 25 | 3  | 4  | 3  | 116  | 12.4  | 10.1  | 71   | 95.2  | 103.8 | 96.5  | 102.5 | 98.6  | 103.4 |
| Q8BGZ4 | <i>Cdc23</i>    | Cell division    | High   | 9  | 5  | 6  | 5  | 597  | 68.5  | 7.18  | 75   | 102.3 | 98    | 100.4 | 100.6 | 98.5  | 100.1 |
| Q62421 | <i>Sh3gl3</i>   | Endophilin-A3    | High   | 47 | 13 | 16 | 13 | 347  | 38.9  | 5.12  | 276  | 103.1 | 99.1  | 97.9  | 98.7  | 102.7 | 98.5  |
| Q8K2B3 | <i>Sdhb</i>     | Succinate        | High   | 39 | 21 | 44 | 21 | 664  | 72.5  | 7.37  | 797  | 98    | 100.5 | 94.3  | 103.2 | 103.2 | 100.9 |
| Q6ZPU9 | <i>Kifbp</i>    | KIF-binding      | High   | 19 | 10 | 13 | 10 | 617  | 71    | 5.48  | 193  | 105.2 | 99.2  | 102.6 | 97.5  | 95.3  | 100.2 |
| Q6R0H7 | <i>Gnas</i>     | Guanine          | High   | 13 | 12 | 29 | 10 | 1133 | 121.4 | 4.81  | 547  | 97.4  | 98.3  | 100.4 | 100.2 | 96.1  | 107.6 |
| P32848 | <i>Pvalb</i>    | Parvalbumin      | High   | 70 | 9  | 18 | 9  | 110  | 11.9  | 5.19  | 339  | 103   | 119.8 | 81    | 106.3 | 97.8  | 92.1  |
| Q8BZN6 | <i>Dock10</i>   | Dedicator of     | High   | 1  | 1  | 1  | 1  | 2150 | 245.6 | 7.05  | 25   | 99.8  | 99.6  | 89.7  | 105.7 | 94.8  | 110.5 |
| P50571 | <i>Gabbr1</i>   | Gamma-           | High   | 19 | 8  | 16 | 2  | 474  | 54.1  | 8.78  | 330  | 97.3  | 101.1 | 83.4  | 101.8 | 104.5 | 111.9 |
| Q9CRD0 | <i>Ociad1</i>   | OCIA domain-     | High   | 37 | 7  | 7  | 7  | 247  | 27.6  | 7.81  | 96   | 99.1  | 99    | 101   | 100.7 | 101   | 99.2  |
| Q9D173 | <i>Tomm7</i>    | Mitochondrial    | High   | 31 | 1  | 6  | 1  | 55   | 6.2   | 10.17 | 60   | 90.8  | 89.2  | 93.7  | 116.3 | 97.8  | 112.1 |
| P62311 | <i>Lsm3</i>     | U6 snRNA-        | High   | 20 | 2  | 2  | 2  | 102  | 11.8  | 4.7   | 0    | 101.4 | 104.7 | 103.1 | 90.1  | 99.2  | 101.5 |
| P49817 | <i>Cav1</i>     | Caveolin-1       | High   | 20 | 2  | 3  | 2  | 178  | 20.5  | 6.02  | 63   | 103.8 | 93.1  | 110.3 | 87.3  | 102   | 103.4 |
| Q9WVR4 | <i>Fxr2</i>     | Fragile X mental | High   | 9  | 5  | 5  | 4  | 673  | 73.7  | 6.23  | 86   | 94.9  | 101.5 | 97.8  | 108.6 | 97.5  | 99.7  |
| P10404 |                 | MLV-related      | Medium | 3  | 1  | 1  | 1  | 641  | 69.6  | 7.96  | 0    |       |       |       |       |       |       |
| P97352 | <i>S100a13</i>  | Protein S100-    | High   | 37 | 5  | 5  | 5  | 98   | 11.2  | 6.13  | 75   | 119.8 | 105.5 | 128.6 | 80.6  | 80.7  | 84.8  |
| Q9CW03 | <i>Smc3</i>     | Structural       | High   | 8  | 8  | 8  | 8  | 1217 | 141.5 | 7.18  | 121  | 104.2 | 100.7 | 106.2 | 95.2  | 95.3  | 98.4  |
| Q91WL8 | <i>Wwox</i>     | WW domain-       | High   | 6  | 2  | 2  | 2  | 414  | 46.5  | 7.02  | 25   |       |       |       |       |       |       |
| Q8BI72 | <i>Cdkn2aip</i> | CDKN2A-          | High   | 8  | 4  | 5  | 4  | 563  | 59.7  | 9.16  | 93   | 95    | 98.4  | 100.3 | 102.5 | 96.3  | 107.5 |
| P34022 | <i>Ranbp1</i>   | Ran-specific     | High   | 40 | 6  | 11 | 6  | 203  | 23.6  | 5.22  | 152  | 97.9  | 96.9  | 100.7 | 100.9 | 102.3 | 101.3 |
| Q8BW75 | <i>Maob</i>     | Amine oxidase    | High   | 27 | 11 | 15 | 10 | 520  | 58.5  | 8.29  | 290  | 96.8  | 107.9 | 101   | 97    | 97.3  | 100   |
| Q9CYR6 | <i>Pgm3</i>     | Phosphoacetylgl  | High   | 8  | 4  | 5  | 4  | 542  | 59.4  | 6.2   | 90   | 104.4 | 104.3 | 99.5  | 91.4  | 99.3  | 101.1 |
| O35551 | <i>Rabep1</i>   | Rab GTPase-      | High   | 26 | 19 | 24 | 19 | 862  | 99.5  | 5.01  | 426  | 97.6  | 100.9 | 92.4  | 104.3 | 100.8 | 104.1 |
| Q6DFV3 | <i>Arhgap21</i> | Rho GTPase-      | High   | 6  | 10 | 12 | 10 | 1944 | 215.6 | 7.64  | 123  | 97    | 101.5 | 93.9  | 103.2 | 105.5 | 98.8  |
| Q8BTX9 | <i>Hsd11</i>    | Inactive         | High   | 30 | 8  | 11 | 8  | 330  | 36.8  | 8.48  | 246  | 103.8 | 97.3  | 100.8 | 97.2  | 101.6 | 99.3  |
| Q64253 | <i>Ly6e</i>     | Lymphocyte       | High   | 10 | 1  | 1  | 1  | 136  | 14.4  | 7.05  | 32   | 81    | 106   | 105.6 | 100.9 | 89.6  | 116.9 |
| Q91W43 | <i>Gldc</i>     | Glycine          | High   | 9  | 7  | 7  | 7  | 1025 | 113.2 | 7.56  | 115  | 94.3  | 96.8  | 105.9 | 101   | 102.1 | 99.9  |
| Q8BH16 | <i>Fbx2</i>     | F-box/LRR-       | Medium | 3  | 1  | 1  | 1  | 423  | 46.9  | 7.43  | 14   |       |       |       |       |       |       |
| Q8CHK3 | <i>Mboat7</i>   | Lysophospholipi  | High   | 12 | 3  | 3  | 3  | 473  | 53.4  | 8.69  | 90   | 102.5 | 90.6  | 93.6  | 102.4 | 105.3 | 105.6 |
| Q80T41 | <i>Gabbr2</i>   | Gamma-           | High   | 10 | 9  | 14 | 9  | 940  | 105.6 | 8.72  | 260  | 99.7  | 94.5  | 90.5  | 110.4 | 98.8  | 106.2 |
| P24549 | <i>Aldh1a1</i>  | Retinal          | High   | 39 | 16 | 24 | 15 | 501  | 54.4  | 7.8   | 425  | 89.1  | 104   | 90.2  | 99.1  | 109.2 | 108.4 |
| Q80U72 | <i>Scrib</i>    | Protein scribble | High   | 3  | 3  | 4  | 3  | 1612 | 174   | 5.12  | 141  | 96.7  | 100.5 | 100.9 | 94.3  | 106.8 | 100.9 |
| Q7TPH6 | <i>Mycbp2</i>   | E3 ubiquitin-    | High   | 2  | 8  | 8  | 8  | 4749 | 520.9 | 7.09  | 55   | 99.6  | 94.5  | 99.6  | 96    | 100.2 | 110.1 |
| B0V2N1 | <i>Ptprs</i>    | Receptor-type    | High   | 19 | 23 | 39 | 16 | 1907 | 211.8 | 7.23  | 638  | 95.6  | 96.4  | 95.3  | 106.3 | 101.2 | 105.2 |
| Q8BXC6 | <i>Comm2</i>    | COMM domain-     | Medium | 4  | 1  | 1  | 1  | 199  | 22.8  | 6.62  | 36   | 99.9  | 106.8 | 98.8  | 94.1  | 99.9  | 100.4 |
| Q64433 | <i>Hspe1</i>    | 10 kDa heat      | High   | 75 | 8  | 24 | 8  | 102  | 11    | 8.35  | 412  | 96.8  | 102.2 | 92.7  | 101.4 | 105.3 | 101.6 |
| Q9Z2W8 | <i>Gria4</i>    | Glutamate        | High   | 15 | 11 | 20 | 3  | 902  | 100.8 | 8.07  | 376  | 96.5  | 101.9 | 91.9  | 106.2 | 100.3 | 103.1 |
| Q9CY50 | <i>Ssr1</i>     | Translocon-      | High   | 9  | 2  | 4  | 2  | 286  | 32    | 4.45  | 115  | 104.3 | 103.4 | 111   | 97    | 92.8  | 91.5  |
| Q0P5W1 | <i>Vps8</i>     | Vacuolar protein | High   | 7  | 8  | 8  | 8  | 1427 | 161   | 5.58  | 143  | 95.5  | 100.5 | 94.8  | 105.8 | 102.7 | 100.8 |
| Q8VD26 | <i>Tmem143</i>  | Transmembrane    | High   | 7  | 3  | 3  | 3  | 458  | 51.6  | 9.26  | 24   | 102.9 | 97.4  | 99.6  | 103.2 | 101.7 | 95.4  |
| Q501J2 | <i>Antkmt</i>   | Adenine          | Medium | 8  | 1  | 1  | 1  | 229  | 24.7  | 8.6   | 15   |       |       |       |       |       |       |
| P20918 | <i>Plg</i>      | Plasminogen      | High   | 13 | 10 | 14 | 10 | 812  | 90.7  | 6.6   | 213  | 163.7 | 71.5  | 192.6 | 53.6  | 59.2  | 59.4  |
| Q6PDJ6 | <i>Fbxo42</i>   | F-box only       | Medium | 2  | 1  | 1  | 1  | 717  | 77.7  | 7.58  | 18   |       |       |       |       |       |       |
| B1AZI6 | <i>Thoc2</i>    | THO complex      | High   | 1  | 1  | 1  | 1  | 1594 | 182.7 | 8.44  | 39   | 93.3  | 98.9  | 114.4 | 86.9  | 101.7 | 104.9 |

|        |                  |                   |        |    |    |    |    |      |       |       |      |       |       |       |       |       |       |
|--------|------------------|-------------------|--------|----|----|----|----|------|-------|-------|------|-------|-------|-------|-------|-------|-------|
| Q3U0K8 | <i>Ogfod1</i>    | Prolyl 3-         | High   | 6  | 3  | 3  | 3  | 545  | 62.7  | 4.91  | 63   | 97.2  | 89    | 100   | 103.2 | 102.7 | 107.9 |
| Q91Z38 | <i>Ttc1</i>      | Tetrapeptide      | High   | 20 | 5  | 5  | 5  | 292  | 33.2  | 5.01  | 52   | 102.2 | 101.2 | 101.5 | 96.7  | 98.9  | 99.5  |
| Q9D8W7 | <i>Ociad2</i>    | OClA domain-      | High   | 31 | 5  | 8  | 5  | 154  | 16.9  | 9.41  | 120  | 93    | 104.7 | 92.4  | 105.6 | 93.1  | 111.2 |
| Q9CRB8 | <i>Mtfp1</i>     | Mitochondrial     | High   | 21 | 3  | 5  | 3  | 166  | 18.3  | 8.68  | 109  | 98.1  | 96.5  | 101.8 | 102.2 | 104.3 | 97.1  |
| P62077 | <i>Timm8b</i>    | Mitochondrial     | High   | 22 | 2  | 2  | 2  | 83   | 9.3   | 5.12  | 53   | 94.1  | 102   | 93    | 100.9 | 104.7 | 105.4 |
| Q91XB0 | <i>Trex1</i>     | Three-prime       | High   | 6  | 1  | 1  | 1  | 314  | 33.7  | 7.99  | 42   | 116.3 | 112.8 | 122   | 81.2  | 81.3  | 86.4  |
| Q9CX86 | <i>Hnrnpa0</i>   | Heterogeneous     | High   | 38 | 10 | 17 | 8  | 305  | 30.5  | 9.31  | 258  | 95.9  | 96.3  | 100.4 | 104.1 | 103.5 | 99.8  |
| Q9CR09 | <i>Ufc1</i>      | Ubiquitin-fold    | High   | 11 | 2  | 3  | 2  | 167  | 19.5  | 7.4   | 30   |       |       |       |       |       |       |
| Q64726 | <i>Azgp1</i>     | Zinc-alpha-2-     | High   | 10 | 2  | 2  | 2  | 307  | 35.3  | 6.18  | 27   |       |       |       |       |       |       |
| Q8R349 | <i>Cdc16</i>     | Cell division     | High   | 14 | 7  | 8  | 7  | 620  | 71.4  | 5.76  | 128  | 101.7 | 98    | 105.5 | 98.6  | 99.4  | 96.8  |
| Q3TYD6 | <i>Lmtk2</i>     | Serine/threonine  | High   | 6  | 6  | 8  | 6  | 1471 | 160.4 | 4.51  | 73   | 101.5 | 96.4  | 84.6  | 105.7 | 107   | 104.8 |
| Q8BHE3 | <i>Atcay</i>     | Caytaxin          | High   | 12 | 3  | 5  | 3  | 372  | 42.2  | 4.68  | 61   | 97.2  | 93.9  | 103.9 | 100.5 | 97.6  | 106.9 |
| P83887 | <i>Tubg1</i>     | Tubulin gamma-    | High   | 8  | 3  | 3  | 3  | 451  | 51.1  | 6.02  | 57   | 99.4  | 101.8 | 98.4  | 101.5 | 97.7  | 101.1 |
| P68433 | <i>H3c1</i>      | Histone H3.1      | High   | 27 | 6  | 15 | 2  | 136  | 15.4  | 11.12 | 158  | 117.4 | 96.5  | 157   | 73.5  | 79.1  | 76.6  |
| Q7TPB0 | <i>Plppr3</i>    | Phospholipid      | High   | 2  | 1  | 1  | 1  | 716  | 76.6  | 6.01  | 31   | 97.8  | 95.9  | 85.1  | 103.8 | 109.6 | 107.7 |
| Q9QZS3 | <i>Numb</i>      | Protein numb      | High   | 6  | 5  | 5  | 2  | 653  | 70.8  | 8.65  | 67   | 100.3 | 109.9 | 91.8  | 104.5 | 97.6  | 95.9  |
| Q9QUJ7 | <i>Acs14</i>     | Long-chain-fatty- | High   | 9  | 5  | 6  | 4  | 711  | 79    | 8.28  | 61   | 97.7  | 94.4  | 101.9 | 96.6  | 100.7 | 108.8 |
| Q925T6 | <i>Grip1</i>     | Glutamate         | High   | 3  | 4  | 4  | 4  | 1127 | 122   | 6.55  | 53   | 97.7  | 102.3 | 91.4  | 100.6 | 102.5 | 105.6 |
| Q80U95 | <i>Ube3c</i>     | Ubiquitin-protein | High   | 7  | 6  | 6  | 6  | 1083 | 123.9 | 6.39  | 98   | 99.6  | 98.8  | 93.2  | 100.2 | 105.8 | 102.5 |
| Q3UHB8 | <i>Ccdc177</i>   | Coiled-coil       | High   | 17 | 10 | 10 | 10 | 706  | 79.8  | 10.8  | 56   | 93.9  | 99.3  | 94    | 100.8 | 106.2 | 105.7 |
| Q8R0G7 | <i>Spsn1</i>     | Protein spinster  | High   | 5  | 2  | 2  | 2  | 528  | 56.7  | 7.15  | 13   | 99.9  | 94    | 93.2  | 102.9 | 107   | 103   |
| Q9Z1R4 | <i>D17h0s53e</i> | Uncharacterized   | High   | 6  | 2  | 2  | 2  | 293  | 32    | 6.89  | 0    | 94.9  | 104   | 106.6 | 101.3 | 91.6  | 101.6 |
| P16951 | <i>Atf2</i>      | Cyclic AMP-       | Medium | 3  | 1  | 1  | 1  | 487  | 52.3  | 7.23  | 17   |       |       |       |       |       |       |
| Q06770 | <i>Serpina6</i>  | Corticosteroid-   | High   | 8  | 2  | 2  | 2  | 397  | 44.7  | 5.24  | 36   | 121.2 | 78.5  | 163.8 | 74.2  | 87.6  | 74.7  |
| Q9CT10 | <i>Ranbp3</i>    | Ran-binding       | High   | 19 | 7  | 9  | 7  | 491  | 52.5  | 5.12  | 123  | 99.3  | 97.9  | 96.7  | 97.5  | 105.6 | 103   |
| Q61578 | <i>Fdxr</i>      | NADPH:adrenod     | High   | 14 | 5  | 5  | 5  | 494  | 54.2  | 8.66  | 69   | 96.2  | 102.2 | 94.4  | 99.4  | 103.5 | 104.2 |
| Q9CPR5 | <i>Mrpl15</i>    | 39S ribosomal     | Medium | 3  | 1  | 1  | 1  | 295  | 33.5  | 10.07 | 20   |       |       |       |       |       |       |
| Q3UVX5 | <i>Grm5</i>      | Metabotropic      | High   | 17 | 18 | 20 | 17 | 1203 | 131.8 | 7.84  | 357  | 96.1  | 94.9  | 100   | 102   | 103.7 | 103.2 |
| P55065 | <i>Pltp</i>      | Phospholipid      | High   | 9  | 3  | 3  | 3  | 493  | 54.4  | 6.62  | 49   | 133.6 | 87.2  | 132.2 | 89.1  | 72.4  | 85.6  |
| Q9QWY8 | <i>Asap1</i>     | Arf-GAP with      | High   | 20 | 20 | 25 | 20 | 1147 | 127.3 | 7.64  | 385  | 92.5  | 100.1 | 87.4  | 108   | 104.9 | 107.2 |
| P50396 | <i>Gdi1</i>      | Rab GDP           | High   | 68 | 27 | 94 | 21 | 447  | 50.5  | 5.08  | 1616 | 96.3  | 95.9  | 94.7  | 100.6 | 107.7 | 104.8 |
| Q8BKX1 | <i>Baiap2</i>    | Brain-specific    | High   | 55 | 24 | 48 | 24 | 535  | 59.2  | 9.04  | 970  | 95.8  | 100.8 | 92.7  | 105.1 | 99.1  | 106.6 |
| P06800 | <i>Ptprc</i>     | Receptor-type     | High   | 2  | 2  | 3  | 2  | 1293 | 144.7 | 5.94  | 35   | 119.8 | 103   | 151.5 | 72.9  | 77.5  | 75.4  |
| Q55057 | <i>Pde6d</i>     | Retinal rod       | High   | 16 | 2  | 2  | 2  | 150  | 17.3  | 5.67  | 39   | 92.7  | 97    | 100.9 | 98.5  | 98.6  | 112.4 |
| Q8R5L3 | <i>Vps39</i>     | Vam6/Vps39-like   | High   | 7  | 5  | 6  | 5  | 886  | 101.6 | 6.99  | 77   | 96.1  | 99.2  | 96.3  | 94.3  | 103.2 | 110.9 |
| P21550 | <i>Eno3</i>      | Beta-enolase      | High   | 17 | 6  | 49 | 1  | 434  | 47    | 7.18  | 1406 | 96.7  | 110.1 | 107.2 | 90.4  | 89.1  | 106.5 |
| A2APY7 | <i>Ndufaf5</i>   | Arginine-         | High   | 10 | 3  | 3  | 3  | 343  | 38.4  | 6.1   | 59   | 96    | 98.3  | 97    | 104.3 | 97.6  | 106.8 |
| Q9DCM0 | <i>Ethe1</i>     | Persulfide        | Medium | 4  | 1  | 1  | 1  | 254  | 27.7  | 7.23  | 18   | 102.6 | 108.9 | 98.4  | 92.1  | 98.2  | 99.8  |
| O70439 | <i>Stx7</i>      | Syntaxin-7        | High   | 34 | 6  | 8  | 6  | 261  | 29.8  | 5.78  | 196  | 97.5  | 93.5  | 101.8 | 102.4 | 105.1 | 99.6  |
| Q3UMF9 | <i>Faxc</i>      | Failed axon       | High   | 3  | 1  | 1  | 1  | 409  | 46.8  | 5.49  | 35   | 95.3  | 100.9 | 97.4  | 110.9 | 102.5 | 92.9  |
| Q9ET30 | <i>Tm9sf3</i>    | Transmembrane     | High   | 3  | 2  | 2  | 2  | 587  | 67.5  | 7.21  | 26   | 107.6 | 96.4  | 112.5 | 93.8  | 99.5  | 90.2  |
| P21995 | <i>Emb</i>       | Embigin           | High   | 17 | 5  | 5  | 4  | 330  | 37    | 6.02  | 29   | 100.6 | 100.8 | 97    | 101.4 | 100.8 | 99.4  |
| P52623 | <i>Uck1</i>      | Uridine-cytidine  | High   | 8  | 2  | 2  | 2  | 277  | 31    | 7.88  | 46   | 121.9 | 89.9  | 130.2 | 85.3  | 82.9  | 89.8  |
| P15379 | <i>Cd44</i>      | CD44 antigen      | High   | 4  | 3  | 4  | 3  | 778  | 85.6  | 4.96  | 81   | 138.4 | 95.9  | 201.3 | 48.3  | 55.8  | 60.3  |
| Q8BLR2 | <i>Cpne4</i>     | Copine-4          | High   | 21 | 9  | 12 | 8  | 557  | 62.4  | 6.33  | 210  | 94.4  | 90.2  | 105.1 | 104   | 103.9 | 102.4 |
| B1AY13 | <i>Usp24</i>     | Ubiquitin         | High   | 3  | 7  | 8  | 7  | 2617 | 293.8 | 6.19  | 158  | 101.4 | 99.9  | 96.7  | 103.2 | 100.7 | 98.1  |
| Q9Z0H8 | <i>Clip2</i>     | CAP-Gly           | High   | 34 | 33 | 43 | 27 | 1047 | 115.8 | 6.48  | 754  | 97.3  | 99.2  | 92.8  | 104.8 | 104.5 | 101.3 |
| A2AHC3 | <i>Camsap1</i>   | Calmodulin-       | High   | 5  | 6  | 6  | 6  | 1581 | 175.8 | 6.95  | 73   | 95.6  | 100.3 | 95.6  | 107.1 | 105.4 | 96    |
| P29699 | <i>Ahsg</i>      | Alpha-2-HS-       | High   | 31 | 6  | 7  | 6  | 345  | 37.3  | 6.51  | 152  | 147   | 73    | 194.7 | 59    | 62.6  | 63.8  |
| Q9Z1X2 | <i>Ptdss2</i>    | Phosphatidylseri  | Low    | 3  | 1  | 1  | 1  | 473  | 55    | 7.09  | 0    |       |       |       |       |       |       |
| Q80U62 | <i>Rubcn</i>     | Run domain        | Low    | 1  | 1  | 1  | 1  | 956  | 106.8 | 5.95  | 13   |       |       |       |       |       |       |
| Q3UV17 | <i>Krt76</i>     | Keratin, type II  | High   | 5  | 4  | 7  | 1  | 594  | 62.8  | 8.43  | 105  | 83.1  | 114.9 | 89.7  | 124.3 | 78.8  | 109.2 |
| Q9CQ45 | <i>Nenf</i>      | Neudesin          | High   | 11 | 2  | 2  | 2  | 171  | 18.9  | 5.27  | 58   | 104   | 97.9  | 97    | 104.7 | 102.5 | 93.9  |
| Q9JMA1 | <i>Usp14</i>     | Ubiquitin         | High   | 34 | 16 | 23 | 16 | 493  | 56    | 5.24  | 431  | 96.7  | 98.2  | 96.6  | 103.7 | 102.2 | 102.7 |
| Q8K2F8 | <i>Lsm14a</i>    | Protein LSM14     | High   | 8  | 3  | 4  | 3  | 462  | 50.5  | 9.52  | 43   | 99.2  | 92.8  | 94.9  | 103.7 | 103.3 | 106   |
| Q8BG95 | <i>Ppp1r12b</i>  | Protein           | High   | 10 | 7  | 9  | 6  | 976  | 109   | 5.74  | 100  | 101.2 | 95    | 92.7  | 105.2 | 95.9  | 110   |
| P62257 | <i>Ube2h</i>     | Ubiquitin-        | High   | 21 | 3  | 4  | 3  | 183  | 20.6  | 4.67  | 88   | 95.8  | 102.4 | 97.6  | 98.9  | 100.1 | 105.3 |
| Q9DBG7 | <i>Srpra</i>     | Signal            | High   | 10 | 5  | 6  | 5  | 636  | 69.6  | 8.95  | 47   | 99.4  | 104.6 | 104.5 | 98.4  | 94.1  | 99    |
| Q80X73 | <i>Pelo</i>      | Protein pelota    | High   | 8  | 2  | 3  | 2  | 385  | 43.3  | 5.99  | 101  | 90.4  | 95.9  | 95.1  | 94    | 114.4 | 110.2 |
| O09117 | <i>Syp1</i>      | Synaptophysin-    | High   | 3  | 1  | 1  | 1  | 261  | 28.9  | 8.79  | 33   |       |       |       |       |       |       |
| P58069 | <i>Rasa2</i>     | Ras GTPase-       | High   | 7  | 4  | 4  | 3  | 847  | 96.3  | 7.59  | 73   | 93.1  | 94    | 98.5  | 100.3 | 104.3 | 109.8 |
| Q35459 | <i>Ech1</i>      | Delta(3,5)-       | High   | 17 | 5  | 6  | 5  | 327  | 36.1  | 7.71  | 87   | 100.5 | 103.2 | 106.5 | 97.3  | 96.7  | 95.8  |
| Q9R0N0 | <i>Galk1</i>     | Galactokinase     | High   | 13 | 4  | 7  | 4  | 392  | 42.3  | 5.26  | 107  | 102.5 | 100.7 | 105.1 | 96.5  | 96.6  | 98.6  |
| P07934 | <i>Phkg1</i>     | Phosphorylase b   | High   | 4  | 2  | 2  | 2  | 388  | 44.9  | 6.55  | 38   | 98.5  | 100.7 | 106.1 | 102.3 | 99    | 93.3  |
| Q35864 | <i>Cops5</i>     | COP9              | High   | 32 | 7  | 10 | 7  | 334  | 37.5  | 6.54  | 154  | 98.9  | 99.7  | 107   | 96.6  | 100.3 | 97.5  |
| Q80YA9 | <i>Cnksr2</i>    | Connector         | High   | 23 | 17 | 24 | 17 | 1032 | 117.3 | 6.79  | 326  | 98.3  | 98.2  | 92.7  | 107.7 | 101.1 | 102.1 |
| Q9CWX2 | <i>Ndufaf1</i>   | Complex I         | Medium | 3  | 1  | 1  | 1  | 328  | 37.8  | 8.6   | 29   | 101.6 | 101.3 | 94.9  | 98    | 113   | 91.2  |
| Q8VHK5 | <i>Mlc1</i>      | Membrane          | High   | 16 | 4  | 5  | 4  | 382  | 41.6  | 7.9   | 89   | 101.5 | 103   | 111.7 | 93.5  | 102   | 88.4  |

|        |                  |                   |        |    |    |     |    |      |       |       |      |       |       |       |       |       |       |
|--------|------------------|-------------------|--------|----|----|-----|----|------|-------|-------|------|-------|-------|-------|-------|-------|-------|
| Q8BMB0 | <i>Emsy</i>      | BRCA2-            | Low    | 2  | 1  | 1   | 1  | 1264 | 135.2 | 9.38  | 0    | 85.7  | 83.9  | 96.8  | 105.4 | 127.1 | 101.1 |
| Q8CGC7 | <i>Eprs1</i>     | Bifunctional      | High   | 31 | 37 | 48  | 37 | 1512 | 170   | 7.66  | 829  | 102   | 99.9  | 104   | 97.2  | 99.3  | 97.7  |
| P63017 | <i>Hspa8</i>     | Heat shock        | High   | 67 | 39 | 243 | 26 | 646  | 70.8  | 5.52  | 4247 | 98    | 101.8 | 96.1  | 101.3 | 101.9 | 100.9 |
| Q6RHR9 | <i>Magi1</i>     | Membrane-         | High   | 15 | 15 | 17  | 15 | 1471 | 161.9 | 7.36  | 294  | 96.2  | 98.6  | 94.1  | 104.3 | 103.2 | 103.5 |
| Q64133 | <i>Maoa</i>      | Amine oxidase     | High   | 32 | 15 | 23  | 14 | 526  | 59.6  | 7.81  | 420  | 97.6  | 102.9 | 95.7  | 103.1 | 102.5 | 98.3  |
| Q6GQT9 | <i>Nomo1</i>     | Nodal modulator   | High   | 20 | 19 | 23  | 19 | 1214 | 133.3 | 6.09  | 315  | 94.8  | 103.4 | 99.1  | 98.6  | 100   | 104.1 |
| Q80U58 | <i>Pum2</i>      | Pumilio homolog   | High   | 4  | 4  | 4   | 1  | 1066 | 114.2 | 7.08  | 63   | 95.1  | 98.3  | 106.6 | 107.7 | 95.5  | 96.8  |
| Q9WV80 | <i>Snx1</i>      | Sorting nexin-1   | High   | 30 | 14 | 22  | 12 | 522  | 58.9  | 5.22  | 331  | 103.8 | 100.6 | 106.1 | 96.7  | 96.4  | 96.4  |
| Q00623 | <i>Apoa1</i>     | Apolipoprotein    | High   | 64 | 17 | 38  | 17 | 264  | 30.6  | 5.73  | 382  | 194.5 | 53    | 230.8 | 38.1  | 41    | 42.6  |
| Q64336 | <i>Tbr1</i>      | T-box brain       | High   | 7  | 4  | 4   | 4  | 681  | 73.9  | 7.33  | 76   | 97.8  | 94.2  | 86.3  | 110.9 | 103.8 | 107   |
| Q9CQL5 | <i>Mrpl18</i>    | 39S ribosomal     | High   | 5  | 1  | 1   | 1  | 180  | 20.7  | 9.28  | 43   | 94.3  | 99.1  | 90.1  | 103.2 | 108.6 | 104.7 |
| Q61107 | <i>Gbp4</i>      | Guanylate-        | High   | 10 | 6  | 6   | 6  | 620  | 70.8  | 6.64  | 98   | 110   | 121.4 | 165.8 | 68.8  | 64.8  | 69.2  |
| P22933 | <i>Gabrd</i>     | Gamma-            | High   | 8  | 3  | 5   | 3  | 449  | 50.5  | 7.85  | 40   | 93.5  | 105   | 91.1  | 105.6 | 99.6  | 105.2 |
| Q9D6K5 | <i>Synj2bp</i>   | Synaptotjanin-2-  | High   | 50 | 5  | 7   | 5  | 145  | 15.8  | 6.3   | 76   | 97.1  | 100.7 | 103.3 | 101.3 | 96.5  | 101.2 |
| Q80X50 | <i>Ubap2l</i>    | Ubiquitin-        | High   | 11 | 7  | 10  | 7  | 1107 | 116.7 | 7.11  | 200  | 91.6  | 97.2  | 96.5  | 106.2 | 106.8 | 101.7 |
| Q9QY81 | <i>Nup210</i>    | Nuclear pore      | High   | 7  | 11 | 12  | 11 | 1886 | 204   | 6.65  | 148  | 98.5  | 97.5  | 101.1 | 97    | 102   | 103.9 |
| Q8BGV8 | <i>Mief1</i>     | Mitochondrial     | Medium | 2  | 1  | 1   | 1  | 463  | 51.2  | 7.88  | 16   | 92.1  | 84.1  | 99.9  | 108.4 | 109.9 | 105.6 |
| Q0VBV9 | <i>Plpp4</i>     | Phospholipid      | Medium | 4  | 1  | 1   | 1  | 271  | 30.4  | 8.32  | 24   |       |       |       |       |       |       |
| Q62419 | <i>Sh3gl1</i>    | Endophilin-A2     | High   | 45 | 17 | 31  | 12 | 368  | 41.5  | 5.72  | 465  | 97.4  | 95.4  | 96.3  | 104.2 | 102   | 104.8 |
| Q8R326 | <i>Pspc1</i>     | Paraspeckle       | High   | 16 | 8  | 12  | 7  | 523  | 58.7  | 6.67  | 269  | 94.8  | 95.4  | 93    | 107.1 | 106.2 | 103.5 |
| O88735 | <i>Map7</i>      | Enscosin          | High   | 3  | 2  | 3   | 2  | 730  | 82    | 9.36  | 35   | 95.7  | 94    | 98    | 102.2 | 108.5 | 101.7 |
| Q62393 | <i>Tpd52</i>     | Tumor protein     | High   | 28 | 6  | 11  | 6  | 224  | 24.3  | 4.72  | 231  | 105.4 | 101.9 | 107.3 | 97.3  | 93.2  | 94.9  |
| Q9WVH9 | <i>Fbln5</i>     | Fibulin-5         | Low    | 2  | 1  | 1   | 1  | 448  | 50.2  | 4.7   | 24   | 115.3 | 96.2  | 110.4 | 77.6  | 93.4  | 107.1 |
| Q8CFE6 | <i>Slc38a2</i>   | Sodium-coupled    | High   | 3  | 2  | 2   | 2  | 504  | 55.5  | 7.94  | 26   | 94    | 115.7 | 85.9  | 99.4  | 100.8 | 104.2 |
| P55012 | <i>Slc12a2</i>   | Solute carrier    | High   | 15 | 15 | 20  | 15 | 1205 | 131   | 7.33  | 299  | 95.6  | 106.6 | 104.8 | 97.2  | 98.8  | 97.1  |
| Q61474 | <i>Msi1</i>      | RNA-binding       | High   | 10 | 3  | 3   | 2  | 362  | 39.1  | 7.87  | 50   |       |       |       |       |       |       |
| Q8K2C7 | <i>Os9</i>       | Protein OS-9      | High   | 3  | 2  | 2   | 2  | 672  | 76.1  | 4.84  | 32   |       |       |       |       |       |       |
| Q8BP27 | <i>Sfr1</i>      | Swi5-dependent    | High   | 3  | 1  | 1   | 1  | 319  | 35.2  | 5.15  | 33   |       |       |       |       |       |       |
| Q8CC21 | <i>Ttc19</i>     | Tetratricopeptide | High   | 10 | 4  | 6   | 4  | 365  | 41.2  | 6.21  | 82   | 97.1  | 97.5  | 94.1  | 105.3 | 104.9 | 101.1 |
| Q8BLV3 | <i>Slc9a7</i>    | Sodium/hydroge    | High   | 4  | 3  | 3   | 3  | 726  | 80.2  | 6.4   | 45   | 95.1  | 91.8  | 97.2  | 109   | 97.2  | 109.7 |
| P51125 | <i>Cast</i>      | Calpastatin       | High   | 7  | 3  | 3   | 3  | 788  | 84.9  | 5.52  | 69   | 96.1  | 103.9 | 101   | 98.3  | 91    | 109.6 |
| Q99JX4 | <i>Eif3m</i>     | Eukaryotic        | High   | 29 | 8  | 11  | 8  | 374  | 42.5  | 5.74  | 311  | 96    | 97.6  | 105   | 98.3  | 92.8  | 110.3 |
| Q9D1Q6 | <i>Erp44</i>     | Endoplasmic       | High   | 33 | 11 | 15  | 10 | 406  | 46.8  | 5.27  | 203  | 104.9 | 99.3  | 106.1 | 100.2 | 94.5  | 94.9  |
| Q9DCT1 | <i>Akr1e2</i>    | 1,5-anhydro-D-    | High   | 28 | 9  | 12  | 8  | 301  | 34.4  | 7.33  | 144  | 101.3 | 104.1 | 97    | 100.5 | 97.1  | 100   |
| Q8R121 | <i>Serpina10</i> | Protein Z-        | High   | 8  | 3  | 3   | 3  | 448  | 51.8  | 5.67  | 63   | 124.2 | 93.9  | 131.2 | 90.6  | 76.9  | 83.1  |
| Q9EPJ9 | <i>Arfgap1</i>   | ADP-ribosylation  | High   | 45 | 14 | 22  | 14 | 414  | 45.3  | 5.57  | 351  | 94.4  | 95.2  | 90.5  | 106.2 | 108.7 | 105   |
| P97770 | <i>Thumpd3</i>   | THUMP domain-     | High   | 2  | 1  | 2   | 1  | 505  | 56.4  | 7.43  | 32   | 99.5  | 103.6 | 102.7 | 102.9 | 99.6  | 91.7  |
| P70429 | <i>Evl</i>       | Ena/VASP-like     | High   | 10 | 3  | 3   | 2  | 414  | 44.3  | 8.85  | 48   | 99.1  | 100.1 | 101.5 | 100.6 | 103.1 | 95.5  |
| Q80U28 | <i>Madd</i>      | MAP kinase-       | High   | 22 | 30 | 39  | 30 | 1577 | 175.1 | 6.04  | 528  | 99.9  | 97.1  | 95.5  | 106.4 | 100.7 | 100.4 |
| Q8K4Q0 | <i>Rptor</i>     | Regulatory-       | High   | 11 | 13 | 14  | 13 | 1335 | 149.4 | 6.87  | 176  | 98.3  | 98.3  | 93    | 103.1 | 103.8 | 103.4 |
| P55264 | <i>Adk</i>       | Adenosine         | High   | 20 | 7  | 9   | 7  | 361  | 40.1  | 6.21  | 140  | 101.9 | 100.9 | 107.8 | 97.1  | 96.4  | 95.9  |
| Q8C1B1 | <i>Camsap2</i>   | Calmodulin-       | High   | 10 | 11 | 12  | 11 | 1461 | 164.2 | 6.86  | 113  | 95.4  | 100.1 | 90.4  | 108   | 104.4 | 101.7 |
| Q1HFZ0 | <i>Nsun2</i>     | RNA cytosine      | High   | 5  | 3  | 3   | 3  | 757  | 85.4  | 6.58  | 59   | 98.5  | 93.2  | 107.1 | 95.5  | 101.4 | 104.2 |
| Q9QY24 | <i>Zbp1</i>      | Z-DNA-binding     | Medium | 3  | 1  | 1   | 1  | 411  | 44.3  | 5.8   | 0    |       |       |       |       |       |       |
| Q8C5W3 | <i>Tbcel</i>     | Tubulin-specific  | High   | 11 | 4  | 5   | 4  | 424  | 48    | 5.53  | 43   | 93.9  | 98.5  | 95.6  | 96.6  | 101.7 | 113.6 |
| Q64519 | <i>Sdc3</i>      | Syndecan-3        | Low    | 2  | 1  | 1   | 1  | 442  | 46    | 4.59  | 0    | 97.9  | 96.6  | 88.5  | 104.5 | 111.9 | 100.7 |
| Q8C0I1 | <i>Agps</i>      | Alkylidihydroxyac | High   | 14 | 5  | 6   | 5  | 645  | 71.6  | 7.5   | 83   | 98.5  | 102.5 | 107.2 | 95.8  | 99.5  | 96.6  |
| Q505B7 | <i>Zbtb8os</i>   | Protein archease  | High   | 6  | 1  | 1   | 1  | 168  | 19.7  | 4.56  | 26   | 105.6 | 101.2 | 102.9 | 94.5  | 94.7  | 101.2 |
| Q9D0K2 | <i>Oxct1</i>     | Succinyl-CoA:3-   | High   | 52 | 18 | 67  | 18 | 520  | 56    | 8.53  | 984  | 91.7  | 91.3  | 86.9  | 110.7 | 111.1 | 108.4 |
| Q9CPQ1 | <i>Cox6c</i>     | Cytochrome c      | High   | 43 | 4  | 12  | 4  | 76   | 8.5   | 10.14 | 72   | 94.7  | 109.9 | 87    | 100.4 | 108.1 | 99.9  |
| Q3UHK1 | <i>Slc2a13</i>   | Proton myo-       | High   | 10 | 5  | 6   | 5  | 637  | 69    | 6.86  | 138  | 94.8  | 104.7 | 91.6  | 104.5 | 101.2 | 103.2 |
| Q8BGA5 | <i>Krr1</i>      | KRR1 small        | Low    | 2  | 1  | 1   | 1  | 380  | 43.5  | 9.79  | 0    | 108.9 | 102.5 | 103.8 | 91.6  | 95.6  | 97.6  |
| Q9D735 | <i>Trir</i>      | Telomerase        | High   | 7  | 1  | 1   | 1  | 173  | 18.4  | 9.67  | 30   | 112.4 | 95.8  | 100.9 | 95.1  | 103.3 | 92.6  |
| Q9ESX5 | <i>Dkc1</i>      | H/ACA             | High   | 10 | 3  | 3   | 3  | 509  | 57.4  | 9.28  | 79   | 92.6  | 96.5  | 98.4  | 94.8  | 97.8  | 119.9 |
| Q80YA7 | <i>Dpp8</i>      | Dipeptidyl        | High   | 4  | 3  | 7   | 2  | 892  | 102.1 | 5.81  | 132  | 112.1 | 100.1 | 99.7  | 98.3  | 95.2  | 94.6  |
| P47867 | <i>Scg3</i>      | Secretogranin-3   | High   | 15 | 4  | 7   | 4  | 471  | 53.3  | 4.93  | 88   | 108.8 | 98.7  | 109.5 | 96.3  | 94.4  | 92.3  |
| B9EKR1 | <i>Ptprz1</i>    | Receptor-type     | High   | 10 | 20 | 41  | 20 | 2312 | 254.2 | 4.88  | 700  | 94.4  | 101.7 | 89.3  | 103.8 | 106.3 | 104.5 |
| Q65Z40 | <i>Wapl</i>      | Wings apart-like  | Medium | 1  | 1  | 1   | 1  | 1200 | 134   | 5.41  | 19   |       |       |       |       |       |       |
| Q8BUV3 | <i>Gphn</i>      | Gephyrin          | High   | 33 | 19 | 29  | 19 | 769  | 83.2  | 5.6   | 513  | 98.8  | 100.5 | 90.6  | 104.7 | 104.8 | 100.5 |
| P47880 | <i>Igf1bp6</i>   | Insulin-like      | Medium | 6  | 1  | 1   | 1  | 238  | 25.3  | 8.19  | 0    | 100.5 | 110.8 | 98.5  | 77.6  | 102   | 110.6 |
| Q8BGT6 | <i>Micall1</i>   | MICAL-like        | Low    | 1  | 1  | 1   | 1  | 870  | 94    | 6.68  | 13   |       |       |       |       |       |       |
| Q8R1T1 | <i>Chmp7</i>     | Charged           | High   | 13 | 5  | 6   | 5  | 451  | 50.6  | 5.22  | 50   | 92.3  | 96.3  | 91.1  | 103.1 | 106.4 | 110.8 |
| P20491 | <i>Fcer1g</i>    | High affinity     | High   | 26 | 2  | 2   | 2  | 86   | 9.6   | 7.97  | 24   | 128   | 105.6 | 176.4 | 61.7  | 63    | 65.3  |
| P97927 | <i>Lama4</i>     | Laminin subunit   | High   | 1  | 2  | 2   | 2  | 1816 | 201.7 | 6.21  | 22   | 105.9 | 105.4 | 98.5  | 96.9  | 96    | 97.3  |
| P62960 | <i>Ybx1</i>      | Y-box-binding     | High   | 6  | 1  | 1   | 1  | 322  | 35.7  | 9.88  | 31   | 95.3  | 100.8 | 117.1 | 95.7  | 84.1  | 107   |
| Q8VHR5 | <i>Gatad2b</i>   | Transcriptional   | High   | 9  | 4  | 4   | 4  | 594  | 65.4  | 9.7   | 60   | 100.6 | 106.2 | 106.1 | 99.1  | 93.8  | 94.1  |
| P85094 | <i>Isoc2a</i>    | Isochorismatase   | High   | 52 | 6  | 9   | 6  | 206  | 22.4  | 8.02  | 113  | 102.1 | 105.4 | 104.4 | 95.7  | 95.2  | 97.1  |
| Q9D8S3 | <i>Arfgap3</i>   | ADP-ribosylation  | High   | 8  | 4  | 5   | 4  | 523  | 57.4  | 8.47  | 60   | 95    | 101.4 | 95.1  | 103.2 | 100.4 | 104.9 |

|        |                  |                    |        |    |    |     |    |      |       |       |      |       |       |       |       |       |       |
|--------|------------------|--------------------|--------|----|----|-----|----|------|-------|-------|------|-------|-------|-------|-------|-------|-------|
| P08101 | <i>Fcgr2</i>     | Low affinity       | High   | 7  | 2  | 3   | 2  | 330  | 36.7  | 6.73  | 44   | 122.8 | 105.8 | 161.6 | 70.9  | 72    | 66.9  |
| Q8BHZ0 | <i>Cyria</i>     | CYFIP-related      | High   | 41 | 10 | 22  | 8  | 323  | 37.3  | 6.01  | 368  | 101.4 | 99    | 100.2 | 104.8 | 95.6  | 99    |
| Q99NF3 | <i>Cep41</i>     | Centrosomal        | Medium | 3  | 1  | 1   | 1  | 373  | 41.4  | 8.12  | 17   |       |       |       |       |       |       |
| Q8CIE6 | <i>Copa</i>      | Coatomer           | High   | 26 | 26 | 33  | 26 | 1224 | 138.3 | 7.65  | 370  | 98.9  | 100.4 | 105.2 | 99.3  | 97.2  | 99    |
| Q8R191 | <i>Syngn3</i>    | Synaptogyrin-3     | High   | 20 | 4  | 11  | 4  | 229  | 24.5  | 8.18  | 302  | 97    | 94    | 96.7  | 106.9 | 102.8 | 102.5 |
| Q925E7 | <i>Ppp2r2d</i>   | Serine/threonine   | High   | 20 | 7  | 10  | 1  | 453  | 51.9  | 6.49  | 134  |       |       |       |       |       |       |
| P58742 | <i>Aaas</i>      | Aladin OS=Mus      | High   | 4  | 2  | 2   | 2  | 546  | 59.4  | 6.87  | 0    | 98.8  | 105.6 | 92    | 99.8  | 103.3 | 100.5 |
| P14847 | <i>Crp</i>       | C-reactive         | High   | 24 | 3  | 4   | 3  | 225  | 25.3  | 6.2   | 32   | 129.5 | 100.5 | 141.2 | 73.5  | 81.6  | 73.7  |
| P36552 | <i>Cpox</i>      | Oxygen-            | High   | 12 | 4  | 4   | 4  | 443  | 49.7  | 8.53  | 30   | 100.5 | 100.9 | 86.7  | 104.3 | 104.3 | 103.2 |
| Q8K1R7 | <i>Nek9</i>      | Serine/threonine   | High   | 1  | 1  | 1   | 1  | 984  | 107.1 | 5.63  | 33   | 101.5 | 103.6 | 106.2 | 90.5  | 103.1 | 95.1  |
| Q8BH04 | <i>Pck2</i>      | Phosphoenolpyr     | High   | 30 | 14 | 18  | 14 | 640  | 70.5  | 7.28  | 378  | 95.2  | 95.1  | 105   | 97.4  | 103.2 | 104.1 |
| Q9D3D0 | <i>Ttpal</i>     | Alpha-tocopherol   | High   | 12 | 3  | 5   | 3  | 343  | 38.8  | 6.44  | 40   | 85.2  | 93.7  | 95.6  | 104.5 | 99.9  | 121.2 |
| P98195 | <i>Atp9b</i>     | Probable           | High   | 7  | 6  | 6   | 3  | 1146 | 128.9 | 7.64  | 47   | 108.2 | 89    | 94.7  | 102.5 | 98.8  | 106.7 |
| P99027 | <i>Rplp2</i>     | 60S acidic         | High   | 60 | 5  | 14  | 5  | 115  | 11.6  | 4.54  | 281  | 99.9  | 100.7 | 102.8 | 95.4  | 102.1 | 99.2  |
| P55066 | <i>Ncan</i>      | Neurocan core      | High   | 16 | 17 | 20  | 16 | 1268 | 137.1 | 5.72  | 283  | 99.4  | 100.3 | 100.3 | 98.9  | 99.5  | 101.6 |
| O09106 | <i>Hdac1</i>     | Histone            | High   | 15 | 5  | 5   | 2  | 482  | 55    | 5.48  | 48   | 94.8  | 97.1  | 94.4  | 106.6 | 98.4  | 108.7 |
| Q3U1J4 | <i>Ddb1</i>      | DNA damage-        | High   | 25 | 26 | 41  | 26 | 1140 | 126.8 | 5.26  | 581  | 99.9  | 99.6  | 97.1  | 102.5 | 101   | 100   |
| Q9WTX5 | <i>Skp1</i>      | S-phase kinase-    | High   | 34 | 7  | 13  | 7  | 163  | 18.7  | 4.54  | 145  | 101.5 | 103.1 | 99.2  | 102.4 | 98.1  | 95.7  |
| Q91VA6 | <i>Poldip2</i>   | Polymerase         | High   | 9  | 3  | 3   | 3  | 368  | 41.8  | 8.63  | 96   | 95.8  | 101.4 | 96.2  | 104.7 | 99.1  | 102.9 |
| P24788 | <i>Cdk11b</i>    | Cyclin-            | High   | 4  | 3  | 3   | 3  | 784  | 91.5  | 5.39  | 44   | 108.3 | 97.9  | 108.2 | 92.5  | 95.1  | 98    |
| Q9JLC4 | <i>Sorcs1</i>    | VPS10 domain-      | High   | 3  | 3  | 3   | 3  | 1167 | 129.6 | 7.55  | 48   | 97.1  | 101.7 | 94.3  | 101.8 | 104.1 | 101.1 |
| Q9Z1P6 | <i>Ndufa7</i>    | NADH               | High   | 62 | 8  | 20  | 8  | 113  | 12.6  | 10.17 | 296  | 99    | 101.9 | 95.1  | 101   | 100.8 | 102.2 |
| Q9WVJ2 | <i>Psm13</i>     | 26S proteasome     | High   | 45 | 15 | 22  | 15 | 376  | 42.8  | 5.71  | 314  | 99.3  | 99.8  | 101.8 | 99.2  | 99.1  | 100.7 |
| Q6PIP5 | <i>Nudcd1</i>    | NudC domain-       | High   | 11 | 5  | 6   | 5  | 582  | 66.7  | 5.3   | 48   | 103   | 100   | 94.5  | 99.5  | 106   | 97    |
| Q9CQ89 | <i>Cuta</i>      | Protein CutA       | High   | 16 | 3  | 7   | 3  | 177  | 18.9  | 6.77  | 182  | 94.8  | 101.5 | 85.1  | 104.4 | 105.6 | 108.6 |
| P08775 | <i>Polr2a</i>    | DNA-directed       | High   | 1  | 2  | 2   | 2  | 1970 | 217   | 7.37  | 25   | 85    | 100   | 99.4  | 101.3 | 91.8  | 122.5 |
| Q61644 | <i>Pacsin1</i>   | Protein kinase C   | High   | 59 | 22 | 55  | 20 | 441  | 50.5  | 5.24  | 1051 | 96.1  | 102.3 | 88    | 106   | 103.1 | 104.5 |
| Q62523 | <i>Zyx</i>       | Zyxin OS=Mus       | High   | 19 | 7  | 8   | 7  | 564  | 60.5  | 6.4   | 109  | 102.1 | 100   | 101.4 | 99.8  | 98    | 98.7  |
| Q8BVL9 | <i>Jakmip1</i>   | Janus kinase       | High   | 9  | 5  | 5   | 4  | 626  | 73.1  | 6.09  | 70   | 93.6  | 95    | 106.8 | 98    | 104.7 | 101.9 |
| Q9CQ92 | <i>Fis1</i>      | Mitochondrial      | High   | 43 | 6  | 17  | 6  | 152  | 17    | 8.53  | 324  | 96.5  | 98.2  | 97.8  | 100   | 97.4  | 110.1 |
| Q9JI18 | <i>Lrp1b</i>     | Low-density        | High   | 1  | 3  | 3   | 3  | 4599 | 513.3 | 5.39  | 26   | 87.8  | 99.1  | 92    | 111   | 102.1 | 108   |
| Q9WVJ3 | <i>Cpq</i>       | Carboxypeptidas    | High   | 2  | 1  | 1   | 1  | 470  | 51.8  | 6.21  | 46   |       |       |       |       |       |       |
| Q99JR5 | <i>Tinagl1</i>   | Tubulointerstitial | High   | 8  | 3  | 3   | 3  | 466  | 52.6  | 6.77  | 49   | 95.6  | 104.4 | 96    | 89.4  | 124.8 | 89.8  |
| Q8CCS6 | <i>Pabpn1</i>    | Polyadenylate-     | High   | 6  | 2  | 3   | 2  | 302  | 32.3  | 5.17  | 67   | 91.8  | 94.7  | 97.6  | 104.7 | 108.4 | 102.8 |
| Q9JKL4 | <i>Ndufaf3</i>   | NADH               | High   | 29 | 3  | 5   | 3  | 185  | 20.7  | 8.05  | 61   | 97.1  | 98.1  | 89.1  | 107.5 | 106.4 | 101.9 |
| Q9CQ65 | <i>Mtap</i>      | S-methyl-5'-       | High   | 32 | 7  | 9   | 7  | 283  | 31    | 7.14  | 173  | 104.9 | 102.2 | 107.6 | 91.7  | 95.2  | 98.4  |
| Q920P5 | <i>Ak5</i>       | Adenylate kinase   | High   | 21 | 10 | 13  | 10 | 562  | 63.3  | 5.29  | 234  | 102   | 96.3  | 101.4 | 96.4  | 101.7 | 102.2 |
| Q7TNC4 | <i>Luc7l2</i>    | Putative RNA-      | High   | 13 | 5  | 5   | 3  | 392  | 46.6  | 10.1  | 106  | 97.3  | 100.1 | 100.2 | 97.7  | 101   | 103.7 |
| Q91ZA3 | <i>Pcca</i>      | Propionyl-CoA      | High   | 34 | 20 | 30  | 20 | 724  | 79.9  | 7.25  | 550  | 95    | 102.5 | 97.4  | 100.9 | 102.7 | 101.6 |
| P63216 | <i>Gng3</i>      | Guanine            | High   | 81 | 5  | 9   | 5  | 75   | 8.3   | 7.78  | 106  | 99.9  | 105.1 | 89.1  | 99.5  | 105.3 | 101.1 |
| Q80UU9 | <i>Pgrmc2</i>    | Membrane-          | High   | 31 | 5  | 6   | 4  | 217  | 23.3  | 5.15  | 92   | 99.4  | 100.8 | 100.7 | 100.1 | 99.9  | 99.2  |
| Q9Z0G0 | <i>Gipc1</i>     | PDZ domain-        | High   | 23 | 7  | 10  | 7  | 333  | 36.1  | 5.91  | 169  | 96.1  | 95.8  | 91.5  | 103.3 | 101.4 | 111.9 |
| Q80UP3 | <i>Dgkz</i>      | Diacylglycerol     | High   | 15 | 11 | 13  | 9  | 929  | 104   | 8.09  | 164  | 91.4  | 103.6 | 88.9  | 107.1 | 105.4 | 103.6 |
| Q3UNH4 | <i>Gprin1</i>    | G protein-         | High   | 48 | 38 | 50  | 38 | 932  | 95.4  | 7.93  | 634  | 93.9  | 89.4  | 94.6  | 105   | 110   | 107.1 |
| P12960 | <i>Cntn1</i>     | Contactin-1        | High   | 51 | 41 | 114 | 41 | 1020 | 113.3 | 6.16  | 1785 | 95    | 100.2 | 87.6  | 104.8 | 107.7 | 104.6 |
| Q8BGX0 | <i>Trim23</i>    | E3 ubiquitin-      | High   | 4  | 2  | 6   | 1  | 574  | 63.9  | 6.46  | 96   | 98    | 101.4 | 88.7  | 109   | 101.4 | 101.5 |
| Q80TB8 | <i>Vat1l</i>     | Synaptic vesicle   | High   | 35 | 13 | 19  | 13 | 417  | 45.8  | 5.06  | 363  | 99.9  | 84.9  | 99.6  | 99.7  | 110.2 | 105.6 |
| Q9JI91 | <i>Actn2</i>     | Alpha-actinin-2    | High   | 43 | 31 | 63  | 20 | 894  | 103.8 | 5.45  | 1215 | 97.5  | 100.8 | 89.3  | 98    | 109.4 | 105   |
| Q8R361 | <i>Rab11fip5</i> | Rab11 family-      | High   | 26 | 12 | 14  | 12 | 645  | 69.5  | 9.07  | 324  | 98.8  | 104.7 | 96.1  | 98    | 101.6 | 100.9 |
| Q0VBD0 | <i>Itgb8</i>     | Integrin beta-8    | High   | 8  | 5  | 7   | 5  | 767  | 84.5  | 7.09  | 159  | 90.5  | 100.5 | 98.9  | 104.4 | 105.9 | 99.8  |
| Q8BR63 | <i>Fam177a1</i>  | Protein            | High   | 31 | 5  | 7   | 5  | 207  | 23.6  | 4.59  | 149  | 91.8  | 100.6 | 100.5 | 103.8 | 98.3  | 105   |
| P06683 | <i>C9</i>        | Complement         | High   | 11 | 6  | 9   | 6  | 548  | 62    | 5.78  | 181  | 160.3 | 72.6  | 204.8 | 52    | 54.4  | 55.9  |
| Q62188 | <i>Dpysl3</i>    | Dihydropyrimidin   | High   | 66 | 25 | 81  | 21 | 570  | 61.9  | 6.49  | 2118 | 80.3  | 80.3  | 81.9  | 115.7 | 121.2 | 120.6 |
| Q9CTY5 | <i>Micu3</i>     | Calcium uptake     | High   | 18 | 8  | 10  | 8  | 523  | 59.8  | 7.15  | 228  | 90.4  | 101.1 | 85.3  | 104.7 | 106.7 | 111.8 |
| P55258 | <i>Rab8a</i>     | Ras-related        | High   | 43 | 9  | 31  | 2  | 207  | 23.7  | 9.07  | 654  | 102.7 | 102.2 | 97.8  | 99.2  | 87.3  | 110.8 |
| Q8K3M5 | <i>Cables2</i>   | CDK5 and ABL1      | Medium | 1  | 1  | 1   | 1  | 476  | 52    | 9.86  | 24   | 99.6  | 101.4 | 102.3 | 97.1  | 85.8  | 113.8 |
| Q9D662 | <i>Sec23b</i>    | Protein transport  | High   | 6  | 3  | 5   | 1  | 767  | 86.4  | 6.96  | 155  | 96.5  | 105.3 | 114.6 | 99    | 80.5  | 104.1 |
| Q3UDP0 | <i>Wdr41</i>     | WD repeat-         | High   | 15 | 4  | 5   | 4  | 460  | 51.5  | 5.15  | 110  | 106.2 | 95.9  | 97.7  | 96.7  | 101.6 | 101.9 |
| Q9JLQ0 | <i>Cd2ap</i>     | CD2-associated     | High   | 4  | 2  | 2   | 2  | 637  | 70.4  | 6.38  | 26   | 101.6 | 105.5 | 92    | 99.5  | 94.8  | 106.5 |
| Q9CQI6 | <i>Cotl1</i>     | Coactosin-like     | High   | 70 | 9  | 18  | 9  | 142  | 15.9  | 5.4   | 329  | 112.8 | 100.3 | 121.8 | 85.4  | 90.5  | 89.1  |
| Q61838 | <i>Pzp</i>       | Pregnancy zone     | High   | 33 | 35 | 72  | 35 | 1495 | 165.7 | 6.68  | 1121 | 186.4 | 59.1  | 217.1 | 43.7  | 45.6  | 48.2  |
| Q9EQS3 | <i>Mycbp</i>     | c-Myc-binding      | High   | 26 | 3  | 3   | 3  | 103  | 12    | 5.91  | 39   | 100.8 | 103.1 | 116.1 | 93.6  | 92.5  | 93.9  |
| O70310 | <i>Nmt1</i>      | Glycylpeptide N-   | High   | 32 | 12 | 18  | 8  | 496  | 56.9  | 8     | 299  | 102.6 | 100.4 | 104.1 | 96.3  | 99.5  | 97.2  |
| Q8BV13 | <i>Cops7b</i>    | COP9               | High   | 12 | 2  | 2   | 2  | 264  | 29.7  | 6.32  | 56   | 102   | 92.2  | 94.1  | 104   | 104.8 | 102.9 |
| P70333 | <i>Hnrnp2</i>    | Heterogeneous      | High   | 34 | 11 | 24  | 4  | 449  | 49.2  | 6.3   | 391  | 99.1  | 93.4  | 97.1  | 102.9 | 100.8 | 106.6 |
| Q921I6 | <i>Sh3bp4</i>    | SH3 domain-        | Medium | 1  | 1  | 1   | 1  | 962  | 107.5 | 7.34  | 0    |       |       |       |       |       |       |
| Q8R4N0 | <i>Clybl</i>     | Citramalyl-CoA     | High   | 39 | 11 | 15  | 11 | 338  | 37.5  | 8.54  | 242  | 98.8  | 100.4 | 99.7  | 100.5 | 98.6  | 101.9 |
| P30681 | <i>Hmgb2</i>     | High mobility      | High   | 13 | 3  | 3   | 2  | 210  | 24.1  | 7.31  | 44   | 118.3 | 113.8 | 152.1 | 68.8  | 71.3  | 75.6  |



|        |                  |                   |        |    |    |     |    |      |       |       |      |       |       |       |       |       |       |
|--------|------------------|-------------------|--------|----|----|-----|----|------|-------|-------|------|-------|-------|-------|-------|-------|-------|
| Q8R2R9 | <i>Ap3m2</i>     | AP-3 complex      | High   | 37 | 11 | 14  | 8  | 418  | 46.9  | 7.56  | 237  | 95.9  | 98.7  | 90.1  | 105.5 | 105.3 | 104.5 |
| Q99LJ0 | <i>Cttnbp2nl</i> | CTTNBP2 N-        | High   | 1  | 1  | 1   | 1  | 638  | 69.8  | 7.71  | 29   |       |       |       |       |       |       |
| Q8CBG9 | <i>Rnf170</i>    | E3 ubiquitin-     | High   | 5  | 1  | 1   | 1  | 286  | 33.4  | 5.66  | 31   | 92.7  | 113.3 | 107.2 | 91.9  | 89.2  | 105.7 |
| Q62417 | <i>Sorbs1</i>    | Sorbin and SH3    | High   | 12 | 12 | 17  | 12 | 1290 | 143   | 8.25  | 309  | 99.2  | 99.4  | 102.3 | 98.5  | 101.4 | 99.2  |
| P50295 | <i>Nat2</i>      | Arylamine N-      | Low    | 4  | 1  | 1   | 1  | 290  | 33.7  | 5.88  | 0    | 102   | 99.5  | 93.7  | 98.8  | 95.3  | 110.7 |
| Q61035 | <i>Hars1</i>     | Histidine--tRNA   | High   | 36 | 16 | 24  | 13 | 509  | 57.4  | 6     | 391  | 102.4 | 99.7  | 106.1 | 95.7  | 100.9 | 95.2  |
| Q5SYD0 | <i>Myo1d</i>     | Unconventional    | High   | 20 | 16 | 18  | 16 | 1006 | 116   | 9.41  | 176  | 98.9  | 118.7 | 102   | 95.8  | 88.8  | 95.8  |
| Q8C1Y8 | <i>Ccz1</i>      | Vacuolar fusion   | High   | 11 | 5  | 6   | 5  | 480  | 55.5  | 6.02  | 85   | 99.3  | 101.9 | 93.7  | 101.4 | 99.6  | 104.2 |
| Q9WV69 | <i>Dmtn</i>      | Dematin           | High   | 28 | 11 | 27  | 10 | 405  | 45.4  | 8.41  | 407  | 94.4  | 100.1 | 89.1  | 107.7 | 101.8 | 106.8 |
| P0DP26 | <i>Calm1</i>     | Calmodulin-1      | High   | 68 | 12 | 160 | 12 | 149  | 16.8  | 4.22  | 3324 | 90.6  | 99.8  | 86.4  | 110.5 | 108.5 | 104.2 |
| P12382 | <i>Pfkl</i>      | ATP-dependent     | High   | 32 | 22 | 47  | 18 | 780  | 85.3  | 7.17  | 970  | 102.1 | 102.5 | 104   | 95.3  | 98.4  | 97.7  |
| Q8K212 | <i>Pacs1</i>     | Phosphofurin      | High   | 24 | 19 | 24  | 18 | 961  | 104.8 | 7.74  | 261  | 97.2  | 100.9 | 91.7  | 104.6 | 101.8 | 103.8 |
| Q9Z2I8 | <i>Suclg2</i>    | Succinate--CoA    | High   | 31 | 11 | 12  | 11 | 433  | 46.8  | 7.02  | 245  | 98.2  | 108.3 | 101.1 | 97.4  | 96.6  | 98.3  |
| Q9CZ7  | <i>Shmt2</i>     | Serine            | High   | 21 | 9  | 11  | 9  | 504  | 55.7  | 8.47  | 192  | 101.9 | 102.5 | 99    | 99.2  | 98.7  | 98.8  |
| Q8C3J5 | <i>Dock2</i>     | Dedicator of      | High   | 1  | 3  | 3   | 3  | 1828 | 211.6 | 6.99  | 29   | 107.7 | 92.1  | 107.9 | 102.3 | 77.1  | 112.9 |
| O35680 | <i>Mrps12</i>    | 28S ribosomal     | Medium | 14 | 2  | 2   | 2  | 139  | 15.4  | 10.71 | 0    |       |       |       |       |       |       |
| O88703 | <i>Hcn2</i>      | Potassium/sodiu   | High   | 12 | 8  | 10  | 4  | 863  | 94.7  | 8.73  | 200  | 98.5  | 111.9 | 90.7  | 99.1  | 99.9  | 100   |
| O70274 | <i>Ptp4a2</i>    | Protein tyrosine  | High   | 27 | 4  | 4   | 1  | 167  | 19.1  | 8.37  | 64   |       |       |       |       |       |       |
| O70480 | <i>Vamp4</i>     | Vesicle-          | High   | 23 | 3  | 3   | 3  | 141  | 16.3  | 7.36  | 32   | 98.5  | 98.4  | 103.3 | 101.5 | 99.3  | 99.1  |
| Q6P1B1 | <i>Xpnpep1</i>   | Xaa-Pro           | High   | 22 | 12 | 18  | 12 | 623  | 69.5  | 5.54  | 357  | 95    | 96.4  | 95.2  | 105   | 104.5 | 103.8 |
| Q9QXS6 | <i>Dbn1</i>      | Drebrin OS=Mus    | High   | 46 | 24 | 45  | 24 | 706  | 77.2  | 4.49  | 803  | 91.3  | 94.8  | 91.7  | 106.6 | 106.9 | 108.6 |
| Q8BH61 | <i>F13a1</i>     | Coagulation       | High   | 6  | 4  | 4   | 4  | 732  | 83.2  | 5.92  | 64   | 112.2 | 96.8  | 138.5 | 80.1  | 88.4  | 84.1  |
| Q921J2 | <i>Rheb</i>      | GTP-binding       | High   | 32 | 7  | 13  | 7  | 184  | 20.4  | 5.92  | 171  | 95.6  | 95.9  | 93.8  | 107.8 | 99.2  | 107.6 |
| Q62425 | <i>Ndufa4</i>    | Cytochrome c      | High   | 56 | 6  | 25  | 6  | 82   | 9.3   | 9.52  | 405  | 94.8  | 100.9 | 85.6  | 107.7 | 111.7 | 99.3  |
| Q6PDQ2 | <i>Chd4</i>      | Chromodomain-     | High   | 3  | 5  | 6   | 5  | 1915 | 217.6 | 5.81  | 66   | 106.2 | 94.7  | 106.6 | 101.6 | 90.9  | 100.1 |
| Q9CX34 | <i>Sugt1</i>     | Protein SGT1      | High   | 56 | 16 | 23  | 16 | 336  | 38.1  | 5.45  | 433  | 99.3  | 102.2 | 97.3  | 100.5 | 100.6 | 100   |
| P52800 | <i>Efnb2</i>     | Ephrin-B2         | High   | 4  | 1  | 1   | 1  | 336  | 37.2  | 8.97  | 42   | 98.9  | 91.6  | 110.7 | 92.5  | 105   | 101.3 |
| Q9DBS9 | <i>Osbp13</i>    | Oxysterol-        | High   | 5  | 3  | 4   | 3  | 855  | 96.9  | 6.51  | 67   | 97.1  | 97.2  | 96.4  | 105.3 | 102.6 | 101.4 |
| A2AJL3 | <i>Fgyy</i>      | FGGY              | Medium | 3  | 1  | 1   | 1  | 552  | 60.3  | 6.42  | 0    | 89.8  | 92.8  | 119.8 | 103.5 | 103.5 | 90.5  |
| Q9CXW3 | <i>Cacybp</i>    | Calcyclin-binding | High   | 50 | 10 | 13  | 10 | 229  | 26.5  | 7.87  | 125  | 101.8 | 103.2 | 100.5 | 101.4 | 97.8  | 95.3  |
| Q99J31 | <i>Ophn1</i>     | Oligophrenin-1    | High   | 6  | 4  | 4   | 4  | 802  | 91.9  | 7.96  | 91   | 95.1  | 98.9  | 99.6  | 96.5  | 101.2 | 108.7 |
| Q8C854 | <i>Myef2</i>     | Myelin            | High   | 24 | 13 | 17  | 13 | 591  | 63.3  | 8.87  | 288  | 102.5 | 97.9  | 103.3 | 98.4  | 98.5  | 99.3  |
| Q8R550 | <i>Sh3kbp1</i>   | SH3 domain-       | High   | 22 | 13 | 16  | 13 | 709  | 78.1  | 7.55  | 358  | 98.2  | 97.8  | 96.5  | 100.1 | 104.7 | 102.7 |
| Q7TMR0 | <i>Prcp</i>      | Lysosomal Pro-X   | High   | 5  | 2  | 2   | 2  | 491  | 55    | 6.79  | 56   | 95.7  | 100.4 | 102.8 | 104.1 | 103.3 | 93.7  |
| Q6GV12 | <i>Kdsr</i>      | 3-                | High   | 8  | 2  | 3   | 2  | 332  | 35.9  | 7.9   | 64   | 113   | 98.3  | 108.6 | 89.4  | 91.4  | 99.3  |
| Q61026 | <i>Ncoa2</i>     | Nuclear receptor  | High   | 1  | 1  | 1   | 1  | 1462 | 158.4 | 6.68  | 21   |       |       |       |       |       |       |
| Q9CQL7 | <i>Mrfap1</i>    | MORF4 family-     | Medium | 8  | 1  | 1   | 1  | 125  | 14.2  | 4.73  | 0    |       |       |       |       |       |       |
| Q99J85 | <i>Nptxr</i>     | Neuronal          | High   | 44 | 16 | 26  | 16 | 493  | 52.3  | 6.13  | 489  | 101   | 94.4  | 108.1 | 99.7  | 98.8  | 98    |
| Q61425 | <i>Hadh</i>      | Hydroxyacyl-      | High   | 16 | 7  | 8   | 7  | 314  | 34.4  | 8.65  | 69   | 100.3 | 102.7 | 103.3 | 94.2  | 98.2  | 101.4 |
| Q61598 | <i>Gdi2</i>      | Rab GDP           | High   | 64 | 28 | 68  | 22 | 445  | 50.5  | 6.25  | 1140 | 103.1 | 101.5 | 102.2 | 97.1  | 99.2  | 96.9  |
| P62702 | <i>Rps4x</i>     | 40S ribosomal     | High   | 46 | 12 | 24  | 12 | 263  | 29.6  | 10.15 | 500  | 104.4 | 99.7  | 109   | 98.7  | 94.3  | 93.9  |
| Q8K411 | <i>Pitrm1</i>    | Presequence       | High   | 13 | 12 | 14  | 12 | 1036 | 117.3 | 7.2   | 147  | 94.4  | 95.7  | 96.5  | 104.7 | 104.4 | 104.3 |
| Q9D1G5 | <i>Lrrc57</i>    | Leucine-rich      | High   | 56 | 12 | 21  | 12 | 239  | 26.7  | 8.35  | 294  | 99.9  | 107   | 95.4  | 100.3 | 99.1  | 98.3  |
| Q9ES89 | <i>Extl2</i>     | Exostosin-like 2  | Medium | 2  | 1  | 1   | 1  | 330  | 37.4  | 9.04  | 31   | 107.1 | 106.2 | 91.9  | 100.8 | 97.6  | 96.4  |
| Q8BTG7 | <i>Ndrp4</i>     | Protein NDRG4     | High   | 29 | 7  | 11  | 7  | 352  | 38.5  | 6.32  | 181  | 100.8 | 98.5  | 104.3 | 102.1 | 97.3  | 97    |
| O88545 | <i>Cops6</i>     | COP9              | High   | 23 | 6  | 11  | 6  | 324  | 35.9  | 5.73  | 164  | 98.8  | 104.5 | 100.1 | 97.3  | 100.4 | 99    |
| P63239 | <i>Pcsk1</i>     | Neuroendocrine    | Medium | 1  | 1  | 1   | 1  | 753  | 84.1  | 6.43  | 20   | 93.3  | 100.8 | 92    | 108.2 | 103   | 102.7 |
| Q9CRY7 | <i>Gdpc1</i>     | Lysophospholipa   | High   | 20 | 5  | 5   | 5  | 314  | 35.8  | 8.31  | 103  | 96.8  | 96.2  | 100.9 | 104.5 | 97.1  | 104.4 |
| Q04857 | <i>Col6a1</i>    | Collagen alpha-   | High   | 5  | 4  | 4   | 4  | 1025 | 108.4 | 5.36  | 51   | 108.2 | 97.7  | 98.8  | 86.4  | 102.2 | 106.7 |
| Q9R0D8 | <i>Wdr54</i>     | WD repeat-        | High   | 25 | 4  | 5   | 4  | 334  | 35.6  | 6.21  | 145  | 94.1  | 100.8 | 91.9  | 96.7  | 109.1 | 107.4 |
| O88845 | <i>Akap10</i>    | A-kinase anchor   | Medium | 2  | 1  | 1   | 1  | 662  | 73.6  | 6.79  | 27   | 97.3  | 100.7 | 84.5  | 103   | 102.8 | 111.8 |
| Q80UG5 | <i>Septin9</i>   | Septin-9          | High   | 33 | 18 | 25  | 18 | 583  | 65.5  | 8.9   | 355  | 98.7  | 98.5  | 95.7  | 102.4 | 101.1 | 103.6 |
| P56379 | <i>Atp5mpl</i>   | ATP synthase      | High   | 29 | 2  | 6   | 2  | 58   | 6.7   | 9.99  | 100  | 99.4  | 109.7 | 91.6  | 105   | 97.2  | 97.2  |
| Q8CA95 | <i>Pde10a</i>    | cAMP and          | High   | 14 | 8  | 10  | 8  | 790  | 89.4  | 6.6   | 175  | 74.8  | 86.5  | 84.7  | 93.3  | 127   | 133.7 |
| Q9JJ43 | <i>Rbfox1</i>    | RNA binding       | High   | 10 | 3  | 5   | 2  | 396  | 42.7  | 6.86  | 39   | 98.7  | 102.7 | 101   | 97    | 99.2  | 101.4 |
| O88441 | <i>Mtx2</i>      | Metaxin-2         | High   | 30 | 6  | 8   | 6  | 263  | 29.7  | 5.63  | 240  | 97.2  | 101.3 | 93.9  | 103.1 | 101.7 | 102.8 |
| Q8BWT1 | <i>Acaa2</i>     | 3-ketoacyl-CoA    | High   | 49 | 13 | 27  | 13 | 397  | 41.8  | 8.09  | 829  | 96.5  | 99.9  | 103.3 | 98.4  | 103.1 | 98.7  |
| Q6VNS1 | <i>Ntrk3</i>     | NT-3 growth       | High   | 11 | 8  | 10  | 4  | 825  | 92.7  | 6.67  | 160  | 100.6 | 92.4  | 96.3  | 101   | 104.4 | 105.2 |
| Q91WJ8 | <i>Fubp1</i>     | Far upstream      | High   | 26 | 15 | 17  | 13 | 651  | 68.5  | 7.93  | 199  | 100   | 97.2  | 101.9 | 99.1  | 99.9  | 101.9 |
| Q921L5 | <i>Cog2</i>      | Conserved         | High   | 2  | 1  | 1   | 1  | 731  | 82    | 6.21  | 18   |       |       |       |       |       |       |
| Q6NZK8 | <i>Ptpdc1</i>    | Protein tyrosine  | High   | 2  | 1  | 2   | 1  | 747  | 83.9  | 6.34  | 34   | 87.4  | 88.5  | 85.8  | 118.9 | 93.8  | 125.4 |
| A2AJ15 | <i>Man1b1</i>    | Endoplasmic       | Medium | 2  | 1  | 1   | 1  | 658  | 75.1  | 8.48  | 0    | 89.3  | 92.6  | 101.1 | 123.7 | 95.6  | 97.6  |
| Q8BK03 | <i>Miga2</i>     | Mitoguardin 2     | High   | 5  | 2  | 2   | 2  | 593  | 65.5  | 5.41  | 30   | 87.3  | 101.6 | 96.5  | 101.3 | 105.5 | 107.9 |
| P49935 | <i>Ctsh</i>      | Pro-cathepsin H   | High   | 15 | 3  | 3   | 3  | 333  | 37.1  | 8.4   | 74   | 115.4 | 96.7  | 151.9 | 74.9  | 77    | 84.1  |
| Q9R0M6 | <i>Rab9a</i>     | Ras-related       | High   | 25 | 4  | 5   | 4  | 201  | 22.9  | 5.66  | 98   | 99.6  | 101.3 | 101   | 101.1 | 97.6  | 99.3  |
| Q9D7G0 | <i>Prps1</i>     | Ribose-           | High   | 32 | 8  | 14  | 3  | 318  | 34.8  | 6.98  | 258  | 97.6  | 99.2  | 100.1 | 102.1 | 94.6  | 106.4 |
| P27601 | <i>Gna13</i>     | Guanine           | High   | 38 | 14 | 25  | 12 | 377  | 44    | 8.21  | 541  | 100.6 | 104.6 | 101.8 | 97.7  | 98.9  | 96.3  |
| Q8QZY9 | <i>Sf3b4</i>     | Splicing factor   | High   | 3  | 1  | 2   | 1  | 424  | 44.3  | 8.56  | 30   | 95.9  | 96.9  | 99.6  | 102.6 | 105.7 | 99.3  |

|        |                  |                   |        |    |    |    |    |      |       |       |      |       |       |       |       |       |       |
|--------|------------------|-------------------|--------|----|----|----|----|------|-------|-------|------|-------|-------|-------|-------|-------|-------|
| Q03734 | <i>Serpina3m</i> | Serine protease   | High   | 28 | 10 | 22 | 4  | 418  | 47    | 6.1   | 443  | 146.2 | 89.4  | 161.1 | 64.1  | 67.5  | 71.7  |
| Q8COL9 | <i>Gpcpd1</i>    | Glycerophospho    | High   | 3  | 2  | 2  | 2  | 675  | 76.5  | 5.58  | 26   |       |       |       |       |       |       |
| O88522 | <i>Ikbkg</i>     | NF-kappa-B        | Medium | 4  | 1  | 1  | 1  | 412  | 47.9  | 5.85  | 0    | 89.7  | 127.4 | 93.9  | 82.3  | 83.4  | 123.3 |
| Q9QY15 | <i>Dnajb2</i>    | DnaJ homolog      | High   | 22 | 6  | 7  | 5  | 324  | 35.6  | 5.91  | 185  | 96.7  | 102.5 | 96.8  | 98.6  | 102.3 | 103.1 |
| Q6ZQ82 | <i>Arhgap26</i>  | Rho GTPase-       | High   | 18 | 13 | 17 | 13 | 814  | 92    | 6.68  | 278  | 96.4  | 92.3  | 92.5  | 104.9 | 108   | 105.8 |
| Q9Z2W9 | <i>Gria3</i>     | Glutamate         | High   | 23 | 18 | 28 | 12 | 888  | 100.5 | 8.38  | 395  | 95.6  | 101.5 | 85.7  | 111.1 | 104.2 | 101.8 |
| O35684 | <i>Serpini1</i>  | Neuroserpin       | High   | 13 | 4  | 6  | 4  | 410  | 46.3  | 4.72  | 139  | 99.7  | 98.2  | 87.3  | 103.3 | 106.8 | 104.8 |
| Q9CQF3 | <i>Nudt21</i>    | Cleavage and      | High   | 27 | 7  | 7  | 7  | 227  | 26.2  | 8.82  | 85   | 98.9  | 96.5  | 101.4 | 106.8 | 99.7  | 96.7  |
| P62264 | <i>Rps14</i>     | 40S ribosomal     | High   | 29 | 4  | 12 | 4  | 151  | 16.3  | 10.05 | 205  | 106.5 | 95.4  | 114.8 | 94.6  | 96.7  | 92    |
| Q8BTW9 | <i>Pak4</i>      | Serine/threonine  | High   | 2  | 1  | 1  | 1  | 593  | 64.6  | 9.85  | 40   | 94.8  | 96.4  | 107.2 | 102.3 | 97.2  | 102   |
| Q9D9V3 | <i>Echdc1</i>    | Ethylmalonyl-     | High   | 29 | 8  | 12 | 8  | 322  | 35.4  | 7.01  | 222  | 98.3  | 103.3 | 94    | 102.3 | 98.6  | 103.5 |
| Q63739 | <i>Ptp4a1</i>    | Protein tyrosine  | High   | 32 | 5  | 5  | 2  | 173  | 19.8  | 8.97  | 85   | 99.4  | 96    | 94.1  | 105.3 | 103.5 | 101.7 |
| P60487 | <i>Pdyp</i>      | Pyridoxal         | High   | 59 | 14 | 25 | 14 | 292  | 31.5  | 5.74  | 539  | 97.1  | 95.7  | 97.7  | 103   | 102.1 | 104.3 |
| Q8BMF4 | <i>Dlat</i>      | Dihydrolypolylysi | High   | 36 | 18 | 60 | 18 | 642  | 67.9  | 8.57  | 1128 | 98.3  | 108.4 | 93.4  | 102.6 | 99.3  | 98    |
| Q3UU13 | <i>Them4</i>     | Acyl-coenzyme     | High   | 19 | 4  | 6  | 4  | 230  | 26    | 9.64  | 209  | 98.5  | 90.9  | 98.7  | 103.4 | 103.8 | 104.7 |
| Q6P8X1 | <i>Snx6</i>      | Sorting nexin-6   | High   | 30 | 13 | 16 | 12 | 406  | 46.6  | 6.16  | 242  | 97.2  | 100.3 | 101.3 | 96.7  | 101.8 | 102.7 |
| Q9DBQ9 | <i>Swt1</i>      | Transcriptional   | Medium | 2  | 1  | 1  | 1  | 907  | 103.1 | 8.22  | 0    | 101.7 | 109.8 | 102.6 | 89.1  | 94.3  | 102.3 |
| Q8K4I3 | <i>Arhgef6</i>   | Rho guanine       | High   | 5  | 4  | 5  | 2  | 771  | 87    | 5.87  | 117  | 96.9  | 99.1  | 100.1 | 99.2  | 99.4  | 105.3 |
| Q6A051 | <i>Atrnl1</i>    | Attractin-like    | Medium | 1  | 1  | 1  | 1  | 1378 | 152.4 | 7.3   | 16   | 100.6 | 99.3  | 95.2  | 99.8  | 93.9  | 111.2 |
| Q80XK6 | <i>Atg2b</i>     | Autophagy-        | High   | 4  | 8  | 9  | 8  | 2075 | 231.3 | 5.88  | 104  | 95.6  | 97.4  | 94.2  | 105   | 102.2 | 105.7 |
| P62852 | <i>Rps25</i>     | 40S ribosomal     | High   | 28 | 4  | 7  | 4  | 125  | 13.7  | 10.11 | 126  | 105.2 | 99    | 105.2 | 100.1 | 94.8  | 95.7  |
| Q80TY0 | <i>Fbnp1</i>     | Formin-binding    | High   | 19 | 10 | 12 | 10 | 616  | 71.3  | 5.67  | 176  | 94.3  | 101.6 | 101.5 | 98.6  | 95.7  | 108.2 |
| Q9Z2C4 | <i>Mtmr1</i>     | Myotubularin-     | High   | 17 | 9  | 11 | 9  | 669  | 75.3  | 6.8   | 160  | 97.8  | 97.6  | 96.4  | 105.5 | 100.6 | 102.1 |
| P70452 | <i>Stx4</i>      | Syntaxin-4        | High   | 20 | 4  | 5  | 4  | 298  | 34.1  | 6.14  | 38   | 106.6 | 106.2 | 109.1 | 91.5  | 95    | 91.6  |
| Q9JLI8 | <i>Sart3</i>     | Squamous cell     | High   | 8  | 7  | 7  | 7  | 962  | 109.6 | 5.24  | 79   | 91.8  | 99    | 97.3  | 105.2 | 102.8 | 103.9 |
| Q8VDW0 | <i>Ddx39a</i>    | ATP-dependent     | High   | 16 | 7  | 9  | 1  | 427  | 49    | 5.68  | 110  | 106.8 | 98    | 108   | 101.2 | 88.3  | 97.7  |
| Q6ZPS2 | <i>Carns1</i>    | Carnosine         | Low    | 2  | 1  | 1  | 1  | 827  | 89.2  | 6.04  | 0    |       |       |       |       |       |       |
| P56873 | <i>Znrd2</i>     | Protein ZNRD2     | Medium | 14 | 1  | 1  | 1  | 199  | 21.3  | 5.12  | 0    | 98.6  | 93    | 84.8  | 112.5 | 107.1 | 104   |
| P04627 | <i>Araf</i>      | Serine/threonine  | High   | 6  | 3  | 3  | 2  | 604  | 67.5  | 9.11  | 88   | 97.4  | 84.8  | 96.1  | 107.5 | 108   | 106.2 |
| Q9D967 | <i>Mdp1</i>      | Magnesium-        | High   | 49 | 6  | 10 | 6  | 164  | 18.6  | 6.8   | 269  | 92.7  | 94.7  | 93.2  | 101.6 | 103   | 114.8 |
| P63321 | <i>Rala</i>      | Ras-related       | High   | 53 | 10 | 20 | 5  | 206  | 23.5  | 7.11  | 449  | 94.5  | 101.7 | 90.5  | 105.2 | 106.7 | 101.4 |
| Q9Z2Z6 | <i>Slc25a20</i>  | Mitochondrial     | High   | 22 | 6  | 6  | 6  | 301  | 33    | 9.11  | 76   | 96.1  | 100.9 | 100.2 | 104.6 | 99.1  | 99.1  |
| P14576 | <i>Srp54</i>     | Signal            | High   | 32 | 12 | 16 | 12 | 504  | 55.7  | 8.75  | 378  | 97.8  | 98.3  | 105.7 | 98.3  | 100.8 | 99.1  |
| Q9Z2I0 | <i>Letm1</i>     | Mitochondrial     | High   | 39 | 25 | 43 | 25 | 738  | 82.9  | 6.52  | 1060 | 97.6  | 99.2  | 93.5  | 102.5 | 104   | 103.2 |
| A2AQ07 | <i>Tubb1</i>     | Tubulin beta-1    | High   | 14 | 7  | 57 | 1  | 451  | 50.4  | 5.07  | 652  | 88.1  | 90.3  | 98.6  | 95.1  | 101.6 | 126.2 |
| Q8BP67 | <i>Rpl24</i>     | 60S ribosomal     | High   | 30 | 6  | 13 | 6  | 157  | 17.8  | 11.25 | 227  | 102.4 | 96.8  | 107.9 | 101.8 | 96.7  | 94.5  |
| Q9DBP5 | <i>Cmpk1</i>     | UMP-CMP           | High   | 29 | 5  | 10 | 5  | 196  | 22.2  | 5.83  | 209  | 91.4  | 96    | 88    | 108.1 | 109.2 | 107.3 |
| Q03059 | <i>Chat</i>      | Choline O-        | High   | 7  | 3  | 3  | 3  | 641  | 71.8  | 7.74  | 31   | 91.1  | 99.7  | 97.2  | 98.8  | 102.6 | 110.6 |
| Q68EF0 | <i>Rab3ip</i>    | Rab-3A-           | High   | 14 | 4  | 5  | 4  | 428  | 47.1  | 6.71  | 130  | 96.5  | 98.9  | 94.4  | 102.9 | 99.5  | 107.9 |
| Q9CQA1 | <i>Trappc5</i>   | Trafficking       | High   | 24 | 5  | 6  | 5  | 188  | 20.8  | 9.66  | 70   | 94.4  | 95.3  | 89.9  | 112   | 96.7  | 111.7 |
| P97449 | <i>Anpep</i>     | Aminopeptidase    | High   | 8  | 7  | 7  | 7  | 966  | 109.6 | 5.9   | 36   | 96.9  | 101.2 | 99.9  | 97.4  | 98.7  | 105.8 |
| Q9QY42 | <i>Gpr37</i>     | Prosaposin        | High   | 4  | 2  | 2  | 2  | 600  | 66.7  | 8.12  | 61   | 93.7  | 108.2 | 102.2 | 92.7  | 97.9  | 105.3 |
| Q6ZPJ0 | <i>Tex2</i>      | Testis-expressed  | High   | 2  | 2  | 2  | 2  | 1128 | 125.1 | 5.8   | 43   | 101.9 | 102.6 | 95.7  | 96.2  | 96.5  | 107.1 |
| O88685 | <i>Psmc3</i>     | 26S proteasome    | High   | 54 | 18 | 29 | 18 | 442  | 49.5  | 5.19  | 594  | 99.6  | 100   | 96.7  | 101.4 | 101.2 | 101.1 |
| Q9QYG0 | <i>Ndrp2</i>     | Protein NDRG2     | High   | 49 | 12 | 34 | 12 | 371  | 40.8  | 5.4   | 458  | 102.9 | 100   | 95.3  | 102.5 | 99.8  | 99.6  |
| Q9R020 | <i>Zranb2</i>    | Zinc finger Ran-  | High   | 3  | 1  | 1  | 1  | 330  | 37.3  | 9.89  | 40   | 77.6  | 105.7 | 133.1 | 84.9  | 83.8  | 115   |
| Q9CQV5 | <i>Mrps24</i>    | 28S ribosomal     | High   | 7  | 1  | 1  | 1  | 167  | 18.9  | 9.76  | 30   | 93.6  | 102.6 | 103   | 103.1 | 97    | 100.6 |
| Q99KR6 | <i>Rnf34</i>     | E3 ubiquitin-     | High   | 5  | 1  | 1  | 1  | 376  | 42    | 4.84  | 55   |       |       |       |       |       |       |
| Q80U78 | <i>Pum1</i>      | Pumilio homolog   | High   | 6  | 7  | 7  | 4  | 1189 | 126.5 | 6.86  | 84   | 94.1  | 95.4  | 92.2  | 106.2 | 105.8 | 106.4 |
| Q8BR90 |                  | UPF0600 protein   | High   | 17 | 4  | 4  | 4  | 294  | 33.5  | 5.19  | 62   | 103.5 | 101.2 | 99.3  | 106.6 | 97    | 92.3  |
| O70172 | <i>Pip4k2a</i>   | Phosphatidylinos  | High   | 29 | 11 | 21 | 6  | 405  | 46.1  | 6.99  | 328  | 98.1  | 104.2 | 88.7  | 101.7 | 101.5 | 105.8 |
| O70251 | <i>Eef1b</i>     | Elongation factor | High   | 33 | 7  | 19 | 7  | 225  | 24.7  | 4.69  | 441  | 103.4 | 100.9 | 103   | 95.4  | 98.2  | 99    |
| Q5U430 | <i>Ubr3</i>      | E3 ubiquitin-     | High   | 3  | 5  | 6  | 5  | 1889 | 212.6 | 5.9   | 81   | 101.3 | 98.8  | 95    | 103.4 | 100.3 | 101.2 |
| Q91YD3 | <i>Dcp1a</i>     | mRNA-             | High   | 3  | 1  | 2  | 1  | 602  | 65.2  | 6.99  | 39   | 99.1  | 112.8 | 92.4  | 98.8  | 100.4 | 96.5  |
| P10922 | <i>H1-0</i>      | Histone H1.0      | High   | 21 | 4  | 11 | 4  | 194  | 20.8  | 10.9  | 215  | 93    | 86.7  | 106.1 | 93.5  | 107.1 | 113.6 |
| Q9D772 | <i>Fam219a</i>   | Protein           | High   | 24 | 2  | 4  | 2  | 157  | 17.5  | 4.68  | 69   | 91.2  | 100.4 | 91.5  | 102.3 | 103.5 | 111.1 |
| P62748 | <i>Hpcal1</i>    | Hippocalcin-like  | High   | 56 | 10 | 17 | 4  | 193  | 22.3  | 5.5   | 209  | 96.9  | 90.4  | 110.5 | 97.7  | 106.8 | 97.8  |
| P43006 | <i>Slc1a2</i>    | Excitatory amino  | High   | 28 | 14 | 69 | 14 | 572  | 62    | 6.68  | 1354 | 89.9  | 97.6  | 83.4  | 109.9 | 109.3 | 109.9 |
| Q9CXJ4 | <i>Abcb8</i>     | Mitochondrial     | High   | 17 | 9  | 9  | 9  | 717  | 78    | 9.07  | 159  | 96.3  | 98.5  | 97.3  | 101.9 | 104.7 | 101.3 |
| Q8BG07 | <i>Pld4</i>      | 5'-3'             | High   | 3  | 1  | 2  | 1  | 503  | 56.1  | 7.31  | 56   | 124   | 118.4 | 143.2 | 73.8  | 67.2  | 73.5  |
| Q80XI4 | <i>Pip4k2b</i>   | Phosphatidylinos  | High   | 37 | 13 | 24 | 8  | 416  | 47.3  | 7.33  | 494  | 90.1  | 94.1  | 90.9  | 105.7 | 107.4 | 111.8 |
| Q9Z2B2 | <i>Slc25a14</i>  | Brain             | Medium | 3  | 1  | 1  | 1  | 325  | 36.3  | 9.69  | 28   | 96.1  | 95.9  | 98.2  | 128.2 | 89.5  | 92.1  |
| Q8K0T4 | <i>Katnal1</i>   | Katanin p60       | High   | 17 | 8  | 12 | 8  | 488  | 55.1  | 7.09  | 135  | 98.2  | 98.1  | 99.4  | 99    | 105.6 | 99.7  |
| Q8C6E0 | <i>Cfap36</i>    | Cilia- and        | High   | 24 | 6  | 7  | 6  | 343  | 39.6  | 4.93  | 166  | 100.3 | 98    | 99.7  | 100.4 | 101.2 | 100.3 |
| Q9CY52 | <i>Thg1l</i>     | Probable          | High   | 7  | 2  | 2  | 2  | 298  | 34.9  | 8.57  | 35   | 87.2  | 101.8 | 92.8  | 91.9  | 93.1  | 133.2 |
| Q9EST3 | <i>Eif4enif1</i> | Eukaryotic        | Medium | 1  | 1  | 1  | 1  | 983  | 107.9 | 7.74  | 0    |       |       |       |       |       |       |
| P11103 | <i>Parp1</i>     | Poly [ADP-        | High   | 5  | 3  | 3  | 3  | 1013 | 113   | 8.95  | 47   | 94.1  | 91.2  | 102.3 | 108.3 | 108.8 | 95.3  |
| Q9CR39 | <i>Wdr45b</i>    | WD repeat         | High   | 14 | 4  | 5  | 3  | 344  | 38    | 7.56  | 101  | 93.2  | 98.3  | 101   | 100.2 | 104.3 | 103.1 |

|        |                 |                   |        |    |    |    |    |      |       |       |      |       |       |       |       |       |       |
|--------|-----------------|-------------------|--------|----|----|----|----|------|-------|-------|------|-------|-------|-------|-------|-------|-------|
| Q8BKE6 | <i>Cyp20a1</i>  | Cytochrome        | High   | 3  | 1  | 1  | 1  | 462  | 52.1  | 6.95  | 36   | 100.8 | 95.6  | 112.8 | 96.9  | 92.7  | 101.2 |
| Q80TA9 | <i>Epg5</i>     | Ectopic P         | High   | 2  | 5  | 5  | 5  | 2572 | 290.6 | 6.37  | 45   | 97.4  | 98.8  | 98.5  | 107.7 | 99.2  | 98.4  |
| Q91X78 | <i>Erlin1</i>   | Erlin-1 OS=Mus    | High   | 11 | 4  | 6  | 2  | 348  | 39.2  | 7.21  | 104  | 106.3 | 99    | 109.2 | 90.6  | 101.8 | 93.2  |
| Q9JKN6 | <i>Nova1</i>    | RNA-binding       | High   | 5  | 2  | 3  | 2  | 507  | 51.7  | 8.72  | 25   | 90.4  | 95.4  | 111.2 | 106.7 | 99    | 97.3  |
| O54988 | <i>Slk</i>      | STE20-like        | High   | 10 | 12 | 13 | 11 | 1233 | 141.4 | 5.14  | 190  | 95.6  | 99.7  | 97.8  | 100.3 | 102.9 | 103.7 |
| Q9JJV5 | <i>Cacng3</i>   | Voltage-          | High   | 16 | 6  | 6  | 4  | 315  | 35.5  | 9.48  | 72   | 98.8  | 100.5 | 89.1  | 108.4 | 102.1 | 101.2 |
| Q9D6Z1 | <i>Nop56</i>    | Nucleolar protein | High   | 18 | 9  | 12 | 9  | 580  | 64.4  | 9.14  | 244  | 98.5  | 97.8  | 103.5 | 98.1  | 97.5  | 104.7 |
| Q80YV3 | <i>Trrap</i>    | Transformation/tr | High   | 1  | 3  | 3  | 3  | 2565 | 291.4 | 8.48  | 32   | 98.7  | 94.3  | 97.5  | 100.9 | 97    | 111.5 |
| Q6PIX5 | <i>Rhbdf1</i>   | Inactive          | High   | 2  | 1  | 1  | 1  | 856  | 97.2  | 8.59  | 14   |       |       |       |       |       |       |
| P58389 | <i>Ptpa</i>     | Serine/threonine  | High   | 44 | 10 | 14 | 10 | 323  | 36.7  | 6.39  | 137  | 94.7  | 96.2  | 94.7  | 104.7 | 108.2 | 101.5 |
| O08692 | <i>Ngp</i>      | Neutrophilic      | High   | 29 | 4  | 6  | 4  | 167  | 19.3  | 5.31  | 88   | 111.2 | 91.8  | 186.1 | 65.1  | 74.4  | 71.5  |
| Q8K1M6 | <i>Dnm1l</i>    | Dynamins-1-like   | High   | 62 | 37 | 78 | 37 | 742  | 82.6  | 7.05  | 1855 | 94.2  | 98.9  | 98.8  | 101.1 | 103.3 | 103.7 |
| Q99K85 | <i>Psat1</i>    | Phosphoserine     | High   | 47 | 16 | 23 | 16 | 370  | 40.4  | 8.03  | 371  | 100.2 | 108.6 | 99.9  | 92.5  | 98.6  | 100.2 |
| Q9CZX9 | <i>Emc4</i>     | ER membrane       | High   | 16 | 2  | 2  | 2  | 183  | 20.1  | 8.62  | 38   | 92.3  | 91    | 94.6  | 94.1  | 94.8  | 133.2 |
| Q91WM2 | <i>Hdhd5</i>    | Haloacid          | High   | 16 | 5  | 7  | 5  | 419  | 46.3  | 7.88  | 136  | 91.2  | 96.3  | 90.4  | 110.8 | 103.9 | 107.4 |
| Q14CH7 | <i>Aars2</i>    | Alanine--tRNA     | High   | 3  | 2  | 2  | 2  | 980  | 106.7 | 6.18  | 81   | 99.7  | 93    | 94.2  | 101.7 | 102.4 | 108.8 |
| Q8R2U2 | <i>Nepro</i>    | Nucleolus and     | Low    | 1  | 1  | 1  | 1  | 564  | 63.4  | 9.94  | 0    |       |       |       |       |       |       |
| D3Z6Q9 | <i>Bin2</i>     | Bridging          | High   | 13 | 5  | 6  | 4  | 489  | 52.5  | 5.34  | 81   | 110.6 | 113.2 | 116.5 | 86.1  | 87.2  | 86.4  |
| Q9CPP0 | <i>Npm3</i>     | Nucleoplasmin-3   | High   | 9  | 1  | 1  | 1  | 175  | 19    | 4.82  | 63   |       |       |       |       |       |       |
| Q61164 | <i>Ctcf</i>     | Transcriptional   | High   | 2  | 1  | 1  | 1  | 736  | 83.7  | 6.9   | 70   | 60.5  | 51.3  | 77.5  | 131.8 | 150.9 | 128   |
| O88448 | <i>Klc2</i>     | Kinesin light     | High   | 32 | 17 | 23 | 13 | 599  | 66.6  | 7.21  | 250  | 98.8  | 101.3 | 92.8  | 103.8 | 101.8 | 101.5 |
| P16675 | <i>Ctsa</i>     | Lysosomal         | High   | 11 | 3  | 4  | 3  | 474  | 53.8  | 5.86  | 49   | 109.3 | 94.7  | 138.3 | 90.2  | 85.2  | 82.4  |
| Q9WTI7 | <i>Myo1c</i>    | Unconventional    | High   | 8  | 6  | 6  | 6  | 1063 | 121.9 | 9.35  | 107  | 104.1 | 95.9  | 123.8 | 91.1  | 95.3  | 89.7  |
| Q61704 | <i>Itih3</i>    | Inter-alpha-      | High   | 9  | 7  | 10 | 7  | 889  | 99.3  | 6.05  | 194  | 167.1 | 109   | 160   | 50    | 56.5  | 57.5  |
| P22437 | <i>Ptgs1</i>    | Prostaglandin     | High   | 3  | 1  | 1  | 1  | 602  | 69    | 6.83  | 25   |       |       |       |       |       |       |
| Q9WV18 | <i>Gabbr1</i>   | Gamma-            | High   | 17 | 14 | 20 | 14 | 960  | 108.1 | 8.21  | 378  | 98.9  | 97.6  | 92.8  | 108.7 | 102.8 | 99.2  |
| Q8K273 | <i>Mmgt1</i>    | Membrane          | High   | 7  | 1  | 1  | 1  | 131  | 14.7  | 9.16  | 50   | 107.9 | 96    | 96.8  | 99.9  | 100.3 | 99    |
| Q9EQK5 | <i>Mvp</i>      | Major vault       | High   | 8  | 5  | 5  | 5  | 861  | 95.9  | 5.59  | 99   | 112   | 106.7 | 136.2 | 76.5  | 81.5  | 87.2  |
| Q9QYB8 | <i>Add2</i>     | Beta-adducin      | High   | 36 | 18 | 37 | 17 | 725  | 80.6  | 6.21  | 618  | 95.1  | 98.9  | 94.1  | 104.8 | 104.4 | 102.6 |
| Q8R105 | <i>Vps37c</i>   | Vacuolar protein  | High   | 12 | 3  | 3  | 3  | 352  | 38.4  | 5.31  | 42   | 100.8 | 91.8  | 104.4 | 100.9 | 103.7 | 98.3  |
| P00416 | <i>mt-Co3</i>   | Cytochrome c      | High   | 5  | 1  | 2  | 1  | 261  | 29.9  | 7.3   | 0    | 97.2  | 96.8  | 97.1  | 103.3 | 105.9 | 99.7  |
| Q9DBH5 | <i>Lman2</i>    | Vesicular         | High   | 19 | 6  | 8  | 6  | 358  | 40.4  | 6.95  | 101  | 100.7 | 102.5 | 112.9 | 95    | 93.5  | 95.5  |
| P47746 | <i>Cnr1</i>     | Cannabinoid       | High   | 6  | 3  | 3  | 3  | 473  | 52.8  | 8.27  | 32   | 101.6 | 96.5  | 115.5 | 94.5  | 95.8  | 96.1  |
| Q9CQF0 | <i>Mrpl11</i>   | 39S ribosomal     | High   | 34 | 6  | 6  | 6  | 192  | 20.7  | 9.73  | 107  | 98.9  | 94.7  | 99    | 103.4 | 99.6  | 104.4 |
| Q99N94 | <i>Mrpl9</i>    | 39S ribosomal     | High   | 13 | 3  | 4  | 3  | 265  | 30.2  | 10.08 | 86   | 96.4  | 103.6 | 92    | 107.1 | 98.7  | 102.2 |
| Q9CQU5 | <i>Zwint</i>    | ZW10 interactor   | High   | 27 | 6  | 8  | 6  | 252  | 28.7  | 8.43  | 109  | 92.7  | 96.7  | 101.3 | 100.8 | 102.8 | 105.8 |
| Q91XU3 | <i>Pip4k2c</i>  | Phosphatidylinos  | High   | 26 | 8  | 12 | 8  | 421  | 47.3  | 6.89  | 124  | 98.9  | 106.6 | 88.5  | 106   | 100.3 | 99.8  |
| Q99LI7 | <i>Cstf3</i>    | Cleavage          | High   | 5  | 2  | 2  | 2  | 717  | 82.8  | 8.12  | 26   | 93.4  | 91.4  | 98    | 101.1 | 107.2 | 108.9 |
| P62881 | <i>Gnb5</i>     | Guanine           | High   | 37 | 13 | 25 | 13 | 395  | 43.5  | 6.46  | 484  | 92.9  | 101.5 | 88.4  | 108.5 | 104   | 104.7 |
| Q91ZW3 | <i>Smarca5</i>  | SWI/SNF-related   | High   | 7  | 7  | 8  | 7  | 1051 | 121.6 | 8.15  | 83   | 101.1 | 95.8  | 103.9 | 99.5  | 105.9 | 93.7  |
| Q99NB9 | <i>Sf3b1</i>    | Splicing factor   | High   | 15 | 13 | 16 | 13 | 1304 | 145.7 | 7.09  | 163  | 99.8  | 96.8  | 105.1 | 102   | 99.2  | 97    |
| Q60973 | <i>Rbbp7</i>    | Histone-binding   | High   | 9  | 4  | 4  | 1  | 425  | 47.8  | 5.05  | 58   | 108   | 103.6 | 92.6  | 101.1 | 106   | 88.7  |
| P07309 | <i>Ttr</i>      | Transthyretin     | High   | 31 | 5  | 6  | 5  | 147  | 15.8  | 6.16  | 132  | 165.6 | 66.6  | 224.4 | 45.2  | 49.8  | 48.4  |
| Q91YE7 | <i>Rbm5</i>     | RNA-binding       | High   | 4  | 3  | 3  | 2  | 815  | 92.3  | 6.21  | 27   | 94.1  | 99.4  | 90.4  | 102.3 | 106.7 | 107.1 |
| Q69Z26 | <i>Cntn4</i>    | Contactin-4       | High   | 7  | 7  | 8  | 7  | 1026 | 113.4 | 7.36  | 102  | 98.4  | 102.2 | 87.4  | 104.5 | 102.7 | 104.9 |
| Q9D6Y7 | <i>MsrA</i>     | Mitochondrial     | High   | 25 | 4  | 5  | 4  | 233  | 26    | 8.41  | 76   | 101   | 104.1 | 92.7  | 100.4 | 100.5 | 101.5 |
| Q704Y3 | <i>Trpv1</i>    | Transient         | Medium | 1  | 1  | 1  | 1  | 839  | 94.9  | 7.52  | 0    |       |       |       |       |       |       |
| Q810U3 | <i>Nfasc</i>    | Neurofascin       | High   | 29 | 30 | 53 | 30 | 1240 | 137.9 | 6.19  | 1091 | 98.9  | 107.3 | 93.7  | 101.9 | 99.4  | 98.8  |
| Q8R127 | <i>Sccpdh</i>   | Saccharopine      | High   | 24 | 8  | 12 | 8  | 429  | 47.1  | 8.6   | 196  | 111.7 | 95.4  | 121.2 | 90.8  | 87.4  | 93.5  |
| Q3V188 | <i>Endou</i>    | Poly(U)-specific  | Medium | 3  | 1  | 1  | 1  | 412  | 47    | 5.3   | 19   | 94.8  | 101.6 | 89.5  | 108.1 | 104.9 | 101.1 |
| Q8VD37 | <i>Sgip1</i>    | SH3-containing    | High   | 29 | 13 | 19 | 13 | 806  | 86    | 7.87  | 330  | 98.2  | 98.8  | 91.1  | 104.1 | 107   | 100.8 |
| Q8CHT3 | <i>Ints5</i>    | Integrator        | Low    | 1  | 1  | 1  | 1  | 1018 | 108.3 | 7.06  | 0    | 96    | 106   | 92.7  | 102.8 | 101.6 | 100.9 |
| D3YZP9 | <i>Ccdc6</i>    | Coiled-coil       | High   | 19 | 8  | 8  | 8  | 469  | 52.9  | 7.34  | 107  | 96.8  | 100.5 | 98.7  | 97.3  | 106.2 | 100.5 |
| P70195 | <i>Psmb7</i>    | Proteasome        | High   | 25 | 5  | 9  | 5  | 277  | 29.9  | 7.99  | 214  | 96.4  | 99.5  | 96.4  | 102.5 | 102.6 | 102.7 |
| Q8CIM7 | <i>Cyp2d26</i>  | Cytochrome        | High   | 2  | 1  | 2  | 1  | 500  | 56.9  | 6.64  | 86   | 97.9  | 99.9  | 103.5 | 100.9 | 99.4  | 98.3  |
| P60041 | <i>Sst</i>      | Somatostatin      | High   | 7  | 1  | 1  | 1  | 116  | 12.7  | 5.52  | 37   | 96.9  | 84.1  | 109.2 | 92.3  | 113.9 | 103.6 |
| P32020 | <i>Scp2</i>     | Non-specific      | High   | 20 | 10 | 15 | 10 | 547  | 59.1  | 7.44  | 284  | 100.5 | 102.1 | 108.2 | 96.4  | 98.4  | 94.5  |
| P58854 | <i>Tubgcp3</i>  | Gamma-tubulin     | High   | 9  | 6  | 7  | 6  | 905  | 103.4 | 8.32  | 135  | 97.5  | 94.9  | 103.6 | 93.8  | 104.2 | 106   |
| Q8K207 |                 | Uncharacterized   | High   | 26 | 3  | 3  | 3  | 121  | 13.9  | 5.22  | 30   | 97.7  | 100.5 | 93.9  | 103.1 | 102.2 | 102.6 |
| Q8BG89 | <i>Znf365</i>   | Protein ZNF365    | Medium | 2  | 1  | 1  | 1  | 408  | 46.8  | 9.14  | 19   | 88.1  | 95.8  | 98.9  | 107.9 | 103.3 | 105.9 |
| A2A7S8 | <i>Kiaa1522</i> | Uncharacterized   | High   | 2  | 1  | 1  | 1  | 1013 | 104.8 | 9.69  | 45   | 99.2  | 92.8  | 88    | 109.8 | 110.9 | 99.3  |
| Q9WV95 | <i>Phlda3</i>   | Pleckstrin        | High   | 6  | 1  | 1  | 1  | 125  | 13.7  | 9.67  | 39   | 93    | 114.7 | 99.3  | 96.7  | 102.7 | 93.6  |
| Q9DB73 | <i>Cyb5r1</i>   | NADH-             | High   | 25 | 6  | 8  | 6  | 305  | 34.1  | 8.87  | 93   | 102.8 | 104.5 | 108   | 93.4  | 99.1  | 92.4  |
| Q8BK63 | <i>Csnk1a1</i>  | Casein kinase I   | High   | 19 | 6  | 6  | 6  | 337  | 38.9  | 9.57  | 67   | 100.6 | 99.8  | 102.7 | 103.7 | 95.3  | 97.9  |
| Q9CQX2 | <i>Cyb5b</i>    | Cytochrome b5     | High   | 51 | 4  | 6  | 4  | 146  | 16.3  | 4.89  | 102  | 94.6  | 99    | 100   | 100.1 | 102.6 | 103.7 |
| Q68FE2 | <i>Atg9a</i>    | Autophagy-        | High   | 3  | 1  | 2  | 1  | 551  | 63.1  | 8.12  | 35   | 105.7 | 97.8  | 92.8  | 103.1 | 105.1 | 95.5  |
| Q9D0L7 | <i>Armc10</i>   | Armadillo repeat- | High   | 22 | 5  | 5  | 5  | 306  | 33.3  | 7.99  | 143  | 96.5  | 99.9  | 99    | 101.4 | 103.5 | 99.7  |
| P48320 | <i>Gad2</i>     | Glutamate         | High   | 32 | 13 | 20 | 12 | 585  | 65.2  | 6.9   | 355  | 97.8  | 104.2 | 104.7 | 99.5  | 96.4  | 97.4  |

|        |                  |                    |        |    |    |    |    |      |       |      |      |       |       |       |       |       |       |
|--------|------------------|--------------------|--------|----|----|----|----|------|-------|------|------|-------|-------|-------|-------|-------|-------|
| Q8C7H1 | <i>Mmaa</i>      | Methylmalonic      | High   | 15 | 6  | 6  | 6  | 415  | 45.9  | 9.32 | 68   | 99.2  | 93.2  | 104.7 | 96.5  | 103.2 | 103.2 |
| P47809 | <i>Map2k4</i>    | Dual specificity   | High   | 30 | 10 | 15 | 10 | 397  | 44.1  | 8.07 | 154  | 97.8  | 100.5 | 91.8  | 103.2 | 107.7 | 99    |
| O35887 | <i>Calu</i>      | Calumenin          | High   | 43 | 12 | 16 | 12 | 315  | 37    | 4.67 | 178  | 101.8 | 94.7  | 112.2 | 96    | 97    | 98.3  |
| O70443 | <i>Gnaz</i>      | Guanine            | High   | 43 | 13 | 28 | 12 | 355  | 40.8  | 7.61 | 641  | 96    | 98.5  | 93.7  | 105.2 | 102.6 | 104   |
| O88597 | <i>Becn1</i>     | Beclin-1           | High   | 6  | 3  | 4  | 3  | 448  | 51.6  | 4.93 | 82   | 101.4 | 106.3 | 88.9  | 100   | 99    | 104.4 |
| P70280 | <i>Vamp7</i>     | Vesicle-           | High   | 25 | 6  | 9  | 6  | 220  | 25    | 8.6  | 143  | 99.9  | 101.9 | 104   | 100   | 95.8  | 98.5  |
| Q922J6 | <i>Tspan2</i>    | Tetraspanin-2      | High   | 17 | 4  | 8  | 4  | 221  | 24.2  | 7.96 | 169  | 90.4  | 112.7 | 97    | 100.1 | 98.8  | 101.1 |
| Q80U30 | <i>Clec16a</i>   | Protein            | High   | 3  | 2  | 2  | 2  | 1036 | 116.2 | 6.05 | 33   |       |       |       |       |       |       |
| P62855 | <i>Rps26</i>     | 40S ribosomal      | High   | 31 | 3  | 7  | 3  | 115  | 13    | 11   | 140  | 102.6 | 98.5  | 101   | 102.8 | 99.7  | 95.5  |
| Q6ZQI3 | <i>Mlec</i>      | Malectin           | High   | 32 | 8  | 10 | 8  | 291  | 32.3  | 6.05 | 113  | 100.3 | 100.8 | 110.5 | 98.2  | 95.7  | 94.5  |
| Q60996 | <i>Ppp2r5c</i>   | Serine/threonine   | High   | 18 | 8  | 15 | 7  | 524  | 60.8  | 6.64 | 272  | 94.4  | 98.5  | 99.9  | 104.1 | 102   | 101.2 |
| Q8BJY1 | <i>Psmc5</i>     | 26S proteasome     | High   | 21 | 9  | 11 | 9  | 504  | 55.9  | 5.21 | 205  | 100.5 | 98.2  | 99.5  | 98.3  | 100.9 | 102.5 |
| P21278 | <i>Gna11</i>     | Guanine            | High   | 43 | 12 | 22 | 8  | 359  | 42    | 5.97 | 365  | 98    | 98.5  | 92.4  | 103.2 | 105   | 102.9 |
| Q9DBB8 | <i>Dhdh</i>      | Trans-1,2-         | High   | 10 | 3  | 3  | 3  | 333  | 36.3  | 6.44 | 59   | 106.4 | 100.6 | 100   | 97.2  | 100.4 | 95.4  |
| Q99L45 | <i>Eif2s2</i>    | Eukaryotic         | High   | 39 | 12 | 18 | 12 | 331  | 38.1  | 5.8  | 315  | 100.2 | 100.2 | 104.6 | 96.2  | 100.5 | 98.3  |
| P26516 | <i>Psmc7</i>     | 26S proteasome     | High   | 20 | 5  | 8  | 5  | 321  | 36.5  | 6.77 | 135  | 99.9  | 97.3  | 100.7 | 98.3  | 102.7 | 101.1 |
| Q8R366 | <i>Igsf8</i>     | Immunoglobulin     | High   | 20 | 9  | 15 | 9  | 611  | 65    | 7.99 | 367  | 98.2  | 107.3 | 91.4  | 100.1 | 103.2 | 99.8  |
| Q62179 | <i>Sema4b</i>    | Semaphorin-4B      | Low    | 1  | 1  | 1  | 1  | 823  | 91.3  | 8.15 | 0    | 94.5  | 101.2 | 102.7 | 99.9  | 97.7  | 103.9 |
| Q5M8N4 | <i>Sdr39u1</i>   | Epimerase          | High   | 20 | 5  | 7  | 5  | 293  | 31.4  | 9.31 | 178  | 93.2  | 99.7  | 90    | 106.2 | 106.6 | 104.3 |
| Q6P4S6 | <i>Sik3</i>      | Serine/threonine   | High   | 4  | 5  | 5  | 5  | 1311 | 145.7 | 6.92 | 72   | 95.3  | 101.5 | 92.2  | 104.5 | 102.4 | 104   |
| Q9WUA3 | <i>Pfkfb</i>     | ATP-dependent      | High   | 46 | 28 | 70 | 26 | 784  | 85.4  | 7.11 | 1490 | 99.4  | 101.5 | 100.8 | 99.9  | 100.4 | 98    |
| Q6A098 | <i>Secisbp2l</i> | Selenocysteine     | High   | 1  | 1  | 1  | 1  | 1086 | 119.6 | 6.35 | 40   | 92.7  | 104.1 | 84.5  | 103.7 | 92.9  | 122.1 |
| Q8BFW7 | <i>Lpp</i>       | Lipoma-            | Medium | 1  | 1  | 1  | 1  | 613  | 65.8  | 7.37 | 17   | 102.4 | 104.7 | 107.3 | 98.1  | 99.4  | 88.2  |
| Q8BRH4 | <i>Kmt2c</i>     | Histone-lysine N-  | Low    | 0  | 1  | 1  | 1  | 4903 | 539.8 | 6.55 | 0    | 96.6  | 101.4 | 92.8  | 102.7 | 100   | 106.6 |
| Q3UMB5 | <i>Smcr8</i>     | Guanine            | High   | 9  | 7  | 8  | 7  | 935  | 104.9 | 5.4  | 81   | 98.6  | 100.3 | 95.8  | 102.3 | 97.7  | 105.3 |
| P61226 | <i>Rap2b</i>     | Ras-related        | High   | 54 | 9  | 22 | 6  | 183  | 20.5  | 4.81 | 618  | 96.9  | 100.2 | 95.3  | 101.4 | 102.9 | 103.3 |
| O89084 | <i>Pde4a</i>     | cAMP-specific      | High   | 21 | 12 | 15 | 9  | 844  | 93.5  | 5.26 | 251  | 96.4  | 97.7  | 91.2  | 105.4 | 104.2 | 105.1 |
| A6H8H5 | <i>Kcnb2</i>     | Potassium          | High   | 3  | 2  | 2  | 1  | 907  | 102.3 | 6.1  | 45   | 103.8 | 87.5  | 103.5 | 105.6 | 98.9  | 100.7 |
| Q6ZPT1 | <i>Klhl9</i>     | Kelch-like         | High   | 2  | 1  | 1  | 1  | 617  | 69.4  | 6.44 | 51   | 98.2  | 100.5 | 103.6 | 91.6  | 106.2 | 99.9  |
| P28352 | <i>Apex1</i>     | DNA-(apurinic or   | High   | 26 | 6  | 7  | 6  | 317  | 35.5  | 7.91 | 157  | 97.9  | 97.6  | 106.8 | 96.2  | 101.2 | 100.3 |
| Q9QYH6 | <i>Maged1</i>    | Melanoma-          | High   | 5  | 4  | 4  | 3  | 775  | 85.6  | 7.5  | 54   | 98.6  | 98.1  | 97.3  | 101.1 | 101.2 | 103.7 |
| Q8VDP3 | <i>Mical1</i>    | [F-actin]-         | Medium | 1  | 1  | 1  | 1  | 1048 | 116.7 | 6.05 | 0    |       |       |       |       |       |       |
| O35449 | <i>Prrt1</i>     | Proline-rich       | High   | 12 | 3  | 6  | 3  | 306  | 31.4  | 7.65 | 144  | 91.1  | 92.7  | 106.2 | 106.7 | 105.5 | 97.9  |
| Q3UGP8 | <i>Alg10b</i>    | Putative Dol-P-    | High   | 3  | 1  | 1  | 1  | 474  | 55.4  | 9.54 | 17   | 96.2  | 93.4  | 93.7  | 118.4 | 100.9 | 97.5  |
| Q8K2A7 | <i>Ints10</i>    | Integrator         | Medium | 1  | 1  | 1  | 1  | 710  | 82    | 7.33 | 40   | 44.8  | 55    | 68.4  | 268.2 | 99.5  | 64.2  |
| Q99K28 | <i>Arfgap2</i>   | ADP-ribosylation   | High   | 14 | 6  | 6  | 6  | 520  | 56.6  | 8.18 | 107  | 94.8  | 102.4 | 99.5  | 97    | 104.2 | 102.1 |
| Q5NCE8 | <i>Mrs2</i>      | Magnesium          | High   | 7  | 2  | 3  | 2  | 434  | 49.3  | 7.53 | 67   | 103.1 | 111.1 | 85.9  | 101.8 | 92.6  | 105.5 |
| Q91VJ5 | <i>Pqbp1</i>     | Polyglutamine-     | Medium | 3  | 1  | 1  | 1  | 263  | 30.6  | 6.23 | 14   | 96.5  | 103.9 | 88.8  | 100.6 | 105   | 105.2 |
| Q5IXF8 | <i>Glp2r</i>     | Glucagon-like      | Medium | 3  | 1  | 1  | 1  | 512  | 59.1  | 8.9  | 0    |       |       |       |       |       |       |
| O70493 | <i>Snx12</i>     | Sorting nexin-12   | High   | 43 | 7  | 14 | 5  | 165  | 19.1  | 7.34 | 131  | 95.1  | 95.4  | 98.3  | 104.9 | 103   | 103.3 |
| Q9DC69 | <i>Ndufa9</i>    | NADH               | High   | 35 | 11 | 21 | 11 | 377  | 42.5  | 9.74 | 465  | 94.1  | 102.4 | 91.3  | 102.2 | 104.6 | 105.4 |
| Q61749 | <i>Eif2b4</i>    | Translation        | High   | 5  | 3  | 3  | 3  | 524  | 57.6  | 9.25 | 33   | 96.2  | 96.6  | 103.9 | 102.2 | 102.2 | 98.9  |
| Q8K0B2 | <i>Lmbrd1</i>    | Lysosomal          | High   | 3  | 1  | 1  | 1  | 537  | 61    | 7.53 | 77   | 110.2 | 92.5  | 100.6 | 106.9 | 85.3  | 104.4 |
| Q9JJK1 | <i>Stx6</i>      | Syntaxin-6         | High   | 40 | 7  | 11 | 7  | 255  | 29    | 4.92 | 139  | 98.2  | 102.3 | 93.3  | 103.2 | 101.2 | 101.8 |
| Q9JII1 | <i>Inpp5e</i>    | Phosphatidylinos   | High   | 1  | 1  | 1  | 1  | 647  | 71.9  | 9.19 | 39   | 97.6  | 98.5  | 90.3  | 99.7  | 95    | 118.9 |
| Q99JI4 | <i>Psmc6</i>     | 26S proteasome     | High   | 40 | 14 | 19 | 14 | 389  | 45.5  | 5.52 | 177  | 96.9  | 99    | 100.5 | 102.5 | 98.5  | 102.6 |
| Q8BUR4 | <i>Dock1</i>     | Dedicator of       | High   | 3  | 6  | 6  | 5  | 1865 | 214.9 | 7.62 | 82   | 100.7 | 104.7 | 114.1 | 89.9  | 91    | 99.6  |
| Q3UGR5 | <i>Hdhd2</i>     | Haloacid           | High   | 22 | 6  | 11 | 6  | 259  | 28.7  | 6.05 | 213  | 98.4  | 102.8 | 97    | 100.7 | 101   | 100.1 |
| Q9CQH3 | <i>Ndufb5</i>    | NADH               | High   | 21 | 5  | 14 | 5  | 189  | 21.7  | 9.41 | 267  | 96.4  | 103.2 | 87.8  | 105.3 | 104.6 | 102.7 |
| Q7TSV4 | <i>Pgm2</i>      | Phosphoglucom      | High   | 5  | 3  | 4  | 3  | 620  | 68.7  | 6.14 | 46   | 96.4  | 102.4 | 110.1 | 91.9  | 98.9  | 100.4 |
| O35295 | <i>Purb</i>      | Transcriptional    | High   | 49 | 8  | 15 | 7  | 324  | 33.9  | 5.43 | 274  | 93    | 94.1  | 97.9  | 108.8 | 101.1 | 105.1 |
| Q8K135 | <i>Kiaa0319l</i> | Dyslexia-          | Low    | 1  | 1  | 1  | 1  | 1048 | 115.2 | 6.16 | 19   | 104.4 | 92.7  | 91.5  | 104.8 | 106.2 | 100.4 |
| Q11011 | <i>Npepps</i>    | Puromycin-         | High   | 46 | 36 | 64 | 36 | 920  | 103.3 | 5.9  | 804  | 97.7  | 101.7 | 93    | 101.4 | 104   | 102.2 |
| Q9CQD1 | <i>Rab5a</i>     | Ras-related        | High   | 72 | 10 | 26 | 7  | 215  | 23.6  | 8.15 | 680  | 95.7  | 98    | 95.1  | 105   | 103.1 | 103   |
| Q8VDT9 | <i>Mrpl50</i>    | 39S ribosomal      | High   | 18 | 3  | 4  | 3  | 159  | 18.2  | 9.33 | 45   | 100.1 | 91    | 95.4  | 106.4 | 97.2  | 109.9 |
| Q8BM65 | <i>Nyap2</i>     | Neuronal           | High   | 4  | 2  | 2  | 2  | 682  | 73.9  | 8.72 | 59   | 78.3  | 107.5 | 97    | 105.7 | 98.1  | 113.4 |
| P28271 | <i>Aco1</i>      | Cytoplasmic        | High   | 28 | 19 | 24 | 19 | 889  | 98.1  | 7.5  | 358  | 100.1 | 98.7  | 99.3  | 100.2 | 101   | 100.7 |
| Q8BTI9 | <i>Pik3cb</i>    | Phosphatidylinos   | High   | 4  | 3  | 3  | 3  | 1064 | 121.6 | 7.09 | 34   | 94.2  | 95.5  | 104.3 | 99.2  | 110.3 | 96.6  |
| Q61191 | <i>Hcfc1</i>     | Host cell factor 1 | High   | 6  | 11 | 12 | 11 | 2045 | 210.3 | 7.18 | 110  | 97.9  | 97.6  | 99.8  | 101.3 | 98.4  | 105   |
| Q9Z1X4 | <i>Ilf3</i>      | Interleukin        | High   | 21 | 16 | 23 | 12 | 898  | 96    | 8.76 | 355  | 99.7  | 96.4  | 100.9 | 99.7  | 104.1 | 99.1  |
| Q5NCX5 | <i>Neurl4</i>    | Neuralized-like    | Medium | 1  | 1  | 1  | 1  | 1563 | 167.5 | 5.95 | 20   | 95.4  | 92.2  | 89.3  | 114.7 | 101   | 107.4 |
| Q9QX47 | <i>Son</i>       | Protein SON        | High   | 3  | 5  | 5  | 5  | 2444 | 265.5 | 5.6  | 86   | 97.6  | 105.9 | 96.9  | 97.2  | 96.5  | 105.9 |
| Q9QXW9 | <i>Slc7a8</i>    | Large neutral      | High   | 5  | 3  | 5  | 3  | 531  | 57.8  | 6.67 | 72   | 92.2  | 94.4  | 96.2  | 114   | 98    | 105.2 |
| Q8BKT7 | <i>Thoc5</i>     | THO complex        | Medium | 1  | 1  | 1  | 1  | 683  | 78.6  | 7.12 | 0    |       |       |       |       |       |       |
| O35683 | <i>Ndufa1</i>    | NADH               | High   | 14 | 1  | 2  | 1  | 70   | 8.1   | 9.48 | 59   | 94.6  | 104.3 | 85.9  | 104.2 | 110.9 | 100   |
| Q99LS3 | <i>Psph</i>      | Phosphoserine      | High   | 17 | 4  | 5  | 4  | 225  | 25.1  | 6.14 | 149  | 100.1 | 108   | 103.8 | 93    | 98.1  | 97    |
| Q9ROX4 | <i>Acot9</i>     | Acyl-coenzyme      | High   | 31 | 12 | 18 | 12 | 439  | 50.5  | 8.59 | 262  | 93.1  | 100.9 | 90.5  | 106.4 | 104.3 | 104.8 |
| Q8BMQ8 | <i>Mon1b</i>     | Vacuolar fusion    | High   | 3  | 1  | 2  | 1  | 553  | 60    | 5.57 | 90   | 89.3  | 101.1 | 92.6  | 110.1 | 93.8  | 113.2 |

|        |                 |                  |        |    |    |    |    |      |       |       |      |       |       |       |       |       |       |
|--------|-----------------|------------------|--------|----|----|----|----|------|-------|-------|------|-------|-------|-------|-------|-------|-------|
| O08808 | <i>Diaph1</i>   | Protein          | High   | 8  | 8  | 9  | 8  | 1255 | 139.3 | 5.57  | 106  | 100.1 | 96.3  | 103.8 | 101.4 | 100.9 | 97.6  |
| Q60936 | <i>Coq8a</i>    | Atypical kinase  | High   | 5  | 3  | 3  | 3  | 645  | 71.7  | 6.54  | 30   | 105.6 | 106.4 | 90.6  | 95.7  | 102.4 | 99.2  |
| Q80Y14 | <i>Glrx5</i>    | Glutaredoxin-    | High   | 22 | 2  | 4  | 2  | 152  | 16.3  | 6.55  | 78   | 98.1  | 96.6  | 94.8  | 100.9 | 102.1 | 107.6 |
| Q8JZY2 | <i>Comm10</i>   | COMM domain-     | High   | 4  | 1  | 1  | 1  | 202  | 22.8  | 6.65  | 27   | 100   | 103.6 | 95    | 95    | 106.7 | 99.6  |
| O35593 | <i>Psm14</i>    | 26S proteasome   | High   | 35 | 6  | 8  | 6  | 310  | 34.6  | 6.52  | 127  | 102.9 | 107.8 | 100.7 | 98.6  | 94.1  | 95.9  |
| Q8K4X7 | <i>Agpat4</i>   | 1-acyl-sn-       | High   | 11 | 4  | 6  | 4  | 378  | 43.8  | 8.38  | 57   | 99.3  | 101.7 | 101.8 | 99    | 100.1 | 98.1  |
| Q07646 | <i>Mest</i>     | Mesoderm-        | Medium | 2  | 1  | 1  | 1  | 335  | 38.9  | 9.74  | 26   | 99.5  | 97.3  | 89.6  | 110.3 | 107.1 | 96.2  |
| O35495 | <i>Cdk14</i>    | Cyclin-          | High   | 12 | 5  | 6  | 4  | 469  | 53    | 8.92  | 55   | 93.9  | 97.4  | 100.3 | 102.4 | 104   | 102   |
| O08638 | <i>Myh11</i>    | Myosin-11        | High   | 22 | 39 | 54 | 23 | 1972 | 226.9 | 5.45  | 875  | 106.5 | 98.9  | 103.6 | 87.6  | 100.6 | 102.7 |
| Q8CCB4 | <i>Vps53</i>    | Vacuolar protein | High   | 21 | 13 | 16 | 13 | 832  | 94.4  | 6.61  | 255  | 98.7  | 100.4 | 96.2  | 99.9  | 100.6 | 104.1 |
| Q9D0M5 | <i>Dynll2</i>   | Dynein light     | High   | 45 | 3  | 24 | 2  | 89   | 10.3  | 7.37  | 498  | 98    | 102   | 86.1  | 104.2 | 108.3 | 101.4 |
| Q9D385 | <i>Arl2bp</i>   | ADP-ribosylation | Medium | 6  | 1  | 1  | 1  | 163  | 18.7  | 4.32  | 0    | 104.8 | 106.2 | 106.7 | 97.5  | 92.2  | 92.7  |
| Q80Z24 | <i>Negr1</i>    | Neuronal growth  | High   | 30 | 7  | 21 | 7  | 348  | 37.9  | 6.52  | 524  | 94.4  | 91.9  | 87    | 111.6 | 111   | 104.1 |
| Q641K1 | <i>Agtpbp1</i>  | Cytosolic        | High   | 3  | 2  | 2  | 2  | 1218 | 137.1 | 6.52  | 58   | 96.8  | 100.6 | 86.7  | 102   | 101.6 | 112.2 |
| Q60605 | <i>Myl6</i>     | Myosin light     | High   | 54 | 7  | 13 | 6  | 151  | 16.9  | 4.65  | 233  | 102.3 | 99.6  | 113.8 | 93.2  | 96.7  | 94.5  |
| O35737 | <i>Hnrmp1</i>   | Heterogeneous    | High   | 39 | 13 | 27 | 5  | 449  | 49.2  | 6.3   | 529  | 97.3  | 96.4  | 103.1 | 96.6  | 105.1 | 101.6 |
| Q9DBF1 | <i>Aldh7a1</i>  | Alpha-           | High   | 35 | 15 | 28 | 15 | 539  | 58.8  | 7.47  | 587  | 103.5 | 101.4 | 105.3 | 93.5  | 98.4  | 97.9  |
| Q9EQZ6 | <i>Rapgef4</i>  | Rap guanine      | High   | 16 | 15 | 20 | 14 | 1011 | 115.4 | 6.92  | 303  | 101.8 | 97.8  | 98.7  | 100.3 | 99.6  | 101.8 |
| P61255 | <i>Rpl26</i>    | 60S ribosomal    | High   | 23 | 5  | 7  | 5  | 145  | 17.2  | 10.55 | 124  | 103.5 | 98.6  | 104.4 | 101.7 | 96.9  | 94.9  |
| Q9D6M3 | <i>Slc25a22</i> | Mitochondrial    | High   | 45 | 11 | 31 | 9  | 323  | 34.6  | 9.09  | 449  | 92.1  | 96.3  | 98.1  | 104.1 | 105   | 104.4 |
| Q9Z1W9 | <i>Stk39</i>    | STE20/SPS1-      | High   | 15 | 6  | 8  | 5  | 556  | 60.3  | 6.29  | 164  | 96.4  | 107.2 | 93.3  | 106.2 | 96    | 101   |
| P63034 | <i>Cyth2</i>    | Cytohesin-2      | High   | 32 | 10 | 13 | 7  | 400  | 46.6  | 5.63  | 129  | 100.1 | 99.6  | 96.2  | 102.2 | 99.7  | 102.2 |
| P97429 | <i>Anxa4</i>    | Annexin A4       | High   | 36 | 9  | 12 | 8  | 319  | 35.9  | 5.57  | 247  | 112.2 | 104.5 | 136.7 | 78.5  | 84.5  | 83.5  |
| Q9Z1R2 | <i>Bag6</i>     | Large proline-   | High   | 10 | 9  | 13 | 9  | 1154 | 121   | 5.71  | 244  | 94    | 100.2 | 96.2  | 101.4 | 104.3 | 103.9 |
| Q62276 | <i>Med22</i>    | Mediator of RNA  | High   | 6  | 1  | 2  | 1  | 200  | 22.3  | 4.68  | 28   | 104.3 | 105.4 | 101.8 | 90.2  | 93.7  | 104.6 |
| Q99LC2 | <i>Cstf1</i>    | Cleavage         | High   | 4  | 2  | 2  | 2  | 431  | 48.4  | 6.58  | 25   | 95.5  | 100.2 | 101.7 | 98.5  | 103.8 | 100.3 |
| P97493 | <i>Txn2</i>     | Thioredoxin,     | High   | 37 | 3  | 6  | 3  | 166  | 18.2  | 7.9   | 87   | 96    | 98    | 92.3  | 105.2 | 104.4 | 104.1 |
| P04925 | <i>Prnp</i>     | Major prion      | High   | 12 | 3  | 6  | 3  | 254  | 28    | 9.33  | 139  | 98.6  | 94.3  | 107.7 | 101.2 | 95.1  | 103   |
| Q9DBZ5 | <i>Eif3k</i>    | Eukaryotic       | High   | 23 | 4  | 4  | 4  | 218  | 25.1  | 4.93  | 62   | 100.2 | 110.1 | 100.7 | 94.3  | 102   | 92.6  |
| P23819 | <i>Gria2</i>    | Glutamate        | High   | 43 | 35 | 58 | 30 | 883  | 98.6  | 7.39  | 1132 | 95.6  | 101.1 | 92.1  | 107.6 | 102.6 | 101   |
| P27659 | <i>Rpl3</i>     | 60S ribosomal    | High   | 26 | 12 | 20 | 12 | 403  | 46.1  | 10.21 | 270  | 108.1 | 100.6 | 103.8 | 96.8  | 96.6  | 94.2  |
| P41969 | <i>Elk1</i>     | ETS domain-      | Medium | 3  | 1  | 1  | 1  | 429  | 45.2  | 6.8   | 25   | 92    | 84.2  | 103.4 | 111.5 | 92.1  | 116.8 |
| Q8VI51 | <i>Sorcs3</i>   | VPS10 domain-    | High   | 4  | 3  | 3  | 3  | 1219 | 135.9 | 6.49  | 19   | 94.8  | 92.7  | 87.9  | 103.4 | 112.2 | 108.9 |
| Q9EQP2 | <i>Ehd4</i>     | EH domain-       | High   | 22 | 10 | 12 | 6  | 541  | 61.4  | 6.76  | 276  | 105.3 | 104.2 | 120.5 | 86.1  | 91.8  | 92    |
| Q8BFY6 | <i>Pef1</i>     | Peflin OS=Mus    | High   | 18 | 5  | 8  | 5  | 275  | 29.2  | 6.3   | 120  | 95.5  | 102.4 | 98.9  | 103.4 | 98.7  | 101   |
| Q99JB8 | <i>Pacsin3</i>  | Protein kinase C | High   | 13 | 4  | 5  | 4  | 424  | 48.6  | 6.1   | 66   | 95.4  | 97.7  | 103.4 | 102   | 97.2  | 104.4 |
| Q5DTX6 | <i>Jcad</i>     | Junctional       | High   | 2  | 2  | 2  | 2  | 1320 | 144.7 | 6.52  | 43   | 90.7  | 100.4 | 87.8  | 105   | 110   | 106   |
| Q8VEH5 | <i>Epm2aip1</i> | EPM2A-           | High   | 16 | 7  | 10 | 7  | 606  | 70.1  | 5.87  | 152  | 99.5  | 94.4  | 96.2  | 107.6 | 99.6  | 102.7 |
| Q9CZN8 | <i>Qrs1</i>     | Glutamyl-        | High   | 9  | 3  | 3  | 3  | 525  | 56.7  | 5.95  | 48   | 96.1  | 101.1 | 95.8  | 99.7  | 103.4 | 104   |
| Q8CBY8 | <i>Dctn4</i>    | Dynactin subunit | High   | 31 | 10 | 16 | 10 | 467  | 53    | 7.72  | 307  | 100   | 102.3 | 90.5  | 103   | 103.3 | 100.9 |
| Q9QUP5 | <i>Hapln1</i>   | Hyaluronan and   | High   | 39 | 11 | 13 | 11 | 356  | 40.5  | 7.8   | 178  | 101.7 | 107.7 | 100   | 100.4 | 95.5  | 94.7  |
| Q6PGL7 | <i>Washc2</i>   | WASH complex     | High   | 12 | 11 | 13 | 11 | 1334 | 145.2 | 4.77  | 141  | 102.5 | 99.7  | 100.2 | 95.5  | 101.1 | 101   |
| Q8JZU2 | <i>Slc25a1</i>  | Tricarboxylate   | High   | 22 | 7  | 10 | 7  | 311  | 33.9  | 9.89  | 131  | 91.2  | 99.6  | 97.5  | 103.7 | 103.5 | 104.6 |
| O35066 | <i>Kif3c</i>    | Kinesin-like     | High   | 6  | 4  | 6  | 1  | 796  | 89.9  | 8.06  | 108  | 94.7  | 98.1  | 91.8  | 104   | 97.3  | 114.2 |
| Q80WG5 | <i>Lrrc8a</i>   | Volume-          | High   | 16 | 10 | 12 | 9  | 810  | 94.1  | 7.94  | 204  | 107.4 | 111.6 | 112.8 | 87    | 91.3  | 89.9  |
| Q8BMQ2 | <i>Gtf3c4</i>   | General          | High   | 3  | 2  | 3  | 2  | 817  | 91.6  | 6.73  | 27   | 101.6 | 91.8  | 103.7 | 97.2  | 105.5 | 100.2 |
| O88622 | <i>Parg</i>     | Poly(ADP-        | Medium | 1  | 1  | 1  | 1  | 969  | 109.3 | 6.9   | 0    | 94.9  | 104.3 | 94.2  | 96.2  | 107.1 | 103.3 |
| O35071 | <i>Kif1c</i>    | Kinesin-like     | High   | 6  | 7  | 8  | 2  | 1100 | 122.4 | 7.03  | 92   | 101.5 | 104.4 | 106.1 | 93.2  | 100.6 | 94.1  |
| Q8BK30 | <i>Ndufv3</i>   | NADH             | High   | 37 | 3  | 5  | 3  | 104  | 11.8  | 9.35  | 94   | 92.7  | 103.3 | 96.7  | 106.7 | 107.5 | 93    |
| Q9D0Q7 | <i>Mrpl45</i>   | 39S ribosomal    | High   | 8  | 3  | 3  | 3  | 306  | 35.4  | 9.23  | 41   | 95.2  | 103.9 | 105.9 | 96.2  | 100.8 | 98.1  |
| Q8CBX0 | <i>Tmem63c</i>  | Calcium          | High   | 2  | 2  | 2  | 2  | 802  | 93    | 7.77  | 15   | 109.5 | 86.7  | 114.6 | 93.9  | 97.5  | 97.9  |
| P62746 | <i>Rhob</i>     | Rho-related      | High   | 32 | 6  | 14 | 5  | 196  | 22.1  | 5.24  | 337  | 96.9  | 99.6  | 106.8 | 103.8 | 93.8  | 99    |
| P60840 | <i>Ensa</i>     | Alpha-           | High   | 46 | 6  | 10 | 5  | 121  | 13.3  | 7.24  | 137  | 97.4  | 96.6  | 95.7  | 104.2 | 102.6 | 103.5 |
| Q6IR34 | <i>Gpsm1</i>    | G-protein-       | High   | 8  | 5  | 5  | 5  | 673  | 74.3  | 6.23  | 45   | 92.5  | 96.8  | 91.7  | 103.5 | 104.6 | 110.9 |
| Q62348 | <i>Tsn</i>      | Translin         | High   | 19 | 5  | 5  | 5  | 228  | 26.2  | 6.44  | 55   | 97.9  | 94.5  | 100   | 106.5 | 97.9  | 103.1 |
| Q8BRK9 | <i>Man2a2</i>   | Alpha-           | High   | 1  | 1  | 1  | 1  | 1152 | 130.6 | 6.87  | 0    | 96.6  | 106.5 | 98.8  | 101.8 | 91.1  | 105.3 |
| Q9R190 | <i>Mta2</i>     | Metastasis-      | High   | 11 | 6  | 6  | 5  | 668  | 75    | 9.67  | 93   | 96.3  | 99.7  | 87.5  | 102.8 | 104.3 | 109.5 |
| Q6QWF9 | <i>Camk2n1</i>  | Calcium/calmod   | High   | 69 | 4  | 5  | 4  | 78   | 8.5   | 5.45  | 124  | 93.6  | 91.8  | 80.9  | 116.6 | 106.3 | 110.7 |
| Q8BJW6 | <i>Eif2a</i>    | Eukaryotic       | High   | 10 | 5  | 5  | 5  | 581  | 64.4  | 8.91  | 45   | 99.5  | 100   | 98.2  | 98.3  | 101.2 | 102.6 |
| Q5SNZ0 | <i>Ccdc88a</i>  | Girdin OS=Mus    | High   | 7  | 11 | 11 | 11 | 1873 | 215.8 | 6.24  | 152  | 96.4  | 98.7  | 97.1  | 97.8  | 102.7 | 107.3 |
| Q8BTE0 | <i>Sdhaf4</i>   | Succinate        | Medium | 15 | 1  | 1  | 1  | 104  | 11.9  | 9.5   | 0    | 104.1 | 94.4  | 104.3 | 102.2 | 104.2 | 90.9  |
| Q6VN19 | <i>Ranbp10</i>  | Ran-binding      | High   | 3  | 1  | 1  | 1  | 620  | 67.1  | 6.58  | 0    |       |       |       |       |       |       |
| P20065 | <i>Tmsb4x</i>   | Thymosin beta-4  | High   | 38 | 2  | 4  | 1  | 50   | 5.7   | 5.06  | 46   | 98.4  | 88.8  | 133.3 | 72.8  | 106.4 | 100.4 |
| Q8VE85 | <i>Prelid3a</i> | PRELI domain     | High   | 14 | 2  | 2  | 2  | 172  | 19    | 7.91  | 64   | 99.9  | 98.7  | 93.8  | 108.7 | 97.9  | 100.9 |
| Q8CDA1 | <i>Inpp5f</i>   | Phosphatidylinos | High   | 2  | 2  | 2  | 2  | 1132 | 127.5 | 7.11  | 0    | 95.2  | 105.8 | 90.3  | 111.1 | 101.2 | 96.3  |
| Q8CHP8 | <i>Pgp</i>      | Glycerol-3-      | High   | 35 | 8  | 15 | 8  | 321  | 34.5  | 5.35  | 270  | 91.6  | 100.7 | 93.9  | 101.8 | 103.7 | 108.2 |
| Q9CPQ3 | <i>Tomm22</i>   | Mitochondrial    | High   | 48 | 4  | 10 | 4  | 142  | 15.5  | 4.34  | 192  | 96.3  | 101   | 92.1  | 100.7 | 104.1 | 105.9 |
| Q8C460 | <i>Eri3</i>     | ERI1             | Medium | 3  | 1  | 1  | 1  | 337  | 37.2  | 8.07  | 20   |       |       |       |       |       |       |

|        |                 |                   |        |    |    |     |    |      |       |       |      |       |       |       |       |       |       |
|--------|-----------------|-------------------|--------|----|----|-----|----|------|-------|-------|------|-------|-------|-------|-------|-------|-------|
| Q6ZWN5 | <i>Rps9</i>     | 40S ribosomal     | High   | 44 | 10 | 16  | 10 | 194  | 22.6  | 10.65 | 161  | 103.2 | 100.1 | 101.6 | 99.7  | 99.4  | 96.1  |
| Q07456 | <i>Ambp</i>     | Protein AMBP      | High   | 5  | 2  | 4   | 2  | 349  | 39    | 6.32  | 67   | 176.1 | 74.2  | 170.8 | 54.9  | 60.7  | 63.2  |
| Q6PDM2 | <i>Srsf1</i>    | Serine/arginine-  | High   | 41 | 11 | 19  | 11 | 248  | 27.7  | 10.36 | 282  | 102.4 | 96.8  | 105   | 101.2 | 97.6  | 97.1  |
| Q8K479 | <i>C1qtnf5</i>  | Complement        | Low    | 9  | 1  | 1   | 1  | 243  | 25.4  | 6.68  | 0    |       |       |       |       |       |       |
| Q6PE15 | <i>Abhd10</i>   | Palmitoyl-protein | High   | 24 | 7  | 7   | 7  | 297  | 33    | 8.79  | 101  | 92.3  | 97.2  | 91.5  | 107.3 | 103.5 | 108.1 |
| Q8BFV2 | <i>Pcid2</i>    | PCI domain-       | High   | 7  | 2  | 3   | 2  | 399  | 46.1  | 8.53  | 40   | 109.4 | 95.8  | 109.6 | 91.5  | 100.3 | 93.4  |
| Q8BGX2 | <i>Timm29</i>   | Mitochondrial     | High   | 23 | 4  | 5   | 4  | 266  | 29.4  | 6.73  | 124  | 92.9  | 90.8  | 88.6  | 110   | 110.2 | 107.5 |
| Q8BWG8 | <i>Arrb1</i>    | Beta-arrestin-1   | High   | 24 | 8  | 12  | 8  | 418  | 46.9  | 6.28  | 125  | 100.7 | 99.4  | 109   | 95    | 97.2  | 98.7  |
| Q91V14 | <i>Slc12a5</i>  | Solute carrier    | High   | 27 | 25 | 61  | 19 | 1138 | 126.2 | 6.74  | 975  | 95.5  | 101.8 | 85    | 109.6 | 103.4 | 104.7 |
| P08249 | <i>Mdh2</i>     | Malate            | High   | 58 | 17 | 134 | 17 | 338  | 35.6  | 8.68  | 3350 | 91.1  | 99.6  | 85.9  | 121.2 | 100.4 | 101.7 |
| P24638 | <i>Acp2</i>     | Lysosomal acid    | Medium | 2  | 1  | 1   | 1  | 423  | 48.5  | 7.02  | 21   | 103   | 99.4  | 99.2  | 102.3 | 90.5  | 105.7 |
| Q6ZWY8 | <i>Tmsb10</i>   | Thymosin beta-    | High   | 48 | 2  | 5   | 1  | 44   | 5     | 5.36  | 63   | 112   | 104.3 | 156.3 | 72    | 81.7  | 73.7  |
| Q9QXJ4 | <i>Arl10</i>    | ADP-ribosylation  | High   | 12 | 2  | 2   | 2  | 243  | 27.3  | 4.82  | 40   |       |       |       |       |       |       |
| Q8VIM9 | <i>Irgq</i>     | Immunity-related  | High   | 14 | 5  | 7   | 5  | 583  | 59.3  | 4.83  | 167  | 94.6  | 102.2 | 89.8  | 102.6 | 100.9 | 109.8 |
| Q9WVQ1 | <i>Magl2</i>    | Membrane-         | High   | 11 | 12 | 13  | 12 | 1275 | 140.8 | 6.19  | 165  | 94.4  | 103.4 | 87.5  | 107.1 | 102.5 | 105.1 |
| Q8CBC4 | <i>Cnst</i>     | Consortin         | High   | 5  | 2  | 2   | 2  | 711  | 76.8  | 4.59  | 76   | 93.1  | 102.6 | 93.9  | 99.2  | 103.3 | 108   |
| P56391 | <i>Cox6b1</i>   | Cytochrome c      | High   | 63 | 6  | 24  | 6  | 86   | 10.1  | 8.72  | 394  | 96.2  | 99.8  | 92.9  | 100.2 | 107   | 103.9 |
| O88952 | <i>Lin7c</i>    | Protein lin-7     | High   | 43 | 7  | 11  | 4  | 197  | 21.8  | 8.43  | 239  | 99.5  | 99.5  | 106.9 | 97.9  | 94.8  | 101.5 |
| Q99JN2 | <i>Klhl22</i>   | Kelch-like        | High   | 9  | 5  | 6   | 5  | 634  | 71.6  | 5.71  | 45   | 96.6  | 100   | 98.8  | 104.3 | 95    | 105.3 |
| Q921H8 | <i>Acaa1a</i>   | 3-ketoacyl-CoA    | High   | 39 | 12 | 16  | 12 | 424  | 43.9  | 8.44  | 387  | 104.2 | 99.7  | 106.4 | 95    | 98.5  | 96.3  |
| Q8BKH7 | <i>Mapkap1</i>  | Target of         | Low    | 1  | 1  | 1   | 1  | 522  | 59    | 7.53  | 0    |       |       |       |       |       |       |
| A2A690 | <i>Tanc2</i>    | Protein TANC2     | High   | 12 | 18 | 20  | 18 | 1994 | 220.1 | 7.97  | 319  | 95.8  | 98.1  | 93.4  | 102.9 | 105.1 | 104.7 |
| O08848 | <i>RO60</i>     | 60 kDa SS-A/Ro    | High   | 10 | 5  | 8   | 5  | 538  | 60.1  | 7.9   | 113  | 101   | 98.8  | 97.4  | 101.4 | 101.8 | 99.7  |
| P01899 | <i>H2-D1</i>    | H-2 class I       | High   | 25 | 8  | 10  | 5  | 362  | 40.8  | 6.73  | 125  | 99.3  | 109.4 | 141.3 | 81.9  | 78.6  | 89.4  |
| Q69ZS0 | <i>Pdzrn3</i>   | E3 ubiquitin-     | Low    | 2  | 1  | 1   | 1  | 1063 | 119.3 | 6.05  | 0    | 90    | 97.9  | 87    | 100   | 108.9 | 116.1 |
| Q3TBT3 | <i>Sting1</i>   | Stimulator of     | High   | 9  | 2  | 2   | 2  | 378  | 42.8  | 7.42  | 57   | 79.7  | 108.4 | 97.6  | 105.3 | 99.2  | 109.8 |
| Q99NE5 | <i>Rims1</i>    | Regulating        | High   | 17 | 19 | 25  | 18 | 1463 | 163.1 | 9.42  | 284  | 95.5  | 100.6 | 86.5  | 106.3 | 107.1 | 104   |
| Q5DTT2 | <i>Psd</i>      | PH and SEC7       | High   | 12 | 11 | 12  | 11 | 1024 | 109.6 | 7.05  | 121  | 94.7  | 98.2  | 92.1  | 109.2 | 102.5 | 103.3 |
| Q99J45 | <i>Nrbp1</i>    | Nuclear           | High   | 11 | 4  | 6   | 4  | 535  | 59.8  | 5.08  | 115  | 93.5  | 101.8 | 98.7  | 102.6 | 103.6 | 99.7  |
| Q99JP4 | <i>Cdc26</i>    | Anaphase-         | Medium | 11 | 1  | 1   | 1  | 85   | 9.8   | 6.81  | 29   |       |       |       |       |       |       |
| Q77NG5 | <i>Eml2</i>     | Echinoderm        | High   | 12 | 6  | 8   | 6  | 649  | 70.7  | 6.28  | 147  | 100.1 | 106.7 | 100.5 | 97.7  | 96.5  | 98.5  |
| Q80TL1 | <i>Adcy2</i>    | Adenylate         | High   | 4  | 4  | 5   | 4  | 1090 | 123.2 | 8.31  | 93   | 92.4  | 107.5 | 89.3  | 105.7 | 99.2  | 105.9 |
| Q3UMG5 | <i>Lrch2</i>    | Leucine-rich      | Medium | 1  | 1  | 1   | 1  | 773  | 84.9  | 6.58  | 17   |       |       |       |       |       |       |
| Q9EPK2 | <i>Rp2</i>      | Protein XRP2      | High   | 8  | 4  | 5   | 4  | 347  | 39.4  | 5.24  | 84   | 103   | 104.8 | 102.1 | 94.2  | 93.2  | 102.8 |
| P15920 | <i>Atp6v0a2</i> | V-type proton     | High   | 5  | 4  | 6   | 2  | 856  | 98.1  | 6.64  | 79   | 86.4  | 99.8  | 101.1 | 87.9  | 73.6  | 151.2 |
| Q9QYM9 | <i>Tmeff2</i>   | Tomoregulin-2     | Medium | 3  | 1  | 1   | 1  | 374  | 41.4  | 5.15  | 17   | 74.1  | 93.8  | 120.9 | 103.4 | 105.3 | 102.5 |
| P14106 | <i>C1qb</i>     | Complement        | High   | 17 | 4  | 4   | 4  | 253  | 26.7  | 8.15  | 61   | 131.5 | 123.9 | 138.4 | 67.2  | 68.9  | 70.1  |
| Q9D024 | <i>Ccdc47</i>   | Coiled-coil       | High   | 17 | 6  | 6   | 6  | 483  | 55.8  | 4.84  | 62   | 103.5 | 105.5 | 103.6 | 96.3  | 96.7  | 94.3  |
| P70318 | <i>Tial1</i>    | Nucleolysin       | High   | 14 | 5  | 6   | 5  | 392  | 43.4  | 7.99  | 175  | 101.7 | 98.1  | 102   | 97.1  | 101.4 | 99.7  |
| Q99JY3 | <i>Gimap4</i>   | GTPase IMAP       | High   | 7  | 1  | 1   | 1  | 328  | 38    | 6.23  | 30   | 98.8  | 105.2 | 88    | 96.4  | 108.1 | 103.5 |
| O35678 | <i>Mgll</i>     | Monoglyceride     | High   | 39 | 10 | 17  | 10 | 303  | 33.4  | 7.15  | 248  | 97    | 104.6 | 99.4  | 101.7 | 95.8  | 101.5 |
| O35098 | <i>Dpysl4</i>   | Dihydropyrimidin  | High   | 44 | 18 | 50  | 17 | 572  | 61.9  | 6.98  | 974  | 91.8  | 92.9  | 89.7  | 106.6 | 108.5 | 110.6 |
| Q61609 | <i>Slc20a1</i>  | Sodium-           | High   | 1  | 1  | 1   | 1  | 681  | 74.1  | 6.89  | 25   | 100.4 | 104   | 103.9 | 102.1 | 97    | 92.6  |
| P54227 | <i>Stmn1</i>    | Stathmin          | High   | 67 | 12 | 27  | 9  | 149  | 17.3  | 5.97  | 442  | 100.4 | 99.3  | 91.3  | 100.6 | 105.5 | 103   |
| Q8C729 | <i>Fam126b</i>  | Protein           | High   | 20 | 11 | 12  | 11 | 530  | 58.6  | 7.72  | 206  | 102.6 | 102.6 | 93.4  | 101.7 | 101   | 98.7  |
| Q9CYL5 | <i>Glpr2</i>    | Golgi-associated  | High   | 25 | 3  | 3   | 3  | 154  | 17.1  | 9.51  | 46   | 107   | 107.9 | 127.1 | 82.7  | 79.6  | 95.7  |
| Q8C525 | <i>Mb21d2</i>   | Protein MB21D2    | High   | 6  | 2  | 2   | 2  | 428  | 48.4  | 7.68  | 34   |       |       |       |       |       |       |
| Q8BNN1 | <i>Spata2l</i>  | Spermatogenesi    | High   | 11 | 4  | 4   | 4  | 426  | 46.7  | 5.2   | 37   | 102.2 | 102.3 | 93.7  | 101.1 | 96.7  | 103.9 |
| P83510 | <i>Tnik</i>     | Traf2 and NCK-    | High   | 10 | 12 | 14  | 6  | 1323 | 150.3 | 7.27  | 120  | 87.9  | 98.5  | 85.5  | 96.3  | 118.1 | 113.5 |
| Q6PIE5 | <i>Atp1a2</i>   | Sodium/potassiu   | High   | 53 | 50 | 300 | 29 | 1020 | 112.1 | 5.55  | 7750 | 100.1 | 101.5 | 96    | 101.4 | 100.8 | 100.2 |
| Q9ESN6 | <i>Trim2</i>    | Tripartite motif- | High   | 23 | 12 | 18  | 12 | 744  | 81.4  | 6.96  | 487  | 96.7  | 101.2 | 101.1 | 98.1  | 101.5 | 101.4 |
| Q91WE2 | <i>Psme3ip1</i> | PSME3-            | High   | 16 | 4  | 4   | 4  | 254  | 28.7  | 5.14  | 24   | 96.1  | 93.6  | 101.6 | 91.6  | 96.6  | 120.6 |
| Q8K0U4 | <i>Hspa12a</i>  | Heat shock 70     | High   | 40 | 24 | 59  | 22 | 675  | 74.8  | 6.77  | 1352 | 94    | 100.9 | 90    | 106.2 | 105.1 | 103.7 |
| Q922S4 | <i>Pde2a</i>    | cGMP-             | High   | 32 | 24 | 43  | 24 | 939  | 105.6 | 5.41  | 909  | 97    | 95.9  | 99.4  | 100.7 | 103.7 | 103.3 |
| O35710 | <i>Noct</i>     | Nocturnin         | Medium | 4  | 1  | 1   | 1  | 429  | 48.3  | 7.27  | 16   |       |       |       |       |       |       |
| Q9DC53 | <i>Cpne8</i>    | Copine-8          | High   | 16 | 8  | 12  | 2  | 577  | 64.6  | 5.97  | 157  | 97.6  | 97.9  | 99.6  | 90    | 116.1 | 98.8  |
| Q8K2P6 | <i>Rfesd</i>    | Rieske domain-    | Medium | 5  | 1  | 1   | 1  | 157  | 18    | 6.86  | 13   |       |       |       |       |       |       |
| Q8BGD5 | <i>Cpt1c</i>    | Carnitine O-      | High   | 12 | 7  | 8   | 7  | 798  | 90    | 7.49  | 93   | 94.2  | 101.4 | 94.9  | 105.2 | 99.7  | 104.5 |
| Q9Z140 | <i>Cpne6</i>    | Copine-6          | High   | 36 | 17 | 29  | 16 | 557  | 61.7  | 5.59  | 470  | 97.3  | 86.9  | 119.7 | 94.8  | 100   | 101.4 |
| Q3V3R1 | <i>Mthfd1l</i>  | Monofunctional    | High   | 16 | 14 | 16  | 14 | 977  | 105.7 | 7.02  | 314  | 96.4  | 98.2  | 89.3  | 107.9 | 99.9  | 108.1 |
| Q9CZ44 | <i>Nsfl1c</i>   | NSFL1 cofactor    | High   | 50 | 14 | 24  | 14 | 370  | 40.7  | 5.15  | 359  | 97.9  | 97.1  | 96.3  | 100.4 | 104.7 | 103.5 |
| Q99PL5 | <i>Rrbp1</i>    | Ribosome-         | High   | 8  | 12 | 15  | 12 | 1605 | 172.8 | 9.33  | 250  | 115.6 | 109.7 | 135.5 | 78.4  | 81.6  | 79.2  |
| Q62245 | <i>Sos1</i>     | Son of            | High   | 3  | 3  | 3   | 3  | 1319 | 150.8 | 6.89  | 66   | 98.9  | 101.3 | 87.7  | 106.5 | 102.4 | 103.2 |
| Q9JIK9 | <i>Mrps34</i>   | 28S ribosomal     | Medium | 3  | 1  | 1   | 1  | 218  | 25.8  | 10.43 | 21   |       |       |       |       |       |       |
| P48453 | <i>Ppp3cb</i>   | Serine/threonine  | High   | 38 | 17 | 45  | 10 | 525  | 59.1  | 5.91  | 785  | 95    | 96.9  | 98.1  | 101.9 | 103.5 | 104.6 |
| O88967 | <i>Yme1l1</i>   | ATP-dependent     | High   | 12 | 6  | 8   | 6  | 715  | 80    | 8.97  | 180  | 100.2 | 101.5 | 103   | 96.1  | 99.1  | 100   |
| Q8CFE3 | <i>Rcor1</i>    | REST              | High   | 2  | 1  | 1   | 1  | 480  | 52.7  | 7.03  | 33   | 105.4 | 101.3 | 104.5 | 98.7  | 98.9  | 91.2  |
| Q76MZ3 | <i>Ppp2r1a</i>  | Serine/threonine  | High   | 47 | 21 | 63  | 17 | 589  | 65.3  | 5.11  | 1172 | 97.8  | 99.6  | 94.6  | 102.4 | 103.7 | 102   |

|        |                   |                    |        |    |    |    |    |      |       |       |      |       |       |       |       |       |       |
|--------|-------------------|--------------------|--------|----|----|----|----|------|-------|-------|------|-------|-------|-------|-------|-------|-------|
| Q9JJ61 | <i>Galnt16</i>    | Polypeptide N-     | High   | 5  | 3  | 3  | 3  | 558  | 62.8  | 8.92  | 36   | 105.6 | 90.3  | 113.6 | 99.8  | 98.3  | 92.4  |
| Q9D4F8 | <i>Tubgcp4</i>    | Gamma-tubulin      | High   | 4  | 2  | 2  | 2  | 667  | 76.1  | 6.65  | 43   | 99.9  | 103.9 | 97.1  | 104.6 | 97.4  | 97.2  |
| P10810 | <i>Cd14</i>       | Monocyte           | High   | 10 | 2  | 2  | 2  | 366  | 39.2  | 5.21  | 45   | 103.9 | 89.6  | 111.1 | 98.9  | 97.3  | 99.1  |
| Q99KJ8 | <i>Dctn2</i>      | Dynactin subunit   | High   | 60 | 20 | 37 | 20 | 402  | 44.1  | 5.26  | 840  | 97.1  | 100.3 | 93.5  | 101.8 | 104   | 103.3 |
| Q6NVG1 | <i>Lpcat4</i>     | Lysophospholipi    | High   | 8  | 4  | 5  | 4  | 524  | 57.1  | 8.75  | 66   | 95.3  | 103.8 | 79.7  | 106.1 | 110.2 | 104.8 |
| Q91WE1 | <i>Snx15</i>      | Sorting nexin-15   | High   | 13 | 4  | 4  | 4  | 337  | 37.7  | 5.24  | 26   | 95    | 95.3  | 100.6 | 96    | 106.6 | 106.5 |
| Q80YF9 | <i>Arhgap33</i>   | Rho GTPase-        | High   | 3  | 3  | 3  | 3  | 1305 | 139.7 | 9.19  | 33   | 88.3  | 94.4  | 103.7 | 92.9  | 107.9 | 112.8 |
| Q3U3E2 | <i>Fam117b</i>    | Protein            | High   | 4  | 2  | 2  | 2  | 584  | 61.3  | 9.95  | 35   | 94.6  | 97.9  | 93.3  | 102.7 | 103.5 | 108   |
| Q9EPK7 | <i>Xpo7</i>       | Exportin-7         | High   | 22 | 19 | 25 | 19 | 1087 | 123.7 | 6.38  | 439  | 98.2  | 101.9 | 96.3  | 101.6 | 100.2 | 101.8 |
| Q8CCT4 | <i>Tceal5</i>     | Transcription      | High   | 35 | 7  | 14 | 7  | 200  | 22    | 6.2   | 178  | 90.1  | 92.8  | 111.3 | 96.8  | 102.5 | 106.5 |
| Q3UEB3 | <i>Puf60</i>      | Poly(U)-binding-   | High   | 34 | 14 | 18 | 14 | 564  | 60.2  | 5.29  | 309  | 98.4  | 99.6  | 100.2 | 97.5  | 103.5 | 100.8 |
| Q8BLJ3 | <i>Plcxd3</i>     | PI-PLC X           | High   | 23 | 5  | 5  | 5  | 321  | 36.3  | 6.62  | 125  | 95.7  | 87.6  | 90.4  | 107.4 | 111.9 | 106.9 |
| P30355 | <i>Alox5ap</i>    | Arachidonate 5-    | High   | 8  | 1  | 1  | 1  | 161  | 18.1  | 8.47  | 27   | 100.3 | 87.2  | 112.8 | 94.8  | 95.8  | 109.1 |
| Q9QXM1 | <i>Jmy</i>        | Junction-          | High   | 4  | 3  | 4  | 3  | 983  | 110.5 | 6.13  | 42   | 92.2  | 96.6  | 89.6  | 100.6 | 108.9 | 112.2 |
| P70345 | <i>Bcl2l2</i>     | Bcl-2-like protein | High   | 19 | 3  | 3  | 3  | 193  | 20.8  | 5.58  | 56   | 97    | 98.2  | 83.2  | 105.6 | 111.7 | 104.4 |
| Q9Z0X1 | <i>Aifm1</i>      | Apoptosis-         | High   | 29 | 15 | 21 | 15 | 612  | 66.7  | 9.17  | 354  | 95.9  | 102.3 | 95.8  | 103.1 | 100.8 | 102   |
| Q9JIX0 | <i>Eny2</i>       | Transcription      | High   | 17 | 1  | 2  | 1  | 101  | 11.5  | 9.33  | 18   | 102.9 | 101   | 99.1  | 100.6 | 101.6 | 94.8  |
| Q91VW5 | <i>Golga4</i>     | Golgin subfamily   | High   | 1  | 1  | 1  | 1  | 2238 | 257.4 | 5.36  | 17   | 94.6  | 98.2  | 102   | 89.3  | 102.8 | 113.1 |
| Q62141 | <i>Sin3b</i>      | Paired             | High   | 3  | 2  | 2  | 2  | 1098 | 126.3 | 7.06  | 38   | 95.7  | 103.3 | 91.2  | 94.9  | 102.9 | 111.9 |
| Q8C0P5 | <i>Coro2a</i>     | Coronin-2A         | High   | 20 | 10 | 12 | 10 | 524  | 59.5  | 7.71  | 244  | 100.4 | 100.4 | 99.2  | 103   | 99.9  | 97.2  |
| P35922 | <i>Fmr1</i>       | Synaptic           | High   | 12 | 7  | 7  | 6  | 614  | 68.9  | 7.62  | 107  | 96.4  | 100.4 | 93    | 109.5 | 102.3 | 98.5  |
| Q80W14 | <i>Prpf40b</i>    | Pre-mRNA-          | Medium | 1  | 1  | 1  | 1  | 870  | 99.2  | 6.96  | 16   | 80.3  | 103.5 | 92.1  | 118.2 | 90.9  | 115   |
| Q60676 | <i>Ppp5c</i>      | Serine/threonine   | High   | 28 | 12 | 19 | 12 | 499  | 56.8  | 6.2   | 374  | 95.7  | 101   | 88.6  | 107.6 | 104.5 | 102.5 |
| P43406 | <i>Itgav</i>      | Integrin alpha-V   | High   | 14 | 12 | 14 | 12 | 1044 | 115.3 | 5.63  | 323  | 106.3 | 100   | 111.3 | 96.3  | 92.9  | 93.2  |
| Q3UH93 | <i>Plxnd1</i>     | Plexin-D1          | High   | 11 | 15 | 17 | 15 | 1925 | 211.5 | 7.11  | 148  | 97.8  | 96.5  | 87.9  | 101.5 | 108.5 | 107.8 |
| Q921Q3 | <i>Alg1</i>       | Chitobiosyldipho   | Medium | 2  | 1  | 1  | 1  | 482  | 54.4  | 8.37  | 17   | 88    | 100   | 103.4 | 102.1 | 98.9  | 107.5 |
| P53564 | <i>Cux1</i>       | Homeobox           | High   | 1  | 2  | 2  | 2  | 1515 | 165.5 | 6.32  | 25   | 103.1 | 105.4 | 86.3  | 104.5 | 100.1 | 100.6 |
| Q6A026 | <i>Pds5a</i>      | Sister chromatid   | High   | 2  | 3  | 3  | 2  | 1332 | 150.2 | 7.85  | 54   | 77    | 91.2  | 85.9  | 82.2  | 80.7  | 183   |
| Q640N1 | <i>Aebp1</i>      | Adipocyte          | Low    | 1  | 1  | 1  | 1  | 1128 | 128.3 | 5.08  | 0    | 96.2  | 103.5 | 90.5  | 102.3 | 116.1 | 91.4  |
| Q9WUL7 | <i>Arl3</i>       | ADP-ribosylation   | High   | 62 | 9  | 14 | 9  | 182  | 20.5  | 7.24  | 345  | 98.9  | 100   | 100   | 99.9  | 98.3  | 102.9 |
| O35454 | <i>Clcn6</i>      | Chloride           | High   | 3  | 2  | 2  | 2  | 870  | 96.9  | 7.02  | 19   | 105.6 | 93.6  | 91.4  | 100.4 | 96    | 113   |
| Q921F2 | <i>Tardbp</i>     | TAR DNA-           | High   | 18 | 6  | 10 | 6  | 414  | 44.5  | 6.7   | 186  | 102   | 98.3  | 102.3 | 99.4  | 101.8 | 96.2  |
| Q8R2Z5 | <i>Vwa1</i>       | von Willebrand     | High   | 10 | 3  | 4  | 3  | 415  | 44.7  | 6.54  | 84   | 103   | 99.5  | 110.8 | 92.6  | 100.7 | 93.4  |
| Q61207 | <i>Psap</i>       | Prosaposin         | High   | 27 | 15 | 26 | 15 | 557  | 61.4  | 5.19  | 462  | 113   | 101.8 | 143.9 | 84.7  | 78.5  | 78    |
| P50429 | <i>Arsb</i>       | Arylsulfatase B    | High   | 14 | 6  | 7  | 6  | 534  | 59.6  | 7.24  | 75   | 96.7  | 93.6  | 99.1  | 105   | 112.5 | 93.2  |
| Q8VDS4 | <i>Rprd1a</i>     | Regulation of      | High   | 13 | 4  | 6  | 4  | 312  | 35.7  | 7.58  | 93   | 96.3  | 95.8  | 90.8  | 100   | 103.3 | 113.9 |
| Q3TPE9 | <i>Ankmy2</i>     | Ankyrin repeat     | High   | 21 | 8  | 9  | 8  | 440  | 48.7  | 6.67  | 213  | 97.5  | 94.3  | 102.6 | 104   | 100.2 | 101.5 |
| P35564 | <i>Canx</i>       | Calnexin           | High   | 29 | 20 | 31 | 20 | 591  | 67.2  | 4.64  | 454  | 103.1 | 101.2 | 109.4 | 94.5  | 95    | 96.8  |
| P40124 | <i>Cap1</i>       | Adenylyl           | High   | 44 | 18 | 44 | 17 | 474  | 51.5  | 7.52  | 963  | 101.2 | 100.1 | 103.8 | 97.1  | 99.9  | 97.9  |
| Q91ZD4 | <i>Vangl2</i>     | Vang-like protein  | High   | 2  | 1  | 1  | 1  | 521  | 59.7  | 9.22  | 44   | 88.8  | 95.6  | 87.4  | 106.8 | 104.5 | 116.9 |
| Q9CQA9 | <i>Ntpcr</i>      | Cancer-related     | Low    | 5  | 1  | 1  | 1  | 190  | 20.7  | 9.72  | 0    |       |       |       |       |       |       |
| Q91ZX7 | <i>Lrp1</i>       | Prolow-density     | High   | 12 | 48 | 63 | 48 | 4545 | 504.4 | 5.36  | 1007 | 102.1 | 98.3  | 104.5 | 99.1  | 97.4  | 98.6  |
| Q9WUQ2 | <i>Preb</i>       | Prolactin          | High   | 20 | 6  | 7  | 6  | 417  | 45.4  | 8.76  | 155  | 101.7 | 99.3  | 104.1 | 99.2  | 96.8  | 99    |
| Q8C5H8 | <i>Nadk2</i>      | NAD kinase 2,      | High   | 27 | 9  | 13 | 9  | 452  | 50.8  | 8.07  | 277  | 90.7  | 96.6  | 96.4  | 98.6  | 98.8  | 118.9 |
| Q8VHC3 | <i>Selenom</i>    | Selenoprotein M    | High   | 10 | 1  | 2  | 1  | 145  | 16.4  | 5.54  | 59   | 97.8  | 99.1  | 98.4  | 97.8  | 103.2 | 103.6 |
| Q6P8I4 | <i>Pcnp</i>       | PEST proteolytic   | High   | 25 | 4  | 4  | 4  | 178  | 19    | 7.49  | 48   | 101.1 | 98.6  | 101   | 102   | 100.2 | 97.1  |
| P07356 | <i>Anxa2</i>      | Annexin A2         | High   | 40 | 13 | 19 | 13 | 339  | 38.7  | 7.69  | 371  | 114.3 | 109   | 139.7 | 75.5  | 78.9  | 82.6  |
| P16014 | <i>Chgb</i>       | Secretogranin-1    | High   | 9  | 4  | 6  | 4  | 677  | 77.9  | 5.07  | 31   | 93    | 99.9  | 107.8 | 101.6 | 101.6 | 96.2  |
| P01633 | <i>Igk-V19-17</i> | Ig kappa chain     | High   | 6  | 1  | 1  | 1  | 149  | 16.4  | 6.92  | 32   | 183.8 | 57.1  | 280.7 | 24.8  | 26.3  | 27.4  |
| Q8CI59 | <i>Steap3</i>     | Metalloreductase   | High   | 3  | 2  | 2  | 2  | 488  | 54.7  | 9.22  | 29   |       |       |       |       |       |       |
| Q60520 | <i>Sin3a</i>      | Paired             | High   | 2  | 2  | 3  | 2  | 1274 | 145   | 7.25  | 78   | 92.3  | 97.9  | 95.2  | 100.8 | 98.4  | 115.4 |
| P61372 | <i>Isl1</i>       | Insulin gene       | Low    | 3  | 1  | 1  | 1  | 349  | 39    | 8.28  | 0    | 107   | 120.9 | 100.3 | 97.8  | 83.3  | 90.6  |
| Q7M6Z0 | <i>Rtn4rl2</i>    | Reticulon-4        | High   | 9  | 4  | 4  | 4  | 420  | 46    | 7.65  | 50   | 96.3  | 98.7  | 95    | 103.9 | 102.4 | 103.7 |
| Q8C163 | <i>Exog</i>       | Nuclease EXOG,     | High   | 26 | 7  | 7  | 7  | 368  | 41.4  | 8.12  | 109  | 94.4  | 102.8 | 96.3  | 99.7  | 102.5 | 104.3 |
| P40630 | <i>Tfam</i>       | Transcription      | High   | 30 | 8  | 9  | 8  | 243  | 28    | 9.69  | 106  | 104.8 | 108.3 | 96.1  | 96.7  | 97.4  | 96.8  |
| E9Q555 | <i>Rnf213</i>     | E3 ubiquitin-      | Medium | 0  | 2  | 2  | 2  | 5152 | 584.4 | 6.8   | 0    |       |       |       |       |       |       |
| P53996 | <i>Cnbp</i>       | Cellular nucleic   | High   | 46 | 8  | 10 | 8  | 178  | 19.6  | 7.58  | 98   | 99.5  | 96.7  | 100.1 | 105   | 92.1  | 106.6 |
| Q69ZX8 | <i>Ablim3</i>     | Actin-binding      | High   | 4  | 3  | 8  | 2  | 682  | 77.6  | 8.54  | 112  | 97    | 101.4 | 89.8  | 106.1 | 102.5 | 103.2 |
| Q08460 | <i>Kcnma1</i>     | Calcium-           | High   | 14 | 13 | 19 | 13 | 1209 | 134.3 | 7.15  | 288  | 95.7  | 98.2  | 89.3  | 108.2 | 106   | 102.5 |
| Q80Y56 | <i>Rbsn</i>       | Rabenosyn-5        | High   | 7  | 4  | 4  | 4  | 783  | 88.4  | 5.3   | 40   | 92.2  | 95.2  | 95.7  | 100.9 | 103.6 | 112.5 |
| Q8CEC0 | <i>Nup88</i>      | Nuclear pore       | High   | 5  | 2  | 2  | 2  | 753  | 84.9  | 6.27  | 34   | 102.7 | 105.1 | 82.2  | 102.5 | 99.7  | 107.8 |
| Q8CGP7 | <i>H2ac15</i>     | Histone H2A        | High   | 38 | 5  | 19 | 1  | 130  | 14.1  | 11.05 | 277  | 116.1 | 95.9  | 140.3 | 89.5  | 78.1  | 80.1  |
| Q923K4 | <i>Gtpbp3</i>     | tRNA               | High   | 5  | 1  | 1  | 1  | 492  | 52.1  | 6.05  | 24   | 51.6  | 150.8 | 109.1 | 70.8  | 103.1 | 114.6 |
| Q3UM45 | <i>Ppp1r7</i>     | Protein            | High   | 64 | 18 | 30 | 18 | 361  | 41.3  | 4.92  | 580  | 94.6  | 98.5  | 90.5  | 106.5 | 105.9 | 104   |
| Q99JH7 | <i>Clstn3</i>     | Calsyntenin-3      | High   | 5  | 4  | 5  | 4  | 956  | 105.8 | 5.34  | 89   | 93.2  | 95.2  | 98.5  | 116.5 | 93.6  | 102.9 |
| Q7TNM2 | <i>Trim46</i>     | Tripartite motif-  | High   | 16 | 8  | 10 | 8  | 759  | 83.4  | 7.65  | 227  | 91    | 96.6  | 96.2  | 108.9 | 98    | 109.3 |
| Q8R404 | <i>Micos13</i>    | MICOS complex      | High   | 41 | 3  | 6  | 3  | 119  | 13.4  | 8.63  | 71   | 99.7  | 106.1 | 95.3  | 100.2 | 104.2 | 94.4  |
| Q8VCH8 | <i>Ubxn4</i>      | UBX domain-        | High   | 8  | 3  | 4  | 3  | 506  | 56.4  | 6.61  | 66   | 116.5 | 102   | 104   | 83.6  | 97.2  | 96.7  |

|        |                |                    |        |    |    |     |    |      |       |       |      |       |       |       |       |       |       |
|--------|----------------|--------------------|--------|----|----|-----|----|------|-------|-------|------|-------|-------|-------|-------|-------|-------|
| P17427 | <i>Ap2a2</i>   | AP-2 complex       | High   | 41 | 35 | 83  | 20 | 938  | 104   | 6.93  | 1559 | 98.8  | 96.1  | 99.5  | 100.6 | 102.6 | 102.4 |
| Q64339 | <i>Isg15</i>   | Ubiquitin-like     | High   | 17 | 2  | 2   | 2  | 161  | 17.9  | 7.9   | 20   | 122   | 135.4 | 137.6 | 70.3  | 68.1  | 66.5  |
| Q6QI06 | <i>Rictor</i>  | Rapamycin-         | High   | 2  | 2  | 2   | 2  | 1708 | 191.4 | 7.23  | 23   | 106   | 84.7  | 94.6  | 93.9  | 101.2 | 119.6 |
| Q9ERA0 | <i>Tfcp2</i>   | Alpha-globin       | High   | 2  | 1  | 1   | 1  | 502  | 57    | 5.54  | 53   | 95    | 99.9  | 110.1 | 99.3  | 90.9  | 104.9 |
| Q791T5 | <i>Mtch1</i>   | Mitochondrial      | High   | 19 | 7  | 8   | 7  | 389  | 41.5  | 9.32  | 106  | 93.1  | 98.2  | 93    | 103.8 | 103.9 | 108   |
| Q61292 | <i>Lamb2</i>   | Laminin subunit    | High   | 11 | 18 | 20  | 18 | 1799 | 196.5 | 6.67  | 260  | 99.2  | 106.1 | 98.9  | 96.3  | 98.3  | 101.2 |
| Q9R1Q8 | <i>Tagln3</i>  | Transgelin-3       | High   | 74 | 13 | 42  | 11 | 199  | 22.5  | 7.33  | 867  | 98.5  | 97.7  | 91    | 109   | 98.6  | 105.3 |
| Q2KN98 | <i>Specc1l</i> | Cytospin-A         | Medium | 1  | 1  | 1   | 1  | 1118 | 124.4 | 5.76  | 0    | 91.7  | 100.8 | 83.9  | 112.2 | 108   | 103.3 |
| A6H630 | <i>Armt1</i>   | Damage-control     | High   | 11 | 5  | 5   | 5  | 439  | 50.5  | 5.92  | 90   | 97.7  | 110   | 89.4  | 102.8 | 99.6  | 100.4 |
| Q9D6U8 | <i>Fam162a</i> | Protein            | High   | 24 | 3  | 8   | 3  | 155  | 17.7  | 9.88  | 176  | 98    | 104.1 | 97.8  | 100.7 | 97.7  | 101.8 |
| A6X919 | <i>Dpy19l1</i> | Probable C-        | High   | 3  | 2  | 2   | 2  | 746  | 84.1  | 9.16  | 34   | 104.7 | 107.1 | 95.6  | 99    | 94.4  | 99.2  |
| P48771 | <i>Cox7a2</i>  | Cytochrome c       | High   | 28 | 2  | 6   | 2  | 83   | 9.3   | 10.27 | 126  | 92.4  | 102.3 | 92.9  | 105.9 | 105.6 | 100.8 |
| Q04447 | <i>Ckb</i>     | Creatine kinase    | High   | 62 | 19 | 251 | 18 | 381  | 42.7  | 5.67  | 6086 | 96.9  | 104.8 | 92.9  | 102   | 101   | 102.4 |
| Q8CIB5 | <i>Fermt2</i>  | Fermitin family    | High   | 18 | 10 | 13  | 10 | 680  | 77.8  | 6.7   | 271  | 98.5  | 100.4 | 98.2  | 98.9  | 103.9 | 100.1 |
| Q8CI75 | <i>Dis3l2</i>  | DIS3-like          | High   | 6  | 5  | 5   | 5  | 870  | 97.7  | 5.9   | 67   | 95.9  | 102.5 | 92.3  | 104.1 | 102.3 | 102.9 |
| Q8C3W1 |                | Uncharacterized    | High   | 18 | 4  | 4   | 4  | 322  | 35.3  | 5.24  | 69   | 92.8  | 90.7  | 95.4  | 100.4 | 113.6 | 107.1 |
| P01887 | <i>B2m</i>     | Beta-2-            | High   | 15 | 2  | 2   | 2  | 119  | 13.8  | 8.44  | 46   | 133.1 | 111   | 184   | 61.7  | 54    | 56.2  |
| Q80WC7 | <i>Agfg2</i>   | Arf-GAP domain     | High   | 13 | 4  | 5   | 4  | 479  | 48.9  | 9.1   | 94   | 91.1  | 101.8 | 95.8  | 107.5 | 105   | 98.9  |
| Q8C0E2 | <i>Vps26b</i>  | Vacuolar protein   | High   | 29 | 7  | 12  | 7  | 336  | 39.1  | 7.37  | 187  | 99    | 98.5  | 93.2  | 101.7 | 105.2 | 102.4 |
| Q8BX94 | <i>Osbpl2</i>  | Oxysterol-         | High   | 12 | 5  | 5   | 4  | 484  | 55.3  | 6.2   | 79   | 93.5  | 100   | 97.8  | 100.6 | 108.1 | 100   |
| Q921W4 | <i>Cryzl1</i>  | Quinone            | High   | 21 | 5  | 5   | 5  | 348  | 38.7  | 5.97  | 147  | 100.3 | 97.1  | 101.3 | 102   | 101.9 | 97.3  |
| P80317 | <i>Cct6a</i>   | T-complex          | High   | 47 | 19 | 45  | 15 | 531  | 58    | 7.08  | 928  | 99.4  | 105.9 | 108.6 | 94.4  | 96    | 95.6  |
| Q3TLH4 | <i>Prrc2c</i>  | Protein PRRC2C     | High   | 3  | 8  | 10  | 7  | 2846 | 310.7 | 9.1   | 105  | 98.5  | 92.8  | 98.4  | 100.4 | 100.5 | 109.5 |
| Q9ES64 | <i>Ush1c</i>   | Harmonin           | Low    | 2  | 1  | 1   | 1  | 910  | 102.2 | 7.09  | 0    | 86.7  | 139.5 | 93.6  | 98.9  | 80.5  | 100.8 |
| Q8CAK1 | <i>Iba57</i>   | Putative           | High   | 11 | 2  | 2   | 2  | 358  | 38.4  | 9.01  | 44   | 110.4 | 100.8 | 97.3  | 93.5  | 105.8 | 92.2  |
| Q9CQ33 | <i>Lztr1</i>   | Leucine-zipper-    | Medium | 2  | 1  | 1   | 1  | 837  | 94.4  | 6.47  | 0    | 90.1  | 104.3 | 100   | 112.7 | 100.2 | 92.8  |
| Q6R5N8 | <i>Tlr13</i>   | Toll-like receptor | Medium | 1  | 1  | 3   | 1  | 991  | 114.4 | 8.63  | 34   | 97.9  | 105.4 | 83.3  | 110.2 | 105.5 | 97.8  |
| O08582 | <i>Gtpbp1</i>  | GTP-binding        | High   | 9  | 5  | 7   | 5  | 668  | 72.3  | 8.29  | 158  | 102   | 97    | 105.4 | 100   | 98.5  | 97.1  |
| Q8VDZ4 | <i>Zdhhc5</i>  | Palmitoyltransfer  | High   | 8  | 4  | 6   | 4  | 715  | 77.5  | 9.01  | 105  | 94.1  | 105.1 | 87.1  | 102.8 | 105.7 | 105.3 |
| P17183 | <i>Eno2</i>    | Gamma-enolase      | High   | 68 | 21 | 171 | 16 | 434  | 47.3  | 5.11  | 4256 | 96.8  | 103.3 | 92.4  | 103   | 102.7 | 101.9 |
| Q61137 | <i>Astn1</i>   | Astrotactin-1      | High   | 17 | 13 | 19  | 13 | 1302 | 144.8 | 5.21  | 397  | 95    | 99.1  | 89    | 107.3 | 104.2 | 105.5 |
| Q63810 | <i>Ppp3r1</i>  | Calcineurin        | High   | 74 | 12 | 45  | 12 | 170  | 19.3  | 4.81  | 1099 | 95.3  | 102.5 | 90.8  | 105.1 | 106   | 100.3 |
| Q9R1C7 | <i>Prpf40a</i> | Pre-mRNA-          | High   | 4  | 4  | 4   | 4  | 953  | 108.4 | 7.69  | 48   | 94.9  | 104.3 | 105   | 97.3  | 95.5  | 103   |
| Q60692 | <i>Psmb6</i>   | Proteasome         | High   | 27 | 6  | 11  | 6  | 238  | 25.4  | 5.11  | 218  | 95.3  | 95.3  | 94.2  | 103.2 | 108.2 | 103.8 |
| P62141 | <i>Ppp1cb</i>  | Serine/threonine   | High   | 48 | 14 | 33  | 4  | 327  | 37.2  | 6.19  | 612  | 99.2  | 108.5 | 110   | 94.4  | 94.5  | 93.3  |
| Q3UMU9 | <i>Hdgfl2</i>  | Hepatoma-          | High   | 7  | 4  | 4   | 3  | 669  | 74.2  | 8.66  | 97   | 100.9 | 100.1 | 94.3  | 104.1 | 97.4  | 103.2 |
| Q9CVD2 | <i>Atxn3</i>   | Ataxin-3           | High   | 3  | 1  | 1   | 1  | 355  | 40.5  | 4.83  | 21   | 114.8 | 96.7  | 107.9 | 89.9  | 93.7  | 97    |
| P60670 | <i>Nploc4</i>  | Nuclear protein    | High   | 21 | 10 | 10  | 10 | 608  | 68    | 6.46  | 140  | 100.4 | 102.2 | 101.9 | 100.9 | 99.6  | 95    |
| P18826 | <i>Phka1</i>   | Phosphorylase b    | High   | 7  | 8  | 10  | 8  | 1241 | 138.7 | 5.86  | 148  | 101.1 | 100.1 | 102.6 | 94.1  | 100.9 | 101.2 |
| Q9D4H8 | <i>Cul2</i>    | Cullin-2 OS=Mus    | High   | 20 | 15 | 18  | 15 | 745  | 86.8  | 7.01  | 212  | 98.6  | 100.6 | 95.7  | 99.9  | 103.7 | 101.4 |
| P38647 | <i>Hspa9</i>   | Stress-70          | High   | 51 | 31 | 71  | 30 | 679  | 73.4  | 6.07  | 1241 | 99.5  | 106.4 | 97.8  | 99.2  | 100.3 | 96.8  |
| Q60751 | <i>Igf1r</i>   | Insulin-like       | High   | 2  | 2  | 3   | 2  | 1373 | 155.7 | 5.74  | 63   | 93.4  | 96    | 93.8  | 112   | 97    | 107.9 |
| Q64322 | <i>Npdc1</i>   | Neural             | Medium | 5  | 1  | 1   | 1  | 332  | 35.7  | 7.12  | 18   | 113   | 103.2 | 113.1 | 110.3 | 71.3  | 89.2  |
| Q8BG05 | <i>Hnrnpa3</i> | Heterogeneous      | High   | 37 | 16 | 31  | 13 | 379  | 39.6  | 9.01  | 443  | 98.5  | 96.1  | 97.6  | 100.6 | 106.5 | 100.7 |
| Q570Y9 | <i>Deptor</i>  | DEP domain-        | High   | 2  | 1  | 1   | 1  | 409  | 46.1  | 7.91  | 30   | 94.8  | 109.9 | 99.3  | 110.9 | 83.1  | 102   |
| E9Q137 | <i>Tex264</i>  | Testis-expressed   | Medium | 3  | 1  | 1   | 1  | 309  | 33.6  | 5.4   | 0    | 87.6  | 103.9 | 114.5 | 90.7  | 103.7 | 99.6  |
| Q8K1J6 | <i>Trmt1</i>   | CCA tRNA           | High   | 25 | 9  | 11  | 9  | 434  | 49.9  | 8.56  | 124  | 99    | 99.9  | 95.5  | 100.1 | 102.7 | 102.8 |
| Q9Z2D6 | <i>Mecp2</i>   | Methyl-CpG-        | High   | 35 | 15 | 21  | 15 | 484  | 52.3  | 9.96  | 286  | 97.6  | 94    | 101.4 | 101.6 | 104.4 | 101   |
| Q8BGQ1 | <i>Vipas39</i> | Spermatogenesi     | High   | 6  | 2  | 2   | 2  | 491  | 56.6  | 7.17  | 34   | 73.6  | 104.5 | 82.7  | 132.2 | 96    | 111   |
| Q8VI47 | <i>Abcc2</i>   | Canalicular        | Medium | 1  | 1  | 1   | 1  | 1543 | 173.6 | 8.65  | 19   | 88.7  | 102.9 | 82.7  | 106.5 | 107.2 | 112.1 |
| Q3U4G3 | <i>Xylyt1</i>  | Xyloside           | Low    | 2  | 1  | 1   | 1  | 392  | 43.8  | 7.78  | 0    | 101.7 | 111.2 | 79.5  | 108.7 | 100.3 | 98.5  |
| Q8VE47 | <i>Uba5</i>    | Ubiquitin-like     | High   | 24 | 7  | 9   | 7  | 403  | 44.8  | 4.96  | 181  | 94.7  | 97.1  | 102.2 | 100   | 100.8 | 105.2 |
| Q9D8X1 | <i>Cutc</i>    | Copper             | High   | 11 | 2  | 3   | 2  | 272  | 29    | 7.34  | 99   | 92.9  | 96.8  | 98.5  | 103.3 | 105.7 | 102.8 |
| Q6PD03 | <i>Ppp2r5a</i> | Serine/threonine   | High   | 19 | 8  | 10  | 7  | 486  | 56.3  | 7.03  | 186  | 99.3  | 101.6 | 95.9  | 106   | 100.6 | 96.6  |
| P70689 | <i>Gjb6</i>    | Gap junction       | High   | 8  | 1  | 1   | 1  | 261  | 30.3  | 8.38  | 33   | 90.6  | 113.9 | 104.7 | 99.1  | 96.6  | 95    |
| P21447 | <i>Abcb1a</i>  | ATP-dependent      | High   | 11 | 10 | 13  | 9  | 1276 | 140.6 | 8.85  | 198  | 97.1  | 98.6  | 94    | 102   | 98.2  | 110.1 |
| P05533 | <i>Ly6a</i>    | Lymphocyte         | High   | 16 | 1  | 1   | 1  | 134  | 14.4  | 4.83  | 36   | 102.9 | 102.7 | 143.7 | 92.4  | 71.7  | 86.6  |
| P31001 | <i>Des</i>     | Desmin OS=Mus      | High   | 22 | 10 | 17  | 5  | 469  | 53.5  | 5.27  | 211  | 110.2 | 105.5 | 112.1 | 82.6  | 94.1  | 95.6  |
| P55096 | <i>Abcd3</i>   | ATP-binding        | High   | 13 | 7  | 8   | 7  | 659  | 75.4  | 9.26  | 134  | 107.6 | 106.1 | 115.6 | 87.6  | 91.9  | 91.2  |
| Q71KT5 | <i>Tm7sf2</i>  | Delta(14)-sterol   | Low    | 5  | 1  | 1   | 1  | 418  | 46.5  | 8.28  | 0    | 94.5  | 97.7  | 93.9  | 102.5 | 107.2 | 104.1 |
| Q922K7 | <i>Nop2</i>    | Probable 28S       | High   | 3  | 2  | 2   | 2  | 793  | 86.7  | 9.22  | 37   | 111.5 | 88.1  | 124.9 | 92.5  | 91    | 92    |
| Q7TMY8 | <i>Huwe1</i>   | E3 ubiquitin-      | High   | 7  | 26 | 28  | 26 | 4377 | 482.3 | 5.22  | 451  | 97.5  | 98.7  | 99.4  | 99.4  | 101   | 104   |
| P62835 | <i>Rap1a</i>   | Ras-related        | High   | 48 | 7  | 14  | 3  | 184  | 21    | 6.67  | 324  | 95.4  | 106.3 | 96.4  | 100.2 | 99.4  | 102.2 |
| Q9D7E3 | <i>Ovca2</i>   | Esterase OVCA2     | Medium | 3  | 1  | 1   | 1  | 225  | 24.2  | 5.88  | 23   | 106.5 | 115.6 | 86.6  | 83.5  | 113.9 | 94    |
| Q8C079 | <i>Strip1</i>  | Striatin-          | High   | 13 | 8  | 11  | 6  | 837  | 95.5  | 6.25  | 169  | 91.4  | 91.7  | 91.1  | 101.7 | 107.7 | 116.5 |
| Q91W82 | <i>Ube2e2</i>  | Ubiquitin-         | Medium | 7  | 1  | 1   | 1  | 201  | 22.2  | 7.71  | 0    | 99.7  | 99.3  | 96.7  | 96    | 85.5  | 122.8 |
| Q9CZX7 | <i>Pip4p2</i>  | Type 2             | High   | 11 | 1  | 1   | 1  | 257  | 28    | 8.68  | 38   | 98.4  | 96.9  | 110.8 | 103.5 | 90.7  | 99.6  |
| Q9D0K0 | <i>Tbc1d7</i>  | TBC1 domain        | Medium | 2  | 1  | 1   | 1  | 293  | 33.8  | 7.2   | 16   | 85.3  | 99.4  | 99.3  | 106.6 | 95.7  | 113.8 |



|        |                 |                   |        |    |    |     |    |      |       |       |      |       |       |       |       |       |       |
|--------|-----------------|-------------------|--------|----|----|-----|----|------|-------|-------|------|-------|-------|-------|-------|-------|-------|
| Q8R1Y2 | <i>Bmerb1</i>   | bMERB domain-     | High   | 5  | 1  | 1   | 1  | 203  | 23.5  | 5.63  | 47   | 98.6  | 94    | 116.1 | 85.2  | 105.1 | 101   |
| O35841 | <i>Api5</i>     | Apoptosis         | High   | 33 | 13 | 18  | 13 | 504  | 56.8  | 5.92  | 309  | 103.8 | 97.1  | 111.3 | 96.1  | 94.4  | 97.4  |
| Q9Z0E0 | <i>Ncdn</i>     | Neurochondrin     | High   | 32 | 18 | 38  | 18 | 729  | 78.8  | 5.54  | 837  | 94.6  | 97.5  | 102.8 | 97    | 101   | 107.1 |
| P61021 | <i>Rab5b</i>    | Ras-related       | High   | 72 | 10 | 24  | 7  | 215  | 23.7  | 8.13  | 465  | 92.7  | 94.7  | 92.3  | 107   | 108.2 | 105.2 |
| Q8K2D3 | <i>Edc3</i>     | Enhancer of       | High   | 2  | 1  | 1   | 1  | 508  | 55.9  | 7.09  | 37   | 93.9  | 99.5  | 99.3  | 105.1 | 103.5 | 98.7  |
| Q9D8X2 | <i>Ccdc124</i>  | Coiled-coil       | High   | 22 | 5  | 5   | 5  | 217  | 25.3  | 9.64  | 75   | 97.4  | 97.6  | 95.4  | 102   | 99.6  | 108.1 |
| Q9JLZ6 | <i>Hic2</i>     | Hypermethylated   | High   | 2  | 1  | 1   | 1  | 619  | 66.7  | 6.35  | 41   | 109.9 | 106.3 | 99.9  | 94.8  | 91.2  | 97.9  |
| Q8CC12 | <i>Cdan1</i>    | Codanin-1         | High   | 1  | 1  | 1   | 1  | 1239 | 135.8 | 7.25  | 42   |       |       |       |       |       |       |
| Q9DB05 | <i>Napa</i>     | Alpha-soluble     | High   | 67 | 18 | 38  | 14 | 295  | 33.2  | 5.45  | 694  | 96.3  | 100.8 | 94.4  | 102.7 | 99.2  | 106.6 |
| O09012 | <i>Pex5</i>     | Peroxisomal       | High   | 13 | 5  | 5   | 5  | 639  | 70.7  | 4.55  | 48   | 98.2  | 93.2  | 101.5 | 103   | 98.4  | 105.7 |
| Q9DBT5 | <i>Ampd2</i>    | AMP deaminase     | High   | 13 | 10 | 12  | 10 | 798  | 92    | 6.23  | 115  | 101.5 | 97.7  | 106   | 99.2  | 97.1  | 98.6  |
| P16858 | <i>Gapdh</i>    | Glyceraldehyde-   | High   | 65 | 16 | 236 | 16 | 333  | 35.8  | 8.25  | 5428 | 96.6  | 99.7  | 93.9  | 99.4  | 107.2 | 103.2 |
| Q69Z99 | <i>Znf512</i>   | Zinc finger       | High   | 4  | 2  | 2   | 2  | 562  | 63.9  | 9.51  | 28   | 94.1  | 94.4  | 102.7 | 106.4 | 106.2 | 96.2  |
| Q8VHN8 | <i>Nudt16l1</i> | Tudor-interacting | High   | 12 | 2  | 2   | 2  | 211  | 23.4  | 9.26  | 18   | 90    | 106.4 | 97.7  | 100.2 | 107.9 | 97.8  |
| Q91YJ2 | <i>Snx4</i>     | Sorting nexin-4   | High   | 19 | 7  | 10  | 7  | 450  | 51.7  | 5.8   | 158  | 95.9  | 96.6  | 91.8  | 104   | 106.9 | 104.8 |
| Q9D0J4 | <i>Arl2</i>     | ADP-ribosylation  | High   | 48 | 6  | 7   | 6  | 184  | 20.9  | 5.96  | 167  | 96.8  | 97.9  | 97.2  | 99.9  | 104.3 | 103.8 |
| Q09M02 | <i>Agbl5</i>    | Cytosolic         | Low    | 1  | 1  | 1   | 1  | 886  | 97.5  | 9.07  | 0    | 99.2  | 55.6  | 103.6 | 120.1 | 110.2 | 111.4 |
| Q9QZX7 | <i>Srr</i>      | Serine racemase   | High   | 38 | 9  | 16  | 9  | 339  | 36.3  | 6.02  | 304  | 93.4  | 96.4  | 91.7  | 106.4 | 106.1 | 106   |
| Q91WG7 | <i>Dgkg</i>     | Diacylglycerol    | High   | 13 | 6  | 7   | 6  | 788  | 88.5  | 6.76  | 94   | 100.2 | 84.6  | 113.6 | 96.5  | 106   | 99.2  |
| Q9ER72 | <i>Cars1</i>    | Cysteine--tRNA    | High   | 20 | 14 | 15  | 14 | 831  | 94.8  | 6.76  | 158  | 100.3 | 99.6  | 94.3  | 102.8 | 99.2  | 103.9 |
| P21107 | <i>Tpm3</i>     | Tropomyosin       | High   | 43 | 15 | 31  | 8  | 285  | 33    | 4.72  | 537  | 98    | 101.1 | 99.9  | 99.4  | 98.8  | 102.8 |
| Q91WG5 | <i>Prkg2</i>    | 5'-AMP-activated  | High   | 7  | 4  | 5   | 3  | 566  | 62.9  | 9.36  | 134  | 100   | 99.5  | 106.4 | 97.3  | 99.5  | 97.4  |
| Q80UP8 | <i>Slc20a2</i>  | Sodium-           | High   | 3  | 3  | 3   | 3  | 656  | 70.8  | 6.48  | 33   | 100.5 | 106.7 | 96.7  | 97    | 101.3 | 97.8  |
| Q8C0K5 | <i>Slc25a16</i> | Graves disease    | High   | 11 | 3  | 3   | 3  | 332  | 36.2  | 9.88  | 55   | 97.3  | 93    | 100.1 | 99.3  | 106.7 | 103.6 |
| Q9JM96 | <i>Cdc42ep4</i> | Cdc42 effector    | High   | 21 | 6  | 9   | 6  | 349  | 37.8  | 5.36  | 184  | 104.1 | 100.6 | 105.5 | 96.9  | 97.2  | 95.8  |
| O70551 | <i>Srpk1</i>    | SRSF protein      | High   | 8  | 5  | 6   | 2  | 648  | 73    | 6.19  | 48   | 98.1  | 92.8  | 88.1  | 104   | 109.3 | 107.7 |
| P00158 | <i>Mt-Cyb</i>   | Cytochrome b      | High   | 4  | 2  | 2   | 2  | 381  | 43.2  | 7.97  | 31   | 98.1  | 114.7 | 95    | 103.9 | 95.4  | 92.9  |
| Q3UHH2 | <i>Slc22a23</i> | Solute carrier    | High   | 8  | 6  | 6   | 6  | 689  | 74.3  | 7.83  | 49   | 96.2  | 103.8 | 100.5 | 98.3  | 98.9  | 102.3 |
| Q61585 | <i>G0s2</i>     | G0/G1 switch      | High   | 8  | 1  | 2   | 1  | 103  | 11.1  | 8.32  | 43   |       |       |       |       |       |       |
| P47963 | <i>Rpl13</i>    | 60S ribosomal     | High   | 34 | 8  | 12  | 8  | 211  | 24.3  | 11.55 | 198  | 105.1 | 98.6  | 101.1 | 100.9 | 97.7  | 96.5  |
| Q9ROU0 | <i>Srsf10</i>   | Serine/arginine-  | High   | 13 | 3  | 4   | 3  | 262  | 31.3  | 11.27 | 70   | 94.6  | 103.4 | 100.1 | 104.9 | 96.3  | 100.7 |
| Q8BGN5 | <i>Nipal3</i>   | NIPA-like protein | Medium | 5  | 1  | 1   | 1  | 410  | 44.8  | 7.75  | 0    | 103.8 | 92.3  | 102.9 | 99.8  | 99.2  | 102   |
| Q8BPM2 | <i>Map4k5</i>   | Mitogen-          | High   | 1  | 1  | 1   | 1  | 847  | 95    | 7.83  | 0    | 98.7  | 95.1  | 100.7 | 92    | 110.7 | 102.8 |
| Q61129 | <i>Cfi</i>      | Complement        | High   | 3  | 2  | 2   | 2  | 603  | 67.2  | 7.46  | 42   | 143.1 | 76.2  | 184.6 | 62.1  | 62.6  | 71.4  |
| Q7TSH8 | <i>Tmem94</i>   | Transmembrane     | Medium | 1  | 1  | 1   | 1  | 1360 | 151.7 | 6.46  | 0    | 103.1 | 102.8 | 102   | 102.7 | 93.2  | 96.1  |
| Q3UV70 | <i>Pdp1</i>     | [Pyruvate         | High   | 18 | 6  | 9   | 6  | 538  | 61.1  | 6.67  | 175  | 92.7  | 97.9  | 95.6  | 108.6 | 98.9  | 106.3 |
| Q9ERL9 | <i>Gucy1a1</i>  | Guanylate         | High   | 8  | 4  | 6   | 4  | 691  | 77.5  | 7.17  | 76   | 100.4 | 97.7  | 92.4  | 102.1 | 102.8 | 104.6 |
| Q8BGS7 | <i>Cept1</i>    | Choline/ethanola  | Medium | 3  | 1  | 1   | 1  | 416  | 46.4  | 8.1   | 20   | 112.8 | 69.9  | 76.2  | 128.9 | 85.3  | 126.9 |
| E9Q4S1 | <i>Pde8b</i>    | High affinity     | High   | 1  | 1  | 1   | 1  | 865  | 96.7  | 6.86  | 26   |       |       |       |       |       |       |
| Q9QZM0 | <i>Ubqln2</i>   | Ubiquilin-2       | High   | 24 | 8  | 24  | 6  | 638  | 67.3  | 5.22  | 481  | 97    | 102.5 | 95.8  | 98.9  | 101.2 | 104.6 |
| Q9QZE5 | <i>Copg1</i>    | Coatomer          | High   | 20 | 13 | 21  | 12 | 874  | 97.5  | 5.35  | 376  | 107   | 94.9  | 113.9 | 93.1  | 94.1  | 97    |
| P59759 | <i>Mrtfb</i>    | Myocardin-        | High   | 9  | 7  | 8   | 7  | 1080 | 117.5 | 6.16  | 55   | 100.3 | 102.5 | 103.3 | 102.2 | 92.2  | 99.6  |
| Q9CXU9 | <i>Eif1b</i>    | Eukaryotic        | High   | 43 | 4  | 4   | 1  | 113  | 12.8  | 7.37  | 136  | 87.1  | 103.1 | 104.9 | 107.4 | 92.3  | 105.1 |
| Q8C033 | <i>Arhgef10</i> | Rho guanine       | High   | 1  | 1  | 1   | 1  | 1345 | 147.9 | 5.73  | 41   | 96.7  | 100.4 | 111.3 | 96.9  | 101.6 | 93    |
| Q9JHW2 | <i>Nit2</i>     | Omega-amidase     | High   | 25 | 5  | 8   | 5  | 276  | 30.5  | 6.9   | 206  | 111.6 | 97.7  | 107.1 | 96.3  | 93.9  | 93.4  |
| Q99LC3 | <i>Ndufa10</i>  | NADH              | High   | 44 | 15 | 24  | 15 | 355  | 40.6  | 7.78  | 450  | 96.6  | 104.6 | 91.8  | 104.8 | 102   | 100.2 |
| P14069 | <i>S100a6</i>   | Protein S100-A6   | High   | 19 | 2  | 2   | 2  | 89   | 10    | 5.48  | 32   | 138.3 | 115.3 | 172.3 | 57.2  | 57.5  | 59.5  |
| Q99PL6 | <i>Ubxn6</i>    | UBX domain-       | High   | 31 | 12 | 16  | 12 | 442  | 49.8  | 8.54  | 249  | 97.1  | 97    | 95.2  | 104.3 | 102   | 104.4 |
| F8VPZ9 | <i>Bicra</i>    | BRD4-interacting  | Medium | 1  | 1  | 1   | 1  | 1578 | 161.3 | 6.76  | 0    |       |       |       |       |       |       |
| Q9QXE7 | <i>Tbl1x</i>    | F-box-like/WD     | High   | 7  | 3  | 3   | 1  | 527  | 56.8  | 5.72  | 75   |       |       |       |       |       |       |
| E9Q5C9 | <i>Nolc1</i>    | Nucleolar and     | High   | 4  | 3  | 3   | 3  | 702  | 73.7  | 9.36  | 21   | 94.2  | 99.2  | 100.9 | 100.9 | 102.9 | 101.8 |
| Q8CH18 | <i>Ccar1</i>    | Cell division     | High   | 8  | 7  | 9   | 7  | 1146 | 132   | 5.76  | 154  | 102.3 | 99.7  | 100.6 | 100.9 | 98.2  | 98.3  |
| Q8K1E0 | <i>Stx5</i>     | Syntaxin-5        | High   | 12 | 3  | 3   | 3  | 355  | 39.7  | 8.92  | 118  | 98    | 102.2 | 92.9  | 101.6 | 104.9 | 100.4 |
| Q3ULF4 | <i>Spg7</i>     | Paraplegin        | High   | 9  | 5  | 5   | 5  | 781  | 85.9  | 9.04  | 103  | 97.8  | 101.7 | 92    | 102.3 | 104.7 | 101.5 |
| Q91ZZ3 | <i>Sncb</i>     | Beta-synuclein    | High   | 51 | 6  | 22  | 2  | 133  | 14    | 4.37  | 514  | 94.5  | 99.2  | 83    | 108.4 | 110.1 | 104.7 |
| P19137 | <i>Lama1</i>    | Laminin subunit   | High   | 1  | 2  | 2   | 2  | 3083 | 337.9 | 6.71  | 60   | 102.8 | 99.9  | 92.7  | 92.5  | 107.5 | 104.6 |
| Q9QZQ1 | <i>Afdn</i>     | Afadin OS=Mus     | High   | 20 | 27 | 36  | 27 | 1820 | 206.4 | 6.32  | 442  | 98.7  | 98.5  | 99.1  | 101.9 | 99.8  | 102   |
| Q61286 | <i>Tcf12</i>    | Transcription     | Medium | 1  | 1  | 1   | 1  | 706  | 75.8  | 6.9   | 20   | 83.8  | 112.9 | 99.9  | 114.1 | 90    | 99.3  |
| Q8BYI6 | <i>Lpca2</i>    | Lysophosphatidy   | High   | 4  | 2  | 3   | 2  | 544  | 60.2  | 5.83  | 74   | 133.9 | 115.8 | 140.5 | 68.9  | 72.2  | 68.6  |
| P54276 | <i>Msh6</i>     | DNA mismatch      | Medium | 1  | 1  | 1   | 1  | 1358 | 151   | 6.73  | 0    | 98    | 113.1 | 93.5  | 92    | 101.7 | 101.8 |
| Q99K01 | <i>Pdxdc1</i>   | Pyridoxal-        | High   | 15 | 10 | 13  | 10 | 787  | 87.3  | 5.48  | 182  | 101.2 | 97.5  | 104.2 | 99.3  | 96.6  | 101.1 |
| Q3UHL1 | <i>Camkv</i>    | CaM kinase-like   | High   | 51 | 20 | 33  | 20 | 512  | 54.8  | 5.54  | 572  | 93.8  | 90.7  | 96.1  | 102.1 | 109   | 108.3 |
| Q76LS9 | <i>Mindy1</i>   | Ubiquitin         | High   | 4  | 1  | 1   | 1  | 468  | 51.2  | 4.73  | 27   | 87.7  | 98.2  | 90.6  | 93.4  | 100.9 | 129.2 |
| Q9EPW0 | <i>Inpp4a</i>   | Inositol          | High   | 15 | 12 | 18  | 12 | 939  | 105.5 | 7.05  | 169  | 99.7  | 95.6  | 95.1  | 102.1 | 104.8 | 102.7 |
| Q9CQ20 | <i>Mid1ip1</i>  | Mid1-interacting  | Medium | 5  | 1  | 1   | 1  | 182  | 20.3  | 5.5   | 0    |       |       |       |       |       |       |
| Q9D6G9 | <i>Cmtm5</i>    | CKLF-like         | High   | 17 | 2  | 3   | 2  | 156  | 17.4  | 4.84  | 59   | 94.1  | 104.9 | 98.4  | 108   | 96.4  | 98.1  |
| P56393 | <i>Cox7b</i>    | Cytochrome c      | Low    | 9  | 1  | 1   | 1  | 80   | 9     | 10.27 | 0    | 96.4  | 100.3 | 90.3  | 111.5 | 104   | 97.6  |
| Q9R0P6 | <i>Sec11a</i>   | Signal peptidase  | High   | 16 | 3  | 3   | 3  | 179  | 20.6  | 9.33  | 51   | 99.4  | 105.4 | 102.9 | 99.3  | 99.3  | 93.7  |

|        |                 |                    |        |    |    |     |    |      |       |       |      |       |       |       |       |       |       |
|--------|-----------------|--------------------|--------|----|----|-----|----|------|-------|-------|------|-------|-------|-------|-------|-------|-------|
| Q5DTY9 | <i>Kctd16</i>   | BTB/POZ            | High   | 24 | 10 | 16  | 10 | 427  | 48.9  | 8.19  | 184  | 94.7  | 105.1 | 83.8  | 110.5 | 102.5 | 103.3 |
| B2RRE7 | <i>Otud4</i>    | OTU domain-        | High   | 2  | 1  | 1   | 1  | 1107 | 123   | 6.76  | 27   | 94.5  | 100.1 | 96.7  | 105.8 | 100.1 | 102.8 |
| Q9D187 | <i>Ciao2b</i>   | Cytosolic iron-    | High   | 13 | 1  | 1   | 1  | 163  | 17.7  | 4.98  | 53   | 94    | 99.1  | 90.6  | 90.8  | 117   | 108.5 |
| Q6NZM9 | <i>Hdac4</i>    | Histone            | High   | 3  | 3  | 4   | 3  | 1076 | 118.5 | 6.92  | 44   | 108.8 | 90.6  | 97.3  | 106.9 | 98.3  | 98.2  |
| Q99PU8 | <i>Dhx30</i>    | ATP-dependent      | High   | 11 | 12 | 13  | 12 | 1217 | 136.6 | 8.75  | 125  | 96.3  | 98.1  | 93.7  | 105.4 | 103   | 103.6 |
| Q9Z127 | <i>Slc7a5</i>   | Large neutral      | High   | 6  | 3  | 3   | 3  | 512  | 55.8  | 7.9   | 26   | 96.6  | 109.1 | 102.5 | 103.8 | 92.6  | 95.4  |
| P34914 | <i>Ephx2</i>    | Bifunctional       | High   | 21 | 7  | 11  | 7  | 554  | 62.5  | 6.19  | 303  | 106.2 | 105   | 105.9 | 90.3  | 98    | 94.4  |
| P14685 | <i>Psmd3</i>    | 26S proteasome     | High   | 37 | 19 | 28  | 19 | 530  | 60.7  | 8.44  | 461  | 100.4 | 98.8  | 97.9  | 101.1 | 100.8 | 101   |
| Q99KI0 | <i>Aco2</i>     | Aconitate          | High   | 58 | 39 | 162 | 39 | 780  | 85.4  | 7.93  | 2668 | 96.2  | 102.7 | 92.2  | 105   | 101.6 | 102.3 |
| Q9QXY6 | <i>Ehd3</i>     | EH domain-         | High   | 61 | 22 | 29  | 15 | 535  | 60.8  | 6.46  | 426  | 99.7  | 101.4 | 102.4 | 94.2  | 101.9 | 100.5 |
| Q8VD57 | <i>Sft2d2</i>   | Vesicle transport  | High   | 11 | 1  | 1   | 1  | 159  | 17.5  | 9.09  | 32   |       |       |       |       |       |       |
| Q8VDD5 | <i>Myh9</i>     | Myosin-9           | High   | 44 | 78 | 123 | 61 | 1960 | 226.2 | 5.66  | 2046 | 113.9 | 105.4 | 126.8 | 82.5  | 85.1  | 86.3  |
| Q921N6 | <i>Ddx27</i>    | Probable ATP-      | Medium | 1  | 1  | 1   | 1  | 760  | 85.9  | 9.25  | 34   |       |       |       |       |       |       |
| Q8VE38 | <i>Oxnad1</i>   | Oxidoreductase     | High   | 6  | 2  | 2   | 2  | 311  | 34.7  | 8.13  | 31   | 99.1  | 95.9  | 103.6 | 100.3 | 100.4 | 100.7 |
| Q9CQ54 | <i>Ndufc2</i>   | NADH               | High   | 35 | 6  | 11  | 6  | 120  | 14.2  | 9.2   | 153  | 93.3  | 99.7  | 90.1  | 109.2 | 106.3 | 101.4 |
| Q61733 | <i>Mrps31</i>   | 28S ribosomal      | High   | 12 | 4  | 4   | 3  | 384  | 43.9  | 8.51  | 54   | 95.2  | 104.4 | 90.2  | 102.9 | 100.4 | 106.9 |
| Q9D358 | <i>Acp1</i>     | Low molecular      | High   | 40 | 5  | 8   | 5  | 158  | 18.2  | 6.74  | 162  | 102   | 103.6 | 97.5  | 100.4 | 100.4 | 96    |
| Q9CZC8 | <i>Scrn1</i>    | Secernin-1         | High   | 45 | 14 | 25  | 14 | 414  | 46.3  | 4.79  | 535  | 95.2  | 96.6  | 91.2  | 103.5 | 106.9 | 106.6 |
| O70152 | <i>Dpm1</i>     | Dolichol-          | High   | 21 | 5  | 5   | 5  | 260  | 29.2  | 9.51  | 71   | 99.9  | 102.6 | 103.6 | 99.8  | 97.5  | 96.7  |
| Q8K4Z0 | <i>Lgi2</i>     | Leucine-rich       | High   | 7  | 3  | 3   | 3  | 550  | 63    | 6.54  | 35   | 99.7  | 102.7 | 85.9  | 103.3 | 103   | 105.4 |
| Q9R1Z7 | <i>Pts</i>      | 6-pyruvoyl         | High   | 24 | 3  | 4   | 3  | 144  | 16.2  | 6.52  | 83   | 101   | 94.3  | 99.8  | 102.1 | 100.9 | 102   |
| Q8VH37 | <i>Hdac8</i>    | Histone            | Low    | 5  | 1  | 1   | 1  | 377  | 41.7  | 6.16  | 0    | 101.2 | 89    | 101.5 | 99.6  | 94.8  | 113.9 |
| Q61097 | <i>Ksr1</i>     | Kinase             | Medium | 1  | 1  | 1   | 1  | 873  | 96.7  | 8.54  | 17   | 88    | 103.1 | 93.7  | 99.2  | 108.5 | 107.6 |
| Q61183 | <i>Papola</i>   | Poly(A)            | High   | 8  | 5  | 5   | 5  | 739  | 82.3  | 7.34  | 79   | 102.1 | 105.1 | 105.2 | 90.4  | 99.6  | 97.6  |
| O70433 | <i>Fhl2</i>     | Four and a half    | High   | 9  | 3  | 4   | 3  | 279  | 32.1  | 7.3   | 30   | 80.6  | 91.6  | 100.6 | 123.3 | 107.1 | 96.8  |
| P35283 | <i>Rab12</i>    | Ras-related        | High   | 39 | 9  | 18  | 8  | 243  | 27.3  | 8.41  | 251  | 101   | 100.3 | 104.6 | 102.1 | 98.1  | 94    |
| Q6PGH0 | <i>Ubt2</i>     | Ubiquitin          | High   | 15 | 3  | 3   | 3  | 234  | 26.1  | 5.83  | 35   | 99    | 103.2 | 85.8  | 105.3 | 103.5 | 103.2 |
| Q9WUV0 | <i>Orc5</i>     | Origin             | Low    | 2  | 1  | 1   | 1  | 435  | 50.2  | 8.06  | 0    |       |       |       |       |       |       |
| P84104 | <i>Srsf3</i>    | Serine/arginine-   | High   | 23 | 4  | 7   | 3  | 164  | 19.3  | 11.65 | 64   | 98.2  | 102.6 | 93.1  | 117   | 90.8  | 98.3  |
| Q9CZM2 | <i>Rpl15</i>    | 60S ribosomal      | High   | 25 | 5  | 6   | 5  | 204  | 24.1  | 11.62 | 139  | 100.7 | 96.2  | 101.8 | 101.2 | 98    | 102.2 |
| Q924X1 | <i>Epgn</i>     | Epigen OS=Mus      | Medium | 9  | 1  | 1   | 1  | 152  | 16.8  | 6.64  | 0    |       |       |       |       |       |       |
| Q91VF2 | <i>Hnmt</i>     | Histamine N-       | High   | 15 | 4  | 4   | 4  | 295  | 33.6  | 5.06  | 71   | 105.8 | 106.8 | 101.3 | 95.4  | 94    | 96.7  |
| Q80TA6 | <i>Mttr12</i>   | Myotubularin-      | High   | 4  | 3  | 3   | 3  | 747  | 85.5  | 6.84  | 42   | 99.7  | 104.2 | 92.4  | 98.8  | 103.7 | 101.3 |
| P06330 |                 | Ig heavy chain V   | High   | 31 | 3  | 4   | 3  | 118  | 12.9  | 7.11  | 92   | 177.1 | 68.4  | 250.6 | 33.8  | 36.8  | 33.4  |
| Q6IRU5 | <i>Cltb</i>     | Clathrin light     | High   | 40 | 10 | 22  | 10 | 229  | 25.2  | 4.63  | 356  | 97.3  | 103.2 | 87.5  | 104.5 | 103.9 | 103.6 |
| Q6DFY8 | <i>Brinp2</i>   | BMP/retinoic       | High   | 7  | 5  | 7   | 5  | 783  | 89.2  | 7.88  | 85   | 97.5  | 93.1  | 93.5  | 106.6 | 108.4 | 101   |
| Q5Y5T5 | <i>Zdhhc8</i>   | Palmitoyltransfer  | Medium | 2  | 1  | 1   | 1  | 762  | 82    | 9.38  | 19   |       |       |       |       |       |       |
| Q91Z53 | <i>Grhpr</i>    | Glyoxylate         | High   | 37 | 11 | 16  | 11 | 328  | 35.3  | 7.65  | 268  | 97.5  | 101.9 | 94.5  | 100.1 | 98.8  | 107.1 |
| P19324 | <i>Serpinh1</i> | Serpin H1          | High   | 25 | 9  | 11  | 9  | 417  | 46.5  | 8.82  | 158  | 108.1 | 108.5 | 121.5 | 85    | 87.4  | 89.4  |
| Q8BYB9 | <i>Poglut1</i>  | Protein O-         | High   | 2  | 1  | 1   | 1  | 392  | 46.4  | 8.85  | 43   | 105.2 | 108.8 | 106.7 | 92.8  | 98.4  | 88.1  |
| Q3TIR3 | <i>Ric8a</i>    | Synembryn-A        | High   | 10 | 5  | 5   | 5  | 530  | 59.8  | 5.68  | 70   | 93.9  | 100.2 | 98.6  | 101.3 | 95.9  | 110.1 |
| Q91YE6 | <i>Ipo9</i>     | Importin-9         | High   | 17 | 14 | 21  | 14 | 1041 | 116   | 4.81  | 404  | 95.4  | 101.7 | 92.5  | 104.6 | 102.4 | 103.5 |
| Q8VBT0 | <i>Tmx1</i>     | Thioredoxin-       | High   | 7  | 2  | 3   | 2  | 278  | 31.4  | 5.29  | 41   | 100   | 99.6  | 108.5 | 97.1  | 95.7  | 99    |
| Q9JIK5 | <i>Ddx21</i>    | Nucleolar RNA      | Medium | 2  | 1  | 1   | 1  | 851  | 93.5  | 9.11  | 18   | 100.1 | 96.9  | 95.5  | 104.8 | 103.3 | 99.3  |
| P20722 | <i>Bmp6</i>     | Bone               | Low    | 4  | 1  | 1   | 1  | 510  | 56.4  | 7.87  | 0    | 80    | 98.8  | 93.5  | 98.4  | 126.5 | 102.8 |
| Q9JJN5 | <i>Cpn1</i>     | Carboxypeptidas    | High   | 5  | 2  | 2   | 2  | 457  | 51.8  | 8.28  | 35   | 125.1 | 77.9  | 162.5 | 70    | 84.1  | 80.5  |
| Q59J78 | <i>Ndufaf2</i>  | NADH               | High   | 51 | 8  | 8   | 8  | 168  | 19.6  | 8.25  | 109  | 97.2  | 104.4 | 99.4  | 101.7 | 99.3  | 98    |
| P99026 | <i>Psmb4</i>    | Proteasome         | High   | 45 | 7  | 11  | 7  | 264  | 29.1  | 5.64  | 288  | 109   | 99.1  | 103.3 | 92.2  | 97.8  | 98.6  |
| Q99MR0 | <i>Actl6b</i>   | Actin-like protein | High   | 16 | 4  | 5   | 3  | 426  | 46.9  | 5.71  | 53   | 95    | 112.4 | 83.9  | 104.2 | 102.7 | 101.6 |
| Q8CCN5 | <i>Bcas3</i>    | Breast             | High   | 12 | 8  | 10  | 8  | 928  | 101   | 6.7   | 137  | 95.7  | 98.8  | 101   | 101.7 | 100.4 | 102.4 |
| Q9CY27 | <i>Tecr</i>     | Very-long-chain    | High   | 22 | 8  | 14  | 8  | 308  | 36.1  | 9.55  | 178  | 101.2 | 104.8 | 96.2  | 103.5 | 98.1  | 96.3  |
| Q6PHS6 | <i>Snx13</i>    | Sorting nexin-13   | High   | 2  | 2  | 2   | 2  | 957  | 110.7 | 6.62  | 30   | 74.6  | 70.2  | 73.3  | 138.7 | 82.6  | 160.5 |
| B2RXC1 | <i>Trappc11</i> | Trafficking        | High   | 9  | 7  | 7   | 7  | 1133 | 128.3 | 7.58  | 97   | 98.9  | 97.1  | 99.7  | 99.2  | 102.7 | 102.3 |
| P28571 | <i>Slc6a9</i>   | Sodium- and        | High   | 3  | 2  | 2   | 2  | 692  | 76.5  | 7.81  | 46   | 115.9 | 103.6 | 131.6 | 82.5  | 79.4  | 87    |
| Q8K2Y7 | <i>Mrp147</i>   | 39S ribosomal      | High   | 8  | 2  | 2   | 2  | 252  | 29.7  | 10.21 | 54   | 108.9 | 93.4  | 88.9  | 113.3 | 98.4  | 97.1  |
| Q58A65 | <i>Spag9</i>    | C-Jun-amino-       | High   | 13 | 14 | 15  | 10 | 1321 | 146.1 | 5.15  | 220  | 94.5  | 99.5  | 96.3  | 101.9 | 105.9 | 101.9 |
| Q8BS95 | <i>Gpr89</i>    | Golgi pH           | High   | 5  | 2  | 3   | 2  | 455  | 52.7  | 9.22  | 35   | 95.6  | 113.2 | 85    | 104.7 | 102.5 | 99    |
| Q9Z0J4 | <i>Nos1</i>     | Nitric oxide       | High   | 13 | 17 | 19  | 17 | 1429 | 160.4 | 7.15  | 251  | 104.7 | 91.1  | 117.4 | 88.1  | 99.2  | 99.7  |
| E9Q735 | <i>Ube4a</i>    | Ubiquitin          | High   | 3  | 3  | 3   | 3  | 1028 | 118.1 | 5.33  | 42   | 96.5  | 100.2 | 102.6 | 98.4  | 101   | 101.4 |
| P08074 | <i>Cbr2</i>     | Carbonyl           | Medium | 3  | 1  | 1   | 1  | 244  | 25.9  | 9.01  | 23   |       |       |       |       |       |       |
| Q61831 | <i>Mapk10</i>   | Mitogen-           | High   | 20 | 8  | 15  | 3  | 464  | 52.5  | 6.96  | 259  | 96.8  | 107.5 | 90.1  | 101.8 | 104.9 | 98.9  |
| Q8K2Q0 | <i>Commf9</i>   | COMM domain-       | High   | 25 | 3  | 4   | 3  | 198  | 21.8  | 5.82  | 112  | 97    | 100   | 101.9 | 96.5  | 97.8  | 106.8 |
| P62823 | <i>Rab3c</i>    | Ras-related        | High   | 56 | 10 | 34  | 7  | 227  | 25.9  | 5.24  | 638  | 91.4  | 88.9  | 99.3  | 103.8 | 109.7 | 106.9 |
| Q9QXL1 | <i>Kif21b</i>   | Kinesin-like       | High   | 3  | 4  | 7   | 1  | 1668 | 186.1 | 7.08  | 70   |       |       |       |       |       |       |
| Q9JIA1 | <i>Lgi1</i>     | Leucine-rich       | High   | 25 | 14 | 32  | 14 | 557  | 63.6  | 8.02  | 435  | 96.2  | 109.1 | 90.5  | 103.2 | 101.4 | 99.6  |
| Q80XU8 | <i>Lrfn4</i>    | Leucine-rich       | High   | 8  | 4  | 5   | 4  | 636  | 67.2  | 6.81  | 20   | 91.6  | 96.5  | 88.7  | 102.8 | 101   | 119.3 |
| P21836 | <i>Ache</i>     | Acetylcholinester  | High   | 7  | 3  | 3   | 3  | 614  | 68.1  | 6.33  | 25   | 91.2  | 96.8  | 88.9  | 96.4  | 113.3 | 113.4 |
| Q3UFS4 | <i>Gpatch11</i> | G patch domain-    | High   | 5  | 1  | 1   | 1  | 262  | 30.6  | 5.08  | 0    |       |       |       |       |       |       |

|        |                 |                   |        |    |    |     |    |      |       |      |      |       |       |       |       |       |       |
|--------|-----------------|-------------------|--------|----|----|-----|----|------|-------|------|------|-------|-------|-------|-------|-------|-------|
| Q8VBW1 | <i>Slc6a8</i>   | Sodium- and       | High   | 3  | 2  | 3   | 1  | 640  | 71    | 6.61 | 48   |       |       |       |       |       |       |
| Q9ES34 | <i>Ube3b</i>    | Ubiquitin-protein | High   | 3  | 3  | 3   | 3  | 1070 | 122.7 | 8.32 | 44   | 96.6  | 104.6 | 89.2  | 109.3 | 103.4 | 96.8  |
| P26645 | <i>Marcks</i>   | Myristoylated     | High   | 28 | 5  | 13  | 5  | 309  | 29.6  | 4.34 | 249  | 106.5 | 95.4  | 100.6 | 99.1  | 99.1  | 99.3  |
| Q91WA3 | <i>Hdac11</i>   | Histone           | High   | 5  | 2  | 2   | 2  | 347  | 39.1  | 7.14 | 37   | 86.6  | 94.7  | 95.8  | 111.5 | 107.9 | 103.4 |
| P61407 | <i>Tdrd6</i>    | Tudor domain-     | Medium | 1  | 1  | 2   | 1  | 2134 | 237.8 | 5.36 | 0    | 103.5 | 113.1 | 104.4 | 91.8  | 99.4  | 87.8  |
| Q8BM13 | <i>Olfm2</i>    | Noelin-2          | High   | 8  | 4  | 5   | 4  | 448  | 50.7  | 8.51 | 55   | 95.5  | 108.1 | 86.7  | 108.7 | 100.3 | 100.7 |
| Q9R062 | <i>Gyg1</i>     | Glycogenin-1      | High   | 14 | 4  | 5   | 4  | 333  | 37.4  | 5.29 | 63   | 102.7 | 106   | 112   | 93.5  | 95.3  | 90.5  |
| P49446 | <i>Ptpre</i>    | Receptor-type     | High   | 5  | 3  | 4   | 2  | 699  | 80.6  | 7.12 | 81   | 104.5 | 90.8  | 104.9 | 92.4  | 100.1 | 107.3 |
| Q9D7X8 | <i>Ggct</i>     | Gamma-            | High   | 30 | 5  | 6   | 5  | 188  | 21.2  | 5.67 | 122  | 95.3  | 99.4  | 96.3  | 103.6 | 100.3 | 105.2 |
| P18242 | <i>Ctsd</i>     | Cathepsin D       | High   | 34 | 11 | 33  | 11 | 410  | 44.9  | 7.15 | 608  | 133.1 | 105.1 | 151.4 | 69.2  | 70.1  | 71    |
| Q8K0T0 | <i>Rtn1</i>     | Reticulon-1       | High   | 31 | 20 | 39  | 19 | 780  | 83.5  | 4.58 | 688  | 96    | 97.2  | 95.9  | 101.6 | 106.7 | 102.6 |
| Q8BGA3 | <i>Lrrtm2</i>   | Leucine-rich      | High   | 9  | 5  | 5   | 5  | 515  | 58.8  | 8    | 33   | 95.2  | 97.1  | 87.2  | 107.2 | 104.7 | 108.6 |
| Q6ZQ58 | <i>Larp1</i>    | La-related        | High   | 5  | 5  | 6   | 5  | 1072 | 121.1 | 8.79 | 38   | 95.2  | 100.1 | 105.5 | 107.8 | 98.4  | 93    |
| O55042 | <i>Snca</i>     | Alpha-synuclein   | High   | 60 | 10 | 51  | 7  | 140  | 14.5  | 4.77 | 1518 | 95.3  | 97.5  | 86.6  | 102.7 | 111.5 | 106.4 |
| Q8K4Z3 | <i>Naxe</i>     | NAD(P)H-          | High   | 26 | 5  | 13  | 5  | 282  | 31    | 7.69 | 273  | 98.6  | 104.6 | 93.9  | 100.8 | 102.2 | 99.9  |
| Q91WC9 | <i>Daglb</i>    | Diacylglycerol    | High   | 5  | 3  | 3   | 3  | 669  | 73.9  | 6.73 | 42   | 105.6 | 88.9  | 103.1 | 104.8 | 94.1  | 103.5 |
| Q9D2V5 | <i>Aar2</i>     | Protein AAR2      | Medium | 5  | 1  | 1   | 1  | 384  | 43.4  | 5.48 | 0    |       |       |       |       |       |       |
| Q8BMK4 | <i>Ckap4</i>    | Cytoskeleton-     | High   | 34 | 16 | 19  | 16 | 575  | 63.7  | 5.64 | 327  | 102.9 | 95.3  | 107.3 | 96.3  | 98.4  | 99.8  |
| P10630 | <i>Eif4a2</i>   | Eukaryotic        | High   | 48 | 19 | 38  | 10 | 407  | 46.4  | 5.48 | 606  | 101.7 | 101.9 | 94.2  | 105   | 98.4  | 98.8  |
| Q8R059 | <i>Gale</i>     | UDP-glucose 4-    | High   | 11 | 2  | 2   | 2  | 347  | 38.2  | 6.74 | 55   | 96.8  | 96.1  | 96.9  | 101.8 | 102.4 | 105.9 |
| Q9D3P8 | <i>Plgrkt</i>   | Plasminogen       | High   | 20 | 3  | 4   | 3  | 147  | 17.3  | 9.5  | 81   | 87    | 91.3  | 91.9  | 101.7 | 112   | 116.1 |
| P07724 | <i>Alb</i>      | Albumin           | High   | 69 | 43 | 209 | 43 | 608  | 68.6  | 6.07 | 3169 | 161.6 | 54.7  | 279   | 32.2  | 35.1  | 37.4  |
| P18654 | <i>Rps6ka3</i>  | Ribosomal         | High   | 11 | 8  | 8   | 2  | 740  | 83.6  | 6.89 | 65   | 108   | 111.5 | 97.3  | 98.8  | 95.1  | 89.3  |
| A2BE28 | <i>Las1l</i>    | Ribosomal         | High   | 2  | 1  | 1   | 1  | 776  | 89.4  | 4.44 | 18   | 97.8  | 96.4  | 82.5  | 128.6 | 99.9  | 94.8  |
| P06797 | <i>Ctsl</i>     | Procathepsin L    | Medium | 5  | 1  | 1   | 1  | 334  | 37.5  | 6.83 | 17   |       |       |       |       |       |       |
| Q8CEE7 | <i>Rdh13</i>    | Retinol           | High   | 4  | 2  | 2   | 2  | 334  | 36.4  | 8.85 | 39   |       |       |       |       |       |       |
| P70302 | <i>Stim1</i>    | Stromal           | High   | 14 | 10 | 12  | 10 | 685  | 77.5  | 6.54 | 149  | 96.6  | 98    | 98.7  | 97.6  | 99.1  | 109.9 |
| Q8BWB6 | <i>Steap2</i>   | Metalloreductase  | Low    | 2  | 1  | 1   | 1  | 489  | 55.7  | 9.2  | 0    |       |       |       |       |       |       |
| Q8BXA5 | <i>Clptm1l</i>  | Cleft lip and     | High   | 2  | 1  | 2   | 1  | 539  | 62.1  | 8.84 | 34   | 94.1  | 100.4 | 94.8  | 101.4 | 107.1 | 102   |
| Q61249 | <i>Igfb1</i>    | Immunoglobulin-   | High   | 8  | 2  | 2   | 2  | 340  | 38.9  | 6.18 | 27   | 87.6  | 100   | 107.6 | 92.3  | 96.1  | 116.4 |
| Q91YP0 | <i>L2hgdh</i>   | L-2-              | High   | 13 | 5  | 6   | 5  | 464  | 50.9  | 8.29 | 103  | 98.7  | 98.2  | 92.7  | 104.2 | 105.2 | 101.1 |
| P50136 | <i>Bckdha</i>   | 2-oxoisovalerate  | High   | 19 | 6  | 7   | 6  | 442  | 50.3  | 8.06 | 116  | 95.3  | 99    | 97.9  | 103.2 | 105.1 | 99.6  |
| Q9ERI6 | <i>Rdh14</i>    | Retinol           | High   | 45 | 11 | 12  | 11 | 334  | 36.3  | 8.18 | 126  | 93.8  | 99.8  | 95.1  | 102.1 | 106.4 | 102.9 |
| O88693 | <i>Ugcg</i>     | Ceramide          | Medium | 4  | 1  | 1   | 1  | 394  | 44.8  | 7.8  | 34   |       |       |       |       |       |       |
| Q6TEK5 | <i>Vkorc1l1</i> | Vitamin K         | High   | 15 | 3  | 4   | 3  | 176  | 19.8  | 8.95 | 62   | 94.2  | 102.5 | 95.3  | 105.9 | 98.4  | 103.7 |
| Q99K74 | <i>Med24</i>    | Mediator of RNA   | High   | 2  | 2  | 2   | 2  | 987  | 109.9 | 6.83 | 41   | 117.3 | 101.5 | 98.2  | 94.8  | 88.7  | 99.4  |
| Q9ERQ8 | <i>Ca7</i>      | Carbonic          | Medium | 4  | 1  | 1   | 1  | 264  | 29.9  | 6.95 | 0    | 87.4  | 113.1 | 90.1  | 103.3 | 102.3 | 103.8 |
| Q8K2B0 | <i>P3h4</i>     | Endoplasmic       | Low    | 2  | 1  | 1   | 1  | 443  | 51.1  | 4.81 | 0    | 105.5 | 95.4  | 98.2  | 83.5  | 104.1 | 113.3 |
| Q61206 | <i>Pafah1b2</i> | Platelet-         | High   | 13 | 2  | 2   | 2  | 229  | 25.6  | 5.92 | 47   | 96    | 97.2  | 96.5  | 104.3 | 106.9 | 99.1  |
| Q3U1Z5 | <i>Gpsm3</i>    | G-protein-        | High   | 11 | 1  | 1   | 1  | 159  | 17.6  | 5.2  | 35   | 103.1 | 103.2 | 94.3  | 99.1  | 99.6  | 100.7 |
| Q8JZN5 | <i>Acad9</i>    | Complex I         | High   | 32 | 17 | 21  | 17 | 625  | 68.7  | 7.46 | 327  | 94.1  | 100.4 | 91.8  | 105.7 | 103.5 | 104.5 |
| Q8BJI1 | <i>Slc6a17</i>  | Sodium-           | High   | 17 | 9  | 17  | 9  | 727  | 81    | 6.23 | 283  | 95.3  | 97.6  | 94.6  | 105.8 | 104.7 | 101.9 |
| P37040 | <i>Por</i>      | NADPH--           | High   | 33 | 19 | 25  | 19 | 678  | 77    | 5.53 | 342  | 100.4 | 101.7 | 102.8 | 98.1  | 97.1  | 99.9  |
| A2APV2 | <i>Fmn12</i>    | Formin-like       | High   | 12 | 13 | 14  | 13 | 1086 | 123   | 7.53 | 235  | 105.7 | 103.1 | 108.7 | 93.1  | 92.4  | 97    |
| Q6ZQ18 | <i>Efr3b</i>    | Protein EFR3      | High   | 22 | 15 | 18  | 14 | 817  | 92.3  | 6.54 | 271  | 99.5  | 101.9 | 97.3  | 98    | 97.5  | 105.9 |
| Q9WTQ5 | <i>Akap12</i>   | A-kinase anchor   | High   | 7  | 8  | 8   | 8  | 1684 | 180.6 | 4.44 | 154  | 98.3  | 99.8  | 98.9  | 98.7  | 101.1 | 103.3 |
| O35969 | <i>Gamt</i>     | Guanidinoacetat   | High   | 24 | 3  | 4   | 3  | 236  | 26.3  | 5.71 | 88   | 96.4  | 107.6 | 98.1  | 101.4 | 93.3  | 103.3 |
| Q8BUY5 | <i>Timmdc1</i>  | Complex I         | High   | 10 | 2  | 2   | 2  | 285  | 31.8  | 9.29 | 46   | 94.1  | 97.7  | 95.7  | 104.7 | 101.1 | 106.6 |
| O09010 | <i>Lfng</i>     | Beta-1,3-N-       | Medium | 7  | 1  | 1   | 1  | 378  | 41.9  | 8.81 | 0    |       |       |       |       |       |       |
| Q9D6J6 | <i>Ndufv2</i>   | NADH              | High   | 53 | 11 | 28  | 11 | 248  | 27.3  | 7.4  | 533  | 95.1  | 102.1 | 94    | 104.2 | 102   | 102.7 |
| Q9D6S7 | <i>Mrrf</i>     | Ribosome-         | High   | 23 | 5  | 7   | 5  | 262  | 29    | 9.85 | 150  | 97    | 98.4  | 88.9  | 102.2 | 101.9 | 111.6 |
| Q4VA53 | <i>Pds5b</i>    | Sister chromatid  | High   | 4  | 6  | 6   | 4  | 1446 | 164.3 | 8.5  | 31   | 101.1 | 95    | 94.5  | 105.7 | 109.2 | 94.5  |
| Q9Z0F7 | <i>Sncg</i>     | Gamma-            | High   | 35 | 4  | 4   | 3  | 123  | 13.2  | 4.65 | 68   | 93    | 104.5 | 88    | 97.7  | 110   | 106.8 |
| P18052 | <i>Ptpre</i>    | Receptor-type     | High   | 19 | 12 | 17  | 11 | 829  | 93.6  | 7.05 | 218  | 100.3 | 96.7  | 95.5  | 99.8  | 103.7 | 103.9 |
| Q6NVF0 | <i>Ocrl</i>     | Inositol          | High   | 16 | 10 | 13  | 10 | 900  | 104.2 | 6.27 | 236  | 94.7  | 96.9  | 94.6  | 104.7 | 103.4 | 105.8 |
| P13020 | <i>Gsn</i>      | Gelsolin          | High   | 20 | 13 | 22  | 13 | 780  | 85.9  | 6.18 | 344  | 117.7 | 100.1 | 140.3 | 79.1  | 81.8  | 81    |
| Q8BYL4 | <i>Yars2</i>    | Tyrosine--tRNA    | High   | 15 | 4  | 4   | 4  | 472  | 52.6  | 9.16 | 60   | 91    | 102.7 | 94.4  | 105.3 | 106.2 | 100.4 |
| Q9D0D3 | <i>Mtpap</i>    | Poly(A) RNA       | High   | 6  | 3  | 3   | 3  | 585  | 65.2  | 8.88 | 55   | 101.4 | 97.6  | 99.9  | 103   | 100.7 | 97.4  |
| Q9CZS1 | <i>Aldh1b1</i>  | Aldehyde          | High   | 24 | 10 | 15  | 9  | 519  | 57.5  | 7.02 | 227  | 89.2  | 87.1  | 90.8  | 111.9 | 110.9 | 110.1 |
| Q3TXS7 | <i>Psm1</i>     | 26S proteasome    | High   | 31 | 21 | 34  | 21 | 953  | 105.7 | 5.39 | 682  | 105.7 | 102.3 | 100.3 | 94.3  | 98.4  | 99    |
| Q9DCS3 | <i>Mecr</i>     | Enoyl-[acyl-      | High   | 19 | 5  | 6   | 5  | 373  | 40.3  | 9.07 | 134  | 94.9  | 101.2 | 94.6  | 101   | 104.4 | 103.8 |
| Q8BKC5 | <i>Ipo5</i>     | Importin-5        | High   | 28 | 22 | 30  | 21 | 1097 | 123.5 | 4.93 | 710  | 98.5  | 103.2 | 97.7  | 100.7 | 98.6  | 101.3 |
| Q9DB30 | <i>Phkg2</i>    | Phosphorylase b   | High   | 4  | 1  | 1   | 1  | 406  | 46.5  | 6.48 | 16   |       |       |       |       |       |       |
| Q8C0D4 | <i>Arhgap12</i> | Rho GTPase-       | Medium | 1  | 1  | 1   | 1  | 838  | 95.3  | 7.59 | 24   | 102.9 | 96.6  | 112   | 88.5  | 95.4  | 104.5 |
| Q9CW46 | <i>Raver1</i>   | Ribonucleoprotei  | High   | 2  | 1  | 1   | 1  | 748  | 79.3  | 8.72 | 23   |       |       |       |       |       |       |
| Q4KMM3 | <i>Oxr1</i>     | Oxidation         | High   | 51 | 37 | 55  | 37 | 866  | 95.9  | 5.33 | 986  | 95.3  | 98.5  | 93.9  | 101.7 | 105.7 | 104.9 |
| P70168 | <i>Kpnb1</i>    | Importin subunit  | High   | 26 | 19 | 36  | 19 | 876  | 97.1  | 4.78 | 725  | 97.9  | 101.7 | 98.7  | 102   | 99.1  | 100.6 |
| Q9QXK3 | <i>Copg2</i>    | Coatomer          | High   | 15 | 11 | 13  | 10 | 871  | 97.6  | 5.8  | 189  | 98    | 98.5  | 96.8  | 98.9  | 98.4  | 109.5 |

|        |                 |                   |        |    |    |    |    |      |       |       |     |       |       |       |       |       |       |
|--------|-----------------|-------------------|--------|----|----|----|----|------|-------|-------|-----|-------|-------|-------|-------|-------|-------|
| Q9ET22 | <i>Dpp7</i>     | Dipeptidyl        | High   | 2  | 1  | 1  | 1  | 506  | 56.2  | 5.39  | 24  | 126   | 82.2  | 161.6 | 70.3  | 77.4  | 82.5  |
| Q5EG47 | <i>Prkaa1</i>   | 5'-AMP-activated  | High   | 8  | 4  | 4  | 2  | 559  | 63.9  | 8.12  | 86  | 102.6 | 99.8  | 113.1 | 103.9 | 97.1  | 83.5  |
| Q8K1C0 | <i>Angel2</i>   | Protein angel     | High   | 2  | 1  | 1  | 1  | 544  | 62.4  | 8.21  | 37  | 106.8 | 91    | 114.3 | 94.8  | 95.7  | 97.4  |
| Q8BP48 | <i>Metap1</i>   | Methionine        | High   | 10 | 3  | 3  | 3  | 386  | 43.2  | 7.17  | 47  | 91.5  | 93    | 106.9 | 101.3 | 97.4  | 110   |
| O08529 | <i>Capn2</i>    | Calpain-2         | High   | 23 | 12 | 18 | 12 | 700  | 79.8  | 4.96  | 231 | 106.8 | 107.5 | 113   | 92.8  | 90.1  | 89.9  |
| Q80X60 | <i>Efcab3</i>   | EF-hand           | Low    | 2  | 1  | 1  | 1  | 432  | 49.7  | 9.51  | 22  | 88.7  | 90.4  | 78.4  | 107.7 | 97.4  | 137.3 |
| Q922H4 | <i>Gmppa</i>    | Mannose-1-        | High   | 13 | 5  | 5  | 5  | 420  | 46.2  | 7.62  | 44  | 100.4 | 96    | 103.1 | 96.3  | 97.7  | 106.6 |
| Q9WUB4 | <i>Dctn6</i>    | Dynactin subunit  | High   | 22 | 4  | 4  | 4  | 190  | 20.7  | 6.67  | 54  | 98.1  | 97.1  | 88.3  | 97.7  | 105.4 | 113.5 |
| Q64112 | <i>Ifit2</i>    | Interferon-       | High   | 5  | 2  | 2  | 2  | 472  | 55    | 7.43  | 36  | 112.8 | 123   | 117.5 | 87.8  | 78.9  | 79.8  |
| P46414 | <i>Cdkn1b</i>   | Cyclin-           | High   | 7  | 1  | 1  | 1  | 197  | 22.2  | 7.02  | 29  | 95.3  | 94.8  | 95.2  | 108.6 | 101.8 | 104.4 |
| Q9JKW0 | <i>Arl6ip1</i>  | ADP-ribosylation  | High   | 5  | 1  | 3  | 1  | 203  | 23.4  | 9.32  | 19  | 93.9  | 93.3  | 121.1 | 92.9  | 100.9 | 97.8  |
| P13707 | <i>Gpd1</i>     | Glycerol-3-       | High   | 60 | 18 | 34 | 16 | 349  | 37.5  | 7.17  | 602 | 99.7  | 108.2 | 104.9 | 98.6  | 93.4  | 95.2  |
| Q8R164 | <i>Bphl</i>     | Valacyclovir      | High   | 34 | 9  | 16 | 9  | 291  | 32.8  | 8.94  | 253 | 98.8  | 107.5 | 96    | 101.5 | 96.4  | 99.8  |
| Q9CZ62 | <i>Cep97</i>    | Centrosomal       | High   | 2  | 1  | 2  | 1  | 856  | 94.6  | 5     | 88  | 87    | 105.4 | 90.6  | 107.7 | 88.5  | 120.8 |
| Q9EQU5 | <i>Set</i>      | Protein SET       | High   | 17 | 4  | 7  | 4  | 289  | 33.4  | 4.32  | 207 | 101.3 | 100.2 | 98.7  | 101.1 | 101   | 97.8  |
| O08992 | <i>Sdcbp</i>    | Syntenin-1        | Medium | 7  | 2  | 2  | 2  | 299  | 32.4  | 7.15  | 15  |       |       |       |       |       |       |
| Q8CC35 | <i>Synpo</i>    | Synaptopodin      | High   | 27 | 16 | 31 | 16 | 929  | 99.5  | 9.42  | 448 | 94.2  | 109.9 | 82.7  | 108.9 | 102.6 | 101.6 |
| Q9ESL0 | <i>Oxct2b</i>   | Succinyl-CoA:3-   | Medium | 4  | 1  | 1  | 1  | 520  | 56.6  | 8.92  | 0   | 114.8 | 79.6  | 107.8 | 96    | 98.8  | 102.9 |
| Q8CE96 | <i>Trmt6</i>    | tRNA              | Medium | 2  | 1  | 1  | 1  | 497  | 55.5  | 6.95  | 19  | 93.5  | 104.7 | 92.5  | 96.9  | 94.9  | 117.6 |
| Q60854 | <i>Serpinb6</i> | Serpin B6         | High   | 46 | 13 | 20 | 13 | 378  | 42.6  | 5.74  | 391 | 102.2 | 102.3 | 111.9 | 93.5  | 95.4  | 94.8  |
| P70407 | <i>Cdh9</i>     | Cadherin-9        | High   | 3  | 2  | 2  | 1  | 786  | 88.2  | 4.96  | 47  |       |       |       |       |       |       |
| Q8R092 |                 | Protein C1orf43   | High   | 15 | 3  | 3  | 3  | 253  | 28.7  | 9.36  | 70  | 98.2  | 100.6 | 94.3  | 100.5 | 101.3 | 105.1 |
| Q91Z49 | <i>Fytd1</i>    | UAP56-            | High   | 6  | 2  | 2  | 2  | 317  | 35.9  | 11.84 | 16  | 94.6  | 101.7 | 94.7  | 102.1 | 101.7 | 105.2 |
| Q9WTR1 | <i>Trpv2</i>    | Transient         | High   | 10 | 5  | 5  | 5  | 756  | 85.9  | 6.99  | 149 | 97.6  | 103.5 | 93.8  | 102.3 | 100.3 | 102.5 |
| A2AT37 | <i>Upf2</i>     | Regulator of      | High   | 3  | 4  | 4  | 4  | 1269 | 147.5 | 5.64  | 41  | 96.2  | 93.1  | 92.9  | 107.4 | 104.1 | 106.3 |
| Q9DBY1 | <i>Syvn1</i>    | E3 ubiquitin-     | High   | 3  | 2  | 2  | 2  | 612  | 67.3  | 6.95  | 15  | 96.3  | 98.2  | 100   | 101.7 | 108.4 | 95.5  |
| Q8R570 | <i>Snap47</i>   | Synaptosomal-     | High   | 50 | 16 | 31 | 16 | 413  | 46.5  | 5.76  | 696 | 97.2  | 101   | 96.9  | 101.1 | 101.5 | 102.3 |
| Q8CE72 | <i>Cplane1</i>  | Ciliogenesis and  | Low    | 0  | 1  | 1  | 1  | 3214 | 358.3 | 6.79  | 0   |       |       |       |       |       |       |
| P63001 | <i>Rac1</i>     | Ras-related C3    | High   | 41 | 8  | 30 | 3  | 192  | 21.4  | 8.5   | 622 | 102.2 | 98.8  | 97.6  | 100.4 | 99.2  | 101.7 |
| O70503 | <i>Hsd17b12</i> | Very-long-chain   | High   | 28 | 6  | 9  | 6  | 312  | 34.7  | 9.52  | 215 | 102.7 | 102   | 106.8 | 97.2  | 95.5  | 95.9  |
| Q920P3 | <i>Brinp1</i>   | BMP/retinoic      | High   | 11 | 9  | 10 | 9  | 760  | 88.6  | 8.97  | 136 | 96.4  | 96.9  | 91.9  | 107.2 | 105.2 | 102.4 |
| Q8K3C0 | <i>Rnasek</i>   | Ribonuclease      | Medium | 9  | 1  | 1  | 1  | 98   | 11    | 7.01  | 28  | 67.9  | 84.6  | 130.7 | 137.1 | 84.9  | 94.7  |
| Q80UJ7 | <i>Rab3gap1</i> | Rab3 GTPase-      | High   | 23 | 20 | 26 | 20 | 981  | 110.1 | 5.73  | 334 | 96.1  | 102.2 | 92.1  | 102.3 | 101.3 | 106   |
| B1AXH1 | <i>Nhs12</i>    | NHS-like protein  | High   | 3  | 2  | 2  | 2  | 1219 | 132.3 | 8.48  | 34  | 86.9  | 95.9  | 110.2 | 95.6  | 102.2 | 109.1 |
| P45376 | <i>Akr1b1</i>   | Aldo-keto         | High   | 52 | 14 | 22 | 14 | 316  | 35.7  | 7.18  | 386 | 100.2 | 102.3 | 101.7 | 97.1  | 99.3  | 99.3  |
| Q9CQ91 | <i>Ndufa3</i>   | NADH              | High   | 50 | 3  | 5  | 3  | 84   | 9.3   | 8.47  | 47  | 96.3  | 106.9 | 89.3  | 106.5 | 100.3 | 100.8 |
| Q9R1P3 | <i>Psmb2</i>    | Proteasome        | High   | 34 | 5  | 8  | 5  | 201  | 22.9  | 7.02  | 134 | 93.5  | 101.7 | 93.7  | 105.8 | 103.3 | 102   |
| P10639 | <i>Txn</i>      | Thioredoxin       | High   | 40 | 5  | 11 | 5  | 105  | 11.7  | 4.92  | 181 | 96.1  | 98.2  | 101.9 | 100.8 | 102.3 | 100.8 |
| Q3UHD9 | <i>Agap2</i>    | Arf-GAP with      | High   | 17 | 19 | 23 | 19 | 1186 | 124.4 | 9.89  | 396 | 95.8  | 96.2  | 94    | 104.4 | 105.6 | 104.1 |
| Q8VE33 | <i>Gdap111</i>  | Ganglioside-      | High   | 38 | 9  | 13 | 9  | 370  | 42.3  | 6.6   | 205 | 93    | 96.2  | 99.8  | 101.6 | 104   | 105.4 |
| Q60887 | <i>Olf148</i>   | Olfactory         | High   | 5  | 2  | 2  | 2  | 310  | 34.6  | 8.76  | 26  | 93.4  | 100   | 100.1 | 104.2 | 100.6 | 101.8 |
| Q9D708 | <i>S100a16</i>  | Protein S100-     | Medium | 10 | 1  | 1  | 1  | 124  | 14.3  | 5.86  | 14  | 106.7 | 103.2 | 96.5  | 102.2 | 91.7  | 99.7  |
| Q9CU62 | <i>Smc1a</i>    | Structural        | High   | 6  | 7  | 8  | 7  | 1233 | 143.1 | 7.64  | 87  | 98    | 100.2 | 102.9 | 101   | 97.9  | 99.9  |
| P11352 | <i>Gpx1</i>     | Glutathione       | High   | 41 | 6  | 8  | 6  | 201  | 22.3  | 7.21  | 101 | 103.2 | 100.7 | 112.4 | 90.3  | 92    | 101.5 |
| Q9DCV4 | <i>Rmdn1</i>    | Regulator of      | High   | 15 | 4  | 4  | 4  | 305  | 35    | 8.7   | 127 | 106   | 104.2 | 94.4  | 98.5  | 96.9  | 100   |
| Q00915 | <i>Rbp1</i>     | Retinol-binding   | High   | 37 | 4  | 5  | 4  | 135  | 15.8  | 5.25  | 109 | 111.5 | 103.4 | 122.6 | 82.2  | 90.3  | 90    |
| Q8K382 | <i>Dennd1a</i>  | DENN domain-      | High   | 4  | 2  | 2  | 2  | 1016 | 111.5 | 6.79  | 35  | 83.3  | 89.8  | 99.8  | 127   | 110.9 | 89.3  |
| Q9DBN4 | <i>P33monox</i> | Putative          | High   | 9  | 3  | 3  | 3  | 303  | 32.7  | 9.42  | 20  | 92.2  | 104.6 | 93.4  | 109.2 | 103.4 | 97.2  |
| O88487 | <i>Dync1i2</i>  | Cytoplasmic       | High   | 20 | 7  | 9  | 7  | 612  | 68.4  | 5.29  | 313 | 100.9 | 105.6 | 92.3  | 101.2 | 100   | 100   |
| P47754 | <i>Capza2</i>   | F-actin-capping   | High   | 65 | 12 | 33 | 10 | 286  | 32.9  | 5.85  | 917 | 96    | 97.9  | 99    | 103.9 | 101.7 | 101.5 |
| Q8VDM4 | <i>Psm2</i>     | 26S proteasome    | High   | 35 | 27 | 35 | 27 | 908  | 100.1 | 5.17  | 473 | 98.9  | 98.9  | 99.1  | 99.4  | 99.6  | 104.2 |
| P20444 | <i>Prkca</i>    | Protein kinase C  | High   | 20 | 13 | 26 | 6  | 672  | 76.8  | 7.14  | 334 | 93.1  | 114.1 | 86.8  | 103.9 | 102.1 | 100   |
| Q61656 | <i>Ddx5</i>     | Probable ATP-     | High   | 35 | 20 | 38 | 15 | 614  | 69.2  | 8.92  | 509 | 102   | 96.7  | 103.4 | 100.2 | 98.5  | 99.2  |
| Q9D0E1 | <i>Hnrmpm</i>   | Heterogeneous     | High   | 36 | 22 | 32 | 22 | 729  | 77.6  | 8.63  | 581 | 106.8 | 96.5  | 110.7 | 95.7  | 94.5  | 95.8  |
| P70698 | <i>Ctps1</i>    | CTP synthase 1    | High   | 16 | 7  | 9  | 6  | 591  | 66.6  | 6.58  | 161 | 107.4 | 95.6  | 108.3 | 95.3  | 94.5  | 98.9  |
| Q9D8S9 | <i>Bola1</i>    | BolA-like protein | High   | 44 | 4  | 6  | 4  | 137  | 14.4  | 8.76  | 105 | 95.5  | 101.5 | 90.6  | 104.9 | 104.1 | 103.4 |
| P03893 | <i>Mtnd2</i>    | NADH-             | High   | 5  | 1  | 1  | 1  | 345  | 38.7  | 9.92  | 14  |       |       |       |       |       |       |
| Q91V12 | <i>Acot7</i>    | Cytosolic acyl    | High   | 34 | 11 | 30 | 11 | 381  | 42.5  | 8.68  | 401 | 100.9 | 100.9 | 100.5 | 98.2  | 99.9  | 99.6  |
| P55821 | <i>Stmn2</i>    | Stathmin-2        | High   | 21 | 5  | 9  | 2  | 179  | 20.8  | 8.32  | 157 | 101.2 | 103.9 | 95.4  | 95.3  | 105   | 99.1  |
| Q9D273 | <i>Mwab</i>     | Corrinoid         | High   | 19 | 4  | 5  | 4  | 237  | 26.3  | 9.2   | 45  | 96.1  | 103.7 | 87.8  | 101.6 | 109.6 | 101.1 |
| P51880 | <i>Fabp7</i>    | Fatty acid-       | High   | 52 | 5  | 10 | 5  | 132  | 14.9  | 5.63  | 148 | 113.9 | 113.1 | 123.2 | 80.8  | 85.9  | 83    |
| Q01815 | <i>Cacna1c</i>  | Voltage-          | High   | 1  | 2  | 2  | 2  | 2139 | 240   | 6.87  | 32  | 95.5  | 100.8 | 96.1  | 112.9 | 103.9 | 90.8  |
| Q52KF3 | <i>Spire1</i>   | Protein spire     | High   | 8  | 5  | 6  | 5  | 598  | 68.4  | 9.01  | 41  | 95.3  | 104.6 | 87    | 101.4 | 106.4 | 105.2 |
| Q811I0 | <i>Atpaf1</i>   | ATP synthase      | High   | 14 | 3  | 4  | 3  | 324  | 36.3  | 8.19  | 122 | 94.9  | 106.5 | 87.9  | 109.7 | 100.3 | 100.8 |
| P06728 | <i>Apoa4</i>    | Apolipoprotein    | High   | 21 | 7  | 9  | 7  | 395  | 45    | 5.47  | 130 | 137.1 | 76    | 184.9 | 67.6  | 65.9  | 68.5  |
| Q61103 | <i>Dpf2</i>     | Zinc finger       | High   | 4  | 1  | 1  | 1  | 391  | 44.2  | 6.47  | 16  | 99.7  | 118.4 | 80.3  | 92.1  | 107.9 | 101.6 |
| Q62432 | <i>Smad2</i>    | Mothers against   | High   | 10 | 4  | 5  | 4  | 467  | 52.2  | 6.58  | 47  | 99.6  | 96.9  | 95    | 108.1 | 100.4 | 99.9  |
| Q9R1C6 | <i>Dgke</i>     | Diacylglycerol    | High   | 13 | 6  | 7  | 6  | 564  | 63.6  | 7.44  | 142 | 95    | 101.8 | 96.5  | 104.7 | 99    | 102.9 |

|         |                  |                   |        |    |    |     |    |      |       |       |      |       |       |       |       |       |       |
|---------|------------------|-------------------|--------|----|----|-----|----|------|-------|-------|------|-------|-------|-------|-------|-------|-------|
| Q3U319  | <i>Rnf40</i>     | E3 ubiquitin-     | High   | 3  | 3  | 4   | 2  | 1001 | 113.9 | 6.48  | 46   |       |       |       |       |       |       |
| Q9EQZ7  | <i>Rims2</i>     | Regulating        | High   | 2  | 2  | 2   | 1  | 1530 | 172.8 | 9.25  | 61   | 101.6 | 94    | 93.7  | 100.9 | 103   | 106.9 |
| P60762  | <i>Morf4l1</i>   | Mortality factor  | High   | 4  | 1  | 1   | 1  | 362  | 41.5  | 9.32  | 43   | 96.5  | 87.1  | 108   | 111   | 104.6 | 92.7  |
| P62751  | <i>Rpl23a</i>    | 60S ribosomal     | High   | 40 | 9  | 15  | 9  | 156  | 17.7  | 10.45 | 151  | 100.3 | 96.5  | 101.4 | 103.6 | 101.7 | 96.4  |
| Q3U5Q7  | <i>Cmpk2</i>     | UMP-CMP           | High   | 27 | 9  | 10  | 9  | 447  | 50    | 7.27  | 168  | 103.3 | 110.4 | 106.6 | 97    | 90.4  | 92.3  |
| O08576  | <i>Rundc3a</i>   | RUN domain-       | High   | 7  | 2  | 3   | 2  | 446  | 50    | 5.5   | 55   | 91.4  | 105.1 | 102.5 | 103.6 | 102.4 | 95.1  |
| Q8BTG3  | <i>Tcp1111</i>   | T-complex         | High   | 9  | 4  | 5   | 4  | 509  | 56.3  | 5.5   | 146  | 98.7  | 98.2  | 94.7  | 99.3  | 107.9 | 101.1 |
| O54781  | <i>Srpk2</i>     | SRSF protein      | High   | 15 | 9  | 11  | 6  | 681  | 76.7  | 4.91  | 73   | 95.6  | 100.1 | 88.8  | 104   | 108.1 | 103.4 |
| Q9JHS3  | <i>Lamtor2</i>   | Ragulator         | High   | 22 | 2  | 2   | 2  | 125  | 13.5  | 5.4   | 38   | 96.7  | 97.4  | 105.7 | 100   | 97.5  | 102.7 |
| P12787  | <i>Cox5a</i>     | Cytochrome c      | High   | 60 | 8  | 20  | 8  | 146  | 16.1  | 6.54  | 404  | 91.3  | 102.8 | 85.2  | 101.6 | 113   | 106.1 |
| Q5SP85  | <i>Ccdc85a</i>   | Coiled-coil       | High   | 6  | 3  | 4   | 3  | 500  | 54.5  | 8     | 119  | 98.3  | 104.5 | 92.5  | 98.5  | 103.8 | 102.3 |
| P36536  | <i>Sar1a</i>     | GTP-binding       | High   | 27 | 5  | 10  | 3  | 198  | 22.4  | 6.93  | 207  | 99.8  | 100.1 | 90    | 98.1  | 111.5 | 100.5 |
| Q3UKJ7  | <i>Smu1</i>      | WD40 repeat-      | High   | 17 | 6  | 6   | 6  | 513  | 57.5  | 7.18  | 86   | 94.4  | 92.1  | 99.1  | 100.6 | 98.6  | 115.3 |
| Q9DB72  | <i>Btbd17</i>    | BTB/POZ           | High   | 13 | 5  | 6   | 5  | 478  | 52.6  | 9.42  | 110  | 86.9  | 104.5 | 84.1  | 114.7 | 104.5 | 105.3 |
| Q9JJE4  | <i>Paqr4</i>     | Progesterin and   | Medium | 3  | 1  | 1   | 1  | 273  | 29.2  | 8.79  | 0    |       |       |       |       |       |       |
| P61957  | <i>Sumo2</i>     | Small ubiquitin-  | High   | 23 | 2  | 4   | 2  | 95   | 10.9  | 5.5   | 82   | 101.8 | 99.8  | 96.3  | 99.2  | 104.1 | 98.8  |
| Q9JM14  | <i>Nt5c</i>      | 5'(3')-           | High   | 49 | 8  | 11  | 8  | 200  | 23.1  | 5.49  | 119  | 98    | 100.6 | 95.5  | 101.6 | 102.6 | 101.6 |
| Q02357  | <i>Ank1</i>      | Ankyrin-1         | High   | 10 | 16 | 18  | 12 | 1862 | 204.1 | 6.55  | 218  | 100.1 | 106.1 | 95.5  | 101.3 | 97.3  | 99.6  |
| Q8CI51  | <i>Pdlim5</i>    | PDZ and LIM       | High   | 10 | 4  | 5   | 4  | 591  | 63.3  | 8.25  | 71   | 103.4 | 104.4 | 108   | 90.8  | 95.9  | 97.5  |
| Q6PAR5  | <i>Gapvd1</i>    | GTPase-           | High   | 12 | 16 | 21  | 16 | 1458 | 162.3 | 5.19  | 212  | 95.6  | 101.3 | 95.8  | 100.7 | 101.2 | 105.3 |
| Q8K358  | <i>Pigu</i>      | Phosphatidylinos  | High   | 6  | 2  | 2   | 2  | 434  | 49.8  | 7.72  | 46   | 95.8  | 94.5  | 103.8 | 105.1 | 101.7 | 99.1  |
| Q0KL02  | <i>Trio</i>      | Triple functional | High   | 12 | 35 | 44  | 26 | 3102 | 347.6 | 6.35  | 681  | 97.2  | 96.7  | 93.9  | 103.7 | 104.3 | 104.3 |
| Q8R3S6  | <i>Exoc1</i>     | Exocyst complex   | High   | 15 | 12 | 13  | 12 | 894  | 101.8 | 6.52  | 185  | 96.9  | 98    | 102.3 | 102.8 | 101.2 | 98.7  |
| Q80VP1  | <i>Epn1</i>      | Epsin-1 OS=Mus    | High   | 26 | 11 | 17  | 11 | 575  | 60.2  | 4.81  | 295  | 96.6  | 102.8 | 91.2  | 105.6 | 101.1 | 102.7 |
| Q9Z320  | <i>Krt27</i>     | Keratin, type I   | Medium | 2  | 1  | 1   | 1  | 448  | 49.1  | 5.05  | 19   | 102.2 | 128.4 | 91.8  | 70    | 88.9  | 118.7 |
| Q80UY2  | <i>Kcmf1</i>     | E3 ubiquitin-     | High   | 7  | 2  | 2   | 2  | 381  | 41.8  | 5.76  | 57   | 84.9  | 89.9  | 86.1  | 114.7 | 91.3  | 132.9 |
| Q80ZW2  | <i>Them6</i>     | Protein THEM6     | High   | 39 | 7  | 8   | 7  | 207  | 23.8  | 9.11  | 114  | 98.6  | 102.7 | 94.1  | 99.5  | 101.7 | 103.3 |
| Q9DB50  | <i>Ap1s2</i>     | AP-1 complex      | High   | 23 | 4  | 5   | 2  | 160  | 18.9  | 5.48  | 128  | 101.6 | 96.5  | 92.8  | 102.9 | 101.2 | 105.1 |
| P18760  | <i>Cfl1</i>      | Cofilin-1         | High   | 74 | 16 | 63  | 14 | 166  | 18.5  | 8.09  | 1260 | 101.9 | 101.4 | 102.6 | 99.4  | 98.3  | 96.3  |
| Q60931  | <i>Vdac3</i>     | Voltage-          | High   | 52 | 12 | 52  | 11 | 283  | 30.7  | 8.79  | 1081 | 96.8  | 102.2 | 94.4  | 101.9 | 102.2 | 102.5 |
| P97382  | <i>Kcnab3</i>    | Voltage-gated     | Medium | 8  | 1  | 1   | 1  | 249  | 27.7  | 7.39  | 0    | 96.1  | 106.3 | 83.2  | 109.6 | 100.9 | 103.8 |
| P97825  | <i>Jpt1</i>      | Jupiter           | High   | 42 | 4  | 9   | 4  | 154  | 16.1  | 5.31  | 101  | 93.6  | 101.6 | 91.1  | 106.8 | 103.1 | 103.8 |
| Q8R0J7  | <i>Vps37b</i>    | Vacuolar protein  | High   | 29 | 5  | 5   | 5  | 285  | 31    | 7.05  | 89   | 101.3 | 92    | 96.3  | 102.3 | 105.7 | 102.4 |
| O55102  | <i>Bloc1s1</i>   | Biogenesis of     | High   | 9  | 1  | 1   | 1  | 125  | 14.3  | 8.15  | 49   | 94.2  | 105.9 | 102.7 | 89.3  | 104.8 | 103.1 |
| Q9D4C9  | <i>Clvs1</i>     | Clavesin-1        | High   | 23 | 7  | 9   | 5  | 354  | 40.6  | 6.73  | 125  | 94    | 99.7  | 95    | 99.9  | 102.9 | 108.5 |
| Q8K0E8  | <i>Fgb</i>       | Fibrinogen beta   | High   | 45 | 21 | 32  | 20 | 481  | 54.7  | 7.08  | 357  | 174.4 | 67.2  | 194.1 | 54    | 53.3  | 57.1  |
| A2ARV4  | <i>Lrp2</i>      | Low-density       | Medium | 0  | 1  | 1   | 1  | 4660 | 518.9 | 5.15  | 0    | 93.2  | 122.4 | 89.3  | 107   | 98.3  | 89.7  |
| P26151  | <i>Fcgr1</i>     | High affinity     | High   | 7  | 2  | 2   | 2  | 404  | 44.9  | 6.09  | 30   | 119.5 | 115.8 | 118.3 | 87.5  | 79.5  | 79.4  |
| Q60759  | <i>Gcdh</i>      | Glutaryl-CoA      | High   | 14 | 4  | 4   | 4  | 438  | 48.6  | 8.73  | 62   | 97.8  | 101.3 | 97.8  | 98.8  | 99.4  | 104.9 |
| O88444  | <i>Adcy1</i>     | Adenylate         | High   | 4  | 4  | 5   | 4  | 1118 | 123.3 | 8.47  | 83   | 94.1  | 92.1  | 114.3 | 105.1 | 95.4  | 99    |
| Q9CYT6  | <i>Cap2</i>      | Adenylyl          | High   | 42 | 20 | 44  | 19 | 476  | 52.8  | 6.43  | 915  | 96.6  | 99.1  | 91.5  | 106.3 | 103.1 | 103.5 |
| O55234  | <i>Psmb5</i>     | Proteasome        | High   | 34 | 9  | 16  | 9  | 264  | 28.5  | 7.02  | 297  | 97.5  | 96.5  | 95.3  | 102.4 | 104.8 | 103.5 |
| Q9CR67  | <i>Tmem33</i>    | Transmembrane     | High   | 11 | 3  | 3   | 3  | 247  | 28    | 9.66  | 55   | 102.9 | 107   | 90.8  | 98.6  | 103.3 | 97.4  |
| Q80Y55  | <i>Bsdc1</i>     | BSD domain-       | High   | 11 | 4  | 4   | 4  | 427  | 46.9  | 4.4   | 63   | 97.4  | 99.4  | 96.6  | 99.8  | 102.8 | 104   |
| Q9D154  | <i>Serpinb1a</i> | Leukocyte         | High   | 24 | 8  | 10  | 8  | 379  | 42.5  | 6.21  | 214  | 103.3 | 112.4 | 129.2 | 85.7  | 83.8  | 85.6  |
| P35293  | <i>Rab18</i>     | Ras-related       | High   | 58 | 9  | 17  | 9  | 206  | 23    | 5.36  | 355  | 96.9  | 105.5 | 99    | 100.3 | 98.7  | 99.5  |
| Q8WUR0  |                  | Protein C19orf12  | Medium | 6  | 1  | 1   | 1  | 141  | 15.1  | 7.18  | 13   | 93.3  | 103.1 | 103.7 | 105.3 | 92    | 102.6 |
| Q61151  | <i>Ppp2r5e</i>   | Serine/threonine  | High   | 27 | 12 | 18  | 9  | 467  | 54.7  | 6.95  | 264  | 95.6  | 100.3 | 90    | 103.3 | 107.5 | 103.3 |
| G5E829  | <i>Atp2b1</i>    | Plasma            | High   | 39 | 42 | 120 | 22 | 1220 | 134.7 | 5.91  | 2400 | 94.2  | 104   | 92    | 105.6 | 103.3 | 100.9 |
| Q9ERU9  | <i>Ranbp2</i>    | E3 SUMO-          | High   | 6  | 15 | 16  | 15 | 3053 | 340.9 | 6.18  | 139  | 98.2  | 99.9  | 100   | 101.8 | 99.1  | 101   |
| Q8BRV5  | <i>Kiaa1671</i>  | Uncharacterized   | High   | 4  | 1  | 2   | 1  | 308  | 34.6  | 6.09  | 21   | 92.3  | 92.1  | 89.7  | 110.8 | 105.7 | 109.4 |
| Q91X51  | <i>Gorasp1</i>   | Golgi             | High   | 5  | 1  | 1   | 1  | 446  | 46.9  | 4.65  | 23   | 88.2  | 96.2  | 94.4  | 103.8 | 105   | 112.5 |
| Q9D8Z2  | <i>Triap1</i>    | TP53-regulated    | High   | 43 | 3  | 3   | 3  | 76   | 8.8   | 5.48  | 21   | 98.2  | 107.5 | 95.4  | 103.3 | 94.6  | 101.1 |
| P33622  | <i>Apoc3</i>     | Apolipoprotein    | High   | 38 | 2  | 2   | 2  | 99   | 11    | 4.75  | 40   | 128.1 | 78.1  | 159.6 | 68.9  | 77.6  | 87.7  |
| Q6ZQK5  | <i>Acap2</i>     | Arf-GAP with      | High   | 15 | 10 | 13  | 10 | 770  | 87.2  | 6.68  | 259  | 96    | 103.4 | 96.7  | 101.3 | 102.9 | 99.6  |
| Q6PD28  | <i>Ppp2r5b</i>   | Serine/threonine  | High   | 18 | 8  | 12  | 6  | 497  | 57.3  | 6.84  | 228  | 99.3  | 96.8  | 99.7  | 100.9 | 103.2 | 100.1 |
| Q61923  | <i>Kcna6</i>     | Potassium         | High   | 4  | 2  | 2   | 1  | 529  | 58.6  | 5.03  | 17   |       |       |       |       |       |       |
| Q9DCB4  | <i>Arpp21</i>    | cAMP-regulated    | High   | 7  | 3  | 3   | 3  | 807  | 88.5  | 7.39  | 38   | 143.6 | 67.1  | 186   | 59.5  | 77    | 66.8  |
| Q9CQF4  | <i>Mtres1</i>    | Mitochondrial     | High   | 12 | 2  | 3   | 2  | 240  | 27.8  | 9.36  | 46   | 93.3  | 104.6 | 86.8  | 106.9 | 108   | 100.4 |
| Q99KC8  | <i>Vwa5a</i>     | von Willebrand    | High   | 17 | 11 | 15  | 11 | 793  | 87.1  | 6.58  | 116  | 110.5 | 106.2 | 124.1 | 84.3  | 85.2  | 89.6  |
| Q7TJSJ2 | <i>Map6</i>      | Microtubule-      | High   | 58 | 45 | 88  | 45 | 906  | 96.4  | 9.5   | 1396 | 95.3  | 97.6  | 89.7  | 108.5 | 107.4 | 101.5 |
| Q60770  | <i>Stxbp3</i>    | Syntaxin-binding  | High   | 13 | 7  | 7   | 7  | 592  | 67.9  | 8.02  | 84   | 108   | 108.7 | 114.8 | 89.7  | 89    | 89.7  |
| P28663  | <i>Napb</i>      | Beta-soluble      | High   | 80 | 22 | 74  | 18 | 298  | 33.5  | 5.47  | 1595 | 97.6  | 98.6  | 96.5  | 100.5 | 105.7 | 101.2 |
| Q8K1Z0  | <i>Coq9</i>      | Ubiquinone        | High   | 15 | 4  | 9   | 4  | 313  | 35.1  | 5.92  | 195  | 99.4  | 106.1 | 96.5  | 101.5 | 99.7  | 96.8  |
| Q8BHC4  | <i>Dcakd</i>     | Dephospho-CoA     | High   | 20 | 6  | 7   | 6  | 231  | 26.5  | 9.58  | 62   | 99.8  | 97.7  | 99.7  | 99.6  | 96.8  | 106.4 |
| Q8C522  | <i>Endod1</i>    | Endonuclease      | High   | 19 | 6  | 9   | 6  | 501  | 55.2  | 6.16  | 212  | 98.3  | 99.8  | 99.5  | 99.7  | 95.5  | 107.1 |
| P47708  | <i>Rph3a</i>     | Rabphilin-3A      | High   | 31 | 16 | 24  | 16 | 681  | 75.4  | 8.27  | 558  | 87.1  | 98.3  | 80.4  | 114.2 | 111.5 | 108.4 |
| Q3V1L4  | <i>Nt5c2</i>     | Cytosolic purine  | Medium | 3  | 1  | 1   | 1  | 560  | 64.8  | 6.21  | 23   | 84.3  | 107.9 | 131.8 | 70    | 109.4 | 96.6  |

|        |                 |                  |        |    |    |     |    |      |       |      |      |       |       |       |       |       |       |
|--------|-----------------|------------------|--------|----|----|-----|----|------|-------|------|------|-------|-------|-------|-------|-------|-------|
| Q9WV85 | <i>Nme3</i>     | Nucleoside       | High   | 23 | 3  | 4   | 3  | 169  | 19.1  | 6.68 | 75   | 94.3  | 103.7 | 92.6  | 107.8 | 97.1  | 104.6 |
| Q6PGG6 | <i>Gnl3l</i>    | Guanine          | Medium | 2  | 1  | 1   | 1  | 577  | 65.2  | 8.6  | 0    |       |       |       |       |       |       |
| Q99P58 | <i>Rab27b</i>   | Ras-related      | High   | 33 | 6  | 8   | 6  | 218  | 24.5  | 5.54 | 141  | 99.9  | 95.7  | 108.8 | 92.4  | 100.4 | 102.8 |
| Q80XU3 | <i>Nucks1</i>   | Nuclear          | High   | 18 | 4  | 6   | 4  | 234  | 26.3  | 5.14 | 62   | 93.5  | 94.5  | 101.6 | 104.5 | 103.9 | 102.1 |
| Q8K4F5 | <i>Abhd11</i>   | Protein ABHD11   | High   | 7  | 2  | 2   | 2  | 307  | 33.5  | 9.61 | 36   | 103.6 | 100   | 108.8 | 94.9  | 110.4 | 82.4  |
| Q6NZJ6 | <i>Eif4g1</i>   | Eukaryotic       | High   | 18 | 25 | 31  | 22 | 1600 | 176   | 5.4  | 395  | 101.7 | 98.7  | 102   | 102.6 | 95.9  | 99.1  |
| Q99KQ4 | <i>Nampt</i>    | Nicotinamide     | High   | 41 | 15 | 17  | 15 | 491  | 55.4  | 7.15 | 306  | 101   | 101.7 | 110.6 | 93.1  | 97.3  | 96.2  |
| P59764 | <i>Dock4</i>    | Dedicator of     | High   | 8  | 15 | 16  | 15 | 1978 | 226.4 | 7.65 | 142  | 100.7 | 97.7  | 106.3 | 97    | 100.7 | 97.6  |
| Q9D0I8 | <i>Mrt4</i>     | mRNA turnover    | High   | 10 | 2  | 2   | 2  | 239  | 27.5  | 8.54 | 52   | 99.7  | 104   | 99.1  | 96.8  | 98.5  | 101.8 |
| Q8BV49 | <i>Pyhin1</i>   | Pyrim and HIN    | Low    | 2  | 1  | 1   | 1  | 420  | 46.9  | 9.45 | 20   |       |       |       |       |       |       |
| P97494 | <i>Gclc</i>     | Glutamate--      | High   | 19 | 10 | 11  | 10 | 637  | 72.5  | 5.9  | 114  | 95    | 102.2 | 103   | 102   | 96.4  | 101.3 |
| Q9R0K7 | <i>Atp2b2</i>   | Plasma           | High   | 43 | 45 | 137 | 30 | 1198 | 132.5 | 5.96 | 2694 | 93    | 106.4 | 78.8  | 110.7 | 105.9 | 105.1 |
| Q99M80 | <i>Ptpst</i>    | Receptor-type    | High   | 3  | 3  | 4   | 3  | 1454 | 162.9 | 6.84 | 82   | 96.8  | 98.1  | 92.3  | 107.3 | 98.6  | 107   |
| Q8R2Y8 | <i>Pthr2</i>    | Peptidyl-tRNA    | High   | 26 | 3  | 4   | 3  | 181  | 19.5  | 7.42 | 111  | 102.9 | 107.5 | 99.8  | 91.2  | 99.7  | 98.9  |
| Q9WUC3 | <i>Ly6h</i>     | Lymphocyte       | High   | 22 | 3  | 4   | 3  | 139  | 14.7  | 7.53 | 40   | 82.8  | 74.3  | 138.6 | 108.3 | 90.3  | 105.6 |
| Q68FD9 | <i>Kiaa1549</i> | UPF0606 protein  | High   | 6  | 12 | 14  | 12 | 1940 | 209.1 | 6.1  | 271  | 88.3  | 94.6  | 88.1  | 123.5 | 100.9 | 104.7 |
| P02535 | <i>Krt10</i>    | Keratin, type I  | High   | 6  | 3  | 7   | 2  | 570  | 57.7  | 5.11 | 190  | 89.5  | 123.9 | 88    | 132.7 | 81.8  | 84.1  |
| Q80U87 | <i>Usp8</i>     | Ubiquitin        | High   | 6  | 5  | 5   | 5  | 1080 | 122.5 | 8.47 | 59   | 96.6  | 99.1  | 100.3 | 101.4 | 99.3  | 103.3 |
| Q9D0W5 | <i>Ppil1</i>    | Peptidyl-prolyl  | High   | 29 | 4  | 4   | 4  | 166  | 18.2  | 7.99 | 75   | 99.3  | 103.2 | 96.8  | 98.8  | 103.3 | 98.6  |
| Q9D1L9 | <i>Lamtor5</i>  | Ragulator        | High   | 11 | 1  | 2   | 1  | 91   | 9.6   | 4.87 | 28   | 107.5 | 95.2  | 102.5 | 97.5  | 100.5 | 96.7  |
| P18525 |                 | Ig heavy chain V | High   | 14 | 1  | 1   | 1  | 117  | 12.9  | 8.88 | 36   |       |       |       |       |       |       |
| Q9CWW6 | <i>Pin4</i>     | Peptidyl-prolyl  | Medium | 9  | 1  | 1   | 1  | 131  | 13.8  | 9.77 | 23   | 96.7  | 104.8 | 100.7 | 96.1  | 102.8 | 98.9  |
| P15209 | <i>Ntrk2</i>    | BDNF/NT-3        | High   | 14 | 9  | 16  | 5  | 821  | 92.1  | 6.55 | 216  | 92.2  | 95.7  | 96.5  | 101.4 | 100.9 | 113.2 |
| Q8C827 | <i>Zfp62</i>    | Zinc finger      | Medium | 3  | 1  | 2   | 1  | 914  | 104.7 | 8.85 | 0    |       |       |       |       |       |       |
| O89112 | <i>Lancl1</i>   | Glutathione S-   | High   | 22 | 7  | 12  | 7  | 399  | 45.3  | 7.77 | 141  | 97.5  | 103.3 | 93    | 101.6 | 102.8 | 101.8 |
| Q9JKX6 | <i>Nudt5</i>    | ADP-sugar        | High   | 27 | 5  | 5   | 5  | 218  | 24    | 5.48 | 72   | 102.4 | 109.1 | 104.5 | 94.1  | 93.7  | 96.2  |
| O55029 | <i>Copb2</i>    | Coatomer         | High   | 25 | 18 | 23  | 18 | 905  | 102.4 | 5.3  | 365  | 102.7 | 100.2 | 104.2 | 93.8  | 98    | 101.1 |
| O35343 | <i>Kpna4</i>    | Importin subunit | High   | 26 | 8  | 10  | 5  | 521  | 57.9  | 4.94 | 128  | 98.3  | 92.6  | 104.1 | 100.9 | 95.7  | 108.4 |
| P24452 | <i>Capg</i>     | Macrophage-      | High   | 8  | 2  | 2   | 2  | 352  | 39.2  | 7.2  | 37   |       |       |       |       |       |       |
| P51163 | <i>Uros</i>     | Uroporphyrinoge  | High   | 28 | 4  | 4   | 4  | 265  | 28.5  | 6.54 | 114  | 91.6  | 92.2  | 96.2  | 109.9 | 109.4 | 100.7 |
| Q3TVA9 | <i>Ccdc136</i>  | Coiled-coil      | High   | 9  | 8  | 9   | 8  | 1136 | 131.8 | 4.84 | 160  | 98.6  | 90.9  | 88.3  | 107.7 | 96.7  | 117.9 |
| Q8BFQ4 | <i>Wdr82</i>    | WD repeat-       | High   | 9  | 2  | 2   | 2  | 313  | 35.1  | 7.69 | 35   | 103.5 | 91.5  | 108.8 | 97.3  | 98.8  | 100.3 |
| Q8R4V2 | <i>Dusp15</i>   | Dual specificity | Medium | 6  | 1  | 1   | 1  | 235  | 26.2  | 9.26 | 34   | 87.6  | 103.7 | 111.2 | 94.2  | 110.7 | 92.7  |
| Q6GQT1 | <i>A2m</i>      | Alpha-2-         | High   | 4  | 4  | 4   | 4  | 1474 | 164.2 | 6.61 | 28   | 142.2 | 106.6 | 146.3 | 67.7  | 70.4  | 66.9  |
| O35350 | <i>Capn1</i>    | Calpain-1        | High   | 13 | 9  | 11  | 9  | 713  | 82.1  | 5.87 | 84   | 99.2  | 100.5 | 107.2 | 91.8  | 93.7  | 107.5 |
| Q9D1P0 | <i>Mrp13</i>    | 39S ribosomal    | Medium | 8  | 1  | 1   | 1  | 178  | 20.7  | 9.35 | 16   | 94.1  | 92    | 90.6  | 99.4  | 115.3 | 108.6 |
| P97355 | <i>Sms</i>      | Spermine         | High   | 34 | 9  | 11  | 9  | 366  | 41.3  | 5.06 | 297  | 96.9  | 94.2  | 96.1  | 104.9 | 100.1 | 107.8 |
| Q99J99 | <i>Mpst</i>     | 3-               | High   | 40 | 9  | 12  | 9  | 297  | 33.1  | 6.47 | 210  | 96    | 98    | 95.6  | 100.3 | 107   | 103.1 |
| Q3UJP5 |                 | Protein C8orf37  | High   | 11 | 2  | 2   | 2  | 209  | 23.8  | 6.86 | 67   | 98.8  | 102.1 | 94.7  | 101.1 | 100.6 | 102.8 |
| Q64735 | <i>Cr1l</i>     | Complement       | High   | 5  | 2  | 3   | 2  | 483  | 53.7  | 6.65 | 24   | 101   | 101.9 | 111.9 | 98.7  | 85.3  | 101.2 |
| Q8VEH6 | <i>Cbwd1</i>    | COBW domain-     | High   | 3  | 1  | 1   | 1  | 393  | 43.7  | 4.89 | 23   |       |       |       |       |       |       |
| O35215 | <i>Ddt</i>      | D-dopachrome     | High   | 64 | 6  | 14  | 6  | 118  | 13.1  | 6.54 | 259  | 101.7 | 105.2 | 99.2  | 98    | 94.7  | 101.3 |
| Q9CR29 | <i>Ccdc43</i>   | Coiled-coil      | High   | 21 | 3  | 4   | 3  | 222  | 25    | 4.97 | 72   | 99.5  | 94.6  | 97.4  | 99.3  | 105.1 | 104.1 |
| A2RSQ0 | <i>Dennd5b</i>  | DENN domain-     | High   | 2  | 3  | 3   | 3  | 1274 | 144.5 | 6.68 | 20   | 93.4  | 87.9  | 97.8  | 98.8  | 112.6 | 109.4 |
| P05532 | <i>Kit</i>      | Mast/stem cell   | High   | 4  | 4  | 4   | 3  | 979  | 109.3 | 7.21 | 74   | 103.1 | 83.5  | 112.1 | 93.6  | 104.3 | 103.3 |
| Q91YJ5 | <i>Mtif2</i>    | Translational    | High   | 6  | 3  | 3   | 3  | 727  | 81.2  | 7.24 | 28   | 71.6  | 95.2  | 95.6  | 102.9 | 100.8 | 133.9 |
| Q8CDN6 | <i>Txnl1</i>    | Thioredoxin-like | High   | 45 | 8  | 15  | 8  | 289  | 32.2  | 4.96 | 293  | 100.2 | 95.8  | 102.5 | 98.7  | 101.4 | 101.4 |
| Q80TK0 | <i>Kiaa1107</i> | AP2-interacting  | High   | 7  | 6  | 8   | 6  | 1239 | 134   | 6.61 | 120  | 93.9  | 103.8 | 82.3  | 108.5 | 104.6 | 106.9 |
| P05063 | <i>Aldoc</i>    | Fructose-        | High   | 71 | 23 | 130 | 17 | 363  | 39.4  | 7.12 | 2979 | 97.1  | 105.9 | 88.9  | 102.2 | 104.1 | 101.7 |
| Q61165 | <i>Slc9a1</i>   | Sodium/hydroge   | High   | 7  | 4  | 5   | 4  | 820  | 91.4  | 7.12 | 90   | 90.4  | 104.4 | 96.7  | 102.6 | 102.7 | 103.3 |
| Q99KK2 | <i>Cmas</i>     | N-               | High   | 34 | 13 | 14  | 13 | 432  | 48    | 8.1  | 211  | 95.8  | 93.2  | 96.7  | 105.5 | 106.9 | 102   |
| Q8BYN3 | <i>Itpk1</i>    | Inositol-        | High   | 12 | 3  | 3   | 3  | 419  | 46.1  | 6.29 | 22   | 100.6 | 100.1 | 91    | 97.6  | 110.9 | 99.8  |
| Q61142 | <i>Spin1</i>    | Spindlin-1       | Medium | 4  | 1  | 1   | 1  | 262  | 29.6  | 6.96 | 18   | 98.9  | 102.9 | 94.4  | 99.8  | 101.9 | 102.1 |
| Q8BGT8 | <i>Phyhlpl</i>  | Phytanoyl-CoA    | High   | 44 | 15 | 21  | 13 | 375  | 42.3  | 6.35 | 275  | 100.5 | 96.6  | 101.8 | 96.8  | 102   | 102.3 |
| P21279 | <i>Gnaq</i>     | Guanine          | High   | 51 | 16 | 30  | 12 | 359  | 42.1  | 5.68 | 540  | 96.5  | 95.7  | 98.9  | 103.1 | 103.7 | 102.2 |
| Q9D868 | <i>Ppnh</i>     | Peptidyl-prolyl  | High   | 14 | 3  | 3   | 3  | 188  | 20.5  | 8.09 | 37   | 95.8  | 98.6  | 99.5  | 106.2 | 96.9  | 103.1 |
| P00520 | <i>Abi1</i>     | Tyrosine-protein | Medium | 2  | 1  | 1   | 1  | 1123 | 122.6 | 8.65 | 0    | 91.3  | 90.5  | 96.5  | 120.3 | 96.9  | 104.5 |
| Q3U213 | <i>Serac1</i>   | Protein SERAC1   | High   | 2  | 1  | 1   | 1  | 654  | 73.9  | 8.18 | 36   | 101.4 | 104.3 | 91.3  | 107.1 | 97.3  | 98.6  |
| O35988 | <i>Sdc4</i>     | Syndecan-4       | High   | 12 | 2  | 4   | 2  | 198  | 21.5  | 4.41 | 112  | 112.1 | 103.6 | 119.2 | 91.2  | 83.5  | 90.4  |
| Q63959 | <i>Kcnc3</i>    | Potassium        | High   | 3  | 2  | 2   | 2  | 769  | 81.9  | 6.98 | 22   | 93.8  | 114.1 | 81.4  | 114.2 | 103.6 | 92.8  |
| Q9WTS4 | <i>Tenn1</i>    | Teneurin-1       | High   | 1  | 2  | 2   | 1  | 2731 | 305.6 | 6.37 | 38   | 89.7  | 111.5 | 89    | 91.7  | 98.1  | 120   |
| Q9CSH3 | <i>Dis3</i>     | Exosome          | High   | 3  | 2  | 2   | 2  | 958  | 108.8 | 7.53 | 31   | 108.4 | 93.3  | 97.9  | 98.5  | 101.5 | 100.5 |
| Q6ZPY2 | <i>Smg5</i>     | Protein SMG5     | High   | 3  | 2  | 4   | 2  | 1017 | 114   | 6    | 81   | 102.8 | 98    | 95.5  | 101.6 | 100.9 | 101.2 |
| Q62186 | <i>Ssr4</i>     | Translocon-      | High   | 25 | 3  | 4   | 3  | 172  | 18.9  | 5.78 | 150  | 108   | 101.1 | 114.8 | 89.9  | 93.3  | 92.9  |
| Q6ZQM8 | <i>Ugt1a7</i>   | UDP-             | High   | 4  | 2  | 2   | 1  | 531  | 59.7  | 8.35 | 0    | 106.5 | 93.9  | 105.2 | 94.3  | 97.5  | 102.7 |
| Q9QXE5 | <i>Prss16</i>   | Thymus-specific  | Low    | 2  | 1  | 1   | 1  | 509  | 54.5  | 7.46 | 0    |       |       |       |       |       |       |
| Q8CH25 | <i>Sltm</i>     | SAFB-like        | High   | 5  | 4  | 5   | 4  | 1031 | 116.9 | 7.72 | 77   | 104.9 | 94.1  | 88.8  | 110.5 | 99.6  | 102   |
| Q9CS84 | <i>Nrxn1</i>    | Neurexin-1       | High   | 25 | 29 | 43  | 23 | 1514 | 166.1 | 6.09 | 692  | 98.7  | 97.3  | 92.4  | 99.6  | 100.7 | 111.5 |

|        |                 |                   |        |    |     |     |     |      |       |       |      |       |       |       |       |       |       |
|--------|-----------------|-------------------|--------|----|-----|-----|-----|------|-------|-------|------|-------|-------|-------|-------|-------|-------|
| Q3UDR8 | <i>Yipf3</i>    | Protein YIPF3     | Low    | 3  | 1   | 1   | 1   | 347  | 38    | 5.94  | 0    |       |       |       |       |       |       |
| Q3UH60 | <i>Dip2b</i>    | Disco-interacting | High   | 18 | 21  | 25  | 21  | 1574 | 171   | 8.09  | 258  | 94.3  | 100.1 | 95.8  | 106   | 102.9 | 100.8 |
| Q8BTZ4 | <i>Anapc5</i>   | Anaphase-         | High   | 9  | 5   | 5   | 5   | 740  | 83    | 6.71  | 64   | 102.7 | 97.9  | 96.5  | 98.8  | 99.1  | 105   |
| Q9Z1Z0 | <i>Uso1</i>     | General           | High   | 26 | 21  | 28  | 21  | 959  | 106.9 | 4.93  | 485  | 100.1 | 99.8  | 103   | 99.9  | 98.9  | 98.2  |
| Q9QUR6 | <i>Prep</i>     | Prolyl            | High   | 45 | 25  | 34  | 25  | 710  | 80.7  | 5.73  | 537  | 96.2  | 98.1  | 97.5  | 102   | 100.4 | 105.8 |
| Q8K021 | <i>Scamp1</i>   | Secretory         | High   | 31 | 8   | 13  | 8   | 338  | 38    | 7.71  | 254  | 94.7  | 95.5  | 102.7 | 100.7 | 105.4 | 100.9 |
| Q9ERS2 | <i>Ndufa13</i>  | NADH              | High   | 60 | 8   | 27  | 8   | 144  | 16.8  | 9.48  | 460  | 95.2  | 103   | 89.3  | 105.7 | 102.6 | 104.3 |
| Q8BTH8 | <i>Csnk1g1</i>  | Casein kinase I   | High   | 12 | 6   | 8   | 2   | 459  | 52.7  | 9.01  | 73   | 94.9  | 95.7  | 93.8  | 102.8 | 108.3 | 104.5 |
| O08917 | <i>Flot1</i>    | Flotillin-1       | High   | 54 | 19  | 36  | 19  | 428  | 47.5  | 7.15  | 527  | 101.4 | 92    | 104.5 | 99    | 101.3 | 101.8 |
| Q8CAY6 | <i>Acat2</i>    | Acetyl-CoA        | High   | 31 | 9   | 11  | 9   | 397  | 41.3  | 7.5   | 189  | 98.6  | 103.5 | 94.4  | 103.7 | 101.6 | 98.2  |
| P51885 | <i>Lum</i>      | Lumican           | Medium | 3  | 1   | 1   | 1   | 338  | 38.2  | 6.43  | 0    | 131.5 | 86.3  | 163.9 | 71.2  | 75.2  | 71.8  |
| P15388 | <i>Kcnc1</i>    | Potassium         | High   | 4  | 2   | 3   | 2   | 511  | 57.9  | 6.58  | 32   | 106.6 | 99.4  | 117.4 | 96.4  | 86.5  | 93.6  |
| P28867 | <i>Prkcd</i>    | Protein kinase C  | High   | 24 | 16  | 26  | 15  | 674  | 77.5  | 7.39  | 292  | 92.2  | 108.5 | 94    | 108.5 | 96.4  | 100.4 |
| Q99KD5 | <i>Unc45a</i>   | Protein unc-45    | High   | 3  | 2   | 5   | 2   | 944  | 103.4 | 6.34  | 74   | 100.8 | 99.1  | 99.4  | 104.6 | 95.3  | 100.9 |
| Q9D906 | <i>Atg7</i>     | Ubiquitin-like    | High   | 17 | 11  | 14  | 11  | 698  | 77.5  | 6.4   | 219  | 97    | 101.2 | 95.8  | 101.9 | 98.1  | 106   |
| Q9R0M4 | <i>Podxl</i>    | Podocalyxin       | High   | 9  | 3   | 4   | 3   | 503  | 53.4  | 4.97  | 68   | 108.5 | 100.9 | 108.2 | 88    | 96    | 98.4  |
| P48193 | <i>Epb41</i>    | Protein 4.1       | High   | 11 | 8   | 12  | 5   | 858  | 95.9  | 5.6   | 180  | 98.6  | 99.8  | 96.8  | 103   | 99.1  | 102.7 |
| Q9QXZ0 | <i>Macf1</i>    | Microtubule-actin | High   | 20 | 125 | 155 | 122 | 7354 | 831.4 | 5.43  | 2426 | 100.3 | 100.1 | 99.9  | 98.7  | 99.9  | 101.1 |
| Q8CE90 | <i>Map2k7</i>   | Dual specificity  | High   | 5  | 3   | 3   | 3   | 535  | 59.3  | 9.11  | 23   | 99.7  | 105.1 | 98.7  | 103.7 | 95.6  | 97.3  |
| P39688 | <i>Fyn</i>      | Tyrosine-protein  | High   | 15 | 8   | 10  | 3   | 537  | 60.6  | 6.67  | 78   | 95.6  | 95.2  | 106.8 | 101.1 | 93.6  | 107.8 |
| Q61823 | <i>Pdcd4</i>    | Programmed cell   | High   | 5  | 2   | 2   | 2   | 469  | 51.7  | 5.16  | 35   | 100.9 | 104   | 107.1 | 101.9 | 93.9  | 92.2  |
| Q68EF6 | <i>Begain</i>   | Brain-enriched    | High   | 8  | 4   | 4   | 4   | 600  | 65.3  | 5.87  | 30   | 94.9  | 94.3  | 92.5  | 105.7 | 117.8 | 94.9  |
| Q60930 | <i>Vdac2</i>    | Voltage-          | High   | 65 | 14  | 46  | 14  | 295  | 31.7  | 7.49  | 918  | 98.6  | 104.7 | 93.5  | 103.2 | 100.6 | 99.4  |
| Q61411 | <i>Hras</i>     | GTPase HRas       | High   | 66 | 8   | 18  | 2   | 189  | 21.3  | 5.31  | 450  | 90.9  | 96.4  | 87.9  | 109.9 | 111.4 | 103.5 |
| Q8R4C2 | <i>Rufy2</i>    | RUN and FYVE      | High   | 7  | 5   | 6   | 4   | 606  | 70    | 5.83  | 87   | 91.6  | 89    | 74.2  | 91.4  | 96    | 157.9 |
| Q8R4G6 | <i>Mgat5</i>    | Alpha-1,6-        | Medium | 1  | 1   | 1   | 1   | 740  | 84.5  | 8.19  | 18   | 97.3  | 94.3  | 114.2 | 102.2 | 101.8 | 90.1  |
| Q9JLR9 | <i>Higd1a</i>   | HIG1 domain       | High   | 19 | 1   | 1   | 1   | 95   | 10.4  | 9.79  | 45   | 92.3  | 94.2  | 111   | 117.6 | 83.6  | 101.4 |
| P70288 | <i>Hdac2</i>    | Histone           | High   | 17 | 6   | 6   | 3   | 488  | 55.3  | 5.91  | 66   | 100.3 | 94    | 92.4  | 96.4  | 106.3 | 110.6 |
| Q9DCB8 | <i>Isca2</i>    | Iron-sulfur       | High   | 23 | 3   | 5   | 3   | 154  | 16.7  | 5.6   | 95   | 100.8 | 96.8  | 96.8  | 102.7 | 95.9  | 107.1 |
| Q9CR61 | <i>Ndufb7</i>   | NADH              | High   | 56 | 7   | 28  | 7   | 137  | 16.3  | 8.18  | 302  | 95.6  | 102.6 | 95.9  | 103.3 | 96.9  | 105.8 |
| Q921W0 | <i>Chmp1a</i>   | Charged           | High   | 13 | 3   | 4   | 3   | 196  | 21.6  | 8.06  | 78   | 102.7 | 100.1 | 108.7 | 94.5  | 97.8  | 96.2  |
| Q9DB15 | <i>Mrp12</i>    | 39S ribosomal     | High   | 25 | 5   | 9   | 5   | 201  | 21.7  | 9.29  | 183  | 99.8  | 94.5  | 95    | 97.4  | 99.7  | 113.6 |
| Q8C7R4 | <i>Uba6</i>     | Ubiquitin-like    | High   | 13 | 12  | 17  | 12  | 1053 | 117.9 | 6.11  | 210  | 96.4  | 100.6 | 97    | 105.1 | 100.9 | 100   |
| Q9ER00 | <i>Stx12</i>    | Syntaxin-12       | High   | 41 | 9   | 17  | 9   | 274  | 31.2  | 5.44  | 395  | 98.5  | 96    | 99.5  | 98.7  | 105.7 | 101.5 |
| Q3U186 | <i>Rars2</i>    | Probable          | High   | 19 | 9   | 11  | 9   | 578  | 65.3  | 8.02  | 186  | 95.7  | 98.8  | 101.1 | 100.2 | 102   | 102.2 |
| Q61527 | <i>ErbB4</i>    | Receptor          | High   | 4  | 4   | 5   | 3   | 1308 | 146.8 | 6.38  | 32   | 99.2  | 101.8 | 99.3  | 100.8 | 94.6  | 104.2 |
| Q8R1Q8 | <i>Dync1li1</i> | Cytoplasmic       | High   | 39 | 17  | 30  | 17  | 523  | 56.6  | 6.42  | 438  | 98    | 100.7 | 95.7  | 102.4 | 101.5 | 101.7 |
| O08800 | <i>Serpinb8</i> | Serpin B8         | High   | 4  | 1   | 1   | 1   | 374  | 42.1  | 6.46  | 62   | 87    | 117.2 | 91.4  | 121.7 | 86.7  | 96    |
| Q6PGF7 | <i>Exoc8</i>    | Exocyst complex   | High   | 32 | 19  | 25  | 19  | 716  | 81    | 5.4   | 527  | 95.7  | 98.7  | 94.7  | 103.5 | 101.2 | 106.3 |
| A2AG50 | <i>Map7d2</i>   | MAP7 domain-      | High   | 17 | 14  | 18  | 13  | 781  | 86    | 8.81  | 130  | 90.4  | 98.5  | 96.5  | 107.4 | 102.7 | 104.5 |
| P63250 | <i>Kcnj3</i>    | G protein-        | Medium | 3  | 1   | 1   | 1   | 501  | 56.5  | 8.37  | 26   | 78.3  | 103.2 | 89.7  | 107.4 | 116.5 | 105   |
| Q6PD21 | <i>Shb</i>      | SH2 domain-       | Medium | 3  | 1   | 1   | 1   | 503  | 54.7  | 8.78  | 17   |       |       |       |       |       |       |
| Q8K012 | <i>Fnbp11</i>   | Formin-binding    | High   | 9  | 5   | 7   | 5   | 605  | 69.8  | 6.64  | 125  | 97.3  | 95.9  | 94.8  | 100.5 | 106.7 | 104.8 |
| Q6P6M7 | <i>Sepsecs</i>  | O-phosphoseryl-   | High   | 3  | 2   | 5   | 2   | 504  | 55.3  | 8.06  | 33   | 101.6 | 111.1 | 86.7  | 108.6 | 96.8  | 95.2  |
| Q8VHI3 | <i>Pofut2</i>   | GDP-fucose        | Medium | 2  | 1   | 1   | 1   | 429  | 49.4  | 6.48  | 0    |       |       |       |       |       |       |
| P83877 | <i>Txn14a</i>   | Thioredoxin-like  | High   | 8  | 1   | 1   | 1   | 142  | 16.8  | 5.85  | 31   | 99.8  | 99.9  | 101   | 104.9 | 93.3  | 101.2 |
| Q69ZL1 | <i>Fgd6</i>     | FYVE, RhoGEF      | Low    | 1  | 1   | 1   | 1   | 1399 | 155.1 | 7.87  | 0    | 83.7  | 99.7  | 82.1  | 108   | 108.1 | 118.5 |
| Q9JL26 | <i>Fmn1</i>     | Formin-like       | High   | 14 | 12  | 18  | 12  | 1094 | 122   | 5.82  | 327  | 99.1  | 102.5 | 100.9 | 97.6  | 100.2 | 99.7  |
| Q9JLY7 | <i>Dusp14</i>   | Dual specificity  | High   | 6  | 1   | 1   | 1   | 198  | 22.3  | 9.41  | 26   | 90.3  | 105   | 91.1  | 109.2 | 98.3  | 106   |
| Q99JR1 | <i>Sfxn1</i>    | Sideroflexin-1    | High   | 38 | 10  | 16  | 9   | 322  | 35.6  | 9.23  | 337  | 98.4  | 99.2  | 96.7  | 101   | 102.7 | 101.9 |
| Q9QYE6 | <i>Golga5</i>   | Golgin subfamily  | High   | 4  | 2   | 2   | 2   | 729  | 82.3  | 6.23  | 77   | 104.5 | 111.6 | 94.4  | 99.9  | 85.4  | 104.1 |
| Q6A037 | <i>N4bp1</i>    | NEDD4-binding     | Medium | 1  | 1   | 1   | 1   | 893  | 99.1  | 5.74  | 0    |       |       |       |       |       |       |
| O88935 | <i>Syn1</i>     | Synapsin-1        | High   | 63 | 31  | 168 | 29  | 706  | 74.1  | 9.8   | 3507 | 96.5  | 97.5  | 88.9  | 107.5 | 106.4 | 103.2 |
| P70236 | <i>Map2k6</i>   | Dual specificity  | High   | 27 | 7   | 9   | 7   | 334  | 37.4  | 7.39  | 145  | 102.7 | 94.9  | 100   | 99.2  | 98.2  | 105   |
| Q8VE62 | <i>Paip1</i>    | Polyadenylate-    | High   | 10 | 4   | 4   | 4   | 400  | 45.7  | 4.55  | 28   | 100.1 | 97.1  | 96    | 96.9  | 108.6 | 101.3 |
| Q6A4J8 | <i>Usp7</i>     | Ubiquitin         | High   | 25 | 20  | 28  | 20  | 1103 | 128.4 | 5.5   | 415  | 96.8  | 98.1  | 91.7  | 105.7 | 103.4 | 104.3 |
| Q9Z0S9 | <i>Rabac1</i>   | Prenylated Rab    | High   | 8  | 1   | 2   | 1   | 185  | 20.6  | 7.9   | 31   | 104.4 | 109.4 | 102.2 | 93.2  | 98.3  | 92.4  |
| Q9EPQ7 | <i>Stard5</i>   | StAR-related      | Medium | 4  | 1   | 1   | 1   | 213  | 23.9  | 6.39  | 21   | 101.6 | 103.8 | 146.2 | 92.7  | 64.1  | 91.7  |
| Q8R0G9 | <i>Nup133</i>   | Nuclear pore      | High   | 6  | 5   | 5   | 5   | 1155 | 128.5 | 5.2   | 97   | 93.3  | 101.9 | 100.3 | 98    | 93.4  | 113.2 |
| Q80UM3 | <i>Naa15</i>    | N-alpha-          | High   | 11 | 9   | 11  | 9   | 865  | 100.9 | 7.62  | 155  | 102.9 | 102.1 | 102.5 | 97.5  | 98.3  | 96.9  |
| P97393 | <i>Arhgap5</i>  | Rho GTPase-       | High   | 5  | 7   | 7   | 7   | 1501 | 172   | 6.34  | 123  | 102.3 | 100.3 | 91.6  | 102.5 | 99.3  | 104.1 |
| Q6P069 | <i>Sri</i>      | Sorcin OS=Mus     | High   | 20 | 4   | 6   | 4   | 198  | 21.6  | 5.59  | 95   | 97.8  | 99.8  | 110.8 | 100.9 | 92.5  | 98.2  |
| Q05909 | <i>Ptprg</i>    | Receptor-type     | High   | 3  | 3   | 3   | 3   | 1442 | 161.1 | 6.46  | 48   | 96.4  | 96.2  | 91.2  | 104.5 | 110.3 | 101.4 |
| P83882 | <i>Rpl36a</i>   | 60S ribosomal     | High   | 26 | 5   | 6   | 5   | 106  | 12.4  | 10.58 | 24   | 104.8 | 91.8  | 101   | 103   | 100.2 | 99.2  |
| Q8BHK2 | <i>Scn3b</i>    | Sodium channel    | High   | 22 | 3   | 3   | 3   | 215  | 24.8  | 4.74  | 30   | 97.2  | 92.1  | 98.2  | 102.4 | 111.9 | 98.2  |
| Q6URW6 | <i>Myh14</i>    | Myosin-14         | High   | 18 | 30  | 42  | 22  | 2000 | 228.4 | 5.55  | 611  | 98.8  | 99.1  | 100.4 | 99    | 100   | 102.6 |
| Q6ZQ38 | <i>Cand1</i>    | Cullin-associated | High   | 41 | 44  | 93  | 43  | 1230 | 136.2 | 5.78  | 1700 | 99.7  | 100.9 | 98.9  | 100.7 | 98.7  | 101.2 |
| Q9D2Z4 | <i>Senp8</i>    | Sentrin-specific  | Low    | 6  | 1   | 1   | 1   | 221  | 25    | 5.95  | 16   |       |       |       |       |       |       |

|        |                  |                   |        |    |    |     |    |      |       |      |      |       |       |       |       |       |       |
|--------|------------------|-------------------|--------|----|----|-----|----|------|-------|------|------|-------|-------|-------|-------|-------|-------|
| Q8BIK4 | <i>Dock9</i>     | Dedicator of      | High   | 6  | 10 | 12  | 10 | 2055 | 235.2 | 7.25 | 150  | 98.6  | 99    | 98.4  | 95.8  | 103.8 | 104.5 |
| Q91V01 | <i>Lpcat3</i>    | Lysophospholipi   | Medium | 2  | 1  | 1   | 1  | 487  | 56.1  | 8.56 | 0    | 106.4 | 99.9  | 106.2 | 95.6  | 97.9  | 94.1  |
| Q9CQT1 | <i>Mri1</i>      | Methylthioribose- | High   | 5  | 1  | 1   | 1  | 369  | 39.4  | 5.91 | 37   | 99    | 94.6  | 104.4 | 100   | 98.9  | 103.1 |
| Q9CZ30 | <i>Ola1</i>      | Obg-like ATPase   | High   | 34 | 11 | 18  | 11 | 396  | 44.7  | 7.81 | 316  | 100.3 | 101.7 | 97.6  | 98.5  | 102.7 | 99.2  |
| Q7TSI3 | <i>Ppp6r1</i>    | Serine/threonine  | Low    | 1  | 1  | 1   | 1  | 856  | 94.5  | 4.64 | 0    |       |       |       |       |       |       |
| O35682 | <i>Myadm</i>     | Myeloid-          | High   | 10 | 2  | 2   | 2  | 320  | 35.3  | 8.31 | 33   | 84.9  | 97.6  | 96.4  | 96.6  | 128.2 | 96.3  |
| Q69ZH9 | <i>Arhgap23</i>  | Rho GTPase-       | High   | 6  | 6  | 6   | 6  | 1483 | 161.7 | 8.98 | 86   | 93.3  | 102.5 | 99.1  | 102.9 | 103.6 | 98.6  |
| Q9CZT8 | <i>Rab3b</i>     | Ras-related       | High   | 53 | 9  | 33  | 5  | 219  | 24.7  | 5.11 | 916  | 97.5  | 89.7  | 95.8  | 103.4 | 109.7 | 103.9 |
| P24668 | <i>M6pr</i>      | Cation-           | High   | 33 | 7  | 8   | 7  | 278  | 31.2  | 5.39 | 91   | 102.1 | 103.7 | 106.1 | 97.7  | 94.6  | 95.8  |
| P16110 | <i>Lgals3</i>    | Galectin-3        | High   | 4  | 1  | 1   | 1  | 264  | 27.5  | 8.38 | 21   |       |       |       |       |       |       |
| Q5NBX1 | <i>Cobl</i>      | Protein cordon-   | High   | 1  | 2  | 2   | 2  | 1337 | 143.8 | 7.77 | 25   |       |       |       |       |       |       |
| Q91ZU6 | <i>Dst</i>       | Dystonin          | High   | 10 | 60 | 67  | 57 | 7393 | 833.7 | 5.31 | 941  | 101   | 100.8 | 100.8 | 97.4  | 95.4  | 104.5 |
| Q8VCV1 | <i>Abhd17c</i>   | Alpha/beta        | High   | 3  | 1  | 1   | 1  | 320  | 35.1  | 5.64 | 38   | 93.9  | 98.7  | 98    | 103.2 | 104.2 | 102.1 |
| Q920M7 | <i>Syt17</i>     | Synaptotagmin-    | High   | 14 | 6  | 8   | 6  | 470  | 53.3  | 7.15 | 102  | 98    | 90.1  | 102.5 | 100.4 | 103.6 | 105.4 |
| Q7TNC8 | <i>Gla2</i>      | Glycine receptor  | Low    | 3  | 1  | 1   | 1  | 452  | 52    | 8.9  | 0    | 102.6 | 97.6  | 89.7  | 108.2 | 97.6  | 104.3 |
| Q9DCD2 | <i>Xab2</i>      | Pre-mRNA-         | High   | 4  | 2  | 3   | 2  | 855  | 99.9  | 6.23 | 29   | 100.6 | 102   | 90.5  | 98.5  | 103.9 | 104.5 |
| O88532 | <i>Zfr</i>       | Zinc finger RNA-  | High   | 13 | 12 | 14  | 12 | 1074 | 116.8 | 9.04 | 194  | 94    | 100.2 | 93.9  | 103.8 | 103.2 | 104.8 |
| Q9CRA8 | <i>Exosc5</i>    | Exosome           | High   | 6  | 1  | 1   | 1  | 235  | 25.2  | 7.56 | 35   |       |       |       |       |       |       |
| Q99LN9 | <i>Dohh</i>      | Deoxyhypusine     | High   | 6  | 1  | 1   | 1  | 302  | 32.9  | 4.84 | 47   | 91.4  | 103.9 | 87.9  | 103.2 | 106.6 | 107.1 |
| Q9JLC8 | <i>Sacs</i>      | Sacsin OS=Mus     | High   | 2  | 10 | 10  | 10 | 4582 | 520.4 | 7.11 | 155  | 99.6  | 104.8 | 97    | 99.7  | 97.7  | 101.3 |
| Q8BQZ4 | <i>Ralgapb</i>   | Ral GTPase-       | High   | 6  | 6  | 6   | 6  | 1484 | 165.1 | 6.77 | 113  | 93.1  | 95.9  | 91.2  | 108.4 | 102.2 | 109.2 |
| Q60590 | <i>Orm1</i>      | Alpha-1-acid      | High   | 20 | 3  | 4   | 1  | 207  | 23.9  | 5.85 | 98   | 146.9 | 80.1  | 141.8 | 79.1  | 73.4  | 78.6  |
| O08967 | <i>Cyth3</i>     | Cytohesin-3       | High   | 20 | 5  | 6   | 3  | 399  | 46.3  | 5.54 | 48   | 94.5  | 103.7 | 82.6  | 105.7 | 112.8 | 100.7 |
| Q8K224 | <i>Nat10</i>     | RNA cytidine      | High   | 6  | 4  | 4   | 4  | 1024 | 115.3 | 8.32 | 69   | 102   | 97.7  | 95.2  | 102.5 | 99.9  | 102.6 |
| Q14BI2 | <i>Grm2</i>      | Metabotropic      | High   | 19 | 18 | 22  | 16 | 872  | 95.8  | 8.06 | 212  | 95.3  | 102.6 | 88.6  | 103.8 | 103.8 | 105.8 |
| Q9JHQ5 | <i>Lztl1</i>     | Leucine zipper    | High   | 27 | 6  | 8   | 6  | 299  | 34.8  | 5.17 | 224  | 100.5 | 103.5 | 98.2  | 102.4 | 97.6  | 97.7  |
| B2RQR8 | <i>Ece2</i>      | Endothelin-       | Low    | 2  | 1  | 1   | 1  | 763  | 86.2  | 5.3  | 0    |       |       |       |       |       |       |
| O08530 | <i>S1pr1</i>     | Sphingosine 1-    | High   | 4  | 1  | 2   | 1  | 382  | 42.6  | 9.42 | 56   | 98.9  | 103.8 | 92.7  | 100.2 | 104.3 | 100.2 |
| Q8K0G5 | <i>Eipr1</i>     | EARP and          | High   | 12 | 4  | 4   | 4  | 386  | 43.1  | 5.14 | 81   | 92.7  | 92.5  | 101.7 | 108.3 | 104.1 | 100.8 |
| Q9Z2X2 | <i>Psmd10</i>    | 26S proteasome    | High   | 7  | 1  | 1   | 1  | 231  | 25.1  | 6.06 | 25   | 102.8 | 104.5 | 96.8  | 96.8  | 94.3  | 104.8 |
| A2RSJ4 | <i>Uhrf1bp1l</i> | UHRF1-binding     | High   | 5  | 6  | 7   | 6  | 1457 | 161.8 | 6.61 | 108  | 97.5  | 103   | 91.6  | 103.4 | 103.5 | 101   |
| Q9QYJ0 | <i>Dnaja2</i>    | DnaJ homolog      | High   | 31 | 13 | 29  | 13 | 412  | 45.7  | 6.48 | 489  | 98.1  | 99.1  | 99.1  | 102.1 | 103   | 98.8  |
| Q9JMH9 | <i>Myo18a</i>    | Unconventional    | High   | 24 | 44 | 59  | 44 | 2050 | 232.6 | 6.28 | 824  | 97.2  | 99.7  | 95.9  | 102.1 | 101.4 | 103.8 |
| Q06335 | <i>Aplp2</i>     | Amyloid-like      | High   | 10 | 6  | 6   | 6  | 707  | 80.4  | 4.7  | 81   | 98.6  | 102.1 | 95.6  | 100.8 | 99.3  | 103.7 |
| O35927 | <i>Ctnd2</i>     | Catenin delta-2   | High   | 24 | 21 | 25  | 19 | 1247 | 134.9 | 7.65 | 439  | 76.7  | 76.3  | 80.6  | 86.6  | 84    | 195.8 |
| O88814 | <i>Stam2</i>     | Signal            | High   | 4  | 2  | 3   | 2  | 523  | 57.4  | 5.07 | 71   | 101.1 | 95.5  | 96.5  | 93.6  | 106.7 | 106.7 |
| Q922D4 | <i>Ppp6r3</i>    | Serine/threonine  | High   | 8  | 6  | 6   | 6  | 844  | 94.6  | 4.58 | 81   | 97.2  | 101.4 | 98.7  | 100.3 | 98.8  | 103.6 |
| Q8BLE7 | <i>Slc17a6</i>   | Vesicular         | High   | 12 | 6  | 10  | 5  | 582  | 64.5  | 6.68 | 176  | 91    | 93.6  | 79.1  | 108.6 | 117   | 110.7 |
| O70228 | <i>Atp9a</i>     | Probable          | High   | 13 | 13 | 14  | 10 | 1047 | 118.5 | 7.69 | 156  | 97.4  | 101.8 | 100.3 | 99.4  | 102.3 | 98.9  |
| Q04735 | <i>Cdk16</i>     | Cyclin-           | High   | 7  | 4  | 5   | 3  | 496  | 55.9  | 7.87 | 53   | 83.3  | 97.7  | 81.2  | 102.7 | 118.6 | 116.5 |
| P59281 | <i>Arhgap39</i>  | Rho GTPase-       | High   | 5  | 5  | 7   | 5  | 1107 | 125.1 | 7.97 | 68   | 93.7  | 97.8  | 99.8  | 108.6 | 101.4 | 98.7  |
| Q80XH1 | <i>Kxd1</i>      | KxDL motif-       | Low    | 4  | 1  | 1   | 1  | 177  | 20    | 4.92 | 0    | 97.8  | 104.1 | 94.4  | 96.4  | 109.4 | 97.9  |
| P40240 | <i>Cd9</i>       | CD9 antigen       | Medium | 3  | 1  | 1   | 1  | 226  | 25.2  | 7.23 | 21   | 115.9 | 122.8 | 125.4 | 76.7  | 74    | 85.2  |
| Q61542 | <i>Stard3</i>    | StAR-related      | Medium | 4  | 1  | 1   | 1  | 446  | 50.4  | 7.49 | 0    | 95.1  | 99.3  | 97.4  | 102.1 | 97.4  | 108.8 |
| Q9D2R6 | <i>Coa3</i>      | Cytochrome c      | High   | 18 | 2  | 4   | 2  | 108  | 12    | 9.86 | 62   | 95.3  | 99.2  | 98.1  | 99.9  | 104.7 | 102.8 |
| P99024 | <i>Tubb5</i>     | Tubulin beta-5    | High   | 73 | 25 | 353 | 4  | 444  | 49.6  | 4.89 | 6304 | 98.1  | 101.6 | 90.1  | 103.8 | 103.6 | 102.9 |
| P80313 | <i>Cct7</i>      | T-complex         | High   | 51 | 23 | 55  | 23 | 544  | 59.6  | 7.84 | 1111 | 100   | 99.2  | 107   | 99    | 99    | 97.9  |
| Q922X9 | <i>Prmt7</i>     | Protein arginine  | Medium | 2  | 1  | 1   | 1  | 692  | 78.3  | 5.74 | 0    |       |       |       |       |       |       |
| Q8VCB1 | <i>Ndc1</i>      | Nucleoporin       | Medium | 1  | 1  | 1   | 1  | 673  | 75.4  | 8.9  | 0    | 103.7 | 95.6  | 99.6  | 97.4  | 105.4 | 98.3  |
| Q8BGT5 | <i>Gpt2</i>      | Alanine           | High   | 16 | 6  | 6   | 6  | 522  | 57.9  | 8    | 45   | 110.7 | 91.5  | 131.5 | 85.3  | 88.3  | 92.7  |
| Q9DD18 | <i>Dtd1</i>      | D-aminoacyl-      | High   | 27 | 5  | 6   | 5  | 209  | 23.4  | 7.87 | 110  | 96.9  | 96.5  | 101   | 95.7  | 107.4 | 102.5 |
| P17047 | <i>Lamp2</i>     | Lysosome-         | High   | 11 | 5  | 6   | 5  | 415  | 45.7  | 7.39 | 83   | 106.9 | 99    | 126   | 86.6  | 86.4  | 95.1  |
| P54731 | <i>Faf1</i>      | FAS-associated    | High   | 7  | 3  | 3   | 3  | 649  | 73.8  | 4.86 | 42   | 87.1  | 104.8 | 97.3  | 106.1 | 104.1 | 100.7 |
| Q8BGR9 | <i>Ublcp1</i>    | Ubiquitin-like    | High   | 12 | 3  | 3   | 3  | 318  | 36.8  | 6.46 | 79   | 100.3 | 99.8  | 87.7  | 107.7 | 101.8 | 102.7 |
| Q9CQC9 | <i>Sar1b</i>     | GTP-binding       | High   | 37 | 6  | 11  | 4  | 198  | 22.4  | 6.11 | 188  | 93.9  | 103.2 | 94.8  | 105.2 | 99.3  | 103.7 |
| P14094 | <i>Atp1b1</i>    | Sodium/potassiu   | High   | 38 | 13 | 76  | 13 | 304  | 35.2  | 8.65 | 1238 | 94.2  | 102.6 | 87.9  | 108.5 | 103.7 | 103.2 |
| Q8BSZ2 | <i>Ap3s2</i>     | AP-3 complex      | High   | 21 | 4  | 8   | 4  | 193  | 22    | 5.22 | 84   | 95    | 97.8  | 88.7  | 110.8 | 106.2 | 101.6 |
| Q8K0V4 | <i>Cnot3</i>     | CCR4-NOT          | High   | 3  | 2  | 2   | 2  | 751  | 81.9  | 6.2  | 46   | 90.9  | 96.4  | 95.9  | 103.2 | 95.9  | 117.6 |
| Q9ER80 | <i>Rtp4</i>      | Receptor-         | Low    | 5  | 1  | 1   | 1  | 249  | 28.4  | 9.03 | 0    |       |       |       |       |       |       |
| P97785 | <i>Gfra1</i>     | GDNF family       | Medium | 1  | 1  | 1   | 1  | 468  | 51.7  | 7.84 | 23   |       |       |       |       |       |       |
| P0CW02 | <i>Ly6c1</i>     | Lymphocyte        | High   | 15 | 1  | 1   | 1  | 131  | 14.2  | 6.01 | 74   | 96.3  | 95.8  | 106.6 | 95    | 99.7  | 106.5 |
| Q60972 | <i>Rbbp4</i>     | Histone-binding   | High   | 12 | 5  | 7   | 2  | 425  | 47.6  | 4.89 | 129  | 105.5 | 102.9 | 109.3 | 97.5  | 97.3  | 87.4  |
| P63038 | <i>Hspd1</i>     | 60 kDa heat       | High   | 74 | 35 | 136 | 35 | 573  | 60.9  | 6.18 | 3379 | 95.1  | 100.1 | 92.4  | 102.7 | 105.5 | 104.2 |
| Q99JW1 | <i>Abhd17a</i>   | Alpha/beta        | High   | 4  | 1  | 2   | 1  | 310  | 33.9  | 6.76 | 43   | 98    | 100.2 | 90.2  | 110.5 | 103.6 | 97.6  |
| P28661 | <i>Septin4</i>   | Septin-4          | High   | 31 | 14 | 20  | 11 | 478  | 54.9  | 5.87 | 351  | 99.6  | 107.7 | 98.9  | 102.6 | 94.2  | 97    |
| Q91ZJ5 | <i>Ugp2</i>      | UTP--glucose-1-   | High   | 46 | 21 | 36  | 21 | 508  | 56.9  | 7.61 | 711  | 106.8 | 104.3 | 112.1 | 90.7  | 93.4  | 92.7  |
| Q8K448 | <i>Abca5</i>     | ATP-binding       | High   | 2  | 3  | 3   | 3  | 1642 | 185.8 | 7.2  | 25   | 91.2  | 96.2  | 76.5  | 113.6 | 117.7 | 104.7 |
| Q8BRN9 | <i>Cc2d1b</i>    | Coiled-coil and   | High   | 2  | 2  | 2   | 2  | 848  | 93    | 5.41 | 21   | 94.2  | 93.9  | 113.3 | 100.6 | 92.4  | 105.7 |



|        |                  |                   |        |    |    |     |    |      |       |       |      |       |       |       |       |       |       |
|--------|------------------|-------------------|--------|----|----|-----|----|------|-------|-------|------|-------|-------|-------|-------|-------|-------|
| Q9QXL2 | <i>Kif21a</i>    | Kinesin-like      | High   | 21 | 27 | 41  | 24 | 1672 | 186.4 | 6.27  | 782  | 95.7  | 102.6 | 94.1  | 104.1 | 101.5 | 101.9 |
| P68181 | <i>Prkacb</i>    | cAMP-             | High   | 42 | 14 | 23  | 6  | 351  | 40.7  | 8.56  | 410  | 98.2  | 94    | 91    | 101.7 | 109.1 | 105.9 |
| P35279 | <i>Rab6a</i>     | Ras-related       | High   | 61 | 11 | 35  | 5  | 208  | 23.6  | 5.54  | 699  | 95.8  | 101.4 | 91.6  | 102.8 | 106.6 | 101.7 |
| Q3UJU9 | <i>Rmdn3</i>     | Regulator of      | High   | 17 | 7  | 8   | 7  | 470  | 52    | 5.21  | 199  | 93.2  | 99.8  | 95.4  | 97    | 105.7 | 109   |
| Q8BR76 | <i>Tmem67</i>    | Meckelin          | Medium | 2  | 1  | 1   | 1  | 992  | 111.7 | 7.74  | 0    | 98.5  | 103.7 | 87.2  | 97.8  | 109.7 | 103.1 |
| P62908 | <i>Rps3</i>      | 40S ribosomal     | High   | 65 | 17 | 31  | 17 | 243  | 26.7  | 9.66  | 443  | 104.8 | 101.6 | 106.4 | 95.9  | 96.4  | 94.9  |
| P70265 | <i>Pfkfb2</i>    | 6-phosphofructo-  | High   | 2  | 1  | 2   | 1  | 519  | 59.9  | 8.12  | 77   | 101.1 | 102.4 | 92.2  | 100.1 | 101.2 | 103.1 |
| Q8VCL2 | <i>Sco2</i>      | Protein SCO2      | Low    | 3  | 1  | 1   | 1  | 255  | 28.9  | 8.29  | 0    |       |       |       |       |       |       |
| Q8BWY7 | <i>Slc39a11</i>  | Zinc transporter  | Medium | 4  | 1  | 1   | 1  | 342  | 35.4  | 5.11  | 0    | 101.5 | 90.5  | 99.4  | 105.5 | 105.5 | 97.6  |
| Q8BYC6 | <i>Taok3</i>     | Serine/threonine  | High   | 3  | 3  | 4   | 1  | 898  | 105.3 | 7.36  | 67   |       |       |       |       |       |       |
| Q8BP00 | <i>Iqcb1</i>     | IQ calmodulin-    | High   | 9  | 5  | 8   | 5  | 598  | 68.7  | 9.31  | 147  | 95.5  | 96.5  | 99.7  | 100.4 | 104.8 | 103.2 |
| P63080 | <i>Gabrb3</i>    | Gamma-            | High   | 27 | 11 | 18  | 6  | 473  | 54.1  | 9.1   | 336  | 99.6  | 93.1  | 104.6 | 98.9  | 99.4  | 104.3 |
| Q8R332 | <i>Nup58</i>     | Nucleoporin       | High   | 6  | 3  | 3   | 3  | 587  | 59.4  | 9.29  | 49   | 93.1  | 99.1  | 96.7  | 95.8  | 110.9 | 104.3 |
| Q922P8 | <i>Tmem132a</i>  | Transmembrane     | High   | 7  | 4  | 4   | 4  | 1018 | 110.2 | 5.63  | 36   | 98.1  | 98.8  | 103.6 | 98.3  | 97.4  | 103.7 |
| Q7TN29 | <i>Smap2</i>     | Stromal           | High   | 24 | 6  | 8   | 6  | 428  | 46.5  | 8.87  | 217  | 99.3  | 101.7 | 95.3  | 101.7 | 101.6 | 100.4 |
| P84084 | <i>Arf5</i>      | ADP-ribosylation  | High   | 64 | 11 | 45  | 5  | 180  | 20.5  | 6.79  | 1111 | 94.4  | 94.8  | 91.2  | 104.3 | 108.8 | 106.4 |
| Q9D0S9 | <i>Hint2</i>     | Histidine triad   | High   | 42 | 6  | 9   | 6  | 163  | 17.3  | 9.82  | 204  | 97.3  | 103.2 | 92.9  | 101.9 | 100.8 | 103.9 |
| O70370 | <i>Ctss</i>      | Cathepsin S       | High   | 21 | 6  | 8   | 6  | 340  | 38.4  | 6.96  | 108  | 116.9 | 110.8 | 148.9 | 77    | 71.8  | 74.6  |
| Q9DBC7 | <i>Prkar1a</i>   | cAMP-             | High   | 27 | 11 | 14  | 7  | 381  | 43.2  | 5.35  | 232  | 95    | 98    | 100.8 | 102.8 | 99.4  | 103.9 |
| Q8K1R3 | <i>Pnpt1</i>     | Polyribonucleotid | High   | 11 | 7  | 9   | 7  | 783  | 85.6  | 8.03  | 73   | 95    | 102.8 | 100.9 | 100.8 | 99.9  | 100.6 |
| Q9WV34 | <i>Mpp2</i>      | MAGUK p55         | High   | 50 | 27 | 43  | 26 | 552  | 61.5  | 6.44  | 825  | 98.4  | 98.1  | 94    | 106.1 | 100.3 | 103.2 |
| Q616G8 | <i>Hecw2</i>     | E3 ubiquitin-     | High   | 4  | 6  | 6   | 4  | 1578 | 176.1 | 5.41  | 92   | 89.6  | 96.7  | 82    | 113.7 | 110.1 | 108   |
| Q99M28 | <i>Rnps1</i>     | RNA-binding       | High   | 5  | 1  | 1   | 1  | 305  | 34.2  | 11.84 | 57   | 105.5 | 92.7  | 118.2 | 85.5  | 103.6 | 94.5  |
| O54962 | <i>Banf1</i>     | Barrier-to-       | High   | 36 | 2  | 3   | 2  | 89   | 10.1  | 6.09  | 22   | 98.9  | 88.4  | 99.6  | 104.8 | 108.2 | 100.1 |
| Q9R0N5 | <i>Syt5</i>      | Synaptotagmin-5   | High   | 20 | 9  | 16  | 5  | 386  | 43.1  | 9.6   | 207  | 96.4  | 94.4  | 104.5 | 97.7  | 109.1 | 98    |
| P62827 | <i>Ran</i>       | GTP-binding       | High   | 30 | 6  | 21  | 6  | 216  | 24.4  | 7.49  | 406  | 99.3  | 100.2 | 101.1 | 99.1  | 98.6  | 101.7 |
| Q8BKX6 | <i>Smg1</i>      | Serine/threonine  | High   | 1  | 2  | 2   | 2  | 3658 | 409.5 | 6.4   | 37   | 91.4  | 102.6 | 98.6  | 99.3  | 102.3 | 105.7 |
| Q8BX17 | <i>Gemin5</i>    | Gem-associated    | High   | 3  | 4  | 5   | 4  | 1502 | 166.5 | 6.71  | 86   | 98.3  | 101.8 | 96.8  | 102.4 | 99    | 101.6 |
| Q05793 | <i>Hspg2</i>     | Basement          | High   | 2  | 6  | 6   | 6  | 3707 | 398   | 6.32  | 73   | 118.8 | 98.3  | 121.5 | 81.8  | 82    | 97.6  |
| Q91VC3 | <i>Eif4a3</i>    | Eukaryotic        | High   | 28 | 13 | 20  | 10 | 411  | 46.8  | 6.73  | 136  | 102.7 | 98.8  | 105.7 | 99.6  | 96.9  | 96.4  |
| O09172 | <i>Gclm</i>      | Glutamate--       | High   | 23 | 5  | 5   | 5  | 274  | 30.5  | 5.52  | 52   | 101.7 | 104.3 | 99.7  | 103.2 | 101   | 90.3  |
| P50172 | <i>Hsd11b1</i>   | Corticosteroid    | High   | 3  | 1  | 1   | 1  | 292  | 32.3  | 8.46  | 33   | 86.3  | 85.1  | 99.7  | 109.3 | 102.2 | 117.6 |
| Q8VDH1 | <i>Fbxo21</i>    | F-box only        | High   | 2  | 1  | 1   | 1  | 627  | 72.1  | 6.06  | 23   | 85.2  | 91.4  | 87.2  | 95.7  | 95.2  | 145.3 |
| Q9D853 | <i>Eef1akmt2</i> | EEF1A lysine      | Medium | 4  | 1  | 1   | 1  | 244  | 26.8  | 5.15  | 0    |       |       |       |       |       |       |
| Q91XF0 | <i>Pnpo</i>      | Pyridoxine-5'-    | High   | 7  | 2  | 2   | 2  | 261  | 30.1  | 8.22  | 24   | 103.4 | 103.4 | 104.3 | 97.8  | 94.6  | 96.5  |
| Q8BH86 | <i>Dglucy</i>    | D-glutamate       | High   | 8  | 3  | 3   | 3  | 617  | 66.3  | 7.09  | 49   | 93.1  | 99.7  | 97.6  | 104.5 | 101.3 | 103.9 |
| Q3UQ22 | <i>Ntn5</i>      | Netrin-5          | Low    | 2  | 1  | 1   | 1  | 452  | 48.8  | 9.52  | 0    |       |       |       |       |       |       |
| P68372 | <i>Tubb4b</i>    | Tubulin beta-4B   | High   | 73 | 25 | 347 | 1  | 445  | 49.8  | 4.89  | 6129 | 99.3  | 110.9 | 93.9  | 106.3 | 100.4 | 89.1  |
| Q9JJC6 | <i>Rilp1</i>     | RILP-like protein | High   | 23 | 7  | 7   | 7  | 406  | 47.3  | 5.16  | 113  | 97.5  | 107.7 | 96.5  | 100.9 | 98.5  | 98.8  |
| Q3ULB5 | <i>Pak6</i>      | Serine/threonine  | Medium | 2  | 1  | 1   | 1  | 682  | 74.8  | 9.44  | 14   |       |       |       |       |       |       |
| A2AIL4 | <i>Ndufaf6</i>   | NADH              | High   | 6  | 1  | 1   | 1  | 333  | 38.3  | 9.44  | 35   | 87.3  | 87.5  | 97.5  | 102.7 | 109.7 | 115.3 |
| Q8K3V4 | <i>Padi6</i>     | Protein-arginine  | Medium | 2  | 1  | 1   | 1  | 682  | 76.7  | 5.52  | 0    | 85.9  | 96.2  | 92.5  | 104.6 | 127.6 | 93.2  |
| P17879 | <i>Hspa1b</i>    | Heat shock 70     | High   | 39 | 20 | 47  | 14 | 642  | 70.1  | 5.72  | 790  | 103.7 | 111.6 | 109   | 95.6  | 86.1  | 94    |
| Q8VDG5 | <i>Ppcs</i>      | Phosphopantoth    | Medium | 3  | 1  | 1   | 1  | 311  | 33.8  | 6.55  | 20   | 100.1 | 92.9  | 103.1 | 104.5 | 95.4  | 104   |
| O08539 | <i>Bin1</i>      | Myc box-          | High   | 55 | 26 | 66  | 25 | 588  | 64.4  | 5.03  | 928  | 98.5  | 105   | 90.5  | 102.3 | 102.5 | 101.2 |
| Q8R0F8 | <i>Fahd1</i>     | Acylpyruvase      | High   | 26 | 4  | 7   | 4  | 227  | 25.2  | 7.69  | 187  | 94.8  | 106.2 | 90.6  | 103.6 | 103.9 | 100.8 |
| D327H4 | <i>Gsg1l</i>     | Germ cell-        | High   | 7  | 2  | 2   | 2  | 322  | 35.9  | 7.01  | 33   | 114.6 | 86.5  | 128.2 | 78.5  | 116.2 | 76    |
| Q9R087 | <i>Gpc6</i>      | Glypican-6        | High   | 3  | 1  | 1   | 1  | 555  | 63    | 5.43  | 36   | 102.2 | 92.5  | 95.2  | 103.2 | 98.3  | 108.5 |
| Q91WP6 | <i>Serpina3n</i> | Serine protease   | High   | 30 | 11 | 19  | 9  | 418  | 46.7  | 5.82  | 408  | 181   | 94.6  | 168.6 | 51.8  | 51.8  | 52.1  |
| Q9ERF3 | <i>Wdr61</i>     | WD repeat-        | High   | 16 | 3  | 5   | 3  | 305  | 33.8  | 5.36  | 150  | 98.2  | 108.3 | 111.7 | 93.7  | 94.5  | 93.6  |
| Q9CRT8 | <i>Xpot</i>      | Exportin-T        | High   | 10 | 7  | 10  | 7  | 963  | 109.7 | 5.25  | 173  | 94.5  | 94    | 95    | 103   | 106.3 | 107.3 |
| Q8BU11 | <i>Tox4</i>      | TOX high          | Medium | 1  | 1  | 1   | 1  | 619  | 65.9  | 5.01  | 26   | 93.1  | 87.4  | 105.6 | 103.9 | 107.3 | 102.7 |
| P01864 |                  | Ig gamma-2A       | High   | 17 | 4  | 18  | 4  | 335  | 36.6  | 8.22  | 459  | 147.5 | 76.2  | 202   | 55.4  | 59.1  | 59.8  |
| Q8QZY6 | <i>Tspan14</i>   | Tetraspanin-14    | High   | 6  | 1  | 1   | 1  | 270  | 30.7  | 6.51  | 15   | 95    | 106.7 | 101.4 | 91    | 103.6 | 102.3 |
| Q01097 | <i>Grin2b</i>    | Glutamate         | High   | 20 | 22 | 25  | 22 | 1482 | 165.9 | 6.87  | 346  | 96    | 101   | 88.9  | 105.7 | 101.9 | 106.5 |
| Q8R3T5 | <i>Stxbp6</i>    | Syntaxin-binding  | High   | 15 | 3  | 3   | 3  | 210  | 23.7  | 9.19  | 76   | 103.1 | 109   | 93.1  | 100.3 | 91    | 103.4 |
| P56818 | <i>Bace1</i>     | Beta-secretase 1  | High   | 2  | 1  | 1   | 1  | 501  | 55.7  | 5.6   | 34   | 159.3 | 65.8  | 87.2  | 61.1  | 72.1  | 154.4 |
| Q6PH08 | <i>Erc2</i>      | ERC protein 2     | High   | 32 | 35 | 53  | 25 | 957  | 110.6 | 7.03  | 964  | 95.2  | 99.7  | 92.2  | 104.3 | 105.2 | 103.4 |
| P68033 | <i>Actc1</i>     | Actin, alpha      | High   | 51 | 16 | 213 | 6  | 377  | 42    | 5.39  | 3850 | 102.2 | 99.5  | 104.6 | 94.5  | 102.1 | 97.1  |
| Q8R151 | <i>Znfx1</i>     | NFX1-type zinc    | High   | 5  | 8  | 8   | 8  | 1909 | 218.7 | 7.47  | 77   | 97.8  | 100.7 | 93.1  | 109.2 | 95.7  | 103.5 |
| P59016 | <i>Vps33b</i>    | Vacuolar protein  | High   | 19 | 10 | 13  | 10 | 617  | 70.5  | 6.86  | 268  | 95    | 101   | 95.5  | 102   | 102.7 | 103.8 |
| Q9CQL4 | <i>Mrp120</i>    | 39S ribosomal     | Medium | 5  | 1  | 1   | 1  | 149  | 17.6  | 11.11 | 0    |       |       |       |       |       |       |
| P11087 | <i>Col1a1</i>    | Collagen alpha-   | Low    | 2  | 1  | 1   | 1  | 1453 | 137.9 | 5.85  | 0    | 129   | 110.8 | 74.5  | 84.1  | 68.5  | 133.3 |
| Q0PHV7 | <i>Dact3</i>     | Dapper homolog    | Low    | 2  | 1  | 1   | 1  | 610  | 63.2  | 10.42 | 0    | 97.8  | 104.9 | 80.7  | 102.2 | 114.7 | 99.6  |
| Q4VBD9 | <i>Gzf1</i>      | GDNF-inducible    | Low    | 2  | 1  | 1   | 1  | 706  | 79.5  | 7.97  | 24   | 74.5  | 69.8  | 86.6  | 86    | 140.2 | 143   |
| Q8R307 | <i>Vps18</i>     | Vacuolar protein  | High   | 9  | 6  | 8   | 6  | 973  | 110.1 | 6.09  | 173  | 126.4 | 88.5  | 135.3 | 82.9  | 83.9  | 83    |
| Q9WVK4 | <i>Ehd1</i>      | EH domain-        | High   | 39 | 16 | 21  | 11 | 534  | 60.6  | 6.83  | 271  | 103.9 | 102.3 | 108.7 | 94    | 95.7  | 95.4  |
| Q91YS8 | <i>Camk1</i>     | Calcium/calmod    | High   | 36 | 10 | 19  | 6  | 374  | 41.6  | 5.35  | 297  | 119.7 | 92.8  | 122.4 | 85.7  | 88.5  | 90.9  |

|        |                 |                  |        |    |    |     |    |      |       |      |      |       |       |       |       |       |       |
|--------|-----------------|------------------|--------|----|----|-----|----|------|-------|------|------|-------|-------|-------|-------|-------|-------|
| O70362 | <i>Gpld1</i>    | Phosphatidylinos | High   | 5  | 4  | 4   | 4  | 837  | 93.2  | 7.12 | 28   | 148.8 | 76    | 180.5 | 64.3  | 63.1  | 67.3  |
| Q3TB82 | <i>Plekhl1</i>  | Pleckstrin       | Medium | 4  | 1  | 1   | 1  | 279  | 31.1  | 8.1  | 18   | 96.6  | 113   | 97.9  | 95.9  | 103.6 | 93.1  |
| Q9DBS1 | <i>Tmem43</i>   | Transmembrane    | High   | 11 | 4  | 4   | 4  | 400  | 44.8  | 7.36 | 29   | 101.8 | 97.1  | 107.6 | 95.2  | 99.4  | 98.9  |
| Q9WU60 | <i>Atrn</i>     | Attractin        | High   | 1  | 1  | 1   | 1  | 1428 | 158   | 7.27 | 35   | 87.8  | 98    | 93.9  | 101.3 | 111.3 | 107.8 |
| Q80TJ1 | <i>Cadps</i>    | Calcium-         | High   | 38 | 43 | 89  | 36 | 1355 | 153   | 5.74 | 1458 | 95.3  | 101.4 | 87.5  | 106.6 | 104.8 | 104.5 |
| Q64324 | <i>Stxbp2</i>   | Syntaxin-binding | High   | 2  | 2  | 3   | 1  | 593  | 66.3  | 6.74 | 27   | 133.7 | 95    | 163.9 | 65.8  | 70    | 71.7  |
| Q3TCN2 | <i>Plbd2</i>    | Putative         | High   | 6  | 3  | 4   | 3  | 594  | 66.2  | 6.13 | 120  | 96.7  | 101.6 | 95.8  | 103.2 | 101.9 | 100.9 |
| Q922H2 | <i>Pdk3</i>     | [Pyruvate        | High   | 23 | 7  | 9   | 6  | 415  | 47.9  | 8.82 | 191  | 100.8 | 102.6 | 93.8  | 103.1 | 99.9  | 99.7  |
| Q9R078 | <i>Prkab1</i>   | 5'-AMP-activated | High   | 7  | 1  | 2   | 1  | 270  | 30.3  | 6.23 | 14   | 85.3  | 102.5 | 89.7  | 108.2 | 117.2 | 97    |
| Q6NS52 | <i>Dgkb</i>     | Diacylglycerol   | High   | 13 | 9  | 11  | 9  | 802  | 90.2  | 7.93 | 114  | 93.8  | 96.7  | 92.3  | 101.3 | 108.3 | 107.5 |
| Q8R2U4 | <i>Ntmt1</i>    | N-terminal Xaa-  | High   | 6  | 1  | 2   | 1  | 223  | 25.4  | 6.9  | 55   | 95.2  | 96.1  | 94.4  | 107   | 108.6 | 98.8  |
| Q8R3V5 | <i>Sh3glb2</i>  | Endophilin-B2    | High   | 48 | 18 | 26  | 17 | 400  | 44.5  | 5.82 | 380  | 95.4  | 100   | 88.2  | 105.4 | 106.2 | 104.8 |
| Q62383 | <i>Supt6h</i>   | Transcription    | High   | 2  | 2  | 2   | 2  | 1726 | 199   | 4.93 | 57   | 100.2 | 96.8  | 91.3  | 99.8  | 105.9 | 106.1 |
| Q9CZ04 | <i>Cops7a</i>   | COP9             | High   | 31 | 7  | 12  | 7  | 275  | 30.2  | 7.87 | 232  | 97.6  | 100.9 | 97.5  | 100.6 | 102.4 | 100.9 |
| Q9WTS6 | <i>Tenm3</i>    | Teneurin-3       | High   | 1  | 4  | 4   | 3  | 2715 | 302.9 | 6.51 | 39   | 94.5  | 84.3  | 105   | 98.4  | 119.5 | 98.3  |
| Q99K30 | <i>Eps8l2</i>   | Epidermal        | High   | 2  | 1  | 1   | 1  | 729  | 82.2  | 7.18 | 32   | 102.7 | 99.4  | 102.5 | 103.5 | 96.1  | 95.7  |
| O35381 | <i>Anp32a</i>   | Acidic leucine-  | High   | 31 | 9  | 25  | 6  | 247  | 28.5  | 4.07 | 374  | 104.8 | 98.8  | 107   | 96.1  | 97.7  | 95.6  |
| Q05BC3 | <i>Eml1</i>     | Echinoderm       | High   | 7  | 6  | 6   | 6  | 814  | 89.6  | 7.02 | 80   | 97.5  | 106.9 | 95.7  | 98    | 103.9 | 98.1  |
| Q9JHU9 | <i>Isyna1</i>   | Inositol-3-      | High   | 10 | 4  | 6   | 4  | 557  | 60.9  | 6.42 | 105  | 98.4  | 101.5 | 96.9  | 95.7  | 105.3 | 102.2 |
| Q9ER69 | <i>Wtap</i>     | Pre-mRNA-        | Medium | 3  | 1  | 1   | 1  | 396  | 44.2  | 5.25 | 0    |       |       |       |       |       |       |
| Q9JME7 | <i>Trappc2l</i> | Trafficking      | High   | 22 | 3  | 3   | 3  | 139  | 16    | 6.77 | 75   | 96.8  | 107.1 | 93.5  | 102.9 | 101.8 | 97.9  |
| O55106 | <i>Strn</i>     | Striatin OS=Mus  | High   | 33 | 18 | 22  | 17 | 780  | 85.9  | 5.27 | 263  | 96.8  | 97.1  | 97.9  | 101.6 | 100.9 | 105.7 |
| Q8K1T1 | <i>Lrrc25</i>   | Leucine-rich     | Low    | 5  | 1  | 1   | 1  | 297  | 32.7  | 8.24 | 0    | 103.9 | 100.7 | 112.3 | 96.7  | 97.2  | 89.2  |
| P60761 | <i>Nrgn</i>     | Neurogranin      | High   | 60 | 3  | 8   | 3  | 78   | 7.5   | 7.05 | 220  | 87.9  | 97.8  | 92.2  | 117.1 | 101.5 | 103.5 |
| P97797 | <i>Sirpa</i>    | Tyrosine-protein | High   | 38 | 12 | 30  | 12 | 513  | 56.4  | 8.28 | 455  | 95.8  | 99.5  | 87.8  | 105.4 | 105.8 | 105.6 |
| Q3V129 | <i>Ulk4</i>     | Serine/threonine | Low    | 1  | 1  | 1   | 1  | 1303 | 145.3 | 6.27 | 0    | 93.3  | 96.4  | 77.2  | 97.9  | 117.1 | 118   |
| Q7TMF3 | <i>Ndufa12</i>  | NADH             | High   | 64 | 7  | 15  | 7  | 145  | 17.1  | 9.36 | 260  | 95.2  | 103.3 | 87.6  | 107.4 | 102.7 | 103.8 |
| Q8VI63 | <i>Mob2</i>     | MOB kinase       | High   | 15 | 4  | 6   | 4  | 235  | 26.8  | 6.52 | 60   | 94.3  | 105.9 | 91.1  | 103   | 105.1 | 100.6 |
| P31532 | <i>Saa4</i>     | Serum amyloid    | High   | 8  | 1  | 1   | 1  | 130  | 15.1  | 9.26 | 29   | 162.9 | 65.5  | 198.3 | 57    | 59.7  | 56.6  |
| Q60648 | <i>Gm2a</i>     | Ganglioside      | High   | 26 | 4  | 6   | 4  | 193  | 20.8  | 5.9  | 127  | 109.9 | 101.4 | 116   | 87.4  | 91.8  | 93.6  |
| O35926 | <i>Cdk5r2</i>   | Cyclin-          | High   | 5  | 2  | 2   | 2  | 369  | 38.9  | 9.72 | 27   | 97.3  | 96.5  | 92.2  | 109   | 102.5 | 102.5 |
| Q8BGB8 | <i>Coq4</i>     | Ubiquinone       | Medium | 4  | 1  | 1   | 1  | 266  | 30.1  | 9.26 | 0    |       |       |       |       |       |       |
| Q8BGE6 | <i>Atg4b</i>    | Cysteine         | High   | 8  | 2  | 3   | 2  | 393  | 44.3  | 5.07 | 75   | 99.1  | 93.8  | 108   | 99.2  | 97.1  | 102.8 |
| Q8BXN7 | <i>Ppm1k</i>    | Protein          | Low    | 3  | 1  | 1   | 1  | 372  | 40.9  | 6.39 | 0    | 99.6  | 93.4  | 95.8  | 104.5 | 116.3 | 90.4  |
| Q5DID3 | <i>Umodl1</i>   | Uromodulin-like  | Low    | 2  | 1  | 1   | 1  | 1319 | 145.2 | 6.67 | 0    |       |       |       |       |       |       |
| Q61171 | <i>Prdx2</i>    | Peroxioredoxin-2 | High   | 54 | 8  | 38  | 8  | 198  | 21.8  | 5.41 | 922  | 99.2  | 97.9  | 96.8  | 99.5  | 103.8 | 102.8 |
| Q91XV3 | <i>Basp1</i>    | Brain acid       | High   | 93 | 20 | 123 | 20 | 226  | 22.1  | 4.51 | 2304 | 93.7  | 92.8  | 85.9  | 104.9 | 114.6 | 108.1 |
| Q9WUP4 | <i>Srd5a3</i>   | Polyprenol       | High   | 5  | 1  | 1   | 1  | 330  | 37.9  | 9.79 | 44   | 95.9  | 100.9 | 100.8 | 96.4  | 107.5 | 98.4  |
| P97390 | <i>Vps45</i>    | Vacuolar protein | High   | 27 | 15 | 21  | 15 | 570  | 65    | 8.25 | 320  | 97.1  | 98.5  | 96.8  | 100.5 | 102.9 | 104.2 |
| Q6P9R4 | <i>Arhgef18</i> | Rho guanine      | High   | 1  | 1  | 1   | 1  | 1405 | 155.9 | 6.54 | 24   |       |       |       |       |       |       |
| Q8K2T4 | <i>Uqcc3</i>    | Ubiquinol-       | Medium | 11 | 1  | 1   | 1  | 89   | 9.6   | 9.52 | 17   | 98.1  | 112.4 | 99.8  | 96.6  | 97.4  | 95.7  |
| Q9WVE8 | <i>Pacsin2</i>  | Protein kinase C | High   | 32 | 14 | 22  | 12 | 486  | 55.8  | 5.2  | 376  | 103.4 | 102.7 | 103.2 | 97.9  | 95.4  | 97.4  |
| Q69ZP3 | <i>Pnkd</i>     | Probable         | Medium | 4  | 1  | 1   | 1  | 385  | 43    | 8.94 | 13   | 88.2  | 113.5 | 90.7  | 116.3 | 87.1  | 104.2 |
| Q9DAM5 | <i>Slc25a19</i> | Mitochondrial    | Medium | 3  | 1  | 1   | 1  | 318  | 35.6  | 9.2  | 30   |       |       |       |       |       |       |
| Q9R0N3 | <i>Syt11</i>    | Synaptotagmin-   | High   | 14 | 5  | 6   | 5  | 430  | 48.3  | 9.11 | 132  | 94.4  | 100.5 | 99.3  | 98.4  | 100.5 | 106.9 |
| P97412 | <i>Lyst</i>     | Lysosomal-       | High   | 1  | 3  | 3   | 3  | 3788 | 425   | 6.6  | 37   | 101.4 | 100.4 | 93.9  | 96.5  | 102.7 | 105.2 |
| Q8VD33 | <i>Sgtb</i>     | Small glutamine- | High   | 24 | 5  | 7   | 5  | 304  | 33.4  | 4.92 | 127  | 98.5  | 100.6 | 86.4  | 105.9 | 105.6 | 103   |
| Q8CI70 | <i>Lrrc20</i>   | Leucine-rich     | Low    | 4  | 1  | 1   | 1  | 184  | 20.8  | 5.66 | 0    | 102.5 | 100.8 | 101   | 99.3  | 98.2  | 98.2  |
| P35290 | <i>Rab24</i>    | Ras-related      | High   | 41 | 8  | 9   | 8  | 203  | 23.1  | 6.23 | 125  | 93.1  | 91.3  | 94.8  | 110.2 | 108.7 | 101.9 |
| Q3KNM2 | <i>Marchf5</i>  | E3 ubiquitin-    | High   | 16 | 3  | 3   | 3  | 278  | 31.2  | 8.7  | 91   | 99.2  | 100.9 | 99.5  | 102.3 | 98.1  | 100.1 |
| Q91V92 | <i>Acly</i>     | ATP-citrate      | High   | 36 | 32 | 57  | 32 | 1091 | 119.7 | 7.44 | 998  | 98.4  | 101.5 | 95.1  | 101.5 | 101.5 | 102   |
| P98200 | <i>Atp8a2</i>   | Phospholipid-    | High   | 3  | 3  | 4   | 3  | 1148 | 129.3 | 7.33 | 105  | 100.1 | 93.8  | 88.8  | 106.9 | 103.7 | 106.6 |
| Q8VCT3 | <i>Rnpep</i>    | Aminopeptidase   | High   | 21 | 11 | 14  | 11 | 650  | 72.4  | 5.35 | 174  | 100.7 | 102.9 | 105.9 | 95.2  | 94.6  | 100.7 |
| Q9JMH6 | <i>Txnrd1</i>   | Thioredoxin      | High   | 18 | 7  | 10  | 7  | 613  | 67    | 7.44 | 249  | 104.2 | 97.3  | 102.2 | 94.1  | 98.1  | 104.1 |
| Q9DB77 | <i>Uqcrc2</i>   | Cytochrome b-c1  | High   | 43 | 17 | 47  | 17 | 453  | 48.2  | 9.25 | 936  | 96.4  | 105.5 | 95.6  | 101.1 | 100.1 | 101.3 |
| P70414 | <i>Slc8a1</i>   | Sodium/calcium   | High   | 13 | 10 | 17  | 10 | 970  | 108   | 5    | 249  | 99.3  | 93.9  | 94.9  | 101.9 | 106.2 | 103.8 |
| P59708 | <i>Sf3b6</i>    | Splicing factor  | High   | 23 | 3  | 5   | 3  | 125  | 14.6  | 9.38 | 105  | 96.3  | 98.3  | 101.7 | 99.3  | 103.8 | 100.6 |
| Q7TQF7 | <i>Amph</i>     | Amphiphysin      | High   | 43 | 23 | 44  | 22 | 686  | 75    | 4.63 | 761  | 98.2  | 100.5 | 93.9  | 101.5 | 100.5 | 105.3 |
| P46460 | <i>Nsf</i>      | Vesicle-fusing   | High   | 54 | 40 | 147 | 39 | 744  | 82.6  | 6.95 | 2893 | 95.4  | 99.2  | 93.4  | 103   | 105.7 | 103.3 |
| P56395 | <i>Cyb5a</i>    | Cytochrome b5    | High   | 32 | 4  | 5   | 4  | 134  | 15.2  | 5.07 | 40   | 96.1  | 100.3 | 95.5  | 103.6 | 103   | 101.5 |
| Q9CR21 | <i>Ndufab1</i>  | Acyl carrier     | High   | 21 | 4  | 10  | 4  | 156  | 17.4  | 5.21 | 128  | 91.7  | 102.6 | 95.4  | 103.9 | 100.9 | 105.5 |
| Q61595 | <i>Ktn1</i>     | Kinectin         | High   | 20 | 21 | 23  | 21 | 1327 | 152.5 | 5.86 | 371  | 101.3 | 101.1 | 103.5 | 99.7  | 97    | 97.3  |
| Q99LB7 | <i>Sardh</i>    | Sarcosine        | Low    | 1  | 1  | 1   | 1  | 919  | 101.6 | 6.74 | 0    |       |       |       |       |       |       |
| Q6ZWZ2 | <i>Ube2r2</i>   | Ubiquitin-       | High   | 8  | 2  | 2   | 2  | 238  | 27.1  | 4.42 | 43   | 98.8  | 102.8 | 100.2 | 97.3  | 102.2 | 98.7  |
| Q8VD04 | <i>Gripap1</i>  | GRIP1-           | High   | 33 | 22 | 28  | 22 | 806  | 92.7  | 5.25 | 396  | 95.3  | 96.6  | 94.6  | 102.5 | 103.4 | 107.7 |
| Q8K203 | <i>Neil3</i>    | Endonuclease 8-  | Medium | 1  | 1  | 1   | 1  | 606  | 67.4  | 9.01 | 18   | 92.1  | 94.1  | 95.6  | 86.8  | 96.8  | 134.5 |
| Q3TBL6 | <i>Tnfrsf8</i>  | Tumor necrosis   | Medium | 4  | 1  | 1   | 1  | 204  | 23.2  | 7.96 | 28   | 97.9  | 83.7  | 106.5 | 93.8  | 116.7 | 101.4 |
| Q3TY86 | <i>Aifm3</i>    | Apoptosis-       | High   | 10 | 5  | 6   | 5  | 605  | 66.8  | 9.04 | 55   | 97.3  | 107.4 | 87.1  | 102.1 | 104.6 | 101.5 |

|        |                  |                   |        |    |    |     |    |      |       |       |       |       |       |       |       |       |       |
|--------|------------------|-------------------|--------|----|----|-----|----|------|-------|-------|-------|-------|-------|-------|-------|-------|-------|
| P19221 | <i>F2</i>        | Prothrombin       | High   | 12 | 6  | 7   | 6  | 618  | 70.2  | 6.43  | 57    | 139.2 | 87    | 161.8 | 68.6  | 69.8  | 73.6  |
| P63260 | <i>Actg1</i>     | Actin,            | High   | 63 | 19 | 438 | 1  | 375  | 41.8  | 5.48  | 11310 | 91.8  | 94.4  | 97.4  | 99.5  | 107.3 | 109.6 |
| Q91WK7 | <i>Eif3h</i>     | Eukaryotic        | High   | 27 | 7  | 8   | 7  | 352  | 39.8  | 6.67  | 217   | 103.1 | 102.9 | 107.1 | 96.9  | 94.3  | 95.7  |
| Q2PFD7 | <i>Psd3</i>      | PH and SEC7       | High   | 17 | 17 | 31  | 17 | 1037 | 114.7 | 6.24  | 512   | 98.2  | 92.7  | 97.5  | 105.8 | 104.1 | 101.7 |
| Q9R1R2 | <i>Trim3</i>     | Tripartite motif- | High   | 13 | 8  | 9   | 8  | 744  | 80.7  | 7.81  | 195   | 96.8  | 98.1  | 99.1  | 101.3 | 97.9  | 106.8 |
| Q8C7X2 | <i>Emc1</i>      | ER membrane       | High   | 18 | 14 | 17  | 14 | 997  | 111.5 | 7.43  | 187   | 96.8  | 101.8 | 95.7  | 98.6  | 102.9 | 104.2 |
| Q9QZF2 | <i>Gpc1</i>      | Glypican-1        | High   | 25 | 9  | 10  | 9  | 557  | 61.3  | 7.05  | 224   | 97.3  | 102.5 | 103.3 | 98.6  | 98.5  | 99.8  |
| Q05186 | <i>Rcn1</i>      | Reticulocalbin-1  | High   | 19 | 5  | 5   | 5  | 325  | 38.1  | 4.84  | 103   | 94.6  | 92.5  | 110.7 | 97.6  | 102.4 | 102.1 |
| Q9DBL1 | <i>Acadsb</i>    | Short/branched    | High   | 25 | 8  | 12  | 8  | 432  | 47.8  | 7.87  | 305   | 100.6 | 98.5  | 108.1 | 95.4  | 97.1  | 100.4 |
| Q08288 | <i>Lyar</i>      | Cell growth-      | High   | 4  | 1  | 1   | 1  | 388  | 43.7  | 9.5   | 37    | 93    | 104.4 | 95.1  | 102.1 | 105.8 | 99.6  |
| P29758 | <i>Oat</i>       | Ornithine         | High   | 46 | 14 | 24  | 14 | 439  | 48.3  | 6.62  | 473   | 101.4 | 102.8 | 114.7 | 99.2  | 93.2  | 88.6  |
| Q9ERE7 | <i>Mesd</i>      | LRP chaperone     | High   | 31 | 5  | 6   | 5  | 224  | 25.2  | 6.34  | 73    | 94    | 89.3  | 100.8 | 95.8  | 108   | 112.2 |
| Q9CQC6 | <i>Bzw1</i>      | Basic leucine     | High   | 32 | 12 | 18  | 10 | 419  | 48    | 5.92  | 347   | 103.1 | 107.4 | 98.8  | 95.1  | 98    | 97.6  |
| Q8BTM8 | <i>Flna</i>      | Filamin-A         | High   | 24 | 44 | 50  | 42 | 2647 | 281   | 6.04  | 816   | 120.1 | 101.9 | 143.4 | 75.7  | 77.5  | 81.4  |
| Q61559 | <i>Fcgrt</i>     | IgG receptor      | Medium | 3  | 1  | 1   | 1  | 365  | 40.1  | 5.29  | 24    |       |       |       |       |       |       |
| Q8C111 | <i>Gnl3</i>      | Guanine           | High   | 4  | 2  | 2   | 1  | 538  | 60.7  | 9.11  | 33    |       |       |       |       |       |       |
| Q9Z2D0 | <i>Mtmt9</i>     | Myotubularin-     | High   | 7  | 4  | 4   | 4  | 545  | 62.9  | 6.62  | 62    | 94.8  | 100.1 | 90.2  | 107.2 | 101.1 | 106.6 |
| P51174 | <i>Acadl</i>     | Long-chain        | High   | 26 | 9  | 18  | 9  | 430  | 47.9  | 8.31  | 264   | 103.6 | 99.2  | 112.9 | 94.7  | 95.3  | 94.2  |
| Q922B1 | <i>MacroD1</i>   | ADP-ribose        | High   | 15 | 3  | 3   | 3  | 323  | 35.3  | 8.85  | 41    | 99.2  | 103.4 | 99    | 105.9 | 93.5  | 98.9  |
| P26231 | <i>Ctnna1</i>    | Catenin alpha-1   | High   | 27 | 19 | 28  | 11 | 906  | 100   | 6.23  | 538   | 102.7 | 100.9 | 124.7 | 88.5  | 92.2  | 91    |
| Q69ZS7 | <i>Hbs1l</i>     | HBS1-like         | High   | 11 | 4  | 4   | 4  | 682  | 75.1  | 6.46  | 81    | 95.9  | 102.6 | 91.9  | 103.9 | 99.6  | 106.1 |
| Q99MR8 | <i>Mccc1</i>     | Methylcrotonoyl-  | High   | 16 | 9  | 11  | 9  | 717  | 79.3  | 7.83  | 255   | 95.9  | 97.7  | 102.1 | 100.5 | 103.5 | 100.3 |
| Q99JY9 | <i>Actr3</i>     | Actin-related     | High   | 54 | 18 | 38  | 15 | 418  | 47.3  | 5.88  | 648   | 98.1  | 96.3  | 110.6 | 98.2  | 99    | 97.8  |
| Q8VEK2 | <i>Rhbdd2</i>    | Rhomboid          | Medium | 2  | 1  | 1   | 1  | 361  | 39.1  | 9.48  | 18    | 100.4 | 100.8 | 93.9  | 95.1  | 101.1 | 108.7 |
| P18872 | <i>Gnao1</i>     | Guanine           | High   | 54 | 17 | 105 | 15 | 354  | 40.1  | 5.53  | 1918  | 96.6  | 98.8  | 92.8  | 103.2 | 105.2 | 103.4 |
| Q99M07 | <i>Coa5</i>      | Cytochrome c      | High   | 24 | 1  | 1   | 1  | 74   | 8.4   | 8.7   | 0     |       |       |       |       |       |       |
| Q6IRU2 | <i>Tpm4</i>      | Tropomyosin       | High   | 33 | 8  | 10  | 6  | 248  | 28.5  | 4.68  | 166   | 113.3 | 110.2 | 122.6 | 84.5  | 83.7  | 85.7  |
| Q8BHY8 | <i>Snx14</i>     | Sorting nexin-14  | High   | 2  | 2  | 2   | 2  | 964  | 111.8 | 6.83  | 33    |       |       |       |       |       |       |
| P26339 | <i>Chga</i>      | Chromogranin-A    | High   | 8  | 3  | 5   | 3  | 463  | 51.8  | 4.72  | 66    | 102   | 97.1  | 110.3 | 96.6  | 99.4  | 94.5  |
| Q8BUK6 | <i>Hook3</i>     | Protein Hook      | High   | 26 | 16 | 20  | 16 | 718  | 83.2  | 5.19  | 216   | 98.6  | 101   | 97.7  | 99.4  | 99.8  | 103.5 |
| Q7TPR4 | <i>Actn1</i>     | Alpha-actinin-1   | High   | 56 | 43 | 115 | 25 | 892  | 103   | 5.38  | 2139  | 100.6 | 105.6 | 96.6  | 99.3  | 99.4  | 98.5  |
| Q3UJB9 | <i>Edc4</i>      | Enhancer of       | High   | 12 | 12 | 14  | 12 | 1406 | 152.4 | 5.78  | 289   | 98.8  | 102.1 | 95.5  | 97.7  | 101.4 | 104.5 |
| O89017 | <i>Lgmn</i>      | Legumain          | High   | 15 | 5  | 6   | 5  | 435  | 49.3  | 6.39  | 172   | 134.2 | 101.7 | 158   | 67.3  | 67.1  | 71.7  |
| Q8CH09 | <i>Sugp2</i>     | SURP and G-       | High   | 4  | 4  | 5   | 4  | 1067 | 118   | 8.31  | 86    | 94.8  | 92.4  | 94.4  | 104.8 | 102.1 | 111.4 |
| Q9WUP7 | <i>Uchl5</i>     | Ubiquitin         | High   | 31 | 6  | 7   | 6  | 329  | 37.6  | 5.33  | 127   | 102   | 94.9  | 97.9  | 103.3 | 103.3 | 98.7  |
| Q61102 | <i>Abcb7</i>     | ATP-binding       | High   | 20 | 9  | 9   | 9  | 752  | 82.5  | 9.32  | 268   | 97.7  | 104.6 | 95.6  | 101.2 | 101.7 | 99.2  |
| Q6A065 | <i>Cep170</i>    | Centrosomal       | High   | 21 | 29 | 32  | 27 | 1588 | 174.9 | 7.17  | 416   | 100.4 | 98.4  | 93.4  | 101.5 | 102.6 | 103.7 |
| P63168 | <i>Dynll1</i>    | Dynein light      | High   | 45 | 3  | 10  | 2  | 89   | 10.4  | 7.4   | 204   | 95.1  | 95    | 95.2  | 103.4 | 105.1 | 106.3 |
| O70591 | <i>Pfdn2</i>     | Prefoldin subunit | High   | 55 | 7  | 10  | 7  | 154  | 16.5  | 6.58  | 212   | 101.9 | 101.6 | 101   | 97.7  | 100.1 | 97.8  |
| Q922C1 |                  | Uncharacterized   | Low    | 1  | 1  | 1   | 1  | 641  | 69.2  | 5.85  | 0     | 95.9  | 109.2 | 92.9  | 97.9  | 98.7  | 105.5 |
| Q9DBM2 | <i>Ehhadh</i>    | Peroxisomal       | High   | 2  | 1  | 1   | 1  | 718  | 78.3  | 9.13  | 22    |       |       |       |       |       |       |
| P60603 | <i>Romo1</i>     | Reactive oxygen   | High   | 32 | 2  | 3   | 2  | 79   | 8.2   | 9.33  | 40    | 110.6 | 111.3 | 104.1 | 94.5  | 90.6  | 89    |
| Q9Z0M5 | <i>Lipa</i>      | Lysosomal acid    | Medium | 3  | 1  | 1   | 1  | 397  | 45.3  | 8.07  | 27    | 124.8 | 81.4  | 142.5 | 87.2  | 81.3  | 82.8  |
| P97950 | <i>Rab33a</i>    | Ras-related       | High   | 18 | 4  | 4   | 3  | 237  | 26.5  | 7.88  | 76    | 109.2 | 98.4  | 106.2 | 97.6  | 98.7  | 90    |
| Q9R1V7 | <i>Adam23</i>    | Disintegrin and   | High   | 12 | 8  | 11  | 8  | 829  | 91.5  | 7.68  | 142   | 97.1  | 109.3 | 92.1  | 102.8 | 98.1  | 100.6 |
| Q8VEK3 | <i>Hnmpu</i>     | Heterogeneous     | High   | 36 | 24 | 47  | 24 | 800  | 87.9  | 6.24  | 724   | 100   | 96.1  | 100.5 | 103   | 102.4 | 98.1  |
| P58686 |                  | UPF0184 protein   | Medium | 11 | 1  | 1   | 1  | 83   | 9     | 4.26  | 0     | 93.1  | 104.6 | 106.4 | 92.6  | 92.9  | 110.4 |
| Q8BGC4 | <i>Zadh2</i>     | Prostaglandin     | High   | 20 | 6  | 8   | 6  | 377  | 40.5  | 7.42  | 151   | 106.1 | 106.8 | 119.5 | 88.8  | 90.6  | 88.2  |
| Q9JL04 | <i>Fmn2</i>      | Formin-2          | High   | 12 | 12 | 12  | 12 | 1578 | 167.3 | 5.48  | 185   | 99.4  | 97.4  | 97.7  | 103.7 | 100.4 | 101.4 |
| Q6X893 | <i>Slc44a1</i>   | Choline           | High   | 13 | 7  | 10  | 7  | 653  | 73    | 8.75  | 106   | 98.6  | 108   | 98.4  | 96.7  | 96.3  | 101.9 |
| Q9QYB1 | <i>Clic4</i>     | Chloride          | High   | 35 | 6  | 8   | 6  | 253  | 28.7  | 5.59  | 126   | 101.3 | 105.8 | 114   | 93.9  | 88.5  | 96.5  |
| Q8R035 | <i>Mrpl58</i>    | Peptidyl-tRNA     | High   | 11 | 2  | 2   | 2  | 206  | 23.5  | 10.18 | 60    | 100.1 | 99.2  | 93.8  | 99.3  | 97.6  | 110   |
| Q9D2Q3 | <i>Paat</i>      | ATPase PAAT       | Medium | 4  | 1  | 1   | 1  | 444  | 48.7  | 6.48  | 0     |       |       |       |       |       |       |
| Q99N89 | <i>Mrpl43</i>    | 39S ribosomal     | High   | 6  | 1  | 1   | 1  | 183  | 20.2  | 9.52  | 38    |       |       |       |       |       |       |
| Q8C612 | <i>Sdha2</i>     | Succinate         | High   | 12 | 2  | 2   | 2  | 164  | 19.4  | 6.35  | 26    | 103.6 | 92.1  | 96.4  | 108.1 | 103.9 | 95.8  |
| P61089 | <i>Ube2n</i>     | Ubiquitin-        | High   | 48 | 6  | 17  | 6  | 152  | 17.1  | 6.57  | 302   | 96.2  | 99.5  | 92.4  | 100.5 | 101.9 | 109.5 |
| Q9R1V4 | <i>Adam11</i>    | Disintegrin and   | High   | 11 | 6  | 10  | 6  | 773  | 84.1  | 7.5   | 129   | 90.5  | 95.2  | 94.7  | 102.7 | 108.3 | 108.7 |
| Q8BPU7 | <i>Elmo1</i>     | Engulfment and    | High   | 10 | 7  | 10  | 5  | 727  | 83.9  | 6.28  | 161   | 108   | 103.7 | 96.9  | 94.3  | 98.1  | 99    |
| Q61730 | <i>Il1rap</i>    | Interleukin-1     | High   | 11 | 6  | 6   | 6  | 570  | 65.7  | 7.77  | 72    | 108.8 | 104.9 | 110.4 | 85.2  | 95.6  | 95.2  |
| O55128 | <i>Sap18</i>     | Histone           | High   | 9  | 2  | 2   | 2  | 153  | 17.6  | 9.35  | 35    | 102.2 | 99.4  | 103.1 | 102.3 | 90.2  | 102.7 |
| Q9WVA3 | <i>Bub3</i>      | Mitotic           | High   | 22 | 6  | 6   | 6  | 326  | 36.9  | 6.84  | 82    | 102.3 | 94.9  | 99.4  | 100.5 | 100.3 | 102.5 |
| O35744 | <i>Chil3</i>     | Chitinase-like    | High   | 9  | 3  | 4   | 3  | 398  | 44.4  | 5.69  | 75    | 112.6 | 94    | 157.8 | 74.1  | 75.4  | 86.1  |
| P10711 | <i>Tcea1</i>     | Transcription     | High   | 20 | 5  | 6   | 5  | 301  | 33.9  | 8.38  | 61    | 107.5 | 99.3  | 101.4 | 94.6  | 100.5 | 96.6  |
| Q8CJ67 | <i>Stau2</i>     | Double-stranded   | High   | 5  | 3  | 3   | 2  | 570  | 62.5  | 9.6   | 34    | 93.7  | 108.1 | 92.1  | 99.5  | 102.4 | 104.2 |
| Q9DB27 | <i>Mcts1</i>     | Malignant T-cell- | High   | 24 | 3  | 3   | 3  | 181  | 20.5  | 8.82  | 52    | 97.5  | 96.4  | 97.4  | 103.4 | 99.6  | 105.7 |
| P70205 | <i>Adcyap1r1</i> | Pituitary         | High   | 3  | 2  | 3   | 2  | 496  | 56.6  | 6.52  | 43    | 99.1  | 88.7  | 100.4 | 100.2 | 108.2 | 103.4 |
| P35436 | <i>Grin2a</i>    | Glutamate         | High   | 8  | 8  | 12  | 8  | 1464 | 165.3 | 7.01  | 292   | 94.8  | 98.9  | 87.4  | 103.2 | 105.7 | 109.9 |
| Q01065 | <i>Pde1b</i>     | Calcium/calmod    | High   | 37 | 16 | 22  | 15 | 535  | 61.2  | 5.72  | 250   | 90.2  | 92.7  | 95.6  | 97.7  | 111.3 | 112.4 |

|        |                |                  |        |    |    |    |    |      |       |       |      |       |       |       |       |       |       |
|--------|----------------|------------------|--------|----|----|----|----|------|-------|-------|------|-------|-------|-------|-------|-------|-------|
| Q9JMB8 | <i>Cntn6</i>   | Contactin-6      | Low    | 2  | 1  | 1  | 1  | 1028 | 113.7 | 6.64  | 0    | 91.7  | 93.9  | 101   | 100.6 | 110.5 | 102.3 |
| Q8VCE6 | <i>Nt5m</i>    | 5'(3')-          | High   | 17 | 3  | 4  | 3  | 220  | 25.6  | 8.35  | 96   | 95    | 102   | 82.1  | 107.9 | 102.9 | 110.1 |
| Q91WD4 |                | UPF0415 protein  | High   | 4  | 1  | 1  | 1  | 421  | 46.5  | 6.81  | 66   | 88.4  | 95.7  | 95.2  | 101.5 | 110.1 | 109   |
| Q8R3B1 | <i>Plcd1</i>   | 1-               | High   | 15 | 7  | 7  | 7  | 756  | 85.8  | 6.21  | 89   | 101.1 | 100.6 | 98.6  | 97.7  | 97.3  | 104.7 |
| Q3TPX4 | <i>Exoc5</i>   | Exocyst complex  | High   | 22 | 14 | 16 | 14 | 708  | 81.7  | 6.71  | 276  | 97    | 101.1 | 101.3 | 102.8 | 98.1  | 99.6  |
| Q80TN4 | <i>Dnajc16</i> | DnaJ homolog     | High   | 5  | 3  | 3  | 3  | 772  | 89.1  | 7.55  | 55   | 109   | 81.3  | 98.3  | 82.3  | 113   | 116.1 |
| Q9D0E3 | <i>Lysmd1</i>  | LysM and         | High   | 22 | 4  | 5  | 4  | 226  | 24.8  | 8.92  | 52   | 92.6  | 92.8  | 84.7  | 111.9 | 111.3 | 106.6 |
| Q80UG2 | <i>Plxna4</i>  | Plexin-A4        | High   | 17 | 26 | 34 | 20 | 1893 | 212.4 | 6.83  | 635  | 96.2  | 98    | 95.5  | 100.4 | 103   | 106.9 |
| P62245 | <i>Rps15a</i>  | 40S ribosomal    | High   | 57 | 7  | 13 | 7  | 130  | 14.8  | 10.13 | 217  | 102   | 101.2 | 103.8 | 96    | 96.5  | 100.6 |
| Q9JM52 | <i>Mink1</i>   | Misshapen-like   | High   | 16 | 18 | 22 | 12 | 1308 | 147.2 | 7.44  | 164  | 95.9  | 97.8  | 91.4  | 103.9 | 106.1 | 104.9 |
| Q571H0 | <i>Urb1</i>    | Nucleolar pre-   | Medium | 0  | 1  | 1  | 1  | 2274 | 254.5 | 6.96  | 0    |       |       |       |       |       |       |
| Q14CH0 | <i>Fam171b</i> | Protein          | High   | 5  | 4  | 5  | 4  | 825  | 92    | 8.37  | 76   | 95.8  | 102   | 94.1  | 99.5  | 104.5 | 104.1 |
| Q99M51 | <i>Nck1</i>    | Cytoplasmic      | High   | 18 | 7  | 7  | 5  | 377  | 42.9  | 6.47  | 73   | 97.9  | 98.1  | 97.7  | 100   | 100.8 | 105.7 |
| P52332 | <i>Jak1</i>    | Tyrosine-protein | High   | 1  | 1  | 1  | 1  | 1153 | 133.3 | 7.59  | 42   | 107.5 | 103.1 | 116.1 | 87.8  | 93.9  | 91.7  |
| Q9WUK2 | <i>Eif4h</i>   | Eukaryotic       | High   | 37 | 9  | 17 | 9  | 248  | 27.3  | 7.23  | 339  | 91.9  | 96.7  | 93    | 102.9 | 107.1 | 108.4 |
| Q9CY58 | <i>Serbp1</i>  | Plasminogen      | High   | 40 | 15 | 21 | 15 | 407  | 44.7  | 8.54  | 318  | 100.7 | 100.4 | 101.8 | 102.3 | 99.3  | 95.6  |
| P70460 | <i>Vasp</i>    | Vasodilator-     | High   | 11 | 3  | 3  | 3  | 375  | 39.6  | 8.53  | 23   | 125.9 | 99.4  | 131.1 | 80.4  | 81.6  | 81.6  |
| Q3TZZ7 | <i>Esyt2</i>   | Extended         | High   | 10 | 6  | 10 | 6  | 845  | 94.1  | 7.75  | 196  | 96.7  | 100.1 | 97.5  | 99.6  | 103.6 | 102.5 |
| P42866 | <i>Oprm1</i>   | Mu-type opioid   | Low    | 2  | 1  | 1  | 1  | 398  | 44.4  | 8.25  | 18   |       |       |       |       |       |       |
| Q3TDN2 | <i>Faf2</i>    | FAS-associated   | High   | 12 | 4  | 6  | 4  | 445  | 52.4  | 5.47  | 123  | 96.2  | 94.2  | 103.3 | 100.9 | 102.7 | 102.6 |
| Q08642 | <i>Padi2</i>   | Protein-arginine | High   | 15 | 9  | 13 | 9  | 673  | 76.2  | 5.53  | 175  | 97.6  | 110.6 | 106.5 | 92.1  | 94.5  | 98.7  |
| Q3V3R4 | <i>Itga1</i>   | Integrin alpha-1 | High   | 2  | 1  | 1  | 1  | 1179 | 130.7 | 6.2   | 59   | 101.5 | 100.3 | 108.5 | 94.3  | 96.6  | 98.7  |
| Q64516 | <i>Gk</i>      | Glycerol kinase  | High   | 36 | 18 | 21 | 17 | 559  | 61.2  | 5.87  | 328  | 98.5  | 102   | 98.9  | 105.3 | 96.1  | 99.1  |
| Q68FE6 | <i>Ripor1</i>  | Rho family-      | High   | 5  | 6  | 8  | 6  | 1223 | 132.3 | 5.88  | 114  | 95.8  | 96.3  | 98.6  | 104.3 | 102.6 | 102.4 |
| O70354 | <i>Ca11</i>    | Carbonic         | Medium | 3  | 1  | 1  | 1  | 328  | 36    | 9.48  | 0    | 93.7  | 122.8 | 99.4  | 95.2  | 84.9  | 103.9 |
| P16125 | <i>Ldhd</i>    | L-lactate        | High   | 49 | 18 | 91 | 17 | 334  | 36.5  | 6.05  | 1708 | 97.1  | 106.1 | 86.7  | 104.9 | 104   | 101.2 |
| Q9ZOL0 | <i>Tpbp</i>    | Trophoblast      | High   | 7  | 2  | 2  | 2  | 426  | 46.4  | 6.83  | 25   | 95.5  | 98.1  | 109   | 104.5 | 99.9  | 93.1  |
| P63163 | <i>Snrpn</i>   | Small nuclear    | High   | 22 | 5  | 6  | 5  | 240  | 24.6  | 11.19 | 55   | 102.9 | 101.4 | 107.2 | 103.3 | 93.2  | 91.9  |
| P08752 | <i>Gnai2</i>   | Guanine          | High   | 48 | 12 | 33 | 8  | 355  | 40.5  | 5.45  | 793  | 102.4 | 99.7  | 105.6 | 99.3  | 94    | 98.9  |
| Q78ZA7 | <i>Nap114</i>  | Nucleosome       | High   | 35 | 10 | 19 | 9  | 375  | 42.7  | 4.67  | 359  | 100.8 | 99.8  | 99.7  | 97.5  | 102.3 | 99.8  |
| Q9D0L4 | <i>Adck1</i>   | AarF domain-     | High   | 8  | 3  | 3  | 3  | 525  | 59.7  | 8.05  | 86   | 100.6 | 97.1  | 87.4  | 102   | 110.2 | 102.7 |
| Q9QXC1 | <i>Fetub</i>   | Fetuin-B         | High   | 2  | 1  | 2  | 1  | 388  | 42.7  | 6.61  | 47   | 161.9 | 74.6  | 180.9 | 57.9  | 63.2  | 61.6  |
| Q6ZWM4 | <i>Lsm8</i>    | U6 snRNA-        | High   | 34 | 3  | 3  | 3  | 96   | 10.4  | 4.48  | 95   | 93.3  | 97    | 92.6  | 108.4 | 100.4 | 108.3 |
| Q99PV5 | <i>Bhlhe41</i> | Class E basic    | Low    | 3  | 1  | 1  | 1  | 410  | 43.9  | 7.96  | 0    |       |       |       |       |       |       |
| Q99MN9 | <i>Pccb</i>    | Propionyl-CoA    | High   | 44 | 17 | 23 | 17 | 541  | 58.4  | 7.66  | 362  | 94    | 99.8  | 98.3  | 100.1 | 103.6 | 104.2 |
| Q03717 | <i>Kcnb1</i>   | Potassium        | High   | 5  | 4  | 4  | 3  | 857  | 95.5  | 8.16  | 74   | 93.9  | 104.5 | 91.1  | 103.9 | 102.7 | 104   |
| Q62442 | <i>Vamp1</i>   | Vesicle-         | High   | 34 | 4  | 9  | 3  | 118  | 12.9  | 6.65  | 212  | 99.5  | 107.3 | 97.9  | 94.1  | 101.5 | 99.7  |
| Q99ME9 | <i>Gtpbp4</i>  | Nucleolar GTP-   | Medium | 2  | 1  | 1  | 1  | 634  | 74.1  | 9.52  | 27   | 103.7 | 97.1  | 122.3 | 97.3  | 85    | 94.6  |
| Q9D0I4 | <i>Stx17</i>   | Syntaxin-17      | High   | 8  | 2  | 2  | 2  | 301  | 33.2  | 6.74  | 32   | 91.3  | 101.8 | 104.1 | 99.5  | 106.2 | 97.1  |
| P84309 | <i>Adcy5</i>   | Adenylate        | High   | 8  | 8  | 8  | 8  | 1262 | 139   | 7.06  | 50   | 89.8  | 99.8  | 99.7  | 100   | 103.4 | 107.3 |
| Q9CXY9 | <i>Pigk</i>    | GPI-anchor       | High   | 13 | 4  | 4  | 4  | 395  | 44.9  | 6.54  | 96   | 109   | 95.8  | 118.6 | 90.3  | 97.4  | 88.9  |
| Q11136 | <i>Pepd</i>    | Xaa-Pro          | High   | 12 | 5  | 7  | 5  | 493  | 55    | 5.78  | 156  | 98.4  | 99    | 99.6  | 102.5 | 103   | 97.5  |
| Q8C4G9 | <i>Adgra1</i>  | Adhesion G       | Low    | 2  | 1  | 1  | 1  | 578  | 63.5  | 7.43  | 0    |       |       |       |       |       |       |
| Q8JZX4 | <i>Rbm17</i>   | Splicing factor  | High   | 11 | 4  | 4  | 4  | 405  | 45.3  | 5.82  | 101  | 99.9  | 100.3 | 99.7  | 101.5 | 100.2 | 98.3  |
| Q9Z2D1 | <i>Mtmr2</i>   | Myotubularin-    | High   | 5  | 3  | 3  | 3  | 643  | 73.2  | 7.25  | 70   | 96    | 101.5 | 89.8  | 102   | 104.1 | 106.6 |
| Q91VM5 | <i>Rbmx11</i>  | RNA binding      | High   | 39 | 17 | 29 | 5  | 388  | 42.1  | 9.99  | 355  | 89.8  | 96    | 100.4 | 108.2 | 106.2 | 99.6  |
| Q9D6R2 | <i>Idh3a</i>   | Isocitrate       | High   | 39 | 15 | 51 | 15 | 366  | 39.6  | 6.73  | 789  | 95.2  | 104.9 | 89    | 104.8 | 104.1 | 102   |
| Q8R1F6 | <i>Hid1</i>    | Protein HID1     | High   | 11 | 8  | 10 | 8  | 788  | 88.7  | 5.94  | 110  | 99.8  | 98.7  | 92.9  | 105.9 | 97.7  | 105   |
| Q9D832 | <i>Dnajb4</i>  | DnaJ homolog     | High   | 36 | 11 | 16 | 10 | 337  | 37.8  | 8.59  | 232  | 94.4  | 97.4  | 95    | 98.3  | 100.6 | 114.4 |
| Q8BH66 | <i>Atf1</i>    | Atlastin-1       | High   | 43 | 20 | 36 | 18 | 558  | 63.3  | 6.49  | 506  | 97.4  | 101.2 | 92.3  | 103.5 | 103.5 | 102.1 |
| Q9ROA1 | <i>Clcn2</i>   | Chloride channel | High   | 4  | 2  | 2  | 2  | 908  | 99.4  | 8.56  | 82   | 121   | 87.8  | 126.5 | 81.7  | 83    | 100   |
| P63040 | <i>Cplx1</i>   | Complexin-1      | High   | 57 | 6  | 26 | 4  | 134  | 15.1  | 4.97  | 301  | 97.2  | 100.9 | 84.8  | 107.1 | 107.5 | 102.5 |
| Q925I1 | <i>Atad3</i>   | ATPase family    | High   | 30 | 15 | 20 | 15 | 591  | 66.7  | 9.29  | 382  | 95.5  | 101.6 | 90.7  | 106.2 | 103.5 | 102.5 |
| Q9DAX9 | <i>Appbp2</i>  | Amyloid protein- | Low    | 2  | 1  | 1  | 1  | 585  | 66.8  | 6.9   | 14   | 91.9  | 94.3  | 105.1 | 112.5 | 96.5  | 99.7  |
| Q5EBG8 |                | Uncharacterized  | High   | 8  | 1  | 1  | 1  | 199  | 21.8  | 5.53  | 53   | 92.2  | 98.7  | 105.9 | 103.9 | 100.4 | 98.9  |
| P80318 | <i>Cct3</i>    | T-complex        | High   | 52 | 27 | 55 | 27 | 545  | 60.6  | 6.7   | 1060 | 99.5  | 98.2  | 103.2 | 98.2  | 100.6 | 100.3 |
| P62196 | <i>Psmc5</i>   | 26S proteasome   | High   | 52 | 20 | 30 | 19 | 406  | 45.6  | 7.55  | 675  | 99.6  | 100   | 99.1  | 99.4  | 102.3 | 99.7  |
| Q3THK7 | <i>Gmps</i>    | GMP synthase     | High   | 46 | 25 | 29 | 25 | 693  | 76.7  | 6.73  | 516  | 98.2  | 98.3  | 98.9  | 99.7  | 101.2 | 103.7 |
| Q68FH0 | <i>Pkp4</i>    | Plakophilin-4    | High   | 13 | 13 | 13 | 11 | 1190 | 131.5 | 8.94  | 190  | 99.2  | 97.7  | 95.5  | 97.5  | 100.9 | 109.1 |
| Q91V61 | <i>Sfxn3</i>   | Sideroflexin-3   | High   | 40 | 11 | 25 | 10 | 321  | 35.4  | 9.51  | 576  | 97.6  | 98.3  | 96.1  | 102.6 | 102.9 | 102.5 |
| Q9CXP8 | <i>Gng10</i>   | Guanine          | High   | 38 | 2  | 3  | 2  | 68   | 7.2   | 7.85  | 114  | 87.1  | 102.9 | 97    | 101.1 | 107.7 | 104.2 |
| Q5PR69 | <i>Crad</i>    | Capping protein  | High   | 2  | 1  | 1  | 1  | 1207 | 132.2 | 5.4   | 48   | 95.8  | 87.8  | 90.7  | 114.7 | 105.5 | 105.6 |
| P62500 | <i>Tsc22d1</i> | TSC22 domain     | High   | 6  | 5  | 8  | 3  | 1077 | 109.7 | 5.83  | 184  | 97.2  | 97.5  | 88.6  | 101.4 | 108.2 | 107   |
| P10493 | <i>Nid1</i>    | Nidogen-1        | High   | 7  | 8  | 8  | 8  | 1245 | 136.5 | 5.44  | 87   | 97.4  | 102.5 | 98.1  | 97.4  | 100.6 | 103.9 |
| P08414 | <i>Camk4</i>   | Calcium/calmod   | High   | 27 | 11 | 22 | 11 | 469  | 52.6  | 4.93  | 234  | 90.4  | 100.5 | 77.3  | 109.5 | 113   | 109.3 |
| Q80WT0 | <i>Jph4</i>    | Junctophilin-4   | High   | 4  | 3  | 3  | 3  | 628  | 66    | 6.71  | 30   | 99.4  | 104.8 | 92.6  | 101.8 | 99.3  | 102.1 |
| Q80X95 | <i>Rraga</i>   | Ras-related      | High   | 16 | 4  | 5  | 2  | 313  | 36.5  | 7.72  | 104  | 95    | 94    | 95.6  | 105.1 | 101.1 | 109.1 |
| Q9Z0U1 | <i>Tjp2</i>    | Tight junction   | High   | 8  | 9  | 12 | 9  | 1167 | 131.2 | 6.79  | 190  | 100.7 | 106.9 | 104.1 | 92.5  | 95.9  | 100   |

|        |                 |                    |        |    |    |     |    |      |       |       |      |       |       |       |       |       |       |
|--------|-----------------|--------------------|--------|----|----|-----|----|------|-------|-------|------|-------|-------|-------|-------|-------|-------|
| O35344 | <i>Kpna3</i>    | Importin subunit   | High   | 16 | 7  | 11  | 4  | 521  | 57.7  | 4.94  | 237  | 104   | 98.6  | 108.3 | 94    | 96.5  | 98.6  |
| Q3U0D9 | <i>Hace1</i>    | E3 ubiquitin-      | High   | 7  | 5  | 6   | 5  | 909  | 102   | 5.76  | 71   | 82.8  | 102.9 | 91.2  | 108.6 | 103.7 | 110.8 |
| Q9D8Y7 | <i>Tnfrsf82</i> | Tumor necrosis     | Low    | 4  | 1  | 1   | 1  | 184  | 20.6  | 7.96  | 0    |       |       |       |       |       |       |
| Q02053 | <i>Uba1</i>     | Ubiquitin-like     | High   | 48 | 38 | 90  | 38 | 1058 | 117.7 | 5.66  | 2111 | 99.2  | 98.8  | 99    | 100   | 101   | 102   |
| O09167 | <i>Rpl21</i>    | 60S ribosomal      | High   | 39 | 6  | 9   | 6  | 160  | 18.6  | 10.49 | 49   | 104.9 | 98.8  | 105.8 | 101.2 | 93    | 96.4  |
| Q8BU30 | <i>Iars1</i>    | Isoleucine-tRNA    | High   | 22 | 24 | 29  | 24 | 1262 | 144.2 | 6.55  | 279  | 99.2  | 99.9  | 97.1  | 102.7 | 100.2 | 100.8 |
| Q6PD19 | <i>Armh3</i>    | Armadillo-like     | High   | 5  | 3  | 3   | 3  | 689  | 78.6  | 6.6   | 0    | 99.8  | 98.9  | 98.7  | 96.7  | 104.6 | 101.2 |
| Q9Z1G3 | <i>Atp6v1c1</i> | V-type proton      | High   | 58 | 24 | 52  | 24 | 382  | 43.9  | 7.46  | 1211 | 96.9  | 98.7  | 92.4  | 105.1 | 104.3 | 102.7 |
| P05480 | <i>Src</i>      | Neuronal proto-    | High   | 37 | 15 | 18  | 12 | 541  | 60.6  | 7.84  | 229  | 98.3  | 99.3  | 96.2  | 102.5 | 101.6 | 102.2 |
| P97471 | <i>Smad4</i>    | Mothers against    | High   | 4  | 1  | 1   | 1  | 551  | 60.3  | 6.99  | 43   | 101.4 | 96.8  | 95.6  | 98.3  | 109.1 | 98.9  |
| Q8QZS1 | <i>Hibch</i>    | 3-                 | High   | 30 | 10 | 14  | 10 | 385  | 43    | 8.06  | 209  | 102.6 | 108.1 | 101.1 | 96.3  | 96.4  | 95.4  |
| Q62178 | <i>Sema4a</i>   | Semaphorin-4A      | High   | 9  | 5  | 6   | 5  | 760  | 83.4  | 7.72  | 76   | 104.8 | 104.9 | 112.6 | 94.7  | 91    | 92.1  |
| Q9CPW0 | <i>Cntnap2</i>  | Contactin-         | High   | 10 | 13 | 18  | 13 | 1332 | 148.1 | 6.77  | 289  | 101.2 | 109   | 90.3  | 101.6 | 98.7  | 99.2  |
| Q91XY4 | <i>Pcdhga4</i>  | Protocadherin      | High   | 2  | 1  | 1   | 1  | 930  | 100.3 | 4.87  | 29   | 101.5 | 99.2  | 110.3 | 91.4  | 102.6 | 94.9  |
| Q8R1A4 | <i>Dock7</i>    | Dedicator of       | High   | 3  | 5  | 6   | 5  | 2130 | 241.3 | 6.71  | 68   | 102.7 | 101.4 | 98.2  | 100.8 | 97.4  | 99.6  |
| P13595 | <i>Ncam1</i>    | Neural cell        | High   | 43 | 36 | 114 | 36 | 1115 | 119.4 | 4.83  | 2109 | 92.5  | 91.7  | 90    | 106.9 | 110   | 109   |
| P47911 | <i>Rpl6</i>     | 60S ribosomal      | High   | 37 | 12 | 20  | 12 | 296  | 33.5  | 10.7  | 351  | 101.5 | 97.7  | 103.6 | 101.4 | 97.9  | 98    |
| Q9DC07 | <i>Nabl</i>     | LIM zinc-binding   | High   | 57 | 14 | 18  | 13 | 270  | 31.1  | 8.31  | 219  | 99.3  | 102   | 103.5 | 98.8  | 99.1  | 97.3  |
| Q8BXA0 | <i>Lrfn5</i>    | Leucine-rich       | High   | 3  | 2  | 2   | 2  | 719  | 79.3  | 7.24  | 35   | 101.3 | 103.2 | 89.2  | 102.1 | 103.2 | 100.9 |
| Q80UW8 | <i>Polr2e</i>   | DNA-directed       | High   | 8  | 1  | 1   | 1  | 210  | 24.6  | 5.95  | 50   | 98.7  | 90.7  | 102.1 | 103.8 | 106.8 | 97.9  |
| Q921C5 | <i>Bicd2</i>    | Protein bicaudal   | Medium | 1  | 1  | 1   | 1  | 820  | 93.3  | 5.44  | 15   |       |       |       |       |       |       |
| Q64442 | <i>Sord</i>     | Sorbitol           | High   | 18 | 6  | 8   | 6  | 357  | 38.2  | 7.02  | 180  | 96.6  | 100.1 | 92.2  | 95.7  | 95    | 120.4 |
| Q9JM63 | <i>Kcnj10</i>   | ATP-sensitive      | High   | 6  | 2  | 2   | 2  | 379  | 42.4  | 8.29  | 46   | 122.5 | 118.8 | 106.9 | 82.2  | 84.9  | 84.7  |
| Q8BGT7 | <i>Smndc1</i>   | Survival of motor  | High   | 5  | 1  | 1   | 1  | 238  | 26.7  | 7.24  | 28   | 99.4  | 91.6  | 97    | 107.2 | 100.7 | 104.1 |
| P68040 | <i>Rack1</i>    | Receptor of        | High   | 42 | 11 | 22  | 11 | 317  | 35.1  | 7.69  | 435  | 102.7 | 99    | 104.7 | 97.3  | 98.9  | 97.4  |
| P70313 | <i>Nos3</i>     | Nitric oxide       | High   | 1  | 1  | 1   | 1  | 1202 | 132.8 | 7.02  | 41   | 96.1  | 96.4  | 101.9 | 101.7 | 100.3 | 103.6 |
| Q8BM72 | <i>Hspa13</i>   | Heat shock 70      | High   | 8  | 3  | 3   | 3  | 471  | 51.7  | 5.63  | 39   | 94.5  | 101.7 | 101.4 | 97.7  | 100.2 | 104.5 |
| O88492 | <i>Plin4</i>    | Perilipin-4        | High   | 4  | 1  | 1   | 1  | 1403 | 139.3 | 8.59  | 36   |       |       |       |       |       |       |
| P99028 | <i>Uqcrh</i>    | Cytochrome b-c1    | High   | 74 | 5  | 10  | 5  | 89   | 10.4  | 4.87  | 150  | 95.3  | 97.1  | 105.1 | 104.6 | 96.5  | 101.5 |
| Q9WUM3 | <i>Coro1b</i>   | Coronin-1B         | High   | 20 | 10 | 15  | 10 | 484  | 53.9  | 5.78  | 200  | 97.2  | 103.9 | 102.3 | 101.9 | 95.5  | 99.2  |
| Q9WTM5 | <i>Ruvb12</i>   | RuvB-like 2        | High   | 33 | 12 | 18  | 12 | 463  | 51.1  | 5.64  | 353  | 96.7  | 101.5 | 97.4  | 98.7  | 103.8 | 101.8 |
| O09159 | <i>Man2b1</i>   | Lysosomal          | High   | 2  | 2  | 2   | 2  | 1013 | 114.6 | 8.13  | 17   | 111.7 | 101.5 | 122.2 | 87.9  | 86.5  | 90.3  |
| Q62407 | <i>Speg</i>     | Striated muscle-   | High   | 1  | 2  | 2   | 2  | 3262 | 354.1 | 8.21  | 25   | 102.1 | 85.3  | 101.1 | 102.2 | 116.5 | 92.7  |
| Q9Z2W1 | <i>Stk25</i>    | Serine/threonine   | High   | 13 | 5  | 9   | 1  | 426  | 48.1  | 6.81  | 159  | 95    | 93.2  | 108   | 97.3  | 107.8 | 98.7  |
| Q99K10 | <i>Nlgn1</i>    | Neuroigin-1        | High   | 8  | 5  | 6   | 2  | 843  | 94.1  | 5.99  | 103  |       |       |       |       |       |       |
| Q9D920 | <i>Borcs5</i>   | BLOC-1-related     | High   | 11 | 2  | 3   | 2  | 195  | 22.1  | 6.55  | 28   | 98    | 101.1 | 104.7 | 95.8  | 100.3 | 100.1 |
| Q91YJ3 | <i>Thyn1</i>    | Thymocyte          | Medium | 4  | 1  | 2   | 1  | 226  | 26.2  | 9.11  | 25   | 95.3  | 99.2  | 105.7 | 98.1  | 102.9 | 98.9  |
| Q3UGC7 | <i>Eif3j1</i>   | Eukaryotic         | High   | 47 | 11 | 14  | 11 | 261  | 29.3  | 4.81  | 215  | 97.2  | 100.4 | 97.6  | 98.4  | 98.7  | 107.7 |
| Q64487 | <i>Ptprd</i>    | Receptor-type      | High   | 19 | 25 | 39  | 17 | 1912 | 214.3 | 6.55  | 660  | 97.8  | 102.9 | 89    | 106.5 | 101.8 | 102.1 |
| Q8BH35 | <i>C8b</i>      | Complement         | High   | 19 | 9  | 9   | 9  | 589  | 66.2  | 7.77  | 177  | 161.8 | 76.6  | 190.6 | 51.9  | 58    | 61.1  |
| Q3TIX9 | <i>Usp39</i>    | U4/U6.U5 tri-      | High   | 10 | 4  | 5   | 4  | 564  | 65.1  | 8.9   | 84   | 96.9  | 97.8  | 106.7 | 98    | 98.7  | 102   |
| P01801 |                 | Ig heavy chain     | High   | 14 | 1  | 1   | 1  | 115  | 12.8  | 7.12  | 58   | 144.4 | 73.7  | 182.5 | 63.1  | 69.7  | 66.5  |
| Q6Y7W8 | <i>Gigyf2</i>   | GRB10-             | High   | 5  | 4  | 5   | 4  | 1291 | 149.1 | 5.57  | 64   | 91.7  | 99.8  | 95.5  | 100.2 | 106.3 | 106.5 |
| Q8BVY0 | <i>Rsl1d1</i>   | Ribosomal L1       | Medium | 3  | 1  | 1   | 1  | 452  | 50.4  | 9.98  | 0    |       |       |       |       |       |       |
| Q8BZH4 | <i>Pogz</i>     | Pogo               | High   | 1  | 1  | 1   | 1  | 1409 | 154.8 | 7.52  | 17   |       |       |       |       |       |       |
| Q9Z0V2 | <i>Kcnd2</i>    | Potassium          | High   | 12 | 5  | 5   | 5  | 630  | 70.5  | 8.07  | 93   | 89.1  | 93.4  | 94.7  | 102.9 | 106.9 | 113   |
| Q3TDQ1 | <i>Stt3b</i>    | Dolichyl-          | High   | 6  | 5  | 6   | 5  | 823  | 93.2  | 8.95  | 41   | 94.1  | 97.1  | 100.1 | 103.1 | 99.9  | 105.8 |
| Q8VHL0 | <i>Slc14a1</i>  | Urea transporter   | Medium | 2  | 1  | 1   | 1  | 384  | 42.1  | 7.9   | 19   | 121.6 | 115.2 | 144.3 | 68.2  | 71.9  | 78.8  |
| Q6PGN3 | <i>Dclk2</i>    | Serine/threonine   | High   | 21 | 13 | 17  | 12 | 756  | 82.9  | 8.44  | 257  | 92.5  | 93.5  | 100.4 | 103.4 | 105.6 | 104.7 |
| P48428 | <i>Tbca</i>     | Tubulin-specific   | High   | 6  | 1  | 2   | 1  | 108  | 12.8  | 5.27  | 24   | 115   | 105.4 | 127.3 | 80.4  | 84.5  | 87.3  |
| O54983 | <i>Crym</i>     | Ketimine           | High   | 42 | 12 | 31  | 12 | 313  | 33.5  | 5.67  | 515  | 88.9  | 86.2  | 105   | 92    | 113.1 | 114.8 |
| Q8BWZ3 | <i>Naa25</i>    | N-alpha-           | High   | 3  | 3  | 3   | 3  | 972  | 111.6 | 6.52  | 59   | 97.6  | 103.1 | 95.5  | 104.5 | 97    | 102.3 |
| O88384 | <i>Vti1b</i>    | Vesicle transport  | High   | 19 | 4  | 5   | 4  | 232  | 26.7  | 8.79  | 100  | 99.2  | 99.2  | 98.5  | 100.1 | 105.3 | 97.7  |
| Q9Z1T6 | <i>Pikfyve</i>  | 1-                 | High   | 2  | 4  | 4   | 4  | 2097 | 236.7 | 6.68  | 28   | 97    | 98.7  | 105   | 95.6  | 101.2 | 102.4 |
| Q8C080 | <i>Snx16</i>    | Sorting nexin-16   | High   | 3  | 1  | 2   | 1  | 344  | 38.8  | 5.21  | 68   | 101.3 | 100.2 | 92.6  | 102.3 | 100.9 | 102.6 |
| Q8K353 | <i>Cystm1</i>   | Cysteine-rich      | High   | 10 | 1  | 1   | 1  | 104  | 11.4  | 4.32  | 43   | 97.7  | 101.6 | 85.3  | 102.1 | 106.1 | 107.2 |
| P57776 | <i>Eef1d</i>    | Elongation factor  | High   | 37 | 8  | 15  | 8  | 281  | 31.3  | 5.02  | 339  | 105.3 | 100.2 | 108.6 | 94.2  | 94.9  | 96.8  |
| P42567 | <i>Eps15</i>    | Epidermal          | High   | 12 | 9  | 11  | 9  | 897  | 98.4  | 4.6   | 203  | 98.5  | 102.1 | 102.1 | 98.8  | 100.4 | 98.1  |
| Q99K51 | <i>Pls3</i>     | Plastin-3          | High   | 29 | 17 | 27  | 11 | 630  | 70.7  | 5.62  | 476  | 95    | 101.4 | 98.3  | 101.8 | 100.2 | 103.3 |
| O35954 | <i>Pitpnm1</i>  | Membrane-          | High   | 18 | 17 | 24  | 17 | 1243 | 134.9 | 6.06  | 290  | 96.7  | 96.6  | 94.3  | 104.6 | 102.1 | 105.8 |
| Q922U2 | <i>Krt5</i>     | Keratin, type II   | High   | 9  | 8  | 11  | 5  | 580  | 61.7  | 7.75  | 134  | 84.1  | 108.7 | 89.1  | 136.2 | 77.4  | 104.5 |
| Q9Z0M6 | <i>Adgre5</i>   | Adhesion G         | Low    | 2  | 1  | 1   | 1  | 818  | 90.4  | 7.39  | 0    |       |       |       |       |       |       |
| P16330 | <i>Cnp</i>      | 2',3'-cyclic-      | High   | 59 | 27 | 96  | 27 | 420  | 47.1  | 8.97  | 1640 | 94.3  | 120.8 | 96.4  | 94.8  | 96    | 97.8  |
| Q8VCF1 | <i>Cant1</i>    | Soluble calcium-   | Medium | 3  | 1  | 1   | 1  | 403  | 45.6  | 6.77  | 0    |       |       |       |       |       |       |
| P23780 | <i>Glb1</i>     | Beta-              | High   | 2  | 1  | 2   | 1  | 647  | 73.1  | 7.47  | 48   | 100   | 94.9  | 97.1  | 96.8  | 108.5 | 102.7 |
| Q9DCJ5 | <i>Ndufa8</i>   | NADH               | High   | 51 | 8  | 17  | 8  | 172  | 20    | 8.46  | 145  | 93.7  | 101.7 | 90.6  | 101.2 | 95.6  | 117.2 |
| P08003 | <i>Pdia4</i>    | Protein disulfide- | High   | 41 | 24 | 45  | 24 | 638  | 71.9  | 5.31  | 628  | 108.8 | 105.3 | 124.3 | 85.3  | 88.6  | 87.7  |
| Q91W86 | <i>Vps11</i>    | Vacuolar protein   | High   | 7  | 7  | 7   | 7  | 941  | 107.7 | 7.01  | 112  | 99.1  | 100.5 | 96.5  | 98.2  | 102.8 | 103.1 |

|        |                 |                   |        |    |    |    |    |      |       |      |      |       |       |       |       |       |       |
|--------|-----------------|-------------------|--------|----|----|----|----|------|-------|------|------|-------|-------|-------|-------|-------|-------|
| Q8K3A0 | <i>Hscb</i>     | Iron-sulfur       | High   | 31 | 5  | 5  | 5  | 234  | 26.6  | 7.37 | 111  | 97.2  | 103   | 100.6 | 92.9  | 102.3 | 104   |
| Q8JZX9 | <i>Cdc42ep2</i> | Cdc42 effector    | Medium | 5  | 1  | 1  | 1  | 214  | 23    | 5.54 | 34   |       |       |       |       |       |       |
| O08580 | <i>Esrra</i>    | Steroid hormone   | Low    | 3  | 1  | 1  | 1  | 422  | 45.4  | 6.38 | 0    | 114.6 | 85.4  | 88.2  | 115.1 | 93.3  | 103.4 |
| Q6PFD5 | <i>Dlgap3</i>   | Disks large-      | High   | 18 | 15 | 22 | 15 | 977  | 105.8 | 8.76 | 269  | 97.1  | 100.8 | 87.5  | 108.4 | 103   | 103.3 |
| B1AR13 | <i>Cisd3</i>    | CDGSH iron-       | High   | 27 | 4  | 4  | 4  | 137  | 15.7  | 9.79 | 34   | 98.2  | 107   | 97.3  | 101.2 | 97.6  | 98.8  |
| Q9JHG6 | <i>Rcan1</i>    | Calcipressin-1    | High   | 20 | 4  | 5  | 4  | 251  | 28.1  | 5.41 | 105  | 103.3 | 96.1  | 102   | 101.3 | 99.6  | 97.8  |
| Q3UFY8 | <i>Trmt10c</i>  | tRNA              | High   | 4  | 1  | 1  | 1  | 414  | 48.4  | 9.38 | 56   | 94.2  | 111   | 100.4 | 97.2  | 98.8  | 98.4  |
| Q9Z2W0 | <i>Dnpep</i>    | Aspartyl          | High   | 35 | 12 | 13 | 12 | 473  | 52.2  | 7.25 | 228  | 96.8  | 100.6 | 100.8 | 100.1 | 101.1 | 100.6 |
| Q69ZU6 | <i>Thsd7a</i>   | Thrombospondin    | High   | 1  | 1  | 1  | 1  | 1645 | 183.4 | 7.2  | 27   | 101.3 | 100.7 | 97.6  | 92.3  | 103.4 | 104.7 |
| Q8K3G9 | <i>App2</i>     | DCC-interacting   | High   | 16 | 8  | 11 | 8  | 662  | 73.8  | 5.03 | 218  | 100.6 | 102.2 | 104.7 | 93.5  | 94.8  | 104.2 |
| Q9D0F3 | <i>Lman1</i>    | Protein ERGIC-    | High   | 8  | 4  | 4  | 4  | 517  | 57.8  | 6.34 | 103  | 104.3 | 104.6 | 107   | 94    | 97.1  | 93    |
| Q8VD66 | <i>Abhd4</i>    | (Lyso)-N-         | Medium | 4  | 1  | 1  | 1  | 342  | 38.8  | 7.59 | 0    | 99.4  | 102.9 | 102.2 | 101.4 | 104.1 | 89.9  |
| Q7TT15 | <i>Galnt17</i>  | Polypeptide N-    | High   | 2  | 1  | 1  | 1  | 598  | 67.6  | 8.9  | 20   |       |       |       |       |       |       |
| Q9CQY5 | <i>Magt1</i>    | Magnesium         | High   | 5  | 2  | 2  | 1  | 335  | 37.9  | 9.76 | 26   |       |       |       |       |       |       |
| Q9CW79 | <i>Golga1</i>   | Golgin subfamily  | Medium | 1  | 1  | 1  | 1  | 758  | 87.3  | 5.52 | 0    | 95.3  | 99.6  | 96    | 99.4  | 100.1 | 109.6 |
| Q64331 | <i>Myo6</i>     | Unconventional    | High   | 20 | 20 | 24 | 20 | 1265 | 146.3 | 8.85 | 525  | 107.8 | 103   | 116   | 90.2  | 90.3  | 92.6  |
| Q8R2K1 | <i>Fuom</i>     | Fucose            | High   | 23 | 3  | 3  | 3  | 153  | 16.8  | 5.36 | 78   | 101.3 | 100   | 103.3 | 98.2  | 97.9  | 99.4  |
| Q3UVG3 | <i>Fam91a1</i>  | Protein           | High   | 8  | 4  | 5  | 4  | 837  | 93.4  | 6.35 | 80   | 96.5  | 99.4  | 107.9 | 97    | 99.4  | 99.9  |
| Q9JIY5 | <i>Htra2</i>    | Serine protease   | High   | 12 | 4  | 5  | 4  | 458  | 49.3  | 9.6  | 69   | 98.8  | 95.7  | 94.4  | 103.7 | 105.8 | 101.6 |
| Q61500 | <i>Itm2a</i>    | Integral          | Low    | 3  | 1  | 1  | 1  | 263  | 29.7  | 5.72 | 0    | 101.1 | 102.7 | 98.2  | 97.3  | 96    | 104.8 |
| Q9D6I9 | <i>Lurap1</i>   | Leucine rich      | High   | 15 | 2  | 2  | 2  | 239  | 25.8  | 4.72 | 57   | 98.5  | 104.5 | 97.4  | 101.5 | 91.8  | 106.4 |
| Q8CDM8 | <i>Fam160b1</i> | Protein           | High   | 6  | 4  | 4  | 4  | 764  | 86    | 5.25 | 60   | 94.4  | 100.5 | 93.6  | 99.6  | 101.6 | 110.3 |
| Q8VDP6 | <i>Cdipt</i>    | CDP-              | High   | 10 | 2  | 3  | 2  | 213  | 23.6  | 8.27 | 65   | 95.4  | 102.3 | 98.3  | 107.6 | 97.3  | 99.1  |
| Q3TZX8 | <i>Nol9</i>     | Polynucleotide    | High   | 3  | 1  | 1  | 1  | 714  | 80.8  | 9.45 | 37   | 98.8  | 77.8  | 102.3 | 111.5 | 103.9 | 105.7 |
| P61971 | <i>Nutf2</i>    | Nuclear           | High   | 35 | 3  | 5  | 3  | 127  | 14.5  | 5.38 | 101  | 102.4 | 102.9 | 97.1  | 100.3 | 100.8 | 96.5  |
| Q8BMS9 | <i>Rassf2</i>   | Ras association   | High   | 5  | 1  | 1  | 1  | 326  | 37.9  | 7.94 | 44   | 100.7 | 97    | 94.1  | 95    | 92.6  | 120.6 |
| Q64362 | <i>Aktip</i>    | AKT-interacting   | High   | 13 | 2  | 2  | 2  | 292  | 32.9  | 9.31 | 51   | 90.8  | 94.2  | 100.3 | 105.1 | 108.8 | 100.8 |
| Q69ZS6 | <i>Sv2c</i>     | Synaptic vesicle  | High   | 6  | 4  | 7  | 3  | 727  | 82.2  | 5.11 | 115  | 98.1  | 96.9  | 101.8 | 97.1  | 102.7 | 103.4 |
| Q9CZX8 | <i>Rps19</i>    | 40S ribosomal     | High   | 50 | 10 | 18 | 10 | 145  | 16.1  | 10.4 | 385  | 103.4 | 100.7 | 107.2 | 94.5  | 97.6  | 96.7  |
| Q5DTJ9 | <i>Mypn</i>     | Myopalladin       | Medium | 1  | 1  | 2  | 1  | 1315 | 144   | 6.54 | 0    | 102.3 | 106.7 | 85.8  | 99.9  | 106.2 | 99.2  |
| Q9D2R0 | <i>Aacs</i>     | Acetoacetyl-CoA   | High   | 10 | 7  | 7  | 7  | 672  | 75.2  | 6.71 | 53   | 97    | 100.6 | 102.3 | 98.5  | 102.3 | 99.2  |
| E9PZJ8 | <i>Ascc3</i>    | Activating signal | High   | 1  | 1  | 1  | 1  | 2198 | 250.4 | 7.02 | 33   | 93.4  | 107.2 | 107.5 | 96.3  | 93.1  | 102.6 |
| Q9ESE1 | <i>Lrba</i>     | Lipopolysacchari  | High   | 2  | 7  | 8  | 2  | 2856 | 316.9 | 5.69 | 90   | 98.3  | 90.1  | 108.3 | 91.9  | 108.4 | 103.1 |
| Q8BHD7 | <i>Ptbp3</i>    | Polypyrimidine    | High   | 7  | 4  | 4  | 1  | 523  | 56.7  | 9.13 | 69   |       |       |       |       |       |       |
| P15864 | <i>H1-2</i>     | Histone H1.2      | High   | 45 | 12 | 26 | 4  | 212  | 21.3  | 11   | 515  | 108.1 | 95    | 137.4 | 82    | 91.7  | 85.8  |
| P60469 | <i>Ppfia3</i>   | Liprin-alpha-3    | High   | 34 | 35 | 47 | 34 | 1194 | 133.3 | 5.64 | 773  | 93.3  | 97.8  | 90.8  | 105.8 | 105.4 | 106.8 |
| Q9WVA2 | <i>Timm8a1</i>  | Mitochondrial     | High   | 53 | 3  | 5  | 3  | 97   | 11    | 5.16 | 207  | 91.4  | 110   | 93.6  | 103.1 | 99.6  | 102.4 |
| Q5SW19 | <i>Cluh</i>     | Clustered         | High   | 8  | 9  | 12 | 9  | 1315 | 148   | 6.02 | 106  | 97    | 98.9  | 97.1  | 104.5 | 97.6  | 104.9 |
| P70697 | <i>Urod</i>     | Uroporphyrinoge   | High   | 6  | 2  | 2  | 2  | 367  | 40.7  | 6.65 | 69   | 99.6  | 102.5 | 96.3  | 107.4 | 98.2  | 96.1  |
| Q9D3E6 | <i>Stag1</i>    | Cohesin subunit   | Medium | 1  | 1  | 1  | 1  | 1258 | 144.3 | 5.59 | 24   |       |       |       |       |       |       |
| Q6P2K6 | <i>Ppp4r3a</i>  | Serine/threonine  | High   | 2  | 1  | 1  | 1  | 820  | 93.8  | 4.89 | 43   | 44.5  | 57    | 70.4  | 63.4  | 55.2  | 309.6 |
| Q8CGF7 | <i>Tcerg1</i>   | Transcription     | High   | 10 | 10 | 10 | 10 | 1100 | 123.7 | 8.65 | 145  | 100.5 | 95.6  | 100   | 102.7 | 100.8 | 100.4 |
| Q8VHE0 | <i>Sec63</i>    | Translocation     | High   | 11 | 7  | 7  | 7  | 760  | 87.8  | 5.38 | 87   | 102.5 | 106   | 101.6 | 95.3  | 99.9  | 94.6  |
| Q8VHX6 | <i>Finc</i>     | Filamin-C         | High   | 7  | 13 | 18 | 10 | 2726 | 290.9 | 5.95 | 217  | 112.4 | 96.1  | 131.3 | 83.5  | 87.3  | 89.3  |
| Q8BWU3 | <i>Fam131a</i>  | Protein           | High   | 7  | 2  | 2  | 2  | 361  | 39    | 4.7  | 21   | 90.7  | 100   | 95.7  | 102.7 | 98.1  | 112.9 |
| P21614 | <i>Gc</i>       | Vitamin D-        | High   | 28 | 11 | 15 | 11 | 476  | 53.6  | 5.5  | 369  | 171.3 | 67.1  | 218.5 | 47.2  | 48.1  | 47.8  |
| Q8BYK5 | <i>Phactr3</i>  | Phosphatase       | High   | 4  | 2  | 2  | 2  | 558  | 62.6  | 8.31 | 41   | 94    | 103.2 | 94.6  | 104.3 | 104.6 | 99.3  |
| Q9ESN9 | <i>Mapk8ip3</i> | C-Jun-amino-      | High   | 11 | 12 | 13 | 8  | 1337 | 147.5 | 5.45 | 196  | 98.6  | 99.6  | 97.6  | 98.9  | 103.9 | 101.4 |
| P0DN34 | <i>Ndufb1</i>   | NADH              | Medium | 19 | 1  | 1  | 1  | 57   | 7     | 8.21 | 0    | 94.1  | 99.9  | 90.3  | 102.4 | 106.8 | 106.5 |
| P24288 | <i>Bcat1</i>    | Branched-chain-   | High   | 29 | 9  | 14 | 9  | 386  | 42.8  | 5.39 | 281  | 97.6  | 107.8 | 98.1  | 101.2 | 95.5  | 99.8  |
| Q4LDD4 | <i>Arap1</i>    | Arf-GAP with      | High   | 1  | 1  | 1  | 1  | 1452 | 162.2 | 6.18 | 21   | 92.3  | 95.1  | 104.7 | 92    | 110.2 | 105.7 |
| Q64FW2 | <i>Retsat</i>   | All-trans-retinol | Medium | 2  | 1  | 1  | 1  | 609  | 67.3  | 8.95 | 0    |       |       |       |       |       |       |
| Q80U93 | <i>Nup214</i>   | Nuclear pore      | Low    | 1  | 1  | 1  | 1  | 2085 | 212.8 | 7.08 | 0    | 105.2 | 105.8 | 94.3  | 97.8  | 99.8  | 97.1  |
| P08113 | <i>Hsp90b1</i>  | Endoplasmic       | High   | 39 | 32 | 70 | 30 | 802  | 92.4  | 4.82 | 1178 | 106.7 | 101.3 | 115.9 | 90.1  | 94    | 92    |
| P03911 | <i>Mtnd4</i>    | NADH-             | High   | 7  | 3  | 5  | 3  | 459  | 51.8  | 9.38 | 148  | 97.5  | 98.1  | 108.1 | 101.1 | 97.4  | 97.8  |
| Q9DC63 | <i>Fbxo3</i>    | F-box only        | Medium | 4  | 1  | 1  | 1  | 480  | 55.2  | 5.02 | 18   | 84.9  | 90.1  | 90.6  | 113.5 | 112.1 | 108.8 |
| Q8CIA5 | <i>Slc35b4</i>  | UDP-xylose and    | Medium | 3  | 1  | 1  | 1  | 331  | 37.5  | 9.11 | 0    |       |       |       |       |       |       |
| Q91V36 | <i>Nrbp2</i>    | Nuclear           | High   | 11 | 5  | 5  | 5  | 499  | 57.3  | 6.35 | 43   | 96.3  | 107.7 | 92.4  | 101   | 97.2  | 105.4 |
| Q4KML4 | <i>Abrac1</i>   | Costars family    | High   | 47 | 3  | 3  | 3  | 81   | 9     | 5.8  | 107  | 99.2  | 105.4 | 112.6 | 97.9  | 89.5  | 95.5  |
| Q6PGH1 | <i>Bud31</i>    | Protein BUD31     | High   | 13 | 2  | 2  | 2  | 144  | 17    | 8.82 | 33   | 96.9  | 90.9  | 112   | 97.6  | 100.6 | 102   |
| Q8CDM1 | <i>Atad2</i>    | ATPase family     | Medium | 1  | 1  | 1  | 1  | 1040 | 117.9 | 6.89 | 30   |       |       |       |       |       |       |
| Q9JK97 | <i>Kcnq4</i>    | Potassium         | Low    | 1  | 1  | 1  | 1  | 696  | 77    | 9.5  | 0    | 95    | 103.5 | 97.3  | 99.4  | 103.5 | 101.2 |
| Q5XG69 | <i>Fam169a</i>  | Soluble lamin-    | High   | 11 | 5  | 5  | 5  | 665  | 73.2  | 4.68 | 78   | 95.1  | 91.3  | 92.5  | 106.9 | 110.4 | 103.8 |
| Q3U3C9 | <i>Gse1</i>     | Genetic           | Medium | 1  | 1  | 1  | 1  | 1213 | 136.1 | 7.61 | 0    |       |       |       |       |       |       |
| P46662 | <i>Nf2</i>      | Merlin OS=Mus     | High   | 4  | 3  | 3  | 3  | 596  | 69.7  | 6.35 | 40   | 94.2  | 109.1 | 98.9  | 104.9 | 94.4  | 98.5  |
| Q9QYK9 | <i>Pnck</i>     | Calcium/calmod    | Medium | 3  | 1  | 1  | 1  | 343  | 38.5  | 6.47 | 0    | 113.2 | 91.8  | 126   | 68.7  | 89.6  | 110.8 |
| Q9D8C4 | <i>Ifi35</i>    | Interferon-       | High   | 6  | 1  | 1  | 1  | 286  | 31.9  | 5.87 | 38   |       |       |       |       |       |       |
| Q3V3V9 | <i>Carmil2</i>  | Capping protein,  | High   | 4  | 5  | 6  | 5  | 1296 | 141.3 | 7.18 | 97   | 93.7  | 97.5  | 98.5  | 105.5 | 103.4 | 101.3 |

|        |                  |                   |        |    |    |    |    |      |       |      |      |       |       |       |       |       |       |
|--------|------------------|-------------------|--------|----|----|----|----|------|-------|------|------|-------|-------|-------|-------|-------|-------|
| Q8VD63 | <i>Tspyl4</i>    | Testis-specific   | High   | 8  | 2  | 2  | 2  | 406  | 44.8  | 6.99 | 84   | 106.3 | 88.9  | 103.6 | 99.6  | 94.2  | 107.5 |
| Q78YZ6 | <i>Scoc</i>      | Short coiled-coil | High   | 43 | 3  | 3  | 3  | 125  | 14.1  | 4.68 | 60   | 95.7  | 99.4  | 107.3 | 93.2  | 101.8 | 102.6 |
| Q571F8 | <i>Gls2</i>      | Glutaminase       | High   | 4  | 2  | 3  | 1  | 602  | 66.3  | 7.66 | 28   |       |       |       |       |       |       |
| Q8BTU1 | <i>Cfap20</i>    | Cilia- and        | Medium | 6  | 1  | 1  | 1  | 193  | 22.7  | 9.76 | 27   | 78.8  | 107.3 | 93.1  | 102.8 | 110.5 | 107.6 |
| Q8BN57 |                  | Protein C3orf33   | High   | 4  | 1  | 2  | 1  | 294  | 33.6  | 9.89 | 15   | 108.7 | 94.5  | 108   | 95.7  | 94.8  | 98.2  |
| Q5XJV6 | <i>Lmtk3</i>     | Serine/threonine  | High   | 6  | 7  | 7  | 7  | 1424 | 150.8 | 4.88 | 130  | 96.2  | 95.5  | 92.3  | 107.1 | 102.8 | 106   |
| P57774 | <i>Npy</i>       | Pro-              | Low    | 8  | 1  | 1  | 1  | 97   | 10.9  | 7.12 | 0    | 102.5 | 107.6 | 113.2 | 90.4  | 79.9  | 106.4 |
| P02802 | <i>Mt1</i>       | Metallothionein-1 | Low    | 20 | 1  | 1  | 1  | 61   | 6     | 7.96 | 0    | 119.6 | 71.1  | 152.1 | 95.2  | 65.1  | 96.9  |
| Q91WK1 | <i>Spryd4</i>    | SPRY domain-      | High   | 30 | 5  | 5  | 5  | 207  | 23.3  | 9.45 | 85   | 92.8  | 97.1  | 97.3  | 107.8 | 101.5 | 103.5 |
| Q2TBE6 | <i>Pi4k2a</i>    | Phosphatidylinos  | High   | 9  | 4  | 5  | 4  | 479  | 54.2  | 8.05 | 108  | 97.6  | 100.1 | 110.3 | 92.8  | 101.4 | 97.8  |
| Q9JJA9 | <i>Tamalin</i>   | General receptor  | High   | 4  | 2  | 2  | 2  | 392  | 42.3  | 9.1  | 48   | 96.4  | 103.1 | 90.7  | 109.2 | 101.5 | 99.2  |
| P09541 | <i>Myl4</i>      | Myosin light      | Low    | 6  | 1  | 1  | 1  | 193  | 21.1  | 5.03 | 15   | 84.1  | 112.6 | 72.4  | 109.7 | 107.8 | 113.4 |
| P62192 | <i>Psmc1</i>     | 26S proteasome    | High   | 46 | 17 | 32 | 16 | 440  | 49.2  | 6.21 | 553  | 100.4 | 98.6  | 97    | 100.7 | 102.2 | 101   |
| P97318 | <i>Dab1</i>      | Disabled          | High   | 4  | 2  | 2  | 2  | 588  | 63.5  | 5.01 | 32   | 84.6  | 111.4 | 96.8  | 102.3 | 102.9 | 102   |
| P42669 | <i>Pura</i>      | Transcriptional   | High   | 50 | 11 | 27 | 11 | 321  | 34.9  | 6.44 | 662  | 100.3 | 98.3  | 92.4  | 102.8 | 104.9 | 101.3 |
| O70566 | <i>Diaph2</i>    | Protein           | High   | 7  | 7  | 8  | 7  | 1098 | 124.8 | 6.92 | 108  | 98.7  | 105.9 | 95.1  | 102.3 | 99.7  | 98.3  |
| Q61361 | <i>Bcan</i>      | Brevican core     | High   | 26 | 17 | 24 | 17 | 883  | 95.8  | 4.93 | 375  | 88.2  | 105.2 | 83.3  | 109.5 | 108.9 | 104.9 |
| P03930 | <i>Mtstp8</i>    | ATP synthase      | High   | 34 | 2  | 8  | 2  | 67   | 7.8   | 9.88 | 124  | 101.2 | 105   | 99.3  | 102.1 | 99.3  | 93.1  |
| Q9D051 | <i>Pdhb</i>      | Pyruvate          | High   | 47 | 12 | 55 | 12 | 359  | 38.9  | 6.87 | 899  | 95.4  | 105.5 | 91.4  | 101.7 | 104.6 | 101.3 |
| Q6DIB4 | <i>Nol4l</i>     | Nucleolar protein | High   | 3  | 1  | 1  | 1  | 494  | 53.9  | 4.96 | 37   | 83    | 94.5  | 91.8  | 102.2 | 112   | 116.6 |
| P63046 | <i>Sult4a1</i>   | Sulfotransferase  | High   | 28 | 7  | 12 | 7  | 284  | 33    | 5.53 | 164  | 98.2  | 101.8 | 94.1  | 100.1 | 100.7 | 105.2 |
| Q64010 | <i>Crk</i>       | Adapter           | High   | 47 | 12 | 18 | 12 | 304  | 33.8  | 5.55 | 318  | 95.5  | 95.8  | 96.8  | 104.3 | 103.5 | 104   |
| Q80SU7 | <i>Gvin1</i>     | Interferon-       | Medium | 0  | 1  | 1  | 1  | 2427 | 280.6 | 6.57 | 20   | 122.6 | 110   | 138.5 | 83.8  | 78.2  | 66.9  |
| O54967 | <i>Tnk2</i>      | Activated         | High   | 1  | 1  | 1  | 1  | 1055 | 116.9 | 7.43 | 53   | 92.3  | 97.8  | 99.2  | 101.5 | 102.3 | 106.8 |
| Q8R5A6 | <i>Tbc1d22a</i>  | TBC1 domain       | High   | 4  | 2  | 2  | 2  | 516  | 59.3  | 6.46 | 32   | 99.7  | 109.2 | 99.5  | 98.1  | 85.9  | 107.6 |
| F6SEU4 | <i>Syngap1</i>   | Ras/Rap           | High   | 40 | 43 | 67 | 40 | 1340 | 148.1 | 8.98 | 1109 | 93    | 96.1  | 89    | 109.4 | 107.5 | 105   |
| P58281 | <i>Opa1</i>      | Dynamin-like      | High   | 47 | 39 | 66 | 39 | 960  | 111.3 | 7.55 | 1263 | 95.8  | 101.5 | 88.3  | 104.5 | 105   | 104.8 |
| P18528 |                  | Ig heavy chain V  | High   | 19 | 1  | 2  | 1  | 98   | 11    | 7.93 | 24   | 169.1 | 68.5  | 206.7 | 44.3  | 59.6  | 51.9  |
| Q99LG2 | <i>Tnpo2</i>     | Transportin-2     | High   | 16 | 12 | 18 | 6  | 887  | 100.4 | 4.98 | 252  | 96.2  | 99    | 89.6  | 101.7 | 105.5 | 108   |
| Q9D0J8 | <i>Ptms</i>      | Parathyrosin      | High   | 23 | 4  | 4  | 2  | 101  | 11.4  | 4.22 | 107  | 97.9  | 95.3  | 92.7  | 100.6 | 106.6 | 106.9 |
| Q04899 | <i>Cdk18</i>     | Cyclin-           | High   | 22 | 8  | 9  | 6  | 451  | 51.8  | 8.51 | 168  | 97.8  | 97.1  | 104.7 | 95.2  | 103.7 | 101.5 |
| Q9WVQ5 | <i>Apip</i>      | Methylthioribulos | High   | 23 | 4  | 5  | 4  | 241  | 26.9  | 6.9  | 75   | 105.1 | 102.1 | 108.6 | 96.9  | 93.4  | 93.9  |
| O35143 | <i>Atp5if1</i>   | ATPase inhibitor, | High   | 18 | 2  | 3  | 2  | 106  | 12.2  | 9.64 | 38   | 87.5  | 103.3 | 81.9  | 111   | 110.6 | 105.8 |
| Q9CPT3 | <i>Nanp</i>      | N-                | High   | 7  | 1  | 1  | 1  | 248  | 27.8  | 6.07 | 40   | 99.3  | 105.5 | 82.1  | 103.8 | 99.2  | 110.1 |
| Q3UHX2 | <i>Pdap1</i>     | 28 kDa heat-      | High   | 33 | 7  | 9  | 7  | 181  | 20.6  | 7.39 | 194  | 94.1  | 97.2  | 93.4  | 105   | 107.4 | 103   |
| Q6PDG8 | <i>Mon1a</i>     | Vacuolar fusion   | Medium | 2  | 1  | 1  | 1  | 556  | 62.1  | 6.1  | 33   | 101.3 | 98.4  | 99.1  | 100.6 | 100   | 100.6 |
| P22723 | <i>Gabrg2</i>    | Gamma-            | High   | 15 | 7  | 9  | 7  | 474  | 55.1  | 8.66 | 129  | 97.3  | 97.6  | 86.5  | 109   | 105   | 104.7 |
| Q8BVR6 | <i>Rspry1</i>    | RING finger and   | High   | 7  | 3  | 4  | 3  | 576  | 64.3  | 5.5  | 78   | 92.7  | 97    | 90.4  | 103.8 | 110.2 | 105.7 |
| Q00897 | <i>Serpina1d</i> | Alpha-1-          | High   | 42 | 14 | 32 | 6  | 413  | 46    | 5.44 | 762  | 161.7 | 65.8  | 226.8 | 46    | 48.6  | 51    |
| P05202 | <i>Got2</i>      | Aspartate         | High   | 50 | 21 | 71 | 21 | 430  | 47.4  | 9    | 1133 | 100.8 | 105.5 | 93.5  | 102.7 | 100.1 | 97.4  |
| O35153 | <i>Bet1l</i>     | BET1-like         | Low    | 14 | 1  | 1  | 1  | 111  | 12.4  | 8.82 | 0    | 103.2 | 118.7 | 89.8  | 91.3  | 100.3 | 96.6  |
| Q07113 | <i>Igf2r</i>     | Cation-           | Medium | 1  | 1  | 1  | 1  | 2483 | 273.6 | 5.71 | 17   |       |       |       |       |       |       |
| P53986 | <i>Slc16a1</i>   | Monocarboxylate   | High   | 10 | 4  | 6  | 4  | 493  | 53.2  | 7.47 | 98   | 109.5 | 102.9 | 116   | 89.4  | 90.3  | 91.9  |
| Q9QYF1 | <i>Rdh11</i>     | Retinol           | High   | 13 | 3  | 4  | 3  | 316  | 35.1  | 8.91 | 76   | 99.1  | 106.4 | 99.6  | 96.4  | 98.8  | 99.7  |
| Q9DBB9 | <i>Cpn2</i>      | Carboxypeptidas   | High   | 2  | 1  | 1  | 1  | 547  | 60.4  | 5.88 | 18   |       |       |       |       |       |       |
| Q9R112 | <i>Sqor</i>      | Sulfide:quinone   | High   | 6  | 2  | 2  | 2  | 450  | 50.3  | 9.09 | 22   | 87.4  | 107.9 | 98.2  | 99    | 96.4  | 111.2 |
| Q8JZZ7 | <i>Adgrl2</i>    | Adhesion G        | High   | 3  | 3  | 3  | 3  | 1487 | 166.5 | 6.71 | 19   | 97    | 98.5  | 92.6  | 103.8 | 106.4 | 101.8 |
| O35218 | <i>Cpsf2</i>     | Cleavage and      | High   | 3  | 2  | 2  | 2  | 782  | 88.3  | 5.11 | 23   | 91.9  | 98.7  | 100.3 | 109.7 | 91.4  | 108.1 |
| Q61655 | <i>Ddx19a</i>    | ATP-dependent     | High   | 22 | 10 | 11 | 10 | 478  | 53.9  | 6.67 | 178  | 100.3 | 98.9  | 105.1 | 94.8  | 98.9  | 102   |
| A6X8Z5 | <i>Arhgap31</i>  | Rho GTPase-       | Low    | 0  | 1  | 1  | 1  | 1425 | 155.2 | 5.77 | 0    |       |       |       |       |       |       |
| Q8VE80 | <i>Thoc3</i>     | THO complex       | High   | 5  | 2  | 2  | 2  | 351  | 38.7  | 6.09 | 47   |       |       |       |       |       |       |
| P06837 | <i>Gap43</i>     | Neuromodulin      | High   | 74 | 19 | 49 | 19 | 227  | 23.6  | 4.73 | 893  | 85.2  | 79    | 80.1  | 108.5 | 127.8 | 119.5 |
| Q9JMG3 | <i>Tmub1</i>     | Transmembrane     | Medium | 4  | 1  | 1  | 1  | 245  | 26.3  | 5.03 | 0    |       |       |       |       |       |       |
| P42232 | <i>Stat5b</i>    | Signal            | High   | 7  | 4  | 4  | 4  | 786  | 89.9  | 6.05 | 57   | 97.7  | 106.4 | 94.5  | 98.6  | 103.8 | 99.1  |
| Q8K341 | <i>Atat1</i>     | Alpha-tubulin N-  | High   | 21 | 8  | 9  | 8  | 421  | 47.1  | 9.98 | 165  | 91.8  | 91.1  | 96.2  | 107.2 | 105.4 | 108.2 |
| Q4PJX1 | <i>Odr4</i>      | Protein odr-4     | High   | 4  | 2  | 2  | 2  | 447  | 50    | 6.14 | 19   |       |       |       |       |       |       |
| Q8K0D2 | <i>Habp2</i>     | Hyaluronan-       | Low    | 2  | 1  | 1  | 1  | 558  | 62.3  | 6.37 | 0    | 96.3  | 93.8  | 91.1  | 95.5  | 94.2  | 129   |
| Q9D328 | <i>Tmem35a</i>   | Transmembrane     | High   | 13 | 2  | 3  | 2  | 167  | 18.5  | 9.99 | 52   | 91.9  | 93.6  | 94    | 100.1 | 109.9 | 110.4 |
| P62482 | <i>Kcnab2</i>    | Voltage-gated     | High   | 40 | 13 | 24 | 10 | 367  | 41    | 9    | 363  | 94.9  | 105.9 | 93.9  | 102.9 | 100   | 102.5 |
| Q8K1N1 | <i>Pnpla8</i>    | Calcium-          | High   | 13 | 9  | 10 | 9  | 776  | 87.3  | 9.23 | 163  | 97.8  | 92.6  | 99.1  | 107.1 | 103.4 | 100   |
| Q9QXG4 | <i>Acss2</i>     | Acetyl-coenzyme   | High   | 12 | 7  | 8  | 7  | 701  | 78.8  | 6.64 | 115  | 97.1  | 104.9 | 89.2  | 108   | 100.5 | 100.2 |
| Q8VE52 | <i>Ogfrl1</i>    | Opioid growth     | High   | 7  | 3  | 3  | 3  | 464  | 52.2  | 6.57 | 29   | 103.2 | 102.2 | 94.4  | 111.1 | 87.2  | 102   |
| Q6PHN9 | <i>Rab35</i>     | Ras-related       | High   | 58 | 10 | 29 | 8  | 201  | 23    | 8.29 | 652  | 101.9 | 101.9 | 98.8  | 99.9  | 99.6  | 98    |
| Q99M71 | <i>Epdr1</i>     | Mammalian         | High   | 20 | 4  | 8  | 4  | 224  | 25.5  | 7.58 | 172  | 95.8  | 107.3 | 95    | 108.6 | 97.5  | 95.8  |
| P02468 | <i>Lamc1</i>     | Laminin subunit   | High   | 12 | 13 | 17 | 13 | 1607 | 177.2 | 5.21 | 258  | 101   | 105.9 | 95.6  | 99.4  | 98.9  | 99.2  |
| Q9CWM4 | <i>Pfdn1</i>     | Prefoldin subunit | High   | 30 | 4  | 7  | 4  | 122  | 14.2  | 8.32 | 105  | 98.1  | 99.8  | 94.4  | 103.7 | 100.4 | 103.7 |
| Q6DFW4 | <i>Nop58</i>     | Nucleolar protein | High   | 6  | 3  | 3  | 3  | 536  | 60.3  | 8.34 | 0    |       |       |       |       |       |       |
| Q61147 | <i>Cp</i>        | Ceruloplasmin     | High   | 23 | 19 | 27 | 19 | 1061 | 121.1 | 5.85 | 397  | 155.5 | 77.8  | 174.9 | 59.9  | 62.7  | 69.2  |

|        |                 |                    |        |    |     |     |     |      |       |       |      |       |       |       |       |       |       |
|--------|-----------------|--------------------|--------|----|-----|-----|-----|------|-------|-------|------|-------|-------|-------|-------|-------|-------|
| Q8BYH7 | <i>Tbc1d17</i>  | TBC1 domain        | High   | 7  | 4   | 5   | 4   | 645  | 72.8  | 5.25  | 63   | 94.3  | 101.9 | 100.2 | 104.9 | 100.5 | 98.3  |
| O88455 | <i>Dhcr7</i>    | 7-                 | High   | 6  | 2   | 3   | 2   | 471  | 53.9  | 8.35  | 50   | 101.6 | 99.7  | 93.3  | 98.7  | 104.8 | 101.9 |
| Q9DAS9 | <i>Gng12</i>    | Guanine            | High   | 54 | 4   | 13  | 4   | 72   | 8     | 8.97  | 219  | 98.3  | 104.9 | 94.5  | 98.9  | 100.9 | 102.5 |
| O88998 | <i>Olfm1</i>    | Noelin OS=Mus      | High   | 24 | 10  | 16  | 10  | 485  | 55.4  | 6.95  | 287  | 97.6  | 100.4 | 88.7  | 108   | 104.3 | 101   |
| Q8VCQ3 | <i>Nrbf2</i>    | Nuclear            | Medium | 4  | 1   | 1   | 1   | 287  | 32.5  | 5.76  | 0    |       |       |       |       |       |       |
| O35387 | <i>Hax1</i>     | HCLS1-             | High   | 10 | 3   | 3   | 3   | 280  | 31.6  | 4.91  | 31   | 100.3 | 101   | 94.3  | 99.8  | 98.3  | 106.3 |
| P32648 | <i>Vip</i>      | VIP peptides       | High   | 14 | 2   | 2   | 2   | 170  | 19    | 6.6   | 37   | 107.9 | 93.1  | 95.1  | 103.7 | 93.5  | 106.6 |
| Q3ULJ0 | <i>Gpd1l</i>    | Glycerol-3-        | High   | 57 | 18  | 29  | 16  | 351  | 38.2  | 6.77  | 463  | 96.7  | 96.3  | 94    | 105.9 | 103.9 | 103.1 |
| Q923G2 | <i>Polr2h</i>   | DNA-directed       | High   | 7  | 1   | 1   | 1   | 150  | 17.1  | 4.68  | 36   |       |       |       |       |       |       |
| O35664 | <i>Ifnar2</i>   | Interferon         | Low    | 2  | 1   | 1   | 1   | 513  | 56.5  | 4.59  | 0    | 97.9  | 111.8 | 115.5 | 88.6  | 90    | 96.2  |
| Q60865 | <i>Caprin1</i>  | Caprin-1           | High   | 14 | 9   | 13  | 9   | 707  | 78.1  | 5.25  | 205  | 100.3 | 102.8 | 102.3 | 97.8  | 97.7  | 99.2  |
| Q9CY28 | <i>Gtpbp8</i>   | GTP-binding        | High   | 5  | 1   | 1   | 1   | 285  | 31.9  | 9.28  | 46   | 81    | 89.6  | 100.7 | 110.6 | 110.9 | 107.3 |
| Q8BJF9 | <i>Chmp2b</i>   | Charged            | High   | 14 | 3   | 3   | 3   | 213  | 23.9  | 8.78  | 42   | 96.8  | 96.8  | 100.1 | 99.4  | 107.9 | 99    |
| Q9D8U8 | <i>Snx5</i>     | Sorting nexin-5    | High   | 30 | 12  | 16  | 11  | 404  | 46.8  | 6.62  | 200  | 103   | 102.7 | 106.5 | 100.9 | 92.9  | 94    |
| Q9D7N6 | <i>Mrpl30</i>   | 39S ribosomal      | Low    | 7  | 1   | 1   | 1   | 160  | 18.3  | 10.15 | 0    |       |       |       |       |       |       |
| P42703 | <i>Lifr</i>     | Leukemia           | High   | 9  | 7   | 7   | 7   | 1092 | 122.5 | 6.04  | 85   | 127.6 | 79.1  | 159.3 | 76.7  | 78.3  | 78.9  |
| Q9ES07 | <i>Slc15a2</i>  | Solute carrier     | Medium | 1  | 1   | 1   | 1   | 729  | 81.6  | 7.34  | 18   |       |       |       |       |       |       |
| P16254 | <i>Srp14</i>    | Signal             | High   | 13 | 1   | 1   | 1   | 110  | 12.5  | 10.17 | 83   | 98.2  | 92.1  | 112.4 | 102.7 | 107.1 | 87.5  |
| Q8R1V4 | <i>Tmed4</i>    | Transmembrane      | High   | 16 | 3   | 5   | 2   | 227  | 26    | 8.18  | 94   | 99.9  | 104   | 100.4 | 105.1 | 97.1  | 93.6  |
| Q5IRJ6 | <i>Slc30a9</i>  | Zinc transporter   | High   | 7  | 3   | 4   | 3   | 567  | 62.8  | 8.69  | 76   | 92.7  | 100.5 | 95.6  | 97.2  | 112.3 | 101.7 |
| Q8VHV1 | <i>Baalc</i>    | Brain and acute    | Low    | 5  | 1   | 1   | 1   | 145  | 15.5  | 7.06  | 17   | 100   | 94.4  | 90.9  | 106.8 | 99.7  | 108.2 |
| Q8BL65 | <i>Ablim2</i>   | Actin-binding      | High   | 14 | 8   | 15  | 7   | 612  | 68.1  | 8.02  | 269  | 95.5  | 100.8 | 93.2  | 101.8 | 104.3 | 104.5 |
| Q61735 | <i>Cd47</i>     | Leukocyte          | High   | 13 | 4   | 14  | 4   | 303  | 33.1  | 8.63  | 350  | 97.4  | 99.8  | 93.5  | 108.4 | 102.4 | 98.4  |
| Q99N87 | <i>Mrps5</i>    | 28S ribosomal      | High   | 13 | 6   | 6   | 6   | 432  | 48.2  | 10.14 | 58   | 96.4  | 103.7 | 93.6  | 99.6  | 105.2 | 101.7 |
| Q9CR26 | <i>Vta1</i>     | Vacuolar protein   | High   | 28 | 9   | 15  | 9   | 309  | 33.9  | 6.13  | 333  | 97.4  | 100   | 102.5 | 98.8  | 96.3  | 104.9 |
| Q6P9Q6 | <i>Fkbp15</i>   | FK506-binding      | High   | 6  | 5   | 5   | 5   | 1216 | 132.9 | 5.07  | 87   | 100.9 | 104.4 | 98    | 98.2  | 97.3  | 101.1 |
| Q9WTP6 | <i>Ak2</i>      | Adenylate kinase   | High   | 22 | 4   | 7   | 4   | 239  | 26.5  | 7.39  | 220  | 96.5  | 102.2 | 113.2 | 96.1  | 95.3  | 96.7  |
| Q3UL36 | <i>Arglu1</i>   | Arginine and       | High   | 9  | 3   | 3   | 3   | 271  | 32.9  | 10.36 | 32   | 103.9 | 101.8 | 99.1  | 94.9  | 95.9  | 104.4 |
| O54950 | <i>Prkag1</i>   | 5'-AMP-activated   | High   | 23 | 7   | 9   | 6   | 330  | 37.5  | 7.14  | 154  | 102   | 107.5 | 96.7  | 97.4  | 100   | 96.4  |
| Q6ZPF3 | <i>Tiam2</i>    | T-lymphoma         | High   | 4  | 3   | 4   | 3   | 1715 | 192.4 | 7.44  | 62   | 94.2  | 105   | 89.8  | 97.7  | 104.4 | 109   |
| P27671 | <i>Rasgrf1</i>  | Ras-specific       | High   | 10 | 11  | 12  | 9   | 1262 | 144   | 7.17  | 218  | 96.6  | 98.1  | 97.7  | 100.6 | 103   | 104.1 |
| P97478 | <i>Coq7</i>     | 5-                 | High   | 9  | 2   | 2   | 2   | 217  | 24    | 7.17  | 47   | 104   | 99.7  | 109.1 | 94.5  | 94    | 98.7  |
| P17563 | <i>Selenbp1</i> | Methanethiol       | High   | 23 | 8   | 9   | 8   | 472  | 52.5  | 6.29  | 106  | 98.9  | 100.3 | 102.4 | 97.5  | 101.9 | 99    |
| Q1RLL3 | <i>Cpne9</i>    | Copine-9           | High   | 16 | 8   | 12  | 4   | 553  | 61.8  | 5.4   | 164  | 90.2  | 107.7 | 80.4  | 116.2 | 97.3  | 108.2 |
| Q6ZWR4 | <i>Ppp2r2b</i>  | Serine/threonine   | High   | 16 | 6   | 8   | 1   | 443  | 51.7  | 6.44  | 107  |       |       |       |       |       |       |
| Q7TSC1 | <i>Prrc2a</i>   | Protein PRRC2A     | High   | 3  | 6   | 7   | 5   | 2158 | 229.1 | 9.39  | 60   | 93.3  | 91.5  | 95.6  | 112.2 | 105.7 | 101.6 |
| Q8BYA0 | <i>Tbcd</i>     | Tubulin-specific   | High   | 13 | 12  | 13  | 12  | 1196 | 133.2 | 6.51  | 310  | 101.4 | 99.2  | 99.1  | 96.9  | 103.7 | 99.6  |
| Q8K4M5 | <i>Commf1</i>   | COMM domain-       | High   | 16 | 2   | 2   | 2   | 188  | 21    | 7.59  | 42   | 98.4  | 103.6 | 96.7  | 103   | 98.1  | 100.3 |
| Q61036 | <i>Pak3</i>     | Serine/threonine   | High   | 35 | 18  | 38  | 7   | 559  | 62.4  | 5.4   | 641  | 99.4  | 96.5  | 97    | 99.8  | 102.5 | 104.7 |
| Q99MB1 | <i>Tlr3</i>     | Toll-like receptor | High   | 1  | 1   | 1   | 1   | 905  | 103.6 | 7.93  | 37   | 109.6 | 109.5 | 130.9 | 81.9  | 80.7  | 87.4  |
| Q9Z2H5 | <i>Epb41l1</i>  | Band 4.1-like      | High   | 37 | 27  | 60  | 24  | 879  | 98.3  | 5.62  | 950  | 95    | 96.4  | 89    | 105.2 | 107.5 | 107   |
| Q8CHP5 | <i>Pym1</i>     | Partner of Y14     | High   | 21 | 4   | 4   | 4   | 203  | 22.7  | 9.5   | 76   | 100.1 | 94.5  | 97.8  | 96.8  | 101.2 | 109.6 |
| Q9DBS2 | <i>Tprg1l</i>   | Tumor protein      | High   | 46 | 6   | 12  | 6   | 266  | 29.8  | 7.37  | 182  | 96.3  | 92.8  | 98.3  | 102.6 | 101.1 | 108.9 |
| O54931 | <i>Akap2</i>    | A-kinase anchor    | High   | 10 | 5   | 5   | 5   | 893  | 98.5  | 5.21  | 84   | 97.3  | 95.8  | 98.4  | 98.8  | 103.4 | 106.3 |
| Q9CPY1 | <i>Mrpl51</i>   | 39S ribosomal      | Medium | 9  | 1   | 1   | 1   | 128  | 15.1  | 11    | 20   |       |       |       |       |       |       |
| P32261 | <i>Serpinc1</i> | Antithrombin-III   | High   | 27 | 10  | 18  | 10  | 465  | 52    | 6.46  | 293  | 162.4 | 79.6  | 187   | 54.7  | 54.2  | 62.1  |
| P51410 | <i>Rpl9</i>     | 60S ribosomal      | High   | 45 | 7   | 15  | 7   | 192  | 21.9  | 9.95  | 215  | 105.1 | 106.4 | 104.9 | 97.6  | 95.8  | 90.2  |
| Q9QXS1 | <i>Plec</i>     | Plectin OS=Mus     | High   | 46 | 188 | 274 | 184 | 4691 | 533.9 | 5.96  | 4717 | 103.1 | 108.2 | 99.7  | 97.9  | 95.4  | 95.8  |
| Q8K400 | <i>Stxbp5</i>   | Syntaxin-binding   | High   | 17 | 14  | 16  | 13  | 1152 | 127.6 | 7.21  | 237  | 100.6 | 100.8 | 101.1 | 100.2 | 98.5  | 98.8  |
| Q66GT5 | <i>Ptpmt1</i>   | Phosphatidylglyc   | High   | 16 | 2   | 2   | 2   | 193  | 21.9  | 9.72  | 61   | 101.6 | 104.5 | 93.1  | 96.8  | 105.2 | 98.8  |
| Q8BLN6 | <i>Unc80</i>    | Protein unc-80     | High   | 2  | 4   | 4   | 4   | 3261 | 363.3 | 6.89  | 62   | 90.6  | 99.3  | 104.9 | 100.4 | 95    | 109.8 |
| P43277 | <i>H1-3</i>     | Histone H1.3       | High   | 38 | 11  | 25  | 1   | 221  | 22.1  | 11.03 | 572  | 105.7 | 93.5  | 124.1 | 83.4  | 87.1  | 106   |
| Q80TQ5 | <i>Plekhn2</i>  | Pleckstrin         | High   | 1  | 1   | 2   | 1   | 1018 | 112.7 | 4.96  | 13   | 93.3  | 116.8 | 94.9  | 111.3 | 87.3  | 96.4  |
| P68037 | <i>Ube2l3</i>   | Ubiquitin-         | High   | 64 | 7   | 14  | 7   | 154  | 17.9  | 8.51  | 285  | 99.7  | 99.6  | 104.2 | 95.1  | 99.9  | 101.4 |
| P62627 | <i>Dynlrb1</i>  | Dynein light       | High   | 74 | 5   | 9   | 5   | 96   | 11    | 7.25  | 175  | 96.2  | 101.2 | 89.4  | 106.3 | 104.9 | 102   |
| Q8VDN4 | <i>Ccdc92</i>   | Coiled-coil        | High   | 16 | 5   | 6   | 5   | 314  | 35.2  | 9.38  | 47   | 91.8  | 101.7 | 91.1  | 110.8 | 99.6  | 105   |
| Q80ZJ1 | <i>Rap2a</i>    | Ras-related        | High   | 58 | 8   | 23  | 4   | 183  | 20.6  | 4.82  | 583  | 95    | 97.3  | 92.8  | 104.2 | 106.1 | 104.6 |
| Q8R502 | <i>Lrrc8c</i>   | Volume-            | High   | 5  | 4   | 5   | 3   | 803  | 92.3  | 7.81  | 91   | 109   | 94.1  | 109   | 96.6  | 95.1  | 96.2  |
| Q60803 | <i>Traf3</i>    | TNF receptor-      | High   | 4  | 2   | 2   | 2   | 567  | 64.3  | 8.05  | 21   | 87.2  | 91.7  | 112.2 | 105.9 | 105   | 98    |
| P62880 | <i>Gnb2</i>     | Guanine            | High   | 49 | 12  | 66  | 5   | 340  | 37.3  | 6     | 1717 | 94.9  | 98.2  | 97.4  | 103.6 | 100.2 | 105.7 |
| Q9CQV6 | <i>Map1lc3b</i> | Microtubule-       | High   | 22 | 3   | 8   | 1   | 125  | 14.6  | 8.43  | 69   | 92.8  | 103.5 | 95.2  | 99.8  | 105   | 103.8 |
| Q9CWF2 | <i>Tubb2b</i>   | Tubulin beta-2B    | High   | 71 | 24  | 381 | 1   | 445  | 49.9  | 4.89  | 6992 | 64.8  | 65.9  | 71.3  | 164.7 | 120   | 113.5 |
| Q9WU40 | <i>Lemd3</i>    | Inner nuclear      | High   | 5  | 4   | 4   | 4   | 921  | 100.2 | 7.55  | 35   | 99.1  | 96.1  | 90.4  | 107.2 | 108.9 | 98.4  |
| P62743 | <i>Ap2s1</i>    | AP-2 complex       | High   | 44 | 7   | 21  | 7   | 142  | 17    | 6.18  | 363  | 97.5  | 102.4 | 93    | 103.6 | 103.2 | 100.3 |
| P63101 | <i>Ywhaz</i>    | 14-3-3 protein     | High   | 67 | 17  | 193 | 13  | 245  | 27.8  | 4.79  | 4195 | 96.1  | 99.1  | 94.4  | 103.5 | 104.8 | 102.2 |
| Q9D958 | <i>Spcs1</i>    | Signal peptidase   | High   | 8  | 1   | 2   | 1   | 161  | 18.2  | 10.01 | 17   | 105.8 | 97.6  | 116.3 | 91.3  | 93.6  | 95.3  |
| P61166 | <i>Tmem258</i>  | Transmembrane      | Medium | 10 | 1   | 1   | 1   | 79   | 9.1   | 5.83  | 19   |       |       |       |       |       |       |
| Q8R3K3 | <i>Ptcd2</i>    | Pentatricopeptid   | High   | 3  | 1   | 1   | 1   | 381  | 43.8  | 9.04  | 38   | 96.6  | 99.7  | 100.4 | 94.2  | 101.2 | 108   |



|        |          |                    |        |    |    |     |    |      |       |       |      |       |       |       |       |       |       |
|--------|----------|--------------------|--------|----|----|-----|----|------|-------|-------|------|-------|-------|-------|-------|-------|-------|
| Q9CZU6 | Cs       | Citrate synthase,  | High   | 41 | 17 | 62  | 17 | 464  | 51.7  | 8.57  | 1089 | 96.9  | 101.4 | 92.6  | 105.1 | 102   | 102   |
| Q9JKB1 | Uchl3    | Ubiquitin          | High   | 38 | 8  | 13  | 8  | 230  | 26.1  | 5.05  | 260  | 95.2  | 95.5  | 100.4 | 99.9  | 105.1 | 103.9 |
| O70133 | Dhx9     | ATP-dependent      | High   | 19 | 24 | 33  | 24 | 1380 | 149.4 | 6.83  | 579  | 101.5 | 98    | 103.6 | 100.8 | 98.4  | 97.7  |
| O88533 | Ddc      | Aromatic-L-        | High   | 13 | 5  | 6   | 5  | 480  | 53.8  | 6.6   | 115  | 87.2  | 97    | 91.4  | 104.1 | 106.4 | 114   |
| Q9D125 | Mrps25   | 28S ribosomal      | High   | 8  | 2  | 2   | 2  | 171  | 19.9  | 9.23  | 21   | 97.2  | 108   | 86.3  | 100.4 | 104.9 | 103.3 |
| P62259 | Ywhae    | 14-3-3 protein     | High   | 73 | 22 | 191 | 20 | 255  | 29.2  | 4.74  | 3250 | 96.3  | 99.6  | 93.7  | 102.2 | 105.7 | 102.5 |
| Q5S006 | Lrrk2    | Leucine-rich       | Medium | 1  | 1  | 1   | 1  | 2527 | 284.5 | 6.83  | 0    | 80.5  | 105.1 | 98.5  | 82.6  | 113.5 | 119.8 |
| Q99LH2 | Ptdss1   | Phosphatidylseri   | High   | 9  | 3  | 3   | 3  | 473  | 55.6  | 8.28  | 28   | 98.3  | 100.9 | 112.2 | 94.9  | 94.9  | 98.8  |
| Q8BY87 | Usp47    | Ubiquitin          | High   | 6  | 7  | 7   | 7  | 1376 | 157.4 | 5.11  | 127  | 93.7  | 99.2  | 91.6  | 110.3 | 100.1 | 105.1 |
| Q61553 | Fscn1    | Fascin OS=Mus      | High   | 65 | 26 | 48  | 26 | 493  | 54.5  | 6.89  | 841  | 93.5  | 97.4  | 90.3  | 107.1 | 105.2 | 106.6 |
| Q923S9 | Rab30    | Ras-related        | High   | 22 | 4  | 9   | 3  | 203  | 23    | 4.97  | 99   | 100.2 | 98.4  | 105.2 | 99.8  | 98.7  | 97.7  |
| Q61686 | Cbx5     | Chromobox          | High   | 30 | 5  | 8   | 4  | 191  | 22.2  | 5.86  | 116  | 102.1 | 93    | 114.8 | 96    | 97    | 97    |
| P01843 |          | Ig lambda-1        | High   | 34 | 2  | 2   | 2  | 105  | 11.6  | 6.27  | 16   | 119.6 | 98    | 146.4 | 72.6  | 88.3  | 75    |
| O88291 | Znf326   | DBIRD complex      | High   | 9  | 4  | 5   | 4  | 580  | 65.2  | 5.19  | 22   | 99.5  | 98.5  | 102.2 | 95    | 100.9 | 103.9 |
| Q9WUD8 | Faim     | Fas apoptotic      | Medium | 7  | 1  | 1   | 1  | 179  | 20.2  | 5.64  | 0    |       |       |       |       |       |       |
| Q9JKR6 | Hyou1    | Hypoxia up-        | High   | 30 | 22 | 34  | 22 | 999  | 111.1 | 5.19  | 617  | 99.5  | 99.6  | 105.3 | 96.8  | 99.6  | 99.3  |
| Q7TSH2 | Phkb     | Phosphorylase b    | High   | 6  | 4  | 4   | 4  | 1085 | 123.8 | 6.83  | 127  | 98.3  | 90.6  | 103.8 | 101.7 | 101   | 104.7 |
| Q61490 | Alcam    | CD166 antigen      | High   | 27 | 13 | 23  | 13 | 583  | 65.1  | 6.15  | 293  | 94.9  | 101.6 | 88    | 101.9 | 107.7 | 105.9 |
| Q99PG2 | Ogfr     | Opioid growth      | High   | 18 | 4  | 4   | 4  | 633  | 70.6  | 4.77  | 63   | 103.1 | 105.8 | 104.4 | 97.5  | 94.3  | 95    |
| Q62415 | Ppp1r13b | Apoptosis-         | High   | 7  | 6  | 7   | 5  | 1087 | 119.1 | 6.68  | 74   | 99.8  | 98.8  | 95.7  | 102.5 | 100.4 | 102.8 |
| Q9Z1S3 | Rasgrp1  | RAS guanyl-        | High   | 11 | 6  | 6   | 6  | 795  | 90.2  | 8.1   | 121  | 89.3  | 96.2  | 95.5  | 111.8 | 94.2  | 113   |
| O08583 | Alyref   | THO complex        | High   | 25 | 5  | 8   | 5  | 255  | 26.9  | 11.15 | 276  | 94.3  | 88.2  | 93.2  | 98.8  | 99.6  | 125.9 |
| Q80W47 | Wip2     | WD repeat          | High   | 36 | 10 | 12  | 9  | 445  | 48.4  | 5.86  | 227  | 94.7  | 103.9 | 96.8  | 103.4 | 101.2 | 100.1 |
| Q9WUA2 | Farsb    | Phenylalanine--    | High   | 33 | 19 | 23  | 19 | 589  | 65.7  | 7.12  | 314  | 102.8 | 96.6  | 103.9 | 98.1  | 100.4 | 98.3  |
| O70572 | Smpd2    | Sphingomyelin      | High   | 4  | 3  | 3   | 3  | 419  | 47.4  | 6.44  | 14   | 99.7  | 100.8 | 108.4 | 99.8  | 95.5  | 95.8  |
| Q8C817 | Tmem200a | Transmembrane      | High   | 6  | 2  | 2   | 2  | 491  | 54    | 9.26  | 29   | 96    | 100.3 | 104.8 | 93.2  | 98.2  | 107.5 |
| Q9D281 | Fam114a1 | Protein Noxp20     | High   | 3  | 1  | 1   | 1  | 569  | 61    | 4.56  | 32   |       |       |       |       |       |       |
| P17156 | Hspa2    | Heat shock-        | High   | 51 | 31 | 100 | 18 | 633  | 69.6  | 5.67  | 1769 | 96.3  | 101.2 | 103.2 | 95.2  | 103.4 | 100.8 |
| Q9Z2A5 | Ate1     | Arginyl-tRNA--     | High   | 8  | 3  | 4   | 3  | 516  | 59.1  | 8.19  | 32   | 96.2  | 99.8  | 98.2  | 100.6 | 104.5 | 100.6 |
| P56371 | Rab4a    | Ras-related        | High   | 42 | 7  | 16  | 5  | 218  | 24.4  | 6.07  | 259  | 98.5  | 97.8  | 91.9  | 102.5 | 106.5 | 102.7 |
| P26039 | Tln1     | Talin-1 OS=Mus     | High   | 29 | 52 | 67  | 43 | 2541 | 269.7 | 6.18  | 1409 | 114.1 | 104.6 | 122.9 | 83.9  | 85.7  | 88.8  |
| O08915 | Aip      | AH receptor-       | High   | 15 | 4  | 5   | 4  | 330  | 37.6  | 6.4   | 64   | 107.6 | 97.5  | 100.2 | 98.6  | 95.8  | 100.2 |
| Q9JI75 | Nqo2     | Ribosyldihydroni   | Medium | 3  | 1  | 1   | 1  | 231  | 26.2  | 7.01  | 18   | 103.1 | 102.8 | 115.9 | 93.2  | 91.8  | 93.2  |
| P56380 | Nudt2    | Bis(5'-nucleosyl)- | High   | 37 | 4  | 5   | 4  | 147  | 17    | 6.28  | 45   | 96.4  | 98.9  | 94.8  | 105.7 | 99.3  | 105   |
| Q6PDC0 | Rundc3b  | RUN domain-        | High   | 6  | 2  | 2   | 2  | 408  | 45.1  | 5.17  | 48   | 100.2 | 102.9 | 97.1  | 98.3  | 104.5 | 97    |
| Q9Z1J3 | Nfs1     | Cysteine           | High   | 21 | 8  | 11  | 8  | 459  | 50.5  | 8.16  | 98   | 95.7  | 100.3 | 94.9  | 104.9 | 101.3 | 102.9 |
| Q8QZY1 | Eif3l    | Eukaryotic         | High   | 32 | 16 | 24  | 16 | 564  | 66.6  | 6.44  | 382  | 105.1 | 101.6 | 107   | 97.3  | 95.3  | 93.7  |
| P10518 | Alad     | Delta-             | High   | 13 | 4  | 5   | 4  | 330  | 36    | 6.79  | 118  | 100.9 | 102.5 | 101.4 | 94.4  | 102.7 | 98.1  |
| Q9DCZ1 | Gmpr     | GMP reductase      | High   | 18 | 6  | 6   | 4  | 345  | 37.5  | 7.09  | 58   | 85.4  | 103.5 | 103.2 | 101.1 | 101.3 | 105.5 |
| P06684 | C5       | Complement C5      | High   | 5  | 8  | 9   | 8  | 1680 | 188.8 | 6.81  | 73   | 151.5 | 71.9  | 180.9 | 63.5  | 63.9  | 68.3  |
| Q62203 | Sf3a2    | Splicing factor    | High   | 7  | 2  | 3   | 2  | 475  | 49.9  | 9.54  | 50   | 97.2  | 95    | 99.1  | 106.2 | 108.2 | 94.3  |
| Q9R1P1 | Psmb3    | Proteasome         | High   | 39 | 6  | 11  | 6  | 205  | 22.9  | 6.55  | 247  | 100.4 | 101.6 | 99.6  | 99.1  | 100.2 | 99.1  |
| Q9Z2X1 | Hnrnpf   | Heterogeneous      | High   | 30 | 9  | 15  | 7  | 415  | 45.7  | 5.49  | 326  | 107.3 | 101.5 | 115   | 92.6  | 92.1  | 91.5  |
| O35691 | Pnn      | Pinin OS=Mus       | High   | 13 | 9  | 10  | 9  | 725  | 82.4  | 7.01  | 96   | 99.4  | 95.1  | 100.6 | 101   | 98.4  | 105.4 |
| Q9CWG8 | Ndufaf7  | Protein arginine   | High   | 21 | 7  | 8   | 7  | 436  | 48.4  | 6.95  | 109  | 101.3 | 98.6  | 92.4  | 97.5  | 105.1 | 104.9 |
| Q7TNC9 | Inpp5a   | Inositol           | High   | 13 | 6  | 8   | 6  | 412  | 47.6  | 6.92  | 120  | 96.9  | 101.1 | 93.5  | 105.8 | 102.1 | 100.5 |
| Q8K1L5 | Ppp1r11  | E3 ubiquitin-      | High   | 12 | 2  | 2   | 2  | 131  | 14.5  | 6.09  | 51   | 96.9  | 95.9  | 89.3  | 100.9 | 102.8 | 114.1 |
| Q91YW3 | Dnajc3   | DnaJ homolog       | High   | 15 | 5  | 6   | 5  | 504  | 57.4  | 5.85  | 141  | 101.4 | 104.2 | 109.8 | 95.9  | 94.4  | 94.3  |
| Q9WTR5 | Cdh13    | Cadherin-13        | High   | 16 | 8  | 14  | 8  | 714  | 78.1  | 5.12  | 216  | 93.4  | 84.1  | 96.9  | 108.6 | 108.7 | 108.4 |
| Q9D880 | Timm50   | Mitochondrial      | High   | 5  | 2  | 2   | 2  | 353  | 39.8  | 8.13  | 45   | 103.8 | 101.6 | 101.1 | 104.9 | 93.8  | 94.8  |
| O88428 | Papss2   | Bifunctional 3'-   | High   | 4  | 2  | 2   | 1  | 621  | 70.3  | 7.58  | 31   |       |       |       |       |       |       |
| Q9JHS4 | Cipx     | ATP-dependent      | High   | 4  | 2  | 2   | 2  | 634  | 69.2  | 7.71  | 40   | 99.9  | 104.3 | 112.8 | 92.5  | 97.4  | 93.1  |
| P35980 | Rpl18    | 60S ribosomal      | High   | 30 | 5  | 11  | 5  | 188  | 21.6  | 11.78 | 265  | 101.6 | 96.6  | 103.4 | 103.2 | 100   | 95.2  |
| O88322 | Nid2     | Nidogen-2          | High   | 5  | 6  | 7   | 6  | 1403 | 153.8 | 5.38  | 67   | 101.4 | 93.7  | 107.9 | 97.1  | 96.9  | 103   |
| Q80U49 | Cep170b  | Centrosomal        | High   | 16 | 22 | 24  | 20 | 1574 | 170.7 | 6.87  | 247  | 95.7  | 99    | 94.3  | 103   | 103.8 | 104.3 |
| Q80YV4 | Pank4    | 4'-                | High   | 3  | 2  | 2   | 2  | 820  | 91.5  | 6.71  | 48   | 102.4 | 100.4 | 93.8  | 100.4 | 103.9 | 99.1  |
| Q9QXY9 | Pex3     | Peroxisomal        | High   | 8  | 2  | 2   | 2  | 372  | 42.2  | 7.77  | 0    | 105.7 | 93.2  | 103.6 | 97    | 102.8 | 97.8  |
| Q8BIZ0 | Pcdh20   | Protocadherin-     | Low    | 1  | 1  | 1   | 1  | 952  | 104.7 | 5.12  | 0    | 88.5  | 101.6 | 95.1  | 116.9 | 104.1 | 93.9  |
| O55135 | Eif6     | Eukaryotic         | High   | 26 | 3  | 3   | 3  | 245  | 26.5  | 4.74  | 94   | 100.3 | 94    | 106.2 | 93.4  | 103.8 | 102.3 |
| O09114 | Ptgds    | Prostaglandin-     | High   | 13 | 2  | 3   | 2  | 189  | 21.1  | 8.25  | 50   | 91.2  | 95.5  | 92.8  | 102.5 | 110   | 108   |
| Q3UHC7 | Dab2ip   | Disabled           | High   | 7  | 9  | 12  | 6  | 1189 | 131.6 | 8.72  | 210  | 93.9  | 96.5  | 80.4  | 110.8 | 109.7 | 108.7 |
| Q9WTL7 | Lypla2   | Acyl-protein       | High   | 43 | 8  | 15  | 8  | 231  | 24.8  | 7.23  | 196  | 102.4 | 102   | 97.2  | 98    | 100.2 | 100.2 |
| Q91ZR2 | Snx18    | Sorting nexin-18   | High   | 7  | 4  | 4   | 4  | 614  | 67.9  | 6.67  | 47   | 103   | 105.5 | 106.9 | 90.1  | 102.2 | 92.4  |
| Q8CJG0 | Ago2     | Protein            | High   | 13 | 9  | 9   | 6  | 860  | 97.2  | 9.19  | 36   | 98.2  | 98.7  | 102.2 | 98.7  | 98.5  | 103.7 |
| P47955 | Rplp1    | 60S acidic         | High   | 75 | 3  | 7   | 3  | 114  | 11.5  | 4.32  | 199  | 105.8 | 99.3  | 112.7 | 97.4  | 89.9  | 94.9  |
| P63137 | Gabrb2   | Gamma-             | High   | 26 | 12 | 28  | 6  | 512  | 59.2  | 9.31  | 608  | 93.5  | 99.8  | 85.7  | 107.7 | 105.4 | 107.9 |
| Q61983 | Slc17a1  | Sodium-            | Low    | 7  | 1  | 1   | 1  | 465  | 51.6  | 8.43  | 0    |       |       |       |       |       |       |
| Q9JF0  | Nap1l5   | Nucleosome         | Medium | 8  | 1  | 1   | 1  | 156  | 17    | 4.32  | 0    | 83.3  | 99.4  | 85.1  | 112.8 | 113.2 | 106.2 |

|        |                 |                   |        |    |    |     |    |      |       |       |      |       |       |       |       |       |       |
|--------|-----------------|-------------------|--------|----|----|-----|----|------|-------|-------|------|-------|-------|-------|-------|-------|-------|
| O54784 | <i>Dapk3</i>    | Death-            | High   | 3  | 1  | 1   | 1  | 448  | 51.4  | 8.7   | 33   |       |       |       |       |       |       |
| P61290 | <i>Psma3</i>    | Proteasome        | High   | 20 | 4  | 8   | 4  | 254  | 29.5  | 5.95  | 189  | 99.2  | 95.8  | 101.2 | 103.6 | 100   | 100.3 |
| Q9CQK8 | <i>Lsm7</i>     | U6 snRNA-         | High   | 15 | 2  | 2   | 2  | 103  | 11.6  | 5.27  | 45   | 106.7 | 98.3  | 99.8  | 94.9  | 102.5 | 97.8  |
| Q921H9 | <i>Coa7</i>     | Cytochrome c      | High   | 18 | 4  | 6   | 4  | 231  | 25.6  | 6.29  | 111  | 95.1  | 98.2  | 86.9  | 105.8 | 101.2 | 112.8 |
| O54829 | <i>Rgs7</i>     | Regulator of G-   | High   | 25 | 10 | 18  | 8  | 469  | 54.8  | 8.13  | 419  | 96.4  | 102.6 | 87.2  | 105.9 | 106   | 101.8 |
| Q8CI94 | <i>Pygb</i>     | Glycogen          | High   | 49 | 39 | 103 | 32 | 843  | 96.7  | 6.73  | 1699 | 100.4 | 100.4 | 108.5 | 95.5  | 97.4  | 97.7  |
| Q920N7 | <i>Syt12</i>    | Synaptotagmin-    | High   | 32 | 12 | 17  | 12 | 421  | 46.7  | 5.64  | 271  | 98.9  | 99.3  | 93.6  | 105.1 | 100.5 | 102.6 |
| Q8N7N5 | <i>Dcaf8</i>    | DDB1- and         | High   | 7  | 3  | 3   | 3  | 591  | 66    | 5.87  | 60   | 97    | 103.1 | 100.1 | 104.4 | 97.1  | 98.3  |
| P97801 | <i>Smn1</i>     | Survival motor    | Low    | 2  | 1  | 1   | 1  | 288  | 31.2  | 7.62  | 14   | 100.1 | 99.5  | 98.2  | 98.8  | 107.4 | 96    |
| P14131 | <i>Rps16</i>    | 40S ribosomal     | High   | 55 | 9  | 18  | 9  | 146  | 16.4  | 10.21 | 323  | 104.3 | 102.7 | 107.2 | 97.2  | 96.3  | 92.3  |
| Q9JHR9 | <i>Nrip2</i>    | Nuclear           | High   | 9  | 2  | 2   | 2  | 270  | 29.3  | 7.68  | 50   | 88.9  | 99.3  | 83.8  | 120.7 | 95.2  | 112   |
| Q61301 | <i>Ctnna2</i>   | Catenin alpha-2   | High   | 45 | 34 | 56  | 27 | 953  | 105.2 | 5.71  | 1216 | 95    | 93.1  | 93.3  | 104.4 | 107.2 | 107   |
| Q8BVI4 | <i>Qdpr</i>     | Dihydropteridine  | High   | 54 | 9  | 20  | 9  | 241  | 25.6  | 7.81  | 561  | 102.8 | 115.3 | 105.6 | 95    | 90.7  | 90.6  |
| P98192 | <i>Gnpat</i>    | Dihydroxyacetone  | High   | 4  | 2  | 2   | 2  | 678  | 76.8  | 8.13  | 51   |       |       |       |       |       |       |
| Q3UPH7 | <i>Arhgef40</i> | Rho guanine       | Medium | 1  | 1  | 1   | 1  | 1517 | 165   | 5.55  | 0    | 102.4 | 105   | 91.9  | 97.5  | 102.6 | 100.6 |
| Q9R1P4 | <i>Psma1</i>    | Proteasome        | High   | 40 | 10 | 17  | 10 | 263  | 29.5  | 6.46  | 298  | 99.9  | 100.1 | 102   | 100.4 | 98.9  | 98.7  |
| P58771 | <i>Tpm1</i>     | Tropomyosin       | High   | 34 | 13 | 27  | 6  | 284  | 32.7  | 4.74  | 447  | 98.1  | 99.9  | 100   | 98.8  | 101.6 | 101.6 |
| Q9D819 | <i>Ppa1</i>     | Inorganic         | High   | 54 | 14 | 29  | 14 | 289  | 32.6  | 5.6   | 481  | 99.4  | 101.7 | 99.6  | 102.2 | 99.2  | 97.9  |
| Q9ER99 | <i>Rsc1a1</i>   | Regulatory        | Low    | 2  | 1  | 1   | 1  | 582  | 61.2  | 4.78  | 0    | 85.9  | 88.1  | 85.8  | 105.7 | 116.4 | 118   |
| Q9Z2D3 | <i>Gsdme</i>    | Gasdermin-E       | High   | 14 | 5  | 5   | 5  | 512  | 56.6  | 5.39  | 129  | 93.4  | 102.8 | 90.2  | 108.6 | 99.7  | 105.3 |
| P97445 | <i>Cacna1a</i>  | Voltage-          | High   | 4  | 9  | 11  | 8  | 2368 | 267.5 | 8.85  | 129  | 92.2  | 97.8  | 85.1  | 112.1 | 107.2 | 105.7 |
| Q9D7J4 | <i>Cox20</i>    | Cytochrome c      | High   | 12 | 1  | 1   | 1  | 117  | 13.2  | 9.01  | 27   |       |       |       |       |       |       |
| P35821 | <i>Ptpn1</i>    | Tyrosine-protein  | High   | 15 | 6  | 7   | 6  | 432  | 49.6  | 6.16  | 48   | 104.5 | 99.1  | 117.4 | 95.5  | 90.1  | 93.5  |
| Q9D404 | <i>Oxsm</i>     | 3-oxoacyl-[acyl-  | High   | 8  | 3  | 3   | 3  | 459  | 48.6  | 7.06  | 30   | 91.9  | 109.8 | 79.3  | 104.6 | 112.7 | 101.7 |
| P97760 | <i>Polr2c</i>   | DNA-directed      | High   | 11 | 2  | 3   | 2  | 275  | 31.4  | 4.92  | 50   | 99.8  | 99    | 100.4 | 93.8  | 101.8 | 105.1 |
| Q920R0 | <i>Als2</i>     | Alsin OS=Mus      | High   | 3  | 3  | 3   | 3  | 1651 | 182.5 | 6.3   | 83   | 93.8  | 95.3  | 94.4  | 107.7 | 97.8  | 111   |
| Q8BXR9 | <i>Osbp16</i>   | Oxysterol-        | High   | 8  | 7  | 9   | 7  | 959  | 108.9 | 7.27  | 108  | 101.6 | 93.1  | 97.4  | 103.1 | 101   | 103.8 |
| Q69ZW3 | <i>Ehbp1</i>    | EH domain-        | High   | 14 | 14 | 16  | 14 | 1231 | 139   | 5.38  | 247  | 96.5  | 98.5  | 94.2  | 104.8 | 101.4 | 104.7 |
| Q99K48 | <i>Nono</i>     | Non-POU           | High   | 23 | 11 | 24  | 10 | 473  | 54.5  | 8.95  | 271  | 98.3  | 96.7  | 100.2 | 100.9 | 102.4 | 101.5 |
| Q6NVE8 | <i>Wdr44</i>    | WD repeat-        | High   | 20 | 14 | 17  | 14 | 915  | 101.5 | 5.24  | 222  | 97.4  | 98.4  | 101.6 | 101.9 | 99.6  | 101   |
| P42125 | <i>Eci1</i>     | Enoyl-CoA delta   | High   | 26 | 6  | 10  | 6  | 289  | 32.2  | 8.98  | 294  | 101.8 | 107.8 | 105   | 94.9  | 95.4  | 95.1  |
| O89023 | <i>Tpp1</i>     | Tripeptidyl-      | High   | 1  | 1  | 2   | 1  | 562  | 61.3  | 6.57  | 30   | 110.5 | 102.9 | 114.2 | 83.2  | 89.4  | 99.8  |
| O70250 | <i>Pgam2</i>    | Phosphoglycerat   | High   | 20 | 6  | 18  | 2  | 253  | 28.8  | 8.5   | 315  | 81.6  | 90.8  | 103   | 112.1 | 110.1 | 102.4 |
| Q8VCD6 | <i>Reep2</i>    | Receptor          | High   | 39 | 8  | 9   | 8  | 254  | 28.4  | 9.41  | 194  | 93.4  | 95.1  | 87    | 105.6 | 107.6 | 111.3 |
| Q4U2R1 | <i>Herc2</i>    | E3 ubiquitin-     | High   | 0  | 2  | 2   | 2  | 4836 | 527.1 | 6.27  | 29   |       |       |       |       |       |       |
| Q9R1Z8 | <i>Sorbs3</i>   | Vinexin OS=Mus    | High   | 3  | 2  | 2   | 2  | 733  | 82.3  | 9.2   | 25   | 102.4 | 97.7  | 143.5 | 82.4  | 87.6  | 86.3  |
| Q62273 | <i>Slc26a2</i>  | Sulfate           | Low    | 1  | 1  | 1   | 1  | 739  | 81.6  | 8.13  | 22   | 95    | 93.5  | 102.2 | 109.6 | 99.2  | 100.5 |
| Q922Q1 | <i>Mtarc2</i>   | Mitochondrial     | High   | 22 | 9  | 17  | 9  | 338  | 38.2  | 8.68  | 258  | 100   | 105.8 | 101   | 99.1  | 98.4  | 95.7  |
| Q9Z1Q9 | <i>Vars1</i>    | Valine--tRNA      | High   | 25 | 24 | 33  | 24 | 1263 | 140.1 | 7.77  | 483  | 99.4  | 99.1  | 102.9 | 98.9  | 98.6  | 101.2 |
| Q9EQN3 | <i>Tsc22d4</i>  | TSC22 domain      | High   | 15 | 5  | 7   | 3  | 387  | 40    | 8.13  | 92   | 94.3  | 135.1 | 99.8  | 62.4  | 111.1 | 97.3  |
| O54984 | <i>Get3</i>     | ATPase GET3       | High   | 21 | 6  | 11  | 6  | 348  | 38.8  | 4.91  | 111  | 98.4  | 101.6 | 94.5  | 102.8 | 100   | 102.8 |
| P17426 | <i>Ap2a1</i>    | AP-2 complex      | High   | 55 | 49 | 126 | 34 | 977  | 107.6 | 7.03  | 2269 | 95.9  | 101.7 | 89    | 106.1 | 103.6 | 103.7 |
| Q80TE0 | <i>Rpap1</i>    | RNA polymerase    | High   | 2  | 2  | 2   | 2  | 1409 | 155.2 | 6.65  | 36   | 104.9 | 102.2 | 118.1 | 84.6  | 89.6  | 100.7 |
| P61961 | <i>Ufm1</i>     | Ubiquitin-fold    | High   | 51 | 2  | 6   | 2  | 85   | 9.1   | 9.31  | 142  | 96.5  | 96.3  | 94.5  | 112.3 | 103   | 97.3  |
| Q8JZS0 | <i>Lin7a</i>    | Protein lin-7     | High   | 44 | 8  | 17  | 4  | 233  | 26    | 8.72  | 323  | 99.7  | 103.2 | 90.2  | 104.1 | 100.3 | 102.5 |
| Q9CQS8 | <i>Sec61b</i>   | Protein transport | High   | 29 | 3  | 4   | 3  | 96   | 10    | 11.56 | 71   | 105.7 | 106.6 | 107.2 | 93.2  | 95.2  | 91.9  |
| Q9Z2S7 | <i>Tsc22d3</i>  | TSC22 domain      | High   | 30 | 3  | 6   | 1  | 137  | 15.2  | 4.53  | 91   | 90.9  | 109.7 | 82    | 93.3  | 109.3 | 114.8 |
| Q8C170 | <i>Myo9a</i>    | Unconventional    | High   | 1  | 2  | 2   | 2  | 2542 | 291.9 | 8.97  | 23   | 91    | 87.7  | 105.4 | 110.5 | 120   | 85.4  |
| Q922F4 | <i>Tubb6</i>    | Tubulin beta-6    | High   | 30 | 13 | 189 | 1  | 447  | 50.1  | 4.89  | 3602 |       |       |       |       |       |       |
| Q8BIJ6 | <i>Iars2</i>    | Isoleucine--tRNA  | High   | 26 | 21 | 34  | 21 | 1012 | 112.7 | 6.81  | 761  | 98.6  | 104.6 | 93.1  | 102.8 | 101.1 | 99.8  |
| O35166 | <i>Gosr2</i>    | Golgi SNAP        | Medium | 5  | 1  | 1   | 1  | 212  | 24.7  | 8.21  | 0    |       |       |       |       |       |       |
| P20152 | <i>Vim</i>      | Vimentin          | High   | 61 | 30 | 72  | 21 | 466  | 53.7  | 5.12  | 1557 | 141.5 | 124.7 | 192.7 | 43    | 47.6  | 50.4  |
| P54754 | <i>Ephb3</i>    | Ephrin type-B     | High   | 11 | 9  | 13  | 6  | 993  | 109.6 | 6.28  | 140  | 92.8  | 113.7 | 86.3  | 104.1 | 99.9  | 103.3 |
| Q6PB66 | <i>Lrpprc</i>   | Leucine-rich      | High   | 36 | 44 | 63  | 44 | 1392 | 156.5 | 6.83  | 1114 | 96.8  | 100.2 | 94.5  | 108.4 | 98.9  | 101.3 |
| Q3UBX0 | <i>Tmem109</i>  | Transmembrane     | High   | 12 | 3  | 4   | 3  | 243  | 26.3  | 9.89  | 83   | 100   | 103.4 | 95.8  | 101.5 | 102.7 | 96.6  |
| Q9D8V7 | <i>Sec11c</i>   | Signal peptidase  | High   | 15 | 2  | 2   | 2  | 192  | 21.6  | 9.23  | 33   | 97.6  | 95    | 94.4  | 100   | 99.9  | 113   |
| Q7TPV4 | <i>Mybbp1a</i>  | Myb-binding       | High   | 4  | 5  | 7   | 5  | 1344 | 151.9 | 8.95  | 172  | 101.4 | 99.1  | 107.1 | 101   | 93.1  | 98.3  |
| P97789 | <i>Xrn1</i>     | 5'-3'             | High   | 1  | 2  | 2   | 2  | 1719 | 194.2 | 7.5   | 51   | 95.5  | 94.1  | 97.5  | 93.8  | 104.7 | 114.4 |
| P30875 | <i>Sstr2</i>    | Somatostatin      | Medium | 2  | 1  | 1   | 1  | 369  | 41.2  | 8.97  | 33   | 99.6  | 97.7  | 95.2  | 115.1 | 96.5  | 95.8  |
| Q8CGA0 | <i>Ppm1f</i>    | Protein           | High   | 8  | 3  | 5   | 3  | 452  | 49.6  | 5.3   | 100  | 98.5  | 94.9  | 98.9  | 102.3 | 105.7 | 99.6  |
| Q8BHJ7 | <i>Gabra5</i>   | Gamma-            | High   | 6  | 3  | 4   | 1  | 463  | 52.2  | 9.01  | 78   | 92.3  | 107.7 | 98.8  | 91.3  | 89.9  | 120   |
| P62858 | <i>Rps28</i>    | 40S ribosomal     | High   | 46 | 3  | 5   | 3  | 69   | 7.8   | 10.7  | 115  | 100.6 | 103.1 | 90.5  | 104.1 | 102.4 | 99.3  |
| P34152 | <i>Ptk2</i>     | Focal adhesion    | High   | 20 | 16 | 22  | 16 | 1052 | 119.2 | 6.62  | 365  | 99.5  | 100.9 | 94.3  | 104.2 | 100.8 | 100.2 |
| Q9CZY3 | <i>Ube2v1</i>   | Ubiquitin-        | High   | 50 | 7  | 16  | 2  | 147  | 16.3  | 7.96  | 253  | 100.5 | 101.9 | 93.5  | 100.8 | 100.6 | 102.7 |
| P01639 | <i>Gm5571</i>   | Ig kappa chain    | High   | 16 | 1  | 1   | 1  | 130  | 14.3  | 5.48  | 23   | 119.2 | 95    | 130.2 | 83.5  | 76.7  | 95.4  |
| Q9CPX7 | <i>Mrps16</i>   | 28S ribosomal     | High   | 6  | 1  | 1   | 1  | 135  | 15.2  | 9.67  | 30   |       |       |       |       |       |       |
| Q8VCX6 | <i>Kptn</i>     | KICSTOR           | Medium | 2  | 1  | 1   | 1  | 430  | 47.5  | 5     | 25   | 101   | 95.3  | 95.9  | 103.7 | 100.1 | 104   |
| Q8CE50 | <i>Snx30</i>    | Sorting nexin-30  | High   | 17 | 8  | 9   | 8  | 437  | 49.5  | 5.35  | 80   | 93.8  | 96.9  | 96.3  | 101.7 | 107.8 | 103.6 |

|        |                 |                   |        |    |    |    |    |      |       |       |      |       |       |       |       |       |       |
|--------|-----------------|-------------------|--------|----|----|----|----|------|-------|-------|------|-------|-------|-------|-------|-------|-------|
| Q9DCT8 | <i>Crip2</i>    | Cysteine-rich     | High   | 34 | 3  | 8  | 3  | 208  | 22.7  | 8.63  | 208  | 100.6 | 103   | 98.5  | 101.5 | 99.5  | 96.9  |
| O35188 | <i>Cx3c1</i>    | Fractalkine       | High   | 7  | 2  | 2  | 2  | 395  | 42.1  | 5.54  | 63   | 89.1  | 94.6  | 86.7  | 107.6 | 112.2 | 109.8 |
| P11881 | <i>Itp1</i>     | Inositol 1,4,5-   | High   | 17 | 39 | 43 | 32 | 2749 | 313   | 6.04  | 569  | 95.9  | 106.2 | 88.2  | 103.1 | 102   | 104.6 |
| Q9R045 | <i>Angptl2</i>  | Angiopoietin-     | Medium | 3  | 1  | 1  | 1  | 493  | 57.1  | 7.75  | 14   |       |       |       |       |       |       |
| Q5DTL9 | <i>Slc4a10</i>  | Sodium-driven     | High   | 18 | 18 | 30 | 14 | 1118 | 125.7 | 6.51  | 607  | 94.7  | 96.5  | 90.7  | 110   | 107.1 | 101   |
| Q62WV7 | <i>Rpl35</i>    | 60S ribosomal     | High   | 28 | 4  | 5  | 4  | 123  | 14.5  | 11.05 | 91   | 105.9 | 97    | 103   | 97.9  | 99.8  | 96.3  |
| O54916 | <i>Reps1</i>    | RalBP1-           | High   | 12 | 6  | 6  | 5  | 795  | 86.5  | 5.58  | 90   | 95.6  | 104.8 | 106.5 | 93.8  | 93.3  | 106   |
| Q8CHS8 | <i>Vps37a</i>   | Vacuolar protein  | High   | 5  | 2  | 2  | 2  | 397  | 44.4  | 5.67  | 41   | 93.4  | 97.4  | 97.1  | 96.3  | 86.4  | 129.5 |
| Q9D554 | <i>Sf3a3</i>    | Splicing factor   | High   | 19 | 8  | 10 | 8  | 501  | 58.8  | 5.34  | 126  | 100.1 | 96.7  | 104.5 | 100.6 | 98.1  | 99.9  |
| P70295 | <i>Aup1</i>     | Lipid droplet-    | Low    | 2  | 1  | 1  | 1  | 410  | 46.1  | 8.4   | 0    |       |       |       |       |       |       |
| Q52KR3 | <i>Prune2</i>   | Protein prune     | Medium | 0  | 1  | 1  | 1  | 3084 | 339.3 | 4.46  | 20   | 104.3 | 105.2 | 84.2  | 97.6  | 102.4 | 106.2 |
| P39749 | <i>Fen1</i>     | Flap              | Low    | 2  | 1  | 1  | 1  | 378  | 42.3  | 8.34  | 0    | 108.1 | 95.5  | 126.2 | 92.5  | 91.2  | 86.4  |
| P60904 | <i>Dnajc5</i>   | DnaJ homolog      | High   | 32 | 6  | 14 | 6  | 198  | 22.1  | 5.07  | 483  | 101.2 | 100.8 | 92.7  | 102.6 | 104.7 | 98.1  |
| P11835 | <i>Irgb2</i>    | Integrin beta-2   | High   | 6  | 4  | 4  | 4  | 771  | 85    | 7.12  | 59   | 121.7 | 107.5 | 142.1 | 67.9  | 77.6  | 83.3  |
| O70492 | <i>Snx3</i>     | Sorting nexin-3   | High   | 44 | 8  | 11 | 6  | 162  | 18.7  | 8.66  | 135  | 99.2  | 99.4  | 101.8 | 100.2 | 97.7  | 101.7 |
| P61148 | <i>Fgf1</i>     | Fibroblast growth | High   | 21 | 3  | 3  | 3  | 155  | 17.4  | 7.02  | 23   | 96.6  | 99.1  | 97.2  | 104.6 | 103.8 | 98.6  |
| Q62422 | <i>Ostf1</i>    | Osteoclast-       | Medium | 6  | 1  | 1  | 1  | 215  | 23.8  | 5.68  | 16   |       |       |       |       |       |       |
| Q6PDL0 | <i>Dync1li2</i> | Cytoplasmic       | High   | 32 | 13 | 20 | 13 | 492  | 54.2  | 6.28  | 420  | 100.5 | 104.5 | 92.9  | 103   | 98.3  | 100.9 |
| Q3TWL2 | <i>Pip4p1</i>   | Type 1            | High   | 8  | 2  | 2  | 2  | 284  | 30    | 8.82  | 34   | 92.9  | 93.2  | 102.3 | 103.1 | 100.9 | 107.6 |
| Q3UQN2 | <i>Fcho2</i>    | F-BAR domain      | Medium | 2  | 1  | 1  | 1  | 809  | 88.7  | 6.89  | 16   |       |       |       |       |       |       |
| Q6P1F6 | <i>Ppp2r2a</i>  | Serine/threonine  | High   | 43 | 13 | 22 | 6  | 447  | 51.7  | 6.2   | 482  | 97.2  | 95.9  | 96.1  | 101.5 | 105.2 | 104.2 |
| Q6P1I6 | <i>Psd2</i>     | PH and SEC7       | High   | 3  | 2  | 2  | 2  | 770  | 84.2  | 5.21  | 27   | 94.1  | 100.6 | 99    | 99    | 100.1 | 107.1 |
| Q921C1 | <i>Gjc3</i>     | Gap junction      | High   | 9  | 2  | 2  | 2  | 269  | 30.3  | 8.37  | 21   | 90.1  | 114.9 | 88.4  | 100.5 | 103.6 | 102.5 |
| P59325 | <i>Eif5</i>     | Eukaryotic        | High   | 22 | 8  | 13 | 8  | 429  | 48.9  | 5.52  | 169  | 96.4  | 101.2 | 95    | 106.2 | 99.2  | 101.9 |
| Q8C8T7 | <i>Elfn1</i>    | Protein ELFN1     | High   | 4  | 2  | 2  | 1  | 828  | 90.8  | 8.18  | 21   | 103.5 | 105.3 | 93.6  | 103.8 | 100   | 93.8  |
| Q9EST4 | <i>Psmg2</i>    | Proteasome        | High   | 11 | 3  | 3  | 3  | 264  | 29.5  | 6.05  | 41   | 91.6  | 103.6 | 84.1  | 101.5 | 99.1  | 120   |
| Q3URD3 | <i>Smap</i>     | Sarcolemmal       | High   | 11 | 8  | 8  | 8  | 845  | 96.9  | 5.33  | 132  | 93.7  | 103   | 101   | 98.4  | 99.9  | 103.9 |
| Q8QZT1 | <i>Acat1</i>    | Acetyl-CoA        | High   | 58 | 19 | 52 | 19 | 424  | 44.8  | 8.51  | 1074 | 94.7  | 97    | 90    | 103.6 | 108.2 | 106.6 |
| Q9D1A2 | <i>Cndp2</i>    | Cytosolic non-    | High   | 53 | 19 | 36 | 19 | 475  | 52.7  | 5.66  | 646  | 104.2 | 102   | 107.6 | 94.4  | 94.7  | 97.1  |
| Q8BTJ4 | <i>Enpp4</i>    | Bis(5'-adenosyl)- | High   | 5  | 2  | 2  | 2  | 456  | 51.6  | 6.73  | 40   | 100.3 | 106   | 115.8 | 92.5  | 93    | 92.4  |
| Q9WV91 | <i>Ptgfrn</i>   | Prostaglandin F2  | High   | 8  | 5  | 5  | 5  | 879  | 98.7  | 6.61  | 42   | 101.4 | 97.1  | 106.7 | 99.3  | 95.3  | 100.1 |
| Q99JP7 | <i>Ggt7</i>     | Glutathione       | High   | 27 | 11 | 13 | 11 | 662  | 70.2  | 5.06  | 172  | 101.4 | 101.5 | 102.8 | 98.3  | 98.9  | 97    |
| Q66L44 | <i>Cbarp</i>    | Voltage-          | High   | 5  | 3  | 4  | 3  | 698  | 74.1  | 6.33  | 70   | 96.9  | 98.5  | 92.5  | 95.5  | 105   | 111.6 |
| Q9WV96 | <i>Timm10b</i>  | Mitochondrial     | High   | 24 | 2  | 2  | 2  | 100  | 11.3  | 7.08  | 65   | 91    | 105.3 | 101.3 | 103.5 | 99.7  | 99.2  |
| Q61830 | <i>Mrc1</i>     | Macrophage        | Medium | 1  | 1  | 1  | 1  | 1456 | 164.9 | 6.83  | 0    | 104.2 | 107.1 | 103.5 | 95.8  | 95.5  | 93.9  |
| Q9CPW7 | <i>Zmat2</i>    | Zinc finger       | Medium | 4  | 1  | 1  | 1  | 199  | 23.6  | 9.01  | 0    | 94.4  | 99    | 99.1  | 101.4 | 107.9 | 98.1  |
| P23506 | <i>Pcmt1</i>    | Protein-L-        | High   | 61 | 11 | 23 | 11 | 227  | 24.6  | 7.65  | 395  | 95.7  | 101.3 | 91.4  | 103.2 | 105.8 | 102.6 |
| Q9JLI6 | <i>Scly</i>     | Selenocysteine    | High   | 3  | 1  | 2  | 1  | 432  | 47.1  | 6.8   | 43   | 103.3 | 97.4  | 102.6 | 87.8  | 105.3 | 103.6 |
| Q8BYW1 | <i>Arhgap25</i> | Rho GTPase-       | High   | 6  | 4  | 5  | 3  | 648  | 73.3  | 6.38  | 40   | 99.7  | 100.3 | 95.4  | 101.4 | 97.3  | 105.8 |
| Q91W67 | <i>Ubl7</i>     | Ubiquitin-like    | Low    | 3  | 1  | 1  | 1  | 380  | 40.4  | 5.01  | 0    |       |       |       |       |       |       |
| Q8K310 | <i>Matr3</i>    | Matrin-3          | High   | 26 | 19 | 30 | 19 | 846  | 94.6  | 6.25  | 483  | 97.6  | 96.9  | 97.1  | 103.8 | 101.6 | 102.9 |
| Q80TT2 | <i>Baiap3</i>   | BAI1-associated   | Low    | 1  | 1  | 1  | 1  | 1134 | 127   | 6.2   | 0    | 132.6 | 123.3 | 81.9  | 94.5  | 85    | 82.8  |
| P24547 | <i>Impdh2</i>   | Inosine-5'-       | High   | 16 | 6  | 7  | 6  | 514  | 55.8  | 7.28  | 152  | 99.2  | 96.8  | 99.8  | 99.5  | 106.1 | 98.6  |
| Q80ZU0 | <i>Arl5a</i>    | ADP-ribosylation  | High   | 13 | 2  | 4  | 2  | 179  | 20.7  | 6.79  | 67   | 101.3 | 100.6 | 97.9  | 99.1  | 99.6  | 101.6 |
| Q8VDQ1 | <i>Ptgr2</i>    | Prostaglandin     | High   | 6  | 2  | 2  | 2  | 351  | 38    | 5.41  | 19   | 95.8  | 103.8 | 94    | 95.6  | 108   | 102.8 |
| P31230 | <i>Aimp1</i>    | Aminoacyl tRNA    | High   | 26 | 6  | 8  | 6  | 310  | 34    | 8.35  | 112  | 98.7  | 99.6  | 100.5 | 97.5  | 97.3  | 106.5 |
| O35304 | <i>Slc18a3</i>  | Vesicular         | Medium | 3  | 1  | 1  | 1  | 530  | 56.6  | 6.01  | 19   | 94    | 103.3 | 85.1  | 113.1 | 102   | 102.5 |
| Q3UXZ6 | <i>Fam81a</i>   | Protein FAM81A    | High   | 34 | 12 | 12 | 12 | 364  | 41.7  | 8.75  | 116  | 97.1  | 98    | 90.1  | 103.2 | 106.2 | 105.4 |
| P63330 | <i>Ppp2ca</i>   | Serine/threonine  | High   | 47 | 10 | 21 | 1  | 309  | 35.6  | 5.54  | 454  | 93.3  | 96    | 105.2 | 101.8 | 99    | 104.7 |
| P15105 | <i>Glul</i>     | Glutamine         | High   | 44 | 15 | 69 | 15 | 373  | 42.1  | 7.08  | 977  | 95.4  | 104.9 | 93.7  | 104.4 | 99.5  | 102.1 |
| Q99MI1 | <i>Erc1</i>     | ELKS/Rab6-        | High   | 22 | 25 | 32 | 15 | 1120 | 128.3 | 5.87  | 419  | 94.5  | 98    | 98.1  | 100   | 102.4 | 106.9 |
| Q9CPZ8 | <i>Cmc1</i>     | COX assembly      | Medium | 9  | 1  | 1  | 1  | 106  | 12.5  | 8.24  | 18   | 83.6  | 96    | 94.8  | 108.2 | 111.3 | 106.2 |
| P12265 | <i>Gusb</i>     | Beta-             | High   | 10 | 4  | 4  | 4  | 648  | 74.1  | 6.7   | 42   | 107.3 | 99.6  | 119.5 | 88.5  | 90.2  | 94.9  |
| Q9CZL5 | <i>Pcbd2</i>    | Pterin-4-alpha-   | High   | 13 | 2  | 3  | 2  | 136  | 14.8  | 9.16  | 31   |       |       |       |       |       |       |
| Q8C5Q4 | <i>Grsf1</i>    | G-rich sequence   | High   | 4  | 1  | 1  | 1  | 479  | 53    | 6.67  | 29   | 86.6  | 97.6  | 89.3  | 107.5 | 113.8 | 105.3 |
| Q9Z2D8 | <i>Mbd3</i>     | Methyl-CpG-       | High   | 5  | 1  | 1  | 1  | 285  | 32.1  | 5.82  | 27   | 98.5  | 97.1  | 90.3  | 99.2  | 98.5  | 116.3 |
| P54775 | <i>Psmc4</i>    | 26S proteasome    | High   | 41 | 13 | 19 | 13 | 418  | 47.4  | 5.21  | 409  | 98.6  | 98.8  | 96.5  | 100.2 | 104.5 | 101.3 |
| O55201 | <i>Supt5h</i>   | Transcription     | High   | 7  | 5  | 5  | 5  | 1082 | 120.6 | 5.05  | 82   | 102.2 | 98    | 103.7 | 97.5  | 99.2  | 99.4  |
| Q9D6K7 | <i>Ttc33</i>    | Tetratricopeptide | High   | 7  | 1  | 1  | 1  | 262  | 29.4  | 5.35  | 29   | 96    | 108.7 | 84.8  | 108.5 | 101   | 101   |
| P97492 | <i>Rgs14</i>    | Regulator of G-   | High   | 23 | 9  | 11 | 9  | 547  | 59.8  | 7.43  | 121  | 94.3  | 96    | 112.4 | 93.3  | 100   | 103.9 |
| B2RSH2 | <i>Gnai1</i>    | Guanine           | High   | 37 | 10 | 32 | 6  | 354  | 40.3  | 5.97  | 676  | 100.5 | 101.2 | 93.9  | 100.2 | 103.3 | 100.9 |
| Q8BGD8 | <i>Coa6</i>     | Cytochrome c      | High   | 33 | 2  | 2  | 2  | 79   | 9.3   | 8.16  | 27   | 105.7 | 87.9  | 109.5 | 106.2 | 87.6  | 103   |
| Q9EQJ9 | <i>Magi3</i>    | Membrane-         | High   | 3  | 4  | 5  | 4  | 1476 | 161.6 | 8.05  | 60   | 99.6  | 90.5  | 102.2 | 103.8 | 101.9 | 102   |
| Q9CZ28 | <i>Snf8</i>     | Vacuolar-sorting  | High   | 23 | 5  | 8  | 5  | 258  | 28.9  | 6.65  | 156  | 97.3  | 98.3  | 104.9 | 99.4  | 104.7 | 95.4  |
| Q8BML9 | <i>Qars1</i>    | Glutamine--tRNA   | High   | 13 | 9  | 12 | 9  | 775  | 87.6  | 7.31  | 219  | 103   | 101.1 | 108.1 | 95    | 96.1  | 96.7  |
| Q9QYR9 | <i>Acot2</i>    | Acyl-coenzyme     | High   | 20 | 8  | 12 | 2  | 453  | 49.6  | 7.36  | 265  | 102.7 | 92.8  | 103.5 | 95.7  | 101.8 | 103.4 |
| P62996 | <i>Tra2b</i>    | Transformer-2     | High   | 20 | 5  | 9  | 5  | 288  | 33.6  | 11.25 | 90   | 108.8 | 95.1  | 107   | 91.3  | 98.3  | 99.5  |
| Q60899 | <i>Elavl2</i>   | ELAV-like         | High   | 31 | 10 | 15 | 2  | 360  | 39.6  | 9.13  | 345  | 87.3  | 96    | 88.5  | 109.4 | 94.7  | 124.1 |

|        |                  |                   |        |    |    |     |    |      |        |       |       |       |       |       |       |       |       |
|--------|------------------|-------------------|--------|----|----|-----|----|------|--------|-------|-------|-------|-------|-------|-------|-------|-------|
| Q8CB44 | <i>Gramd4</i>    | GRAM domain-      | High   | 5  | 2  | 2   | 2  | 633  | 72.2   | 9.07  | 47    |       |       |       |       |       |       |
| Q62093 | <i>Srsf2</i>     | Serine/arginine-  | High   | 24 | 4  | 6   | 4  | 221  | 25.5   | 11.85 | 110   | 97.5  | 98.3  | 100.4 | 103.6 | 99.5  | 100.7 |
| P53612 | <i>Rabggtb</i>   | Geranylgeranyl    | High   | 13 | 4  | 5   | 4  | 339  | 37.8   | 5.16  | 32    | 97.4  | 104.1 | 95.2  | 108.2 | 96    | 99.1  |
| Q9DCW4 | <i>Etfb</i>      | Electron transfer | High   | 56 | 14 | 27  | 14 | 255  | 27.6   | 8.1   | 413   | 98.5  | 103.6 | 100   | 99.3  | 101   | 97.6  |
| Q77PM6 | <i>Fsd1</i>      | Fibronectin type  | High   | 28 | 11 | 13  | 11 | 496  | 55.5   | 6.67  | 222   | 93.3  | 96.5  | 91.1  | 104.9 | 106.2 | 108   |
| Q9QXT8 | <i>Kcnp3</i>     | Calsenilin        | High   | 10 | 2  | 2   | 2  | 256  | 29.4   | 5.69  | 19    | 97.8  | 107.9 | 95.5  | 104.8 | 96.3  | 97.6  |
| Q8BI08 | <i>Mal2</i>      | Protein MAL2      | High   | 18 | 2  | 8   | 2  | 175  | 19.1   | 6.49  | 279   | 94.7  | 111.6 | 89    | 106.7 | 102   | 96    |
| Q9D287 | <i>Bcas2</i>     | Pre-mRNA-         | High   | 36 | 5  | 6   | 5  | 225  | 26.1   | 5.66  | 152   | 100.7 | 93.8  | 102   | 100.3 | 100.2 | 103.1 |
| Q9WV60 | <i>Gsk3b</i>     | Glycogen          | High   | 48 | 14 | 28  | 11 | 420  | 46.7   | 8.78  | 404   | 93.8  | 95.5  | 93.1  | 107.8 | 103.4 | 106.5 |
| Q7TNP2 | <i>Ppp2r1b</i>   | Serine/threonine  | High   | 14 | 6  | 17  | 2  | 601  | 65.9   | 5.1   | 399   | 96.2  | 91.7  | 92.9  | 104.6 | 107.3 | 107.3 |
| Q6ZWR6 | <i>Syne1</i>     | Nesprin-1         | High   | 7  | 45 | 49  | 45 | 8799 | 1009.3 | 5.59  | 747   | 93.9  | 98.1  | 89.9  | 108.4 | 104.9 | 104.7 |
| P56135 | <i>Atp5mf</i>    | ATP synthase      | High   | 34 | 3  | 14  | 3  | 88   | 10.3   | 9.95  | 167   | 96    | 106.3 | 88.8  | 107.2 | 100.3 | 101.5 |
| Q91V09 | <i>Wdr13</i>     | WD repeat-        | High   | 17 | 6  | 7   | 6  | 485  | 53.6   | 9.14  | 159   | 95.6  | 99.2  | 87.6  | 105.8 | 107.6 | 104.2 |
| P21619 | <i>Lmnb2</i>     | Lamin-B2          | High   | 41 | 23 | 31  | 19 | 596  | 67.3   | 5.5   | 664   | 102.8 | 98.6  | 102.5 | 98.5  | 99.4  | 98.3  |
| Q9EPN1 | <i>Nbea</i>      | Neurobeachin      | High   | 22 | 46 | 62  | 41 | 2936 | 326.5  | 6.2   | 973   | 95.3  | 98.7  | 91.2  | 102.5 | 108   | 104.3 |
| Q91X72 | <i>Hpx</i>       | Hemopexin         | High   | 52 | 19 | 47  | 19 | 460  | 51.3   | 7.8   | 819   | 196.1 | 67.2  | 206.5 | 42.7  | 43.1  | 44.4  |
| Q9D3A8 | <i>Nos1ap</i>    | Carboxyl-         | Low    | 2  | 1  | 1   | 1  | 503  | 55.8   | 6.09  | 17    | 97.2  | 109.8 | 95.4  | 100.4 | 98.6  | 98.6  |
| A2AN08 | <i>Ubr4</i>      | E3 ubiquitin-     | High   | 7  | 32 | 37  | 32 | 5180 | 571.9  | 6.06  | 511   | 100.9 | 98.5  | 97.9  | 99.6  | 100   | 103.1 |
| Q8K2V6 | <i>lpo11</i>     | Importin-11       | Medium | 1  | 1  | 1   | 1  | 975  | 112.3  | 5.26  | 0     |       |       |       |       |       |       |
| Q61879 | <i>Myh10</i>     | Myosin-10         | High   | 46 | 85 | 162 | 66 | 1976 | 228.9  | 5.54  | 3619  | 96.2  | 99.6  | 92.9  | 102.4 | 104.1 | 104.7 |
| Q9CSN1 | <i>Snw1</i>      | SNW domain-       | High   | 9  | 3  | 3   | 3  | 536  | 61.4   | 9.48  | 79    | 91.4  | 96.8  | 102.4 | 104.4 | 99.4  | 105.6 |
| P68368 | <i>Tuba4a</i>    | Tubulin alpha-4A  | High   | 58 | 22 | 519 | 5  | 448  | 49.9   | 5.06  | 10244 | 97.2  | 109.5 | 93.7  | 102.8 | 95.6  | 101.2 |
| Q80VL1 | <i>Tdrkh</i>     | Tudor and KH      | High   | 9  | 3  | 4   | 3  | 560  | 62.1   | 4.94  | 71    | 92.4  | 97.3  | 96    | 106.3 | 109.3 | 98.7  |
| Q923L3 | <i>Csmd1</i>     | CUB and sushi     | High   | 0  | 1  | 2   | 1  | 3564 | 387.6  | 6.1   | 46    | 102.3 | 97.5  | 87.3  | 107.4 | 104.9 | 100.5 |
| Q920I9 | <i>Wdr7</i>      | WD repeat-        | High   | 24 | 29 | 47  | 29 | 1489 | 163.3  | 6.9   | 842   | 94.5  | 99.5  | 91.3  | 104.7 | 103.8 | 106.3 |
| Q9CQI3 | <i>Gmfb</i>      | Glia maturation   | High   | 54 | 6  | 10  | 6  | 142  | 16.7   | 5.16  | 295   | 92.5  | 96.2  | 97.8  | 100.5 | 106.1 | 106.8 |
| Q9D7I5 | <i>Lhpp</i>      | Phospholysine     | High   | 9  | 2  | 2   | 2  | 270  | 29.1   | 5.1   | 67    | 92.4  | 95.2  | 105.3 | 103.4 | 97.7  | 106.1 |
| Q9JK81 | <i>Myg1</i>      | MYG1              | High   | 6  | 2  | 2   | 2  | 380  | 42.7   | 7.02  | 41    | 105   | 96.5  | 97.6  | 103.5 | 86.6  | 110.8 |
| Q8VEM8 | <i>Slc25a3</i>   | Phosphate         | High   | 32 | 12 | 35  | 12 | 357  | 39.6   | 9.26  | 398   | 98.7  | 105.4 | 91.1  | 102.7 | 103   | 99.1  |
| Q9DCF9 | <i>Ssr3</i>      | Translocon-       | High   | 8  | 1  | 1   | 1  | 185  | 21.1   | 9.61  | 38    | 85.9  | 109.8 | 82.6  | 84.5  | 111.5 | 125.7 |
| Q9JJ28 | <i>Flii</i>      | Protein           | High   | 12 | 13 | 16  | 13 | 1271 | 144.7  | 6.06  | 256   | 101.1 | 102.5 | 105.6 | 97.7  | 98    | 95.1  |
| Q71M36 | <i>Cspg5</i>     | Chondroitin       | High   | 12 | 5  | 7   | 5  | 566  | 60.4   | 4.54  | 120   | 91.7  | 85.1  | 86.1  | 111   | 114.1 | 112   |
| Q921S7 | <i>Mrp137</i>    | 39S ribosomal     | High   | 11 | 4  | 5   | 4  | 423  | 48.3   | 8.84  | 100   | 93.4  | 99.3  | 99.9  | 97.1  | 104.1 | 106.1 |
| Q9D6F4 | <i>Gabra4</i>    | Gamma-            | High   | 15 | 7  | 7   | 7  | 552  | 60.8   | 9.32  | 55    | 92.6  | 101.3 | 93.6  | 106.3 | 106.3 | 99.9  |
| Q3TXX4 | <i>Slc17a7</i>   | Vesicular         | High   | 17 | 10 | 26  | 9  | 560  | 61.6   | 7.34  | 402   | 98    | 99.6  | 95.6  | 104.3 | 103.1 | 99.5  |
| Q9JJZ4 | <i>Ube2j1</i>    | Ubiquitin-        | Low    | 2  | 1  | 1   | 1  | 318  | 35     | 6.99  | 19    |       |       |       |       |       |       |
| P06151 | <i>Ldha</i>      | L-lactate         | High   | 45 | 21 | 65  | 20 | 332  | 36.5   | 7.74  | 1177  | 95.8  | 98.2  | 98.8  | 99.1  | 106.1 | 102   |
| Q61024 | <i>Asns</i>      | Asparagine        | High   | 18 | 8  | 10  | 8  | 561  | 64.2   | 6.58  | 145   | 102.2 | 98.9  | 100.7 | 98.3  | 99.5  | 100.3 |
| Q9CZW4 | <i>Acsl3</i>     | Long-chain-fatty- | High   | 15 | 8  | 10  | 7  | 720  | 80.4   | 8.54  | 169   | 98.7  | 100.5 | 101.3 | 98.5  | 95    | 106   |
| Q9WVM3 | <i>Anapc7</i>    | Anaphase-         | Medium | 3  | 1  | 1   | 1  | 565  | 63     | 5.72  | 0     |       |       |       |       |       |       |
| P10637 | <i>Mapt</i>      | Microtubule-      | High   | 32 | 19 | 52  | 19 | 733  | 76.2   | 6.79  | 697   | 94.4  | 97.4  | 87.8  | 109.1 | 108.4 | 103   |
| Q7TSH7 | <i>Kcnf1</i>     | Potassium         | High   | 3  | 1  | 1   | 1  | 493  | 55.6   | 6.06  | 45    |       |       |       |       |       |       |
| Q9ESY9 | <i>Ifi30</i>     | Gamma-            | High   | 4  | 1  | 1   | 1  | 248  | 27.8   | 5.01  | 34    |       |       |       |       |       |       |
| Q60823 | <i>Akt2</i>      | RAC-beta          | High   | 15 | 7  | 9   | 2  | 481  | 55.7   | 6.37  | 98    | 104.7 | 115.9 | 104.1 | 93.2  | 92.2  | 89.9  |
| Q5SXA9 | <i>Wwc1</i>      | Protein KIBRA     | High   | 1  | 1  | 1   | 1  | 1104 | 124    | 5.97  | 18    |       |       |       |       |       |       |
| P05064 | <i>Aldoa</i>     | Fructose-         | High   | 78 | 26 | 197 | 20 | 364  | 39.3   | 8.09  | 4681  | 97.3  | 99    | 96.7  | 100.7 | 103.7 | 102.5 |
| P22892 | <i>Ap1g1</i>     | AP-1 complex      | High   | 28 | 20 | 26  | 20 | 822  | 91.3   | 6.8   | 395   | 98.8  | 100.2 | 97.7  | 101   | 100.3 | 102   |
| Q8CCK0 | <i>Macroh2a2</i> | Core histone      | High   | 35 | 10 | 15  | 9  | 372  | 40.1   | 9.69  | 293   | 92.4  | 89.6  | 87.5  | 112.2 | 110.2 | 108.1 |
| Q8BUM6 | <i>Fam163b</i>   | Protein           | High   | 14 | 1  | 1   | 1  | 167  | 18.3   | 5.15  | 93    | 100.6 | 78.2  | 97.5  | 90.4  | 114.9 | 118.4 |
| Q8CGU1 | <i>Calcoco1</i>  | Calcium-binding   | High   | 16 | 8  | 10  | 8  | 691  | 77.2   | 4.82  | 191   | 93.5  | 93.2  | 96    | 99.5  | 103.4 | 114.4 |
| Q8K394 | <i>Plcl2</i>     | Inactive          | High   | 17 | 16 | 20  | 16 | 1128 | 125.7  | 6.92  | 328   | 96.7  | 103.8 | 87.1  | 105.8 | 102.7 | 103.9 |
| Q6A152 | <i>Cyp4x1</i>    | Cytochrome        | High   | 5  | 2  | 2   | 2  | 507  | 58.5   | 7.21  | 58    | 104.2 | 102.9 | 107.5 | 92.8  | 97.9  | 94.7  |
| Q5SS80 | <i>Dhrs13</i>    | Dehydrogenase/    | Low    | 2  | 1  | 1   | 1  | 376  | 40.7   | 7.93  | 0     |       |       |       |       |       |       |
| Q60749 | <i>Khdrbs1</i>   | KH domain-        | High   | 23 | 6  | 14  | 5  | 443  | 48.3   | 8.72  | 213   | 92.6  | 100.6 | 92.4  | 112.4 | 102.2 | 99.9  |
| Q80U35 | <i>Arhgef17</i>  | Rho guanine       | High   | 2  | 3  | 3   | 3  | 2057 | 221.5  | 6.3   | 23    | 95.6  | 98.8  | 89.2  | 104   | 101.7 | 110.7 |
| P08030 | <i>Aprt</i>      | Adenine           | High   | 28 | 5  | 6   | 5  | 180  | 19.7   | 6.79  | 82    | 103.9 | 100.4 | 114.8 | 87.5  | 91.7  | 101.7 |
| P19246 | <i>Nefh</i>      | Neurofilament     | High   | 17 | 16 | 27  | 13 | 1090 | 116.9  | 5.81  | 400   | 97.5  | 116.5 | 104.2 | 96.1  | 88.2  | 97.4  |
| Q8R3Q2 | <i>Ppp6r2</i>    | Serine/threonine  | High   | 15 | 10 | 12  | 10 | 923  | 100.4  | 4.82  | 151   | 91.6  | 100.7 | 91.4  | 110.3 | 101.2 | 104.7 |
| Q920B9 | <i>Supt16h</i>   | FACT complex      | High   | 3  | 3  | 3   | 3  | 1047 | 119.7  | 5.66  | 73    |       |       |       |       |       |       |
| P70182 | <i>Pip5k1a</i>   | Phosphatidylinos  | High   | 10 | 3  | 5   | 2  | 546  | 60.4   | 8.59  | 62    | 88.9  | 93.2  | 100.3 | 104.2 | 104.5 | 109   |
| P62717 | <i>Rpl18a</i>    | 60S ribosomal     | High   | 35 | 6  | 11  | 6  | 176  | 20.7   | 10.71 | 137   | 103.8 | 98.7  | 104.5 | 102.3 | 97    | 93.8  |
| Q6P9K8 | <i>Caskin1</i>   | Caskin-1          | High   | 23 | 21 | 33  | 21 | 1431 | 150.4  | 9.17  | 503   | 93.1  | 97.1  | 89.6  | 110.5 | 105.6 | 104.2 |
| Q8C166 | <i>Cpne1</i>     | Copine-1          | High   | 18 | 10 | 11  | 9  | 536  | 58.8   | 5.66  | 136   | 99.9  | 106.5 | 99.5  | 97.4  | 94.8  | 101.8 |
| Q922D8 | <i>Mthfd1</i>    | C-1-              | High   | 30 | 23 | 32  | 23 | 935  | 101.1  | 7.14  | 478   | 99.9  | 100.8 | 102.9 | 96.8  | 97.6  | 102.1 |
| Q921M3 | <i>Sf3b3</i>     | Splicing factor   | High   | 15 | 16 | 20  | 16 | 1217 | 135.5  | 5.26  | 256   | 102.9 | 96.3  | 103.7 | 100.6 | 95    | 101.4 |
| Q80TL4 | <i>Phf24</i>     | PHD finger        | High   | 38 | 13 | 18  | 13 | 400  | 45.2   | 5.77  | 237   | 96.3  | 97.1  | 87.8  | 108.4 | 105.2 | 105.3 |
| Q8K386 | <i>Rab15</i>     | Ras-related       | High   | 52 | 8  | 23  | 6  | 212  | 24.3   | 5.71  | 495   | 100.9 | 90.4  | 103.7 | 97.7  | 103.3 | 104.1 |
| Q9JI10 | <i>Stk3</i>      | Serine/threonine  | High   | 10 | 4  | 5   | 1  | 497  | 56.8   | 4.98  | 88    | 106.2 | 103.5 | 138.1 | 87.6  | 86.6  | 78    |

|        |                |                   |        |    |    |    |    |      |       |      |     |       |       |       |       |       |       |
|--------|----------------|-------------------|--------|----|----|----|----|------|-------|------|-----|-------|-------|-------|-------|-------|-------|
| Q80YR5 | <i>Safb2</i>   | Scaffold          | High   | 9  | 6  | 7  | 1  | 991  | 111.8 | 6.38 | 198 | 89.8  | 100.4 | 85.5  | 112.1 | 101.3 | 111   |
| O88712 | <i>Ctbp1</i>   | C-terminal-       | High   | 25 | 10 | 18 | 5  | 441  | 47.7  | 6.77 | 331 | 98.4  | 104.7 | 95.3  | 101.5 | 101.3 | 98.7  |
| Q9JMG1 | <i>Edf1</i>    | Endothelial       | High   | 28 | 4  | 4  | 4  | 148  | 16.4  | 9.99 | 69  | 99.7  | 100.5 | 113.1 | 99.2  | 94.4  | 93    |
| Q8K3E5 | <i>Ahi1</i>    | Jouberin          | Low    | 1  | 1  | 1  | 1  | 1047 | 119.6 | 7.18 | 0   | 93.7  | 95    | 95.2  | 106.1 | 101.6 | 108.3 |
| P70399 | <i>Tp53bp1</i> | TP53-binding      | High   | 2  | 3  | 3  | 3  | 1969 | 212.6 | 4.63 | 44  | 99.3  | 92.1  | 110.7 | 109.3 | 90.3  | 98.3  |
| Q8BRK8 | <i>Prkaa2</i>  | 5'-AMP-activated  | High   | 13 | 6  | 6  | 4  | 552  | 62    | 7.87 | 110 | 91.7  | 100.4 | 97.2  | 103.6 | 101.7 | 105.4 |
| P28667 | <i>Marcks1</i> | MARCKS-           | High   | 14 | 2  | 3  | 2  | 200  | 20.2  | 4.61 | 120 | 92.8  | 83.7  | 95.1  | 103.3 | 111.4 | 113.7 |
| Q8BH64 | <i>Ehd2</i>    | EH domain-        | High   | 3  | 1  | 1  | 1  | 543  | 61.1  | 6.51 | 31  | 101.9 | 93.1  | 93    | 102.4 | 103.9 | 105.7 |
| Q6A028 | <i>Swap70</i>  | Switch-           | High   | 8  | 4  | 4  | 4  | 585  | 69    | 6.05 | 49  | 108.7 | 97.4  | 108.7 | 97.6  | 94.5  | 93.1  |
| Q9DBE0 | <i>Csad</i>    | Cysteine sulfinic | High   | 4  | 2  | 3  | 2  | 493  | 55.1  | 6.61 | 36  | 93.4  | 99.9  | 102.6 | 95.2  | 102.7 | 106.2 |
| Q9ES56 | <i>Trappc4</i> | Trafficking       | High   | 25 | 5  | 5  | 5  | 219  | 24.4  | 6.21 | 122 | 97.6  | 100.7 | 101.7 | 101.2 | 101.3 | 97.4  |
| Q80W21 | <i>Gstm7</i>   | Glutathione S-    | High   | 50 | 9  | 20 | 5  | 218  | 25.7  | 6.8  | 372 | 99.1  | 102.6 | 101.2 | 97.6  | 101.3 | 98.2  |
| Q8BTZ7 | <i>Gmppb</i>   | Mannose-1-        | High   | 16 | 4  | 4  | 4  | 360  | 39.9  | 6.74 | 60  | 100.4 | 108.3 | 97.6  | 96.5  | 99    | 98.2  |
| Q9Z1K5 | <i>Arih1</i>   | E3 ubiquitin-     | High   | 6  | 3  | 4  | 3  | 555  | 64    | 5.08 | 30  | 98.3  | 100.6 | 92.7  | 99.9  | 105.9 | 102.6 |
| Q4VGL6 | <i>Rc3h1</i>   | Roquin-1          | High   | 4  | 2  | 3  | 2  | 1130 | 125.3 | 7.27 | 33  | 93.1  | 98.6  | 84.9  | 101.6 | 114.9 | 106.8 |
| Q8BHN3 | <i>Ganab</i>   | Neutral alpha-    | High   | 23 | 20 | 26 | 20 | 944  | 106.8 | 6.06 | 476 | 100.3 | 102.1 | 104.5 | 96.9  | 98.9  | 97.2  |
| Q61315 | <i>Apc</i>     | Adenomatous       | High   | 2  | 5  | 5  | 5  | 2845 | 310.9 | 7.58 | 73  | 93.3  | 98.4  | 95.7  | 108.7 | 97.7  | 106.1 |
| Q99P47 | <i>Cntnap4</i> | Contactin-        | High   | 3  | 4  | 4  | 4  | 1310 | 144.6 | 7.06 | 60  | 95.5  | 80.7  | 100.6 | 98.9  | 120.2 | 104.1 |
| Q9R0Q7 | <i>Ptges3</i>  | Prostaglandin E   | High   | 39 | 6  | 11 | 6  | 160  | 18.7  | 4.55 | 135 | 99.5  | 102.1 | 107.7 | 101.4 | 92.8  | 96.5  |
| Q91XQ0 | <i>Dnah8</i>   | Dynein heavy      | Medium | 1  | 2  | 2  | 2  | 4731 | 540.9 | 6.18 | 14  | 97.1  | 93.1  | 82.6  | 105   | 90.8  | 131.4 |
| Q61410 | <i>Prkg2</i>   | cGMP-             | High   | 4  | 2  | 3  | 2  | 762  | 87    | 8.22 | 56  | 94.3  | 101.4 | 92.8  | 105   | 104.5 | 102   |
| P54103 | <i>Dnajc2</i>  | DnaJ homolog      | High   | 4  | 2  | 2  | 2  | 621  | 71.7  | 8.7  | 62  | 80    | 111   | 95.4  | 102.5 | 109   | 102   |
| Q01147 | <i>Creb1</i>   | Cyclic AMP-       | Medium | 3  | 1  | 1  | 1  | 327  | 35.1  | 5.27 | 17  | 118.5 | 103.6 | 97.7  | 92.1  | 98.9  | 89.2  |
| Q3UYC0 | <i>Ppm1h</i>   | Protein           | High   | 15 | 7  | 9  | 7  | 513  | 56.3  | 6.73 | 126 | 98    | 100.1 | 92.5  | 107.4 | 103.1 | 99    |
| Q8C0C7 | <i>Farsa</i>   | Phenylalanine--   | High   | 28 | 13 | 20 | 13 | 508  | 57.6  | 8.28 | 458 | 98.6  | 98.1  | 97.4  | 100.8 | 102.4 | 102.6 |
| Q99L47 | <i>St13</i>    | Hsc70-            | High   | 28 | 10 | 19 | 10 | 371  | 41.6  | 5.26 | 269 | 103.3 | 104.1 | 104.6 | 95.9  | 96.1  | 96.1  |
| P97819 | <i>Pla2g6</i>  | 85/88 kDa         | Medium | 1  | 1  | 1  | 1  | 807  | 89.5  | 7.24 | 44  | 86.2  | 93.7  | 113.8 | 95.9  | 91.6  | 118.8 |
| Q9D7B6 | <i>Acad8</i>   | Isobutyryl-CoA    | High   | 24 | 9  | 12 | 9  | 413  | 45    | 8.13 | 204 | 93.7  | 97.9  | 102   | 102.5 | 100.6 | 103.4 |
| Q9Z0E6 | <i>Gbp2</i>    | Guanylate-        | High   | 16 | 7  | 9  | 7  | 589  | 66.7  | 5.71 | 257 | 104.6 | 127.4 | 196.8 | 57.2  | 56.4  | 57.6  |
| Q9QYP6 | <i>Azi2</i>    | 5-azacytidine-    | High   | 5  | 2  | 2  | 2  | 405  | 46.1  | 6.7  | 27  | 108.6 | 94    | 102.6 | 95.4  | 101.4 | 98.1  |
| Q6NXN1 | <i>Szrd1</i>   | SUZ domain-       | Medium | 13 | 1  | 1  | 1  | 152  | 17    | 9    | 0   | 101   | 96.1  | 99.5  | 100   | 101.9 | 101.5 |
